# Supplementary material for: Antibiotic Contamination and AMR Dynamics in the Urban Sewage Microbiome: Insights from a Longitudinal surveillance
Source: Research Square preprint supplement (doi:10.21203/rs.3.rs-6137541/v1), 2025-03-12
Supplement: Supplementary file 1 [file 055e2abe9e52c8e366080237.xlsx]

## Sheet: S1a
Serial Number	Sample Name	Sample ID	Sample Type	Analyte Peak Name	Calculated Concentration (ng/mL)
1	AMP STD A	AMPR-2	Standard	Ampicillin	1.009
2	AMP STD B	AMPR-3	Standard	Ampicillin	1.971
3	AMP STD C	AMPR-4	Standard	Ampicillin	31.052
4	AMP STD D	AMPR-5	Standard	Ampicillin	43.18
5	AMP STD E	AMPR-6	Standard	Ampicillin	108.124
6	AMP STD F	AMPR-7	Standard	Ampicillin	130.589
7	AMP STD G	AMPR-8	Standard	Ampicillin	153.81
8	AMP STD H	AMPR-9	Standard	Ampicillin	191.033
9	SPL-43	AMPR-10	Unknown	Ampicillin	< 0
10	SPL-44	AMPR-11	Unknown	Ampicillin	< 0
11	SPL-45	AMPR-12	Unknown	Ampicillin	No Peak
12	SPL-46	AMPR-13	Unknown	Ampicillin	< 0
13	SPL-47	AMPR-14	Unknown	Ampicillin	< 0
14	SPL-48	AMPR-15	Unknown	Ampicillin	< 0
15	SPL-49	AMPR-16	Unknown	Ampicillin	< 0
16	SPL-50	AMPR-17	Unknown	Ampicillin	No Peak
17	SPL-51	AMPR-18	Unknown	Ampicillin	No Peak
18	SPL-52	AMPR-19	Unknown	Ampicillin	No Peak
19	SPL-53	AMPR-20	Unknown	Ampicillin	< 0
20	SPL-54	AMPR-21	Unknown	Ampicillin	No Peak
21	SPL-55	AMPR-22	Unknown	Ampicillin	No Peak
22	SPL-56	AMPR-23	Unknown	Ampicillin	No Peak
23	SPL-57	AMPR-24	Unknown	Ampicillin	No Peak
24	SPL-58	AMPR-25	Unknown	Ampicillin	No Peak
25	SPL-59	AMPR-26	Unknown	Ampicillin	No Peak
26	SPL-60	AMPR-27	Unknown	Ampicillin	No Peak
27	SPL-61	AMPR-28	Unknown	Ampicillin	< 0
28	SPL-62	AMPR-29	Unknown	Ampicillin	No Peak
29	SPL-63	AMPR-30	Unknown	Ampicillin	No Peak
30	SPL-64	AMPR-31	Unknown	Ampicillin	< 0
31	SPL-65	AMPR-32	Unknown	Ampicillin	No Peak
32	SPL-66	AMPR-33	Unknown	Ampicillin	No Peak
33	SPL-67	AMPR-34	Unknown	Ampicillin	< 0
34	SPL-68	AMPR-35	Unknown	Ampicillin	< 0
35	SPL-69	AMPR-36	Unknown	Ampicillin	< 0
36	SPL-70	AMPR-37	Unknown	Ampicillin	No Peak
37	SPL-71	AMPR-38	Unknown	Ampicillin	< 0
38	SPL-72	AMPR-39	Unknown	Ampicillin	No Peak
39	SPL-73	AMPR-40	Unknown	Ampicillin	No Peak
40	SPL-74	AMPR-41	Unknown	Ampicillin	< 0
41	SPL-75	AMPR-42	Unknown	Ampicillin	< 0
42	SPL-76	AMPR-43	Unknown	Ampicillin	No Peak
43	SPL-77	AMPR-44	Unknown	Ampicillin	< 0
44	SPL-78	AMPR-45	Unknown	Ampicillin	< 0
45	SPL-79	AMPR-46	Unknown	Ampicillin	No Peak
46	SPL-80	AMPR-47	Unknown	Ampicillin	No Peak
47	SPL-81	AMPR-48	Unknown	Ampicillin	No Peak
48	SPL-82	AMPR-49	Unknown	Ampicillin	No Peak
49	SPL-83	AMPR-50	Unknown	Ampicillin	No Peak
50	SPL-84	AMPR-51	Unknown	Ampicillin	< 0
51	SPL-85	AMPR-52	Unknown	Ampicillin	No Peak
52	SPL-86	AMPR-53	Unknown	Ampicillin	< 0
53	SPL-87	AMPR-54	Unknown	Ampicillin	No Peak
54	SPL-88	AMPR-55	Unknown	Ampicillin	< 0
55	SPL-89	AMPR-56	Unknown	Ampicillin	No Peak
56	SPL-90	AMPR-57	Unknown	Ampicillin	No Peak
57	SPL-91	AMPR-58	Unknown	Ampicillin	No Peak
58	SPL-99	AMPR-59	Unknown	Ampicillin	< 0
59	SPL-100	AMPR-60	Unknown	Ampicillin	No Peak
60	SPL-101	AMPR-61	Unknown	Ampicillin	< 0
61	SPL-102	AMPR-62	Unknown	Ampicillin	No Peak
62	SPL-103	AMPR-63	Unknown	Ampicillin	No Peak
63	SPL-104	AMPR-64	Unknown	Ampicillin	No Peak
64	SPL-105	AMPR-65	Unknown	Ampicillin	No Peak
65	SPL-106	AMPR-66	Unknown	Ampicillin	< 0
66	SPL-107	AMPR-67	Unknown	Ampicillin	< 0
67	SPL-108	AMPR-68	Unknown	Ampicillin	No Peak
68	SPL-109	AMPR-69	Unknown	Ampicillin	No Peak
69	SPL-110	AMPR-70	Unknown	Ampicillin	No Peak
70	SPL-111	AMPR-71	Unknown	Ampicillin	< 0
71	SPL-112	AMPR-72	Unknown	Ampicillin	No Peak
72	SPL-113	AMPR-73	Unknown	Ampicillin	< 0
73	SPL-114	AMPR-74	Unknown	Ampicillin	No Peak
74	SPL-115	AMPR-75	Unknown	Ampicillin	No Peak
75	SPL-116	AMPR-76	Unknown	Ampicillin	No Peak
76	SPL-117	AMPR-77	Unknown	Ampicillin	No Peak
77	SPL-118	AMPR-78	Unknown	Ampicillin	< 0
78	SPL-119	AMPR-79	Unknown	Ampicillin	No Peak
79	SPL-120	AMPR-80	Unknown	Ampicillin	< 0
80	SPL-121	AMPR-81	Unknown	Ampicillin	No Peak
81	SPL-122	AMPR-82	Unknown	Ampicillin	< 0
82	SPL-123	AMPR-83	Unknown	Ampicillin	No Peak
83	SPL-124	AMPR-84	Unknown	Ampicillin	< 0
84	SPL-125	AMPR-85	Unknown	Ampicillin	< 0
85	SPL-126	AMPR-86	Unknown	Ampicillin	No Peak
86	SPL-127	AMPR-87	Unknown	Ampicillin	No Peak
87	SPL-128	AMPR-88	Unknown	Ampicillin	No Peak
88	SPL-129	AMPR-89	Unknown	Ampicillin	No Peak
89	SPL-130	AMPR-90	Unknown	Ampicillin	No Peak
90	SPL-131	AMPR-91	Unknown	Ampicillin	< 0
91	SPL-132	AMPR-92	Unknown	Ampicillin	No Peak
92	SPL-133	AMPR-93	Unknown	Ampicillin	< 0
93	SPL-134	AMPR-94	Unknown	Ampicillin	No Peak
94	SPL-135	AMPR-95	Unknown	Ampicillin	No Peak
95	SPL-136	AMPR-96	Unknown	Ampicillin	No Peak
96	SPL-137	AMPR-97	Unknown	Ampicillin	No Peak
97	SPL-138	AMPR-98	Unknown	Ampicillin	< 0
98	SPL-139	AMPR-99	Unknown	Ampicillin	< 0
99	SPL-140	AMPR-100	Unknown	Ampicillin	No Peak
100	SPL-141	AMPR-101	Unknown	Ampicillin	No Peak
101	SPL-142	AMPR-102	Unknown	Ampicillin	< 0
102	SPL-143	AMPR-103	Unknown	Ampicillin	No Peak
103	SPL-144	AMPR-104	Unknown	Ampicillin	No Peak
104	SPL-145	AMPR-105	Unknown	Ampicillin	< 0
105	SPL-146	AMPR-106	Unknown	Ampicillin	No Peak
106	SPL-147	AMPR-107	Unknown	Ampicillin	No Peak
107	SPL-148	AMPR-108	Unknown	Ampicillin	No Peak
108	SPL-149	AMPR-109	Unknown	Ampicillin	No Peak
109	SPL-150	AMPR-110	Unknown	Ampicillin	No Peak
110	SPL-151	AMPR-111	Unknown	Ampicillin	< 0

## Sheet: S1b
Serial Number	Sample Name	Sample ID	Sample Type	Analyte Peak Name	Calculated Concentration (ng/mL)
1	AZI STD A	AZIR-2	Standard	Azithromycin	0.262
2	AZI STD B	AZIR-3	Standard	Azithromycin	0.451
3	AZI STD C	AZIR-4	Standard	Azithromycin	6.42
4	AZI STD D	AZIR-5	Standard	Azithromycin	12.338
5	AZI STD E	AZIR-6	Standard	Azithromycin	25.078
6	AZI STD F	AZIR-7	Standard	Azithromycin	31.63
7	AZI STD G	AZIR-8	Standard	Azithromycin	47.199
8	AZI STD H	AZIR-9	Standard	Azithromycin	53.188
9	SPL-43	AZIR-10	Unknown	Azithromycin	0.022
10	SPL-44	AZIR-11	Unknown	Azithromycin	0.073
11	SPL-45	AZIR-12	Unknown	Azithromycin	0.022
12	SPL-46	AZIR-13	Unknown	Azithromycin	0.237
13	SPL-47	AZIR-14	Unknown	Azithromycin	0.023
14	SPL-48	AZIR-15	Unknown	Azithromycin	0.017
15	SPL-49	AZIR-16	Unknown	Azithromycin	0.566
16	SPL-50	AZIR-17	Unknown	Azithromycin	0.025
17	SPL-51	AZIR-18	Unknown	Azithromycin	0.019
18	SPL-52	AZIR-19	Unknown	Azithromycin	0.594
19	SPL-53	AZIR-20	Unknown	Azithromycin	0.046
20	SPL-54	AZIR-21	Unknown	Azithromycin	No Peak
21	SPL-55	AZIR-22	Unknown	Azithromycin	0.026
22	SPL-56	AZIR-23	Unknown	Azithromycin	0.022
23	SPL-57	AZIR-24	Unknown	Azithromycin	0.219
24	SPL-58	AZIR-25	Unknown	Azithromycin	0.022
25	SPL-59	AZIR-26	Unknown	Azithromycin	0.017
26	SPL-60	AZIR-27	Unknown	Azithromycin	0.021
27	SPL-61	AZIR-28	Unknown	Azithromycin	0.32
28	SPL-62	AZIR-29	Unknown	Azithromycin	0.028
29	SPL-63	AZIR-30	Unknown	Azithromycin	0.041
30	SPL-64	AZIR-31	Unknown	Azithromycin	No Peak
31	SPL-65	AZIR-32	Unknown	Azithromycin	1.015
32	SPL-66	AZIR-33	Unknown	Azithromycin	5.149
33	SPL-67	AZIR-34	Unknown	Azithromycin	No Peak
34	SPL-68	AZIR-35	Unknown	Azithromycin	0.017
35	SPL-69	AZIR-36	Unknown	Azithromycin	0.026
36	SPL-70	AZIR-37	Unknown	Azithromycin	0.029
37	SPL-71	AZIR-38	Unknown	Azithromycin	0.031
38	SPL-72	AZIR-39	Unknown	Azithromycin	0.028
39	SPL-73	AZIR-40	Unknown	Azithromycin	No Peak
40	SPL-74	AZIR-41	Unknown	Azithromycin	0.025
41	SPL-75	AZIR-42	Unknown	Azithromycin	0.351
42	SPL-76	AZIR-43	Unknown	Azithromycin	0.111
43	SPL-77	AZIR-44	Unknown	Azithromycin	0.169
44	SPL-78	AZIR-45	Unknown	Azithromycin	2.869
45	SPL-79	AZIR-46	Unknown	Azithromycin	0.132
46	SPL-80	AZIR-47	Unknown	Azithromycin	1.152
47	SPL-81	AZIR-48	Unknown	Azithromycin	0.446
48	SPL-82	AZIR-49	Unknown	Azithromycin	0.27
49	SPL-83	AZIR-50	Unknown	Azithromycin	0.018
50	SPL-84	AZIR-51	Unknown	Azithromycin	0.02
51	SPL-85	AZIR-52	Unknown	Azithromycin	0.254
52	SPL-86	AZIR-53	Unknown	Azithromycin	0.704
53	SPL-87	AZIR-54	Unknown	Azithromycin	0.38
54	SPL-88	AZIR-55	Unknown	Azithromycin	0.202
55	SPL-89	AZIR-56	Unknown	Azithromycin	0.29
56	SPL-90	AZIR-57	Unknown	Azithromycin	1.199
57	SPL-91	AZIR-58	Unknown	Azithromycin	0.302
58	SPL-99	AZIR-59	Unknown	Azithromycin	0.058
59	SPL-100	AZIR-60	Unknown	Azithromycin	0.11
60	SPL-101	AZIR-61	Unknown	Azithromycin	0.024
61	SPL-102	AZIR-62	Unknown	Azithromycin	0.115
62	SPL-103	AZIR-63	Unknown	Azithromycin	0.132
63	SPL-104	AZIR-64	Unknown	Azithromycin	0.479
64	SPL-105	AZIR-65	Unknown	Azithromycin	0.295
65	SPL-106	AZIR-66	Unknown	Azithromycin	0.126
66	SPL-107	AZIR-67	Unknown	Azithromycin	0.176
67	SPL-108	AZIR-68	Unknown	Azithromycin	0.117
68	SPL-109	AZIR-69	Unknown	Azithromycin	0.119
69	SPL-110	AZIR-70	Unknown	Azithromycin	0.09
70	SPL-111	AZIR-71	Unknown	Azithromycin	0.189
71	SPL-112	AZIR-72	Unknown	Azithromycin	0.152
72	SPL-113	AZIR-73	Unknown	Azithromycin	0.108
73	SPL-114	AZIR-74	Unknown	Azithromycin	0.823
74	SPL-115	AZIR-75	Unknown	Azithromycin	0.778
75	SPL-116	AZIR-76	Unknown	Azithromycin	0.112
76	SPL-117	AZIR-77	Unknown	Azithromycin	0.032
77	SPL-118	AZIR-78	Unknown	Azithromycin	0.167
78	SPL-119	AZIR-79	Unknown	Azithromycin	0.107
79	SPL-120	AZIR-80	Unknown	Azithromycin	0.116
80	SPL-121	AZIR-81	Unknown	Azithromycin	0.724
81	SPL-122	AZIR-82	Unknown	Azithromycin	0.713
82	SPL-123	AZIR-83	Unknown	Azithromycin	0.054
83	SPL-124	AZIR-84	Unknown	Azithromycin	0.2
84	SPL-125	AZIR-85	Unknown	Azithromycin	0.22
85	SPL-126	AZIR-86	Unknown	Azithromycin	0.053
86	SPL-127	AZIR-87	Unknown	Azithromycin	0.085
87	SPL-128	AZIR-88	Unknown	Azithromycin	0.2
88	SPL-129	AZIR-89	Unknown	Azithromycin	0.211
89	SPL-130	AZIR-90	Unknown	Azithromycin	0.05
90	SPL-131	AZIR-91	Unknown	Azithromycin	0.04
91	SPL-132	AZIR-92	Unknown	Azithromycin	0.037
92	SPL-133	AZIR-93	Unknown	Azithromycin	0.104
93	SPL-134	AZIR-94	Unknown	Azithromycin	0.09
94	SPL-135	AZIR-95	Unknown	Azithromycin	0.106
95	SPL-136	AZIR-96	Unknown	Azithromycin	0.127
96	SPL-137	AZIR-97	Unknown	Azithromycin	0.285
97	SPL-138	AZIR-98	Unknown	Azithromycin	0.039
98	SPL-139	AZIR-99	Unknown	Azithromycin	0.025
99	SPL-140	AZIR-100	Unknown	Azithromycin	0.06
100	SPL-141	AZIR-101	Unknown	Azithromycin	0.036
101	SPL-142	AZIR-102	Unknown	Azithromycin	0.027
102	SPL-143	AZIR-103	Unknown	Azithromycin	0.159
103	SPL-144	AZIR-104	Unknown	Azithromycin	0.128
104	SPL-145	AZIR-105	Unknown	Azithromycin	No Peak
105	SPL-146	AZIR-106	Unknown	Azithromycin	No Peak
106	SPL-147	AZIR-107	Unknown	Azithromycin	0.065
107	SPL-148	AZIR-108	Unknown	Azithromycin	0.053
108	SPL-149	AZIR-109	Unknown	Azithromycin	No Peak
109	SPL-150	AZIR-110	Unknown	Azithromycin	0.159
110	SPL-151	AZI4-111	Unknown	Azithromycin	0.133

## Sheet: S1c
Serial Number	Sample Name	Sample ID	Sample Type	Analyte Peak Name	Calculated Concentration (ng/mL)
1	NA STD A	NAR-2	Standard	Nalidixic Acid	0.13
2	NA STD B	NAR-3	Standard	Nalidixic Acid	0.227
3	NA STD C	NAR-4	Standard	Nalidixic Acid	3.464
4	NA STD D	NAR-5	Standard	Nalidixic Acid	7.307
5	NA STD E	NAR-6	Standard	Nalidixic Acid	12.738
6	NA STD F	NAR-7	Standard	Nalidixic Acid	16.168
7	NA STD G	NAR-8	Standard	Nalidixic Acid	20.124
8	NA STD H	NAR-9	Standard	Nalidixic Acid	23.155
9	SPL-43	NAR-10	Unknown	Nalidixic Acid	< 0
10	SPL-44	NAR-11	Unknown	Nalidixic Acid	< 0
11	SPL-45	NAR-12	Unknown	Nalidixic Acid	< 0
12	SPL-46	NAR-13	Unknown	Nalidixic Acid	< 0
13	SPL-47	NAR-14	Unknown	Nalidixic Acid	< 0
14	SPL-48	NAR-15	Unknown	Nalidixic Acid	< 0
15	SPL-49	NAR-16	Unknown	Nalidixic Acid	< 0
16	SPL-50	NAR-17	Unknown	Nalidixic Acid	< 0
17	SPL-51	NAR-18	Unknown	Nalidixic Acid	< 0
18	SPL-52	NAR-19	Unknown	Nalidixic Acid	1.089
19	SPL-53	NAR-20	Unknown	Nalidixic Acid	< 0
20	SPL-54	NAR-21	Unknown	Nalidixic Acid	< 0
21	SPL-55	NAR-22	Unknown	Nalidixic Acid	< 0
22	SPL-56	NAR-23	Unknown	Nalidixic Acid	< 0
23	SPL-57	NAR-24	Unknown	Nalidixic Acid	< 0
24	SPL-58	NAR-25	Unknown	Nalidixic Acid	0
25	SPL-59	NAR-26	Unknown	Nalidixic Acid	< 0
26	SPL-60	NAR-27	Unknown	Nalidixic Acid	< 0
27	SPL-61	NAR-28	Unknown	Nalidixic Acid	< 0
28	SPL-62	NAR-29	Unknown	Nalidixic Acid	< 0
29	SPL-63	NAR-30	Unknown	Nalidixic Acid	< 0
30	SPL-64	NAR-31	Unknown	Nalidixic Acid	< 0
31	SPL-65	NAR-32	Unknown	Nalidixic Acid	0.097
32	SPL-66	NAR-33	Unknown	Nalidixic Acid	< 0
33	SPL-67	NAR-34	Unknown	Nalidixic Acid	< 0
34	SPL-68	NAR-35	Unknown	Nalidixic Acid	< 0
35	SPL-69	NAR-36	Unknown	Nalidixic Acid	< 0
36	SPL-70	NAR-37	Unknown	Nalidixic Acid	< 0
37	SPL-71	NAR-38	Unknown	Nalidixic Acid	< 0
38	SPL-72	NAR-39	Unknown	Nalidixic Acid	0.11
39	SPL-73	NAR-40	Unknown	Nalidixic Acid	< 0
40	SPL-74	NAR-41	Unknown	Nalidixic Acid	< 0
41	SPL-75	NAR-42	Unknown	Nalidixic Acid	< 0
42	SPL-76	NAR-43	Unknown	Nalidixic Acid	< 0
43	SPL-77	NAR-44	Unknown	Nalidixic Acid	< 0
44	SPL-78	NAR-45	Unknown	Nalidixic Acid	< 0
45	SPL-79	NAR-46	Unknown	Nalidixic Acid	< 0
46	SPL-80	NAR-47	Unknown	Nalidixic Acid	< 0
47	SPL-81	NAR-48	Unknown	Nalidixic Acid	< 0
48	SPL-82	NAR-49	Unknown	Nalidixic Acid	< 0
49	SPL-83	NAR-50	Unknown	Nalidixic Acid	< 0
50	SPL-84	NAR-51	Unknown	Nalidixic Acid	< 0
51	SPL-85	NAR-52	Unknown	Nalidixic Acid	0.049
52	SPL-86	NAR-53	Unknown	Nalidixic Acid	< 0
53	SPL-87	NAR-54	Unknown	Nalidixic Acid	0.071
54	SPL-88	NAR-55	Unknown	Nalidixic Acid	< 0
55	SPL-89	NAR-56	Unknown	Nalidixic Acid	< 0
56	SPL-90	NAR-57	Unknown	Nalidixic Acid	< 0
57	SPL-91	NAR-58	Unknown	Nalidixic Acid	< 0
58	SPL-99	NAR-59	Unknown	Nalidixic Acid	< 0
59	SPL-100	NAR-60	Unknown	Nalidixic Acid	< 0
60	SPL-101	NAR-61	Unknown	Nalidixic Acid	< 0
61	SPL-102	NAR-62	Unknown	Nalidixic Acid	2.001
62	SPL-103	NAR-63	Unknown	Nalidixic Acid	2.115
63	SPL-104	NAR-64	Unknown	Nalidixic Acid	< 0
64	SPL-105	NAR-65	Unknown	Nalidixic Acid	< 0
65	SPL-106	NAR-66	Unknown	Nalidixic Acid	< 0
66	SPL-107	NAR-67	Unknown	Nalidixic Acid	< 0
67	SPL-108	NAR-68	Unknown	Nalidixic Acid	< 0
68	SPL-109	NAR-69	Unknown	Nalidixic Acid	0.836
69	SPL-110	NAR-70	Unknown	Nalidixic Acid	0.813
70	SPL-111	NAR-71	Unknown	Nalidixic Acid	< 0
71	SPL-112	NAR-72	Unknown	Nalidixic Acid	< 0
72	SPL-113	NAR-73	Unknown	Nalidixic Acid	< 0
73	SPL-114	NAR-74	Unknown	Nalidixic Acid	0.304
74	SPL-115	NAR-75	Unknown	Nalidixic Acid	0.336
75	SPL-116	NAR-76	Unknown	Nalidixic Acid	< 0
76	SPL-117	NAR-77	Unknown	Nalidixic Acid	< 0
77	SPL-118	NAR-78	Unknown	Nalidixic Acid	< 0
78	SPL-119	NAR-79	Unknown	Nalidixic Acid	< 0
79	SPL-120	NAR-80	Unknown	Nalidixic Acid	< 0
80	SPL-121	NAR-81	Unknown	Nalidixic Acid	0.418
81	SPL-122	NAR-82	Unknown	Nalidixic Acid	0.394
82	SPL-123	NAR-83	Unknown	Nalidixic Acid	< 0
83	SPL-124	NAR-84	Unknown	Nalidixic Acid	< 0
84	SPL-125	NAR-85	Unknown	Nalidixic Acid	< 0
85	SPL-126	NAR-86	Unknown	Nalidixic Acid	< 0
86	SPL-127	NAR-87	Unknown	Nalidixic Acid	< 0
87	SPL-128	NAR-88	Unknown	Nalidixic Acid	0.573
88	SPL-129	NAR-89	Unknown	Nalidixic Acid	0.938
89	SPL-130	NAR-90	Unknown	Nalidixic Acid	< 0
90	SPL-131	NAR-91	Unknown	Nalidixic Acid	No Peak
91	SPL-132	NAR-92	Unknown	Nalidixic Acid	< 0
92	SPL-133	NAR-93	Unknown	Nalidixic Acid	< 0
93	SPL-134	NAR-94	Unknown	Nalidixic Acid	< 0
94	SPL-135	NAR-95	Unknown	Nalidixic Acid	< 0
95	SPL-136	NAR-96	Unknown	Nalidixic Acid	< 0
96	SPL-137	NAR-97	Unknown	Nalidixic Acid	< 0
97	SPL-138	NAR-98	Unknown	Nalidixic Acid	< 0
98	SPL-139	NAR-99	Unknown	Nalidixic Acid	< 0
99	SPL-140	NAR-100	Unknown	Nalidixic Acid	< 0
100	SPL-141	NAR-101	Unknown	Nalidixic Acid	< 0
101	SPL-142	NAR-102	Unknown	Nalidixic Acid	< 0
102	SPL-143	NAR-103	Unknown	Nalidixic Acid	< 0
103	SPL-144	NAR-104	Unknown	Nalidixic Acid	< 0
104	SPL-145	NAR-105	Unknown	Nalidixic Acid	< 0
105	SPL-146	NAR-106	Unknown	Nalidixic Acid	< 0
106	SPL-147	NAR-107	Unknown	Nalidixic Acid	< 0
107	SPL-148	NAR-108	Unknown	Nalidixic Acid	< 0
108	SPL-149	NAR-109	Unknown	Nalidixic Acid	< 0
109	SPL-150	NAR-110	Unknown	Nalidixic Acid	< 0
110	SPL-151	NAR-111	Unknown	Nalidixic Acid	< 0

## Sheet: S1d
Serial Number	Sample Name	Sample ID	Sample Type	Analyte Peak Name	Calculated Concentration (ng/mL)
1	MIX STD A	AMXR-1	Standard	Amoxicillin	0.964
2	MIX STD B	AMXR-2	Standard	Amoxicillin	2.171
3	MIX STD C	AMXR-3	Standard	Amoxicillin	26.629
4	MIX STD D	AMXR-4	Standard	Amoxicillin	51.253
5	MIX STD E	AMXR-5	Standard	Amoxicillin	88.282
6	MIX STD F	AMXR-6	Standard	Amoxicillin	143.709
7	MIX STD G	AMXR-7	Standard	Amoxicillin	231.423
8	MIX STD H	AMXR-8	Standard	Amoxicillin	182.864
9	SPL-43	AMXR-9	Unknown	Amoxicillin	3.533
10	SPL-44	AMXR-10	Unknown	Amoxicillin	10.14
11	SPL-45	AMXR-11	Unknown	Amoxicillin	5.835
12	SPL-46	AMXR-12	Unknown	Amoxicillin	9.291
13	SPL-47	AMXR-13	Unknown	Amoxicillin	< 0
14	SPL-48	AMXR-14	Unknown	Amoxicillin	6.25
15	SPL-49	AMXR-15	Unknown	Amoxicillin	2.192
16	SPL-50	AMXR-16	Unknown	Amoxicillin	< 0
17	SPL-51	AMXR-17	Unknown	Amoxicillin	< 0
18	SPL-52	AMXR-18	Unknown	Amoxicillin	0.046
19	SPL-53	AMXR-19	Unknown	Amoxicillin	0.934
20	SPL-54	AMXR-20	Unknown	Amoxicillin	0.593
21	SPL-55	AMXR-21	Unknown	Amoxicillin	0.416
22	SPL-56	AMXR-22	Unknown	Amoxicillin	1.78
23	SPL-57	AMXR-23	Unknown	Amoxicillin	1.495
24	SPL-58	AMXR-24	Unknown	Amoxicillin	1.012
25	SPL-59	AMXR-25	Unknown	Amoxicillin	2.043
26	SPL-60	AMXR-26	Unknown	Amoxicillin	1.83
27	SPL-61	AMXR-27	Unknown	Amoxicillin	< 0
28	SPL-62	AMXR-28	Unknown	Amoxicillin	3.622
29	SPL-63	AMXR-29	Unknown	Amoxicillin	4.449
30	SPL-64	AMXR-30	Unknown	Amoxicillin	2.133
31	SPL-65	AMXR-31	Unknown	Amoxicillin	0.22
32	SPL-66	AMXR-32	Unknown	Amoxicillin	< 0
33	SPL-67	AMXR-33	Unknown	Amoxicillin	< 0
34	SPL-68	AMXR-34	Unknown	Amoxicillin	< 0
35	SPL-69	AMXR-35	Unknown	Amoxicillin	0.24
36	SPL-70	AMXR-36	Unknown	Amoxicillin	3.936
37	SPL-71	AMXR-37	Unknown	Amoxicillin	2.42
38	SPL-72	AMXR-38	Unknown	Amoxicillin	1.627
39	SPL-73	AMXR-39	Unknown	Amoxicillin	2.236
40	SPL-74	AMXR-40	Unknown	Amoxicillin	2.696
41	SPL-75	AMXR-41	Unknown	Amoxicillin	4.611
42	SPL-76	AMXR-42	Unknown	Amoxicillin	1.65
43	SPL-77	AMXR-43	Unknown	Amoxicillin	< 0
44	SPL-78	AMXR-44	Unknown	Amoxicillin	< 0
45	SPL-79	AMXR-45	Unknown	Amoxicillin	0.32
46	SPL-80	AMXR-46	Unknown	Amoxicillin	0.078
47	SPL-81	AMXR-47	Unknown	Amoxicillin	0.016
48	SPL-82	AMXR-48	Unknown	Amoxicillin	10.525
49	SPL-83	AMXR-49	Unknown	Amoxicillin	2.491
50	SPL-84	AMXR-50	Unknown	Amoxicillin	2.642
51	SPL-85	AMXR-51	Unknown	Amoxicillin	< 0
52	SPL-86	AMXR-52	Unknown	Amoxicillin	2.434
53	SPL-87	AMXR-53	Unknown	Amoxicillin	1.199
54	SPL-88	AMXR-54	Unknown	Amoxicillin	1.479
55	SPL-89	AMXR-55	Unknown	Amoxicillin	< 0
56	SPL-90	AMXR-56	Unknown	Amoxicillin	0.074
57	SPL-91	AMXR-57	Unknown	Amoxicillin	0.013
58	SPL-99	AMXR-58	Unknown	Amoxicillin	10.402
59	SPL-100	AMXR-59	Unknown	Amoxicillin	5.746
60	SPL-101	AMXR-60	Unknown	Amoxicillin	8.114
61	SPL-102	AMXR-61	Unknown	Amoxicillin	< 0
62	SPL-103	AMXR-62	Unknown	Amoxicillin	3.387
63	SPL-104	AMXR-63	Unknown	Amoxicillin	3.378
64	SPL-105	AMXR-64	Unknown	Amoxicillin	0.093
65	SPL-106	AMXR-65	Unknown	Amoxicillin	0.195
66	SPL-107	AMXR-66	Unknown	Amoxicillin	5.105
67	SPL-108	AMXR-67	Unknown	Amoxicillin	< 0
68	SPL-109	AMXR-68	Unknown	Amoxicillin	4.069
69	SPL-110	AMXR-69	Unknown	Amoxicillin	2.683
70	SPL-111	AMXR-70	Unknown	Amoxicillin	< 0
71	SPL-112	AMXR-71	Unknown	Amoxicillin	< 0
72	SPL-113	AMXR-72	Unknown	Amoxicillin	0.009
73	SPL-114	AMXR-73	Unknown	Amoxicillin	1.281
74	SPL-115	AMXR-74	Unknown	Amoxicillin	< 0
75	SPL-116	AMXR-75	Unknown	Amoxicillin	0.102
76	SPL-117	AMXR-76	Unknown	Amoxicillin	< 0
77	SPL-118	AMXR-77	Unknown	Amoxicillin	0.247
78	SPL-119	AMXR-78	Unknown	Amoxicillin	< 0
79	SPL-120	AMXR-79	Unknown	Amoxicillin	< 0
80	SPL-121	AMXR-80	Unknown	Amoxicillin	0.006
81	SPL-122	AMXR-81	Unknown	Amoxicillin	1.495
82	SPL-123	AMXR-82	Unknown	Amoxicillin	< 0
83	SPL-124	AMXR-83	Unknown	Amoxicillin	0.079
84	SPL-125	AMXR-84	Unknown	Amoxicillin	5.149
85	SPL-126	AMXR-85	Unknown	Amoxicillin	< 0
86	SPL-127	AMXR-86	Unknown	Amoxicillin	5.442
87	SPL-128	AMXR-87	Unknown	Amoxicillin	0.01
88	SPL-129	AMXR-88	Unknown	Amoxicillin	< 0
89	SPL-130	AMXR-89	Unknown	Amoxicillin	< 0
90	SPL-131	AMXR-90	Unknown	Amoxicillin	< 0
91	SPL-132	AMXR-91	Unknown	Amoxicillin	0.091
92	SPL-133	AMXR-92	Unknown	Amoxicillin	0.019
93	SPL-134	AMXR-93	Unknown	Amoxicillin	< 0
94	SPL-135	AMXR-94	Unknown	Amoxicillin	2.153
95	SPL-136	AMXR-95	Unknown	Amoxicillin	0.121
96	SPL-137	AMXR-96	Unknown	Amoxicillin	< 0
97	SPL-138	AMXR-97	Unknown	Amoxicillin	0.063
98	SPL-139	AMXR-98	Unknown	Amoxicillin	0.664
99	SPL-140	AMXR-99	Unknown	Amoxicillin	0.156
100	SPL-141	AMXR-100	Unknown	Amoxicillin	0.004
101	SPL-142	AMXR-101	Unknown	Amoxicillin	2.797
102	SPL-143	AMXR-102	Unknown	Amoxicillin	0.275
103	SPL-144	AMXR-103	Unknown	Amoxicillin	0.072
104	SPL-145	AMXR-104	Unknown	Amoxicillin	0.212
105	SPL-146	AMXR-105	Unknown	Amoxicillin	0.789
106	SPL-147	AMXR-106	Unknown	Amoxicillin	2.434
107	SPL-148	AMXR-107	Unknown	Amoxicillin	< 0
108	SPL-149	AMXR-108	Unknown	Amoxicillin	0.142
109	SPL-150	AMXR-109	Unknown	Amoxicillin	< 0
110	SPL-151	AMXR-110	Unknown	Amoxicillin	0.082

## Sheet: S1e
Serial Number	Sample Name	Sample ID	Sample Type	Analyte Peak Name	Calculated Concentration (ng/mL)
1	KAN STD A	KANR-2	Standard	Kanamycin	4.035
2	KAN STD B	KANR-3	Standard	Kanamycin	8.166
3	KAN STD C	KANR-4	Standard	Kanamycin	41.888
4	KAN STD D	KANR-5	Standard	Kanamycin	86.08
5	KAN STD E	KANR-6	Standard	Kanamycin	194.519
6	KAN STD F	KANR-7	Standard	Kanamycin	273.082
7	KAN STD G	KANR-8	Standard	Kanamycin	385.31
8	KAN STD H	KANR-9	Standard	Kanamycin	456.834
9	SPL-43	KANR-10	Unknown	Kanamycin	2.828
10	SPL-44	KANR-11	Unknown	Kanamycin	2.509
11	SPL-45	KANR-12	Unknown	Kanamycin	2.36
12	SPL-46	KANR-13	Unknown	Kanamycin	2.434
13	SPL-47	KANR-14	Unknown	Kanamycin	2.161
14	SPL-48	KANR-15	Unknown	Kanamycin	2.193
15	SPL-49	KANR-16	Unknown	Kanamycin	2.173
16	SPL-50	KANR-17	Unknown	Kanamycin	2.272
17	SPL-51	KANR-18	Unknown	Kanamycin	2.151
18	SPL-52	KANR-19	Unknown	Kanamycin	2.249
19	SPL-53	KANR-20	Unknown	Kanamycin	2.132
20	SPL-54	KANR-21	Unknown	Kanamycin	2.219
21	SPL-55	KANR-22	Unknown	Kanamycin	2.15
22	SPL-56	KANR-23	Unknown	Kanamycin	2.397
23	SPL-57	KANR-24	Unknown	Kanamycin	2.208
24	SPL-58	KANR-25	Unknown	Kanamycin	2.4
25	SPL-59	KANR-26	Unknown	Kanamycin	2.183
26	SPL-60	KANR-27	Unknown	Kanamycin	2.246
27	SPL-61	KANR-28	Unknown	Kanamycin	2.242
28	SPL-62	KANR-29	Unknown	Kanamycin	2.241
29	SPL-63	KANR-30	Unknown	Kanamycin	2.143
30	SPL-64	KANR-31	Unknown	Kanamycin	No Peak
31	SPL-65	KANR-32	Unknown	Kanamycin	2.316
32	SPL-66	KANR-33	Unknown	Kanamycin	No Peak
33	SPL-67	KANR-34	Unknown	Kanamycin	2.153
34	SPL-68	KANR-35	Unknown	Kanamycin	2.144
35	SPL-69	KANR-36	Unknown	Kanamycin	2.21
36	SPL-70	KANR-37	Unknown	Kanamycin	2.121
37	SPL-71	KANR-38	Unknown	Kanamycin	2.237
38	SPL-72	KANR-39	Unknown	Kanamycin	No Peak
39	SPL-73	KANR-40	Unknown	Kanamycin	2.153
40	SPL-74	KANR-41	Unknown	Kanamycin	2.184
41	SPL-75	KANR-42	Unknown	Kanamycin	2.1
42	SPL-76	KANR-43	Unknown	Kanamycin	No Peak
43	SPL-77	KANR-44	Unknown	Kanamycin	2.077
44	SPL-78	KANR-45	Unknown	Kanamycin	2.193
45	SPL-79	KANR-46	Unknown	Kanamycin	2.09
46	SPL-80	KANR-47	Unknown	Kanamycin	2.122
47	SPL-81	KANR-48	Unknown	Kanamycin	2.095
48	SPL-82	KANR-49	Unknown	Kanamycin	2.092
49	SPL-83	KANR-50	Unknown	Kanamycin	No Peak
50	SPL-84	KANR-51	Unknown	Kanamycin	No Peak
51	SPL-85	KANR-52	Unknown	Kanamycin	2.113
52	SPL-86	KANR-53	Unknown	Kanamycin	No Peak
53	SPL-87	KANR-54	Unknown	Kanamycin	2.166
54	SPL-88	KANR-55	Unknown	Kanamycin	No Peak
55	SPL-89	KANR-56	Unknown	Kanamycin	2.14
56	SPL-90	KANR-57	Unknown	Kanamycin	No Peak
57	SPL-91	KANR-58	Unknown	Kanamycin	No Peak
58	SPL-99	KANR-59	Unknown	Kanamycin	No Peak
59	SPL-100	KANR-60	Unknown	Kanamycin	2.085
60	SPL-101	KANR-61	Unknown	Kanamycin	2.097
61	SPL-102	KANR-62	Unknown	Kanamycin	2.102
62	SPL-103	KANR-63	Unknown	Kanamycin	2.09
63	SPL-104	KANR-64	Unknown	Kanamycin	No Peak
64	SPL-105	KANR-65	Unknown	Kanamycin	2.226
65	SPL-106	KANR-66	Unknown	Kanamycin	No Peak
66	SPL-107	KANR-67	Unknown	Kanamycin	No Peak
67	SPL-108	KANR-68	Unknown	Kanamycin	No Peak
68	SPL-109	KANR-69	Unknown	Kanamycin	2.266
69	SPL-110	KANR-70	Unknown	Kanamycin	2.07
70	SPL-111	KANR-71	Unknown	Kanamycin	No Peak
71	SPL-112	KANR-72	Unknown	Kanamycin	No Peak
72	SPL-113	KANR-73	Unknown	Kanamycin	2.183
73	SPL-114	KANR-74	Unknown	Kanamycin	2.086
74	SPL-115	KANR-75	Unknown	Kanamycin	No Peak
75	SPL-116	KANR-76	Unknown	Kanamycin	2.112
76	SPL-117	KANR-77	Unknown	Kanamycin	2.088
77	SPL-118	KANR-78	Unknown	Kanamycin	No Peak
78	SPL-119	KANR-79	Unknown	Kanamycin	No Peak
79	SPL-120	KANR-80	Unknown	Kanamycin	2.079
80	SPL-121	KANR-81	Unknown	Kanamycin	2.092
81	SPL-122	KANR-82	Unknown	Kanamycin	2.105
82	SPL-123	KANR-83	Unknown	Kanamycin	2.15
83	SPL-124	KANR-84	Unknown	Kanamycin	No Peak
84	SPL-125	KANR-85	Unknown	Kanamycin	No Peak
85	SPL-126	KANR-86	Unknown	Kanamycin	No Peak
86	SPL-127	KANR-87	Unknown	Kanamycin	2.096
87	SPL-128	KANR-88	Unknown	Kanamycin	2.058
88	SPL-129	KANR-89	Unknown	Kanamycin	No Peak
89	SPL-130	KANR-90	Unknown	Kanamycin	No Peak
90	SPL-131	KANR-91	Unknown	Kanamycin	2.17
91	SPL-132	KANR-92	Unknown	Kanamycin	No Peak
92	SPL-133	KANR-93	Unknown	Kanamycin	No Peak
93	SPL-134	KANR-94	Unknown	Kanamycin	No Peak
94	SPL-135	KANR-95	Unknown	Kanamycin	2.114
95	SPL-136	KANR-96	Unknown	Kanamycin	2.239
96	SPL-137	KANR-97	Unknown	Kanamycin	No Peak
97	SPL-138	KANR-98	Unknown	Kanamycin	4.813
98	SPL-139	KANR-99	Unknown	Kanamycin	2.255
99	SPL-140	KANR-100	Unknown	Kanamycin	2.956
100	SPL-141	KANR-101	Unknown	Kanamycin	2.278
101	SPL-142	KANR-102	Unknown	Kanamycin	No Peak
102	SPL-143	KANR-103	Unknown	Kanamycin	2.107
103	SPL-144	KANR-104	Unknown	Kanamycin	2.119
104	SPL-145	KANR-105	Unknown	Kanamycin	2.117
105	SPL-146	KANR-106	Unknown	Kanamycin	No Peak
106	SPL-147	KANR-107	Unknown	Kanamycin	No Peak
107	SPL-148	KANR-108	Unknown	Kanamycin	2.162
108	SPL-149	KANR-109	Unknown	Kanamycin	No Peak
109	SPL-150	KANR-110	Unknown	Kanamycin	No Peak
110	SPL-151	KANR-111	Unknown	Kanamycin	2.152

## Sheet: S1f
Serial Number	Sample Name	Sample ID	Sample Type	Analyte Peak Name	Calculated Concentration (ng/mL)
1	ERY STD A	ERYR-2	Standard	Erythromycin	0.975
2	ERY STD B	ERYR-3	Standard	Erythromycin	2.137
3	ERY STD C	ERYR-4	Standard	Erythromycin	12.96
4	ERY STD D	ERYR-5	Standard	Erythromycin	35.571
5	ERY STD E	ERYR-6	Standard	Erythromycin	57.865
6	ERY STD F	ERYR-7	Standard	Erythromycin	63.52
7	ERY STD G	ERYR-8	Standard	Erythromycin	77.043
8	ERY STD H	ERYR-9	Standard	Erythromycin	94.225
9	SPL-43	ERYR-10	Unknown	Erythromycin	0.198
10	SPL-44	ERYR-11	Unknown	Erythromycin	< 0
11	SPL-45	ERYR-12	Unknown	Erythromycin	< 0
12	SPL-46	ERYR-13	Unknown	Erythromycin	< 0
13	SPL-47	ERYR-14	Unknown	Erythromycin	< 0
14	SPL-48	ERYR-15	Unknown	Erythromycin	< 0
15	SPL-49	ERYR-16	Unknown	Erythromycin	< 0
16	SPL-50	ERYR-17	Unknown	Erythromycin	< 0
17	SPL-51	ERYR-18	Unknown	Erythromycin	< 0
18	SPL-52	ERYR-19	Unknown	Erythromycin	< 0
19	SPL-53	ERYR-20	Unknown	Erythromycin	< 0
20	SPL-54	ERYR-21	Unknown	Erythromycin	< 0
21	SPL-55	ERYR-22	Unknown	Erythromycin	< 0
22	SPL-56	ERYR-23	Unknown	Erythromycin	< 0
23	SPL-57	ERYR-24	Unknown	Erythromycin	< 0
24	SPL-58	ERYR-25	Unknown	Erythromycin	0.198
25	SPL-59	ERYR-26	Unknown	Erythromycin	0.063
26	SPL-60	ERYR-27	Unknown	Erythromycin	0.032
27	SPL-61	ERYR-28	Unknown	Erythromycin	1.659
28	SPL-62	ERYR-29	Unknown	Erythromycin	< 0
29	SPL-63	ERYR-30	Unknown	Erythromycin	< 0
30	SPL-64	ERYR-31	Unknown	Erythromycin	< 0
31	SPL-65	ERYR-32	Unknown	Erythromycin	< 0
32	SPL-66	ERYR-33	Unknown	Erythromycin	0.014
33	SPL-67	ERYR-34	Unknown	Erythromycin	< 0
34	SPL-68	ERYR-35	Unknown	Erythromycin	< 0
35	SPL-69	ERYR-36	Unknown	Erythromycin	< 0
36	SPL-70	ERYR-37	Unknown	Erythromycin	< 0
37	SPL-71	ERYR-38	Unknown	Erythromycin	< 0
38	SPL-72	ERYR-39	Unknown	Erythromycin	0.043
39	SPL-73	ERYR-40	Unknown	Erythromycin	No Peak
40	SPL-74	ERYR-41	Unknown	Erythromycin	< 0
41	SPL-75	ERYR-42	Unknown	Erythromycin	< 0
42	SPL-76	ERYR-43	Unknown	Erythromycin	< 0
43	SPL-77	ERYR-44	Unknown	Erythromycin	0.105
44	SPL-78	ERYR-45	Unknown	Erythromycin	0.594
45	SPL-79	ERYR-46	Unknown	Erythromycin	0.162
46	SPL-80	ERYR-47	Unknown	Erythromycin	1.181
47	SPL-81	ERYR-48	Unknown	Erythromycin	< 0
48	SPL-82	ERYR-49	Unknown	Erythromycin	< 0
49	SPL-83	ERYR-50	Unknown	Erythromycin	< 0
50	SPL-84	ERYR-51	Unknown	Erythromycin	< 0
51	SPL-85	ERYR-52	Unknown	Erythromycin	1.269
52	SPL-86	ERYR-53	Unknown	Erythromycin	< 0
53	SPL-87	ERYR-54	Unknown	Erythromycin	0.747
54	SPL-88	ERYR-55	Unknown	Erythromycin	0.318
55	SPL-89	ERYR-56	Unknown	Erythromycin	0.259
56	SPL-90	ERYR-57	Unknown	Erythromycin	0.311
57	SPL-91	ERYR-58	Unknown	Erythromycin	< 0
58	SPL-99	ERYR-59	Unknown	Erythromycin	< 0
59	SPL-100	ERYR-60	Unknown	Erythromycin	0.035
60	SPL-101	ERYR-61	Unknown	Erythromycin	0.15
61	SPL-102	ERYR-62	Unknown	Erythromycin	0.17
62	SPL-103	ERYR-63	Unknown	Erythromycin	0.378
63	SPL-104	ERYR-64	Unknown	Erythromycin	No Peak
64	SPL-105	ERYR-65	Unknown	Erythromycin	< 0
65	SPL-106	ERYR-66	Unknown	Erythromycin	< 0
66	SPL-107	ERYR-67	Unknown	Erythromycin	0.066
67	SPL-108	ERYR-68	Unknown	Erythromycin	< 0
68	SPL-109	ERYR-69	Unknown	Erythromycin	0.325
69	SPL-110	ERYR-70	Unknown	Erythromycin	0.377
70	SPL-111	ERYR-71	Unknown	Erythromycin	< 0
71	SPL-112	ERYR-72	Unknown	Erythromycin	< 0
72	SPL-113	ERYR-73	Unknown	Erythromycin	0.037
73	SPL-114	ERYR-74	Unknown	Erythromycin	0.196
74	SPL-115	ERYR-75	Unknown	Erythromycin	0.298
75	SPL-116	ERYR-76	Unknown	Erythromycin	< 0
76	SPL-117	ERYR-77	Unknown	Erythromycin	< 0
77	SPL-118	ERYR-78	Unknown	Erythromycin	< 0
78	SPL-119	ERYR-79	Unknown	Erythromycin	0.032
79	SPL-120	ERYR-80	Unknown	Erythromycin	0.051
80	SPL-121	ERYR-81	Unknown	Erythromycin	0.109
81	SPL-122	ERYR-82	Unknown	Erythromycin	0.079
82	SPL-123	ERYR-83	Unknown	Erythromycin	0.048
83	SPL-124	ERYR-84	Unknown	Erythromycin	< 0
84	SPL-125	ERYR-85	Unknown	Erythromycin	< 0
85	SPL-126	ERYR-86	Unknown	Erythromycin	0.079
86	SPL-127	ERYR-87	Unknown	Erythromycin	< 0
87	SPL-128	ERYR-88	Unknown	Erythromycin	0.474
88	SPL-129	ERYR-89	Unknown	Erythromycin	0.454
89	SPL-130	ERYR-90	Unknown	Erythromycin	0.081
90	SPL-131	ERYR-91	Unknown	Erythromycin	0.126
91	SPL-132	ERYR-92	Unknown	Erythromycin	0.001
92	SPL-133	ERYR-93	Unknown	Erythromycin	0.037
93	SPL-134	ERYR-94	Unknown	Erythromycin	< 0
94	SPL-135	ERYR-95	Unknown	Erythromycin	0.831
95	SPL-136	ERYR-96	Unknown	Erythromycin	0.631
96	SPL-137	ERYR-97	Unknown	Erythromycin	0.044
97	SPL-138	ERYR-98	Unknown	Erythromycin	0.143
98	SPL-139	ERYR-99	Unknown	Erythromycin	0.19
99	SPL-140	ERYR-100	Unknown	Erythromycin	1.385
100	SPL-141	ERYR-101	Unknown	Erythromycin	1.349
101	SPL-142	ERYR-102	Unknown	Erythromycin	0.053
102	SPL-143	ERYR-103	Unknown	Erythromycin	0.289
103	SPL-144	ERYR-104	Unknown	Erythromycin	0.07
104	SPL-145	ERYR-105	Unknown	Erythromycin	< 0
105	SPL-146	ERYR-106	Unknown	Erythromycin	0.092
106	SPL-147	ERYR-107	Unknown	Erythromycin	1.453
107	SPL-148	ERYR-108	Unknown	Erythromycin	1.108
108	SPL-149	ERYR-109	Unknown	Erythromycin	0.069
109	SPL-150	ERYR-110	Unknown	Erythromycin	< 0
110	SPL-151	ERYR-111	Unknown	Erythromycin	< 0

## Sheet: S1g
Serial Number	Sample Name	Sample ID	Sample Type	Analyte Peak Name	Calculated Concentration (ng/mL)
1	RIF STD A	RIFR-2	Standard	Rifampicin	1.085
2	RIF STD B	RIFR-3	Standard	Rifampicin	1.704
3	RIF STD C	RIFR-4	Standard	Rifampicin	12.754
4	RIF STD D	RIFR-5	Standard	Rifampicin	24.789
5	RIF STD E	RIFR-6	Standard	Rifampicin	53.021
6	RIF STD F	RIFR-7	Standard	Rifampicin	70.217
7	RIF STD G	RIFR-8	Standard	Rifampicin	93.193
8	RIF STD H	RIFR-9	Standard	Rifampicin	89.204
9	SPL-43	RIFR-10	Unknown	Rifampicin	0.097
10	SPL-44	RIFR-11	Unknown	Rifampicin	< 0
11	SPL-45	RIFR-12	Unknown	Rifampicin	0.233
12	SPL-46	RIFR-13	Unknown	Rifampicin	0.074
13	SPL-47	RIFR-14	Unknown	Rifampicin	< 0
14	SPL-48	RIFR-15	Unknown	Rifampicin	< 0
15	SPL-49	RIFR-16	Unknown	Rifampicin	0.039
16	SPL-50	RIFR-17	Unknown	Rifampicin	0.032
17	SPL-51	RIFR-18	Unknown	Rifampicin	< 0
18	SPL-52	RIFR-19	Unknown	Rifampicin	0.084
19	SPL-53	RIFR-20	Unknown	Rifampicin	0.017
20	SPL-54	RIFR-21	Unknown	Rifampicin	0.063
21	SPL-55	RIFR-22	Unknown	Rifampicin	< 0
22	SPL-56	RIFR-23	Unknown	Rifampicin	0.178
23	SPL-57	RIFR-24	Unknown	Rifampicin	0.082
24	SPL-58	RIFR-25	Unknown	Rifampicin	0.036
25	SPL-59	RIFR-26	Unknown	Rifampicin	< 0
26	SPL-60	RIFR-27	Unknown	Rifampicin	< 0
27	SPL-61	RIFR-28	Unknown	Rifampicin	0.021
28	SPL-62	RIFR-29	Unknown	Rifampicin	< 0
29	SPL-63	RIFR-30	Unknown	Rifampicin	0.096
30	SPL-64	RIFR-31	Unknown	Rifampicin	< 0
31	SPL-65	RIFR-32	Unknown	Rifampicin	0.013
32	SPL-66	RIFR-33	Unknown	Rifampicin	< 0
33	SPL-67	RIFR-34	Unknown	Rifampicin	0.02
34	SPL-68	RIFR-35	Unknown	Rifampicin	0.02
35	SPL-69	RIFR-36	Unknown	Rifampicin	0.111
36	SPL-70	RIFR-37	Unknown	Rifampicin	< 0
37	SPL-71	RIFR-38	Unknown	Rifampicin	< 0
38	SPL-72	RIFR-39	Unknown	Rifampicin	0.155
39	SPL-73	RIFR-40	Unknown	Rifampicin	0.055
40	SPL-74	RIFR-41	Unknown	Rifampicin	< 0
41	SPL-75	RIFR-42	Unknown	Rifampicin	0.061
42	SPL-76	RIFR-43	Unknown	Rifampicin	0.032
43	SPL-77	RIFR-44	Unknown	Rifampicin	0.099
44	SPL-78	RIFR-45	Unknown	Rifampicin	0.015
45	SPL-79	RIFR-46	Unknown	Rifampicin	< 0
46	SPL-80	RIFR-47	Unknown	Rifampicin	0.291
47	SPL-81	RIFR-48	Unknown	Rifampicin	< 0
48	SPL-82	RIFR-49	Unknown	Rifampicin	< 0
49	SPL-83	RIFR-50	Unknown	Rifampicin	< 0
50	SPL-84	RIFR-51	Unknown	Rifampicin	< 0
51	SPL-85	RIFR-52	Unknown	Rifampicin	< 0
52	SPL-86	RIFR-53	Unknown	Rifampicin	0.043
53	SPL-87	RIFR-54	Unknown	Rifampicin	0.091
54	SPL-88	RIFR-55	Unknown	Rifampicin	0.126
55	SPL-89	RIFR-56	Unknown	Rifampicin	0.026
56	SPL-90	RIFR-57	Unknown	Rifampicin	0.052
57	SPL-91	RIFR-58	Unknown	Rifampicin	0.128
58	SPL-99	RIFR-59	Unknown	Rifampicin	0.188
59	SPL-100	RIFR-60	Unknown	Rifampicin	0.283
60	SPL-101	RIFR-61	Unknown	Rifampicin	0.611
61	SPL-102	RIFR-62	Unknown	Rifampicin	0.398
62	SPL-103	RIFR-63	Unknown	Rifampicin	0.15
63	SPL-104	RIFR-64	Unknown	Rifampicin	< 0
64	SPL-105	RIFR-65	Unknown	Rifampicin	< 0
65	SPL-106	RIFR-66	Unknown	Rifampicin	< 0
66	SPL-107	RIFR-67	Unknown	Rifampicin	< 0
67	SPL-108	RIFR-68	Unknown	Rifampicin	0.412
68	SPL-109	RIFR-69	Unknown	Rifampicin	0.356
69	SPL-110	RIFR-70	Unknown	Rifampicin	0.163
70	SPL-111	RIFR-71	Unknown	Rifampicin	< 0
71	SPL-112	RIFR-72	Unknown	Rifampicin	0.018
72	SPL-113	RIFR-73	Unknown	Rifampicin	0.059
73	SPL-114	RIFR-74	Unknown	Rifampicin	< 0
74	SPL-115	RIFR-75	Unknown	Rifampicin	0.09
75	SPL-116	RIFR-76	Unknown	Rifampicin	0.275
76	SPL-117	RIFR-77	Unknown	Rifampicin	< 0
77	SPL-118	RIFR-78	Unknown	Rifampicin	0.09
78	SPL-119	RIFR-79	Unknown	Rifampicin	0.048
79	SPL-120	RIFR-80	Unknown	Rifampicin	0.255
80	SPL-121	RIFR-81	Unknown	Rifampicin	0.166
81	SPL-122	RIFR-82	Unknown	Rifampicin	0.305
82	SPL-123	RIFR-83	Unknown	Rifampicin	0.044
83	SPL-124	RIFR-84	Unknown	Rifampicin	0.066
84	SPL-125	RIFR-85	Unknown	Rifampicin	< 0
85	SPL-126	RIFR-86	Unknown	Rifampicin	< 0
86	SPL-127	RIFR-87	Unknown	Rifampicin	0.168
87	SPL-128	RIFR-88	Unknown	Rifampicin	0.027
88	SPL-129	RIFR-89	Unknown	Rifampicin	0.131
89	SPL-130	RIFR-90	Unknown	Rifampicin	0.107
90	SPL-131	RIFR-91	Unknown	Rifampicin	0.045
91	SPL-132	RIFR-92	Unknown	Rifampicin	No Peak
92	SPL-133	RIFR-93	Unknown	Rifampicin	< 0
93	SPL-134	RIFR-94	Unknown	Rifampicin	0.119
94	SPL-135	RIFR-95	Unknown	Rifampicin	0.122
95	SPL-136	RIFR-96	Unknown	Rifampicin	0.155
96	SPL-137	RIFR-97	Unknown	Rifampicin	0.478
97	SPL-138	RIFR-98	Unknown	Rifampicin	< 0
98	SPL-139	RIFR-99	Unknown	Rifampicin	0.035
99	SPL-140	RIFR-100	Unknown	Rifampicin	0.065
100	SPL-141	RIFR-101	Unknown	Rifampicin	< 0
101	SPL-142	RIFR-102	Unknown	Rifampicin	< 0
102	SPL-143	RIFR-103	Unknown	Rifampicin	< 0
103	SPL-144	RIFR-104	Unknown	Rifampicin	< 0
104	SPL-145	RIFR-105	Unknown	Rifampicin	< 0
105	SPL-146	RIFR-106	Unknown	Rifampicin	No Peak
106	SPL-147	RIFR-107	Unknown	Rifampicin	No Peak
107	SPL-148	RIFR-108	Unknown	Rifampicin	< 0
108	SPL-149	RIFR-109	Unknown	Rifampicin	No Peak
109	SPL-150	RIFR-110	Unknown	Rifampicin	< 0
110	SPL-151	RIFR-111	Unknown	Rifampicin	0.081

## Sheet: S1h
Serial Number	Sample Name	Sample ID	Sample Type	Analyte Peak Name	Calculated Concentration (ng/mL)
1	MIX STD A	TETR-2	Standard	Tetracycline	5.286
2	MIX STD B	TETR-3	Standard	Tetracycline	8.974
3	MIX STD C	TETR-4	Standard	Tetracycline	60.663
4	MIX STD D	TETR-5	Standard	Tetracycline	131.949
5	MIX STD E	TETR-6	Standard	Tetracycline	255.942
6	MIX STD F	TETR-7	Standard	Tetracycline	333.457
7	MIX STD G	TETR-8	Standard	Tetracycline	433.712
8	MIX STD H	TETR-9	Standard	Tetracycline	490.486
9	SPL-43	TETR-10	Unknown	Tetracycline	37.978
10	SPL-44	TETR-11	Unknown	Tetracycline	18.152
11	SPL-45	TETR-12	Unknown	Tetracycline	10.723
12	SPL-46	TETR-13	Unknown	Tetracycline	5.998
13	SPL-47	TETR-14	Unknown	Tetracycline	3.925
14	SPL-48	TETR-15	Unknown	Tetracycline	7.265
15	SPL-49	TETR-16	Unknown	Tetracycline	4.374
16	SPL-50	TETR-17	Unknown	Tetracycline	3.79
17	SPL-51	TETR-18	Unknown	Tetracycline	1.846
18	SPL-52	TETR-19	Unknown	Tetracycline	2.083
19	SPL-53	TETR-20	Unknown	Tetracycline	4.811
20	SPL-54	TETR-21	Unknown	Tetracycline	2.719
21	SPL-55	TETR-22	Unknown	Tetracycline	3.673
22	SPL-56	TETR-23	Unknown	Tetracycline	3.596
23	SPL-57	TETR-24	Unknown	Tetracycline	4.226
24	SPL-58	TETR-25	Unknown	Tetracycline	4.536
25	SPL-59	TETR-26	Unknown	Tetracycline	3.507
26	SPL-60	TETR-27	Unknown	Tetracycline	5.785
27	SPL-61	TETR-28	Unknown	Tetracycline	2.697
28	SPL-62	TETR-29	Unknown	Tetracycline	3.714
29	SPL-63	TETR-30	Unknown	Tetracycline	3.905
30	SPL-64	TETR-31	Unknown	Tetracycline	2.481
31	SPL-65	TETR-32	Unknown	Tetracycline	3.528
32	SPL-66	TETR-33	Unknown	Tetracycline	4.268
33	SPL-67	TETR-34	Unknown	Tetracycline	2.007
34	SPL-68	TETR-35	Unknown	Tetracycline	2.363
35	SPL-69	TETR-36	Unknown	Tetracycline	3.005
36	SPL-70	TETR-37	Unknown	Tetracycline	5.528
37	SPL-71	TETR-38	Unknown	Tetracycline	7.01
38	SPL-72	TETR-39	Unknown	Tetracycline	9.361
39	SPL-73	TETR-40	Unknown	Tetracycline	1.827
40	SPL-74	TETR-41	Unknown	Tetracycline	4.11
41	SPL-75	TETR-42	Unknown	Tetracycline	4.215
42	SPL-76	TETR-43	Unknown	Tetracycline	3.145
43	SPL-77	TETR-44	Unknown	Tetracycline	2.59
44	SPL-78	TETR-45	Unknown	Tetracycline	6.329
45	SPL-79	TETR-46	Unknown	Tetracycline	5.943
46	SPL-80	TETR-47	Unknown	Tetracycline	11.233
47	SPL-81	TETR-48	Unknown	Tetracycline	3.769
48	SPL-82	TETR-49	Unknown	Tetracycline	3.436
49	SPL-83	TETR-50	Unknown	Tetracycline	1.984
50	SPL-84	TETR-51	Unknown	Tetracycline	3.097
51	SPL-85	TETR-52	Unknown	Tetracycline	7.205
52	SPL-86	TETR-53	Unknown	Tetracycline	5.584
53	SPL-87	TETR-54	Unknown	Tetracycline	3.296
54	SPL-88	TETR-55	Unknown	Tetracycline	8.548
55	SPL-89	TETR-56	Unknown	Tetracycline	3.33
56	SPL-90	TETR-57	Unknown	Tetracycline	2.144
57	SPL-91	TETR-58	Unknown	Tetracycline	2.378
58	SPL-99	TETR-59	Unknown	Tetracycline	4.063
59	SPL-100	TETR-60	Unknown	Tetracycline	3.881
60	SPL-101	TETR-61	Unknown	Tetracycline	5.474
61	SPL-102	TETR-62	Unknown	Tetracycline	3.281
62	SPL-103	TETR-63	Unknown	Tetracycline	4.716
63	SPL-104	TETR-64	Unknown	Tetracycline	3.734
64	SPL-105	TETR-65	Unknown	Tetracycline	2.84
65	SPL-106	TETR-66	Unknown	Tetracycline	4.585
66	SPL-107	TETR-67	Unknown	Tetracycline	2.804
67	SPL-108	TETR-68	Unknown	Tetracycline	5.185
68	SPL-109	TETR-69	Unknown	Tetracycline	3.887
69	SPL-110	TETR-70	Unknown	Tetracycline	5.236
70	SPL-111	TETR-71	Unknown	Tetracycline	4.546
71	SPL-112	TETR-72	Unknown	Tetracycline	2.353
72	SPL-113	TETR-73	Unknown	Tetracycline	5.315
73	SPL-114	TETR-74	Unknown	Tetracycline	5.992
74	SPL-115	TETR-75	Unknown	Tetracycline	5.884
75	SPL-116	TETR-76	Unknown	Tetracycline	4.252
76	SPL-117	TETR-77	Unknown	Tetracycline	2.726
77	SPL-118	TETR-78	Unknown	Tetracycline	4.623
78	SPL-119	TETR-79	Unknown	Tetracycline	2.828
79	SPL-120	TETR-80	Unknown	Tetracycline	7.999
80	SPL-121	TETR-81	Unknown	Tetracycline	5.442
81	SPL-122	TETR-82	Unknown	Tetracycline	4.159
82	SPL-123	TETR-83	Unknown	Tetracycline	5.106
83	SPL-124	TETR-84	Unknown	Tetracycline	5.558
84	SPL-125	TETR-85	Unknown	Tetracycline	8.45
85	SPL-126	TETR-86	Unknown	Tetracycline	5.402
86	SPL-127	TETR-87	Unknown	Tetracycline	5.833
87	SPL-128	TETR-88	Unknown	Tetracycline	4.023
88	SPL-129	TETR-89	Unknown	Tetracycline	3.722
89	SPL-130	TETR-90	Unknown	Tetracycline	4.893
90	SPL-131	TETR-91	Unknown	Tetracycline	5.558
91	SPL-132	TETR-92	Unknown	Tetracycline	6.007
92	SPL-133	TETR-93	Unknown	Tetracycline	3.265
93	SPL-134	TETR-94	Unknown	Tetracycline	7.012
94	SPL-135	TETR-95	Unknown	Tetracycline	4.659
95	SPL-136	TETR-96	Unknown	Tetracycline	3.807
96	SPL-137	TETR-97	Unknown	Tetracycline	4.742
97	SPL-138	TETR-98	Unknown	Tetracycline	4.82
98	SPL-139	TETR-99	Unknown	Tetracycline	3.007
99	SPL-140	TETR-100	Unknown	Tetracycline	3.329
100	SPL-141	TETR-101	Unknown	Tetracycline	8.832
101	SPL-142	TETR-102	Unknown	Tetracycline	4.995
102	SPL-143	TETR-103	Unknown	Tetracycline	3.139
103	SPL-144	TETR-104	Unknown	Tetracycline	3.363
104	SPL-145	TETR-105	Unknown	Tetracycline	5.587
105	SPL-146	TETR-106	Unknown	Tetracycline	3.61
106	SPL-147	TETR-107	Unknown	Tetracycline	8.455
107	SPL-148	TETR-108	Unknown	Tetracycline	3.633
108	SPL-149	TETR-109	Unknown	Tetracycline	5.377
109	SPL-150	TETR-110	Unknown	Tetracycline	2.994
110	SPL-151	TETR-111	Unknown	Tetracycline	6.659

## Sheet: S1i
Serial Number	Sample Name	Sample ID	Sample Type	Analyte Peak Name	Calculated Concentration (ng/mL)
1	SPEC STD A	SPCR-2	Standard	Spectinomycin	1.083
2	SPEC STD B	SPCR-3	Standard	Spectinomycin	1.788
3	SPEC STD C	SPCR-4	Standard	Spectinomycin	13.26
4	SPEC STD D	SPCR-5	Standard	Spectinomycin	25.428
5	SPEC STD E	SPCR-6	Standard	Spectinomycin	50.664
6	SPEC STD F	SPCR-7	Standard	Spectinomycin	65.654
7	SPEC STD G	SPCR-8	Standard	Spectinomycin	84.002
8	SPEC STD H	SPCR-9	Standard	Spectinomycin	102.515
9	SPL-43	SPCR-10	Unknown	Spectinomycin	0.336
10	SPL-44	SPCR-11	Unknown	Spectinomycin	0.696
11	SPL-45	SPCR-12	Unknown	Spectinomycin	0.757
12	SPL-46	SPCR-13	Unknown	Spectinomycin	0.61
13	SPL-47	SPCR-14	Unknown	Spectinomycin	0.283
14	SPL-48	SPCR-15	Unknown	Spectinomycin	0.912
15	SPL-49	SPCR-16	Unknown	Spectinomycin	0.716
16	SPL-50	SPCR-17	Unknown	Spectinomycin	1.019
17	SPL-51	SPCR-18	Unknown	Spectinomycin	0.578
18	SPL-52	SPCR-19	Unknown	Spectinomycin	0.503
19	SPL-53	SPCR-20	Unknown	Spectinomycin	0.694
20	SPL-54	SPCR-21	Unknown	Spectinomycin	0.265
21	SPL-55	SPCR-22	Unknown	Spectinomycin	0.793
22	SPL-56	SPCR-23	Unknown	Spectinomycin	0.617
23	SPL-57	SPCR-24	Unknown	Spectinomycin	0.539
24	SPL-58	SPCR-25	Unknown	Spectinomycin	1.149
25	SPL-59	SPCR-26	Unknown	Spectinomycin	0.606
26	SPL-60	SPCR-27	Unknown	Spectinomycin	0.537
27	SPL-61	SPCR-28	Unknown	Spectinomycin	0.714
28	SPL-62	SPCR-29	Unknown	Spectinomycin	1.004
29	SPL-63	SPCR-30	Unknown	Spectinomycin	0.948
30	SPL-64	SPCR-31	Unknown	Spectinomycin	1.013
31	SPL-65	SPCR-32	Unknown	Spectinomycin	0.909
32	SPL-66	SPCR-33	Unknown	Spectinomycin	0.801
33	SPL-67	SPCR-34	Unknown	Spectinomycin	0.823
34	SPL-68	SPCR-35	Unknown	Spectinomycin	0.396
35	SPL-69	SPCR-36	Unknown	Spectinomycin	0.834
36	SPL-70	SPCR-37	Unknown	Spectinomycin	0.74
37	SPL-71	SPCR-38	Unknown	Spectinomycin	0.766
38	SPL-72	SPCR-39	Unknown	Spectinomycin	0.823
39	SPL-73	SPCR-40	Unknown	Spectinomycin	0.845
40	SPL-74	SPCR-41	Unknown	Spectinomycin	0.798
41	SPL-75	SPCR-42	Unknown	Spectinomycin	1.028
42	SPL-76	SPCR-43	Unknown	Spectinomycin	0.963
43	SPL-77	SPCR-44	Unknown	Spectinomycin	0.81
44	SPL-78	SPCR-45	Unknown	Spectinomycin	5.343
45	SPL-79	SPCR-46	Unknown	Spectinomycin	13.951
46	SPL-80	SPCR-47	Unknown	Spectinomycin	6.909
47	SPL-81	SPCR-48	Unknown	Spectinomycin	13.599
48	SPL-82	SPCR-49	Unknown	Spectinomycin	0.248
49	SPL-83	SPCR-50	Unknown	Spectinomycin	0.282
50	SPL-84	SPCR-51	Unknown	Spectinomycin	0.764
51	SPL-85	SPCR-52	Unknown	Spectinomycin	9.713
52	SPL-86	SPCR-53	Unknown	Spectinomycin	6.562
53	SPL-87	SPCR-54	Unknown	Spectinomycin	13.242
54	SPL-88	SPCR-55	Unknown	Spectinomycin	10.039
55	SPL-89	SPCR-56	Unknown	Spectinomycin	9.694
56	SPL-90	SPCR-57	Unknown	Spectinomycin	1.053
57	SPL-91	SPCR-58	Unknown	Spectinomycin	1.598
58	SPL-99	SPCR-59	Unknown	Spectinomycin	0.281
59	SPL-100	SPCR-60	Unknown	Spectinomycin	1.035
60	SPL-101	SPCR-61	Unknown	Spectinomycin	0.934
61	SPL-102	SPCR-62	Unknown	Spectinomycin	12.575
62	SPL-103	SPCR-63	Unknown	Spectinomycin	13.156
63	SPL-104	SPCR-64	Unknown	Spectinomycin	5.019
64	SPL-105	SPCR-65	Unknown	Spectinomycin	2.621
65	SPL-106	SPCR-66	Unknown	Spectinomycin	0.913
66	SPL-107	SPCR-67	Unknown	Spectinomycin	0.909
67	SPL-108	SPCR-68	Unknown	Spectinomycin	0.958
68	SPL-109	SPCR-69	Unknown	Spectinomycin	13.61
69	SPL-110	SPCR-70	Unknown	Spectinomycin	12.216
70	SPL-111	SPCR-71	Unknown	Spectinomycin	0.879
71	SPL-112	SPCR-72	Unknown	Spectinomycin	0.967
72	SPL-113	SPCR-73	Unknown	Spectinomycin	0.815
73	SPL-114	SPCR-74	Unknown	Spectinomycin	11.215
74	SPL-115	SPCR-75	Unknown	Spectinomycin	9.504
75	SPL-116	SPCR-76	Unknown	Spectinomycin	1.02
76	SPL-117	SPCR-77	Unknown	Spectinomycin	2.064
77	SPL-118	SPCR-78	Unknown	Spectinomycin	0.991
78	SPL-119	SPCR-79	Unknown	Spectinomycin	1.008
79	SPL-120	SPCR-80	Unknown	Spectinomycin	0.935
80	SPL-121	SPCR-81	Unknown	Spectinomycin	16.519
81	SPL-122	SPCR-82	Unknown	Spectinomycin	11.083
82	SPL-123	SPCR-83	Unknown	Spectinomycin	1.026
83	SPL-124	SPCR-84	Unknown	Spectinomycin	1.031
84	SPL-125	SPCR-85	Unknown	Spectinomycin	1.308
85	SPL-126	SPCR-86	Unknown	Spectinomycin	1.106
86	SPL-127	SPCR-87	Unknown	Spectinomycin	0.845
87	SPL-128	SPCR-88	Unknown	Spectinomycin	12.612
88	SPL-129	SPCR-89	Unknown	Spectinomycin	5.919
89	SPL-130	SPCR-90	Unknown	Spectinomycin	2.58
90	SPL-131	SPCR-91	Unknown	Spectinomycin	0.665
91	SPL-132	SPCR-92	Unknown	Spectinomycin	0.904
92	SPL-133	SPCR-93	Unknown	Spectinomycin	1.14
93	SPL-134	SPCR-94	Unknown	Spectinomycin	0.766
94	SPL-135	SPCR-95	Unknown	Spectinomycin	18.711
95	SPL-136	SPCR-96	Unknown	Spectinomycin	10.823
96	SPL-137	SPCR-97	Unknown	Spectinomycin	1.28
97	SPL-138	SPCR-98	Unknown	Spectinomycin	1.243
98	SPL-139	SPCR-99	Unknown	Spectinomycin	0.272
99	SPL-140	SPCR-100	Unknown	Spectinomycin	8.819
100	SPL-141	SPCR-101	Unknown	Spectinomycin	7.466
101	SPL-142	SPCR-102	Unknown	Spectinomycin	0.83
102	SPL-143	SPCR-103	Unknown	Spectinomycin	2.899
103	SPL-144	SPCR-104	Unknown	Spectinomycin	7.184
104	SPL-145	SPCR-105	Unknown	Spectinomycin	1.283
105	SPL-146	SPCR-106	Unknown	Spectinomycin	1.031
106	SPL-147	SPCR-107	Unknown	Spectinomycin	16.968
107	SPL-148	SPCR-108	Unknown	Spectinomycin	14.3
108	SPL-149	SPCR-109	Unknown	Spectinomycin	0.823
109	SPL-150	SPCR-110	Unknown	Spectinomycin	0.664
110	SPL-151	SPCR-111	Unknown	Spectinomycin	9.414

## Sheet: S1j
Serial Number	Sample Name	Sample ID	Sample Type	Analyte Peak Name	Calculated Concentration (ng/mL)
1	PB STD A	PBR-1	Standard	Polymyxin-B	No Peak
2	PB STD B	PBR-2	Standard	Polymyxin-B	No Peak
3	PB STD C	PBR-3	Standard	Polymyxin-B	3.171
4	PB STD D	PBR-4	Standard	Polymyxin-B	6.526
5	PB STD E	PBR-5	Standard	Polymyxin-B	11.333
6	PB STD F	PBR-6	Standard	Polymyxin-B	15.812
7	PB STD G	PBR-7	Standard	Polymyxin-B	23.493
8	PB STD H	PBR-8	Standard	Polymyxin-B	25.861
9	SPL-43	PBR-9	Unknown	Polymyxin-B	< 0
10	SPL-44	PBR-10	Unknown	Polymyxin-B	No Peak
11	SPL-45	PBR-11	Unknown	Polymyxin-B	No Peak
12	SPL-46	PBR-12	Unknown	Polymyxin-B	No Peak
13	SPL-47	PBR-13	Unknown	Polymyxin-B	No Peak
14	SPL-48	PBR-14	Unknown	Polymyxin-B	< 0
15	SPL-49	PBR-15	Unknown	Polymyxin-B	< 0
16	SPL-50	PBR-16	Unknown	Polymyxin-B	No Peak
17	SPL-51	PBR-17	Unknown	Polymyxin-B	No Peak
18	SPL-52	PBR-18	Unknown	Polymyxin-B	No Peak
19	SPL-53	PBR-19	Unknown	Polymyxin-B	No Peak
20	SPL-54	PBR-20	Unknown	Polymyxin-B	No Peak
21	SPL-55	PBR-21	Unknown	Polymyxin-B	No Peak
22	SPL-56	PBR-22	Unknown	Polymyxin-B	< 0
23	SPL-57	PBR-23	Unknown	Polymyxin-B	No Peak
24	SPL-58	PBR-24	Unknown	Polymyxin-B	No Peak
25	SPL-59	PBR-25	Unknown	Polymyxin-B	No Peak
26	SPL-60	PBR-26	Unknown	Polymyxin-B	No Peak
27	SPL-61	PBR-27	Unknown	Polymyxin-B	< 0
28	SPL-62	PBR-28	Unknown	Polymyxin-B	< 0
29	SPL-63	PBR-29	Unknown	Polymyxin-B	< 0
30	SPL-64	PBR-30	Unknown	Polymyxin-B	No Peak
31	SPL-65	PBR-31	Unknown	Polymyxin-B	No Peak
32	SPL-66	PBR-32	Unknown	Polymyxin-B	< 0
33	SPL-67	PBR-33	Unknown	Polymyxin-B	No Peak
34	SPL-68	PBR-34	Unknown	Polymyxin-B	No Peak
35	SPL-69	PBR-35	Unknown	Polymyxin-B	< 0
36	SPL-70	PBR-36	Unknown	Polymyxin-B	< 0
37	SPL-71	PBR-37	Unknown	Polymyxin-B	< 0
38	SPL-72	PBR-38	Unknown	Polymyxin-B	No Peak
39	SPL-73	PBR-39	Unknown	Polymyxin-B	No Peak
40	SPL-74	PBR-40	Unknown	Polymyxin-B	< 0
41	SPL-75	PBR-41	Unknown	Polymyxin-B	No Peak
42	SPL-76	PBR-42	Unknown	Polymyxin-B	< 0
43	SPL-77	PBR-43	Unknown	Polymyxin-B	< 0
44	SPL-78	PBR-44	Unknown	Polymyxin-B	< 0
45	SPL-79	PBR-45	Unknown	Polymyxin-B	< 0
46	SPL-80	PBR-46	Unknown	Polymyxin-B	No Peak
47	SPL-81	PBR-47	Unknown	Polymyxin-B	< 0
48	SPL-82	PBR-48	Unknown	Polymyxin-B	No Peak
49	SPL-83	PBR-49	Unknown	Polymyxin-B	No Peak
50	SPL-84	PBR-50	Unknown	Polymyxin-B	< 0
51	SPL-85	PBR-51	Unknown	Polymyxin-B	< 0
52	SPL-86	PBR-52	Unknown	Polymyxin-B	< 0
53	SPL-87	PBR-53	Unknown	Polymyxin-B	No Peak
54	SPL-88	PBR-54	Unknown	Polymyxin-B	< 0
55	SPL-89	PBR-55	Unknown	Polymyxin-B	No Peak
56	SPL-90	PBR-56	Unknown	Polymyxin-B	No Peak
57	SPL-91	PBR-57	Unknown	Polymyxin-B	< 0
58	SPL-99	PBR-58	Unknown	Polymyxin-B	< 0
59	SPL-100	PBR-59	Unknown	Polymyxin-B	< 0
60	SPL-101	PBR-60	Unknown	Polymyxin-B	< 0
61	SPL-102	PBR-61	Unknown	Polymyxin-B	< 0
62	SPL-103	PBR-62	Unknown	Polymyxin-B	< 0
63	SPL-104	PBR-63	Unknown	Polymyxin-B	< 0
64	SPL-105	PBR-64	Unknown	Polymyxin-B	No Peak
65	SPL-106	PBR-65	Unknown	Polymyxin-B	No Peak
66	SPL-107	PBR-66	Unknown	Polymyxin-B	< 0
67	SPL-108	PBR-67	Unknown	Polymyxin-B	< 0
68	SPL-109	PBR-68	Unknown	Polymyxin-B	No Peak
69	SPL-110	PBR-69	Unknown	Polymyxin-B	< 0
70	SPL-111	PBR-70	Unknown	Polymyxin-B	< 0
71	SPL-112	PBR-71	Unknown	Polymyxin-B	< 0
72	SPL-113	PBR-72	Unknown	Polymyxin-B	< 0
73	SPL-114	PBR-73	Unknown	Polymyxin-B	< 0
74	SPL-115	PBR-74	Unknown	Polymyxin-B	< 0
75	SPL-116	PBR-75	Unknown	Polymyxin-B	No Peak
76	SPL-117	PBR-76	Unknown	Polymyxin-B	No Peak
77	SPL-118	PBR-77	Unknown	Polymyxin-B	< 0
78	SPL-119	PBR-78	Unknown	Polymyxin-B	No Peak
79	SPL-120	PBR-79	Unknown	Polymyxin-B	< 0
80	SPL-121	PBR-80	Unknown	Polymyxin-B	< 0
81	SPL-122	PBR-81	Unknown	Polymyxin-B	< 0
82	SPL-123	PBR-82	Unknown	Polymyxin-B	No Peak
83	SPL-124	PBR-83	Unknown	Polymyxin-B	< 0
84	SPL-125	PBR-84	Unknown	Polymyxin-B	< 0
85	SPL-126	PBR-85	Unknown	Polymyxin-B	No Peak
86	SPL-127	PBR-86	Unknown	Polymyxin-B	< 0
87	SPL-128	PBR-87	Unknown	Polymyxin-B	< 0
88	SPL-129	PBR-88	Unknown	Polymyxin-B	< 0
89	SPL-130	PBR-89	Unknown	Polymyxin-B	< 0
90	SPL-131	PBR-90	Unknown	Polymyxin-B	No Peak
91	SPL-132	PBR-91	Unknown	Polymyxin-B	< 0
92	SPL-133	PBR-92	Unknown	Polymyxin-B	No Peak
93	SPL-134	PBR-93	Unknown	Polymyxin-B	No Peak
94	SPL-135	PBR-94	Unknown	Polymyxin-B	< 0
95	SPL-136	PBR-95	Unknown	Polymyxin-B	< 0
96	SPL-137	PBR-96	Unknown	Polymyxin-B	< 0
97	SPL-138	PBR-97	Unknown	Polymyxin-B	< 0
98	SPL-139	PBR-98	Unknown	Polymyxin-B	< 0
99	SPL-140	PBR-99	Unknown	Polymyxin-B	< 0
100	SPL-141	PBR-100	Unknown	Polymyxin-B	No Peak
101	SPL-142	PBR-101	Unknown	Polymyxin-B	< 0
102	SPL-143	PBR-102	Unknown	Polymyxin-B	No Peak
103	SPL-144	PBR-103	Unknown	Polymyxin-B	< 0
104	SPL-145	PBR-104	Unknown	Polymyxin-B	< 0
105	SPL-146	PBR-105	Unknown	Polymyxin-B	< 0
106	SPL-147	PBR-106	Unknown	Polymyxin-B	No Peak
107	SPL-148	PBR-107	Unknown	Polymyxin-B	< 0
108	SPL-149	PBR-108	Unknown	Polymyxin-B	< 0
109	SPL-150	PBR-109	Unknown	Polymyxin-B	No Peak
110	SPL-151	PBR-110	Unknown	Polymyxin-B	< 0

[truncated: 1 more sheets: S1k]
