# Supplementary material for: Antibiotic Contamination and AMR Dynamics in the Urban Sewage Microbiome: Insights from a Longitudinal surveillance
Source: Research Square preprint supplement (doi:10.21203/rs.3.rs-6137541/v1), 2025-03-12
Supplement: Supplementary file 2 [file 12d3d59603bccf4c2f99bd23.xlsx]

## Sheet: S6a
Sl. No.	Organisms	Total no. of Isolates	Lab ID	Strains	Total Abx Tested	Intrinsic Resistance	Total Tested Resistance
1	Achromobacter spp.	2	KOL2S2B1	Achromobacter spp.	32	0	18
2			CG2S2B2	Achromobacter sp.	32	0	20
3	Acinetobacter baumanii	8	C22S2B2	Acinetobactor baumanii	32	3	30
4			C29S2B3	Acinetobactor baumanii	32	3	32
5			C30S2B2	Acinetobactor baumanii	32	3	31
6			C30S2B3_1	Acinetobactor baumanii	32	3	31
7			C33S6B1	Acinetobactor baumanii	32	3	28
8			C50S2B2	Acinetobactor baumanii	32	3	26
9			C30S2B3_2	Acinetobactor baumanii	32	3	31
10			UPS4B2	Acinetobactor baumanii	32	3	27
11	Aeromonas caviae	2	C27S6B3	Aeromonas caviae	32	0	29
			CG1S1AB1	Aeromonas caviae	30	0	26
12	Aeromonas simiae	3	C49S5B1	Aeromonas simiae	32	0	14
13			KOL3S3B2	Aeromonas simiae	32	0	24
14			CG3S6B2	Aeromonas simiae	32	0	15
15	Aeromonas dhakensis	1	C11S6B3	Aeromonas dhakensis	32	0	28
16	Aeromonas sp.	2	C26S6B3	Aeromonas sp.	32	0	19
17			CG1S1B1	Aeromonas sp.	32	0	16
18	Aeromonas veronii	8	C19S3B4	Aeromonas veronii	32	0	21
19			C19S4B3	Aeromonas veronii	32	0	19
20			C19S5B3	Aeromonas veronii	32	0	21
21			C19S5B4	Aeromonas veronii	32	0	26
22			C34S1B1	Aeromonas veronii	32	0	25
23			C34S3B1	Aeromonas veronii	32	0	21
24			C48S5B2	Aeromonas veronii	32	0	25
25			KOL-1AB1(3)	Aeromonas veronii	30	0	16
26	Alcaligenes sp.	4	C24S6B1	Alcaligenes sp.	32	0	25
27			C26S7B1	Alcaligenes sp.	32	0	26
28			C26S7B2	Alcaligenes sp.	32	0	28
29			C33S7B1	Alcaligenes sp.	32	0	23
30	Bacillus	1	C42S6B1	Bacillus	32	0	27
31	Bordettela trematum	1	C34S7B1	Bordettela trematum	32	0	27
32	Citrobactor freundii	6	C21S7B1	Citrobactor freundii	32	1	20
33			C22S7B1	Citrobactor freundii	32	1	23
34			C22S7B2	Citrobactor freundii	32	1	23
35			C28S6B1	Citrobactor freundii	32	1	22
36			KOL1S3B1	Citrobacter freundii	32	1	30
37			CG2S4B1	Citrobacter freundii	32	1	29
38	Citrobacter portucalensis	1	UPS3B2	Citrobacter portucalensis	32	0	25
39	Citrobactor spp.	8	C24S6B3	Citrobactor spp.	32	0	19
40			C35S4B1	Citrobactor spp.	32	0	26
41			C36S3B2	Citrobactor spp.	32	0	29
42			C36S6B1	Citrobactor spp.	32	0	28
43			C44S7B1	Citrobactor spp.	32	0	24
44			C47S1B2	Citrobactor spp.	32	0	19
45			C48S7B1	Citrobactor spp.	32	0	23
46			C41S1AB2	Citrobacter spp	30	0	25
47	Citrobacter werkmanii	18	C24S5B1	Citrobacter werkmanii	32	0	30
48			C24S4B1	Citrobacter werkmanii	32	0	20
49			C24S6B2	Citrobacter werkmanii	32	0	19
50			C26S7B3	Citrobacter werkmanii	32	0	27
51			C29S4B1	Citrobacter werkmanii	32	0	30
52			C31S3B1_1	Citrobacter werkmanii	32	0	27
53			C31S3B1_2	Citrobacter werkmanii	32	0	20
54			C34S4B1_1	Citrobacter werkmanii	32	0	25
55			C36S3B1	Citrobacter werkmanii	32	0	27
56			C36S7B1	Citrobacter werkmanii	32	0	20
57			C43S6B1	Citrobacter werkmanii	32	0	20
58			C46S2B1	Citrobacter werkmanii	32	0	17
59			C48S3B2	Citrobacter werkmanii	32	0	19
60			UPS6B3	Citrobacter werkmanii	32	0	19
61			C45S2AB3	Citrobacter werkmanii	30	0	20
62			UP1S5AB2	Citrobacter werkmanii	30	0	24
63			DEHRA_AB2	Citrobacter werkmanii	30	0	19
64			HARI_AB1	Citrobacter werkmanii	30	0	20
65	Comamonas aquatica	1	JH1S1B5	Comamonas aquatica	32	0	28
66	Enterobacter cloacae	7	C3S5B3	Enterobacter cloacae	32	1	11
67			C3S5B4	Enterobacter cloacae	32	1	9
68			C5S3B1	Enterobacter cloacae	32	1	21
69			C19S4B2	Enterobacter cloacae	32	1	30
70			C36S4B1	Enterobacter cloacae	32	1	30
71			C36S4B2	Enterobacter cloacae	32	1	30
72			GUW S5 AB2	Enterobacter cloacae	30	1	10
73	Enterobacter hormaechei	4	C42S1B1	Enterobacter hormaechei	32	0	20
74			C42S3B1	Enterobacter hormaechei	32	0	17
75			CG3S6B1	Enterobacter hormaechei	32	0	16
76			UKS2B1	Enterobacter hormaechei	32	0	28
77	Enterobacter roggenkampii	5	C7S5B2	Enterobacter roggenkampii	32	0	29
78			C8S5B2	Enterobacter roggenkampii	32	0	30
79			C12S5B2	Enterobacter roggenkampii	32	0	30
80			C48S5B4	Enterobacter roggenkampii	32	0	25
81			C49S4B1	Enterobacter roggenkampii	32	0	26
82	Enterobactor spp.	3	C13S2B1	Enterobacter spp.	32	0	19
83			C39S4B1	Enterobacter spp.	32	0	25
84			CG2S4(PURPLE)	Enterobacter spp.	32	0	29
85	Escherichia coli	213	C3S5B2	Escherichia coli	32	0	15
86			C6S3B2	Escherichia coli	32	0	24
87			C13S3B1	Escherichia coli	32	0	24
88			C19S1B2	Escherichia coli	32	0	25
89			C19S1B3	Escherichia coli	32	0	28
90			C19S3B3	Escherichia coli	32	0	25
91			C19S6B1	Escherichia coli	32	0	17
92			C20S1B2	Escherichia coli	32	0	13
93			C20S4B1	Escherichia coli	32	0	22
94			C20S4B2	Escherichia coli	32	0	14
95			C20S5B1	Escherichia coli	32	0	26
96			C21S7B2	Escherichia coli	32	0	20
97			C21S6B2	Escherichia coli	32	0	23
98			C22S1B2	Escherichia coli	32	0	23
99			C22S2B1	Escherichia coli	32	0	25
100			C22S4B1	Escherichia coli	32	0	17
101			C22S5B1	Escherichia coli	32	0	13
102			C22S6B1	Escherichia coli	32	0	31
103			C23S1B2	Escherichia coli	32	0	22
104			C23S2B3	Escherichia coli	32	0	28
105			C23S3B2	Escherichia coli	32	0	28
106			C23S4B3	Escherichia coli	32	0	27
107			C23S6B2	Escherichia coli	32	0	24
108			C23S6B3	Escherichia coli	32	0	23
109			C23S7B1	Escherichia coli	32	0	17
110			C24S2B2	Escherichia coli	32	0	27
111			C24S3B2	Escherichia coli	32	0	31
112			C24S7B3	Escherichia coli	32	0	29
113			C25S2B2	Escherichia coli	32	0	31
114			C25S3B2	Escherichia coli	32	0	30
115			C25S4B3	Escherichia coli	32	0	13
116			C26S1B1	Escherichia coli	32	0	30
117			C26S5B2	Escherichia coli	32	0	27
118			C26S6B2	Escherichia coli	32	0	29
119			C27S7B1	Escherichia coli	32	0	28
120			C28S1B1	Escherichia coli	32	0	30
121			C28S1B2	Escherichia coli	32	0	29
122			C28S1B3	Escherichia coli	32	0	30
123			C28S2B1	Escherichia coli	32	0	26
124			C28S3B2	Escherichia coli	32	0	23
125			C28S4B1	Escherichia coli	32	0	28
126			C28S4B2	Escherichia coli	32	0	25
127			C28S4B3	Escherichia coli	32	0	24
128			C28S5B1	Escherichia coli	32	0	16
129			C28S5B2	Escherichia coli	32	0	23
130			C28S6B2	Escherichia coli	32	0	28
131			C28S6B3	Escherichia coli	32	0	28
132			C29S2B1	Escherichia coli	32	0	22
133			C29S5B1	Escherichia coli	32	0	26
134			C29S6B1	Escherichia coli	32	0	28
135			C29S6B3	Escherichia coli	32	0	24
136			C30S1B2	Escherichia coli	32	0	27
137			C30S1B3	Escherichia coli	32	0	27
138			C30S3B1	Escherichia coli	32	0	31
139			C30S3B2	Escherichia coli	32	0	26
140			C30S4B2	Escherichia coli	32	0	28
141			C30S5B1	Escherichia coli	32	0	31
142			C30S6B1	Escherichia coli	32	0	31
143	Escherichia coli		C30S6B2	Escherichia coli	32	0	32
144			C31S2B1	Escherichia coli	32	0	22
145			C31S6B1	Escherichia coli	32	0	30
146			C31S7B1	Escherichia coli	32	0	26
147			C32S6B2	Escherichia coli	32	0	30
148			C33S2B1	Escherichia coli	32	0	32
149			C33S3B1	Escherichia coli	32	0	25
150			C33S6B2	Escherichia coli	32	0	32
151			C34S2B1	Escherichia coli	32	0	32
152			C34S3B2	Escherichia coli	32	0	25
153			C34S7B2	Escherichia coli	32	0	27
154			C35S1B1	Escherichia coli	32	0	26
155			C35S2B1	Escherichia coli	32	0	22
156			C35S2B2	Escherichia coli	32	0	21
157			C35S3B1	Escherichia coli	32	0	26
158			C35S3B2	Escherichia coli	32	0	29
159			C35S4B2	Escherichia coli	32	0	26
160			C35S6B2	Escherichia coli	32	0	29
161			C35S7B1	Escherichia coli	32	0	23
162			C35S7B2	Escherichia coli	32	0	29
163			C36S1B1	Escherichia coli	32	0	29
164			C36S2B1	Escherichia coli	32	0	28
165			C36S5B2	Escherichia coli	32	0	30
166			C36S6B2	Escherichia coli	32	0	23
167			C36S7B2	Escherichia coli	32	0	28
168			C37S1B1	Escherichia coli	32	0	23
169			C37S1B2	Escherichia coli	32	0	16
170			C37S2B1	Escherichia coli	32	0	17
171			C37S2B2	Escherichia coli	32	0	29
172			C37S3B2	Escherichia coli	32	0	26
173			C37S4B2	Escherichia coli	32	0	15
174			C37S6B2	Escherichia coli	32	0	24
175			C38S2B2	Escherichia coli	32	0	24
176			C38S4B2	Escherichia coli	32	0	24
177			C39S1B1	Escherichia coli	32	0	24
178			C39S1B2	Escherichia coli	32	0	27
179			C39S2B2	Escherichia coli	32	0	15
180			C39S3B2	Escherichia coli	32	0	17
181			C39S4B2	Escherichia coli	32	0	19
182			C39S5B1	Escherichia coli	32	0	26
183			C39S5B2	Escherichia coli	32	0	23
184			C39S7B1	Escherichia coli	32	0	29
185			C39S7B2	Escherichia coli	32	0	27
186			C40S1B1	Escherichia coli	32	0	29
187			C40S1B2	Escherichia coli	32	0	17
188			C40S2B2	Escherichia coli	32	0	19
189			C40S3B1	Escherichia coli	32	0	19
190			C40S3B2	Escherichia coli	32	0	19
191			C40S6B2	Escherichia coli	32	0	23
192			C40S7B1	Escherichia coli	32	0	28
193			C41S3B1	Escherichia coli	32	0	16
194			C41S4B1	Escherichia coli	32	0	27
195			C41S5B1	Escherichia coli	32	0	29
196			C41S7B1	Escherichia coli	32	0	17
197			C42S1B2	Escherichia coli	32	0	21
198			C42S2B2	Escherichia coli	32	0	17
199			C42S3B2	Escherichia coli	32	0	23
200			C42S4B2	Escherichia coli	32	0	23
201			C42S6B2	Escherichia coli	32	0	27
202			C42S7B1	Escherichia coli	32	0	25
203			C43S1B2	Escherichia coli	32	0	21
204			C43S2B1	Escherichia coli	32	0	25
205			C43S5B1_2	Escherichia coli	32	0	23
206			C43S5B1_1	Escherichia coli	32	0	17
207			C44S1B2	Escherichia coli	32	0	27
208			C44S2B1	Escherichia coli	32	0	28
209			C44S2B2	Escherichia coli	32	0	27
210			C44S3B2	Escherichia coli	32	0	24
211			C44S4B2	Escherichia coli	32	0	28
212			C44S5B2	Escherichia coli	32	0	19
213			C44S6B1	Escherichia coli	32	0	27
214			C44S6B2	Escherichia coli	32	0	25
215			C44S7B2	Escherichia coli	32	0	23
216			C45S1B2	Escherichia coli	32	0	18
217			C45S2B1	Escherichia coli	32	0	24
218			C45S4B1	Escherichia coli	32	0	26
219			C45S6B2	Escherichia coli	32	0	23
220			C45S7B1	Escherichia coli	32	0	22
221			C46S1B1	Escherichia coli	32	0	26
222			C46S1B2	Escherichia coli	32	0	26
223			C46S2B2	Escherichia coli	32	0	20
224			C46S3B3	Escherichia coli	32	0	23
225			C46S4B1	Escherichia coli	32	0	21
226			C46S4B2	Escherichia coli	32	0	27
227			C46S5B1	Escherichia coli	32	0	17
228			C46S6B2	Escherichia coli	32	0	31
229			C47S1B1	Escherichia coli	32	0	27
230			C47S2B1	Escherichia coli	32	0	17
231			C47S2B2	Escherichia coli	32	0	13
232			C47S3B2	Escherichia coli	32	0	29
233			C47S3B3	Escherichia coli	32	0	21
234			C47S4B2	Escherichia coli	32	0	16
235			C47S4B3	Escherichia coli	32	0	26
236			C47S5B1	Escherichia coli	32	0	30
237			C47S6B1	Escherichia coli	32	0	24
238			C47S6B2	Escherichia coli	32	0	24
239			C47S7B2	Escherichia coli	32	0	24
240			C48S1B1	Escherichia coli	32	0	14
241			C48S1B2	Escherichia coli	32	0	23
242			C48S6B1	Escherichia coli	32	0	26
243			C48S6B2	Escherichia coli	32	0	26
244			C49S1B1	Escherichia coli	32	0	21
245			C49S1B2	Escherichia coli	32	0	28
246			C49S1B3	Escherichia coli	32	0	24
247			C49S3B2	Escherichia coli	32	0	17
248			C49S2B1	Escherichia coli	32	0	24
249			C49S3B1	Escherichia coli	32	0	18
250			C49S6B1	Escherichia coli	32	0	23
251			C49S7B1	Escherichia coli	32	0	23
252			C49S7B2	Escherichia coli	32	0	27
253			C50S1B1	Escherichia coli	32	0	24
254			C50S1B3	Escherichia coli	32	0	26
255			C50S2B1	Escherichia coli	32	0	32
256			C50S2B3	Escherichia coli	32	0	27
257			C50S4B1	Escherichia coli	32	0	20
258			C50S4B2	Escherichia coli	32	0	24
259			C50S5B2	Escherichia coli	32	0	24
260			C50S6B1	Escherichia coli	32	0	29
261			C50S6B2	Escherichia coli	32	0	31
262			C50S7B1	Escherichia coli	32	0	23
263			C50S7B2	Escherichia coli	32	0	25
264			C50S7B3	Escherichia coli	32	0	28
265			KOL1S1B2	Escherichia coli	32	0	28
266			KOL1S1B3	Escherichia coli	32	0	26
267			KOL1S2B2	Escherichia coli	32	0	22
268			KOL2S2B3	Escherichia coli	32	0	28
269			KOL3S3B1	Escherichia coli	32	0	20
270			JH1S1B2	Escherichia coli	32	0	16
271			JH1S2B2	Escherichia coli	32	0	24
272			JH1S8B1	Escherichia coli	32	0	26
273			CG1S1B2	Escherichia coli	32	0	25
274			CG1S1B3	Escherichia coli	32	0	26
275			CG2S3B3(RED)	Escherichia coli	32	0	20
276			CG2S4B1(LP)	Escherichia coli	32	0	32
277			CG2S4(RED)	Escherichia coli	32	0	19
278			CG3S5B1	Escherichia coli	32	0	21
279			CG3S5B3	Escherichia coli	32	0	21
280			CG3S7B1	Escherichia coli	32	0	15
281			UPS1B1	Escherichia coli	32	0	27
282			UPS2B4	Escherichia coli	32	0	26
283			UPS3B1	Escherichia coli	32	0	29
284			UPS5B1	Escherichia coli	32	0	22
285			UPS5B2(LP)	Escherichia coli	32	0	25
286			UPS6B2	Escherichia coli	32	0	29
287			UPS7B2	Escherichia coli	32	0	18
288			UPS9B2	Escherichia coli	32	0	21
289			UPS10B1	Escherichia coli	32	0	20
290			UKS3B1	Escherichia coli	32	0	25
291			UKS3B2	Escherichia coli	32	0	19
292			UKS3B3	Escherichia coli	32	0	26
293			UKS1B1	Escherichia coli	32	0	27
294			DEHRA_AB1	Escherichia coli	30	0	26
295			CG3S4AB1	Escherichia coli	30	0	28
296			C41S6AB1	Escherichia coli	30	0	27
297			C49S6AB1	Escherichia coli	30	0	26
298	Klebsiella michiganensis	3	C49S6B2	Klebsiella michiganensis	32	0	27
299			JH1S2B1	Klebsiella michiganensis	32	0	21
300			UPS5B2(P)	Klebsiella michiganensis	32	0	27
301	Klebsiella pneumoniae	69	C3S5B1	Klebsiella pneumoniae	32	1	14
302			C19S2B2	Klebsiella pneumoniae	32	1	20
303			C19S5B1	Klebsiella pneumoniae	32	1	23
304			C19S6B2	Klebsiella pneumoniae	32	1	27
305			C20S2B2	Klebsiella pneumoniae	32	1	25
306			C20S3B2	Klebsiella pneumoniae	32	1	27
307			C21S1B1	Klebsiella pneumoniae	32	1	25
308			C22S3B1	Klebsiella pneumoniae	32	1	24
309			C23S2B2	Klebsiella pneumoniae	32	1	28
310			C24S2B1	Klebsiella pneumoniae	32	1	25
311			C25S4B2	Klebsiella pneumoniae	32	1	31
312			C25S5B2	Klebsiella pneumoniae	32	1	21
313			C25S6B2	Klebsiella pneumoniae	32	1	29
314			C26S2B1	Klebsiella pneumoniae	32	1	28
315			C27S5B3	Klebsiella pneumoniae	32	1	31
316			C28S2B2	Klebsiella pneumoniae	32	1	23
317			C28S2B3	Klebsiella pneumoniae	32	1	19
318			C29S2B2	Klebsiella pneumoniae	32	1	28
319			C29S3B1	Klebsiella pneumoniae	32	1	23
320			C29S4B2	Klebsiella pneumoniae	32	1	20
321			C30S2B1	Klebsiella pneumoniae	32	1	20
322			C31S3B2	Klebsiella pneumoniae	32	1	31
323			C31S4B1	Klebsiella pneumoniae	32	1	29
324			C31S5B1	Klebsiella pneumoniae	32	1	24
325			C31S5B2	Klebsiella pneumoniae	32	1	21
326			C32S4B2	Klebsiella pneumoniae	32	1	29
327			C33S2B2	Klebsiella pneumoniae	32	1	24
328			C33S5B2	Klebsiella pneumoniae	32	1	27
329			C34S5B1	Klebsiella pneumoniae	32	1	30
330			C34S6B2	Klebsiella pneumoniae	32	1	28
331			C35S5B1	Klebsiella pneumoniae	32	1	31
332			C35S5B2	Klebsiella pneumoniae	32	1	30
333			C37S3B1	Klebsiella pneumoniae	32	1	28
334			C37S4B1	Klebsiella pneumoniae	32	1	26
335			C37S5B2	Klebsiella pneumoniae	32	1	29
336			C39S2B1	Klebsiella pneumoniae	32	1	28
337			C39S3B1	Klebsiella pneumoniae	32	1	26
338			C39S6B1	Klebsiella pneumoniae	32	1	30
339			C40S5B1	Klebsiella pneumoniae	32	1	30
340			C40S6B1	Klebsiella pneumoniae	32	1	27
341			C41S2B2	Klebsiella pneumoniae	32	1	20
342			C41S3B2	Klebsiella pneumoniae	32	1	27
343			C41S6B1	Klebsiella pneumoniae	32	1	19
344			C43S1B1	Klebsiella pneumoniae	32	1	21
345			C43S2B2	Klebsiella pneumoniae	32	1	27
346	Klebsiella pneumoniae		C43S3B1	Klebsiella pneumoniae	32	1	19
347			C43S5B2	Klebsiella pneumoniae	32	1	25
348			C44S1B1	Klebsiella pneumoniae	32	1	26
349			C44S4B1	Klebsiella pneumoniae	32	1	28
350			C44S5B1	Klebsiella pneumoniae	32	1	27
351			C45S1B1	Klebsiella pneumoniae	32	1	29
352			C45S3B2	Klebsiella pneumoniae	32	1	25
353			C45S5B1	Klebsiella pneumoniae	32	1	19
354			C45S6B1	Klebsiella pneumoniae	32	1	29
355			C46S4B3	Klebsiella pneumoniae	32	1	19
356			C48S4B2	Klebsiella pneumoniae	32	1	26
357			C49S4B2	Klebsiella pneumoniae	32	1	23
358			C49S5B2	Klebsiella pneumoniae	32	1	21
359			C49S5B3	Klebsiella pneumoniae	32	1	20
360			C50S5B1	Klebsiella pneumoniae	32	1	29
361			UPS4B4	Klebsiella pneumoniae	32	1	24
362			UPS7B1	Klebsiella pneumoniae	32	1	26
363			UPS9B1	Klebsiella pneumoniae	32	1	28
364			UPS9B4	Klebsiella pneumoniae	32	1	18
365			UPS10B2	Klebsiella pneumoniae	32	1	27
366			UKS2B2	Klebsiella pneumoniae	32	1	27
367			UKS2B3	Klebsiella pneumoniae	32	1	26
368			UKS1B2	Klebsiella pneumoniae	32	1	29
369			C35S2AB1	Klebsiella pneumoniae	30	1	30
370	Klebsiella quasipneumoniae	6	C19S3B1	Klebsiella quasipneumoniae	32	0	22
371			C26S3B2	Klebsiella quasipneumoniae	32	0	21
372			C26S5B3	Klebsiella quasipneumoniae	32	0	30
373			C28S3B1	Klebsiella quasipneumoniae	32	0	24
374			C40S4B2	Klebsiella quasipneumoniae	32	0	29
375			C50S4B3	Klebsiella quasipneumoniae	32	0	21
376	Lysinibacillus fusiformis	9	C37S5B1	Lysinibacillus fusiformis	32	0	27
377			C37S6B1	Lysinibacillus fusiformis	32	0	29
378			C38S1B2	Lysinibacillus fusiformis	32	0	24
379			C38S2B1	Lysinibacillus fusiformis	32	0	21
380			C38S3B2	Lysinibacillus fusiformis	32	0	27
381			C38S5B1	Lysinibacillus fusiformis	32	0	25
382			C38S5B2	Lysinibacillus fusiformis	32	0	25
383			C38S7B2	Lysinibacillus fusiformis	32	0	21
384			C47S3B1	Lysinibacillus fusiformis	32	0	21
385	Morganella morganii	106	C2S1B1	Morganella morganii	32	3	18
386			C2S3B1	Morganella morganii	32	3	18
387			C2S4B1	Morganella morganii	32	3	19
388			C4S2B1	Morganella morganii	32	3	16
389			C7S4B1	Morganella morganii	32	3	23
390			C8S6B1	Morganella morganii	32	3	19
391			C10S3B1	Morganella morganii	32	3	15
392			C10S4B1	Morganella morganii	32	3	26
393			C10S6B1	Morganella morganii	32	3	23
394			C10S7B1	Morganella morganii	32	3	23
395			C11S1B1	Morganella morganii	32	3	26
396			C11S3B1	Morganella morganii	32	3	16
397			C11S4B1	Morganella morganii	32	3	20
398			C11S5B1	Morganella morganii	32	3	19
399			C11S6B1	Morganella morganii	32	3	20
400			C11S7B1	Morganella morganii	32	3	24
401			C13S1B1	Morganella morganii	32	3	25
402			C13S3B3	Morganella morganii	32	3	23
403			C13S4B2	Morganella morganii	32	3	20
404			C13S5B1	Morganella morganii	32	3	19
405			C14S2B1	Morganella morganii	32	3	25
406			C14S3B1	Morganella morganii	32	3	17
407			C14S5B1	Morganella morganii	32	3	16
408			C15S1B1	Morganella morganii	32	3	23
409			C15S3B1	Morganella morganii	32	3	19
410			C15S7B1	Morganella morganii	32	3	24
411			C15S9B3	Morganella morganii	32	3	28
412			C16S1B1	Morganella morganii	32	3	16
413			C16S2B2	Morganella morganii	32	3	21
414			C17S5B1	Morganella morganii	32	3	28
415			C18S3B1	Morganella morganii	32	3	25
416			C18S6B1	Morgenella morganii	32	3	22
417			C19S1B1	Morgenella morganii	32	3	19
418			C19S3B2	Morgenella morganii	32	3	22
419			C19S4B1	Morgenella morganii	32	3	28
420			C19S5B2	Morgenella morganii	32	3	23
421			C19S7B1	Morganella morganii	32	3	22
422			C19S7B2	Morganella morganii	32	3	22
423			C20S3B3	Morganella morganii	32	3	21
424			C22S1B1	Morganella morganii	32	3	16
425			C23S1B1	Morganella morganii	32	3	19
426			C23S2B1	Morganella morganii	32	3	21
427			C23S4B1	Morganella morganii	32	3	24
428			C23S4B2	Morganella morganii	32	3	30
429			C23S5B3	Morganella morganii	32	3	13
430			C23S6B1	Morganella morganii	32	3	29
431			C24S1B1	Morganella morganii	32	3	17
432			C24S7B2	Morganella morganii	32	3	18
433			C25S1B1	Morganella morganii	32	3	26
434			C25S2B1	Morganella morganii	32	3	20
435			C25S4B1	Morganella morganii	32	3	17
436			C25S5B1	Morganella morganii	32	3	17
437			C25S6B1	Morganella morganii	32	3	28
438			C26S4B1	Morganella morganii	32	3	17
439			C26S5B1	Morganella morganii	32	3	21
440			C26S6B1	Morganella morganii	32	3	20
441			C27S6B1	Morganella morganii	32	3	25
442			C29S1B1	Morganella morganii	32	3	17
443			C29S1B2	Morganella morganii	32	3	20
444			C29S4B3	Morganella morganii	32	3	23
445			C30S1B1	Morganella morganii	32	3	26
446			C31S1B1	Morganella morganii	32	3	21
447			C32S5B1	Morganella morganii	32	3	30
448			C32S5B2	Morganella morganii	32	3	29
449			C32S6B1	Morganella morganii	32	3	27
450			C33S5B1	Morganella morganii	32	3	26
451			C38S1B1	Morganella morganii	32	3	19
452			C38S4B1	Morganella morganii	32	3	20
453			C38S7B1	Morganella morganii	32	3	27
454			C40S2B1	Morganella morganii	32	3	20
455			C40S4B1	Morganella morganii	32	3	19
456			C40S5B2	Morganella morganii	32	3	22
457			C41S1B1	Morganella morganii	32	3	30
458			C41S1B2	Morganella morganii	32	3	23
459			C41S4B2	Morganella morganii	32	3	21
460			C44S3B1	Morganella morganii	32	3	25
461			C46S3B1	Morganella morganii	32	3	29
462			C46S5B2(P)	Morganella morganii	32	3	20
463			C47S4B1	Morganella morganii	32	3	12
464			C48S1B3	Morganella morganii	32	3	17
465			C48S2B3	Morganella morganii	32	3	22
466			C48S4B1	Morganella morganii	32	3	14
467			C48S4B3	Morganella morganii	32	3	20
468			C48S4B4	Morganella morganii	32	3	15
469			C48S5B1	Morganella morganii	32	3	28
470			C48S5B3	Morganella morganii	32	3	10
471			C49S2B3_1	Morganella morganii	32	3	15
472			C49S2B3_2	Morganella morganii	32	3	22
473			C49S7B3	Morganella morganii	32	3	23
474			C50S1B2	Morganella morganii	32	3	18
475			C50S6B3	Morganella morganii	32	3	14
476			HR1S1B1	Morganella morganii	32	3	22
477			CG3S7B2	Morganella morganii	32	3	20
478			UPS2B1	Morganella morganii	32	3	26
479			UPS2B2	Morganella morganii	32	3	17
480			UPS2B3	Morgenella morganii	32	3	26
481			UPS4B3	Morgenella morganii	32	3	19
482			UP1S6AB2	Morganella morganii	30	3	21
483			C10S5AB1	Morganella morganii	30	3	22
484			C10S7AB1	Morganella morganii	30	3	25
485			C11S2AB1	Morganella morganii	30	3	29
486			C14S6AB1	Morganella morganii	30	3	19
487			C12S2AB1	Morganella morganii	30	3	25
488			C12S4AB1_1	Morganella morganii	30	3	20
489			C12S4AB1_2	Morganella morganii	30	3	20
490			C14S1AB1	Morganella morganii	30	3	22
491	Morganella spp.	1	C46S3B2	Morganella spp.	32	0	24
492	Proteus mirabilis	33	C1S1B1	Proteus mirabilis	32	3	20
493			C1S1B2	Proteus mirabilis	32	3	24
494			C1S3B1	Proteus mirabilis	32	3	23
495			C1S4B1	Proteus mirabilis	32	3	29
496			C1S5B2	Proteus mirabilis	32	3	23
497			C1S5B3	Proteus mirabilis	32	3	26
498			C11S3B2	Proteus mirabilis	32	3	24
499			C19S6B3	Proteus mirabilis	32	3	23
500			C20S3B1	Proteus mirabilis	32	3	23
501			C21S5B2	Proteus mirabilis	32	3	21
502			C21S5B1	Proteus mirabilis	32	3	27
503			C29S6B2	Proteus mirabilis	32	3	29
504			C33S1B1	Proteus mirabilis	32	3	26
505			C42S4B1	Proteus mirabilis	32	3	23
506			C42S5B1	Proteus mirabilis	32	3	25
507			C42S5B2	Proteus mirabilis	32	3	15
508			C46S6B1	Proteus mirabilis	32	3	27
509			C47S6B3	Proteus mirabilis	32	3	20
510			C48S2B1	Proteus mirabilis	32	3	21
511			C48S2B2	Proteus mirabilis	32	3	24
512			JH1S1B1	Proteus mirabilis	32	3	17
513			JH1S1B3	Proteus mirabilis	32	3	11
514			UPS3B3	Proteus mirabilis	32	3	29
515			C15S2AB1	Proteus mirabilis	30	3	22
516			C15S9AB1	Proteus mirabilis	30	3	25
517			C45S3AB3	Proteus mirabilis	30	3	26
518			C45S6AB2	Proteus mirabilis	30	3	17
519			UP1S4AB1	Proteus mirabilis	30	3	23
520			UP1S3AB1	Proteus mirabilis	30	3	25
521			C42S2AB1_1	Proteus mirabilis	30	3	29
522			C42S2AB1_2	Proteus mirabilis	30	3	29
523			C37S1AB1	Proteus mirabilis	30	3	20
524			C11S6AB2	Proteus mirabilis	30	3	30
525	Proteus penneri	1	UPS8B1	Proteus penneri	32	4	22
526	Proteus vulgaris	2	C24S7B1	Proteus vulgaris	32	4	21
527			RISHI_AB1	Proteus vulgaris	30	4	15
528	Providencia alcalifaciens	5	C1S2B1	Providencia alcalifaciens	32	0	16
529			C5S5B1	Providencia alcalifaciens	32	0	17
530			C9S3B1	Providencia alcalifaciens	32	0	15
531			C16S3B1	Providencia alcalifaciens	32	0	23
532			C16S3B2	Providencia alcalifaciens	32	0	24
533	Providencia manganoxydans	15	C5S1B1	Providencia manganoxydans	32	0	19
534			C6S4B1	Providencia manganoxydans	32	0	26
535			C7S6B1	Providencia manganoxydans	32	0	25
536			C8S5B1	Providencia manganoxydans	32	0	22
537			C9S2B1	Providencia manganoxydans	32	0	20
538			C9S5B2	Providencia manganoxydans	32	0	24
539			C10S4B2	Providencia manganoxydans	32	0	22
540			C11S4B2	Providencia manganoxydans	32	0	30
541			C11S5B2	Providencia manganoxydans	32	0	29
542			C11S7B2	Providencia manganoxydans	32	0	22
543			C12S2B2	Providencia manganoxydans	32	0	19
544			C12S3B1	Providencia manganoxydans	32	0	20
545			C15S3B3	Providencia manganoxydans	32	0	21
546			C16S5B2	Providencia manganoxydans	32	0	21
547			C17S3B2	Providencia manganoxydans	32	0	24
548	Providencia rettgeri	32	C1S3B2	Providencia rettgeri	32	4	18
549			C2S2B1	Providencia rettgeri	32	4	21
550			C5S3B2	Providencia rettgeri	32	4	24
551			C9S5B1	Providencia rettgeri	32	4	21
552			C12S2B1	Provedencia rettgeri	32	4	23
553			C12S4B1	Providencia rettgeri	32	4	17
554			C12S5B1	Providencia rettgeri	32	4	26
555			C12S5B3	Providencia rettgeri	32	4	20
556			C13S4B1	Providencia rettgeri	32	4	25
557			C16S5B1	Providencia rettgeri	32	4	24
558			C16S6B1	Providencia rettgeri	32	4	25
559			C23S3B1	Providencia rettgeri	32	4	17
560			C24S1B2	Providencia rettgeri	32	4	21
561			C24S4B2	Providencia rettgeri	32	4	20
562			C25S3B1	Providencia rettgeri	32	4	21
563			C26S3B1	Providencia rettgeri	32	4	21
564			C30S4B1	Providencia rettgeri	32	4	24
565			C30S5B2	Providencia rettgeri	32	4	26
566			C31S4B2	Providencia rettgeri	32	4	32
567			C32S3B2	Providencia rettgeri	32	4	29
568			C33S4B1	Providencia rettgeri	32	4	26
569			C34S4B1_2	Providencia rettgeri	32	4	27
570			C35S6B1	Providencia rettgeri	32	4	24
571			C38S3B1	Providencia rettgeri	32	4	21
572			C43S4B1	Providencia rettgeri	32	4	24
573			C48S3B1	Providencia rettgeri	32	4	24
574			C49S2B2	Providencia rettgeri	32	4	27
575			C49S3B3	Providencia rettgeri	32	4	25
576			C49S5B4	Providencia rettgeri	32	4	18
577			C50S3B1	Providencia rettgeri	32	4	23
578			C50S3B2	Providencia rettgeri	32	4	24
579			C50S3B3	Providencia rettgeri	32	4	22
580	Providencia spp.	20	C1S4B2	Providencia spp.	32	0	21
581			C2S5B1	Providencia spp.	32	0	22
582			C4S4B1	Providencia spp.	32	0	21
583			C11S1B2	Providencia spp.	32	0	25
584			C14S6B1	Providencia spp.	32	0	21
585			C15S6B1	Providencia spp.	32	0	26
586			C15S9B1	Providencia spp.	32	0	30
587			C15S9B2	Providencia spp.	32	0	30
588			C16S3B3	Providencia spp.	32	0	25
589			C16S6B2	Providencia spp.	32	0	26
590			C16S6B3	Providencia spp.	32	0	21
591			C17S1B2	Providencia spp.	32	0	24
592			C17S3B1	Providencia spp.	32	0	22
593			C17S6B1	Providencia spp.	32	0	24
594			C17S6B2	Providencia spp.	32	0	27
595			C24S3B1	Providencia spp.	32	0	23
596			C32S2B1	Providencia spp.	32	0	23
597			C32S3B1	Providencia spp.	32	0	24
598			C32S4B1	Providencia spp.	32	0	21
599			C42S2B1	Providencia spp.	32	0	28
600	Providencia stuartii	14	C1S5B1	Providencia stuartii	32	4	17
601			C4S1B1	Providencia stuartii	32	4	29
602			C4S3B1	Providencia stuartii	32	4	19
603			C4S5B1	Providencia stuartii	32	4	18
604			C5S2B1	Providencia stuartii	32	4	15
605			C5S4B1	Providencia stuartii	32	4	20
606			C8S4B1	Providencia stuartii	32	4	21
607			C9S1B1	Providencia stuartii	32	4	18
608			C11S6B2	Providencia stuartii	32	4	29
609			C14S4B1	Providencia stuartii	32	4	21
610			C14S4B2	Providencia stuartii	32	4	30
611			C15S8B1	Providencia stuartii	32	4	30
612			C16S1B2	Providencia stuartii	32	4	21
613			C41S5B2	Providencia stuartii	32	4	27
614	Providencia vermicola	27	C2S1B2	Providencia vermicola	32	0	16
615			C2S4B2	Providencia vermicola	32	0	23
616			C4S4B2	Providencia vermicola	32	0	22
617			C6S3B1	Providencia vermicola	32	0	29
618			C7S5B1	Providencia vermicola	32	0	22
619			C10S5B1	Providencia vermicola	32	0	20
620			C12S1B1	Providencia vermicola	32	0	18
621			C12S3B2	Providencia vermicola	32	0	21
622			C13S3B2	Providencia vermicola	32	0	24
623			C14S1B1	Providencia vermicola	32	0	23
624			C14S3B2	Providencia vermicola	32	0	25
625			C14S5B2	Providencia vermicola	32	0	21
626			C14S6B2	Providencia vermicola	32	0	18
627			C15S2B1	Providencia vermicola	32	0	21
628			C15S3B2	Providencia vermicola	32	0	21
629			C15S4B1	Providencia vermicola	32	0	27
630			C16S1B3	Providencia vermicola	32	0	23
631			C16S2B1	Providencia vermicola	32	0	23
632			C16S5B3	Providencia vermicola	32	0	26
633			C17S1B1	Providencia vermicola	32	0	20
634			C17S5B2	Providencia vermicola	32	0	20
635			C17S7B1	Providencia vermicola	32	0	21
636			C18S1B1	Providencia vermicola	32	0	30
637			C18S3B2	Providencia vermicola	32	0	20
638			C18S5B1	Providencia vermicola	32	0	23
639			C18S6B2	Providencia vermicola	32	0	21
640			C50S6B4	Providencia vermicola	32	0	14
641	Pseudomonas aeruginosa	8	C20S2B1	Pseudomonas aeruginosa	32	4	32
642			C23S5B1	Pseudomonas aeruginosa	32	4	13
643			C23S5B2	Pseudomonas aeruginosa	32	4	31
644			C24S5B2	Pseudomonas aeruginosa	32	4	29
645			C39S5B3	Pseudomonas aeruginosa	32	4	23
646			C39S6B2	Pseudomonas aeruginosa	32	4	24
647			C41S2B1	Pseudomonas aeruginosa	32	4	26
648			C43S5B3	Pseudomonas aeruginosa	32	4	23
649	Pseudomonas putida	6	C22S6B2	Pseudomonas putida	32	0	27
650			C29S7B1	Pseudomonas putida	32	0	32
651			KOL1S1B1	Pseudomonas putida	32	0	25
652			KOL1S3B2	Pseudomonas putida	32	0	21
653			KOL1S3B3	Pseudomonas putida	32	0	31
654			JH1S10B1	Pseudomonas putida	32	0	26
655	Pseudomonas spp.	4	C31S6B2	Pseudomonas spp.	32	0	27
656			KOL1S2B1	Pseudomonas spp.	32	0	31
657			CG3S1B1	Pseudomonas spp.	32	0	20
658			CG3S2B1	Pseudomonas spp.	32	0	24
659	Staphylococcus hominis	1	CG3S8B1	Staphylococcus hominis	32	0	14
660	Enterococcus faecium	20	CG2S1AB1	Enterococcus faecium	32	1	30
661			C26S5AB1	Enterococcus faecium	32	1	31
662			C25S4AB2	Enterococcus faecium	32	1	30
663			C25S2AB2	Enterococcus faecium	32	1	29
664			C16S1AB1	Enterococcus faecium	32	1	30
665			CG3S6AB1	Enterococcus faecium	32	1	30
666			C26S2AB1	Enterococcus faecium	32	1	31
667			C26S7AB1	Enterococcus faecium	32	1	29
668			JHS3AB2	Enterococcus faecium	32	1	27
669			C11S4AB1	Enterococcus faecium	32	1	31
670			C11S3AB1	Enterococcus faecium	32	1	28
671			C10S6AB2	Enterococcus faecium	32	1	29
672			C11S5AB1	Enterococcus faecium	32	1	30
673			C10S7AB2	Enterococcus faecium	32	1	29
674			C10S1AB2	Enterococcus faecium	32	1	28
675			C10S2AB1	Enterococcus faecium	32	1	32
676			C14S7AB2	Enterococcus faecium	32	1	27
677			C12S1AB1	Enterococcus faecium	32	1	29
678			C12S3AB1	Enterococcus faecium	32	1	30
679			C12S4AB2	Enterococcus faecium	32	1	29
680	Enterococcus raffinosus	1	C25S1AB1	Enterococcus raffinosus	30	0	24

## Sheet: S6b
Organism	Ampicillin (10µg)	Azithromycin (15µg)	Chlorampheniol (30µg)	Carbenicillin (100µg)	Colistin sulfate(10µg)	Ciprofloxacin(5µg)	Doxycycline(30µg)	Erythromycin (15µg)	Furazolidon (50µg)	Gentamycin10µg)	Imipenem (10µg)	Kanamycin (30µg)	Nalidixic acid(30µg)	Neomycin (30µg)	Norfloxacin (10µg)	Penicillin G (10 IU)	Polymyxin B (300 IU)	Rifampicin (30µg)	Streptomycin (10µg)	Spectinomycin (100µg)	Trimethoprim/Sulfamethoxazole (25µg)	Tetracyclin (30µg)	Cefoperazone (75µg)	Meropenem (10µg)	Cefpodoxime (10µg)	Ertapenem (10µg)	Aztreonam (30µg)	Cefepime (30 µg)	Ceftazidime (30 µg)	Cefotaxime (30 µg)	Ceftriaxone (30 µg)	Cefixime ( 5 µg)
Aeromonas veronii (n=8)	8 (100%)	5 (62.5%)	0	8 (100%)	8 (100%)	8 (100%)	4 (50%)	5/8(71.42%)	8 (100%)	6 (75%)	8 (100%)	6 (75%)	8 (100%)	6 (75%)	6 (75%)	7/7 (100%)	6 (75%)	4 (50%)	8 (100%)	8 (100%)	8 (100%)	3 (37.5%)	5 (62.5%)	0	6 (75%)	4 (50%)	2(25%)	3 (37.5%)	4 (50%)	3 (37.5%)	5 (62.5%)	4 (50%)
Acinetobactor baumanii (n=8)	8 (100%)	7 (87.5%)	8 (100%)	8 (100%)	8 (100%)	7 (87.5%)	7 (87.5%)	8 (100%)	8 (100%)	8 (100%)	6 (75%)	7 (87.5%)	7 (87.5%)	7 (87.5%)	7 (87.5%)	8 (100%)	7 (87.5%)	2 (25%)	8 (100%)	6 (75%)	8 (100%)	7 (87.5%)	8 (100%)	8 (100%)	8 (100%)	7 (87.5%)	8 (100%)	8 (100%)	8 (100%)	8 (100%)	8 (100%)	8 (100%)
Citrobactor freundii (n=6)	6 (100%)	6 (100%)	3 (50%)	6 (100%)	6 (100%)	6 (100%)	5 (83.33%)	6 (100%)	5 (83.33%)	6 (100%)	4 (66.66%)	5 (83.33%)	6 (100%)	6 (100%)	5 (83.33%)	6 (100%)	6 (100%)	2 (33.33%)	6 (100%)	3 (50%)	6 (100%)	5 (83.33%)	4 (66.66%)	2 (33.33%)	6 (100%)	2 (33.33%)	2 (33.33%)	4 (66.66%)	2 (33.33%)	5 (83.33%)	5 (83.33%)	0
Citrobactor spp.(n=8)	8 (100%)	8(100%)	4(50%)	8 (100%)	8(100%)	8(100%)	8 (100%)	8(100%)	8(100%)	5(62.50%)	5(62.50%)	7 (87.50%)	8 (100%)	8 (100%)	6(75.00%)	8(100%)	8 (100%)	3 (37.50%)	8(100%)	6(75.00%)	6(75.00%)	8(100%)	3 (37.50%)	0	7 (87.50%)	2(25.00%)	3 (37.50%)	2(25.00%)	4(50%)	5(62.50%)	4(50%)	3 (37.50%)
Citrobacter werkmanii (n=18)	18 (100%)	17 (94.44%)	9(50%)	18 (100%)	18 (100%)	18 (100%)	15(83.33%)	13/14(92.8%)	18 (100%)	13(72.22%)	12 (66.66%)	18(88.88%)	18 (100%)	18 (100%)	15(83.33%)	14/14 (100%)	18 (100%)	3(16.66%)	18 (100%)	16 (88.88%)	14 (77.77%)	18 (100%)	6(33.33%)	1(5.55%)	12(66.66%)	2(11.11%)	6(33.33%)	9(50%)	9(50%)	8(44.44%)	7(38.88%)	6(33.33%)
Enterobacter cloacae (n=7)	7 (100%)	5 (71.42%)	4 (57.14%)	6 (85.71%)	7 (100%)	4 (57.14%)	4 (57.14%)	7 (100%)	7 (100%)	5 (71.42%)	6 (85.71%)	5 (71.42%)	4 (57.14%)	7 (100%)	4 (57.14%)	7 (100%)	7 (100%)	2 (42.85%)	4 (57.14%)	2 (28.57%)	4 (57.14%)	3 (42.85%)	3 (42.85%)	3 (42.85%)	4 (57.14%)	3 (42.85%)	2 (28.57%)	3 (42.85%)	3 (42.85%)	4 (57.14%)	4 (57.14%)	3 (42.85%)
Enterobacter spp. (n=3)	3 (100%)	3 (100%)	2 (66.66%)	2 (66.66%)	3 (100%)	3 (100%)	3 (100%)	3 (100%)	3 (100%)	3 (100%)	3 (100%)	3 (100%)	3 (100%)	3 (100%)	3 (100%)	3 (100%)	3 (100%)	1 (33.33%)	3 (100%)	3 (100%)	3 (100%)	3 (100%)	1 (33.33%)	0	1 (33.33%)	1 (33.33%)	2 (66.66%)	1 (33.33%)	2 (66.66%)	1 (33.33%)	1 (33.33%)	1 (33.33%)
Enterobacter hormaechei (n=4)	3(75%)	2(50%)	2(50%)	3(75%)	4 (100%)	3(75%)	3(75%)	3(75%)	4 (100%)	2(50%)	2(50%)	3(75%)	3(75%)	3(75%)	3(75%)	4 (100%)	4 (100%)	1 (25%)	3(75%)	2(50%)	3(75%)	3(75%)	2(50%)	0	2(50%)	1 (25%)	2(50%)	2(50%)	2(50%)	2(50%)	2(50%)	2(50%)
Enterobacter roggenkampii (n=5)	5 (100%)	5 (100%)	5 (100%)	5 (100%)	5 (100%)	5 (100%)	5 (100%)	5 (100%)	5 (100%)	3 (60%)	3 (60%)	5 (100%)	5 (100%)	4 (80%)	5 (100%)	5 (100%)	4 (80%)	2 (40%)	5 (100%)	3 (60%)	5 (100%)	5 (100%)	5 (100%)	0	5 (100%)	2 (40%)	5 (100%)	4 (80%)	5 (100%)	5 (100%)	5 (100%)	5 (100%)
Enterococcus faecium (n=20)	20 (100%)	20 (100%)	16 (80%)	16 (80%)	19 (95%)	20 (100%)	10 (50%)	20(100%)	20 (100%)	20 (100%)	20 (100%)	20 (100%)	20 (100%)	20 (100%)	19 (95%)	ND	20 (100%)	16 (80%)	20 (100%)	20 (100%)	20 (100%)	9 (45%)	20 (100%)	20 (100%)	20 (100%)	20 (100%)	20 (100%)	20 (100%)	20 (100%)	20 (100%)	20 (100%)	20 (100%)
Escherichia coli (n=213)	213 (100%)	172 (80.75%)	112 (52.58%)	209 (98.12%)	211(99.06%)	208 (97.65%)	188 (88.26%)	196/209(93.77%)	195 (91.54%)	150 (70.42%)	103 (48.35%)	187 (86.38%)	211 (99.06%)	179 (84.03%)	197 (92.48%)	209/209(100%)	213(100%)	46 (21.59%)	207 (97.18%)	125 (58.68%)	186 (87.32%)	205 (95.77%)	143(67.13%)	26(12.20%)	167(78.40%)	64(30.04%)	129(60.56%)	123(57.74%)	154(72.30%)	158(74.17%)	144(67.60%)	142(66.66%)
Klebsiella pneumoniae (n=69)	69 (100%)	63 (91.30%)	42(60.8%)	67(97.1%)	69 (100%)	69 (100%)	63(91.3%)	68/68(100%)	66(95.6%)	56(81.1%)	44(63.7%)	62(89.8%)	69 (100%)	59(85.5%)	66(95.6%)	62/68(91.17%)	68(98.5%)	21(30.4%)	67(97.1%)	45 (65.21%0	65 (94.20%0	67 (97.10%)	53(76.81%)	10(14.49%)	54(78.26%)	15(21.73%)	53(76.81%)	43(62.31%)	52(75.36%)	52(75.36%)	50(72.46%)	41(59.42%)
Klebsiella quasipneumoniae (n=6)	6 (100%)	6 (100%)	6 (100%)	5(83.3%)	6 (100%)	6 (100%)	5(83.3%)	6 (100%)	6 (100%)	4(66.6%)	6 (100%)	6 (100%)	6 (100%)	6 (100%)	6 (100%)	6 (100%)	6 (100%)	4(66.6%)	6 (100%)	4(66.6%)	6 (100%)	5(83.3%)	2(33.33%)	1(16.66%)	5(83.3%)	2(33.33%)	3(50%)	2(33.33%)	3(50%)	2(33.33%)	2(33.33%)	2(33.33%)
Lysinibacillus fusiformis (n=9)	9 (100%)	8 (88.88%)	4(44.4%)	9 (100%)	9 (100%)	8(88.8%)	8(88.8%)	9 (100%)	9 (100%)	5(55.5%)	6(66.6%)	7(77.7%)	9 (100%)	8(88.8%)	8(88.8%)	9(100%)	5(55.5%)	5(55.5%)	9(100%)	5(55.5%)	7(77.7%)	8(88.8%)	7(77.7%)	0	8(88.8%)	3(33.33%)	7(77.7%)	4(44.44%)	8(88.8%)	7(77.7%)	7(77.7%)	8(88.8%)
Morganella morganii (n=106)	106 (100%)	93 (87.73%)	50(47.16%)	91(85.84%)	106 (100%)	102(96.22%)	80(76.41%)	87/97(89.69%)	101(95.28%)	70(66.03%)	86(81.13%)	68(64.15%)	98(92.45%)	81(76.41%)	69(65.09%)	97/97(100%)	106(100%)	26(24.52%)	103(97.16%)	75(70.75%)	97(91.50%)	68(64.15%)	47(44.33%)	10(9.43%)	81(76.41%)	19(17.92%)	29(27.35%)	36(33.96%)	52(49.05%)	53(50%)	39(36.79%)	35(33.01%)
Proteus mirabilis (n=33)	33 (100%)	30 (90.90%)	20(60.60%)	26(78.78%)	33 (100%)	31(93.93%)	25(75.75%)	22/23(95.65%)	31(93.93%)	28(84.84%)	21(63.63%)	32(96.96%)	32(96.96%)	30 (90.90%)	25(75.75%)	23/23(100%)	33 (100%)	6(18.18%)	33 (100%)	30 (90.90%)	32(96.96%)	33 (100%)	17(51.51%)	10(30.30%)	28(84.84%)	11(33.33%)	12(36.36%)	17(51.51%)	22(66.66%)	20(60.60%)	19(57.57%)	12(36.36%)
Providencia manganoxydans (n=15)	15 (100%)	15 (100%)	15 (100%)	14(93.3%)	15 (100%)	15 (100%)	15 (100%)	15 (100%)	15 (100%)	9(60%)	15 (100%)	6(40%)	15 (100%)	13(86.6%)	6(40%)	15 (100%)	15 (100%)	3(20%)	15 (100%)	15 (100%)	14(93.3%)	11(73.3%)	6(40%)	2(13.33%)	14(93.3%)	2(13.33%)	2(13.33%)	1(6.66%)	15 (100%)	9(60%)	3(20%)	3(20%)
Providencia rettgeri (n=32)	32 (100%)	31 (96.87%)	27(84.3%)	26(81.2%)	32 (100%)	31(96.8%)	28(87.5)	31(96.8%)	32 (100%)	23(71.8%)	26(81.2%)	25(78.1%)	31(96.8%)	25(78.1%)	29(90.6%)	32 (100%)	32 (100%)	10(31.2%)	32 (100%)	30(93.7%)	32 (100%)	32 (100%)	11(34.37%)	1(3.12%)	23(71.87%)	1(3.12%)	4(17.39%)	6(18.75%)	20(62.5%)	16(50%)	9(28.12%)	8(25%)
Providencia spp.(n=20)	20 (100%)	20 (100%)	18(90%)	17(85%)	20 (100%)	20 (100%)	20 (100%)	20 (100%)	20 (100%)	18(90%)	20 (100%)	16(80%)	20 (100%)	20 (100%)	14(70%)	20 (100%)	20 (100%)	3(15%)	20 (100%)	20 (100%)	20 (100%)	20 (100%)	6(30%)	4(20%)	19(95%)	5(25%)	3(15%)	3(15%)	18(90%)	12(60%)	6(30%)	4(20%)
Providencia stuartii (n=14)	14 (100%)	14 (100%)	10(71.4%)	6(42.8%)	14 (100%)	13(92.8%)	14 (100%)	14 (100%)	14 (100%)	10(71.4%)	13(92.8%)	8(57.1%)	13(92.8%)	12(85.7%)	7(50%)	14 (100%)	14 (100%)	1(7%)	14 (100%)	13(92.8%)	13(92.8%)	14 (100%)	5(35.71%)	3(21.42%)	12(85.7%)	4(28.57%)	4(28.57%)	5(35.71%)	8(57.14%)	6(42.85%)	5(35.71%)	4(28.57%)
Providencia vermicola (n=27)	27 (100%)	26 (96.29%)	27 (100%)	24(88.8%)	27 (100%)	26 (96.29%)	26 (96.29%)	26 (96.29%)	27 (100%)	19(70.3%)	23(85.1%)	16(59.2%)	26 (96.29%)	23(85.1%)	8(29.6%)	26 (96.29%)	26 (96.29%)	5(18.5%)	26 (96.29%)	24(88.8%)	27 (100%)	24(88.8%)	9(33.33%)	1(3.70%)	19(70.37%)	2(7.40%)	2(7.40%)	3(1.11%)	22(81.48%)	14(51.85%)	3(1.11%)	8(29.62%)
Providencia alcalifaciens (n=5)	5 (100%)	5 (100%)	2(40%)	3(60%)	5 (100%)	3(60%)	5 (100%)	5 (100%)	5 (100%)	2(40%)	5 (100%)	3(60%)	5 (100%)	3(60%)	2(40%)	5 (100%)	5 (100%)	2(40%)	5 (100%)	5 (100%)	5 (100%)	4(80%)	0	0	3(60%)	0	0	0	2(40%)	1(20%)	0	0
Pseudomonas aeruginosa (n=8)	8 (100%)	5 (62.5%)	8 (100%)	8 (100%)	8 (100%)	7(87.5%)	7(87.5%)	7(87.5%)	8 (100%)	6(75%)	5(62.5%)	7(87.5%)	7(87.5%)	8 (100%)	7(87.5%)	8 (100%)	6(75%)	4(50%)	8 (100%)	6(75%)	8 (100%)	8 (100%)	4(50%)	4(50%)	6(75%)	4(50%)	3(37.5%)	4(50%)	5(62.5%)	5(62.5%)	4(50%)	7(87.5%)
Pseudomonas putida (n=6)	6 (100%)	6 (100%)	5(83.3%)	6 (100%)	6 (100%)	6 (100%)	5(83.3%)	6 (100%)	6 (100%)	4(66.6%)	3(50%)	4 (66.6%)	6 (100%)	6 (100%)	6 (100%)	6 (100%)	6 (100%)	3 (50%)	6 (100%)	5(83.3%)	5(83.3%)	6 (100%)	5(83.3%)	3 (50%)	6 (100%)	5(83.3%)	5(83.3%)	3 (50%)	3 (50%)	5(83.3%)	5(83.3%)	5(83.3%)
Pseudomonas spp. (n=4)	4 (100%)	4 (100%)	4 (100%)	4 (100%)	3 (75%)	4 (100%)	3 (75%)	4 (100%)	4 (100%)	2 (50%)	2(50%)	4 (100%)	4 (100%)	3 (75%)	2(50%)	4 (100%)	4 (100%)	0	4 (100%)	2 (50%)	4 (100%)	4 (100%)	2 (50%)	2 (50%)	3 (75%)	2 (50%)	4 (100%)	4 (100%)	3 (75%)	3 (75%)	3 (75%)	3 (75%)
