# Supplementary material for: Antibiotic Contamination and AMR Dynamics in the Urban Sewage Microbiome: Insights from a Longitudinal surveillance
Source: Research Square preprint supplement (doi:10.21203/rs.3.rs-6137541/v1), 2025-03-12
Supplement: Supplementary file 3 [file 158e89a177d36e6929cc410f.xlsx]

## Sheet: S5a
Table S5a: Bacterial Isolates identified in the study using Sanger DNA sequencing
Bacterial isolates	Total No.
Achromobacter spp.	2
Acinetobacter baumanii	8
Aeromonas allosaccharophila	1
Aeromonas caviae	2
Aeromonas dhakensis	1
Aeromonas simiae	3
Aeromonas sp.	2
Aeromonas veronii	8
Alcaligenes sp.	4
Bacillus	1
Bacillus cereus	4
Bacteriodes fragilis	1
Bordettela trematum	1
Citrobactor freundii	8
Citrobacter portucalensis	1
Citrobactor spp.	11
Citrobacter werkmanii	18
Comamonas aquatica	1
Enterobacter cloacae	7
Enterobacter hormaechei	7
Enterobacter spp.	3
Enterobacter roggenkampii	5
Enterococcus spp.	18
Enterococcus avium	7
Enterococcus faecium	138
Enterococcus gilvus	3
Enterococcus raffinosus	1
Escherichia coli	264
Eubacterium spp.	1
Klebsiella michiganensis	3
Klebsiella pneumoniae	70
Klebsiella quasipneumoniae	6
Lysinibacillus fusiformis	10
Morganella morganii	127
Morganella spp.	2
Parabacteroides distasonis	1
Proteus mirabilis	72
Proteus penneri	1
Proteus spp	4
Proteus vulgaris	2
Providencia rettgeri	33
Providencia alcalifaciens	5
Providencia manganoxydans	15
Providencia spp.	21
Providencia stuartii	15
Providencia vermicola	27
Pseudomonas aeruginosa	8
Pseudomonas putida	6
Pseudomonas spp	4
Staphylococcus hominis	1
TOTAL	964

## Sheet: S5b
	Susceptibility profiling of sewage isolates
Sr. No.	SAMPLE	Bacterial species	Ampicillin (10µg)	Azithromycin (15µg)	Chlorampheniol (30µg)	Carbenicillin (100µg)	Colistin sulfate(10µg)	Ciprofloxacin(5µg)	Doxycycline(30µg)	Erythromycin (15µg)	Furazolidon (50µg)	Gentamycin10µg)	Imipenem (10µg)	Kanamycin (30µg)	Nalidixic acid(30µg)	Neomycin (30µg)	Norfloxacin (10µg)	Penicillin G (10 IU)	Polymyxin B (300 IU)	Rifampicin (30µg)	Streptomycin (10µg)	Spectinomycin (100µg)	Trimethoprim/Sulfamethoxazole (25µg)	Tetracyclin (30µg)	Cefoperazone (75µg)	Meropenem (10µg)	Cefpodoxime (10µg)	Ertapenem (10µg)	Aztreonam (30µg)	Cefepime (30 µg)	Ceftazidime (30 µg)	Cefotaxime (30 µg)	Ceftriaxone (30 µg)	Cefixime ( 5 µg)	Total no of resistances	Susceptible	Undetermined
1	C1S1B1	Proteus mirabilis	R	R	22mm S	28mm S	IR	12mm R	R	R	R	10mm R	10mm R	R	R	R	10mm R	R	IR	14mm S	R	R	R	IR	S (29mm)	S (32mm)	R (18mm) (I)	S (30mm)	S (35mm)	S (35mm)	S (25mm)	S (29mm)	S (32mm)	S (22mm)	20	12	0
2	C1S1B2	Proteus mirabilis	R	R	R	30mm S	IR	24mm I	R	R	R	13mm R	16mm R	R	R	R	20mm S	18mm R	IR	22mm S	R	R	R	IR	S (25mm)	R	R	R	S (34mm)	R (23mm) (I)	R (13mm)	S 27mm	S (27mm)	S (22mm)	24	8	0
3	C1S2B1	Providencia alcalifaciens	R	R	28mm S	25mm S	R	28mm S	12mm I	R	12mm R	14mm S	18mm R	16mm I	R	R	25mm S	R	R	18mm S	14mm I	R	R	14mm S	S (31mm)	S (31mm)	R (10mm)	S (32mm)	S (38mm)	S (35mm)	S (33mm)	S (39mm)	S (37mm)	S (36mm)	16	16	0
4	C1S3B1	Proteus mirabilis	R	R	23mm S	28mm S	IR	12mm R	R	R	R	12mm R	16mm R	R	R	R	12mmR	R	IR	15mm S	R	R	R	IR	R	S (25mm)	R	S (26mm)	S (26mm)	R (19mm) (I)	R (15mm)	S (27mm)	S (26mm)	S (26mm)	23	9	0
5	C1S3B2	Providencia rettgeri	IR	R	28mm S	24mm S	IR	13mm R	16mm S	R	R	13mm R	20mm R	R	R	R	13mm R	R	IR	12mm S	R	R	R	IR	S (24mm)	S (35mm)	S (23mm)	S (30mm)	S (31mm)	S (33mm)	S (22mm)	S (30mm)	S (33mm)	S (24mm)	18	14	0
6	C1S4B1	Proteus mirabilis	R	R	R	12mm R	IR	R	12mm I	R	8mm R	R	10mm R	R	R	R	R	R	IR	14mm S	R	R	R	IR	R (19mm) (I)	R (20mm) (I)	R (13mm)	R (16mm)	S (32mm)	R (19mm) (I)	R (10mm)	R (24mm) (I)	R (9mm)	S (21mm)	29	3	0
7	C1S4B2	Providencia spp.	R	R	18mm S	24mm S	R	15mm R	R	R	R	13mm R	18mm R	16mm I	R	R	14mm I	R	R	19mm S	R	R	R	R	S (24mm)	S (30mm)	R (18mm) (I)	S (28mm)	S (30mm)	S (33mm)	R (20mm) (I)	S (36mm)	S (27mm)	S (19mm)	21	11	0
8	C1S5B1	Providencia stuartii	IR	R	17mm S	30mm S	IR	18mm R	R	R	R	12mm R	22mm S	18mm S	R	R	17mm S	R	IR	22mm S	R	R	R	IR	S (26mm)	S (33mm)	R (20mm) (I)	S (29mm)	S (34mm)	S (36mm)	S (23mm)	S (30mm)	S (32mm)	S (23mm)	17	15	0
9	C1S5B2	Proteus mirabilis	R	R	20mm S	20mm I	IR	15mm R	R	R	R	12mm R	18mm R	R	R	R	12mm R	R	IR	24mm S	R	R	R	IR	S(23mm)	S (29mm)	R	R(21mm)	S(28mm)	S (30mm)	S (23mm)	R(24mm)	S(26mm)	S (29mm)	23	9	0
10	C1S5B3	Proteus mirabilis	R	R	22mm S	R	IR	R	14mm S	R	14mm R	R	20mm R	15mm I	R	R	R	R	IR	19mm S	R	R	R	IR	R	S(26mm)	R	S (25mm)	R	R (14mm)	S(31mm)	R	R	R	26	6	0
11	C2S1B1	Morganella morganii	IR	R	20mm S	18mm R	IR	14mm R	R	R	14mm R	14mm S	16mm R	18mmS	R	R	15mm I	R	IR	17mm S	R	R	R	13mm I	S (30mm)	S (34mm)	S (24mm)	S (28mm)	S (40mm)	S (32mm)	S (28mm)	S (35mm)	S (33mm)	S (25mm)	18	14	0	2
12	C2S1B2	Providencia vermicola	R	18mm S	R	10mm R	R	24mm I	R	R	R	14mm S	22mm S	18mmS	20mm S	R	22mm S	R	R	22mm S	10mm R	R	R	12mm R	S (24mm)	S (34mm)	S (23mm)	S (32mm)	S (24mm)	S (29mm)	R (11mm)	S (27mm)	S (28mm)	S (26mm)	16	16	0
13	C2S2B1	Providencia rettgeri	IR	R	14mm I	14mm R	IR	26mm S	R	R	R	11mm R	15mm R	10mmR	R	R	23mm S	R	IR	19mm S	R	R	R	IR	S (22mm)	S (27mm)	S (21mm)	S (28mm)	S (22mm)	S (27mm)	S (23mm)	R (23mm) (I)	R (21mm) (I)	S (20mm)	21	11	0
14	C2S3B1	Morganella morganii	IR	9mm R	23mm S	13mm R	IR	21mm R	R	R	13mm R	10mm R	19mm R	18mm S	R	R	20mm S	R	IR	16mm S	R	R	R	15mm S	S (24mm)	S (35mm)	R	S (27mm)	S (34mm)	S (34mm)	S (26mm)	S (28mm)	S (28mm)	S (24mm)	18	14	0
15	C2S4B1	Morganella morganii	IR	R	25mm S	15mm R	IR	22mm R	R	R	15mm R	14mm S	17mm R	19mm S	R	R	17mm S	R	IR	17mm S	R	R	R	12mm R	S (26mm)	S (34mm)	R (15mm)	S (26mm)	S (28mm)	S (37mm)	S (23mm)	S (31mm)	S (31mm)	R (15mm)	19	13	0
16	C2S4B2	Providencia vermicola	R	R	R	17mm R	R	22mm R	R	R	R	12mm R	19mmR	18mm S	R	R	18mm S	R	R	12mm S	R	R	R	12mm R	S (23mm)	S (33mm)	R (14mm)	S (27mm)	S (30mm)	S (35mm)	R (17mm)	R (25mm) (I)	S (27mm)	R (17mm) (I)	23	9	0
17	C2S5B1	Providencia spp.	R	R	14mm I	17mm R	R	R	R	R	R	13mm R	20mm R	18mm S	R	R	20mm S	R	R	11mm S	R	R	R	R	S (25mm)	S (33mm)	R	S (28mm)	S (30mm)	S (37mm)	R (18mm) (I)	R (25mm) (I)	S (30mm)	S (20mm)	22	10	0
18	C3S5B1	Klebsiella pneumoniae	IR	12mm I	23mm S	R	12mm I	22mm R	18mm S	R	16mm R	13mm R	20mm R	20mm S	R	13mm R	22mm S	R	14mm I	14mm S	18mm S	19mm S	18mm S	21mm S	S (30mm)	S (32mm)	S (24mm)	S (31mm)	S (32mm)	S (35mm)	S (28mm)	S (34mm)	S (34mm)	S (32mm)	14	18	0	1
19	C3S5B2	Escherichia coli	22mm S	14mm S	22mm S	24mm S	11mm R	20mm R	19mm S	R	20mm R	12mm R	24mm S	15mm I	R	13mm R	19mm S	R	R	R	R	10mm R	R	R	S (27mm)	S (29mm)	S (24mm)	S (29mm)	S (28mm)	S (30mm)	S (26mm)	S (31mm)	S (30mm)	S (19mm)	15	17	0
20	C3S5B3	Enterobacter cloacae	IR	R	19mm S	22mm S	10mm R	28mm S	15mm S	R	13mm R	13mm R	22mm S	15mm I	22mm S	12mm R	28mm S	R	11mm R	14mm S	15mm S	23mm S	22mm S	18mm S	S (29mm)	S (29mm)	S (22mm)	S (27mm)	S (30mm)	S (34mm)	S (27mm)	S (31mm)	S (32mm)	R (12mm)	11	21	0
21	C3S5B4	Enterobacter cloacae	IR	21mm S	24mm S	R	9mm R	28mm S	18mm S	R	14mm R	14mm S	20mm R	17mm S	22mm S	15mm I	30mm S	R	13mm R	14mm S	19mm S	22mm S	23mm S	22mm S	S (29mm)	S (30mm)	S (25mm)	S (28mm)	S (31mm)	S (36mm)	S (26mm)	S (30mm)	S (33mm)	S (31mm)	9	23	0
22	C4S1B1	Providencia stuartii	IR	R	R	R	IR	22mm R	R	R	R	R	R	R	R	R	20mm S	R	IR	12mm S	R	R	15mm S	IR	R (14mm)	R (20mm) (I)	R	R (13mm)	R (19mm) (I)	R (18mm)	R	R (13mm)	R (13mm)	R (12mm)	29	3	0
23	C4S2B1	Morganella morganii	IR	R	24mm S	14mm R	IR	22mm R	R	R	12mm R	15mm S	14mm R	16mm I	R	12mm R	19mm S	R	IR	14mm S	R	16mm I	16mm S	16mm S	S (25mm)	S (33mm)	S (28mm)	S (30mm)	S (33mm)	S (33mm)	S (28mm)	S (34mm)	S (34mm)	S (26mm)	16	16	0
24	C4S3B1	Providencia stuartii	IR	R	15mm I	24mm S	IR	24mm I	R	R	R	15mm S	14mm R	17mm S	R	13mm R	22mm S	R	IR	17mm S	R	R	R	IR	S (25mm)	S (33mm)	R (18mm) (I)	S (28mm)	S (31mm)	S (35mm)	R (20mm) (I)	S (28mm)	S (29mm)	S (23mm)	19	13	0
25	C4S4B1	Providencia spp.	R	R	16mm I	28mm S	R	14mm R	R	R	R	15mm S	16mm R	R	R	13mm R	13mm R	R	R	12mm S	R	R	R	R	S (24mm)	S (31mm)	R (19mm) (I)	S (28mm)	S (29mm)	S (33mm)	R (20mm) (I)	S (26mm)	S (27mm)	S (23mm)	21	11	0
26	C4S4B2	Providencia vermicola	R	R	R	18mm R	R	22mm R	R	R	R	14mm S	16mm R	18mm S	R	13mm R	20mm S	R	R	11mm S	R	R	R	10mm R	R (20mm) (I)	S(29mm)	R (11mm)	S (25mm)	S (29mm)	S (33mm)	R (18mm) (I)	R (25mm) (I)	S (27mm)	S (23mm)	22	10	0
27	C4S5B1	Providencia stuartii	IR	R	17mm S	25mm S	IR	16mm R	R	R	R	16mm S	13mm R	17mm S	R	16mm S	14mm I	R	IR	13mm S	R	R	R	IR	S (25mm)	S (33mm)	R (18mm) (I)	S (26mm)	S (30mm)	S (32mm)	S (21mm)	R (25mm) (I)	S (28mm)	S (25mm)	18	14	0
28	C5S1B1	Providencia manganoxydans	R	R	15mm I	20mm S	R	20mm R	R	R	R	15mm S	17mm R	20mm S	R	14mm I	18mm S	R	R	11mm S	R	R	R	14mm S	S (21mm)	S (30mm)	R (10mm)	S (26mm)	S (31mm)	S (36mm)	R (12mm)	R (25mm) (I)	S (27mm)	S(31mm)	19	13	0
29	C5S2B1	Providencia stuartii	IR	R	12mm R	29mm S	IR	31mm S	R	R	R	14mm S	17mm R	20mm S	24mm S	15mm I	28mm S	R	IR	18mm S	13mm R	R	14mm I	IR	S (30mm)	S (33mm)	S (32mm)	S (27mm)	S (36mm)	S (36mm)	S (29mm)	S (36mm)	S (35mm)	S (35mm)	15	17	0
30	C5S3B1	Enterobacter cloacae	IR	R	R	17mm R	R	R	R	R	12mm R	11mm R	14mm R	R	R	R	R	R	10mm R	R	R	R	R	14mm S	S(25mm)	S (28mm)	S(24mm)	S (32mm)	S(28mm)	S(30mm)	S(24mm)	S (30mm)	S (31mm)	S(31mm)	21	11	0
31	C5S3B2	Providencia rettgeri	IR	R	R	24mm S	IR	R	R	R	R	11mm R	16mm R	17mm S	R	14mm I	R	R	IR	11mm S	R	R	R	IR	R (20mm) (I)	S (30mm)	R	S (28mm)	S (28mm)	S (30mm)	R	R (22mm)	R (25mm)	S (24mm)	24	8	0
32	C5S4B1	Providencia stuartii	IR	R	R	25mm S	IR	15mm R	R	R	R	12mm R	10mm R	16mm I	R	14mm I	17mm S	R	IR	12mm S	R	R	R	IR	S (25mm)	S (32mm)	R (19mm) (I)	S (28mm)	S (29mm)	S (33mm)	S (21mm)	S (27mm)	S (28mm)	S (23mm)	20	12	0
33	C5S5B1	Providencia alcalifaciens	R	R	24mm S	20mm I	R	23mm I	R	R	13mm R	16mm S	20mm R	18mm S	R	16mm S	20mm S	R	R	R	R	R	R	12mm R	S (27mm)	S (34mm)	S (23mm)	S (30mm)	S (30mm)	S (36mm)	S (25mm)	S (23mm)	S (32mm)	S (28mm)	17	15	0
34	C6S3B1	Providencia vermicola	R	R	R	R	11mm R	R	R	R	14mm R	R	13mm R	R	R	12mm R	R	R	15mm I	18mm S	R	15mm I	R	R	R	S (30mm)	R	S (25mm)	R (12mm)	R (23mm) (I)	R	R	R	R	29	3	0
35	C6S3B2	Escherichia coli	R	R	11mm R	15mm R	R	R	15mm S	R	R	12mm R	11mm R	16mm I	R	13mm R	15mm I	R	R	R	R	R	R	12mm R	R (20mm) (I)	S (26mm)	R	S (27mm)	S (27mm)	S (34mm)	R	S (26mm)	S (29mm)	S (21mm)	24	8	0
36	C6S4B1	Providencia manganoxydans	R	R	R	17mm R	R	17mm R	R	R	R	13mm R	12mm R	16mm I	R	13mm R	16mm I	R	R	11mm S	R	R	R	11mm R	R (20mm) (I)	S (28mm)	R	S (24mm)	R (18mm) (I)	S (33mm)	R (10mm)	R (21mm)	S (25mm)	S (25mm)	26	6	0
37	C7S5B1	Providencia vermicola	R	R	R	17mm R	R	22mm R	R	R	R	13mm R	12mm R	16mm I	R	13mm R	17mm S	R	R	11mm S	R	R	R	R	R (20mm) (I)	S (27mm)	S (25mm)	S (23mm)	S (30mm)	S (28mm)	S (26mm)	S (28mm)	S (28mm)	R	22	10	0
38	C7S4B1	Morganella morganii	IR	R	R	R	IR	R	R	R	12mm R	9mm R	14mm R	11mm R	R	13mm R	R	R	IR	13mm S	R	R	R	15mm S	S (23mm)	S (31mm)	R (17mm)	S (28mm)	S (30mm)	S (35mm)	R (19mm) (I)	S (27mm)	S (28mm)	R (18mm) (I)	23	9	0
39	C7S5B2	Enterobacter roggenkampii	R	R	R	R	R	R	R	R	R	R	15mm R	10mmR	R	12mm R	R	R	R	12mm S	R	R	R	R	R (14mm)	S (33mm)	R	S (29mm)	R	R (23mm) (I)	R	R (17mm)	R (13mm)	R (16mm) (I)	29	3	0
40	C7S6B1	Providencia manganoxydans	R	R	R	15mm R	R	11mm R	R	R	R	11mm R	13mm R	13mm R	R	11mm R	10mm R	R	R	11mm S	R	R	R	R	R (20mm) (I)	S (30mm)	R (11mm)	S (27mm)	S (30mm)	S (32mm)	R (12mm)	R (23mm) (I)	S (28mm)	S (23mm)	25	7	0
41	C8S4B1	Providencia stuartii	IR	R	R	29mm S	IR	21mm R	R	R	R	13mm R	16mm R	8mm R	R	11mm R	20mm S	R	IR	19mm S	R	R	R	IR	S (23mm)	S (34mm)	R (18mm) (I)	S (30mm)	S (33mm)	S (37mm)	R (19mm) (I)	S (28mm)	S (25mm)	S (21mm)	21	11	0
42	C8S5B1	Providencia manganoxydans	R	R	R	17mm R	R	19mm R	R	R	R	12mm R	14mm R	17mm S	R	14mm I	20mm S	R	R	12mm S	R	R	R	11mm R	S (24mm)	S (28mm)	R (14mm)	S (25mm)	S (30mm)	S (34mm)	R (18mm) (I)	S (27mm)	S (29mm)	R (15mm)	22	10	0
43	C8S5B2	Enterobacter roggenkampii	R	R	R	R	11mm R	R	R	R	R	12mm R	16mm R	9mm R	R	14mm I	R	R	14mm I	16mm S	R	17mm I	R	R	R	S (28mm)	R	R (20mm) (I)	R	R (13mm)	R (10mm)	R	R	R (12mm)	30	2	0
44	C8S6B1	Morganella morganii	IR	9mm R	22mm S	24mm S	IR	21mm R	11mm R	R	10mm R	13mm R	9mm R	15mm I	R	13mm R	18mm S	R	IR	13mm S	R	R	R	17mm S	S (26mm)	S (27mm)	R (19mm) (I)	S (24mm)	S (32mm)	S (30mm)	S (25mm)	R (24mm) (I)	S (31mm)	S (23mm)	19	13	0
45	C9S1B1	Providencia stuartii	IR	R	15mm I	30mm S	IR	17mm R	R	R	R	18mm S	17mm R	19mm S	R	17mm S	17mm S	R	IR	15mm S	R	R	R	IR	S (25mm)	S (30mm)	R (19mm) (I)	S (26mm)	S (29mm)	S (35mm)	R (18mm) (I)	S (26mm)	S (27mm)	S (20mm)	18	14	0
46	C9S2B1	Providencia manganoxydans	R	R	R	17mm R	R	21mm R	R	R	R	14mm S	12mm R	17mm S	R	15mm I	21mm S	R	R	10mm S	R	R	R	16mm S	S (25mm)	S (29mm)	R (11mm)	S (24mm)	S (30mm)	S (33mm)	R (15mm)	R (25mm) (I)	S (29mm)	S (19mm)	20	12	0
47	C9S3B1	Providencia alcalifaciens	R	11mm R	25mm S	24mm S	R	26mm S	R	R	13mm R	16mm S	15mm R	17mm S	R	17mm S	26mm S	R	R	R	R	R	R	9mm R	S (28mm)	S (28mm)	S (22mm)	S (27mm)	S (29mm)	S (33mm)	S (22mm)	S (29mm)	S (30mm)	S (24mm)	15	17	0
48	C9S5B1	Providencia rettgeri	IR	R	14mm I	24mm S	IR	15mm R	R	R	R	15mm S	14mm R	16mm I	R	14mm I	14mm I	R	IR	11mm S	R	R	R	IR	S (29mm)	S (34mm)	R (21mm)	S (32mm)	S (33mm)	S (37mm)	S (25mm)	S (30mm)	S (32mm)	R (12mm)	21	11	0
49	C9S5B2	Providencia manganoxydans	R	R	R	12mm R	R	R	R	R	R	14mm S	16mm R	18mm S	R	14mm I	R	R	R	10mm S	R	R	R	10mm R	S (21mm)	S (27mm)	R	S (26mm)	S (28mm)	S (32mm)	R	R (21mm)	R (24mm)	R	24	8	0
50	C10S3B1	Morganella morganii	IR	R	27mm S	13mm R	IR	19mm R	14mm S	R	11mm R	16mm S	9mm R	17mm S	R	16mm S	19mm S	R	IR	15mm S	R	15mm I	R	14mm S	S (27mm)	S (32mm)	R (17mm)	S (28mm)	S (36mm)	S (35mm)	S (27mm)	S (34mm)	S (32mm)	S (27mm)	15	17	0
51	C10S4B1	Morganella morganii	IR	R	12mm R	R	IR	R	R	R	12mm R	R	R	11mm R	13mm R	16mm S	R	R	IR	14mm S	R	R	R	R	R (14mm)	S (29mm)	R	S (27mm)	R (19mm) (I)	S (25mm)	R (20mm) (I)	R (19mm)	R (18mm)	S (22mm)	26	6	0
52	C10S4B2	Providencia manganoxydans	R	R	R	18mm R	R	24mm I	R	R	R	13mm R	13mm R	16mm I	R	15mm I	22mm S	R	R	10mm S	R	R	R	14mm S	R (18mm) (I)	S (34mm)	S (23mm)	S (26mm)	R (18mm) (I)	S (29mm)	R (16mm)	S (30mm)	S (29mm)	S (20mm)	22	10	0
53	C10S5B1	Providencia vermicola	R	R	R	19mm R	R	19mm R	R	R	R	15mm S	14mm R	16mm I	R	16mm S	20mm S	R	R	10mm S	R	R	R	17mm S	S (22mm)	S (33mm)	R	S (25mm)	S (29mm)	S (33mm)	R (18mm) (I)	R (25mm) (I)	S (28mm)	S (21mm)	20	12	0
54	C10S6B1	Morganella morganii	IR	R	R	R	IR	R	12mm I	R	13mm R	16mm S	11mm R	R	R	16mm S	11mm R	R	IR	14mm S	R	R	R	R	R (14mm)	S (31mm)	R	S (30mm)	S (24mm)	S (25mm)	S (23mm)	R (17mm)	R (17mm)	S (25mm)	23	9	0
55	C10S7B1	Morganella morganii	IR	R	8mm R	R	IR	R	17mm S	R	12mm R	11mm R	11mm R	15mm I	R	16mm S	11mm R	R	IR	18mm S	R	R	R	20mm S	R (16mm) (I)	S (26mm)	R (11mm)	S (29mm)	S (22mm)	R (21mm) (I)	S (22mm)	R (22mm)	R (20mm) (I)	S (25mm)	23	9	0
56	C11S1B1	Morganella morganii	IR	R	11mm R	R	IR	R	R	R	13mm R	12mm R	12mm R	8mm R	R	13mm R	R	R	IR	17mm S	R	R	R	12mm R	R (14mm)	S (27mm)	R	S (26mm)	R (17mm)	S (25mm)	S (21mm)	R (19mm)	R (17mm)	S (28mm)	26	6	0
57	C11S1B2	Providencia spp.	R	R	10mm R	16mm R	R	20mm R	R	R	R	15mm S	14mm R	17mm S	R	15mm I	20mm S	R	R	10mm S	R	R	R	R	R (15mm)	S (31mm)	R (13mm)	S (28mm)	R (20mm) (I)	R (24mm) (I)	R (20mm) (I)	R (21mm)	R (20mm) (I)	S (22mm)	25	7	0
58	C11S3B1	Morganella morganii	IR	R	28mm S	13mm R	IR	20mm R	13mm S	R	11mm R	16mm S	10mm R	17mm S	R	16mm S	19mm S	R	IR	14mm S	R	15mm I	R	18mm S	S (23mm)	S (33mm)	R	S (28mm)	S (32mm)	S (35mm)	S (23mm)	S (29mm)	S (30mm)	R (17mm) (I)	16	16	0
59	C11S3B2	Proteus mirabilis	R	R	R	13mm R	IR	20mm R	11mm R	R	R	14mm S	R	R	R	12mm R	20mm S	R	IR	14mm S	R	R	R	IR	S (24mm)	R (21mm) (I)	R (16mm)	R (13mm)	S (36mm)	S (26mm)	R	R (24mm) (I)	S (25mm)	S (26mm)	24	8	0
60	C11S4B1	Morganella morganii	IR	R	24mm S	14mm R	IR	13mm R	12mm I	R	12mm R	16mm S	12mm R	18mm S	R	16mm S	15mm I	R	IR	R	R	R	R	R	R (20mm) (I)	S (25mm)	R (13mm)	S (26mm)	S (28mm)	S (32mm)	S (23mm)	S (27mm)	S (27mm)	S (20mm)	20	12	0
61	C11S4B2	Providencia manganoxydans	R	11mm R	R	R	R	15mm R	R	R	R	14mm S	R	14mm R	R	14mm I	16mm I	R	R	R	R	R	R	8mm R	R (19mm) (I)	R (18mm)	R (10mm)	R (18mm)	S (35mm)	R (24mm) (I)	R	R (19mm)	R (17mm)	R (18mm) (I)	30	2	0
62	C11S5B1	Morganella morganii	IR	R	22mm S	13mm R	IR	12mm R	9mm R	R	11mm R	16mm S	13mm R	17mm S	R	16mm S	14mm I	R	IR	R	R	R	R	16mm S	S (22mm)	S (30mm)	R (14mm)	S (28mm)	S (29mm)	S (34mm)	S (21mm)	S (27mm)	S (29mm)	R (12mm)	19	13	0
63	C11S5B2	Providencia manganoxydans	R	R	R	R	11mm R	19mm R	R	R	R	13mm R	R	14mm R	R	11mm R	16mm I	R	R	R	R	R	R	12mm R	R (17mm) (I)	R (20mm) (I)	R (10mm)	R (20mm) (I)	S (33mm)	S (25mm)	R	R (20mm)	R (18mm)	S (30mm)	29	3	0
64	C11S6B1	Morganella morganii	IR	R	11mm R	R	IR	11mm R	14mm S	R	13mm R	15mm S	12mm R	16mm I	R	16mm S	9mm R	R	IR	R	R	14mm R	12mm I	12mm R	S (21mm)	S (29mm)	S (29mm)	S (32mm)	S (35mm)	S (37mm)	S (21mm)	S (37mm)	S (33mm)	R (17mm) (I)	20	12	0
65	C11S6B2	Providencia stuartii	IR	R	R	R	IR	R	8mm R	R	10mm R	R	R	R	R	11mm R	R	R	IR	15mm S	R	R	11mm R	IR	R (17mm) (I)	R (21mm) (I)	R	R (20mm) (I)	S (37mm)	R (23mm) (I)	R	R (17mm)	R (20mm) (I)	S (28mm)	29	3	0
66	C11S6B3	Aeromonas dhakensis	R	R	17mm S	R	R	R	11mm R	R	21mm I	R	R	R	R	16mm S	R	R	R	14mm S	R	R	R	R	R (17mm) (I)	R (17mm)	R	R	S (29mm)	R (13mm)	R	R (11mm)	R	R (12mm)	28	4	0
67	C11S7B1	Morganella morganii	IR	R	18mm S	11mm R	IR	20mm R	10mm R	R	11mm R	10mm R	11mm R	16mm I	R	16mm S	20mm S	R	IR	R	R	R	R	14mm S	R (18mm) (I)	S (27mm)	R	S (25mm)	S (26mm)	R (24mm) (I)	R (18mm) (I)	R (21mm)	R (24mm)	S (21mm)	24	8	0
68	C11S7B2	Providencia manganoxydans	R	R	R	16mm R	R	20mm R	R	R	R	13mm R	14mm R	17mm S	R	15mm I	20mm S	R	R	10mm S	R	R	R	15mm S	R (18mm) (I)	S (29mm)	R	S (24mm)	S (29mm)	S (34mm)	R (10mm)	R (21mm)	S (26mm)	S (24mm)	22	10	0
69	C12S1B1	Providencia vermicola	R	R	R	21mm S	R	23mm I	R	R	R	16mm S	16mm R	19mm S	R	R	23mm S	R	R	14mm S	R	R	R	16mm S	S (26mm)	S (33mm)	R (12mm)	S (30mm)	S (33mm)	S (37mm)	R (19mm) (I)	S (29mm)	S (30mm)	S (20mm)	18	14	0
70	C12S2B1	Providencia rettgeri	IR	R	11mm R	9mm R	IR	R	R	R	R	17mm S	18mm R	13mm R	R	17mm S	R	R	IR	10mm S	R	R	R	IR	R (20mm) (I)	S (34mm)	R (18mm) (I)	S (30mm)	S (22mm)	S (25mm)	R	R (22mm)	S (24mm)	S (36mm)	23	9	0
71	C12S2B2	Providencia manganoxydans	R	R	R	18mm R	R	15mm R	R	R	R	16mm S	14mm R	18mm S	R	16mm S	23mm S	R	R	14mm S	R	R	R	13mm I	S (23mm)	S (30mm)	R	S (25mm)	S (29mm)	S(37mm)	R (10mm)	S (27mm)	S (29mm)	S (31mm)	19	13	0
72	C12S3B1	Providencia manganoxydans	R	R	10mm R	R	R	21mm R	R	R	R	17mm S	13mm R	19mm S	R	16mm S	20mm S	R	R	12mm S	R	R	R	R	S (25mm)	S (33mm)	R (12mm)	S (30mm)	S (31mm)	S (35mm)	R (15mm)	S (29mm)	S (31mm)	R	20	12	0
73	C12S3B2	Providencia vermicola	R	R	R	R	R	21mm R	R	R	R	R	16mm R	20mm S	12mm R	17mm S	23mm S	R	R	8mm R	21mm S	R	R	13mm I	S (22mm)	S (30mm)	R (18mm) (I)	S (27mm)	S (27mm)	S (33mm)	R (16mm)	R (24mm) (I)	S (26mm)	S (19mm)	21	11	0
74	C12S4B1	Providencia rettgeri	IR	R	23mm S	24mm S	IR	20mm R	15mm S	R	12mm R	16mm S	R	17mm S	R	16mm S	18mm S	R	IR	17mm S	R	R	R	IR	S (22mm)	S (31mm)	R (15mm)	S (27mm)	S (30mm)	S (36mm)	R (14mm)	S (27mm)	S (27mm)	R (12mm)	17	15	0
75	C12S5B1	Providencia rettgeri	IR	R	12mm R	R	IR	R	R	R	R	16mm S	18mm R	14mm R	R	18mm S	R	R	IR	20mm S	R	13mm R	R	IR	R (19mm) (I)	S (34mm)	R (17mm)	S (32mm)	R (19mm) (I)	R (24mm) (I)	R	R (22mm)	R (20mm) (I)	S (20mm)	26	6	0
76	C12S5B2	Enterobacter roggenkampii	R	R	R	R	R	R	R	R	R	R	18mm R	R	R	14mm I	14mm I	R	R	9mm I	R	12mm R	R	R	R	S (31mm)	R	S (23mm)	R	R (16mm)	R	R (11mm)	R (10mm)	R	30	2	0
77	C12S5B3	Providencia rettgeri	IR	R	R	17mm R	IR	R	R	R	R	18mm S	18mm R	20mm S	R	17mm S	R	R	IR	19mm S	R	15mm I	R	IR	S (22mm)	S (34mm)	R (19mm) (I)	S (32mm)	S (24mm)	S (26mm)	R (10mm)	S (26mm)	S (27mm)	S (28mm)	20	12	0
78	C13S1B1	Morganella morganii	IR	R	R	8mm R	IR	15mm R	R	R	13mm R	15mm S	19mm R	19mm S	R	13mm R	R	R	IR	17mm S	R	R	R	9mm R	S (21mm)	S (26mm)	R	S (26mm)	S (25mm)	R (22mm) (I)	R (15mm)	R (23mm) (I)	R (22mm) (I)	R (12mm)	25	7	0
79	C13S2B1	Enterobacter spp.	R	12mm R	19mm S	23mm S	9mm R	20mm R	9mm R	R	14mm R	11mm R	15mm R	15mm I	R	11mm R	15mm I	R	9mm R	16mm S	12mm R	17mm I	R	8mm R	S (35mm)	S (30mm)	S (24mm)	S (31mm)	S (35mm)	S (33mm)	S (29mm)	S (37mm)	S (31mm)	S (20mm)	19	13	0
80	C13S3B1	Escherichia coli	R	11mm R	22mm S	R	9mmR	R	R	R	16mmR	R	19mm R	15mm I	R	R	R	R	11mm R	20mm S	R	18mm S	R	R	S (22mm)	S (30mm)	R (11mm)	R (20mm) (I)	R	R (20mm) (I)	R (10mm)	S (29mm)	S (31mm)	S (23mm)	24	8	0
81	C13S3B2	Providencia vermicola	R	R	R	10mm R	R	11mm R	R	R	13mm R	14mm S	15mm R	17mm S	R	11mm R	12mm R	R	R	R	R	R	R	R	R (20mm) (I)	S (30mm)	R (13mm)	S (26mm)	S (26mm)	S (29mm)	R (19mm) (I)	R (24mm) (I)	S (26mm)	S (21mm)	24	8	0
82	C13S3B3	Morganella morganii	IR	R	10mm R	15mm R	IR	15mm R	R	R	R	10mm R	14mm R	16mm I	R	11mm R	14mm I	R	IR	12mm S	R	R	R	9mm R	S (24mm)	S (31mm)	R (16mm)	S (26mm)	S (29mm)	S (33mm)	R (20mm) (I)	S (26mm)	S (27mm)	S (21mm)	23	9	0
83	C13S4B1	Providencia rettgeri	IR	R	R	16mm R	IR	R	R	R	8mm R	13mm R	14mm R	11mm R	R	12mm R	R	R	IR	19mm S	R	17mm I	R	IR	R (19mm) (I)	S (27mm)	R (10mm)	S (25mm)	S (28mm)	S (31mm)	R (13mm)	R (21mm)	S (23mm)	S (29mm)	25	7	0
84	C13S4B2	Morganella morganii	IR	R	20mm S	12mm R	IR	16mm R	10mm R	R	15mm R	17mm S	8mm R	18mm S	R	17mm S	16mm I	R	IR	R	R	R	R	13mm I	S (24mm)	S (30mm)	R (18mm) (I)	S (24mm)	S (27mm)	S (32mm)	S (21mm)	R (24mm) (I)	S (28mm)	S (24mm)	20	12	0
85	C13S5B1	Morganella morganii	IR	R	22mm S	R	IR	R	R	R	12mm R	18mm S	R	24mm S	R	15mm I	21mm S	R	IR	14mm S	R	17mm I	R	13mm I	S (21mm)	S (29mm)	R	S (27mm)	S (26mm)	S (31mm)	R (18mm) (I)	S (26mm)	S (26mm)	S (19mm)	19	13	0
86	C14S1B1	Providencia vermicola	R	R	R	16mm R	R	21mm R	R	R	R	R	16mm R	16mm I	R	13mm R	20mm S	R	R	11mm S	R	R	R	10mm R	S(23mm)	S(29mm)	R	S(30mm)	S(25mm)	S(30mm)	R(11mm)	R(23mm)I	S(26mm)	S(31mm)	23	9	0
87	C14S2B1	Morganella morganii	IR	R	15mm I	R	IR	R	R	R	11mm R	13mm R	14mm R	11mm R	R	12mm R	R	R	IR	15mm S	R	R	R	12mm R	R(17mm)	S (31mm)	R (13mm)	S (30mm)	S (33mm)	S (28mm)	R	R(20mm)	S (29mm)	R	25	7	0
88	C14S3B1	Morganella morganii	IR	R	20mm S	R	IR	R	R	R	14mm R	19mm S	R	20mm S	R	17mm S	R	R	IR	15mm S	R	26mm S	R	R	S (23mm)	S (31mm)	R (13mm)	S (26mm)	S (30mm)	S (30mm)	S (24mm)	S (28mm)	S (29mm)	S (22mm)	17	15	0
89	C14S3B2	Providencia vermicola	R	R	R	15mm R	11mm R	20mm R	R	R	R	11mm R	14mm R	16mm I	11mm R	10mm R	20mm S	R	R	11mm S	R	R	R	11mm R	R(10mm)	S(32mm)	R(13mm)	S(28mm)	S(27mm)	S(28mm)	R	R	S(28mm)	R	25	7	0
90	C14S4B1	Providencia stuartii	IR	R	R	21mm I	IR	12mm R	R	R	R	8mm R	16mm R	R	R	9mm R	13mm R	R	IR	13mm S	R	R	R	IR	S (28mm)	S (34mm)	S (26mm)	S (29mm)	S (31mm)	S (32mm)	S (28mm)	S (30mm)	S (29mm)	S (32mm)	21	11	0
91	C14S4B2	Providencia stuartii	IR	R	R	25mm S	IR	13mm R	R	R	R	9mm R	16mm R	8mm R	R	9mm R	12mm R	R	IR	13mm S	R	R	R	IR	R	R	R	R	R	R	R	R	R	R	30	2	0
92	C14S5B1	Morganella morganii	IR	15mm S	21mm S	R	IR	23mm I	16mm S	15mm	22mm I	R	R	R	22mm S	R	21mm S	R	IR	20mm S	R	R	R	18mm S	S (21mm)	S (30mm)	R (10mm)	S (26mm)	S (27mm)	S (28mm)	R (18mm) (I)	S (36mm)	S (28mm)	S (21mm)	16	15	1
93	C14S5B2	Providencia vermicola	R	R	R	16mm R	R	20mm R	R	R	R	11mm R	12mm R	15mm I	R	12mm R	19mm S	R	R	12mm S	R	R	R	R	S (22mm)	S (30mm)	S (21mm)	S (28mm)	S (28mm)	S (32mm)	R (19mm) (I)	S (27mm)	S (29mm)	S (25mm)	21	11	0
94	C14S6B1	Providencia spp.	R	R	11mm R	18mm R	R	22mm R	R	R	R	11mm R	20mm R	17mm S	12mm R	11mm R	21mm S	R	R	12mm S	R	R	R	R	S (25mm)	S (34mm)	R (19mm) (I)	S (29mm)	S (29mm)	S (32mm)	R (20mm) (I)	S (27mm)	S (30mm)	S (23mm)	21	11	0
95	C14S6B2	Providencia vermicola	R	R	R	22mm S	R	28mm S	R	R	R	12mm R	21mm S	19mm S	R	12mm R	27mm S	R	R	14mm S	R	R	R	R	S (24mm)	S (33mm)	R (17mm)	S (27mm)	S (31mm)	S (35mm)	R (19mm) (I)	S (28mm)	S (29mm)	S (21mm)	18	14	0
96	C15S1B1	Morganella morganii	IR	R	12mm R	17mm R	IR	20mm R	R	R	R	11mm R	18mm R	17mm S	R	11mm R	18mm S	R	IR	11mm S	R	R	R	11mm R	S (21mm)	S (30mm)	R (10mm)	S (24mm)	S (27mm)	S (31mm)	R (15mm)	R (21mm)	S (26mm)	R (18mm) (I)	23	9	0
97	C15S2B1	Providencia vermicola	R	R	R	12mm R	R	R	R	R	R	R	13mm R	16mm I	R	11mm R	R	R	R	R	R	19mm S	R	R	S (24mm)	S (30mm)	S (21mm)	S (27mm)	S (28mm)	S (31mm)	S (23mm)	S (32mm)	S (29mm)	S (29mm)	21	11	0
98	C15S3B1	Morganella morganii	IR	R	23mm S	14mm R	IR	R	R	R	12mm R	12mm R	14mm R	18mm S	R	11mm R	20mm S	R	IR	18mm S	R	20mm S	R	11mm R	S (23mm)	S (28mm)	R	S (22mm)	S (26mm)	S (31mm)	S (22mm)	R (21mm)	S (28mm)	S (22mm)	19	13	0
99	C15S3B2	Providencia vermicola	R	R	R	16mm R	R	16mm R	R	R	R	11mm R	19mm R	17mm S	R	11mm R	15mm I	R	R	11mm S	R	R	R	10mm R	S (23mm)	S (33mm)	S (22mm)	S (29mm)	S (32mm)	S (33mm)	R (20mm) (I)	S (29mm)	S (31mm)	S (24mm)	21	11	0
100	C15S3B3	Providencia manganoxydans	R	R	10mm R	17mm R	R	20mm R	R	R	R	12mm R	14mm R	17mm S	R	12mm R	20mm S	R	R	11mm S	R	R	R	R	S (24mm)	S (30mm)	R	S (28mm)	S (31mm)	S (33mm)	R (13mm)	S (28mm)	S (30mm)	S (20mm)	21	11	0
101	C15S4B1	Providencia vermicola	R	R	R	16mm R	R	11mm R	R	R	R	11mm R	17mm R	16mm I	R	11mm R	10mm R	R	R	11mm S	R	R	R	11mm R	R (20mm) (I)	S (29mm)	R	R (14mm)	S (28mm)	S (33mm)	R (16mm)	R (22mm)	S (25mm)	R (17mm) (I)	27	5	0
102	C15S6B1	Providencia spp.	R	R	R	20mm I	R	R	R	R	12mm R	R	11mm R	R	R	R	R	R	R	18mm S	R	R	R	R	S (21mm)	R (22mm) (I)	R (15mm)	R (20mm) (I)	S (34mm)	S (28mm)	R	R (21mm)	S (23mm)	S (27mm)	26	6	0
103	C15S7B1	Morganella morganii	IR	R	R	22mm S	IR	R	10mm R	R	11mm R	R	15mm R	15mm I	R	11mm R	14mm I	R	IR	16mm S	R	24mm S	R	R	R (18mm) (I)	S (30mm)	R (16mm)	S (30mm)	S (27mm)	R (23mm) (I)	S (21mm)	R (21mm)	R (19mm)	S (19mm)	24	8	0
104	C15S8B1	Providencia stuartii	IR	R	R	R	IR	R	R	R	R	R	17mm R	R	R	R	R	R	IR	R	R	R	R	IR	R (12mm)	S (32mm)	R	S (27mm)	R (11mm)	R (13mm)	R	R (13mm)	R (10mm)	R (16mm) (I)	30	2	0
105	C15S9B1	Providencia spp.	R	R	R	R	10mm R	16mm R	R	R	12mm R	R	14mm R	R	R	R	17mm S	R	R	20mm S	R	R	R	R	R (14mm)	R (20mm) (I)	R	R (18mm)	R (16mm)	R (21mm)	R	R (16mm)	R (17mm)	R (16mm) (I)	30	2	0
106	C15S9B2	Providencia spp.	R	R	R	9mm R	R	14mm R	R	R	R	R	14mm R	R	R	12mm R	14mm I	R	R	R	R	10mm R	R	R	R (14mm)	S (23mm)	R	R (21mm) (I)	R (19mm) (I)	R (22mm) (I)	R	R (14mm)	R (13mm)	R (12mm)	30	2	0
107	C15S9B3	Morganella morganii	IR	R	21mm S	R	IR	R	R	R	R	R	11mm R	R	R	13mm R	R	R	IR	16mm S	R	14mm R	R	R	R (12mm)	R (18mm)	R	R (18mm)	S (28mm)	R (20mm) (I)	R	R (17mm)	R (16mm)	S (26mm)	28	4	0
108	C16S1B1	Morganella morganii	IR	R	32mm S	16mm R	IR	21mm R	R	R	14mm R	15mm S	18mm R	21mm S	R	16mm S	R	R	IR	15mm S	R	26mm S	R	R	S (27mm)	S (32mm)	S (24mm)	S (28mm)	S (35mm)	S (35mm)	S (28mm)	S (32mm)	S (27mm)	S (31mm)	16	16	0
109	C16S1B2	Providencia stuartii	IR	R	22mm S	R	IR	R	R	R	17mm R	R	18mm R	18mm S	R	13mm R	R	R	IR	18mm S	R	R	R	IR	S (24mm)	S (31mm)	R (19mm) (I)	S (26mm)	S (28mm)	S (33mm)	R (20mm) (I)	S (26mm)	S (27mm)	S (23mm)	21	11	0
110	C16S1B3	Providencia vermicola	R	R	R	17mm R	R	19mm R	R	R	R	R	19mm R	10mmR	R	12mm R	20mm S	R	R	11mm S	R	R	R	9mm R	S (22mm)	S (31mm)	R (12mm)	S (26mm)	S (29mm)	S (34mm)	R (13mm)	R (23mm) (I)	S (27mm)	S (20mm)	23	9	0
111	C16S2B1	Providencia vermicola	R	R	R	19mm R	R	19mm R	R	R	R	10mm R	18mm R	17mm S	R	10mm R	20mm S	R	R	9mm R	R	R	R	11mm R	S (24mm)	S (32mm)	R (20mm) (I)	S (30mm)	S (30mm)	S (35mm)	R (20mm) (I)	S (28mm)	S (27mm)	R (17mm) (I)	23	9	0
112	C16S2B2	Morganella morganii	IR	R	R	27mm S	IR	14mm R	R	R	R	10mm R	20mm R	9mm R	R	11mm R	13mm R	R	IR	14mm S	R	R	R	R	R (20mm) (I)	S (35mm)	S (28mm)	S (33mm)	S (38mm)	S (39mm)	S (29mm)	S (36mm)	S (33mm)	S (36mm)	21	11	0
113	C16S3B1	Providencia alcalifaciens	R	R	R	R	R	12mm R	R	R	12mm R	11mm R	15mm R	15mm I	R	11mm R	15mm I	R	R	11mm S	R	R	R	R	S (23mm)	S (29mm)	R (16mm)	S (29mm)	S (27mm)	S (32mm)	R (18mm) (I)	S (26mm)	S (27mm)	S (20mm)	23	9	0
114	C16S3B2	Providencia alcalifaciens	R	R	R	16mm R	R	14mm R	R	R	R	11mm R	15mm R	R	R	R	13mm R	R	R	16mm S	R	16mm I	R	R	S (22mm)	S (31mm)	R (19mm) (I)	S (27mm)	S (24mm)	S (27mm)	R (15mm)	R (25mm) (I)	S (25mm)	S (26mm)	24	8	0
115	C16S3B3	Providencia spp.	R	R	R	15mm R	R	17mm R	R	R	R	11mm R	14mm R	16mm I	11mm R	R	15mm I	R	R	9mm R	R	R	R	R	S (23mm)	S (31mm)	R (13mm)	S (28mm)	S (30mm)	S (32mm)	R (16mm)	R (25mm) (I)	S (29mm)	S (22mm)	25	7	0
116	C16S5B1	Providencia rettgeri	IR	R	R	14mm R	IR	R	R	R	R	12mm R	18mm R	R	R	R	R	R	IR	17mm S	R	17mm I	R	IR	S (25mm)	S (30mm)	R (14mm)	S (28mm)	S (23mm)	S (28mm)	R (20mm) (I)	R (24mm) (I)	S (24mm)	S (21mm)	24	8	0
117	C16S5B2	Providencia manganoxydans	R	R	13mm R	17mm R	R	17mm R	R	R	R	13mm R	16mm R	18mm S	R	12mm R	17mm S	R	R	12mm S	R	R	17mm S	11mm R	S (22mm)	S (26mm)	R (10mm)	S (24mm)	S (27mm)	S (31mm)	R (10mm)	R (21mm)	S (26mm)	S (24mm)	21	11	0
118	C16S5B3	Providencia vermicola	R	R	R	11mm R	R	R	R	R	R	19mm S	12mm R	12mm R	R	9mm R	R	R	R	13mm S	R	R	R	R	R (20mm) (I)	R (20mm) (I)	R (18mm) (I)	R (18mm)	S (33mm)	R (22mm) (I)	R (11mm)	S (27mm)	S (30mm)	S (32mm)	26	6	0
119	C16S6B1	Providencia rettgeri	IR	R	18mm S	R	IR	18mm R	R	R	R	R	13mm R	R	R	11mm R	16mm I	R	IR	17mm S	9mm R	10mm R	R	IR	R (16mm) (I)	S (25mm)	R (11mm)	S (22mm)	S (26mm)	S (25mm)	R (14mm)	R (19mm)	R (17mm)	S (25mm)	25	7	0
120	C16S6B2	Providencia spp.	R	R	R	22mm S	R	R	R	R	11mm R	R	9mm R	R	R	R	R	R	R	16mm S	R	R	R	R	R (19mm) (I)	R (20mm) (I)	R (11mm)	R (17mm)	S (31mm)	S (25mm)	R (14mm)	R (18mm)	R (21mm) (I)	S (23mm)	26	6	0
121	C16S6B3	Providencia spp.	R	R	11mm R	15mm R	R	19mm R	R	R	R	12mm R	16mm R	18mm S	R	12mm R	19mm S	R	R	11mm S	R	R	R	R	S (21mm)	S (31mm)	R (19mm) (I)	S (26mm)	S (27mm)	S (32mm)	R (18mm) (I)	S (25mm)	S (26mm)	S (21mm)	21	11	0
122	C17S1B1	Providencia vermicola	R	R	R	15mm R	R	16mm R	R	R	R	11mm R	16mm R	15mm I	R	R	17mm S	R	R	10mm S	R	R	R	R	S (23mm)	S (33mm)	S (21mm)	S (26mm)	S (33mm)	S (31mm)	S (23mm)	S (29mm)	S (30mm)	S (30mm)	20	12	0
123	C17S1B2	Providencia spp.	R	R	14mm I	14mm R	R	16mm R	R	R	R	10mm R	16mm R	15mm I	R	10mm R	17mm S	R	R	10mm S	R	R	R	R	S (21mm)	S (26mm)	R	S (26mm)	S (27mm)	S (32mm)	R (15mm)	R (23mm) (I)	S (27mm)	R (16mm) (I)	24	8	0
124	C17S3B1	Providencia spp.	R	R	R	17mm R	R	R	R	R	10mm R	10mm R	19mm R	12mm R	R	R	R	R	R	12mm S	R	R	R	R	S (26mm)	S (30mm)	R (19mm) (I)	S (28mm)	S (31mm)	S (32mm)	S (21mm)	S (29mm)	S (27mm)	S (24mm)	22	10	0
125	C17S3B2	Providencia manganoxydans	R	R	R	15mm R	R	16mm R	R	R	R	11mm R	15mm R	16mm I	R	11mm R	15mm I	R	R	9mm R	R	R	R	R	S (23mm)	S (30mm)	R (12mm)	S (28mm)	S (30mm)	S (31mm)	R (20mm) (I)	S (27mm)	S (24mm)	S (26mm)	24	8	0
126	C17S5B1	Morganella morganii	IR	R	R	12mm R	IR	R	R	R	R	R	14mm R	15mm I	R	R	R	R	IR	R	R	20mm S	R	R	R	S (29mm)	R	S (28mm)	R	R (14mm)	S (21mm)	R (19mm)	R (18mm)	R (11mm)	28	4	0
127	C17S5B2	Providencia vermicola	R	R	R	15mm R	R	20mm R	R	R	R	13mm R	16mm R	R	R	10mm R	20mm S	R	R	10mm S	R	R	R	10mm R	S (24mm)	S (33mm)	S (26mm)	S (27mm)	S (33mm)	S (32mm)	S (24mm)	S (34mm)	S (32mm)	S (32mm)	20	12	0
128	C17S6B1	Providencia spp.	R	R	R	11mm R	R	15mm R	R	R	R	9mm R	14mm R	12mm R	R	R	16mm I	R	R	10mm S	R	R	R	R	S (21mm)	S (29mm)	R (14mm)	S (25mm)	S (25mm)	S (29mm)	R (10mm)	R (23mm) (I)	S (24mm)	S (19mm)	24	8	0
129	C17S6B2	Providencia spp.	R	R	15mm I	8mm R	R	R	R	R	R	R	16mm R	R	R	R	R	R	R	8mm R	R	R	R	R	R (15mm)	S (28mm)	R	S (23mm)	S (27mm)	S (28mm)	R (12mm)	R (13mm)	R (11mm)	S (21mm)	27	5	0
130	C17S7B1	Providencia vermicola	R	R	R	R	14mm R	R	R	R	20mm R	17mm S	28mm S	R	R	18mm S	R	R	19mm S	18mm S	R	25mm S	R	R	R (20mm) (I)	S (34mm)	R	S (25mm)	S (25mm)	S (27mm)	R (17mm)	R (20mm)	R (19mm)	S (20mm)	21	11	0
131	C18S1B1	Providencia vermicola	R	R	R	R	R	R	R	R	R	R	17mm R	R	R	R	R	R	R	R	R	R	R	R	R (14mm)	S (28mm)	R	S (26mm)	R (15mm)	R (15mm)	R	R (12mm)	R (12mm)	R (18mm) (I)	30	2	0
132	C18S3B1	Morganella morganii	IR	R	R	11mm R	IR	14mm R	R	R	13mm R	14mm S	15mm R	17mm S	R	13mm R	12mm R	R	IR	R	R	R	R	R	R (20mm) (I)	S (28mm)	R (12mm)	S (27mm)	S (28mm)	S (33mm)	S (21mm)	R (25mm) (I)	S (27mm)	R	25	7	0
133	C18S3B2	Providencia vermicola	R	R	R	15mm R	R	22mm R	R	R	R	R	17mm R	15mm I	R	10mm R	20mm S	R	R	10mm S	R	R	R	R	S (24mm)	S (32mm)	S (25mm)	S (22mm)	S (34mm)	S (33mm)	S (22mm)	S (32mm)	S (31mm)	S (31mm)	20	12	0
134	C18S5B1	Providencia vermicola	R	R	R	15mm R	R	20mm R	R	R	19mm R	11mm R	20mm R	15mm I	R	11mm R	20mm S	R	R	12mm S	R	R	R	R	S (22mm)	S (30mm)	R (18mm) (I)	S (26mm)	S (27mm)	S (30mm)	R (17mm)	R (24mm) (I)	S (26mm)	S (19mm)	23	9	0
135	C18S6B1	Morganella morganii	IR	R	17mm S	R	IR	15mm R	R	R	13mm R	14mm S	13mm R	20mm S	R	13mm R	15mm I	R	IR	R	R	R	R	R	R (20mm) (I)	S (30mm)	R (11mm)	S (26mm)	S (26mm)	S (33mm)	R (18mm) (I)	S (27mm)	S (28mm)	S (21mm)	22	10	0
136	C18S6B2	Providencia vermicola	R	R	R	14mm R	R	18mm R	R	R	R	10mm R	14mm R	17mm S	R	10mm R	17mm S	R	R	10mm S	R	R	R	10mm R	S (24mm)	S (32mm)	R (18mm) (I)	S (27mm)	S (27mm)	S (33mm)	R (19mm) (I)	S (26mm)	S (25mm)	S (22mm)	21	11	0
137	C19S1B1	Morganella morganii	IR	20mm S	27mm S	10mm R	IR	22mm R	21mm S	26mm	18mm R	13mm R	30mm S	11mm R	22mm S	13mm R	21mm S	R	IR	17mm S	12mm R	21mm S	R	17mm S	S (22mm)	S (27mm)	R	S (28mm)	R (19mm) (I)	R (19mm) (I)	R (20mm) (I)	R (16mm)	R (14mm)	R (18mm) (I)	19	12	1
138	C19S1B2	Escherichia coli	R	11mm R	R	R	9mm R	9mm R	14mm S	R	R	20mm S	13mm R	14mm R	R	10mm R	R	R	11mm R	15mm S	R	10mm R	R	11mm R	R (19mm) (I)	S (36mm)	R	S (26mm)	S (22mm)	S (31mm)	R (17mm)	R (21mm)	R (17mm)	R (15mm)	25	7	0
139	C19S1B3	Escherichia coli	R	11mm R	R	R	R	R	R	R	15mm R	11mm R	19mm R	11mm R	R	10mm R	R	R	9mm R	18mm S	R	14mm R	R	9mm R	R (19mm) (I)	S (29mm)	R	S (23mm)	R	S (26mm)	R (11mm)	R (16mm)	R (14mm)	R (11mm)	28	4	0
140	C19S2B2	Klebsiella pneumoniae	IR	16mm S	24mm S	R	12mm I	R	10mm R	9mm	20mm R	17mm S	27mm S	18mm S	R	18mm S	R	R	18mm I	16mm S	R	22mm S	R	10mm R	R (16mm) (I)	S (35mm)	R	S (27mm)	R (19mm) (I)	R (21mm) (I)	R (19mm) (I)	R (17mm)	R (14mm)	S (19mm)	20	11	1	1
141	C19S3B1	Klebsiella quasipneumoniae	R	R	13mm R	10mm R	R	13mm R	15mm S	R	11mm R	10mm R	14mm R	15mm I	R	R	12mm R	R	R	R	R	R	R	14mm S	S (26mm)	S (32mm)	R (20mm) (I)	S (27mm)	R	S (33mm)	S (23mm)	S (31mm)	S (24mm)	S (23mm)	22	10	0
142	C19S3B2	Morganella morganii	IR	11mm R	22mm S	R	IR	11mm R	17mm S	R	17mm R	13mm R	20mm R	16mm I	R	11mm R	11mm R	R	IR	15mm S	R	10mm R	R	17mm S	S (25mm)	S (26mm)	R (14mm)	R (21mm) (I)	S (24mm)	S (33mm)	R (12mm)	R (24mm) (I)	S (26mm)	R (15mm)	22	10	0
143	C19S3B3	Escherichia coli	R	R	25mm S	R	R	R	10mm R	R	15mmR	R	28mm S	9mm R	R	R	R	R	R	R	R	10mm R	R	11mm R	R (20mm) (I)	S (30mm)	R (11mm)	S (28mm)	S (27mm)	S (32mm)	R (20mm) (I)	R (25mm) (I)	S (26mm)	R	25	7	0
144	C19S3B4	Aeromonas veronii	R	14mm S	17mm S	R	R	17mm R	11mm R	11mm	16mm R	11mm R	11mm R	12mm R	R	10mm R	15mm I	R	R	R	R	R	R	12mm R	S (23mm)	S (24mm)	S (30mm)	R (17mm)	S (33mm)	S (30mm)	S (26mm)	S (31mm)	S (33mm)	R	21	10	1
145	C19S4B1	Morganella morganii	IR	10mm R	11mm R	20mm I	IR	R	R	R	10mm R	10mm R	14mm R	12mm R	R	12mm R	R	R	IR	R	R	R	R	11mm R	R (14mm)	S (28mm)	R	S (29mm)	R (20mm) (I)	S (25mm)	R (20mm) (I)	R (20mm)	R (12mm)	S (29mm)	28	4	0
146	C19S4B2	Enterobacter cloacae	IR	R	16mm I	R	R	R	9mm R	R	10mm R	R	R	14mm R	R	10mm R	R	R	9mm R	14mm S	R	10mm R	R	R	R	R (12mm)	R	R	R (12mm)	R (11mm)	R	R	R	S (26mm)	30	2	0
147	C19S4B3	Aeromonas veronii	R	14mm S	26mm S	R	R	18mm R	12mm I	11mm	R	10mm R	12mm R	10mmR	R	11mm R	14mm I	R	10mm R	R	R	R	R	11mm R	S (22mm)	S (28mm)	S (21mm)	S (22mm)	S (38mm)	S (35mm)	S (26mm)	S (30mm)	S (27mm)	S (26mm)	19	12	1
148	C19S5B1	Klebsiella pneumoniae	IR	15mm S	20mm S	R	R	14mm R	16mm S	R	20mm R	14mm S	24mm S	16mm I	R	12mm R	10mm R	R	R	15mm S	R	26mm S	12mm I	10mm R	R (10mm)	S (28mm)	R	S (27mm)	R (18mm) (I)	R (17mm)	R (19mm) (I)	R	R	R (17mm) (I)	23	9	0	1
149	C19S5B2	Morganella morganii	IR	R	22mm S	R	IR	R	12mm I	R	14mm R	R	16mm R	15mm I	R	12mm R	R	R	IR	15mm S	R	20mm S	R	10mm R	R (10mm)	S (28mm)	R	S (26mm)	S (23mm)	R	S (23mm)	R (20mm)	S (16mm)	S (25mm)	23	9	0
150	C19S5B3	Aeromonas veronii	R	16mm S	26mm S	R	9mm R	20mm R	11mm R	10mm	22mm I	11mm R	16mm R	11mm R	R	11mm R	17mm S	R	11mm R	R	R	R	R	14mm S	R (16mm) (I)	S (26mm)	R (15mm)	R (21mm) (I)	S (37mm)	S (33mm)	S (23mm)	S (27mm)	S (23mm)	R (11mm)	21	10	1
151	C19S5B4	Aeromonas veronii	R	11mm R	20mm S	R	R	15mm R	12mm I	R	22mm I	R	15mm R	R	12mm R	R	R	R	11mm R	R	R	R	R	R	R (14mm)	S (26mm)	R (12mm)	R (20mm) (I)	S (35mm)	S (33mm)	R (20mm) (I)	S (26mm)	R (22mm) (I)	S (19mm)	26	6	0
152	C19S6B1	Escherichia coli	R	15mm S	27mm S	R	R	12mm R	13mm S	R	18mmR	R	26mm S	R	R	R	12mm R	R	11mm R	20mm S	R	21mm S	R	14mm S	S (21mm)	S (29mm)	S (26mm)	S (25mm)	R	S (29mm)	S (27mm)	S (31mm)	S (25mm)	R (15mm)	17	15	0
153	C19S6B2	Klebsiella pneumoniae	IR	R	17mm S	R	9mm R	R	R	R	11mm R	R	24mm S	R	R	11mm R	R	R	11mm R	13mm S	R	14mm R	R	R	R (12mm)	S (28mm)	R	S (26mm)	R (15mm)	R (20mm) (I)	R (15mm)	R (15mm)	R (10mm)	R (11mm)	27	5	0	1
154	C19S6B3	Proteus mirabilis	R	R	R	20mm I	IR	13mm R	R	R	R	R	14mm R	R	R	R	13mm R	R	IR	14mm S	R	R	R	IR	S(26mm)	S(30mm)	R(19mm)	S(27mm)	S(32mm)	S(31mm)	R	S(28mm)	S(28mm)	S(26mm)	23	9	0
155	C19S7B1	Morganella morganii	IR	R	21mm S	R	IR	R	12mm I	R	R	R	13mm R	15mm I	R	11mm R	12mm R	R	IR	15mm S	R	22mm S	R	12mm R	S(21mm)	S(27mm)	R(16mm)	S (23mm)	S (23mm)	S (27mm)	S (21mm)	R(24mm)	R(21mm)	S(24mm)	22	10	0
156	C19S7B2	Morganella morganii	IR	R	R	R	IR	20mm R	15mm S	R	18mm R	12mm R	27mm S	15mm I	R	13mm R	22mm S	R	IR	20mm S	R	20mm S	R	18mm S	R (14mm)	S (32mm)	R (10mm)	S (31mm)	S (23mm)	R (22mm) (I)	R (18mm) (I)	R (16mm)	R (15mm)	S (22mm)	22	10	0
157	C20S1B2	Escherichia coli	R	20mm S	26mm S	R	R	24mm I	R	10mm	26mm S	14mm S	28mm S	16mm I	R	13mm R	24mm S	R	12mm R	18mm S	R	25mm S	14mm I	11mm R	S (25mm)	S (29mm)	S (24mm)	S (26mm)	S (29mm)	S (31mm)	S (25mm)	S (32mm)	S (24mm)	S (28mm)	13	18	1
158	C20S2B1	Pseudomonas aeruginosa	IR	R	IR	R	10mm R	R	R	R	R	R	R	R	R	R	R	R	15mm I	R	R	R	IR	IR	R	R	R	R	R	R	R	R	R	R	32	0	0
159	C20S2B2	Klebsiella pneumoniae	IR	14mm S	17mm S	R	9mm R	R	9mm R	R	19mm R	9mm R	28mm S	R	R	12mm R	R	R	11mm R	10mm S	9mmR	23mm S	R	R	R (11mm)	S (29mm)	R	S (25mm)	R (12mm)	R (19mm) (I)	R (12mm)	R (12mm)	R (10mm)	R (15mm)	25	7	0	1
160	C20S3B1	Proteus mirabilis	R	14mm S	R	R	IR	R	9mm R	R	11mm R	R	21mm S	R	R	11mm R	R	R	IR	16mm S	R	R	R	IR	S (26mm)	R (21mm) (I)	R (17mm)	R (17mm)	S (34mm)	S (25mm)	R (14mm)	S (28mm)	S (26mm)	S (19mm)	23	9	0
161	C20S3B2	Klebsiella pneumoniae	IR	R	14mm I	R	10mm R	R	R	R	20mm R	R	25mm S	R	R	9mm R	R	R	14mm I	30mm S	R	26mm S	R	R	R (10mm)	S (30mm)	R	S (23mm)	R (14mm) (I)	R (20mm) (I)	R (13mm)	R (13mm)	R	R (12mm)	27	5	0	1
162	C20S3B3	Morganella morganii	IR	R	25mm S	R	IR	10mm R	R	R	20mm R	R	14mm R	21mm S	R	14mm I	R	R	IR	20mm S	R	28mm S	R	12mm R	R (19mm) (I)	S (30mm)	R (10mm)	S (27mm)	S (27mm)	S (31mm)	R (18mm) (I)	S (25mm)	S (25mm)	S (20mm)	21	11	0
163	C20S4B1	Escherichia coli	R	R	R	R	10mm R	28mm S	R	R	26mm S	16mm S	30mm S	18mm S	R	13mm R	26mm S	R	12mm R	R	R	27mm S	R	R	R (14mm)	S (33mm)	R	S (29mm)	R (18mm) (I)	R (20mm) (I)	R (17mm)	R (15mm)	R (11mm)	S (21mm)	22	10	0
164	C20S4B2	Escherichia coli	R	23mm S	30mm S	R	R	R	14mm S	12mm	R	13mm R	30mm S	19mm S	R	14mm I	R	R	11mm R	25mm S	R	25mm S	R	13mm I	S (28mm)	S (35mm)	S (26mm)	S (30mm)	S (32mm)	S (36mm)	S (28mm)	S (34mm)	S (32mm)	S (30mm)	14	17	1
165	C20S5B1	Escherichia coli	R	16mm S	22mm S	R	R	R	R	R	R	11mm R	R	18mm S	R	14mm I	R	R	11mm R	R	R	24mm S	16mm S	R	R (10mm)	S (28mm)	R	R (17mm)	R (18mm) (I)	R (22mm) (I)	R	R	R	R	26	6	0
166	C21S5B2	Proteus mirabilis	R	9mm R	16mm I	17mm R	IR	15mm R	R	R	10mm R	9mm R	13mm R	R	R	11mm R	15mm I	R	IR	15mm S	R	R	R	IR	S (23mm)	S (31mm)	S (25mm)	S (30mm)	S (28mm)	S (31mm)	S (25mm)	S (30mm)	S (30mm)	S (28mm)	21	11	0
167	C21S7B1	Citrobacter freundii	IR	R	15mm I	R	R	11mm R	14mm S	R	15mm R	9mm R	15mm R	10mmR	R	9mm R	10mm R	R	10mm R	R	R	25mm S	R	15mm S	S(21mm)	S(27mm)	R(17mm)	S (26mm)	S (26mm)	S(28mm)	S(24mm)	S(26mm)	S(28mm)	S (20mm)	20	12	0
168	C21S7B2	Escherichia coli	R	R	11mm R	R	R	R	R	R	15mmR	10mm R	21mm S	14mm R	R	11mm R	R	R	10mm R	16mm S	R	15mm I	R	10mm R	S(30mm)	S (32mm)	S(26mm)	S (29mm)	S (33mm)	S(32mm)	S (26mm)	S(31mm)	S(29mm)	S (29mm)	20	12	0
169	C21S5B1	Proteus mirabilis	R	11mm R	R	R	IR	11mm R	17mm S	R	10mm R	11mm R	17mm R	9mm R	R	10mm R	15mm I	R	IR	15mm S	10mm R	27mm S	R	IR	R (16mm) (I)	S (29mm)	R	S (28mm)	R	R	R	R	R	R	27	5	0
170	C21S6B2	Escherichia coli	R	20mm S	18mm S	R	R	16mm R	16mm S	R	14mm R	12mm R	11mm R	16mm I	15mm I	11mm R	11mm R	R	10mm R	14mm S	11mm R	R	14mm I	11mm R	S (24mm)	S (28mm)	S (22mm)	S (28mm)	R (20mm) (I)	R (22mm) (I)	S (26mm)	R (11mm)	R (18mm)	R	23	9	0
171	C21S1B1	Klebsiella pneumoniae	IR	16mm S	17mm S	9mm R	R	13mm R	11mm R	R	12mm R	20mm S	15mm R	9mm R	13mm R	8mm R	15mm I	R	R	11mm S	11mm R	20mm S	R	9mm R	R (13mm)	S (29mm)	R	S (26mm)	R (16mm)	R (15mm)	R (12mm)	R (13mm)	R (10mm)	R	25	7	0	1
172	C22S1B1	Morganella morganii	IR	20mm S	24mm S	R	IR	24mm I	18mm S	R	13mm R	19mm S	14mm R	18mm S	R	19mm S	17mm S	R	IR	16mm S	R	18mm S	R	15mm S	R (17mm) (I)	S (29mm)	R (20mm) (I)	S (23mm)	S (22mm)	S (29mm)	R (17mm)	S (26mm)	S (23mm)	R (18mm) (I)	16	16	0
173	C22S1B2	Escherichia coli	R	13mm S	19mm S	20mm I	14mm I	R	12mm I	R	20mmR	14mm S	25mm S	20mm S	R	12mm R	R	R	10mm R	18mm S	R	25mm S	14mm I	14mm S	R	S (29mm)	R	R (19mm) (I)	R (13mm)	R (19mm) (I)	R	R	R	R	23	9	0
174	C22S2B1	Escherichia coli	R	15mm S	18mm S	17mm R	14mmI	R	11mm R	R	22mm I	15mm S	17mm R	21mm S	R	20mm S	R	R	17mm I	15mm S	R	11mm R	14mm I	15mm S	R	R (14mm)	R	R	R	R	R	R	R	R	25	7	0
175	C22S2B2	Acinetobactor baumanii	IR	10mm R	IR	R	15mm I	R	10mm R	R	16mm R	11mm R	20mm R	16mm I	R	16mm S	15mm I	R	18mm I	10mm S	R	R	IR	R	R	R (15mm)	R	R	R	R	R	R	R	R	30	2	0
176	C22S3B1	Klebsiella pneumoniae	IR	R	22mm S	17mm R	14mm I	18mm R	R	R	R	R	27mm S	17mm S	R	16mm S	14mm I	R	15mm I	17mm S	10mm R	18mm S	R	10mm R	R (10mm)	S (31mm)	R	S (27mm)	R (16mm)	R (19mm) (I)	R(14mm)	R (14mm)	R (10mm)	R (16mm) (I)	24	8	0	1
177	C22S4B1	Escherichia coli	R	17mm S	19mm S	R	16mmI	R	R	R	26mm S	12mm R	25mm S	18mm S	R	17mm S	R	R	20mm S	19mm S	R	24mm S	18mm S	14mm S	R (20mm) (I)	S (34mm)	R	S (29 mm)	S (22mm)	S (30mm)	R (13mm)	R (19mm)	R (16mm)	R (11mm)	17	15	0
178	C22S5B1	Escherichia coli	R	15mm S	17mm S	R	14mmI	R	R	R	27mm S	17mm S	22mm S	21mm S	R	15mm I	R	R	18mm I	20mm S	R	22mm S	16mm S	14mm S	R (12mm)	S (32mm)	S (23mm)	S (27mm)	S (25mm)	S (29mm)	S (24mm)	S (27mm)	S (27mm)	S (27mm)	13	19	0
179	C22S6B1	Escherichia coli	R	R	15mm I	R	R	R	R	R	R	10mm R	R	12mm R	R	11mm R	R	R	9mm R	15mm S	R	R	R	R	R	R (12mm)	R	R	R	R	R	R	R	R (14mm)	31	1	0
180	C22S6B2	Pseudomonas putida	R	R	24mm S	19mm R	14mm I	R	15mm S	R	16mm	18mm S	26mm S	11mm R	R	12mm R	15mm I	R	17mm I	R	R	12mm R	R	R	R	R (16mm)	R	R	R (14mm)	R (11mm)	R	R	R	R	27	4	1
181	C22S7B1	Citrobacter freundii	IR	R	18mm S	11mm R	R	R	R	R	21mm I	R	28mm S	11mm R	R	11mm R	13mm R	R	13mm R	10mm S	R	18mm S	R	R	R (15mm)	S (32mm)	R	S (28mm)	S (22mm)	R (21mm) (I)	S (22mm)	R (15mm)	R (14mm)	S (20mm)	23	9	0
182	C22S7B2	Citrobacter freundii	IR	R	19mm S	8mm R	R	R	R	R	19mm R	R	22mm S	10mmR	R	15mm I	14mm I	R	10mm R	17mm S	R	20mm S	R	R	R (15mm)	S (32mm)	R	S (29mm)	S (22mm)	R (23mm) (I)	S (22mm)	R (17mm)	R (16mm)	S (20mm)	23	9	0
183	C23S1B1	Morganella morganii	IR	16mm S	18mm S	R	IR	23mm I	20mm S	15mm	22mm I	13mm R	20mm R	10mmR	20mm S	11mm R	20mm S	R	IR	20mm S	R	R	11mm R	15mm S	R (16mm) (I)	S (36mm)	R	S (28mm)	S (22mm)	R (15mm)	S (21mm)	R (20mm)	R (19mm)	S (23mm)	19	12	1
184	C23S1B2	Escherichia coli	R	R	R	R	R	R	R	R	17mm R	10mm R	10mm R	R	R	R	R	R	9mm R	16mm S	R	R	10mm R	R	S (23mm)	S (35mm)	R (15mm)	S (31mm)	S (28mm)	S (33mm)	S (23mm)	S (30mm)	S (27mm)	S (22mm)	22	10	0
185	C23S2B1	Morganella morganii	IR	19mm S	18mm S	R	IR	23mm I	22mm S	R	20mm R	12mm R	19mm R	12mm R	21mm S	13mm R	18mm S	R	IR	16mm S	R	R	10mm R	16mm S	R (18mm) (I)	S (32mm)	R	S (28mm)	S (28mm)	S (29mm)	R (19mm) (I)	R (22mm)	R (22mm) (I)	R (18mm) (I)	21	11	0
186	C23S2B2	Klebsiella pneumoniae	IR	R	20mm S	R	R	R	R	R	15mm R	10mm R	20mm R	R	R	R	R	R	R	15mm S	R	17mm I	R	R	R (11mm)	S (28mm)	R	S (27mm)	R (13mm)	R (18mm)	R (14mm)	R (12mm)	R (10mm)	R (13mm)	28	4	0	1
187	C23S2B3	Escherichia coli	R	R	R	R	R	R	R	R	13mmR	10mm R	23mm S	14mm R	R	10mm R	R	R	11mm R	R	R	11mm R	R	R	R	S (32mm)	R (11mm)	S (28mm)	R (18mm) (I)	R (21mm) (I)	R	R	R	S (19mm)	28	4	0
188	C23S3B1	Providencia rettgeri	IR	22mm S	25mm S	10mm R	IR	24mm I	20mm S	15mm	21mm I	10mm R	15mm R	14mm R	20mm S	10mm R	20mm S	R	IR	10mm S	13mm R	20mm S	R	IR	S (23mm)	S (32mm)	R (10mm)	S (28mm)	S (32mm)	S (34mm)	R (17mm)	S (26mm)	S (30mm)	S (22mm)	17	15	0
189	C23S3B2	Escherichia coli	R	R	15mm I	R	R	R	8mm R	R	14mm R	11mm R	20mm R	14mm R	R	11mm R	R	R	9mm R	16mm S	R	13mm R	R	10mm R	R	S (31mm)	R	S (21mm)	R	R	R	R	R	S (27mm)	28	4	0
190	C23S4B1	Morganella morganii	IR	R	R	R	IR	R	R	R	R	R	11mm R	R	R	R	10mm R	R	IR	R	R	R	R	10mm R	S (22mm)	S (31mm)	R (11mm)	S (27mm)	S (22mm)	S (32mm)	R (17mm)	S (27mm)	S (26mm)	S (22mm)	24	8	0
191	C23S4B2	Morganella morganii	IR	R	R	R	IR	10mm R	R	R	11mm R	12mm R	11mm R	17mm S	R	11mm R	10mm R	R	IR	R	R	16mm I	R	25mm S	R (11mm)	R (18mm)	R	R (13mm)	R (15mm)	R (15mm)	R	R (10mm)	R	R	30	2	0
192	C23S4B3	Escherichia coli	R	R	R	R	R	R	R	R	14mm R	11mm R	20mm R	13mm R	R	11mm R	R	R	9mm R	15mm S	14mm I	9mm R	R	R	R (14mm)	S (28mm)	R	S (27mm)	S (22mm)	R (22mm) (I)	S (21mm)	R (14mm)	R (13mm)	R (12mm)	27	5	0
193	C23S5B1	Pseudomonas aeruginosa	IR	15mm S	IR	R	13mm I	28mm S	22mm S	R	20mm R	17mm S	24mm S	19mm S	22mm S	14mm I	19mm S	R	15mm I	15mm S	14mm I	22mm S	IR	IR	S (29mm)	S (32mm)	S (26mm)	S (31mm)	S (30mm)	S (30mm)	S (32mm)	S (32mm)	S (31mm)	R	13	19	0
194	C23S5B2	Pseudomonas aeruginosa	IR	12mm R	IR	R	12mm I	R	R	10mm	11mm R	12mm R	18mm R	14mm R	R	13mm R	R	R	13mm R	12mm S	R	13mm R	IR	IR	R	R	R	R	R	R	R	R	R	R	31	1	0
195	C23S5B3	Morganella morganii	IR	25mm S	22mm S	R	IR	R	19mm S	14mm	25mm S	19mm S	28mm S	15mm I	R	20mm S	R	R	IR	16mm S	R	23mm S	R	R	S (25mm)	S (34mm)	S (23mm)	S (29mm)	S (31mm)	S (32mm)	S (25mm)	S (31mm)	S (32mm)	S (29mm)	13	29	0
196	C23S6B1	Morganella morganii	IR	R	R	R	IR	R	R	R	R	R	18mm R	R	R	R	R	R	IR	16mm S	R	R	R	R	R (11mm)	S (35mm)	R	S (27mm)	R (19mm) (I)	R (22mm) (I)	R (12mm)	R (12mm)	R (13mm)	R	29	3	0
197	C23S6B2	Escherichia coli	R	R	20mm S	R	14mm I	R	R	R	24mm I	R	25mm S	21mm S	R	24mm S	R	R	17mm I	20mm S	R	18mm S	R	R	R (11mm)	S (32mm)	R	S (27mm)	R (18mm) (I)	R (17mm)	R (18mm) (I)	R (12mm)	R (10mm)	R (17mm) (I)	24	8	0
198	C23S6B3	Escherichia coli	R	R	22mm S	R	13mm I	R	R	R	17mm R	18mm S	22mm S	21mm S	R	22mm S	R	R	14mm I	20mm S	R	21mm S	R	R	R (13mm)	S (34mm)	R	S (28mm)	R (19mm) (I)	R (19mm) (I)	R (19mm) (I)	R (13mm)	R (11mm)	R (17mm) (I)	23	9	0
199	C23S7B1	Escherichia coli	R	17mm S	16mm I	R	R	20mm R	19mm S	20mm	16mm R	12mm R	15mm R	12mm R	19mm S	12mm R	15mm I	R	R	17mm S	16mm S	R	R	R	S (24mm)	S (35mm)	R (16mm)	S (31mm)	S (30mm)	S (34mm)	S (23mm)	S (29mm)	S (29mm)	S (20mm)	17	14	1
200	C24S1B1	Morganella morganii	IR	R	20mm S	15mm R	IR	18mm R	R	R	R	14mm S	10mm R	18mm S	R	12mm R	16mm I	R	IR	R	R	20mm S	R	14mm S	S (26mm)	S (30mm)	S (22mm)	S (27mm)	S (32mm)	S (34mm)	S (27mm)	S (28mm)	S (31mm)	S (27mm)	17	15	0
201	C24S1B2	Providencia rettgeri	IR	R	21mm S	18mm R	IR	12mm R	R	R	20mm R	12mm R	14mm R	R	R	12mm R	12mm R	R	IR	R	R	R	R	IR	S (28mm)	S (32mm)	S (22mm)	S (31mm)	S (34mm)	S (38mm)	S (25mm)	S (32mm)	S (32mm)	S (28mm)	21	11	0
202	C24S2B1	Klebsiella pneumoniae	IR	R	18mm S	R	6mm R	R	R	R	8mm R	12mm R	16mm R	12mm R	R	12mm R	R	R	10mm R	13mm S	R	22mm S	R	R	R (20mm) (I)	S (31mm)	R (12mm)	S (28mm)	R (11mm)	S (26mm)	R (10mm)	R (22mm)	R (18mm)	S (20mm)	25	7	0	1
203	C24S2B2	Escherichia coli	R	R	R	6mm R	6mm R	R	6mm R	R	20mm R	12mm R	18mm R	14mm R	R	12mm R	R	R	10mm R	22mm S	R	15mm I	14mm I	10mm R	S (23mm)	S (35mm)	R	S (29mm)	R (18mm) (I)	S (32mm)	R (14mm)	R (21mm)	R (17mm)	R (11mm)	27	5	0
204	C24S3B1	Providencia spp.	R	R	R	R	R	R	R	R	14mm R	10mm R	6mm R	R	R	6mm R	R	R	R	10mm S	R	12mm R	R	R	S (25mm)	S (29mm)	R (17mm)	S (22mm)	S (25mm)	S (30mm)	R (18mm) (I)	S (27mm)	S (25mm)	S (20mm)	23	9	0
205	C24S3B2	Escherichia coli	R	R	R	R	R	R	R	R	R	R	R	R	R	R	R	R	6mm R	10mm S	R	10mm R	R	R	R	R (11mm)	R	R	R	R	R	R	R	R	31	1	0
206	C24S5B1	Citrobacter werkmanii	R	R	20mm S	R	6mm R	R	R	R	16mm R	R	R	R	R	10mm R	R	R	8mm R	R	R	8mm R	R	R	R (11mm)	R (21mm) (I)	R	R (12mm)	S (30mm)	R (20mm) (I)	R	R (12mm)	R (11mm)	R	30	2	0
207	C24S5B2	Pseudomonas aeruginosa	IR	R	IR	R	16mm I	R	R	R	R	R	27mm S	R	R	14mm I	R	R	22mm S	R	R	R	IR	IR	R (14mm)	R (22mm) (I)	R	R	S (30mm)	R (15mm)	R (18mm) (I)	R (13mm)	R	R	29	3	0
208	C24S4B1	Citrobacter werkmanii	R	R	22mm S	R	R	R	10mm R	R	20mm R	14mm S	19mm R	16mm I	R	12mm R	R	R	10mm R	18mm S	R	14mm R	23mm S	R	S (26mm)	S (32mm)	R (15mm)	S (26mm)	S (33mm)	S (31mm)	R (20mm) (I)	S (26mm)	S (26mm)	S (22mm)	20	12	0
209	C24S4B2	Providencia rettgeri	IR	R	R	22mm S	IR	R	R	R	R	11mm R	R	17mm S	R	11mm R	R	R	IR	R	R	R	R	IR	S (33mm)	S (40mm)	S (22mm)	S (36mm)	S (38mm)	S (40mm)	S (23mm)	S (37mm)	S (37mm)	S (28mm)	20	12	0
210	C24S6B1	Alcaligenes spp.	R	R	20mm S	18mm R	11mm R	13mm R	R	R	22mm R	R	19mm R	R	R	R	R	R	16mm I	12mm S	R	14mm R	R	16mm S	S (21mm)	S (27mm)	R	S (25mm)	S (33mm)	R (14mm)	R	R	R (11mm)	R	25	7	0
211	C24S6B2	Citrobacter werkmanii	R	R	R	R	R	20mm R	R	R	21mm I	14mm S	14mm R	16mm I	R	13mm R	23mm S	R	R	17mm S	R	R	19mm S	R	S (27mm)	S (32mm)	R (16mm)	S (27mm)	S (32mm)	S (31mm)	S (23mm)	S (32mm)	S (29mm)	S (24mm)	19	13	0
212	C24S6B3	Citrobacter Spp.	R	R	23mm S	R	10mm R	12mm R	R	R	22mm I	13mm R	19mm R	18mm S	R	12mm R	21mm S	R	16mm I	10mm S	R	R	18mm S	R	S (30mm)	S (32mm)	R (18mm) (I)	S (22mm)	S (29mm)	S (33mm)	S (28mm)	S (26mm)	S (27mm)	S (20mm)	19	13	0
213	C24S7B1	Proteus vulgaris	IR	R	23mm S	21mm I	IR	18mm R	R	R	R	13mm R	12mm R	18mm S	R	14mm I	15mm I	R	IR	11mm S	R	R	R	IR	S (22mm)	S (30mm)	R (12mm)	S (26mm)	S (34mm)	S (33mm)	S (22mm)	R (25mm) (I)	S (28mm)	S (22mm)	21	11	0
214	C24S7B2	Morganella morganii	IR	R	15mm I	21mm I	IR	R	R	R	R	14mm S	R	18mm S	R	12mm R	17mm S	R	IR	12mm S	R	R	18mm S	R	S (24mm)	S (32mm)	R (18mm) (I)	S (27mm)	S (35mm)	S (33mm)	S (26mm)	S (27mm)	S (28mm)	S (22mm)	18	14	0
215	C24S7B3	Escherichia coli	R	R	R	R	R	R	R	R	14mm R	12mm R	17mm R	R	R	12mm R	R	R	10mm R	16mm S	R	12mm R	R	R	R (13mm)	S (31mm)	R	S (29mm)	R (19mm) (I)	R (18mm)	R (19mm) (I)	R (14mm)	R (10mm)	R (16mm) (I)	29	3	0
216	C25S1B1	Morganella morganii	IR	R	18mm S	15mm R	IR	18mm R	R	R	10mm R	12mm R	R	18mm S	R	12mm R	16mm I	R	IR	16mm S	R	20mm S	R	12mm R	R (13mm)	S (29mm)	R	S (27mm)	R (14mm)	R (17mm)	R (12mm)	R (11mm)	R	R (11mm)	26	6	0
217	C25S2B1	Morganella morganii	IR	R	R	23mm S	IR	14mm R	R	R	13mm R	13mm R	15mm R	17mm S	R	14mm I	22mm S	R	IR	14mm S	R	19mm S	R	R	S(22mm)	S(25mm)	R	S(23mm)	S(24mm)	S(32mm)	R(20mm) I	R	S(30mm)	S(22mm)	20	12	0
218	C25S2B2	Escherichia coli	R	R	14mm I	R	8mm R	R	R	R	R	R	R	R	R	24mm S	R	R	10mm R	R	R	12mm R	R	10mm R	R	R (14mm)	R	R	R (10mm)	R	R	R	R	R	31	1	0
219	C25S3B1	Providencia rettgeri	IR	R	15mm I	R	IR	R	R	R	10mm R	10mm R	16mm R	12mm R	R	R	R	R	IR	14mm S	R	11mm R	R	IR	S (26mm)	S (33mm)	S (21mm)	S (26mm)	S (31mm)	S (32mm)	S (21mm)	S (28mm)	S (31mm)	S (26mm)	21	11	0
220	C25S3B2	Escherichia coli	R	R	R	16mm R	R	R	R	R	R	R	10mm R	10mmR	R	R	R	R	11mm R	R	R	R	R	R	R (13mm)	S (33mm)	R	S (27mm)	R (20mm) (I)	R (20mm) (I)	R (17mm)	R (16mm)	R (12mm)	R (17mm) (I)	30	2	0
221	C25S4B1	Morganella morganii	IR	R	24mm S	18mm R	IR	20mm R	R	R	11mm R	16mm S	10mm R	18mm S	R	R	21mm S	R	IR	16mm S	R	20mm S	R	10mm R	S (28mm)	S (27mm)	R (20mm) (I)	S (27mm)	S (28mm)	S (27mm)	S (26mm)	S (30mm)	S (29mm)	S (26mm)	17	15	0
222	C25S4B2	Klebsiella pneumoniae	IR	R	11mm R	R	10mm R	R	10mm R	R	13mm R	R	12mm R	16mm I	10mm R	14mm I	R	R	12mm R	10mm S	R	15mm I	R	R	R (10mm)	R (22mm) (I)	R	R (13mm)	R (15mm)	R (18mm)	R	R (12mm)	R	R	31	1	0
223	C25S4B3	Escherichia coli	R	28mm S	20mm S	R	R	26mm S	R	R	20mm R	24mm S	16mm R	28mm S	20mm S	22mm S	26mm S	R	10mm R	20mm S	24mm S	26mm S	R	26mm S	S (23mm)	S (31mm)	R (16mm)	R (21mm) (I)	S (27mm)	S (32mm)	S (22mm)	S (26mm)	S (30mm)	R (18mm) (I)	13	19	0
224	C25S5B1	Morganella morganii	IR	R	17mm S	14mm R	IR	20mm R	R	R	13mm R	16mm S	R	18mm S	R	15mm I	21mm S	R	IR	16mm S	R	18mm S	R	12mm R	S (25mm)	S (31mm)	R (19mm) (I)	S (25mm)	S (29mm)	S (28mm)	S (24mm)	S (25mm)	S (27mm)	S (22mm)	17	15	0
225	C25S5B2	Klebsiella pneumoniae	IR	R	R	R	9mm R	R	R	R	9mm R	R	15mm R	R	R	9mm R	R	R	12mm R	10mm S	R	12mm R	R	R	S (22mm)	S (33mm)	S (22mm)	S (28mm)	S (29mm)	S (32mm)	S (22mm)	S (31mm)	S (29mm)	S (23mm)	21	11	0	1
226	C25S6B1	Morganella morganii	IR	R	R	R	IR	R	R	R	14mm R	R	13mm R	R	R	14mm I	R	R	IR	18mm S	R	R	R	R	R (13mm)	S (23mm)	R	R (20mm) (I)	S (22mm)	S (26mm)	R	R (16mm)	R (15mm)	R (13mm)	28	4	0
227	C25S6B2	Klebsiella pneumoniae	IR	R	R	22mm S	9mm R	R	R	R	10mm R	R	R	R	R	12mm R	R	R	13mm R	10mm S	R	14mm R	R	R	R (13mm)	R (20mm) (I)	R	R (13mm)	R (12mm)	R (20mm) (I)	R	R (15mm)	R	S (20mm)	29	3	0	1
228	C26S1B1	Escherichia coli	R	R	11mm R	R	11mm R	R	12mm I	R	R	15mm S	11mm R	13mm R	R	15mm I	R	R	13mm R	21mm S	R	13mm R	R	12mm R	R	R (14mm)	R	R	R	R	R	R	R	R	30	2	0
229	C26S2B1	Klebsiella pneumoniae	IR	R	11mm R	R	R	R	R	R	11mm R	11mm R	17mm R	12mm R	R	13mm R	R	R	12mm R	R	R	16mm I	15mm S	R	R (19mm) (I)	S (29mm)	R (11mm)	S (23mm)	R (11mm)	S (28mm)	R (11mm)	R (23mm) (I)	R (18mm)	R(16mm) (I)	28	4	0	1
230	C26S3B1	Providencia rettgeri	IR	R	R	18mm R	IR	R	R	R	R	12mm R	R	16mm I	R	12mm R	R	R	IR	12mm S	R	R	R	IR	S (34mm)	S (39mm)	S (22mm)	S (36mm)	S (40mm)	S (27mm)	S (24mm)	S (38mm)	S (38mm)	S (30mm)	21	11	0
231	C26S3B2	Klebsiella quasipneumoniae	R	R	R	R	R	R	R	R	13mm R	15mm S	13mm R	13mm R	R	15mm I	R	R	10mm R	R	R	28mm S	R	R	S (24mm)	S (33mm)	R (20mm) (I)	S (28mm)	S (30mm)	S (32mm)	S (23mm)	S (28mm)	S (30mm)	S (23mm)	21	11	0
232	C26S4B1	Morganella morganii	IR	R	17mm S	22mm S	IR	18mm R	R	R	13mm R	14mm S	14mm R	14mm R	R	14mm I	R	R	IR	17mm S	R	24mm S	R	13mm I	S (27mm)	S (33mm)	S (21mm)	S (27mm)	S (33mm)	S (35mm)	S (26mm)	S (33mm)	S (30mm)	S (28mm)	17	15	0
233	C26S5B1	Morganella morganii	IR	R	13mm R	R	IR	R	R	R	R	R	12mm R	13mm R	R	12mm R	R	R	IR	R	R	20mm S	R	R	S (26mm)	S (35mm)	S (25mm)	S (28mm)	S (32mm)	S (29mm)	S (25mm)	S (29mm)	S (32mm)	S (29mm)	21	11	0
234	C26S5B2	Escherichia coli	R	R	23mm S	25mm S	9mm R	R	R	R	R	R	14mm R	14mm R	R	14mm I	R	R	12mm R	18mm S	R	20mm S	13mm R	R	R	S (26mm)	R	R (14mm)	R (18mm) (I)	R (22mm) (I)	R	R	R	R	27	5	0
235	C26S5B3	Klebsiella quasipneumoniae	R	R	16mm I	24mm S	10mm R	R	R	R	R	R	R	R	R	10mm R	R	R	13mm R	16mm S	R	13mm R	R	R	R (11mm)	R (16mm)	R	R (13mm)	R (17mm)	R (16mm)	R	R	R	R	30	2	0
236	C26S6B1	Morganella morganii	IR	R	14mm I	R	IR	R	R	R	R	R	13mm R	15mm I	R	12mm R	R	R	IR	10mm S	R	20mm S	R	12mm R	S (21mm)	S (29mm)	S (25mm)	S (26mm)	S (32mm)	S (29mm)	S (26mm)	S (30mm)	S (30mm)	S (28mm)	20	12	0
237	C26S6B2	Escherichia coli	R	R	13mm R	27mm S	R	R	R	R	R	12mm R	19mm R	14mm R	R	12mm R	R	R	11mm R	R	R	14mm R	R	R	R (13mm)	S (33mm)	R	S (30mm)	R (20mm) (I)	R (20mm) (I)	R (18mm) (I)	R (15mm)	R (11mm)	R (17mm) (I)	29	3	0
238	C26S6B3	Aeromonas spp.	R	R	R	23mm S	18mm S	R	R	R	15mm R	R	21mm S	12mm R	R	15mm I	R	R	9mm R	10mm S	R	21mm S	R	R	S(20mm)	S(30mm)	R	S(27mm)	S(33mm)	S(35mm)	S(29mm)	S(37mm)	S(25mm)	R	19	13	0
239	C26S7B1	Alcaligenes spp.	R	R	19mm S	16mm R	10mm R	R	R	R	R	R	16mm R	R	R	R	R	R	14mm I	R	R	16mm I	R	13mm I	R(15mm)	S(27mm)	S (23mm)	S (26mm)	S (27mm)	R(13mm)	R	R(25mm)	R	S(27mm)	26	6	0
240	C26S7B2	Alcaligenes spp.	R	R	18mm S	16mm R	10mm R	10mm R	9mm R	R	R	R	17mm R	R	R	R	R	R	15mm I	13mm S	R	15mm I	R	12mm R	R(20mm)	R (22mm) (I)	R	R (20mm)	S (27mm)	R (12mm)	S(29mm)	R	R	R	28	4	0
241	C26S7B3	Citrobacter werkmanii	R	R	R	R	R	R	R	R	R	R	22mm S	12mm R	R	13mm R	R	R	12mm R	11mm S	R	18mm S	R	R	R (14mm)	S (28mm)	R	S (24mm)	R (12mm)	R (24mm) (I)	R	R (16mm)	R (12mm)	R	27	5	0
242	C27S5B3	Klebsiella pneumoniae	IR	R	R	22mm S	R	R	R	R	R	R	R	R	R	R	R	R	11mm R	R	R	13mm R	R	R	R (15mm)	R (18mm)	R	R (12mm)	R (12mm)	R (21mm) (I)	R	R (14mm)	R	R	31	1	0
243	C27S6B1	Morganella morganii	IR	15mm S	20mm S	R	IR	15mm R	16mm S	17mm	14mm R	11mm R	12mm R	15mm I	R	11mm R	R	R	IR	16mm S	14mm I	16mm I	R	R	R (10mm)	S (34mm)	R	S (27mm)	R (17mm)	R (22mm) (I)	R (11mm)	R (12mm)	R (14mm)	R (10mm)	25	7	1
244	C27S6B3	Aeromonas caviae	R	R	R	R	R	R	R	R	17mm R	10mm R	R	13mm R	R	11mm R	R	R	10mm R	10mm S	R	20mm S	R	9mm R	R (11mm)	S (32mm)	R	R (21mm) (I)	R (18mm) (I)	R (20mm) (I)	R	R	R	R	29	3	0
245	C27S7B1	Escherichia coli	R	R	17mm S	R	R	R	R	R	13mm R	R	13mm R	13mm R	R	R	R	R	11mm R	18mm S	R	16mm I	13mm R	R	R	S (37mm)	R	S (27mm)	R	R (12mm)	R	R	R	R	28	4	0
246	C28S1B1	Escherichia coli	R	R	16mm I	R	10mm R	R	R	R	12mm R	10mm R	20mm R	12mm R	R	10mm R	R	R	12mm R	14mm S	R	10mm R	R	R	R (11mm)	S (27mm)	R	R (19mm) (I)	R (19mm) (I)	R (23mm) (I)	R	R (11mm)	R	R	30	2	0
247	C28S1B2	Escherichia coli	R	R	14mm I	R	10mmR	R	R	R	12mm R	10mm R	20mm R	12mm R	R	10mm R	R	R	12mm R	16mm S	R	10mm R	R	R	R (14mm)	S (34mm)	R	S (28mm)	R (11mm)	R (16mm)	R (14mm)	R (10mm)	R	R (10mm)	29	3	0
248	C28S1B3	Escherichia coli	R	R	R	R	R	R	R	R	R	R	R	R	R	R	R	R	16mm R	R	R	R	R	R	R (11mm)	R (13mm)	R	S (29mm)	R (13mm)	R (19mm) (I)	R (15mm)	R (12mm)	R	S (19mm)	30	2	0
249	C28S2B1	Escherichia coli	R	R	15mm I	R	10mmR	R	R	R	14mm R	13mm R	14mm R	14mm R	R	12mm R	R	R	11mm R	17mm S	R	R	R	R	R (14mm)	S (28mm)	R	R (19mm) (I)	S (23mm)	S (25mm)	R (15mm)	R (25mm) (I)	S (24mm)	S (20mm)	26	6	0
250	C28S2B2	Klebsiella pneumoniae	IR	R	18mm S	R	10mm R	14mm R	8mm R	R	16mm R	12mm R	18mm R	14mm R	12mm R	10mm R	16mm I	R	12mm R	12mm S	R	12mm R	R	R	S (28mm)	S (29mm)	S (22mm)	S (29mm)	R (18mm) (I)	S (30mm)	R (19mm) (I)	R (11mm)	S (27mm)	S (22mm)	23	9	0
251	C28S2B3	Klebsiella pneumoniae	IR	R	20mm S	R	R	21mm R	9mm R	R	13mm R	11mm R	14mm R	15mm I	R	11mm R	20mm S	R	9mm R	14mm S	R	15mm I	R	10mm R	S (23mm)	S (29mm)	S (27mm)	S (29mm)	S (30mm)	S (31mm)	S (28mm)	S (33mm)	S (31mm)	S (33mm)	19	13	0
252	C28S3B1	Klebsiella quasipneumoniae	R	R	11mm R	R	R	R	R	R	12mm R	11mm R	13mm R	15mm I	R	10mm R	R	R	10mm R	R	R	22mm S	R	R	S (21mm)	S (30mm)	R (18mm) (I)	R (21mm) (I)	S (27mm)	S (31mm)	R (19mm) (I)	S (27mm)	S (27mm)	S (20mm)	24	8	0
253	C28S3B2	Escherichia coli	R	R	27mm S	R	10mmR	R	10mm R	R	22mm R	14mm S	23mm S	16mm I	R	12mm R	R	R	12mm R	22mm S	R	20mm S	R	10mm R	S (23mm)	S (29mm)	R	S (24mm)	S (32mm)	R (15mm)	R	R	R (15mm)	R	23	9	0
254	C28S4B1	Escherichia coli	R	R	R	R	10mmR	R	8mm R	R	20mm R	10mm R	20mm R	10mmR	R	10mm R	R	R	16mm I	16mm S	R	R	14mm I	R	S (21mm)	S (33mm)	R	S (27mm)	R	R (18mm)	R (12mm)	R (18mm)	R (17mm)	R (13mm)	28	4	0
255	C28S4B2	Escherichia coli	R	R	R	R	12mm I	R	10mm R	R	22mmR	10mm R	20mm R	12mm R	R	12mm R	R	R	14mm I	20mm S	R	21mm S	R	R	S (21mm)	S (33mm)	R	S (27mm)	S (21mm)	S (29mm)	R (13mm)	R (19mm)	R (16mm)	R	25	7	0
256	C28S4B3	Escherichia coli	R	R	R	R	12mm I	R	R	R	20mmR	12mm R	20mm R	R	R	12mm R	R	R	18mm I	20mm S	R	20mm S	18mm S	R	S (25mm)	S (35mm)	R	S (31mm)	S (25mm)	S (33mm)	R (18mm) (I)	R (21mm)	R (18mm)	R (13mm)	24	8	0
257	C28S5B1	Escherichia coli	R	R	17mm S	R	10mm R	R	11mm R	R	18mmR	17mm S	18mm R	18mm S	R	16mm S	R	R	13mm R	16mm S	R	30mm S	R	11mm R	S (22mm)	S (29mm)	S (25mm)	S (31mm)	S (32mm)	S (34mm)	S (25mm)	S (34mm)	S (29mm)	S (32mm)	16	16	0
258	C28S5B2	Escherichia coli	R	R	10mm R	R	R	R	10mm R	R	20mmR	10mm R	18mm R	10mmR	R	10mm R	R	R	R	16mm S	R	22mm S	R	R	R (15mm)	S (29mm)	R (10mm)	S (22mm)	S (26mm)	S (27mm)	S (23mm)	R (24mm) (I)	S (24mm)	S (21mm)	23	9	0
259	C28S6B1	Citrobacter freundii	IR	R	23mm S	R	10mm R	20mm R	R	R	20mm R	13mm R	19mm R	17mm S	R	14mm I	18mm S	R	11mm R	15mm S	R	14mm R	R	R	S (24mm)	S (31mm)	R (15mm)	S (26mm)	S (24mm)	S (28mm)	R (12mm)	R (24mm) (I)	R	S (21mm)	22	10	0
260	C28S6B2	Escherichia coli	R	R	17mm S	R	R	R	R	R	15mmR	11mm R	24mm S	13mm R	R	11mm R	R	R	11mm R	R	R	13mm R	R	R	R (13mm)	S (32mm)	R	S (28mm)	R (18mm) (I)	R (19mm) (I)	R (19mm) (I)	R (14mm)	R (11mm)	R (13mm)	28	4	0
261	C28S6B3	Escherichia coli	R	R	20mm S	R	10mm R	R	R	R	19mmR	R	R	R	R	13mm R	R	R	11mm R	20mm S	R	18mm S	R	10mm R	R	R (17mm)	R	R	S (23mm)	R (12mm)	R	R	R	R	28	4	0
262	C29S1B1	Morganella morganii	IR	R	22mm S	10mm R	IR	20mm R	R	R	10mm R	14mm S	R	16mm I	R	14mm I	18mm S	R	IR	14mm S	R	16mm I	R	16mm S	S (28mm)	S (27mm)	S (23mm)	S (25mm)	S (34mm)	S (31mm)	S (27mm)	S (31mm)	S (30mm)	S (26mm)	17	15	0
263	C29S1B2	Morganella morganii	IR	R	20mm S	R	IR	R	R	R	12mm R	12mm R	12mm R	R	R	10mm R	R	R	IR	20mm S	R	18mm S	R	R	S (27mm)	S (32mm)	S (24mm)	S (27mm)	S (35mm)	S (34mm)	R (20mm) (I)	S (32mm)	S (29mm)	S (19mm)	20	12	0
264	C29S2B1	Escherichia coli	R	R	R	R	8mm R	R	R	14mm	10mmR	12mm R	R	R	R	10mm R	R	R	12mm R	14mm S	R	16mm I	R	R	R (18mm) (I)	S (24mm)	S (23mm)	R (15mm)	S (29mm)	S (30mm)	S (23mm)	S (29mm)	S (26mm)	S (25mm)	22	9	1
265	C29S2B2	Klebsiella pneumoniae	IR	R	R	R	R	R	R	R	10mm R	12mm R	18mm R	8mm R	R	10mm R	R	R	8mm R	16mm S	R	18mm S	R	R	R (11mm)	S (28mm)	R	S (25mm)	R (15mm)	R (16mm)	R (14mm)	R (13mm)	R (10mm)	R (12mm)	28	4	0
266	C29S2B3	Acinetobactor baumanii	IR	R	IR	R	R	R	R	R	R	R	R	R	R	R	R	R	10mm R	R	R	10mm R	IR	R	R	R	R	R	R (13mm)	R (13mm)	R	R	R	R	32	0	0
267	C29S3B1	Klebsiella pneumoniae	IR	R	16mm I	R	12mm I	R	R	R	R	R	20mm R	R	R	12mm R	R	R	15mm I	R	R	18mm S	R	R	S(25mm)	S (34mm)	S(29mm)	S(32mm)	S(33mm)	S(33mm)	R	S(26mm)	R(21mm)	S(34mm)	23	9	0
268	C29S4B1	Citrobacter werkmanii	R	R	R	R	10mm R	R	8mm R	R	17mm R	12mm R	16mm R	14mm R	R	12mm R	R	R	13mm R	14mm S	R	10mm R	R	R	R (20mm) (I)	S (30mm)	R (10mm)	R (21mm) (I)	R	R (18mm)	R	R (20mm)	R (16mm)	R	30	2	0
269	C29S4B2	Klebsiella pneumoniae	IR	R	18mm S	R	10mm R	R	R	R	R	12mm R	10mm R	R	R	13mm R	R	R	15mm I	12mm S	R	14mm R	R	R	S (31mm)	S (29mm)	S (29mm)	S (30mm)	S (34mm)	S (34mm)	S (29mm)	S (34mm)	S (32mm)	S (29mm)	20	12	0
270	C29S4B3	Morganella morganii	IR	R	14mm I	R	IR	R	10mm R	R	10mm R	R	14mm R	8mm R	R	12mm R	R	R	IR	R	R	15mm I	R	15mm S	S (22mm)	S (29mm)	R (18mm) (I)	S (23mm)	S (28mm)	S (30mm)	S (22mm)	S (27mm)	S (27mm)	R (17mm) (I)	23	9	0
271	C29S5B1	Escherichia coli	R	R	R	R	12mm I	R	R	R	14mmR	R	22mm S	R	R	R	R	R	R	17mm S	R	21mm S	16mm S	R	R (11mm)	S (37mm)	R	S (31mm)	R (16mm)	R (18mm)	R (19mm) (I)	R (12mm)	R (10mm)	R (16mm) (I)	26	6	0
272	C29S6B1	Escherichia coli	R	R	18mm S	R	10mm R	R	R	R	13mmR	12mm R	16mm R	16mm I	R	12mm R	R	R	14mm I	12mm S	R	18mm S	R	R	R (18mm) (I)	S (28mm)	R	R (19mm) (I)	R (14mm)	R (20mm) (I)	R	R	R	R	28	4	0
273	C29S6B2	Proteus mirabilis	R	R	R	10mm R	IR	16mm R	R	R	R	R	R	R	R	R	14mm I	R	IR	15mm S	R	R	R	IR	R (14mm)	S (23mm)	R	S (23mm)	R (19mm) (I)	R (12mm)	R	R (11mm)	R (15mm)	R (12mm)	29	3	0
274	C29S6B3	Escherichia coli	R	R	17mm S	R	12mm I	R	R	R	21mmI	12mm R	17mm R	14mm R	R	13mm R	R	R	16mm I	17mm S	R	18mm S	R	R	S (21mm)	S (27mm)	R (15mm)	R (21mm) (I)	S (25mm)	S (27mm)	R (18mm) (I)	R (22mm)	S (22mm)	R (14mm)	24	8	0
275	C29S7B1	Pseudomonas putida	R	R	R	R	14mm I	R	R	R	R	R	R	R	R	10mm R	R	R	17mm I	R	R	R	R	R	R	R	R	R	R (19mm) (I)	R	R	R	R	R	32	0	0
276	C30S1B1	Morganella morganii	IR	R	R	R	IR	R	R	15mm	R	11mm R	R	13mm R	R	R	12mm R	R	IR	R	R	R	R	R	R (15mm)	S (33mm)	R (12mm)	S (28mm)	S (26mm)	S (26mm)	R (19mm) (I)	R (21mm)	R (19mm)	S (27mm)	26	5	1
277	C30S1B2	Escherichia coli	R	R	R	17mm R	R	R	R	R	R	R	10mm R	R	11mm R	R	R	R	R	12mm S	17mm S	R	R	R	S (27mm)	S (36mm)	R	S (30mm)	R	R (19mm) (I)	R (10mm)	R (20mm)	R (17mm)	R (14mm)	27	5	0
278	C30S1B3	Escherichia coli	R	R	R	13mm R	R	R	R	R	R	12mm R	10mm R	22mm S	12mm R	R	12mm R	R	R	R	13mm R	R	R	R	R (15mm)	S (32mm)	R (10mm)	S (30mm)	S (24mm)	R (23mm) (I)	S (21mm)	R (16mm)	R (14mm)	R (15mm)	27	5	0
279	C30S2B1	Klebsiella pneumoniae	IR	R	R	R	R	10mm R	R	R	R	R	13mm R	16mm I	12mm R	R	13mm R	R	R	13mm S	21mm S	R	14mm I	R	S (28mm)	S (35mm)	S (24mm)	S (30mm)	S (34mm)	S (34mm)	S (23mm)	S (29mm)	S (31mm)	S(27mm)	20	12	0
280	C30S2B2	Acinetobactor baumanii	IR	R	IR	R	R	12mm R	R	R	R	R	R	R	R	R	R	R	R	14mm S	12mm R	R	IR	R	R	R	R	R	R	R (13mm)	R	R	R	R	31	1	0
281	C30S2B3_1	Acinetobactor baumanii	IR	R	IR	R	R	12mm R	R	R	R	R	R	R	R	R	R	R	R	14mm S	R	R	IR	R	R	R (10mm)	R	R	R (12mm)	R (14mm)	R	R (10mm)	R	R	31	1	0
282	C30S2B3_2	Acinetobactor baumanii	IR	R	IR	R	11mm R	R	R	R	R	R	R	R	R	R	R	R	15mm I	R	R	R	IR	R	R	R	R	S (24mm)	R (10mm)	R	R	R	R	R	31	1	0
283	C30S3B1	Escherichia coli	R	R	R	13mm R	R	R	R	R	R	16mm S	R	R	R	R	R	R	R	R	R	R	R	R	R	R (13mm)	R	R	R	R	R	R	R	R	31	1	0
284	C30S3B2	Escherichia coli	R	R	16mm I	R	11mm R	10mm R	R	10mm	16mm R	R	R	R	R	R	12mm R	R	12mm R	14mm S	R	18mm S	R	R	R (17mm) (I)	S (30mm)	R	S (26mm)	R (19mm) (I)	S (27mm)	R (13mm)	R (18mm)	R (14mm)	R	26	5	1
285	C30S4B1	Providencia rettgeri	IR	R	R	R	IR	R	R	R	R	R	R	13mm R	14mm R	R	R	R	IR	R	R	R	R	IR	S (23mm)	S (30mm)	R (18mm) (I)	S (26mm)	S (25mm)	S (28mm)	R (19mm) (I)	S (26mm)	S (27mm)	S (19mm)	24	8	0
286	C30S4B2	Escherichia coli	R	R	14mm I	R	10mmR	R	R	R	18mm R	R	R	20mm S	13mm R	R	13mm R	R	12mm R	R	R	18mm S	R	R	R (13mm)	S (31mm)	R	S (27mm)	R (19mm) (I)	R (17mm)	R (17mm)	R (13mm)	R (11mm)	R (13mm)	28	4	0
287	C30S5B1	Escherichia coli	R	R	R	12mm R	R	11mm R	R	R	R	9mm R	R	R	R	R	R	R	R	13mm S	R	R	R	R	R	R (19mm)	R	R	R	R (12mm)	R	R	R	R	31	1	0
288	C30S5B2	Providencia rettgeri	IR	R	R	R	IR	R	R	R	R	R	R	10mmR	15mm I	R	R	R	IR	R	R	R	R	IR	R (19mm) (I)	S (30mm)	R (11mm)	S (24mm)	S (28mm)	S (32mm)	R (11mm)	R (23mm) (I)	S (25mm)	R (15mm)	26	5	0
289	C30S6B1	Escherichia coli	R	R	R	R	R	R	R	R	R	R	R	R	R	R	12mm R	R	R	R	R	R	R	R	S (25mm)	R (20mm) (I)	R	R (12mm)	R	R	R	R	R	R	31	1	0
290	C30S6B2	Escherichia coli	R	R	R	13mm R	R	R	R	R	R	10mm R	R	R	R	R	R	R	R	R	R	R	R	R	R	R (15mm)	R	R	R	R (11mm)	R	R	R	R	32	0	0
291	C31S1B1	Morganella morganii	IR	R	22mm S	10mm R	IR	21mm R	R	R	8mm R	12mm R	10mm R	14mm R	R	12mm R	20mm S	R	IR	12mm S	R	12mm R	12mm I	16mm S	R (18mm) (I)	S (27mm)	R (213	S (26mm)	S (25mm)	S (28mm)	S (21mm)	R (25mm) (I)	S (25mm)	S (19mm)	21	11	0
292	C31S2B1	Escherichia coli	R	R	R	R	12mm I	14mm R	10mm R	R	R	10mm R	18mm R	12mm R	R	10mm R	16mm I	R	14mm I	R	R	R	R	10mm R	S (30mm)	S (38mm)	S (31mm)	S (34mm)	S (33mm)	S (37mm)	S (34mm)	S (37mm)	S (34mm)	S (33mm)	22	10	0
293	C31S3B1_1	Citrobacter werkmanii	R	R	18mm S	R	8mm R	R	8mm R	R	14mm R	8mm R	12mm R	R	R	10mm R	R	R	12mm R	12mm S	R	10mm R	R	R	S (27mm)	S (34mm)	R (12mm)	S (31mm)	R	R (20mm) (I)	R (13mm)	R (24mm) (I)	R (21mm) (I)	R (14mm)	27	5	0
294	C31S3B1_2	Citrobacter werkmanii	R	10mm R	16mm I	R	10mm R	14mm R	10mm R	R	17mm R	10mm R	15mm R	14mm R	R	12mm R	12mm R	R	R	10mm S	R	20mm S	R	10mm R	S (22mm)	S (36mm)	S (27mm)	S (31mm)	S (32mm)	S (33mm)	S (31mm)	S (31mm)	S (29mm)	S (28mm)	20	12	0
295	C31S3B2	Klebsiella pneumoniae	IR	R	R	R	10mm R	R	R	R	10mm R	12mm R	R	R	R	10mm R	R	R	12mm R	10mm S	R	R	R	R	R (14mm)	R (19mm)	R	R (13mm)	R (14mm)	R (21mm)	R	R (13mm)	R (10mm)	R (10mm)	31	1	0
296	C31S4B1	Klebsiella pneumoniae	IR	R	12mm R	R	R	R	R	R	R	10mm R	12mm R	10mm R	R	12mm R	R	R	R	R	R	14mm R	R	R	S (21mm)	S (34mm)	R	S (29mm)	R	R (13mm)	R (10mm)	R (20mm)	R (15mm)	R (15mm)	29	3	0
297	C31S4B2	Providencia rettgeri	IR	R	R	14mm R	IR	R	R	R	R	8mm R	12mm R	12mm R	R	8mm R	R	R	IR	R	R	R	R	IR	S (27mm)	S (32mm)	S (23mm)	S (32mm)	S (32mm)	S (35mm)	S (24mm)	S (31mm)	S (29mm)	S (24mm)	32	0	0
298	C31S5B1	Klebsiella pneumoniae	IR	R	R	R	R	R	R	R	12mm R	R	R	R	R	R	R	R	12mm R	12mm S	R	R	R	R	R (20mm) (I)	S (29mm)	R (17mm)	S (27mm)	S (30mm)	S (32mm)	S (21mm)	S (27mm)	S (26mm)	R (15mm)	24	8	0
299	C31S5B2	Klebsiella pneumoniae	IR	R	R	R	R	R	R	R	R	R	20mm R	R	R	12mm R	R	R	14mm I	R	R	10mm R	R	R	S (24mm)	S (33mm)	S (21mm)	S (26mm)	S (27mm)	S (26mm)	S (24mm)	S (28mm)	S (31mm)	S (24mm)	21	11	0
300	C31S6B1	Escherichia coli	R	R	18mm S	R	R	R	R	R	14mm R	12mm R	R	R	R	10mm R	R	R	R	R	16mm S	R	R	R	R	R (18mm)	R	R (10mm)	R	R	R	R	R	R	30	2	0
301	C31S6B2	Pseudomonas spp.	R	R	R	R	R	R	R	R	R	R	20mm R	R	R	10mm R	R	R	16mm I	14mm S	R	R	R	R	S (23mm)	S (32mm)	R (14mm)	S (25mm)	R	R (17mm)	R (15mm)	R (23mm) (I)	R (21mm) (I)	S (19mm)	27	5	0
302	C31S7B1	Escherichia coli	R	R	16mm I	R	R	R	R	R	16mmR	10mm R	14mm R	12mm R	R	10mm R	R	R	12mm R	16mm S	R	16mm I	R	R	S (21mm)	S (28mm)	R (16mm)	R (21mm) (I)	S (27mm)	S (30mm)	R (20mm) (I)	R (25mm)	S (26mm)	R (15mm)	26	6	0
303	C32S2B1	Providencia spp.	R	R	18mm S	18mm R	14mm R	R	R	R	R	8mm R	15mm R	10mmR	R	R	R	R	R	15mm S	10mm R	R	R	R	S (23mm)	S (34mm)	R (17mm)	S (29mm)	S (28mm)	S (36mm)	R (19mm) (I)	S (28mm)	S (27mm)	R (18mm) (I)	23	9	0
304	C32S3B1	Providencia spp.	R	R	R	R	R	R	R	R	R	8mm R	10mm R	12mm R	R	10mm R	R	R	R	10mm S	R	R	R	R	S (22mm)	S (31mm)	R (19mm) (I)	S (27mm)	S (27mm)	S (32mm)	R (19mm) (I)	R (25mm) (I)	S (25mm)	S (20mm)	24	8	0
305	C32S3B2	Providencia rettgeri	IR	R	R	R	IR	R	R	R	R	R	16mm R	R	R	R	R	R	IR	R	R	R	R	IR	S (27mm)	S (33mm)	R (12mm)	S (28mm)	R	R (17mm)	R (11mm)	R (21	R (19mm)	R (10mm)	29	3	0
306	C32S4B1	Providencia spp.	R	R	15mm I	16mm R	R	R	R	R	R	R	14mm R	8mm R	R	R	R	R	R	12mm S	R	R	R	R	S (27mm)	S (31mm)	S (23mm)	S (30mm)	S (30mm)	S (35mm)	S (22mm)	S (31mm)	S (32mm)	S (25mm)	21	11	0
307	C32S4B2	Klebsiella pneumoniae	IR	R	R	R	R	R	R	R	R	10mm R	15mm R	14mm R	R	R	R	R	R	R	R	R	R	R	R (18mm) (I)	S (27mm)	R (11mm)	S (26mm)	R	R (22mm) (I)	R	R (18mm)	R (15mm)	S (21mm)	29	3	0
308	C32S5B1	Morganella morganii	IR	R	R	R	IR	R	R	R	10mm R	R	12mm R	10mm R	R	12mm R	R	R	IR	R	R	R	R	R	R	S(30mm)	R	S (26mm)	R (16mm)	R (22mm)	R(15mm)	R (17mm)	R (16mm)	R	30	2	0
309	C32S5B2	Morganella morganii	IR	R	R	R	IR	R	R	R	10mm R	R	14mm R	12mm R	R	13mm R	R	R	IR	R	R	R	R	R	R (14mm)	S (32mm)	R	S (27mm)	R (17mm)	S (27mm)	R (16mm)	R (18mm)	R (16mm)	R (13mm)	29	3	0
310	C32S6B1	Morganella morganii	IR	R	20mm S	20mm I	IR	R	14mm S	R	10mm R	12mm R	12mm R	16mm I	R	10mm R	14mm I	R	IR	R	R	R	R	R	S (27mm)	S (29mm)	R (16mm)	S (23mm)	R	R (18mm)	R (14mm)	R (22mm)	R (21mm) (I)	R (13mm)	27	5	0
311	C32S6B2	Escherichia coli	R	R	R	R	10mm R	R	R	R	14mmR	R	18mm R	R	R	R	R	R	14mm I	R	R	R	R	R	R (12mm)	S (33mm)	R	S (28mm)	R	R (14mm)	R (10mm)	R (15mm)	R (13mm)	R (15mm)	30	2	0
312	C33S1B1	Proteus mirabilis	R	R	R	14mm R	IR	12mm R	R	R	R	R	R	R	R	R	R	R	IR	R	R	R	R	IR	S (29mm)	S (26mm)	R (16mm)	R (20mm) (I)	S (39mm)	S (25mm)	R (16mm)	S (30mm)	R (19mm)	S (29mm)	26	6	0
313	C33S2B1	Escherichia coli	R	R	10mm R	R	10mm R	R	R	R	R	R	R	R	R	8mm R	R	R	14mm I	R	R	10mm R	R	R	R	R (17mm)	R	R	R (11mm)	R (13mm)	R	R	R	R	32	0	0
314	C33S2B2	Klebsiella pneumoniae	IR	R	R	R	R	R	R	R	R	12mm R	10mm R	14mm R	R	12mm R	R	R	10mm R	10mm S	R	R	R	R	R (20mm) (I)	S (32mm)	R (17mm)	S (24mm)	S (27mm)	S (33mm)	R (18mm) (I)	S (30mm)	S (28mm)	S (19mm)	24	8	0
315	C33S3B1	Escherichia coli	R	R	R	R	10mm R	R	R	R	10mmR	10mm R	21mm S	13mm R	R	10mm R	R	R	12mm R	R	R	10mm R	R	R	S (27mm)	S (37mm)	R (20mm) (I)	S (32mm)	R (18mm) (I)	S (32mm)	R (18mm) (I)	R (28mm)	S (25mm)	S (21mm)	25	7	0
316	C33S4B1	Providencia rettgeri	IR	R	12mm R	13mm R	IR	R	R	R	R	R	16mm R	R	R	R	R	R	IR	11mm S	R	R	R	IR	S (26mm)	S (29mm)	R (19mm) (I)	S (26mm)	R	R (21mm) (I)	R (17mm)	S (26mm)	S (24mm)	R (14mm)	26	6	0
317	C33S5B1	Morganella morganii	IR	R	R	R	IR	R	R	R	8mm R	R	14mm R	R	R	R	R	R	IR	14mm S	R	R	R	R	S (29mm)	S (34mm)	R (14mm)	S (28mm)	R	R (12mm)	R (13mm)	R (23mm) (I)	R (21mm) (I)	S (19mm)	26	6	0
318	C33S5B2	Klebsiella pneumoniae	IR	R	R	R	R	R	R	R	R	R	R	R	R	12mm R	R	R	12mm R	R	R	R	R	R	R (17mm) (I)	S (27mm)	R (10mm)	S (27mm)	R (19mm) (I)	S (25mm)	S (23mm)	R (20mm)	R (18mm)	S (23mm)	27	5	0
319	C33S6B1	Acinetobactor baumanii	IR	R	IR	R	15mm I	R	16mm S	R	R	R	R	R	R	15mm I	R	R	22mm S	10mm S	R	18mm S	IR	R	R	R (14mm)	R	R	R (18mm) (I)	R (12mm)	R	R	R	R	28	4	0
320	C33S6B2	Escherichia coli	R	R	8mm R	R	8mm R	R	R	R	8mmR	R	R	R	R	R	R	R	12mm R	R	R	R	R	R	R	R (18mm)	R	R	R	R (13mm)	R	R	R	R	32	0	0
321	C33S7B1	Alcaligenes spp.	R	R	18mm S	R	R	R	R	R	10mm R	R	12mm R	R	R	R	R	R	12mm R	10mm S	R	R	R	R	R (20mm) (I)	S (25mm)	R	S (23mm)	S (23mm)	R (19mm) (I)	S (27mm)	S (32mm)	S (31mm)	S (20mm)	23	9	0
322	C34S1B1	Aeromonas veronii	R	R	28mm S	R	11mm R	16mm R	18mm S	R	18mm R	13mm R	R	17mm S	R	16mm S	R	R	13mm R	16mm S	R	R	R	14mm S	R(17mm)	S (28mm)	R	R	R	R (20mm) (I)	R	R (12mm)	R	R	25	7	0
323	C34S2B1	Escherichia coli	R	R	12mm R	R	13mm I	R	R	R	R	R	9mm R	R	R	13mm R	R	R	14mm I	R	R	12mm R	R	R	R	R (15mm)	R	R	R	R	R	R	R	R (11mm)	32	0	0
324	C34S3B1	Aeromonas veronii	R	R	28mm S	R	13mm I	23mm I	20mm S	R	19mm R	15mm S	12mm R	13mm R	R	15mm I	19mm S	R	15mm I	16mm S	R	R	R	18mm S	S (23mm)	S (30mm)	R (12mm)	S (22mm)	S (25mm)	R (23mm) (I)	R (13mm)	R (20mm)	R (18mm)	S (22mm)	21	11	0
325	C34S3B2	Escherichia coli	R	R	R	R	12mm I	15mm R	12mm I	R	11mm R	16mm S	24mm S	15mm I	R	13mm R	19mm S	R	14mm I	R	R	13mm R	R	11mm R	S (27mm)	S (36mm)	R (11mm)	S (31mm)	R	R (21mm) (I)	R (16mm)	R (24mm) (I)	S (23mm)	R (16mm) (I)	25	7	0
326	C34S4B1_1	Citrobacter werkmanii	R	R	20mm S	R	11mm R	16mm R	10mm R	R	16mm R	14mm S	15mm R	15mm I	R	12mm R	15mm I	R	15mm I	15mm S	R	R	18mm S	9mm R	S (28mm)	S (34mm)	R (12mm)	S (25mm)	R	R (15mm)	R	R (20mm)	R (18mm)	R (13mm)	25	7	0
327	C34S4B1_2	Providencia rettgeri	IR	R	R	R	IR	11mm R	R	R	R	R	12mm R	R	R	14mm I	14mm I	R	IR	R	R	R	R	IR	R (17mm) (I)	R (20mm) (I)	R (14mm)	R (19mm) (I)	S (35mm)	S (25mm)	R	R (20mm)	R (22mm) (I)	S (22mm)	27	5	0
328	C34S5B1	Klebsiella pneumoniae	IR	R	R	R	12mm I	R	R	R	16mm R	R	13mm R	R	R	17mm S	R	R	17mm I	16mm S	R	13mm R	R	R	R (15mm)	R (20mm) (I)	R	R (15mm)	R	R (16mm)	R	R (17mm)	R (14mm)	R	30	2	0
329	C34S6B2	Klebsiella pneumoniae	IR	R	R	R	12mm I	R	14mm S	R	R	R	R	R	R	16mm S	R	R	15mm I	R	R	12mm R	R	13mm I	R	S (27mm)	R (10mm)	R (15mm)	R (18mm) (I)	R (12mm)	R (15mm)	R (12mm)	R	S (19mm)	28	4	0
330	C34S7B1	Bordettela trematum	R	R	R	12mm R	15mm I	R	12mm I	R	R	R	22mm S	R	R	R	R	R	16mm I	14mm S	R	R	R	8mm R	S (26mm)	S (32mm)	R (10mm)	S (27mm)	R	R (19mm) (I)	R	R (18mm)	R (16mm)	R (13mm)	27	5	0
331	C34S7B2	Escherichia coli	R	R	24mm S	R	12mm I	R	13mm S	R	16mmR	16mm S	R	18mm S	R	15mm I	R	R	16mm I	18mm S	13mm R	15mm I	R	11mm R	R (19mm) (I)	R (20mm) (I)	R	R (15mm)	R	R (19mm) (I)	R	R (16mm)	R (15mm)	R (14mm)	27	5	0
332	C35S1B1	Escherichia coli	R	R	13mm R	R	10mm R	R	R	R	17mmR	12mm R	18mm R	12mm R	10mm R	R	R	R	12mm R	16mm S	R	R	R	R	S (22mm)	S (29mm)	R (14mm)	R (21mm) (I)	S (28mm)	S (33mm)	R (20mm) (I)	R (24mm) (I)	S (28mm)	R (17mm) (I)	26	6	0
333	C35S2B1	Escherichia coli	R	R	R	R	8mm R	R	R	R	16mmR	R	12mm R	R	R	R	R	R	10mm R	14mm S	R	R	R	R	S (23mm)	S (31mm)	R (16mm)	S (24mm)	S (27mm)	S (35mm)	S (21mm)	S (27mm)	S (26mm)	S (33mm)	22	10	0
334	C35S2B2	Escherichia coli	R	R	20mm S	R	8mm R	14mm R	8mm R	R	18mmR	12mm R	21mm S	12mm R	10mm R	R	17mm S	R	R	16mm S	R	18mm S	R	R	R (18mm) (I)	S (36mm)	R (10mm)	S (31mm)	S (25mm)	S(28mm)	S (22mm)	R (21mm)	R (18mm)	S (24mm)	21	11	0
335	C35S3B1	Escherichia coli	R	R	12mm R	R	R	R	R	R	16mmR	12mm R	14mm R	12mm R	10mm R	R	R	R	10mm R	16mm S	R	18mm S	R	R	R (20mm) (I)	S (26mm)	R (13mm)	R (19mm) (I)	S (24mm)	S (29mm)	R (18mm) (I)	R (25mm) (I)	S (24mm)	R (13mm)	26	6	0
336	C35S3B2	Escherichia coli	R	R	10mm R	R	R	R	R	R	12mmR	12mm R	15mm R	R	12mm R	R	R	R	10mm R	14mm S	R	14mm R	R	R	R	S (32mm)	R	S (23mm)	R (14mm)	R (23mm) (I)	R	R	R	R	29	3	0
337	C35S4B1	Citrobacter Spp.	R	R	R	R	R	R	8mm R	R	16mm R	10mm R	16mm R	12mm R	10mm R	R	R	R	R	12mm S	R	15mm I	R	R	S (21mm)	S (40mm)	R	S (33mm)	S (23mm)	S (37mm)	R (17mm)	R (21mm)	R (18mm)	R	26	6	0
338	C35S4B2	Escherichia coli	R	R	R	12mm R	11mmR	R	11mm R	R	17mmR	13mm R	17mm R	12mm R	R	14mm I	R	R	14mm R	16mm S	R	R	15mm S	11mm R	S (27mm)	S (36mm)	R (13mm)	S (30mm)	R	R (19mm) (I)	R (13mm)	R (24mm) (I)	R (18mm)	S (19mm)	26	6	0
339	C35S5B1	Klebsiella pneumoniae	IR	R	R	R	12mm I	R	R	R	R	12mm R	15mm R	R	R	R	R	R	15mm I	12mm S	R	17mm I	R	R	R (13mm)	R (22mm) (I)	R	R (14mm)	R	R (18mm)	R	R (17mm)	R (12mm)	R	31	1	0
340	C35S5B2	Klebsiella pneumoniae	IR	R	R	R	11mm R	R	12mm I	R	10mm R	12mm R	16mm R	R	R	11mm R	R	R	14mm I	15mm S	R	22mm S	R	R	R (13mm)	R (18mm)	R	R (11mm)	R	R (19mm) (I)	R	R (12mm)	R	R	30	2	0
341	C35S6B1	Providencia rettgeri	IR	R	R	16mm R	IR	R	R	R	R	13mm R	14mm R	17mm S	R	14mm I	R	R	IR	11mm S	R	R	R	IR	S (21mm)	S (30mm)	R (12mm)	S (26mm)	S (28mm)	S (31mm)	R (17mm)	R (23mm) (I)	S (27mm)	R (17mm) (I)	24	8	0
342	C35S6B2	Escherichia coli	R	R	17mm S	R	R	R	R	R	14mm R	12mm R	12mm R	14mm R	10mm R	R	R	R	13mm R	14mm S	R	10mm R	R	R	R	S (27mm)	R	R (19mm) (I)	R (19mm) (I)	R (22mm) (I)	R	R (10mm)	R	R	29	3	0
343	C35S7B1	Escherichia coli	R	R	R	R	11mmR	R	R	R	R	R	14mm R	R	R	13mm R	R	R	13mm R	15mm S	R	R	R	R	S (22mm)	S (30mm)	R (18mm) (I)	S (23mm)	S (27mm)	S (33mm)	S (23mm)	S (26mm)	S (27mm)	R (16mm) (I)	23	9	0
344	C35S7B2	Escherichia coli	R	R	14mm I	R	10mmR	R	R	R	17mmR	R	13mm R	12mm R	10mm R	R	R	R	12mm R	14mm S	R	16mm I	R	R	R	S (31mm)	R	S (28mm)	R	R (16mm)	R (11mm)	R	R	R	29	3	0
345	C36S1B1	Escherichia coli	R	R	14mm I	R	10mmR	R	R	R	18mmR	10mm R	18mm R	10mmR	R	12mm R	R	R	12mm R	R	R	18mm S	R	R	R (11mm)	S (32mm)	R	S (27mm)	R (17mm)	R (17mm)	R (17mm)	R (11mm)	R (10mm)	R (11mm)	29	3	0
346	C36S2B1	Escherichia coli	R	R	R	R	R	R	R	R	10mmR	R	20mm R	12mm R	R	12mm R	R	R	12mm R	16mm S	R	14mm R	18mm S	10mm R	R (14mm)	S (31mm)	R	S (25mm)	R (20mm) (I)	R (18mm)	R (18mm) (I)	R (13mm)	R (11mm)	R (15mm)	28	4	0
347	C36S3B1	Citrobacter werkmanii	R	R	R	R	10mm R	R	12mm I	R	18mm R	10mm R	16mm R	14mm R	R	12mm R	R	R	12mm R	14mm S	R	12mm R	R	R	S (27mm)	S (36mm)	R (12mm)	S (22mm)	R	R (18mm)	R (11mm)	R (20mm)	R (19mm)	S (19mm)	27	5	0
348	C36S3B2	Citrobacter Spp.	R	R	R	R	10mm R	R	R	R	16mm R	R	17mm R	R	R	10mm R	R	R	12mm R	R	R	10mm R	R	R	R (18mm) (I)	S (34mm)	R	S (29mm)	R (12mm)	S (28mm)	R	R (16mm)	R (18mm)	R	29	3	0
349	C36S4B1	Enterobacter cloacae	IR	R	R	R	10mm R	R	R	R	15mm R	13mm R	R	14mm R	R	R	R	R	12mm R	14mm S	R	18mm S	R	R	R (10mm)	R (18mm)	R	R (11mm)	R (14mm)	R (19mm) (I)	R	R (12mm)	R (10mm)	R	30	2	0
350	C36S4B2	Enterobacter cloacae	IR	R	R	R	R	R	R	R	R	R	R	R	R	12mm R	R	R	10mm R	R	R	18mm S	R	R	R (11mm)	R (19mm)	R	R (13mm)	S (28mm)	R (19mm) (I)	R	R (18mm)	R (14mm)	R	30	2	0
351	C36S5B2	Escherichia coli	R	R	R	R	10mmR	R	R	R	13mmR	11mm R	21mm S	14mm R	R	12mm R	R	R	12mm R	R	R	14mm R	R	R	R	R (15mm)	R	S (23mm)	R	R (11mm)	R	R	R	R	30	2	0
352	C36S6B1	Citrobacter Spp.	R	R	R	R	10mm R	R	R	R	16mm R	R	16mm R	R	R	12mm R	R	R	14mm I	R	R	15mm I	16mm S	R	R (15mm)	S (33mm)	R	S (25mm)	R (10mm)	S (26mm)	R	R (19mm)	R (17mm)	R	28	4	0
353	C36S6B2	Escherichia coli	R	R	12mm R	R	10mmR	R	R	R	R	R	14mm R	R	R	R	R	R	12mm R	R	R	12mm R	R	R	S (25mm)	S (33mm)	S (27mm)	S (34mm)	S (34mm)	R (23mm) (I)	S (30mm)	S (33mm)	S (38mm)	S (32mm)	23	9	0
354	C36S7B1	Citrobacter werkmanii	R	R	18mm S	R	10mm R	R	R	R	14mm R	10mm R	10mm R	14mm R	R	12mm R	R	R	12mm R	14mm S	R	R	R	R	S (25mm)	S (36mm)	S (22mm)	S (27mm)	S (34mm)	S (27mm)	S (27mm)	S (29mm)	S (30mm)	S (26mm)	20	12	0
355	C36S7B2	Escherichia coli	R	10mm R	18mm S	R	10mm R	22mm R	10mm R	R	18mmR	10mm R	16mm R	12mm R	R	10mm R	20mm S	R	12mm R	12mm S	R	16mm I	R	R	R	S (23mm)	R	R (15mm)	R (18mm) (I)	R (20mm) (I)	R	R (10mm)	R	R	28	4	0
356	C37S1B1	Escherichia coli	R	11mm R	23mm S	R	11mm R	R	9mm R	15mm	18mmR	12mm R	24mm S	R	R	R	R	R	13mm R	22mm S	R	19mm S	R	9mm R	S (22mm)	S (34mm)	R	S (28mm)	R (19mm) (I)	S (32mm)	R (14mm)	R (20mm)	R (17mm)	R	23	8	1
357	C37S1B2	Escherichia coli	R	14mm S	20mm S	R	11mm R	11mm R	13mm S	R	17mmR	14mm S	25mm S	13mm R	R	13mm R	11mm R	R	14mm R	12mm S	R	17mm I	16mm S	12mm R	R (20mm) (I)	S (33mm)	S (24mm)	S (28mm)	S (30mm)	S (31mm)	S (25mm)	S (31mm)	S (28mm)	S (26mm)	16	16	0
358	C37S2B1	Escherichia coli	R	R	10mm R	R	R	R	11mm R	R	14mmR	14mm S	24mm S	12mm R	R	15mm I	R	R	14mm R	20mm S	R	20mm S	15mm S	R	S (25mm)	S (31mm)	S (27mm)	S (31mm)	S (31mm)	S (33mm)	S (23mm)	S (31mm)	S (32mm)	S (27mm)	17	15	0
359	C37S2B2	Escherichia coli	R	R	19mm S	R	10mmR	R	R	R	12mmR	12mm R	10mm R	13mm R	R	13mm R	R	R	13mm R	16mm S	R	11mm R	R	R	R	S (26mm)	R	R (14mm)	R (15mm)	R (21mm) (I)	R	R	R	R	29	3	0
360	C37S3B1	Klebsiella pneumoniae	IR	R	R	R	11mm R	R	R	R	R	R	20mm R	R	R	11mm R	R	R	13mm R	R	R	15mm I	R	R	R (20mm) (I)	S (28mm)	R (13mm)	S (27mm)	R (13mm)	S (26mm)	R (12mm)	R (21mm)	R (16mm)	S (20mm)	28	4	0
361	C37S3B2	Escherichia coli	R	R	20mm S	R	10mmR	R	R	R	12mmR	12mm R	25mm S	13mm R	R	12mm R	R	R	13mm R	16mm S	R	12mm R	R	R	R (14mm)	S (32mm)	R	S (26mm)	S (21mm)	R (20mm) (I)	R (19mm) (I)	R (14mm)	R (12mm)	R (13mm)	26	6	0
362	C37S4B1	Klebsiella pneumoniae	IR	R	R	R	11mm R	R	R	R	13mm R	11mm R	23mm S	R	R	14mm I	R	R	14mm I	12mm S	R	10mm R	R	R	R(20mm)	S(32mm)	R (11mm)	S(31mm)	R	S (27mm)	R	R(22mm)	R (17mm)	S (20mm)	26	6	0
363	C37S4B2	Escherichia coli	R	15mm S	25mm S	R	11mmR	R	13mm S	9mm	20mmR	R	27mm S	13mm R	R	14mm I	R	R	15mm I	20mm S	R	21mm S	R	13mm I	S (28mm)	S (37mm)	S (26mm)	S (30mm)	S (31mm)	S (34mm)	S (27mm)	S (33mm)	S (23mm)	S (27mm)	15	16	1
364	C37S5B1	Lysinibacillus fusiformis	R	R	R	R	10mm	R	R	R	14mm R	12mm R	16mm R	R	R	13mm R	R	R	11mm	12mm R	R	10mm R	R	R	R (20mm) (I)	S (32mm)	R (12mm)	S (22mm)	R (10mm)	S (27mm)	R (11mm)	R (21mm)	R (19mm)	R (11mm)	27	3	2
365	C37S5B2	Klebsiella pneumoniae	IR	R	R	R	10mm R	R	R	R	R	16mm S	15mm R	R	R	15mm I	R	R	14mm I	R	R	15mm I	R	R	R (17mm) (I)	S (29mm)	R (11mm)	S (22mm)	R	R (23mm) (I)	R	R (18mm)	R (15mm)	R (15mm)	29	3	0
366	C37S6B1	Lysinibacillus fusiformis	R	R	20mm S	R	R	22mm R	R	R	15mm R	13mm R	15mm R	17mm S	R	14mm I	15mm I	R	R	17mm I	R	15mm I	9mm R	R	R	S (25mm)	R	R	R	R (16mm)	R (15mm)	R (10mm)	R	R	29	3	0
367	C37S6B2	Escherichia coli	R	R	24mm S	R	12mm I	R	R	R	25mm S	R	R	R	R	20mm S	R	R	17mm I	18mm S	R	R	R	R	R (19mm) (I)	S (26mm)	R	R (17mm)	S (26mm)	S (30mm)	R (18mm) (I)	R (25mm) (I)	S (24mm)	R (13mm)	24	8	0
368	C38S1B1	Morganella morganii	IR	R	27mm S	R	IR	R	R	R	16mm R	R	R	17mm S	R	17mm S	17mm S	R	IR	R	R	12mm R	R	R	S (25mm)	S (30mm)	S (23mm)	S (25mm)	S (34mm)	S (30mm)	S (25mm)	S (29mm)	S (29mm)	R	19	13	0
369	C38S1B2	Lysinibacillus fusiformis	R	R	R	R	R	R	R	R	17mm R	14mm S	23mm S	12mm R	R	14mm I	R	R	R	20mm S	R	20mm S	16mm S	R	R (20mm) (I)	S (33mm)	R	S (27mm)	R (20mm) (I)	S (27mm)	R (12mm)	R (19mm)	R (17mm)	R	24	8	0
370	C38S2B1	Lysinibacillus fusiformis	R	R	19mm S	R	R	R	R	R	20mm I	14mm S	20mm R	14mm R	R	15mm I	R	R	14mm	22mm S	R	21mm S	R	R	S (22mm)	S (27mm)	R (17mm)	R (21mm) (I)	S (26mm)	S (29mm)	R (20mm) (I)	S (26mm)	S (27mm)	R	21	10	1
371	C38S2B2	Escherichia coli	R	R	24mm S	R	R	R	13mm S	R	14mm R	12mm R	27mm S	13mm R	R	13mm R	R	R	15mm I	20mm S	R	21mm S	R	12mm R	S (22mm)	S (32mm)	R (15mm)	S (23mm)	R	R (18mm)	R (13mm)	R (24mm) (I)	R (20mm) (I)	R (10mm)	24	8	0
372	C38S3B1	Providencia rettgeri	IR	R	R	15mm R	IR	R	R	R	R	15mm S	18mm R	R	R	12mm R	R	R	IR	R	R	R	R	IR	S (25mm)	S (34mm)	S (21mm)	S (27mm)	S (32mm)	S (30mm)	S (21mm)	S (28mm)	S (30mm)	S (23mm)	21	11	0
373	C38S3B2	Lysinibacillus fusiformis	R	R	R	R	12mm	R	12mm I	R	17mm R	R	20mm R	12mm R	R	15mm I	R	R	13mm	R	R	R	R	R	R (16mm) (I)	S (30mm)	R	S (27mm)	R (19mm) (I)	S (30mm)	R (10mm)	R (16mm)	R (13mm)	R	27	3	2
374	C38S4B1	Morganella morganii	IR	R	R	16mm R	IR	R	R	R	R	R	R	R	R	R	R	R	IR	16mm S	R	R	16mm S	29mm S	S (25mm)	S (31mm)	R (20mm) (I)	S (27mm)	S (27mm)	S (33mm)	S (25mm)	S (31mm)	S (26mm)	S (25mm)	20	12	0
375	C38S4B2	Escherichia coli	R	R	24mm S	R	R	R	11mm R	R	14mm R	14mm S	22mm S	12mm R	R	14mm I	R	R	15mm I	24mm S	R	20mm S	R	R	R (18mm) (I)	S (34mm)	R	S (23mm)	S (22mm)	R (19mm) (I)	R (11mm)	R (19mm)	R (18mm)	R	24	8	0
376	C38S5B1	Lysinibacillus fusiformis	R	16mm S	26mm S	R	R	15mm R	12mm I	R	18mm R	14mm S	28mm S	15mm I	R	15mm I	16mm I	R	R	23mm S	R	21mm S	R	R	R (17mm) (I)	S (29mm)	R	R (20mm) (I)	R	R (19mm) (I)	R (12mm)	R (16mm)	R (14mm)	R (17mm) (I)	25	7	0
377	C38S5B2	Lysinibacillus fusiformis	R	12mm I	26mm S	R	R	R	11mm R	R	15mm R	R	21mm S	12mm R	R	R	15mm I	R	18mm	22mm S	R	19mm S	R	R	R (17mm) (I)	S (32mm)	R	S (24mm)	R	R (17mm)	R (14mm)	R (18mm)	R (14mm)	R	25	6	1
378	C38S7B1	Morganella morganii	IR	R	26mm S	R	IR	R	18mm S	R	12mm R	R	15mm R	12mm R	R	R	R	R	IR	17mm S	R	16mm I	R	R	S (24mm)	S (28mm)	R (11mm)	R (20mm) (I)	R	R (18mm)	R	R (16mm)	R (17mm)	R (14mm)	27	5	0
379	C38S7B2	Lysinibacillus fusiformis	R	R	R	R	R	26mm S	19mm S	22mm I	R	17mm S	R	21mm S	R	20mm S	18mm S	R	15mm	R	R	15mm I	15mm S	14mm S	R	S (30mm)	R	S (23mm)	R (17mm)	R (23mm) (I)	R	R	R	R	21	10	1
380	C39S1B1	Escherichia coli	R	13mm S	26mm S	R	12mm I	10mm R	8mm R	R	14mmR	R	27mm S	R	R	16mm S	R	R	17mm I	R	R	20mm S	19mm S	10mm R	R (18mm) (I)	S (34mm)	R	S (28mm)	R	R (16mm)	R (12mm)	R (16mm)	R (13mm)	R (10mm)	24	8	0
381	C39S1B2	Escherichia coli	R	20mm S	15mm I	R	R	R	R	9mm	15mmR	R	R	R	R	R	R	R	16mm I	25mm S	R	R	R	R	R (12mm)	S (32mm)	R	S (29mm)	R (18mm) (I)	R (21mm) (I)	R (20mm) (I)	R (13mm)	R (12mm)	R (17mm) (I)	27	4	1
382	C39S2B1	Klebsiella pneumoniae	IR	R	19mm S	R	10mm R	R	8mm R	R	17mm R	R	20mm R	R	R	8mm R	R	R	13mm R	14mm S	R	17mm I	12mm I	8mm R	R (12mm)	S (30mm)	R	S (25mm)	R (19mm) (I)	R (18mm)	R (18mm) (I)	R (13mm)	R (12mm)	R (13mm)	28	4	0
383	C39S2B2	Escherichia coli	R	R	29mm S	R	10mm R	R	13mm S	R	18mmR	14mm S	26mm S	15mm I	R	13mm R	R	R	13mm R	17mm S	R	20mm S	15mm S	12mm R	S (23mm)	S (31mm)	S (23mm)	S (30mm)	S (29mm)	S (30mm)	S (25mm)	S (31mm)	S (27mm)	S (23mm)	15	17	0
384	C39S3B1	Klebsiella pneumoniae	IR	R	17mm S	R	12mm I	R	10mm R	R	18mm R	R	22mm S	R	R	10mm R	R	R	16mm S	13mm S	R	17mm I	R	8mm R	R (15mm)	S (31mm)	R	S (25mm)	R	R (13mm)	R (11mm)	R (13mm)	R (11mm)	R	26	6	0
385	C39S3B2	Escherichia coli	R	13mm S	24mm S	R	10mmR	14mm R	R	R	15mmR	10mm R	22mm S	12mm R	R	13mm R	14mm I	R	14mm I	19mm S	R	17mm I	17mm S	R	S (25mm)	S (34mm)	S (25mm)	S (31mm)	S (32mm)	S (33mm)	S (27mm)	S (31mm)	S (30mm)	S (27mm)	17	15	0
386	C39S4B1	Enterobacter spp.	R	10mm R	R	R	12mm I	12mm R	10mm R	R	17mm R	R	R	14mm R	R	15mm I	15mm I	R	18mm I	R	R	16mm I	R	R	S (26mm)	S (28mm)	S (36mm)	R (19mm) (I)	R	S (25mm)	R (13mm)	S (30mm)	S (25mm)	S (20mm)	25	7	0
387	C39S4B2	Escherichia coli	R	13mm S	10mm R	R	R	10mm R	13mm S	R	R	12mm R	22mm S	12mm R	R	13mm R	8mm R	R	15mm I	R	R	R	R	R	S (28mm)	S (32mm)	S (24mm)	S (29mm)	S (27mm)	S (31mm)	S (25mm)	S (31mm)	S (31mm)	S (25mm)	19	13	0
388	C39S5B1	Escherichia coli	R	R	10mm R	R	12mm I	R	14mm S	R	18mmR	13mm R	R	R	R	15mm I	R	R	13mm R	19mm S	R	14mm R	R	12mm R	R (14mm)	S (35mm)	R (10mm)	S (28mm)	S (22mm)	R (18mm)	S (22mm)	R (16mm)	R (14mm)	R (18mm) (I)	26	6	0
389	C39S5B2	Escherichia coli	R	14mm S	R	R	12mm I	R	R	R	15mmR	R	21mm S	14mm R	R	15mm I	R	R	14mm I	20mm S	R	18mm S	18mm S	14mm S	R (16mm) (I)	S (33mm)	R (10mm)	S (29mm)	S (22mm)	R (23mm) (I)	R (20mm) (I)	R (19mm)	R (13mm)	R (17mm) (I)	23	9	0
390	C39S5B3	Pseudomonas aeruginosa	IR	20mm S	IR	13mm R	12mm I	R	R	R	R	R	18mm R	R	R	R	R	R	17mm I	19mm S	R	R	IR	IR	S(27mm)	S(37mm)	R	S (23mm)	S(25mm)	S(33mm)	S (25mm)	R(23mm)	S(23mm)	R (17mm) (I)	23	9	0
391	C39S6B1	Klebsiella pneumoniae	IR	R	R	R	8mm R	R	8mm R	R	10mm R	R	R	R	R	16mm S	R	R	13mm R	12mm S	R	12mm R	R	R	R (10mm)	R (16mm)	R	R (10mm)	R (21mm)	R (15mm)	R	R (10mm)	R (10mm)	R	30	2	0
392	C39S6B2	Pseudomonas aeruginosa	IR	R	IR	R	14mm I	R	R	R	R	R	R	R	R	R	R	R	19mm S	R	R	R	IR	IR	S (32mm)	S (37mm)	S (24mm)	S (33mm)	R (13mm)	S (30mm)	R (20mm) (I)	S (32mm)	S (23mm)	R (18mm) (I)	24	8	0
393	C39S7B1	Escherichia coli	R	R	R	R	10mm R	R	R	R	14mmR	R	20mm R	R	R	12mm R	R	R	14mm I	20mm S	R	16mm I	R	R	R (14mm)	S (27mm)	R	S (23mm)	R (20mm) (I)	R (21mm) (I)	R	R (14mm)	R	R	29	3	0
394	C39S7B2	Escherichia coli	R	R	21mm S	R	R	18mm R	R	R	16mmR	10mm R	20mm R	12mm R	R	12mm R	18mm S	R	R	18mm S	R	14mm R	R	R	R (10mm)	S (28mm)	R	S(28mm)	R (13mm)	R(16mm)	R(15mm)	R(10mm)	R	R (13mm)	27	5	0
395	C40S1B1	Escherichia coli	R	R	R	R	R	R	R	R	16mmR	12mm R	18mm R	14mm R	R	12mm R	R	R	8mm R	17mm S	R	15mm I	R	R	R (12mm)	S (33mm)	R	S (26mm)	R (17mm)	R (18mm)	R (18mm) (I)	R (12mm)	R (10mm)	R (13mm)	29	3	0
396	C40S1B2	Escherichia coli	R	24mm S	21mm S	R	R	12mm R	10mm R	R	17mmR	R	23mm S	14mm R	R	12mm R	R	R	12mm R	18mm S	R	25mm S	R	R	S (22mm)	S (31mm)	S (26mm)	S (27mm)	S (30mm)	S (32mm)	S (27mm)	S (30mm)	S (31mm)	S (27mm)	17	15	0
397	C40S2B1	Morganella morganii	IR	R	20mm S	14mm R	IR	13mm R	R	R	R	15mm S	13mm R	16mm I	R	15mm I	R	R	IR	12mm S	R	23mm S	R	R	S (22mm)	S (29mm)	R (17mm)	S (26mm)	S (24mm)	S (29mm)	R (19mm) (I)	S (27mm)	S (26mm)	S (20mm)	20	12	0
398	C40S2B2	Escherichia coli	14mm S	12mm I	17mm S	R	10mm R	R	R	R	14mmR	12mm R	17mm R	13mm R	R	R	8mm R	R	13mm R	16mm S	R	14mm R	R	R	S (28mm)	S (33mm)	S (23mm)	S (22mm)	S (28mm)	S (28mm)	S (26mm)	S (30mm)	S (28mm)	S (24mm)	19	13	0
399	C40S3B1	Escherichia coli	R	R	21mm S	R	10mm R	R	R	R	16mmR	15mm S	12mm R	15mm I	R	15mm I	R	R	12mm R	18mm S	R	21mm S	R	R	S (21mm)	S (34mm)	S (23mm)	R (21mm) (I)	S (31mm)	S (30mm)	S (26mm)	S (29mm)	S (29mm)	S (23mm)	19	13	0
400	C40S3B2	Escherichia coli	R	8mm R	17mm S	R	8mm R	20mm R	10mm R	R	12mmR	12mm R	17mm R	13mm R	R	14mm I	19mm S	R	12mm R	16mm S	R	14mm R	R	R	S (23mm)	S (32mm)	S (24mm)	S (27mm)	S (31mm)	S (30mm)	S (22mm)	S (28mm)	S (31mm)	S (25mm)	19	13	0
401	C40S4B1	Morganella morganii	IR	R	20mm S	R	IR	21mm R	R	R	R	14mm S	R	16mm I	R	13mm R	17mm S	R	IR	17mm S	R	R	R	10mm R	S (25mm)	S (27mm)	S (23mm)	S (24mm)	S (28mm)	S (32mm)	S (23mm)	R (23mm) (I)	S (32mm)	S (20mm)	19	13	0
402	C40S4B2	Klebsiella quasipneumoniae	R	R	R	R	8mm R	R	R	R	11mm R	R	12mm R	R	R	12mm R	R	R	R	10mm S	R	17mm I	R	R	R (11mm)	S (30mm)	R	S (23mm)	R (14mm)	R (16mm)	R (15mm)	R (12mm)	R (11mm)	R (13mm)	29	3	0
403	C40S5B1	Klebsiella pneumoniae	IR	R	R	R	12mm I	R	R	R	R	R	10mm R	R	R	R	R	R	15mm I	17mm S	R	18mm S	R	R	R (13mm)	R (19mm)	R (10mm)	R (12mm)	R (10mm)	R (18mm)	R	R (12mm)	R (10mm)	R	30	2	0
404	C40S5B2	Morganella morganii	IR	R	R	21mm I	IR	18mm R	R	R	R	13mm R	R	15mm I	R	13mm R	18mm S	R	IR	16mm S	R	R	R	R	S (31mm)	S (28mm)	R (20mm) (I)	S (23mm)	S (31mm)	S (27mm)	R (16mm)	S (32mm)	S (28mm)	S (26mm)	22	10	0
405	C40S6B1	Klebsiella pneumoniae	IR	R	10mm R	R	10mm R	R	R	R	16mm R	13mm R	12mm R	14mm R	R	12mm R	R	R	14mm I	R	R	21mm S	R	R	R (17mm) (I)	S (27mm)	R	R (18mm)	S (23mm)	S (27mm)	S (25mm)	R (21mm)	R (22mm) (I)	R	27	5	0
406	C40S6B2	Escherichia coli	R	R	18mm S	R	10mmR	R	R	R	14mmR	R	19mm R	R	R	8mm R	R	R	12mm R	R	R	10mm R	R	R	R(20mm)	S(27mm)	S(23mm)	S (24mm)	S(25mm)	S(29mm)	R (19mm) (I)	S(29mm)	S(26mm)	S(28mm)	23	9	0
407	C40S7B1	Escherichia coli	R	R	17mm S	R	10mmR	16mm R	R	R	16mmR	12mm R	R	14mm R	R	12mm R	16mm I	R	13mm R	17mm S	R	15mm I	R	R	R (11mm)	S (34mm)	R	S (28mm)	R (18mm) (I)	R (18mm)	R (19mm) (I)	R (12mm)	R	R (15mm)	28	4	0
408	C41S1B1	Morganella morganii	IR	R	R	15mm R	IR	15mm R	R	R	R	R	9mm R	R	R	R	14mm I	R	IR	16mm S	R	R	R	10mm R	R (17mm) (I)	R (20mm) (I)	R	R (18mm)	R (13mm)	R (12mm)	S (21mm)	R (16mm)	R (17mm)	R (13mm)	30	2	0
409	C41S1B2	Morganella morganii	IR	12mm I	20mm S	21mm I	IR	14mm R	R	R	12mm R	14mm S	R	17mm S	R	14mm I	14mm I	R	IR	16mm S	R	R	R	11mm R	R (17mm) (I)	S (29mm)	R	S (26mm)	S (21mm)	S (28mm)	R (18mm) (I)	R (22mm)	S (26mm)	R (15mm)	23	9	0
410	C41S2B1	Pseudomonas aeruginosa	IR	16mm S	IR	R	11mm R	R	R	R	19mm R	15mm S	25mm S	R	R	10mm R	R	R	15mm I	15mm S	R	22mm S	IR	IR	R	R (12mm)	R	R	S (33mm)	R	R	R	R	R	26	6	0
411	C41S2B2	Klebsiella pneumoniae	IR	13mm S	R	19mm R	10mm R	R	R	R	R	10mm R	12mm R	R	R	R	R	R	14mm I	17mm S	R	13mm R	R	R	R (20mm) (I)	S (30mm)	S (28mm)	S (22mm)	S (33mm)	S (33mm)	S (26mm)	S (26mm)	S (27mm)	S (30mm)	20	12	0
412	C41S3B1	Escherichia coli	R	R	23mm S	R	11mm R	15mm R	R	R	9mmR	14mm S	20mm R	15mm I	R	12mm R	19mm S	R	14mm I	12mm S	R	21mm S	19mm S	R	S(24mm)	S(27mm)	S(23mm)	S (29mm)	S(28mm)	S (30mm)	S (21mm)	S(28mm)	S (28mm)	S (29mm)	16	16	0
413	C41S3B2	Klebsiella pneumoniae	IR	R	24mm S	R	13mm I	R	10mm R	R	15mm R	R	15mm R	R	R	10mm R	R	R	15mm I	10mm S	R	15mm I	R	R	R (11mm)	S (30mm)	R	S (25mm)	R (18mm) (I)	R (19mm) (I)	S (22mm)	R (13mm)	R (11mm)	R (14mm)	27	5	0
414	C41S4B1	Escherichia coli	R	15mm S	R	R	R	R	R	R	R	13mm R	20mm R	14mm R	R	15mm I	R	R	11mm R	19mm S	R	15mm I	20mm S	10mm R	R (13mm)	S (32mm)	R	S (29mm)	R (18mm) (I)	R (20mm) (I)	R (13mm)	R (14mm)	R (13mm)	R (15mm)	27	5	0
415	C41S4B2	Morganella morganii	IR	13mm S	10mm R	R	IR	17mm R	R	R	10mm R	R	14mm R	R	R	R	15mm I	R	IR	15mm S	R	R	R	R	S (24mm)	S (33mm)	S (25mm)	R (21mm) (I)	S (32mm)	S (33mm)	S (29mm)	S (30mm)	S (30mm)	S (28mm)	21	11	0
416	C41S5B1	Escherichia coli	R	14mm S	R	R	10mm R	R	R	R	R	R	R	R	R	R	R	R	12mm R	20mm S	R	R	R	R	R	S (32mm)	R	R	R	R	R	R	R	R	29	3	0
417	C41S5B2	Providencia stuartii	IR	8mm R	20mm S	R	IR	R	R	R	16mm R	R	18mm R	8mm R	R	15mm I	R	R	IR	17mm S	R	22mm S	R	IR	R(19mm)	S (29mm)	R(10mm)	R(19mm)	R	R (18mm)	S (23mm)	R (19mm)	R(19mm)	R(16mm) (I)	27	5	0
418	C41S6B1	Klebsiella pneumoniae	IR	15mm S	17mm S	R	10mm R	R	R	R	R	R	10mm R	R	R	12mm R	R	R	12mm R	R	R	19mm S	R	R	S (26mm)	S (32mm)	S (24mm)	S (26mm)	S (26mm)	S (29mm)	S (25mm)	S (29mm)	S (29mm)	S (24mm)	19	13	0
419	C41S7B1	Escherichia coli	R	10mm R	20mm S	R	R	10mm R	R	R	15mmR	12mm R	21mm S	R	R	16mm S	R	R	12mm R	14mm S	10mm R	20mm S	R	10mm R	S (22mm)	S (28mm)	S(22mm)	S(27mm)	S (26mm)	S(28mm)	S (25mm)	S(29mm)	S (28mm)	S(24mm)	17	15	0
420	C42S1B1	Enterobacter hormaechei	R	12mm I	18mm S	R	R	18mm R	R	R	15mm R	13mm R	17mm R	16mm I	R	14mm I	13mm R	R	12mm R	12mm S	R	16mm I	R	R	S (27mm)	S (33mm)	S (26mm)	S (33mm)	S (29mm)	S (30mm)	S (27mm)	S (29mm)	S (31mm)	S (26mm)	20	12	0
421	C42S1B2	Escherichia coli	R	22mm S	R	R	9mm R	R	8mm R	R	12mmR	11mm R	18mm R	R	R	R	R	R	10mm R	15mm S	R	16mm I	R	R	S (28mm)	S (33mm)	S (27mm)	S (31mm)	S (32mm)	S (34mm)	R (17mm)	S (33mm)	S (30mm)	S (28mm)	21	11	0
422	C42S2B1	Providencia spp.	R	R	R	14mm R	R	R	R	R	8mm R	R	10mm R	R	R	10mm R	R	R	R	14mm S	R	R	R	R	R (17mm) (I)	R (20mm) (I)	R (12mm)	R (19mm) (I)	S (33mm)	S (26mm)	R (16mm)	R (20mm)	R (21mm) (I)	S (21mm)	28	4	0
423	C42S2B2	Escherichia coli	R	22mm S	19mm S	R	R	R	R	R	13mmR	14mm S	21mm S	15mm I	R	13mm R	R	R	10mm R	18mm S	R	19mm S	R	R	S (27mm)	S (34mm)	S (22mm)	S (28mm)	S (30mm)	S (33mm)	R (13mm)	S (31mm)	S (30mm)	S (24mm)	17	15	0
424	C42S3B1	Enterobacter hormaechei	R	R	20mm S	R	R	13mm R	R	R	17mm R	14mm S	27mm S	16mm I	R	14mm I	R	R	14mm I	11mm S	R	20mm S	R	R	S (26mm)	S (30mm)	S (24mm)	S (29mm)	S (33mm)	S (34mm)	S (26mm)	S (31mm)	S (26mm)	S (30mm)	17	15	0
425	C42S3B2	Escherichia coli	R	R	R	R	R	R	R	R	22mm I	15mm S	24mm S	R	R	15mm I	R	R	13mm R	R	R	17mm I	R	R	S (27mm)	S (31mm)	R (21mm)	S (29mm)	S (28mm)	R (22mm) (I)	S (23mm)	S (28mm)	S (28mm)	R (16mm) (I)	23	9	0
426	C42S4B1	Proteus mirabilis	R	R	R	R	IR	R	R	R	R	R	22mm S	R	R	R	R	R	IR	12mm S	R	12mm R	R	IR	S (24mm)	S (27mm)	R (20mm) (I)	S (26mm)	S (28mm)	S (30mm)	R	S (28mm)	R (20mm) (I)	S (19mm)	23	9	0
427	C42S4B2	Escherichia coli	R	R	R	R	R	R	R	R	19mm R	15mm S	29mm S	R	R	15mm I	R	R	15mm I	19mm S	R	18mm S	15mm S	R	S (22mm)	S (30mm)	R	S (27mm)	R (19mm) (I)	S (31mm)	R (19mm) (I)	R (18mm)	R (15mm)	R (11mm)	23	9	0
428	C42S5B1	Proteus mirabilis	R	R	19mm S	21mm I	IR	15mm R	R	R	R	R	25mm S	R	R	12mm R	14mm I	R	IR	15mm S	R	R	R	IR	R (19mm) (I)	S (34mm)	R (14mm)	S (30mm)	S (24mm)	R (21mm) (I)	R (12mm)	R (22mm)	R (21mm) (I)	S (22mm)	25	7	0
429	C42S5B2	Proteus mirabilis	R	18mm S	21mm S	R	IR	16mm R	22mm S	23mm	17mm R	16mm S	31mm S	18mm S	21mm S	16mm S	19mm S	R	IR	16mm S	R	16mm I	R	IR	S (27mm)	S (34mm)	R (10mm)	S (27mm)	S (28mm)	S (32mm)	R (20mm) (I)	R (22mm)	R (18mm)	S (21mm)	15	16	1
430	C42S6B1	Bacillus	R	R	R	R	R	R	R	R	17mm R	10mm R	24mm S	14mm R	R	10mm R	R	R	R	19mm I	R	17mm I	R	R	R (18mm) (I)	S (26mm)	R	R (19mm) (I)	S (21mm)	S (28mm)	S (23mm)	R (20mm)	R (21mm) (I)	R	27	5	0
431	C42S6B2	Escherichia coli	R	R	R	21mm I	R	R	R	R	R	R	26mm S	R	R	R	R	R	17mm I	R	23mm S	R	R	R	R	S (31mm)	R	S (24mm)	R (16mm)	R (22mm) (I)	S (25mm)	R	R	R	27	5	0
432	C42S7B1	Escherichia coli	R	R	R	R	R	R	R	R	16mmR	10mm R	26mm S	R	R	10mm R	R	R	14mm I	15mm S	R	20mm S	R	R	R (12mm)	S (29mm)	R	S (24mm)	S (21mm)	S (26mm)	R	R (11mm)	R	R	25	7	0
433	C43S1B1	Klebsiella pneumoniae	IR	R	10mm R	R	10mm R	R	10mm R	R	13mm R	R	26mm S	R	R	9mm R	R	R	12mm R	13mm S	R	12mm R	R	R	S (29mm)	S (31mm)	S (30mm)	S (29mm)	S (33mm)	R (22mm) (I)	S (28mm)	S (35mm)	S (35mm)	S (33mm)	21	11	0
434	C43S1B2	Escherichia coli	R	R	R	9mm R	12mm I	R	14mm S	R	20mmR	15mm S	28mm S	16mm I	R	14mm I	R	R	15mm I	15mm S	R	14mm R	10mm R	16mm S	S (21mm)	S (32mm)	R	S (28mm)	S (22mm)	S (30mm)	S (23mm)	R (19mm)	R (18mm)	R (11mm)	21	11	0
435	C43S2B1	Escherichia coli	R	R	18mm S	R	10mmR	10mm R	R	9mm	16mmR	15mm S	27mm S	14mm R	R	14mm I	R	R	13mm R	12mm S	R	17mm I	10mm R	R	R (13mm)	S (33mm)	R	S (29mm)	R (18mm) (I)	R (18mm)	R (18mm) (I)	R (11mm)	R (11mm)	R (13mm)	25	6	1
436	C43S2B2	Klebsiella pneumoniae	IR	R	R	R	11mm R	R	10mm R	R	15mm R	15mm S	28mm S	R	R	10mm R	R	R	R	13mm S	R	12mm R	R	R	R (13mm)	S (29mm)	R	S (25mm)	R (14mm)	R (17mm)	R (11mm)	R (12mm)	R (10mm)	R (10mm)	27	5	0
437	C43S3B1	Klebsiella pneumoniae	IR	R	19mm S	R	11mm R	R	R	R	10mm R	15mm S	10mm R	R	R	R	R	R	13mm R	13mm S	R	R	R	R	S (27mm)	S (30mm)	S (29mm)	S (27mm)	S (33mm)	S (33mm)	S (30mm)	S (34mm)	S (32mm)	S (33mm)	19	13	0
438	C43S4B1	Providencia rettgeri	IR	R	R	20mm I	IR	12mm R	R	R	R	15mm S	23mm S	R	R	8mm R	13mm R	R	IR	R	R	17mm I	R	IR	R (20mm) (I)	S (29mm)	R (18mm) (I)	S (29mm)	S (23mm)	S (24mm)	R (19mm) (I)	R (21mm)	S (23mm)	S (26mm)	24	8	0
439	C43S5B1_2	Escherichia coli	R	R	19mm S	15mm R	R	16mm R	10mm R	R	12mmR	R	18mm R	R	R	8mm R	14mm I	R	13mm R	17mm S	R	18mm S	R	9mm R	S(27mm)	S(30mm)	R(15mm)	S(28mm)	S (27mm)	S (30mm)	R (19mm) (I)	R (24mm) (I)	S (28mm)	R (17mm) (I)	23	9	0
440	C43S5B1_1	Escherichia coli	R	R	19mm S	R	17mm S	R	R	R	19mmR	R	25mm S	14mm R	R	14mm I	R	R	13mm R	16mm S	11mm R	20mm S	R	R	S (30mm)	S (36mm)	S (31mm)	S (34mm)	S (37mm)	S (38mm)	S (38mm)	S (34mm)	S (35mm)	S (34mm)	17	15	0
441	C43S5B2	Klebsiella pneumoniae	IR	R	R	R	11mm R	R	R	R	15mm R	15mm S	22mm S	R	R	15mm I	R	R	14mm I	12mm S	R	R	R	R	R (18mm) (I)	S (32mm)	R (14mm)	S (25mm)	R (12mm)	S (27mm)	S (21mm)	R (19mm)	R (17mm)	R (17mm) (I)	25	7	0
442	C43S5B3	Pseudomonas aeruginosa	IR	R	IR	R	15mm I	R	R	R	R	R	R	R	R	R	R	R	17mm I	R	R	R	IR	IR	S (27mm)	S (30mm)	R (19mm) (I)	S (25mm)	S (33mm)	S (34mm)	S (25mm)	S (29mm)	S (26mm)	S (24mm)	23	9	0
443	C43S6B1	Citrobacter werkmanii	R	R	17mm S	R	15mm I	15mm R	R	R	22mm I	14mm S	10mm R	15mm I	R	13mm R	14mm I	R	18mm I	R	R	8mm R	16mm S	R	S (28mm)	S (31mm)	R (17mm)	S (24mm)	S (31mm)	S (30mm)	S (25mm)	S (30mm)	S (27mm)	S (20mm)	20	12	0
444	C44S1B1	Klebsiella pneumoniae	IR	R	19mm S	R	R	R	10mm R	R	15mm R	R	22mm S	R	R	10mm R	R	R	12mm R	13mm S	R	20mm S	12mm I	R	R (12mm)	S (31mm)	R	S (28mm)	R (17mm)	R (21mm)	R (17mm)	R (14mm)	R (10mm)	R (16mm) (I)	26	6	0
445	C44S1B2	Escherichia coli	R	R	16mm I	R	8mm R	R	R	R	R	13mm R	23mm S	14mm R	R	13mm R	R	R	11mm R	14mm S	R	15mm I	R	R	R (11mm)	S (34mm)	R	S (29mm)	R (18mm) (I)	R (18mm)	S (24mm)	R (18mm)	R (11mm)	R (16mm) (I)	27	5	0
446	C44S2B1	Escherichia coli	R	R	15mm I	R	8mm R	R	R	R	12mm R	13mm R	23mm S	R	R	14mm I	R	R	12mm R	14mm S	R	14mm R	R	R	R (13mm)	S (32mm)	R	S (28mm)	R (20mm) (I)	R (21mm)	R (16mm)	R (14mm)	R (12mm)	R (14mm)	28	4	0
447	C44S2B2	Escherichia coli	R	R	20mm S	R	12mm I	R	R	R	17mmR	R	21mm S	15mm I	R	14mm I	R	R	15mm I	19mm S	R	13mm R	R	R	R (10mm)	S (24mm)	R	S (21mm)	R (18mm) (I)	R (17mm)	R (13mm)	R (10mm)	R	R(14mm)	27	5	0
448	C44S3B1	Morganella morganii	IR	R	18mm S	R	IR	R	R	R	R	R	15mm R	14mm R	R	13mm R	R	R	IR	13mm S	R	R	R	R	R (18mm) (I)	S (29mm)	R	S (26mm)	S (26mm)	S (33mm)	R (17mm)	R (22mm)	S (25mm)	R (13mm)	25	7	0
449	C44S3B2	Escherichia coli	R	23mm S	21mm S	R	10mm R	16mm R	R	R	R	14mm S	R	13mm R	R	13mm R	15mm I	R	12mm R	17mm S	R	26mm S	18mm S	R	R (16mm) (I)	S (34mm)	R (11mm)	R (21mm) (I)	R	R (19mm) (I)	R (13mm)	R (12mm)	R (13mm)	S (22mm)	24	8	0
450	C44S4B1	Klebsiella pneumoniae	IR	R	20mm S	R	10mm R	8mm R	10mm R	R	17mm R	R	23mm S	13mm R	R	R	R	R	R	13mm S	R	R	R	8mm R	R (10mm)	S (24mm)	R	R (20mm) (I)	R	R	R	R	R (10mm)	R (11mm)	28	4	0
451	C44S4B2	Escherichia coli	R	11mm R	23mm S	R	R	R	R	R	18mmR	R	24mm S	R	R	14mm I	R	R	12mm R	18mm S	R	16mm I	R	R	R (12mm)	S (27mm)	R	R (20mm) (I)	R	R (18mm)	R	R	R	R	28	4	0
452	C44S5B1	Klebsiella pneumoniae	IR	R	R	R	9mm R	R	R	R	10mm R	R	22mm S	R	R	14mm I	R	R	13mm R	10mm S	R	21mm S	R	R	R (10mm)	S (28mm)	R	S (22mm)	R	R (16mm)	R (13mm)	R (12mm)	R	R (13mm)	27	5	0
453	C44S5B2	Escherichia coli	R	17mm S	22mm S	R	9mm R	20mm R	R	R	19mmR	13mm R	21mm S	12mm R	R	15mm I	R	R	14mm I	14mm S	R	18mm S	14mm I	R	S (23mm)	S (33mm)	S (26mm)	S (22mm)	R	S (26mm)	R (12mm)	S (30mm)	S (28mm)	S (26mm)	19	13	0
454	C44S6B1	Escherichia coli	R	9mm R	R	R	13mm I	R	10mm R	10mm	9mmR	16mm S	R	16mm I	R	15mm I	R	R	17mm I	11mm S	R	R	R	10mm R	R	S (30mm)	R	S (23mm)	R	R (10mm)	R	R	R	R	27	4	1
455	C44S6B2	Escherichia coli	R	R	18mm S	R	11mm R	R	R	R	20mmR	15mm S	27mm S	15mm I	R	14mm I	R	R	15mm I	13mm S	R	13mm R	R	R	R (14mm)	S (35mm)	R	S (23mm)	R	R (19mm) (I)	R (12mm)	R (16mm)	R	S (19mm)	25	7	0
456	C44S7B1	Citrobacter spp.	R	R	21mm S	R	10mm R	17mm R	10mm R	R	17mm R	14mm S	23mm S	R	R	13mm R	17mm S	R	13mm R	15mm S	R	R	R	R	S (22mm)	S (26mm)	R (18mm) (I)	R (18mm)	R	R (19mm) (I)	R (13mm)	R (23mm) (I)	R (22mm) (I)	S (22mm)	24	7	0
457	C44S7B2	Escherichia coli	R	10mm R	17mm S	R	11mm R	R	12mm I	R	18mmR	R	R	15mm I	R	R	R	R	15mm I	20mm S	R	25mm S	R	R	R (16mm) (I)	S (33mm)	R (11mm)	S (29mm)	S (22mm)	S (25mm)	S (23mm)	R (17mm)	R (14mm)	S (19mm)	23	9	0
458	C45S1B1	Klebsiella pneumoniae	IR	R	R	R	14mm I	R	11mm R	R	8mm R	R	28mm S	15mm I	R	R	R	R	16mm I	R	R	R	R	R	R (12mm)	S (29mm)	R	S (21mm)	R (16mm)	R (21mm) (I)	R (15mm)	R (15mm)	R (10mm)	R (11mm)	29	3	0
459	C45S1B2	Escherichia coli	R	15mm S	R	R	14mm I	17mm R	13mm S	R	R	R	32mm S	R	R	16mm S	18mm S	R	15mm I	16mm S	R	R	R	10mm R	S (23mm)	S (30mm)	S (24mm)	S (22mm)	R	S (25mm)	R (13mm)	S (27mm)	S (27mm)	S (25mm)	18	14	0
460	C45S2B1	Escherichia coli	R	14mm S	R	R	13mm I	R	10mm R	R	17mm R	R	33mm S	R	R	R	10mm R	R	R	20mm S	R	R	R	R	R (17mm) (I)	S (30mm)	S (21mm)	R (19mm) (I)	R	R (22mm) (I)	R (13mm)	S (27mm)	S (25mm)	S (21mm)	24	8	0
461	C45S3B2	Klebsiella pneumoniae	IR	R	R	R	14mm I	R	10mm R	R	29mm S	R	R	17mm S	R	R	R	R	17mm I	20mm S	R	R	R	10mm R	R (19mm) (I)	S (27mm)	R (20mm) (I)	R (19mm) (I)	R	R (22mm) (I)	R (14mm)	S (26mm)	S (25mm)	S (25mm)	25	7	0
462	C45S4B1	Escherichia coli	R	R	R	R	R	R	R	R	27mm S	10mm R	R	13mm R	R	15mm I	R	R	17mm I	11mm S	R	22mm S	20mm S	R	S (22mm)	S (32mm)	R	R (21mm) (I)	R	R (23mm) (I)	R (13mm)	R (20mm)	R (15mm)	R (10mm)	26	6	0
463	C45S5B1	Klebsiella pneumoniae	IR	12mm I	27mm S	R	13mm I	R	14mm S	R	19mm R	11mm R	R	13mm R	R	17mm S	R	R	15mm I	18mm S	R	20mm S	R	R	S (27mm)	S (28mm)	S (25mm)	S (23mm)	R	S (32mm)	R (15mm)	S (30mm)	S (29mm)	S (32mm)	19	13	0
464	C45S6B1	Klebsiella pneumoniae	IR	10mm R	R	R	11mm R	R	R	R	11mm R	R	14mm R	R	R	15mm I	R	R	17mm I	R	R	28mm S	R	R	R	S (29mm)	R	S (25mm)	R (11mm)	R (15mm)	R (11mm)	R (11mm)	R	R	29	3	0
465	C45S6B2	Escherichia coli	R	R	15mm I	R	10mm R	R	R	R	15mm R	R	R	R	R	R	R	R	18mm I	14mm S	R	20mm S	R	R	S (21mm)	S (26mm)	S (25mm)	R (21mm) (I)	R	S (26mm)	R (13mm)	S (26mm)	S (27mm)	S (26mm)	23	9	0
466	C45S7B1	Escherichia coli	R	20mm S	15mm I	R	R	R	10mm R	9mm	15mm R	R	R	R	R	9mm R	R	R	16mm I	25mm S	R	R	R	R	S (22mm)	S (30mm)	S (26mm)	R (21mm) (I)	R	S (27mm)	R (15mm)	S (29mm)	S (29mm)	S (25mm)	22	9	1
467	C46S1B1	Escherichia coli	R	R	R	11mm R	12mm I	R	10mm R	R	28mm S	R	34mm S	14mm R	R	16mm S	R	R	18mm I	21mm S	R	16mm I	19mm S	R	R (17mm) (I)	S (30mm)	R	R (21mm) (I)	R	R (22mm) (I)	R	R	R (15mm)	R	26	6	0
468	C46S1B2	Escherichia coli	R	R	R	R	15mm I	R	R	R	27mm S	15mm S	29mm S	13mm R	R	17mm S	R	R	R	16mm S	R	R	19mm S	R	R (20mm) (I)	S (29mm)	R	R (20mm) (I)	R	R (22mm) (I)	R (10mm)	R (20mm)	R (16mm)	R (11mm)	26	6	0
469	C46S2B1	Citrobacter werkmanii	R	R	R	R	R	R	10mm R	R	19mm R	17mm S	27mm S	17mm S	R	R	19mm S	R	18mm I	16mm S	R	14mm R	R	R	S (24mm)	S (28mm)	S (23mm)	S (32mm)	S (29mm)	S (30mm)	S (27mm)	S (31mm)	S (32mm)	S (27mm)	17	15	0
470	C46S2B2	Escherichia coli	R	22mm S	21mm S	R	13mm I	R	11mm R	R	24mm I	R	33mm S	15mm I	R	15mm I	R	R	17mm I	16mm S	R	21mm S	R	R	R (18mm) (I)	S (28mm)	S (25mm)	S (22mm)	R	S (25mm)	R (11mm)	S (28mm)	S (26mm)	S (23mm)	20	12	0
471	C46S3B1	Morganella morganii	IR	R	12mm R	R	IR	R	R	R	22mm I	R	32mm S	14mm R	R	16mm S	R	R	IR	R	R	R	R	R	R (12mm)	S (26mm)	R	R (20mm) (I)	R	R (10mm)	R (10mm)	R	R	R (10mm)	29	3	0
472	C46S3B2	Morganella Spp.	R	10mm R	10mm R	R	12mm I	14mm R	R	R	25mm S	17mm S	34mm S	20mm S	R	16mm S	13mm R	R	R	R	R	21mm S	R	R	R (12mm)	S (29mm)	R	R (21mm) (I)	R	R (10mm)	R (12mm)	R	R	R (17mm) (I)	24	8	0
473	C46S3B3	Escherichia coli	R	16mm S	R	R	14mm I	16mm R	10mm R	R	28mm S	14mm S	37mm S	17mm S	R	14mm I	14mm I	R	15mm I	20mm S	R	19mm S	R	8mm R	R	S (34mm)	R	S (22mm)	R	R (11mm)	R	R	R	R	23	9	0
474	C46S4B1	Escherichia coli	R	10mm R	18mm S	27mm S	R	18mm R	R	11mm	R	17mm S	32mm S	R	R	R	18mm S	R	R	20mm S	R	R	R	13mm I	S (26mm)	S (28mm)	R (19mm) (I)	R (21mm) (I)	R	S (25mm)	R (12mm)	R (22mm)	R (18mm)	S (21mm)	21	10	1
475	C46S4B2	Escherichia coli	R	9mm R	R	R	12mm I	R	14mm S	R	16mm R	R	27mm S	R	R	R	R	R	16mm I	16mm S	R	11mm R	R	R	R (13mm)	S (27mm)	R	S (22mm)	R	R (13mm)	R (14mm)	R (13mm)	R (10mm)	R (13mm)	27	5	0
476	C46S4B3	Klebsiella pneumoniae	IR	R	R	R	13mm I	R	15mm S	R	21mm I	21mm S	26mm S	19mm S	R	14mm I	R	R	16mm I	12mm S	R	11mm R	R	R	S (29mm)	S (33mm)	S (25mm)	S (23mm)	R	S (28mm)	R (15mm)	S (31mm)	S (30mm)	S (26mm)	19	13	0
477	C46S5B1	Escherichia coli	R	14mm S	22mm S	21mm I	R	29mm S	R	R	14mm R	R	32mm S	16mm I	R	14mm I	15mm I	R	R	11mm S	R	22mm S	R	17mm S	S (29mm)	S (28mm)	S (23mm)	S (23mm)	R	S (25mm)	R (15mm)	S (29mm)	S (28mm)	S (28mm)	17	15	0
478	C46S5B2(P)	Morganella morganii	IR	18mm S	27mm S	R	IR	R	R	10mm	24mm I	25mm S	30mm S	15mm I	R	15mm I	R	R	IR	18mm S	R	22mm S	R	R	R (20mm) (I)	S (30mm)	S (23mm)	R (19mm) (I)	R	R (24mm) (I)	R (12mm)	S (28mm)	S (28mm)	S (26mm)	20	11	1
479	C46S6B1	Proteus mirabilis	R	R	R	R	IR	19mm R	R	R	R	R	29mm S	R	R	R	19mm S	R	IR	R	R	R	R	IR	S (24mm)	S (26mm)	R (16mm)	R (18mm)	R	R (23mm) (I)	R (11mm)	R (24mm) (I)	R (22mm) (I)	S (22mm)	27	5	0
480	C46S6B2	Escherichia coli	R	R	15mm I	R	11mm R	R	10mm R	R	15mm R	13mm R	12mm R	14mm R	R	13mm R	R	R	14mm I	12mm S	R	12mm R	R	R	R	R (11mm)	R	R	R	R (11mm)	R	R	R	R	31	1	0
481	C47S1B1	Escherichia coli	R	10mm R	19mm S	R	10mm R	R	R	R	15mm R	13mm R	28mm S	R	R	8mm R	R	R	15mm I	19mm S	R	R	R	R	R (10mm)	S (28mm)	R	R (20mm) (I)	R	R (10mm)	R (11mm)	R (11mm)	R (10mm)	S (19mm)	27	5	0
482	C47S1B2	Citrobacter Spp.	R	R	21mm S	R	10mm R	R	R	R	20mm R	14mm S	26mm S	16mm I	R	15mm I	R	R	16mm I	R	R	18mm S	R	R	S (23mm)	S (33mm)	R (17mm)	S (26mm)	S (29mm)	S (31mm)	S (21mm)	S (30mm)	S (27mm)	S (20mm)	19	13	0
483	C47S2B1	Escherichia coli	R	15mm S	23mm S	R	12mm I	10mm R	8mm R	R	18mm R	16mm S	33mm S	R	R	10mm R	R	R	16mm I	20mm S	R	20mm S	R	8mm R	S(28mm)	S(31mm)	R	S(31mm)	S(32mm)	S(28mm)	S(25mm)	S(33mm)	S(32mm)	S(30mm)	17	15	0
484	C47S2B2	Escherichia coli	R	16mm S	24mm S	R	R	26mm S	R	R	21mm I	14mm S	32mm S	14mm R	R	14mm I	21mm S	R	17mm I	18mm S	R	20mm S	20mm S	R	S(22mm)	S(29mm)	S(24mm)	S(28mm)	S(29mm)	S(32mm)	S(26mm)	S(30mm)	S(29mm)	S(28mm)	13	19	0
485	C47S3B1	Lysinibacillus fusiformis	R	R	20mm S	R	13mm I	R	R	R	12mm R	12mm R	20mm R	R	R	13mm R	13mm R	R	R	R	R	13mm R	R	R	S(36mm)	S(35mm)	S(23mm)	S(23mm)	S(31mm)	S(36mm)	S(24mm)	S(36mm)	S(34mm)	S(32mm)	21	11	0
486	C47S3B2	Escherichia coli	R	R	R	R	R	R	R	R	19mm R	13mm R	30mm S	18mm S	R	12mm R	R	R	14mm I	R	R	19mm S	R	R	R	R(14mm)	R	R	R	R	R	R	R	R	29	3	0
487	C47S3B3	Escherichia coli	R	R	22mm S	R	11mm R	R	12mm I	R	20mm R	19mm S	27mm S	16mm I	R	14mm I	R	R	15mm I	17mm S	R	22mm S	R	R	R(20mm)	S(26mm)	S(25mm)	R	S(28mm)	S(30mm)	S(24mm)	R(21mm)	R	S(30mm)	21	11	0
488	C47S4B1	Morganella morganii	IR	27mm S	26mm S	R	IR	R	17mm S	14mm	25mm S	21mm S	24mm S	16mm I	R	21mm S	R	R	IR	19mm S	R	29mm S	R	R	S(27mm)	S(29mm)	S(23mm)	S(26mm)	S(29mm)	S(32mm)	S(25mm)	S(29mm)	S(30mm)	S(28mm)	12	19	1
489	C47S4B2	Escherichia coli	R	13mm S	20mm S	R	R	R	11mm R	R	21mm I	16mm S	34mm S	R	R	15mm I	R	R	19mm S	R	R	18mm S	R	12mm R	S(21mm)	S(34mm)	S(24mm)	S(30mm)	S(28mm)	S(31mm)	S(27mm)	S(32mm)	S(29mm)	S(28mm)	16	16	0
490	C47S4B3	Escherichia coli	R	14mm S	22mm S	R	R	R	10mm R	R	21mm I	14mm S	34mm S	R	R	16mm S	R	R	17mm I	R	R	19mm S	R	8mm R	R(10mm)	R	R	R	R(14mm)	R	R	R(10mm)	R(10mm)	R(11mm)	26	6	0
491	C47S5B1	Escherichia coli	R	R	R	R	12mm I	11mm R	12mm I	R	18mm R	12mm R	36mm S	13mm R	R	13mm R	R	R	16mm I	24mm S	R	13mm R	R	R	R	R(20mm)	R	R(10mm)	R(11mm)	R(18mm)	R	R	R	R	30	2	0
492	C47S6B1	Escherichia coli	R	19mm S	25mm S	R	13mm I	12mm R	14mm S	15mm	21mm I	17mm S	38mm S	18mm S	R	15mm I	13mm R	R	17mm I	R	R	21mm S	R	R	S(25mm)	S(33mm)	S(26mm)	S(29mm)	S(29mm)	S(33mm)	S(27mm)	S(34mm)	S(32mm)	S(31mm)	24	7	1
493	C47S6B2	Escherichia coli	R	12mm I	30mm S	R	17mm S	R	12mm I	R	27mm S	R	28mm S	10mm R	R	17mm S	R	R	15mm I	21mm S	R	22mm S	R	R	R	S(26mm)	R	R(15mm)	R	R(10mm)	R	R	R	R	24	8	0
494	C47S6B3	Proteus mirabilis	R	R	R	R	IR	17mm R	R	R	R	R	31mm S	R	R	10mm R	16mm I	R	IR	20mm S	R	17mm I	R	IR	S (29mm)	S (30mm)	S (29mm)	S (31mm)	S (33mm)	S (31mm)	S (28mm)	S (35mm)	S (33mm)	S (31mm)	20	12	0
495	C47S7B2	Escherichia coli	R	R	22mm S	R	12mm I	22mm R	10mm R	R	25mm S	12mm R	34mm S	14mm R	R	12mm R	19mm S	R	16mm I	22mm S	R	20mm S	R	R	R	S(32mm)	R	S(28mm)	R(13mm)	R(13mm)	R(14mm)	R	R	R(10mm)	24	8	0
496	C48S1B1	Escherichia coli	R	19mm S	R	R	12mm I	20mm R	17mm S	R	23mm I	17mm S	33mm S	18mm S	R	17mm S	R	R	21mm S	23mm S	R	22mm S	R	10mm R	R(18mm)	S(27mm)	S(22mm)	S(26mm)	S(27mm)	S(28mm)	S(23mm)	S(27mm)	S(27mm)	S(26mm)	14	18	0
497	C48S1B2	Escherichia coli	R	R	21mm S	R	16mm I	R	R	R	25mm S	15mm S	32mm S	17mm S	R	15mm I	R	R	14mm I	21mm S	R	20mm S	R	R	R	S (32mm)	R	S(27mm)	R(17mm)	R(17mm)	R (17mm)	R(11mm)	R	R(14mm)	23	9	0
498	C48S1B3	Morganella morganii	IR	R	24mm S	R	IR	R	R	R	15mm R	R	26mm S	10mm R	R	19mm S	15mm I	R	IR	19mm S	R	R	R	18mm S	S (25mm)	S (34mm)	S (22mm)	S (30mm)	S (34mm)	S (35mm)	S (24mm)	S (29mm)	S (33mm)	S (24mm)	17	15	0
499	C48S2B1	Proteus mirabilis	R	R	20mm S	R	IR	R	R	R	R	15mm S	28mm S	R	R	R	R	R	IR	17mm S	R	21mm S	R	IR	R (14mm) (I)	R	R	S (25mm)	S (27mm)	S(27mm)	S (21mm)	R (14mm)	R (10mm)	S (19mm)	21	10	0
500	C48S2B2	Proteus mirabilis	R	12mm I	21mm S	R	IR	R	R	R	R	14mm S	16mm R	R	R	R	R	R	IR	30mm S	R	12mm R	R	IR	R(12mm)	R	R	S(29mm)	S(24mm)	S(25mm)	S(22mm)	R(17mm)	R(15mm)	S(25mm)	24	8	0
501	C48S2B3	Morganella morganii	IR	R	24mm S	R	IR	R	20mm S	R	11mm R	R	22mm S	R	R	15mm I	R	R	IR	14mm S	R	R	R	13mm I	S (21mm)	S (26mm)	R	S (27mm)	S (29mm)	S (31mm)	R (11mm)	S (28mm)	S (27mm)	S (21mm)	22	10	0
502	C48S3B1	Providencia rettgeri	IR	R	R	19mm R	IR	R	R	R	R	R	27mm S	10mm R	R	12mm R	R	R	IR	21mm S	R	R	R	IR	R (15mm)	S (37mm)	R (13mm)	S (33mm)	S (27mm)	S (27mm)	S (23mm)	R (21mm)	R (19mm)	S (25mm)	24	8	0
503	C48S3B2	Citrobacter werkmanii	R	12mm I	18mm S	R	R	R	R	13mm	R	8mm R	30mm S	R	R	R	R	R	16mm I	14mm S	R	R	R	R	S (32mm)	S (35mm)	R (19mm) (I)	S (26mm)	S (37mm)	S (30mm)	S (29mm)	S (32mm)	S (31mm)	S (22mm)	19	12	1
504	C48S4B1	Morganella morganii	IR	R	21mm S	27mm S	IR	31mm S	18mm S	15mm	26mm S	15mm S	22mm S	19mm S	26mm S	27mm S	22mm S	18mm R	IR	36mm S	20mm S	18mm S	21mm S	16mm S	R(11mm)	S(27mm)	R	R(21mm)	R(17mm)	R(20mm)	R	R(10mm)	R	R	14	17	1
505	C48S4B2	Klebsiella pneumoniae	IR	R	R	R	14mm I	R	R	R	18mm R	15mm S	27mm S	R	R	16mm S	R	R	12mm R	R	R	R	R	R	R (18mm) (I)	S (31mm)	R (15mm)	S (24mm)	R (11mm)	S (26mm)	R	R (22mm)	R (18mm)	R (14mm)	26	6	0
506	C48S4B3	Morganella morganii	IR	R	R	13mm R	IR	28mm S	36mm S	R	28mm S	25mm S	36mm S	27mm S	20mm S	22mm S	R	R	IR	36mm S	R	R	22mm S	33mm S	R	R(19mm)	R	S(24mm)	R	R	R	R	R	R	20	12	0
507	C48S4B4	Morganella morganii	IR	R	17mm S	23mm S	IR	28mm S	32mm S	19mm	27mm S	R	33mm S	23mm S	19mm S	20mm S	21mm S	17mm R	IR	40mm S	21mm S	18mm S	R	16mm S	R	S(27mm)	R	S(22mm)	R(13mm)	R(19mm)	R	R	R	R	15	16	1
508	C48S5B1	Morganella morganii	IR	R	R	R	IR	R	12mm I	R	17mm R	22mm S	21mm S	R	R	19mm S	R	R	IR	R	R	R	R	R	R	R(19mm)	R	S(24mm)	R	R	R	R	R	R	28	4	0
509	C48S5B2	Aeromonas veronii	R	R	22mm S	R	15mm I	16mm R	15mm S	R	24mm I	12mm R	20mm R	R	R	15mm I	14mm I	R	20mm S	16mm S	R	R	R	14mm S	R	S (32mm)	R	S (26mm)	R	R (13mm)	R (11mm)	R	R	R	25	7	0
510	C48S5B3	Morganella morganii	IR	18mm S	18mm S	R	IR	26mm S	16mm S	R	23mm I	22mm S	26mm S	19mm S	21mm S	18mm S	20mm S	R	IR	21mm S	R	29mm S	32mm S	16mm S	S(23mm)	S(30mm)	R(16mm)	S(27mm)	S(26mm)	S(31mm)	R(20mm)	S(27mm)	S(25mm)	S(22mm)	10	22	0
511	C48S5B4	Enterobacter roggenkampii	R	R	R	R	15mm I	R	R	R	R	16mm S	26mm S	14mm R	R	15mm I	R	R	19mm S	R	R	21mm S	R	R	R (17mm) (I)	S (35mm)	R (12mm)	S (31mm)	R (14mm)	S (25mm)	R (14mm)	R (20mm)	R (18mm)	R (17mm) (I)	25	7	0
512	C48S6B1	Escherichia coli	R	R	R	R	10mm R	R	R	R	R	16mm S	28mm S	15mm I	R	16mm S	R	R	16mm I	17mm S	R	R	R	R	R(10mm)	S(31mm)	R	S(27mm)	R(17mm)	R(10mm)	R(16mm)	R(10mm)	R	R(13mm)	26	6	0
513	C48S6B2	Escherichia coli	R	R	19mm S	R	12mm I	R	R	R	24mm I	R	27mm S	16mm I	R	15mm I	R	R	R	17mm S	R	22mm S	R	R	R	S(26mm)	R	S(22mm)	R	R(10mm)	R	R	R	R	26	6	0
514	C48S7B1	Citrobacter Spp.	R	R	17mm S	R	11mm R	R	R	R	19mm R	14mm S	31mm S	15mm I	R	13mm R	R	R	16mm I	17mm S	R	14mm R	R	R	R(19mm)	S(24mm)	R(12mm)	R(19mm)	S(27mm)	R(21mm)	S(22mm)	R(21mm)	S(23mm)	S(20mm)	23	9	0
515	C49S1B1	Escherichia coli	R	R	R	R	15mm I	R	12mm I	R	29mm S	18mm S	34mm S	16mm I	R	17mm S	R	R	20mm S	23mm S	R	R	22mm S	R	S (22mm)	S (32mm)	R	S (23mm)	R	S (26mm)	R (15mm)	R (22mm)	R (19mm)	R	21	11	0
516	C49S1B2	Escherichia coli	R	10mm R	26mm S	R	13mm I	R	R	R	17mm R	R	25mm S	R	R	15mm I	R	R	R	16mm S	R	17mm I	R	R	R (11mm)	S (28mm)	R	R (19mm) (I)	R (20mm) (I)	R (24mm) (I)	R	R (13mm)	R	R	28	4	0
517	C49S1B3	Escherichia coli	R	R	22mm S	R	14mm I	R	R	R	23mm I	17mm S	34mm S	18mm S	R	17mm S	R	R	17mm I	21mm S	R	19mm S	R	R	R	S(26mm)	R	R(15mm)	R	R	R	R	R	R	24	8	0
518	C49S3B2	Escherichia coli	R	R	20mm S	R	R	R	R	R	19mm R	18mm S	32mm S	R	R	17mm S	R	R	19mm S	21mm S	R	R	R	R	S (26mm)	S (29mm)	S (23mm)	S (24mm)	R	S (27mm)	S (21mm)	S (29mm)	S (24mm)	S (19mm)	17	15	0
519	C49S2B1	Escherichia coli	R	10mm R	29mm S	R	14mm I	R	14mm S	R	17mm R	R	28mm S	R	R	19mm S	R	R	17mm I	20mm S	R	25mm S	R	R	R	S(32mm)	R	S(25mm)	R(19mm)	R(18mm)	R(18mm)	R	R	R(15mm)	24	8	0
520	C49S2B2	Providencia rettgeri	IR	R	R	R	IR	R	R	R	R	R	R	R	R	22mm S	R	R	IR	17mm S	R	20mm S	R	IR	R(17mm)	S(28mm)	R	S(28mm)	R(20mm)	R(19mm)	R	R(17mm)	R	R(16mm) (I)	27	5	0
521	C49S2B3_1	Morganella morganii	IR	R	29mm S	34mm S	IR	24mm I	12mm I	R	R	R	26mm S	19mm S	R	15mm I	21mm S	R	IR	22mm S	R	R	R	14mm S	S (28mm)	S (28mm)	S (23mm)	S (27mm)	S (27mm)	S (33mm)	S (25mm)	S (32mm)	S (31mm)	S (24mm)	15	17	0
522	C49S2B3_2	Morganella morganii	IR	R	26mm S	R	IR	R	R	R	12mm R	R	24mm S	R	R	17mm S	R	R	IR	16mm S	R	R	R	R	R(17mm)	S(34mm)	R	S(31mm)	S(24mm)	S(29mm)	S(26mm)	R(25mm)	R(22mm)	S(29mm)	22	10	0
523	C49S3B1	Escherichia coli	R	12mm I	30mm S	R	15mm I	R	R	R	15mm R	R	33mm S	R	R	18mm S	R	R	11mm R	22mm S	R	24mm S	R	R	S(32mm)	S(35mm)	S(28mm)	S(30mm)	R	S(32mm)	S(23mm)	S(30mm)	S(28mm)	S(28mm)	18	14	0
524	C49S3B3	Providencia rettgeri	IR	R	R	20mm I	IR	R	R	R	R	R	28mm S	18mm S	R	17mm S	R	R	IR	15mm S	R	R	R	IR	R(18mm)	S(27mm)	R	S(25mm)	S(21mm)	R(21mm)	R	R(17mm)	R(15mm)	R(17mm)	25	7	0
525	C49S4B1	Enterobacter roggenkampii	R	R	R	R	15mm I	R	R	R	R	18mm S	28mm S	10mmR	R	19mm S	R	R	R	17mm S	R	22mm S	R	R	R	S (34mm)	R	R (17mm)	R (14mm)	R (17mm)	R (13mm)	R (10mm)	R	R	26	6	0
526	C49S4B2	Klebsiella pneumoniae	IR	10mm R	29mm S	R	R	R	14mm S	R	25mm S	R	34mm S	R	R	14mm I	R	R	17mm I	19mm S	R	26mm S	19mm S	10mm R	R (12mm)	S (31mm)	R	S (27mm)	R (19mm) (I)	R (19mm) (I)	R (18mm) (I)	R (14mm)	R (11mm)	R (15mm)	23	9	0
527	C49S5B1	Aeromonas simiae	36mm S	25mm S	R	38mm S	10mm R	34mm S	36mm S	30mm	R	27mm S	38mm S	30mm S	26mm S	23mm S	22mm S	38mm S	R	R	25mm S	R	R	R	R (17mm) (I)	S (37mm)	R	S (36mm)	S (23mm)	R (18mm)	R (17mm)	R (21mm)	S (24mm)	R	14	18	1
528	C49S5B2	Klebsiella pneumoniae	IR	R	R	11mm R	12mm I	R	R	R	R	18mm S	28mm S	15mm I	R	22mm S	R	R	17mm I	R	R	22mm S	R	R	S(29mm)	S(31mm)	S(28mm)	S(23mm)	R	R(24mm)	R	S(30mm)	S(27mm)	S(28mm)	21	11	0
529	C49S5B3	Klebsiella pneumoniae	IR	R	17mm S	R	12mm I	R	R	R	16mm R	15mm S	27mm S	R	R	16mm S	22mm S	32mm S	R	14mm S	R	20mm S	30mm S	R	R(17mm)	S(31mm)	R	S(27mm)	R(19mm)	R(24mm)	R(18mm)	R(18mm)	R(14mm)	S(20mm)	20	12	0
530	C49S5B4	Providencia rettgeri	IR	R	R	26mm S	IR	R	R	R	R	R	29mm S	18mm S	R	17mm S	R	R	IR	14mm S	R	R	R	IR	S(25mm)	S(33mm)	R(20mm)	S(29mm)	S(29mm)	S(32mm)	S(23mm)	S(29mm)	S(29mm)	S(28mm)	18	14	0
531	C49S6B1	Escherichia coli	R	R	28mm S	R	16mm I	R	10mm R	R	10mm R	18mm S	31mm S	20mm S	R	16mm S	R	R	18mm I	19mm S	R	23mm S	R	R	R	S(28mm)	R	S(22mm)	R	R	R	R	R	R	23	9	0
532	C49S6B2	klebsiella michiganensis	R	R	27mm S	R	12mm I	R	R	R	R	R	12mm R	R	R	R	R	R	17mm I	15mm S	R	22mm S	14mm I	R	R (15mm)	R (21mm) (I)	R	R (16mm)	S (35mm)	S (26mm)	R	R (16mm)	R (11mm)	R	27	5	0
533	C49S7B1	Escherichia coli	R	R	25mm S	R	12mm I	26mm S	R	R	R	15mm S	35mm S	16mm I	R	R	23mm S	R	R	R	R	20mm S	R	R	R(12mm)	S(33mm)	R	S(33mm)	R(19mm)	R(21mm)	S(21mm)	R(12mm)	R	R(18mm)	23	9	0
534	C49S7B2	Escherichia coli	R	10mm R	10mm R	R	14mm I	R	14mm S	R	10mm R	18mm S	16mm R	R	R	16mm S	R	R	20mm S	21mm S	R	12mm R	R	R	R	R(15mm)	R	R	R(15mm)	R(13mm)	R	R	R	R	27	5	0
535	C49S7B3	Morganella morganii	IR	R	R	R	IR	R	R	R	R	20mm S	R	20mm S	R	R	20mm S	34mm S	IR	R	R	26mm S	23mm S	30mm S	R	S(30mm)	R	S(26mm)	R(17mm)	R(18mm)	R(17mm)	R	R	R(15mm)	23	9	0
536	C50S1B1	Escherichia coli	R	R	R	R	R	R	R	R	20mm R	16mm S	32mm S	15mm I	R	16mm S	R	R	15mm I	R	R	22mm S	17mm S	R	R(20mm)	S(32mm)	R	S(28mm)	R(20mm)	S(30mm)	R(14mm)	R(19mm)	R(16mm)	R	24	8	0
537	C50S1B2	Morganella morganii	IR	27mm S	22mm S	R	IR	22mm R	14mm S	R	R	19mm S	29mm S	20mm S	R	20mm S	R	R	IR	19mm S	R	R	R	16mm S	R (14mm)	S (36mm)	R	S (30mm)	S (26mm)	R (24mm) (I)	S (23mm)	R (20mm)	R (19mm)	S (24mm)	18	14	0
538	C50S1B3	Escherichia coli	R	R	13mm R	R	13mm I	R	R	R	R	14mm S	32mm S	14mm R	R	17mm S	R	R	17mm I	18mm S	R	R	R	R	R	S(27mm)	R	S(24mm)	R(16mm)	R(15mm)	R(17mm)	R	R	R(14mm)	26	6	0
539	C50S2B1	Escherichia coli	R	R	R	R	13mm I	R	8mm R	R	24mm I	R	15mm R	R	R	15mm I	R	R	18mm I	R	R	12mm R	R	R	R	R(14mm)	R	R	R	R	R	R	R	R	32	0	0
540	C50S2B2	Acinetobactor baumanii	IR	R	IR	R	R	29mm S	R	R	R	R	34mm S	30mm S	24mm S	R	R	R	16mm I	24mm S	R	R	IR	21mm S	R	R (10mm)	R	R	R (14mm)	R (13mm)	R	R	R	R	26	6	0
541	C50S2B3	Escherichia coli	R	R	R	R	R	R	R	R	23mm I	15mm S	28mm S	16mm I	R	R	R	R	16mm I	17mm S	R	14mm R	R	R	R	S(31mm)	R	S(27mm)	R(13mm)	R(16mm)	R(15mm)	R	R	R	27	5	0
542	C50S3B1	Providencia rettgeri	IR	R	R	18mm R	IR	18mm R	29mm S	R	16mm R	19mm S	R	R	R	13mm R	14mm I	R	IR	23mm S	R	R	R	IR	S(21mm)	S(31mm)	R(10mm)	S(26mm)	S(23mm)	R(24mm)	R(15mm)	R(21mm)	S(23mm)	S(21mm)	23	9	0
543	C50S3B2	Providencia rettgeri	IR	R	R	R	IR	R	R	R	16mmR	15mm S	23mm S	15mm I	R	14mm I	R	R	IR	R	R	14mm R	R	IR	S (27mm)	S (34mm)	S (23mm)	S (30mm)	S (33mm)	S (36mm)	S (21mm)	S (29mm)	S (31mm)	S (25mm)	24	12	0
544	C50S3B3	Providencia rettgeri	IR	R	R	19mm R	IR	R	R	R	R	12mm R	27mm S	14mm R	R	12mm R	R	R	IR	12mm S	R	R	R	IR	S(23mm)	S(28mm)	R(19mm)	S(27mm)	S(26mm)	S(27mm)	R(20mm)	S(26mm)	S(27mm)	S(23mm)	22	10	0
545	C50S4B1	Escherichia coli	R	R	19mm S	R	12mm I	R	R	R	19mm I	R	28mm S	13mm R	R	13mm R	R	R	14mm I	R	R	20mm S	R	R	R(18mm)	S(28mm)	S(21mm)	S(27mm)	S(24mm)	S(27mm)	S(22mm)	S(28mm)	S(28mm)	S(27mm)	20	12	0
546	C50S4B2	Escherichia coli	R	R	R	R	R	R	R	R	15mm R	18mm S	28mm S	17mm S	R	15mm I	R	R	17mm I	20mm S	R	21mm S	R	R	R(19mm)	S(26mm)	R(13mm)	R(16mm)	S(22mm)	S(25mm)	R(18mm)	R(23mm)	R(22mm)	R(16mm) (I)	24	8	0
547	C50S4B3	Klebsiella quasipneumoniae	R	R	R	R	12mm I	R	11mm R	R	15mm R	14mm S	R	R	R	13mm R	R	R	17mm I	R	R	R	R	10mm R	S (27mm)	S (34mm)	S (22mm)	S (27mm)	S (31mm)	S (34mm)	S (22mm)	S (32mm)	S (32mm)	S (20mm)	21	11	0
548	C50S5B1	Klebsiella pneumoniae	IR	R	R	R	12mm I	R	R	R	R	15mm S	25mm S	R	R	R	R	R	15mm I	R	R	15mm I	R	R	R	S(29mm)	R	R(21mm)	R	R	R	R	R	R	29	3	0
549	C50S5B2	Escherichia coli	R	R	13mm R	R	14mm I	R	R	R	26mm S	10mm R	25mm S	15mm I	R	14mm I	R	R	18mm I	20mm S	R	20mm S	R	R	R(17mm)	S(24mm)	R	R(20mm)	S(22mm)	S(28mm)	R(19mm)	R(21mm)	S(24mm)	R(13mm)	24	8	0
550	C50S6B1	Escherichia coli	16mm S	R	R	R	R	19mm R	R	R	R	R	29mm S	R	R	R	19mm S	R	12mm I	R	R	R	R	R	R	S(23mm)	R	R(19mm)	R	R	R	R	R	R	29	3	0
551	C50S6B2	Escherichia coli	R	R	R	R	R	R	R	R	21mm I	R	16mm R	R	R	13mm R	R	R	R	17mm S	R	R	R	R	R	R(13mm)	R	R	R	R	R	R	R	R	31	1	0
552	C50S6B3	Morganella morganii	IR	R	R	30mm S	IR	23mm I	25mm S	R	R	19mm S	31mm S	18mm S	R	14mm I	18mm S	26mm I	IR	R	R	22mm S	18mm S	R	S(26mm)	S(30mm)	S(22mm)	S(25mm)	S(26mm)	S(27mm)	S(24mm)	S(26mm)	S(31mm)	S(26mm)	14	18	0
553	C50S6B4	Providencia vermicola	R	R	R	32mm S	R	R	31mm S	25mm	20mm R	27mm S	34mm S	21mm S	R	26mm S	26mm S	32mm S	18mm I	27mm S	R	26mm S	R	24mm S	S(22mm)	S(30mm)	R	S(26mm)	S(26mm)	S(29mm)	R(17mm)	R(22mm)	S(26mm)	R(18mm)	14	17	1
554	C50S7B1	Escherichia coli	R	R	17mm S	R	R	R	R	R	21mm I	14mm S	28mm S	R	14mm R	14mm I	R	R	16mm I	19mm S	R	R	R	R	R(18mm)	S(30mm)	R	S(29mm)	S(21mm)	S(30mm)	R(19mm)	R(18mm)	R(13mm)	S(22mm)	23	9	0
555	C50S7B2	Escherichia coli	R	R	11mm R	R	11mm R	R	R	R	21mm I	14mm S	27mm S	15mm I	R	15mm I	R	R	14mm I	17mm S	R	R	R	R	R(20mm)	S(27mm)	R(14mm)	R(21mm)	S(24mm)	S(31mm)	R(20mm)	R(23mm)	S(25mm)	R(16mm) (I)	25	7	0
556	C50S7B3	Escherichia coli	R	R	17mm S	R	12mm I	R	R	R	R	R	27mm S	15mm I	R	14mm I	R	R	R	17mm S	R	17mm I	R	R	R	S(26mm)	R	R(19mm)	R	R	R	R	R	R	28	4	0
557	HR1S1B1	Morganella morganii	IR	10mm R	R	R	IR	R	R	R	10mm R	R	15mm R	R	R	12mm R	R	R	IR	16mm S	R	R	R	R	S (22mm)	S (26mm)	S (22mm)	R (20mm)	S (31mm)	S (29mm)	S (26mm)	S (26mm)	S (30mm)	S (19mm)	22	10	0
558	KOL1S1B1	Pseudomonas putida	R	R	12mm R	R	R	R	10mm R	R	R	R	25mm S	22mm S	R	12mm R	R	R	10mm R	30mm S	R	22mm S	R	R	R (19mm) (I)	S (24mm)	R	R (13mm)	R (16mm)	S (26mm)	S (21mm)	R (20mm)	R (20mm) (I)	R(16mm) (I)	25	7	0
559	KOL1S1B2	Escherichia coli	R	R	R	R	11mm R	14mm R	R	R	23mm I	R	28mm S	14mm R	R	11mm R	R	R	10mm R	22mm S	R	R	R	R	R (11mm)	S (33mm)	R	S (30mm)	R (17mm)	R (21mm) (I)	R (19mm) (I)	R (12mm)	R (11mm)	R	28	4	0
560	KOL1S1B3	Escherichia coli	R	R	21mm S	R	R	R	R	R	21mm I	R	23mm S	14mm R	R	12mm R	R	R	10mm R	20mm S	R	R	20mm S	R	R	S(31mm)	R	S (30mm)	R(17mm)	R(19mm)	R (17mm)	R	R	R(14mm)	26	6	0
561	KOL1S2B1	Pseudomonas spp.	R	R	R	R	8mm R	14mm R	R	R	R	R	R	R	R	11mm R	R	R	10mm R	16mm S	R	11mm R	R	R	R	R	R	R	R (19mm) (I)	R	R	R	R	R (14mm)	31	1	0
562	KOL1S2B2	Escherichia coli	R	R	23mm S	R	8mm R	11mm R	R	R	20mm R	R	28mm S	23mm S	R	R	R	R	10mm R	18mm S	R	21mm S	R	R	S (22mm)	S (30mm)	R (12mm)	S (25mm)	S (33mm)	S (33mm)	R (20mm) (I)	R (18mm)	R (14mm)	R	22	10	0
563	KOL1S3B1	Citrobacter freundii	IR	R	R	R	8mm R	R	R	R	R	R	R	15mm I	R	12mm R	R	R	10mm R	21mm S	R	R	R	R	R (17mm) (I)	R (20mm) (I)	R	R (11mm)	R (10mm)	R (22mm) (I)	R (19mm) (I)	R (15mm)	R (11mm)	S (23mm)	30	2	0
564	KOL1S3B2	Pseudomonas putida	R	R	12mm R	R	8mm R	R	R	R	16mm R	R	R	22mm S	R	R	R	R	10mm R	R	R	16mm I	20mm S	R	S(22mm)	S(27mm)	R(14mm)	S(22mm)	S (26mm)	S(29mm)	S (21mm)	S(28mm)	S(25mm)	S (21mm)	21	11	0
565	KOL1S3B3	Pseudomonas putida	R	R	R	R	8mm R	R	R	R	R	R	12mm R	R	R	R	R	R	12mm R	12mm S	R	R	R	R	R	R	R	R	R	R	R	R	R	R	31	1	0
566	KOL2S2B1	Achromobacter spp.	R	R	R	R	R	21mm R	R	R	23mm I	R	32mm S	15mm I	R	14mm I	20mm S	R	R	20mm S	R	20mm S	R	R	S (27mm)	S (36mm)	S (28mm)	S (34mm)	S (35mm)	S (35mm)	S (30mm)	S (33mm)	S (36mm)	S (30mm)	18	14	0
567	KOL2S2B3	Escherichia coli	R	R	16mm I	R	8mm R	17mm R	8mm R	R	17mm R	13mm R	19mm R	13mm R	10mm R	12mm R	16mm I	R	12mm R	17mm S	R	18mm S	R	R	R(14mm)	S (29mm)	R	S(22mm)	R(19mm)	R(21mm)	R (19mm) (I)	R(15mm)	R (13mm)	R (18mm) (I)	28	4	0
568	KOL3S3B1	Escherichia coli	R	R	R	R	13mm I	12mm R	R	R	22mm I	R	30mm S	17mm S	R	16mm S	13mm R	R	R	12mm S	R	18mm S	R	R	S(23mm)	S (29mm)	R(19mm)	S (23mm)	R	S(31mm)	R (20mm) (I)	S(29mm)	S(24mm)	S(25mm)	20	12	0
569	KOL3S3B2	Aeromonas simiae	R	R	27mm S	10mm R	14mm I	R	11mm R	R	27mm S	15mm S	30mm S	R	16mm I	R	R	R	15mm I	20mm S	R	18mm S	R	R	R(18mm)	S (29mm)	R	R(21mm)	R(11mm)	S (27mm)	R (11mm)	R(19mm)	R(15mm)	R	24	8	0
570	JH1S1B1	Proteus mirabilis	R	R	21mm S	R	IR	R	R	R	20mm R	16mm S	33mm S	15mm I	R	16mm S	R	R	IR	19mm S	R	19mm S	R	IR	S(28mm)	S(33mm)	S(22mm)	S(29mm)	S(29mm)	R	S(26mm)	S(32mm)	S(28mm)	S(26mm)	17	15	0
571	JH1S1B2	Escherichia coli	R	R	25mm S	R	12mm I	R	R	R	23mm I	15mm S	32mm S	16mm I	R	16mm S	R	R	15mm I	21mm S	R	21mm S	R	R	S(28mm)	S(32mm)	S(26mm)	S(31mm)	S(28mm)	S(35mm)	S(27mm)	S(30mm)	S(28mm)	S(28mm)	16	16	0
572	JH1S1B3	Proteus mirabilis	R	17mm S	33mm S	30mm S	IR	26mm S	36mm S	R	22mm I	R	34mm S	R	14mm R	25mm S	25mm S	36mm S	IR	36mm S	R	R	31mm S	IR	S(30mm)	S(31mm)	S(25mm)	S(30mm)	S(34mm)	S(34mm)	S(26mm)	S(32mm)	S(33mm)	S(30mm)	11	21	0
573	JH1S1B5	Comamonas aquatica	R	R	8mm R	13mm R	16mm I	8mm R	20mm S	R	22mm I	R	20mm R	R	R	R	R	R	20mm S	16mm S	R	R	R	16mm S	R (10mm)	R (18mm)	R	R (11mm)	R	R (15mm)	R	R (11mm)	R (10mm)	R (13mm)	28	4	0
574	JH1S2B1	Klebsiella michiganensis	R	R	R	R	13mm I	17mm R	R	R	27mm S	14mm S	34mm S	8mm R	R	15mm I	14mm I	R	18mm I	16mm S	R	21mm S	21mm S	R	S(21mm)	S(26mm)	R(18mm)	R (20mm)	S(21mm)	R	S(25mm)	R(24mm)	R(22mm)	S(26mm)	21	11	0
575	JH1S2B2	Escherichia coli	R	R	20mm S	R	12mm I	R	R	R	24mm I	16mm S	27mm S	16mm I	R	15mm I	R	R	15mm I	19mm S	R	21mm S	R	R	R (11mm)	S (35mm)	R	S (32mm)	R (20mm) (I)	R (20mm) (I)	R (19mm) (I)	R (14mm)	R (11mm)	S (28mm)	24	8	0
576	JH1S8B1	Escherichia coli	R	R	15mm I	R	12mm I	R	R	R	21mm I	R	27mm S	15mm I	R	17mm S	R	R	15mm I	19mm S	R	21mm S	R	R	R	S(28mm)	R	S(24mm)	R	R(10mm)	R	R	R	R	26	6	0
577	JH1S10B1	Pseudomonas putida	R	R	R	R	13mm R	12mm R	R	R	R	16mm S	32mm S	R	R	14mm I	R	R	15mm I	16mm S	R	13mm R	R	R	R (19mm) (I)	S (23mm)	R	R (13mm)	R (19mm) (I)	S (27mm)	S (25mm)	R (20mm)	R (19mm)	R (14mm)	26	6	0
578	CG1S1B1	Aeromonas spp.	R	19mm S	22mm S	R	R	R	21mm S	15mm	13mm R	11mm R	R	19mm S	R	R	17mm S	R	11mm R	15mm S	R	R	R	17mm S	S (21mm)	S (33mm)	R (20mm) (I)	S (25mm)	S (39mm)	S (37mm)	S (31mm)	S (33mm)	S (27mm)	R	16	15	1
579	CG1S1B2	Escherichia coli	R	22mm S	28mm S	R	14mm I	R	R	R	20mm R	18mm S	22mm S	R	R	12mm R	12mm R	R	10mm R	R	R	20mm S	R	R	R (10mm)	S (34mm)	R	S (28mm)	R (15mm)	R (17mm)	R (18mm) (I)	R (10mm)	R (10mm)	R (13mm)	25	7	0
580	CG1S1B3	Escherichia coli	R	9mm R	13mm R	R	R	R	R	16mm	R	11mm R	15mm R	R	R	11mm R	12mm R	R	11mm R	17mm S	R	12mm R	R	11mm R	R (15mm)	S (32mm)	R	S (30mm)	R (19mm) (I)	S (25mm)	S (23mm)	R (16mm)	R (12mm)	R	26	5	1
581	CG2S2B2	Achromobacter spp.	R	15mm S	R	R	26mm S	18mm R	19mm S	R	23mm I	R	21mm S	16mm I	R	15mm I	18mm S	R	R	20mm S	R	20mm S	27mm S	R	R(17mm)	S(26mm)	R	R(19mm)	S(21mm)	S(30mm)	R(15mm)	R(22mm)	S(22mm)	R	20	12	0
582	CG2S3B3(RED)	Escherichia coli	R	11mm R	R	R	14mm I	R	13mm S	R	25mm S	R	28mm S	R	R	R	R	R	15mm I	20mm S	R	24mm S	R	R	S(22mm)	S (28mm)	R(16mm)	S (24mm)	S(26mm)	S(30mm)	R(19mm)	R(25mm)	S(24mm)	R(17mm)	20	12	0
583	CG2S4B1	Citrobacter freundii	IR	R	R	R	15mm I	R	R	R	26mm S	R	R	R	R	R	R	R	17mm I	R	R	R	R	R	R(17mm)	R(15mm)	R(10mm)	R	R(19mm)	R (14mm)	S (22mm)	R(21mm)	R (14mm)	S (21mm)	29	3	0
584	CG2S4B1(LP)	Escherichia coli	R	R	R	R	13mm I	R	R	R	20mm R	R	R	R	R	R	R	R	R	R	R	R	R	R	R	R(17mm)	R	R	S(28mm)	R(13mm)	R	R	R	R	32	0	0
585	CG2S4(RED)	Escherichia coli	R	R	R	R	R	R	R	R	22mm I	15mm S	R	R	R	15mm I	R	R	15mm I	20mm S	R	25mm S	R	R	S(24mm)	S(34mm)	S(25mm)	S(32mm)	S(30mm)	S(34mm)	S(28mm)	S(31mm)	S(32mm)	S(30mm)	19	13	0
586	CG2S4(PURPLE)	Enterobacter spp.	R	10mm R	R	R	R	R	R	R	22mm I	R	R	R	R	15mm I	15mm I	R	16mm I	16mm S	R	R	R	R	R(13mm)	S(33mm)	R	S(29mm)	R(17mm)	R(18mm)	R(15mm)	R(12mm)	R(10mm)	R(14mm)	29	3	0
587	CG3S1B1	Pseudomonas spp.	R	R	R	R	15mm I	23mm I	14mm S	R	R	19mm S	39mm S	8mm R	R	15mm I	19mm S	18mm R	R	15mm S	R	19mm S	R	R	S (34mm)	S (34mm)	S (36mm)	S (27mm)	R	R (21mm)	R (18mm) (I)	S (28mm)	S (26mm)	R	20	12	0
588	CG3S2B1	Pseudomonas spp.	R	R	R	R	17mm S	20mm R	11mm R	R	R	22mm S	38mm S	R	R	16mm S	19mm S	20mm R	R	18mm S	R	18mm S	R	R	R(17mm)	R(20mm)	R	R(11mm)	R(17mm)	R(24mm)	S(22mm)	R(19mm)	R(19mm)	R(16mm) (I)	24	8	0
589	CG3S5B1	Escherichia coli	R	R	27mm S	R	12mm I	R	R	R	28mm S	15mm S	38mm S	17mm S	R	14mm I	R	R	15mm I	18mm S	R	12mm R	R	R	R(16mm)	S(33mm)	R	S(30mm)	S(22mm)	S(26mm)	R(20mm)	R(17mm)	R(12mm)	S(19mm)	21	11	0
590	CG3S5B3	Escherichia coli	R	10mm R	24mm S	R	12mm I	R	13mm S	R	22mm I	14mm S	31mm S	15mm I	R	15mm I	R	R	13mm R	19mm S	R	20mm S	R	R	R(15mm)	S(34mm)	R	S(25mm)	S(21mm)	S(26mm)	R(20mm)	R(17mm)	R(13mm)	S(20mm)	21	11	0
591	CG3S6B1	Enterobacter hormaechei	18mm S	21mm S	R	24mm S	16mm I	29mm S	17mm S	24mm	R	17mm S	31mm S	19mm S	28mm S	17mm S	20mm S	28mm I	R	R	26mm S	R	R	16mm S	R(11mm)	S (34mm)	R	S (25mm)	R(12mm)	R(19mm)	R	R(11mm)	R (10mm)	R(16mm) (I)	16	16	1
592	CG3S6B2	Aeromonas simiae	15mm S	24mm S	R	26mm S	13mm I	26mm S	17mm S	32mm	R	20mm S	30mm S	18mm S	26mm S	19mm S	23mm S	34mm S	R	R	21mm S	R	R	19mm S	R(12mm)	S(35mm)	R	S (24mm)	R(14mm)	R (20mm) (I)	R	R(14mm)	R (11mm)	R (17mm) (I)	15	17	1
593	CG3S7B1	Escherichia coli	R	R	25mm S	R	R	R	R	R	26mm S	16mm S	36mm S	15mm I	R	16mm S	R	R	16mm I	21mm S	R	22mm S	R	R	S(28mm)	S(35mm)	S(25mm)	S(30mm)	S(30mm)	S(35mm)	S(29mm)	S(34mm)	S(31mm)	S(31mm)	15	17	0
594	CG3S7B2	Morganella morganii	IR	R	10mm R	R	IR	R	R	R	11mm R	R	27mm S	10mmR	R	13mm R	R	R	IR	R	R	16mm I	R	14mm S	S (21mm)	S (31mm)	S (24mm)	S (28mm)	S (30mm)	S (30mm)	S (27mm)	S (33mm)	S (34mm)	S (29mm)	20	12	0
595	CG3S8B1	Staphylococcus hominis	R	24mm S	30mm S	R	R	19mm R	38mm S	R	30mm S	28mm S	38mm S	28mm S	R	R	R	R	17mm I	34mm S	19mm S	R	R	30mm S	S (23mm)	S (36mm)	S(19mm)	S (25mm)	R	S (29mm)	S(20mm)	R	S (28mm)	S (19mm)	14	18	0
596	UPS1B1	Escherichia coli	R	R	R	R	14mm I	10mm R	R	R	16mm R	R	21mm S	R	R	10mm R	13mm R	R	14mm I	15mm S	R	R	R	R	R (13mm)	S (33mm)	R	S (29mm)	S (21mm)	R(22mm)	R (20mm) (I)	R (15mm)	R (13mm)	R (15mm)	27	5	0
597	UPS2B1	Morganella morganii	IR	R	28mm S	R	IR	17mm R	11mm R	R	19mm R	R	19mm R	R	R	15mm I	23mm S	R	IR	27mm S	R	R	R	R	R(18mm)	R(22mm)	R(17mm)	R(21mm)	R(19mm)	S(25mm)	R(20mm)	R(21mm)	S(23mm)	S(20mm)	26	6	0
598	UPS2B2	Morganella morganii	IR	R	27mm S	30mm S	IR	23mm I	10mm R	R	11mm R	R	16mm R	18mm S	R	R	21mm S	R	IR	17mm S	R	R	R	R	S (22mm)	S (29mm)	S (22mm)	S (23mm)	S (27mm)	S (29mm)	S (21mm)	S (27mm)	S (27mm)	S (23mm)	17	15	0
599	UPS2B3	Morganella morganii	IR	R	R	31mm S	IR	23mm I	11mm R	R	15mm R	R	21mm S	R	R	15mm I	21mm S	R	IR	16mm S	R	18mm S	R	R	R(19mm)	R(22mm)	R(17mm)	R(19mm)	R(20mm)	R(22mm)	R(18mm)	R(22mm)	R(21mm)	S(20mm)	26	6	0
600	UPS2B4	Escherichia coli	R	R	20mm S	R	12mm I	R	8mm R	R	15mm R	R	20mm R	16mm I	R	R	R	R	15mm I	17mm S	R	12mm R	11mm R	R	R (14mm) (I)	S (33mm)	R	S (30mm)	S (22mm)	R (23mm) (I)	S (21mm)	R (16mm)	R (14mm)	R (17mm) (I)	26	6	0
601	UPS3B1	Escherichia coli	R	R	R	R	13mm I	11mm R	R	R	15mm R	R	20mm R	R	R	11mm R	15mm I	R	16mm I	16mm S	R	R	R	R	R	S(26mm)	R	S(22mm)	R(18mm)	R(18mm)	R(16mm)	R	R	R(14mm)	29	3	0
602	UPS3B2	Citrobacter portucalensis	R	17mm S	13mm R	R	13mm I	R	13mm S	R	12mm R	R	12mm R	11mm R	R	12mm R	R	R	15mm I	15mm S	R	18mm S	20mm S	R	R (10mm)	S (28mm)	R	S (24mm)	R (13mm)	R (15mm)	R	R (12mm)	R (10mm)	R	25	7	0
603	UPS3B3	Proteus mirabilis	R	R	R	19mm R	IR	14mm R	R	R	R	R	19mm R	R	R	R	16mm I	R	IR	R	R	16mm I	R	IR	S (24mm)	S (32mm)	R (11mm)	S (29mm)	R	R (15mm)	R	R (19mm)	R (20mm) (I)	R	29	3	0
604	UPS4B2	Acinetobactor baumanii	IR	18mm S	IR	R	14mm I	15mm R	R	R	16mm R	12mm R	33mm S	16mm I	R	14mm I	18mm S	R	16mm I	16mm S	R	18mm S	IR	R	R	R	R	R	R (16mm)	R (10mm)	R	R	R	R	27	5	0
605	UPS4B3	Morganella morganii	IR	R	R	28mm S	IR	20mm R	10mm R	R	13mm R	R	19mm R	R	R	14mm I	20mm S	R	IR	15mm S	R	17mm I	R	R	S (23mm)	S (29mm)	S (21mm)	S (25mm)	S (27mm)	S (29mm)	S (26mm)	S (30mm)	S (30mm)	S (29mm)	19	13	0
606	UPS4B4	Klebsiella pneumoniae	IR	R	25mm S	R	13mm I	R	11mm R	R	22mm I	R	27mm S	R	R	R	R	R	17mm I	15mm S	R	R	12mm I	R	R (16mm) (I)	S (36mm)	R	S (31mm)	S (21mm)	S (25mm)	S (21mm)	R (19mm)	R (14mm)	R (17mm) (I)	24	8	0
607	UPS5B1	Escherichia coli	R	11mm R	21mm S	R	13mm I	8mm R	11mm R	R	15mm R	R	32mm S	15mm I	R	R	10mm R	R	15mm I	23mm S	R	22mm S	17mm S	R	R (16mm) (I)	S (35mm)	R	S (32mm)	S (26mm)	S (27mm)	S (25mm)	R (19mm)	R (17mm)	R	22	10	0
608	UPS5B2(LP)	Escherichia coli	R	R	20mm S	R	13mm I	R	R	R	17mm R	R	28mm S	15mm I	R	18mm S	R	R	14mm I	26mm S	R	21mm S	R	R	R	S(31mm)	R	S(27mm)	R(19mm)	R(19mm)	R(17mm)	R	R	R	25	7	0
609	UPS5B2(P)	klebsiella michiganensis	R	11mm R	R	R	12mm I	R	R	R	16mm R	R	R	R	R	R	R	R	15mm I	14mm S	R	17mm I	17mm S	R	R (12mm)	S (24mm)	R (12mm)	R (13mm)	S (26mm)	S (26mm)	R	R (11mm)	R (10mm)	R	27	5	0
610	UPS6B2	Escherichia coli	R	R	11mm R	R	12mm I	R	8mm R	R	R	R	R	16mm I	R	14mm I	R	R	15mm I	12mm S	R	11mm R	R	R	R (12mm)	S (33mm)	R	S (28mm)	R (20mm) (I)	R (20mm) (I)	R (19mm) (I)	R (15mm)	R (11mm)	R (15mm)	29	3	0
611	UPS6B3	Citrobacter werkmanii	R	15mm S	11mm R	R	12mm I	R	14mm S	R	13mm R	R	18mm R	10mmR	R	12mm R	R	R	13mm R	15mm S	R	16mm I	R	R	S (23mm)	S (31mm)	S (23mm)	S (26mm)	S (33mm)	S (33mm)	S (27mm)	S (33mm)	S (31mm)	S (23mm)	19	13	0
612	UPS7B1	Klebsiella pneumoniae	IR	R	25mm S	R	R	R	12mm I	R	28mm S	R	22mm S	R	R	R	R	R	R	15mm S	R	R	R	R	R	S(29mm)	R	S(24mm)	R(14mm)	R(16mm)	R(13mm)	R	R	R(13mm)	26	6	0
613	UPS7B2	Escherichia coli	R	R	15mm I	R	13mm I	R	R	R	25mm S	R	31mm S	15mm I	R	14mm I	R	R	15mm I	18mm S	R	14mm R	23mm S	R	S(23mm)	S(34mm)	S(22mm)	S(31mm)	S(30mm)	S(32mm)	S(26mm)	S(30mm)	S(29mm)	S(27mm)	18	14	0
614	UPS8B1	Proteus penneri	IR	15mm S	22mm S	R	IR	R	R	R	20mm R	R	R	15mm I	R	15mm I	R	R	IR	20mm S	20mm S	14mm R	R	IR	R (16mm) (I)	S (36mm)	R	S (31mm)	S (23mm)	S (25mm)	S (22mm)	R (17mm)	R (16mm)	S (21mm)	22	10	0
615	UPS9B1	Klebsiella pneumoniae	IR	12mm I	R	R	12mm I	R	R	R	18mm R	R	R	18mm S	R	11mm R	R	R	16mm I	14mm S	R	16mm I	R	R	R (13mm)	S (29mm)	R	S (26mm)	R (15mm)	R (20mm) (I)	R (18mm) (I)	R (15mm)	R (12mm)	R (13mm)	28	4	0
616	UPS9B2	Escherichia coli	R	R	26mm S	R	15mm I	R	R	R	15mm R	R	32mm S	16mm I	R	16mm S	R	R	16mm I	24mm S	R	20mm S	R	R	R(14mm)	S(35mm)	R	S(29mm)	S(25mm)	S(26mm)	S(25mm)	R(15mm)	R(12mm)	S(25mm)	21	11	0
617	UPS9B4	Klebsiella pneumoniae	IR	R	25mm S	14mm R	12mm I	R	R	R	R	18mm S	23mm S	19mm S	R	16mm S	R	R	R	R	R	R	R	18mm S	S(23mm)	S(28mm)	R(18mm)	S(26mm)	S(26mm)	S(31mm)	S(21mm)	R(24mm)	S(25mm)	S(23mm)	18	14	0
618	UPS10B1	Escherichia coli	R	17mm S	28mm S	R	12mmI	R	R	R	16mm R	17mm S	32mm S	17mm S	R	16mm S	13mm R	R	17mm I	22mm S	28mm S	14mm R	R	R	R (15mm)	S (35mm)	R	S (28mm)	S (21mm)	R (23mm) (I)	S (23mm)	R (17mm)	R (13mm)	R (18mm) (I)	20	12	0
619	UPS10B2	Klebsiella pneumoniae	IR	R	20mm S	R	10mm R	R	R	R	R	R	18mm R	R	R	10mm R	R	R	15mm I	15mm S	R	21mm S	R	R	R (12mm)	S (34mm)	R	S (29mm)	R (18mm) (I)	R (22mm) (I)	R (17mm)	R (17mm)	R (13mm)	R (15mm)	27	5	0
620	UKS3B1	Escherichia coli	R	13mm S	R	R	12mm I	R	R	R	19mm R	16mm S	31mm S	R	R	16mm S	R	R	15mm I	15mm S	R	22mm S	R	R	R(10mm)	S(27mm)	R	R(19mm)	R (15mm)	R(17mm)	R(15mm)	R(11mm)	R	R(14mm)	25	7	0
621	UKS3B2	Escherichia coli	R	R	21mm S	R	11mm R	R	R	R	21mm I	15mm S	28mm S	15mm I	R	14mm I	R	R	14mm I	17mm S	R	15mm I	R	R	S(24mm)	S(28mm)	R(19mm)	S(26mm)	S(32mm)	S(33mm)	S(23mm)	S(26mm)	S(27mm)	S(24mm)	19	13	0
622	UKS3B3	Escherichia coli	R	R	19mm S	R	10mm R	R	R	R	20mm R	15mm S	30mm S	15mm I	R	14mm I	R	R	15mm I	17mm S	R	12mm R	R	R	R(13mm)	S(32mm)	R	S(28mm)	R(20mm)	R(20mm)	R(19mm)	R(14mm)	R(11mm)	R(15mm)	26	6	0
623	UKS2B1	Enterobacter hormaechei	R	R	12mm R	R	12mm I	R	R	R	22mm I	R	20mm R	R	R	10mm R	R	R	16mm I	14mm S	R	21mm S	16mm S	R	R(10mm)	S (29mm)	R	R(16mm)	R (13mm)	R(16mm)	R(15mm)	R(11mm)	R	R (13mm)	28	4	0
624	UKS2B2	Klebsiella pneumoniae	IR	R	22mm S	R	11mm R	R	R	R	R	R	R	R	R	10mm R	R	R	16mm I	14mm S	R	23mm S	14mm I	R	R	S(30mm)	R	S(25mm)	R(14mm)	R(18mm)	R(15mm)	R(12mm)	R	R(13mm)	27	5	0
625	UKS2B3	Klebsiella pneumoniae	IR	12mm I	R	R	R	R	R	R	16mm R	R	R	R	R	15mm I	R	R	R	R	R	19mm S	R	R	R(18mm)	S(27mm)	R(13mm)	S (23mm)	R	S (25mm)	R(18mm)	R(23mm)	S(26mm)	S (21mm)	26	6	0
626	UKS1B1	Escherichia coli	R	R	R	R	12mm I	R	R	R	21mm I	15mm S	R	R	R	15mm I	R	R	12mm R	17mm S	R	17mm I	18mm S	R	R (13mm)	S (34mm)	R	S (29mm)	R (20mm) (I)	R (20mm) (I)	R (20mm) (I)	R (15mm)	R (12mm)	R (14mm)	27	5	0
627	UKS1B2	Klebsiella pneumoniae	IR	10mm R	10mm R	R	14mm I	R	R	R	22mm I	R	31mm S	R	R	10mm R	R	R	16mm I	R	R	R	R	R	R(10mm)	S(31mm)	R	S(28mm)	R(16mm)	R(21mm)	R(16mm)	R(12mm)	R	R(16mm) (I)	29	3	0
Sr.no.	SAMPLE	Bacterial species	Ampicillin (10µg)	Azithromycin (15µg)	Chlorampheniol (30µg)	Carbenicillin (100µg)	Colistin sulfate(10µg)	Ciprofloxacin(5µg)	Doxycycline(30µg)	Furazolidon (50µg)	Gentamycin10µg)	Imipenem (10µg)	Kanamycin (30µg)	Nalidixic acid(30µg)	Neomycin (30µg)	Norfloxacin (10µg)	Polymyxin B (300 IU)	Rifampicin (30µg)	Streptomycin (10µg)	Spectinomycin (100µg)	Trimethoprim/Sulfamethoxazole (25µg)	Tetracyclin (30µg)	Cefoperazone (75 µg)	Meropenem (10 µg)	Cefpodoxime (10 µg)	Ertapenem (10 µg)	Aztreonam (30 µg)	Cefepime (30 µg)	Ceftazidime (30 µg)	Cefotaxime (30 µg)	Ceftriaxone (30 µg)	Cefixime (5µg)	Vancomycin(5mcg)	Erythromycin(15mcg)	Total no. of Resistance	Susceptible	Undetermined
1	C15S2AB1	Proteus mirabilis	R	R	28mm S	25mm S	IR	R	R	16mm R	R	32mm S	R	R	R	R	IR	11mm S	R	R	R	IR	R	S (30mm)	R	S (23mm)	R	S (25mm)	R	R (25mm) (I)	S (30mm)	R	ND	ND	22	8	0
2	C15S9AB1	Proteus mirabilis	R	R	38mm S	21mm I	IR	18mm R	27mm S	27mm S	R	31mm S	R	R	R	16mm S	IR	R	R	R	R	IR	R (11mm)	R (16mm)	R	R (18mm)	R (13mm)	R (14mm)	R	R (10mm)	R	R (17mm) (I)	ND	ND	25	5	0
3	CG1S1AB1	Aeromonas caviae	R	R	R	R	R	R	R	15mmR	R	R	10mmR	R	R	R	R	12mm S	R	25mm S	R	R	R	S (35mm)	R	S (27mm)	R	R	R	R	R	R	ND	ND	26	4	0
4	C45S2AB3	Citrobacter werkmanii	R	R	24mm S	R	13mm R	12mm R	14mm S	19mm R	R	25mm S	R	R	R	R	17mm I	17mmS	R	R	R	R	R (17mm) (I)	S (27mm)	S (22mm)	S (30mm)	R	R (18mm)	S (21mm)	S (28mm)	R	S(21mm)	ND	ND	20	10	0
5	C45S3AB3	Proteus mirabilis	R	R	8mm R	14mm R	IR	20mm R	12mm I	10mm R	8mm R	21mm I	R	R	12mm R	17mm S	IR	16mmS	R	R	R	IR	R (16mm) (I)	S (25mm)	R	S (23mm)	R (17mm)	R (15mm)	R	R (16mm)	R	R (14mm)	ND	ND	26	4	0
6	C45S6AB2	Proteus mirabilis	R	R	16mm I	30mm S	IR	R	14mm S	25mm S	R	21mm I	R	R	R	18mm S	IR	31mmS	R	R	R	IR	R (18mm) (I)	S (28mm)	R (11mm)	S (26mm)	S (27mm)	S (31mm)	S (21mm)	S (26mm)	S (30mm)	S (24mm)	ND	ND	17	13	0
7	UP1S4AB1	Proteus mirabilis	R	R	19mm S	22mm S	IR	R	20mm S	23mm I	R	33mm S	R	R	R	R	IR	28mm S	R	R	R	IR	R	S (27mm)	R	S (27mm)	R	R	R	R	R	R (17mm) (I)	ND	ND	23	7	0
8	UP1S3AB1	Proteus mirabilis	R	R	16mm I	12mm R	IR	R	13mm S	12mm R	10mm R	17mm R	R	R	8mm R	14mm I	IR	18mmS	R	R	R	IR	R (15mm)	S (21mm)	R	S (21mm)	S (22mm)	R (15mm)	R (11mm)	R (15mm)	R (15mm)	R (18mm) (I)	ND	ND	25	5	0
9	C42S2AB1_1	Proteus mirabilis	R	R	R	R	IR	R	10mm R	R	10mm R	R	R	R	12mm R	R	IR	17mm S	R	R	R	IR	R	R	R	R	R	R	R	R	R	R	ND	ND	29	1	0
10	C42S2AB1_2	Proteus mirabilis	R	R	R	R	IR	R	10mm R	R	10mm R	R	R	R	12mm R	R	IR	17mm S	R	R	R	IR	R	R	R	R	R	R	R	R	R	R	ND	ND	29	1	0
11	CG2S1AB1	Enterococcus faecium	R	R	22mm S	R	R	R	16mm S	R	R	R	R	R	R	R	R	R	R	14mm R	IR	13mm I	R	R	R	R	R	R	R	R	R	R	R	R	30	2	0
12	C37S1AB1	Proteus mirabilis	R	R	R	13mm R	IR	R	R	R	R	19mm R	R	R	R	11mm R	IR	R	R	12mmR	R	IR	S (27mm)	S (27mm)	S (27mm)	S (25mm)	S (33mm)	S (26mm)	S (27mm)	S (35mm)	S (37mm)	S (20mm)	ND	ND	20	10	0
13	DEHRA_AB1	Escherichia coli	R	R	21mm S	R	10mm R	R	14mm S	11mm R	10mm R	20mm R	R	R	11mm R	R	12mmR	R	R	11mmR	R	R	R	S (31mm)	R	S (24mm)	R	R	R	R	R	R	ND	ND	26	4	0
14	CG3S4AB1	Escherichia coli	R	R	R	R	10mm R	13mm R	R	15mm R	R	R	R	R	R	14mm I	12mmR	R	R	12mmR	R	R	R	S (31mm0	R	S (31mm)	R (15mm)	R (15mm)	R (15mm)	R (10mm)	R	R (15mm)	ND	ND	28	2	0
15	C35S2AB1	Klebsiella pneumoniae	R	R	R	R	11mm R	R	12mm I	R	11mm R	14mm R	R	R	R	R	12mmR	R	R	12mmR	R	R	R	R (18mm)	R	R (13mm)	R	R (10mm)	R	R	R	R	ND	ND	30	0	0
16	C41S6AB1	Escherichia coli	R	R	22mm S	R	10mm R	R	13mm S	12mm R	R	16mm R	R	R	10mm R	R	13mmR	13mm S	R	11mmR	R	11mm R	R	R (21mm) (I)	R	R (14mm)	R (11mm)	R (15mm)	R	R	R	R	ND	ND	27	3	0
17	C49S6AB1	Escherichia coli	R	R	17mm S	R	10mm R	R	12mm I	18mm R	8mm R	R	8mm R	R	8mm R	R	11mmR	R	R	14mmR	R	R	R (15mm)	S (28mm)	R	R(17mm)	S (22mm)	S (29mm)	R (12mm)	R (20mm)	R (19mm)	R	ND	ND	26	4	0
18	KOL-1AB1(3)	Aeromonas veronii	R	R	23mm S	R	12mm R	19mm R	21mm S	20mm R	8mm R	32mm S	R	23mm S	10mm R	18mm S	15mm I	18mmS	R	12mmR	R	14mm S	R (20mm) (I)	S (37mm0	R (20mm) (I)	S (29mm)	S (34mm)	S (31mm)	S (29mm)	S (27mm)	R (18mm)	S (32mm)	ND	ND	16	14	0
19	RISHI_AB1	Proteus vulgaris	IR	R	31mm S	23mm S	IR	18mm R	18mm S	16mm R	8mm R	17mm R	8mm R	R	10mm R	18mm S	IR	R	R	R	R	IR	S (26mm)	S (32mm)	S (29mm)	S (30mm)	S (26mm)	S (28mm)	S (21mm)	S (27mm)	S (26mm)	S (26mm)	ND	ND	15	15	0
20	C26S5AB1	Enterococcus faecium	R	R	12mm R	R	R	R	11mm R	R	R	R	R	R	R	R	R	R	R	11mmR	IR	12mm R	R	R	R	R	R	R	R	R	R	R	S (17mm)	R	31	1	0
21	C25S4AB2	Enterococcus faecium	R	R	15mm I	R	R	R	11mm R	R	9mm R	R	R	R	11mm R	R	R	20mm S	R	R	IR	13mm I	R	R	R	R	R	R	R	R	R	R	S (21mm)	R	30	2	0
22	C25S2AB2	Enterococcus faecium	R	R	11mm R	R	R	R	14mm S	R	R	R	R	R	R	R	R	R	R	13mmR	IR	14mm S	R	R	R	R	R	R	R	R	R	R	S(25mm)	R	29	3	0
23	C25S1AB1	Enterococcus raffinosus	10mm R	R	25mm S	R	R	R	20mm S	15mm R	R	R	R	R	R	R	10mm	R	R	12mmR	20mm S	17mm S	S (31mm)	R	R	R	R	R	R	R(12mm)	R(13mm)	R	ND	ND	24	6	1
24	C16S1AB1	Enterococcus faecium	R	R	19mm S	R	R	R	12mm I	R	9mm R	R	R	R	R	R	R	15mmR	R	R	IR	12mm R	R	R	R	R	R	R	R	R	R	R	S (20mm)	R	30	2	0
25	CG3S6AB1	Enterococcus faecium	R	R	R	R	R	R	R	R	R	R	R	R	R	R	R	R	R	13mm R	IR	14mm S	R	R	R	R	R	R	R	R	R	R	S (24mm)	R	30	2	0
26	UP1S5AB2	Citrobacter werkmanii	R	R	17mm S	R	10mm R	R	12mm I	R	10mm R	22mm S	R	R	11mm R	R	11mmR	R	R	R	14mm I	R	R (20mm) (I)	S (28mm)	R (17mm)	S (27mm)	S (28mm)	R (23mm) (I)	R (18mm) (I)	R (23mm) (I)	S (28mm)	R (18mm) (I)	ND	ND	24	6	0
27	C41S1AB2	Citrobacter spp	R	R	R	R	R	R	R	17mm R	R	R	13mm R	R	R	R	15mmI	12mmS	R	R	R	R	R (10mm)	S (28mm)	R	S (25mm)	S (21mm)	S (30mm)	R	R (12mm)	R (11mm)	R	ND	ND	25	5	0
28	UP1S6AB2	Morganella morganii	IR	R	22mm S	R	IR	R	15mm S	R	10mm R	16mm R	R	R	11mm R	R	IR	R	R	R	R	R	S (21mm0	S (26mm)	R (17mm)	S (22mm)	S (26mm)	R (24mm) (I)	R (19mm) (I)	S (28mm)	S (25mm)	S (22mm)	ND	ND	21	9	0
29	C26S2AB1	Enterococcus faecium	R	R	R	R	R	R	R	R	R	R	R	R	R	R	R	R	R	13mm R	IR	11mm R	R	R	R	R	R	R	R	R	R	R	S (20mm)	R	31	1	0
30	DEHRA_AB2	Citrobacter werkmanii	R	R	R	10mm R	R	16mm R	R	24mm I	R	R	13mm R	R	R	15mm I	15mmI	15mmS	R	R	10mm R	11mm R	S (29mm)	S (31mm)	S (23mm)	S (33mm)	S (22mm)	S (33mm)	S 927mm)	S (33mm)	S (29mm)	S (25mm)	ND	ND	19	11	0
31	C26S7AB1	Enterococcus faecium	R	R	18mm S	R	R	R	14mm S	R	R	R	R	R	R	R	R	R	R	10mm R	IR	R	R	R	R	R	R	R	R	R	R	R	S (20mm)	R	29	3	0
32	JHS3AB2	Enterococcus faecium	R	R	22mm S	R	R	R	13mm S	R	R	R	R	R	11mm R	R	R	25mmS	R	R	IR	14mm S	R	R	R	R	R	R	R	R	R	R	S (22mm)	R	27	5	0
33	HARI_AB1	Citrobacter werkmanii	R	R	R	R	13mm R	16mm R	16mm S	23mm I	R	25mm S	12mm R	R	12mm R	18mm S	17mm I	18mmS	R	R	R	14mm S	R (18mm) (I)	S (25mm)	R (16mm)	S (22mm)	S (23mm)	R (17mm)	R (16mm)	R (23mm) (I)	S (23mm)	S (23mm)	ND	ND	20	10	0
34	C10S5AB1	Morganella morganii	IR	R	R	R	IR	15mm R	R	10mm R	R	15mm R	10mm R	R	10mm R	R	IR	14mmS	R	10mm R	R	20mm S	S (25mm)	S (24mm)	R (20mm) (I)	S (24mm)	R	R	R	S (35mm)	S (34mm)	S (24mm)	ND	ND	22	8	0
35	C11S4AB1	Enterococcus faecium	R	R	R	R	R	R	10mm R	R	R	R	R	R	R	R	R	17mmI	R	R	IR	R	R	R	R	R	R	R	R	R	R	R	S (19mm)	R	31	1	0
36	C11S3AB1	Enterococcus faecium	R	R	R	R	R	10mmR	13mm S	R	R	R	R	R	R	12mm R	R	20mmS	R	R	IR	14mmS	R	R	R	R	R	R	R	R	R	R	S (26mm)	R	28	4	0
37	C10S6AB2	Enterococcus faecium	R	R	R	23mm S	R	15mm R	10mm R	18mmR	R	20mm R	R	R	10mm R	15mm I	R	15mmR	R	10mm R	IR	20mm S	R	R	R	R	R	R	R	R	R	R	S (24mm)	R	29	3	0
38	C11S5AB1	Enterococcus faecium	R	R	R	R	R	R	13mm S	R	R	R	R	R	R	R	R	R	R	13mm R	IR	12mm R	R	R	R	R	R	R	R	R	R	R	S (24mm)	R	30	2	0
39	C10S7AB1	Morganella morganii	IR	R	R	22mm S	IR	15mm R	12mm I	15mm R	R	17mm R	10mm R	R	10mm R	15mm I	IR	15mm S	R	11mm R	R	20mm S	R	R	R	R	S (21mm)	R	R (19mm) (I)	R	R (21mm); (I)	S (26mm)	ND	ND	25	5	0
40	C11S2AB1	Morganella morganii	IR	R	R	R	IR	R	R	15mm R	R	20mm R	10mm R	R	10mm R	R	IR	12mmS	R	R	R	12mm R	R	R	R	R	R	R	R	R	R	R (15mm)	ND	ND	29	1	0
41	C10S7AB2	Enterococcus faecium	R	R	R	22mm S	10mm	15mm R	12mm I	15mmR	R	17mm R	10mm R	R	10mm R	15mm I	R	15mmR	R	11mm R	IR	20mm S	R	R	R	R	R	R	R	R	R	R	S (25mm)	R	29	3	1
42	C10S1AB2	Enterococcus faecium	R	10mm R	R	17mm R	R	20mm R	15mm S	17mmR	R	15mmR	10mm R	R	10mm R	17mm S	R	15mmR	R	R	IR	15mm S	R	R	R	R	R	R	R	R	R	R	S(21mm)	R	28	4	0
43	C10S2AB1	Enterococcus faecium	R	R	R	R	R	R	10mm R	R	R	R	R	R	10mm R	R	R	19mmI	R	R	IR	12mm R	R	R	R	R	R	R	R	R	R	R	R	R	32	0	0
44	C11S6AB2	Proteus mirabilis	R	R	R	R	IR	R	10mm R	R	R	R	R	R	11mm R	R	IR	R	R	11mm R	R	IR	R	R	R	R	R	R	R	R	R	R (14mm)	ND	ND	30	0	0
45	C14S6AB1	Morganella morganii	IR	R	R	R	IR	19mm R	R	15mm R	R	20mm R	15mm I	R	13mm R	16mm S	IR	16mmS	R	R	R	25mm S	R	S (25mm)	S (25mm)	S (28mm)	R	S (30mm)	S (27mm)	S (28mm)	S (28mm)	S (31mm)	ND	ND	19	11	0
46	C14S7AB2	Enterococcus faecium	R	R	R	22mm S	R	15mm R	14mm S	R	R	R	R	R	R	14mm I	R	31mmS	R	R	IR	14mm S	R	R	R	R	R	R	R	R	R	R	S (20mm)	R	27	5	0
47	C12S1AB1	Enterococcus faecium	R	R	R	R	R	R	14mm S	R	R	R	R	R	12mm R	R	R	R	R	R	IR	15mm S	R	R	R	R	R	R	R	R	R	R	S (21mm)	R	29	3	0
48	C12S2AB1	Morganella morganii	IR	R	R	R	IR	R	R	15mm R	R	23mm S	14mm R	R	15mm R	18mm S	IR	19mmS	R	R	R	20mm S	R	R	R	R	R	R	R	R	R	S (20mm)	ND	ND	25	5	0
49	C12S3AB1	Enterococcus faecium	R	R	R	R	R	R	14mm S	R	R	R	R	R	R	R	R	16mmR	R	R	IR	15mm S	R	R	R	R	R	R	R	R	R	R	R	R	30	2	0
50	C12S4AB1_1	Morganella morganii	IR	R	R	29mm S	IR	16mm R	R	17mm R	R	19mm R	15mm I	R	13mm R	15mm I	IR	18mmS	10mm R	R	R	23mm S	S(24mm)	S (24mm)	R	R	S (26mm)	R	S (22mm)	S (27mm)	S (30mm)	S (24mm)	ND	ND	20	11	0
51	C12S4AB1_2	Morganella morganii	IR	R	R	29mm S	IR	16mm R	R	17mm R	R	19mm R	15mm I	R	13mm R	15mm I	IR	18mmS	10mm R	R	R	23mm S	S(24mm)	S (24mm)	R	R	S (26mm)	R	S (22mm)	S (27mm)	S (30mm)	S (24mm)	ND	ND	20	11	0
52	C12S4AB2	Enterococcus faecium	R	R	R	30mm S	R	15mm R	R	13mmR	R	20mm R	13mm R	R	11mm R	14mm I	R	20mmR	10mm R	R	IR	25mm S	R	R	R	R	R	R	R	R	R	R	S (26mm)	R	29	3	0
53	C14S1AB1	Morganella morganii	IR	R	R	R	IR	R	15mm S	R	R	20mm R	R	R	13mm R	R	IR	17mmI	R	R	R	15mm S	S (19mm)	S (25mm)	R	R	R	R	S (22mm)	S (26mm)	S (29mm)	S (25mm)	ND	ND	22	8	0
54	GUW S5 AB2	Enterobacter cloacae	IR	20mm S	26mm S	R	R	30mm S	18mm S	10mm R	16mm S	18mm R	20mm S	20mm S	R	28mm S	11mm R	15mmS	18mm S	20mm S	25mm S	22mm S	S (18mm)	S (25mm)	R	S (23mm)	S (22mm)	S (30mm)	S (22mm)	R	R (15mm)	S (22mm)	ND	ND	10	20	0

## Sheet: S5c
Screening of Vancomycin-resistant Enterococcus isolates
Sl. no.	Sample ID	Identified Organism	Vancomycin (5mcg)	Erythromycin (15mcg)	Resistant	Sensitive
1	C10S1AB2	Enterococcus faecium	S(21mm)	R	1	1
2	C10S2AB1	Enterococcus faecium	R	R	2	1
3	C10S5AB2	Enterococcus faecium	S (23mm)	R	1	1
4	C10S6AB2	Enterococcus faecium	S (24mm)	R	1	1
5	C10S7AB2	Enterococcus faecium	S (25mm)	R	1	1
6	C11S1AB1	Enterococcus faecium	S (22mm)	R	1	1
7	C11S2AB1	Enterococcus faecium	R	R	2	0
8	C11S3AB1	Enterococcus faecium	S (26mm)	R	1	1
9	C11S4AB1	Enterococcus faecium	S (19mm)	R	1	1
10	C11S5AB1	Enterococcus faecium	S (24mm)	R	1	1
11	C11S6AB1	Enterococcus faecium	R	R	2	0
12	C11S7AB1	Enterococcus faecium	R	R	2	0
13	C12S1AB1	Enterococcus faecium	S (21mm)	R	1	1
14	C12S3AB1	Enterococcus faecium	R	R	2	0
15	C12S4AB2	Enterococcus faecium	S (26mm)	R	1	1
16	C13S2AB1	Enterococcus faecium	S (21mm)	R	1	1
17	C13S5AB1	Enterococcus faecium	S (25mm)	R	1	1
18	C14S1AB1	Enterococcus faecium	S(24mm)	R	1	1
19	C14S2AB1	Enterococcus faecium	S (24mm)	R	1	1
20	C14S4AB1	Enterococcus faecium	R	R (10mm)	2	0
21	C14S5AB1	Enterococcus faecium	S (25mm)	R	1	1
22	C14S7AB2	Enterococcus faecium	S (20mm)	R	1	1
23	C15S3AB1	Enterococcus faecium	S (24mm)	R (10mm)	1	1
24	C15S8AB1	Enterococcus faecium	S (17mm)	R	1	1
25	C16S1AB1	Enterococcus faecium	S (20mm)	R	1	1
26	C16S1AB2	Enterococcus faecium	R	R	2	0
27	C16S6AB1	Enterococcus faecium	S (25mm)	R (10mm)	1	1
28	C17S1AB1	Enterococcus faecium	S (24mm)	R	1	1
29	C17S2AB1	Enterococcus faecium	R (11mm)	R	2	0
30	C18S1AB2	Enterococcus faecium	S (24mm)	R	1	1
31	C18S5AB1	Enterococcus faecium	S (26mm)	R	1	1
32	C18S6AB2	Enterococcus faecium	S (17mm)	R (10mm)	1	1
33	C19S1AB1	Enterococcus faecium	S (24mm)	R (10mm)	1	1
34	C19S2AB1	Enterococcus faecium	S (20mm)	R	1	1
35	C19S3AB1	Enterococcus faecium	S (20mm)	R	1	1
36	C19S5AB1	Enterococcus faecium	S (22mm)	R	1	1
37	C19S6AB1	Enterococcus faecium	S (22mm)	R	1	1
38	C19S7AB1	Enterococcus faecium	S (21mm)	R (11mm)	1	1
39	C20S3AB2	Enterococcus faecium	S (24mm)	R	1	1
40	C20S4AB1	Enterococcus faecium	S (23mm)	R (10mm)	1	1
41	C20S5AB2	Enterococcus faecium	S (24mm)	R	1	1
42	C20S6AB2	Enterococcus faecium	S (14mm)	R	1	1
43	C22S1AB1	Enterococcus faecium	S (19mm)	R (10mm)	1	1
44	C22S2AB1	Enterococcus faecium	S(25mm)	R	1	1
45	C22S3AB1	Enterococcus faecium	S (24mm)	R	1	1
46	C22S5AB1	Enterococcus faecium	R(6mm)	R	2	0
47	C22S6AB1	Enterococcus faecium	S(26mm)	R	1	1
48	C22S6AB2	Enterococcus faecium	R(10mm)	R	2	0
49	C23S3AB1	Enterococcus faecium	S(25mm)	R	1	1
50	C23S4AB1	Enterococcus faecium	S(20mm)	R	1	1
51	C23S4AB2	Enterococcus faecium	S(27mm)	R	1	1
52	C23S5AB1	Enterococcus faecium	S(21mm)	R	1	1
53	C23S6AB1	Enterococcus faecium	S (20mm)	R	1	1
54	C24S7AB1	Enterococcus faecium	R	R	2	0
55	C25S2AB1	Enterococcus faecium	R	R	2	0
56	C25S2AB2	Enterococcus faecium	S(25mm)	R	1	1
57	C25S4AB1	Enterococcus faecium	S(20mm)	R	1	1
58	C25S4AB2	Enterococcus faecium	S (21mm)	R	1	1
59	C25S5AB1	Enterococcus faecium	S(19mm)	R	1	1
60	C26S1AB1	Enterococcus faecium	S(20mm)	R	2	0
61	C26S2AB1	Enterococcus faecium	S (20mm)	R	1	1
62	C26S2AB2	Enterococcus faecium	S(19mm)	R	1	1
63	C26S3AB1	Enterococcus faecium	S(20mm)	R	1	1
64	C26S4AB1	Enterococcus faecium	S(21mm)	R	1	1
65	C26S5AB1	Enterococcus faecium	S (17mm)	R	1	1
66	C26S6AB2	Enterococcus faecium	S (23mm)	R	1	1
67	C26S7AB1	Enterococcus faecium	S (20mm)	R	1	1
68	C27S7AB1	Enterococcus faecium	R	R	2	0
69	C27S7AB2	Enterococcus faecium	S(20mm)	R	1	1
70	C28S2AB1	Enterococcus faecium	S(20mm)	R	1	1
71	C28S5AB3	Enterococcus faecium	S(25mm)	R	1	1
72	C28S6AB1	Enterococcus faecium	S(21mm)	R	1	1
73	C28S6AB2	Enterococcus faecium	S(24mm)	R	1	1
74	C28S6AB3	Enterococcus faecium	R	R	2	0
75	C29S7AB1	Enterococcus faecium	S(26mm)	R	1	1
76	C30S1AB1	Enterococcus faecium	S(26mm)	R	1	1
77	C30S2AB1	Enterococcus faecium	S(27mm)	R	1	1
78	C30S3AB1	Enterococcus faecium	S(22mm)	R	1	1
79	C30S4AB2	Enterococcus faecium	S(19mm)	R	1	1
80	C30S5AB2	Enterococcus faecium	S (23mm)	R	1	1
81	C30S6AB1	Enterococcus faecium	S (20mm)	R	1	1
82	C30S6AB2	Enterococcus faecium	S (22mm)	R	1	1
83	C30S7AB2	Enterococcus faecium	S (22mm)	R	1	1
84	C31S3AB1	Enterococcus faecium	S (22mm)	R	1	1
85	C31S6AB1	Enterococcus faecium	S (21mm)	R	1	1
86	C34S5AB1	Enterococcus faecium	S (22mm)	R	1	1
87	C35S5AB1	Enterococcus faecium	R	R	2	0
88	C35S6AB1	Enterococcus faecium	S (21mm)	R	1	1
89	C35S7AB1	Enterococcus faecium	R	R	2	0
90	C37S5AB1	Enterococcus faecium	S (21mm)	R	1	1
91	C37S7AB1	Enterococcus faecium	S(22mm)	R	1	1
92	C39S4AB1	Enterococcus faecium	S (23mm)	R	1	1
93	C39S5AB1	Enterococcus faecium	R	R	2	0
94	C39S6AB2	Enterococcus faecium	S (19mm)	R	1	1
95	C40S1AB1	Enterococcus faecium	S (19mm)	R	1	1
96	C40S6AB1	Enterococcus faecium	S (20mm)	R	1	1
97	C40S7AB1	Enterococcus faecium	S (19mm)	R	1	1
98	C42S3AB1	Enterococcus faecium	R	R	2	0
99	C42S4AB1	Enterococcus faecium	R	R	2	0
100	C42S6AB1	Enterococcus faecium	S (20mm)	R	1	1
101	C42S7AB1	Enterococcus faecium	R	R	2	0
102	C43S3AB1	Enterococcus faecium	S (23mm)	R	1	1
103	C45S1AB2	Enterococcus faecium	S (20mm)	R	1	1
104	C45S1AB3	Enterococcus faecium	R	R	2	0
105	C45S3AB2	Enterococcus faecium	S (20mm)	R	1	1
106	C45S4AB1	Enterococcus faecium	S (20mm)	R	1	1
107	C45S5AB3	Enterococcus faecium	S (21mm)	R	1	1
108	C45S7AB2	Enterococcus faecium	S (22mm)	R	1	1
109	C47S1AB2	Enterococcus faecium	S (18mm)	R	1	1
110	C47S2AB2	Enterococcus faecium	S (19mm)	R	1	1
111	C48S1AB2	Enterococcus faecium	S (19mm)	R	1	1
112	C48S2AB1	Enterococcus faecium	S (20mm)	R	1	1
113	C48S4AB2	Enterococcus faecium	S (20mm)	R	1	1
114	C48S6AB2	Enterococcus faecium	S (19mm)	R	1	1
115	C49S1AB1	Enterococcus faecium	S (19mm)	R	1	1
116	C49S2AB1	Enterococcus faecium	S (21mm)	R	1	1
117	C49S3AB1	Enterococcus faecium	R	R	2	0
118	C49S4AB1	Enterococcus faecium	S (19mm)	R	1	1
119	C49S5AB2	Enterococcus faecium	S (20mm)	R	1	1
120	C49S7AB1	Enterococcus faecium	S (20mm)	R	1	1
121	C50S3AB1	Enterococcus faecium	S (19mm)	R	1	1
122	C50S5AB1	Enterococcus faecium	S (19mm)	R	1	1
123	C50S7AB1	Enterococcus faecium	S (18mm)	R	1	1
124	CG2S1AB1	Enterococcus faecium	R	R	2	0
125	CG3S6AB1	Enterococcus faecium	S (24mm)	R	1	1
126	CG3S7AB1	Enterococcus faecium	S (18mm)	R	1	1
127	CG3S8AB2	Enterococcus faecium	S (21mm)	R	1	1
128	UPS3AB2	Enterococcus faecium	S (18mm)	R	1	1
129	UPS7AB1	Enterococcus faecium	S (17mm)	R	1	1
130	UPS8AB2	Enterococcus faecium	S (18mm)	R	1	1
131	UPS9AB1	Enterococcus faecium	R	R	2	0
132	JH1S1AB2	Enterococcus faecium	S (19mm)	R	1	1
133	JH1S2AB1	Enterococcus faecium	S (21mm)	R	1	1
134	JHS3AB2	Enterococcus faecium	S (22mm)	R	1	1
135	JH1S4AB2	Enterococcus faecium	S (20mm)	R	1	1
136	JH1S5AB2	Enterococcus faecium	R(16mm)	R	2	0
137	JH1S9AB1	Enterococcus faecium	S (19mm)	R	1	1
138	JH1S10AB1	Enterococcus faecium	R	R	2	0
