# Supplementary material for: Antibiotic Contamination and AMR Dynamics in the Urban Sewage Microbiome: Insights from a Longitudinal surveillance
Source: Research Square preprint supplement (doi:10.21203/rs.3.rs-6137541/v1), 2025-03-12
Supplement: Supplementary file 5 [file 9c929449eb627c7c582ad308.xlsx]

## Sheet: S2
Sl. No.	Sample for Dipstick	Group 1				Group 2				Group 3				Group 4
		NDM	CTX-M	KPC	TEM	cat	aac	sul2	oqxA	OXA	TET	aadA	sul1	ermB	dfrA	qnrS	mphA
1	C1S1	0	1	0	1	1	0	0	0	1	0	0	1	0	0	0	0
2	C1S2	0	0	0	0	0	1	0	0	1	1	0	0	1	0	0	0
3	C1S3	0	0	0	1	0	0	0	0	0	0	0	0	0	0	0	0
4	C1S4	0	0	0	0	1	0	0	0	1	0	1	1	0	1	0	1
5	C1S5	0	0	0	0	0	0	0	0	0	0	0	0	0	0	0	1
6	C6S1	0	0	0	1	1	1	0	0	0	0	0	0	0	1	0	1
7	C6S2	0	0	0	0	0	0	0	0	0	0	0	0	0	0	0	1
8	C6S3	0	0	0	0	1	0	0	0	1	0	0	0	0	0	0	0
9	C6S4	0	1	0	1	0	0	0	0	1	0	1	0	0	1	0	1
10	C6S5	0	0	1	0	0	0	0	0	1	0	0	0	0	0	0	1
11	C10S1	0	0	0	0	0	0	0	0	1	0	0	0	0	0	0	0
12	C10S2	0	0	0	0	0	0	0	0	1	0	0	0	0	0	0	0
13	C10S3	0	0	0	0	1	0	0	0	1	1	0	0	0	0	0	0
14	C10S4	0	0	0	0	1	0	0	0	0	0	0	0	0	0	0	0
15	C10S5	0	0	0	0	0	0	0	0	1	0	0	0	0	0	0	0
16	C10S6	0	0	0	1	0	0	0	0	1	0	0	0	0	0	0	1
17	C10S7	0	0	0	0	0	0	0	0	1	0	0	0	0	0	1	1
18	C14S1	0	1	0	1	0	0	0	0	1	0	0	0	0	0	0	1
19	C14S2	0	0	0	0	0	0	0	0	0	0	0	0	1	0	1	0
20	C14S3	0	1	0	0	0	0	0	0	1	1	1	0	0	0	0	1
21	C14S4	0	0	1	0	0	0	0	0	1	0	1	0	0	0	0	1
22	C14S5	0	1	0	0	0	0	0	0	1	0	0	0	0	0	0	1
23	C14S6	0	0	0	0	0	0	0	0	1	1	1	1	0	1	0	1
24	C18S1	0	1	0	0	0	0	0	0	1	0	0	0	0	0	1	1
25	C18S2	0	0	0	0	0	0	0	0	0	0	0	0	0	0	0	1
26	C18S3	0	1	0	1	1	0	0	0	1	0	0	0	1	0	0	1
27	C18S4	0	0	0	0	0	0	0	0	1	1	0	0	0	0	1	1
28	C18S5	0	0	0	0	0	0	0	0	1	0	0	0	0	0	0	1
29	C18S6	1	1	0	1	0	0	0	0	1	0	0	0	1	0	1	1
30	C18S7	0	0	0	0	0	0	0	0	0	1	0	0	0	0	0	0
31	C21S1	0	0	0	0	0	0	0	1	1	0	0	0	0	0	1	1
32	C21S2	0	1	0	0	0	0	0	0	1	1	0	0	0	0	0	1
33	C21S3	0	1	0	0	0	0	0	0	1	0	0	0	0	0	1	1
34	C21S4	0	0	0	0	0	0	0	0	0	0	0	0	0	0	0	0
35	C21S5	0	1	0	0	0	0	0	0	1	1	0	0	0	0	0	1
36	C21S6	0	0	0	1	1	1	0	0	1	1	0	1	0	0	1	0
37	C21S7	0	0	0	0	0	0	1	0	1	0	0	0	0	0	1	0
38	C25S1	0	1	0	1	1	0	0	0	0	0	0	0	1	0	0	0
39	C25S2	0	0	0	0	0	0	0	0	0	0	0	0	0	0	1	0
40	C25S3	0	0	0	0	0	0	0	0	1	1	0	0	0	0	1	0
41	C25S4	0	1	0	0	0	1	0	1	0	0	0	1	0	0	1	1
42	C25S5	0	0	0	0	0	0	0	0	0	1	0	0	1	0	0	0
43	C25S6	0	0	0	0	0	1	0	1	0	0	0	0	0	0	0	1
44	C25S7	0	0	0	0	0	0	0	0	0	1	0	0	0	0	0	0
45	C29S1	0	0	0	0	1	0	0	0	1	0	0	0	0	0	0	0
46	C29S2	0	0	0	1	0	0	0	0	1	0	0	1	0	0	1	0
47	C29S3	0	0	0	1	0	0	0	1	1	0	0	0	0	0	1	0
48	C29S4	0	0	0	0	0	0	0	0	1	0	0	0	0	0	1	1
49	C29S5	0	1	0	1	1	1	0	0	0	0	0	0	1	1	1	0
50	C29S6	1	0	0	0	0	0	0	0	1	0	0	0	0	0	0	0
51	C29S7	0	1	0	0	1	1	0	0	1	0	0	0	0	0	0	0
52	C33S1	0	0	0	0	0	0	0	0	0	0	0	0	0	0	1	1
53	C33S2	0	0	0	0	0	0	0	1	0	1	0	0	0	0	0	0
54	C33S5	0	0	0	0	0	0	0	0	1	0	0	0	0	0	1	0
55	C33S3	0	0	0	0	0	0	0	0	0	0	0	0	0	0	1	0
56	C33S4	0	1	0	1	1	0	0	0	1	0	0	0	0	1	0	1
57	C33S6	0	0	0	0	0	0	0	0	1	0	1	0	0	0	0	0
58	C33S7	0	0	0	0	0	0	0	0	1	0	0	1	0	0	0	0
59	C37S1	0	0	0	1	0	1	1	0	1	0	0	1	1	1	0	1
60	C37S2	0	1	0	1	1	1	0	0	1	0	1	0	0	0	0	1
61	C37S3	0	1	0	0	0	0	0	1	1	1	1	0	0	0	0	1
62	C37S4	0	0	0	0	0	0	0	0	1	0	0	0	0	0	1	0
63	C37S5	0	1	0	0	0	0	0	1	1	0	0	0	0	0	0	0
64	C37S6	0	0	0	0	0	0	0	0	0	0	0	0	0	0	1	1
65	C37S7	0	0	0	0	0	0	0	0	0	0	0	0	0	0	1	0
66	C41S1	0	0	0	1	1	0	0	0	1	1	0	0	0	1	0	0
67	C41S2	0	0	0	0	0	0	0	0	0	0	0	0	0	0	0	0
68	C41S3	0	1	0	1	1	0	1	1	1	1	0	1	0	0	0	1
69	C41S4	0	0	0	0	0	0	0	0	0	0	0	0	0	0	1	0
70	C41S5	0	0	0	0	0	0	1	0	0	0	0	1	0	0	1	0
71	C41S6	0	0	0	0	0	0	0	0	1	0	1	0	0	0	0	0
72	C41S7	0	0	0	0	0	0	0	0	1	0	0	0	0	1	0	0
73	C50S1	0	0	0	0	0	0	0	0	0	0	0	0	0	0	0	0
74	C50S2	0	0	0	1	0	1	0	0	0	0	0	0	1	0	1	1
75	C50S3	0	1	0	0	0	0	0	0	0	1	0	1	0	0	0	0
76	C50S4	0	0	0	0	0	0	0	1	0	1	0	0	0	0	0	0
77	C50S5	0	0	0	1	0	0	0	1	0	0	0	1	0	1	1	1
78	C50S6	0	0	0	0	1	0	0	0	0	0	0	0	0	0	0	0
79	C50S7	1	0	0	0	0	0	0	0	0	1	0	0	0	1	1	1
80	Kol1S1	0	0	0	0	0	1	0	0	1	0	0	0	1	0	0	1
81	Kol1S2	0	0	0	0	0	0	0	0	0	0	0	0	0	0	1	0
82	Kol1S3	0	0	0	1	0	0	0	0	0	0	0	0	0	0	0	0
83	Kol2S1	0	0	0	1	0	1	0	0	1	1	0	0	0	1	1	0
84	Kol2S2	0	0	0	0	1	0	0	0	0	0	0	0	0	0	0	0
85	Kol2S3	0	0	0	1	0	1	0	0	0	1	0	1	0	0	1	1
86	CG1S1	0	0	0	0	0	0	0	0	1	0	0	0	0	0	0	0
87	CG1S2	0	0	0	0	0	1	0	0	0	0	0	1	0	0	0	0
88	CG1S3	0	0	0	1	0	0	0	0	0	1	0	0	0	0	0	1
89	CG1S4	0	0	0	1	0	0	0	0	0	1	0	0	0	0	0	0
90	CG2S1	0	0	0	0	0	0	0	0	0	0	0	0	0	0	0	0
91	CG2S2	0	0	0	0	0	0	1	0	0	0	0	0	0	0	0	0
92	CG2S3	0	0	0	1	0	1	0	0	0	0	0	0	0	0	0	1
93	CG2S4	0	0	0	0	0	0	1	1	0	1	0	0	0	0	1	1
94	CG3S1	0	0	0	0	0	0	0	0	0	0	0	0	1	1	0	0
95	CG3S2	0	0	0	0	0	1	1	0	0	1	0	1	0	0	0	0
96	CG3S3	0	0	0	1	0	0	0	0	0	0	0	0	0	0	0	0
97	CG3S4	0	0	0	0	0	1	0	0	0	0	0	1	0	1	0	1
98	KOL3S1	0	0	0	0	1	0	0	0	0	0	0	0	0	0	0	0
99	KOL3S2	0	0	0	1	0	0	0	0	0	1	0	0	0	0	0	0
100	KOL3S3	0	0	0	0	0	0	0	0	0	0	0	0	0	0	0	0
	Total	n=3	n=21	n=2	n=28	n=19	n=17	n=7	n=11	n=51	n=26	n=9	n=16	n=11	n=14	n=31	n=42
