# Supplementary material for: Antibiotic Contamination and AMR Dynamics in the Urban Sewage Microbiome: Insights from a Longitudinal surveillance
Source: Research Square preprint supplement (doi:10.21203/rs.3.rs-6137541/v1), 2025-03-12
Supplement: Supplementary file 6 [file b09195ab741055c64a305505.xlsx]

## Sheet: S3
Fastq file name	Sample ID	Input	Filtered	DenoisedF	DenoisedR	Merged	Nonchim
20231230NXQR9516S1817	C21S7	115765	52814	49653	48679	44378	25762
20231230NXQR9516S1816	C21S6	206592	100917	97003	97234	87421	36704
20231230NXQR9516S1857	C33S4	165872	91619	88572	88876	81777	49923
20230206NXQR9816S2153	C43S6	151889	106584	104140	104542	97107	50743
20231230NXQR9516S1801	C18S5	180700	95676	87260	90239	75224	52922
20231230NXQR9516S1825	C25S1	207749	102750	94676	97320	83198	54149
20230206NXQR9816S2146	C41S6	188127	126942	122253	123602	111370	54611
20230206NXQR9816S2222	KOL3S2	151868	109133	101623	103577	88182	55104
20231230NXQR9516S1787	C14S4	221521	115773	111283	112443	101600	55539
20231230NXQR9516S1793	C16S4	184228	105185	100295	101753	87539	55790
20231230NXQR9516S1827	C25S3	224258	110235	99714	102834	82438	56542
20231230NXQR9516S1804	C19S1	203706	110475	104917	106677	94405	56897
20231230NXQR9516S1841	C29S3	198942	111340	105996	107620	94422	57607
20230206NXQR9816S2228	JH1S5	184795	132781	126043	127787	107743	58194
20230206NXQR9816S2186	CG1S3	191865	134895	130204	131164	118888	58313
20231230NXQR9516S1805	C19S2	204402	114624	107897	109905	93051	58482
20231230NXQR9516S1840	C29S2	201593	106951	102081	103050	92315	59191
20231230NXQR9516S1848	C31S3	224656	116009	109660	111525	94449	59449
20230206NXQR9816S2185	CG1S2	196098	141358	136708	137236	128606	59588
20231230NXQR9516S1803	C18S7	211947	115094	110248	111473	101475	59659
20230206NXQR9816S2169	UP1S1	230210	144395	136024	138600	123797	60488
20231230NXQR9516S1795	C16S6	198296	111571	105333	106982	92772	60673
20230206NXQR9816S2149	C43S2	179764	118220	113746	114620	105599	60696
20230206NXQR9816S2208	C49S2	173446	121256	117038	118447	107915	60901
20231230NXQR9516S1792	C16S3	217813	120458	113983	115808	98885	60907
20231230NXQR9516S1829	C25S5	235874	117622	106892	110843	92305	61384
20231230NXQR9516S1823	C23S6	229375	115971	108533	110795	95785	61495
20230206NXQR9816S2166	Kol2S1	159477	119909	113903	114543	105081	61574
20230206NXQR9816S2156	C45S2	170266	116931	112267	113843	103255	61614
20230206NXQR9816S2147	C41S7	177860	125399	121985	122685	115385	61731
20230206NXQR9816S2165	Kol1S3	186779	136310	129220	130645	113674	61818
20231230NXQR9516S1785	C14S2	214942	117305	109570	112086	91465	62296
20231230NXQR9516S1796	C16S7	221673	123879	119757	120416	109846	62976
20230206NXQR9816S2213	C49S7	185304	116879	114066	114747	106846	62983
20230206NXQR9816S2189	CG2S2	197082	138948	134207	135580	120449	62992
20231230NXQR9516S1824	C23S7	217936	103968	98220	99945	89184	63104
20231230NXQR9516S1833	C27S2	231013	123800	110608	114671	92153	63248
20231230NXQR9516S1789	C14S6	231603	125915	118356	120964	102082	63306
20231230NXQR9516S1845	C29S7	208092	117057	114698	115240	109361	63324
20231230NXQR9516S1788	C14S5	236188	123343	115681	118469	99178	63689
20231230NXQR9516S1809	C19S6	207414	117859	112567	114212	100687	64109
20230206NXQR9816S2226	JH1S3	176946	129526	122994	124924	107634	64206
20230206NXQR9816S2212	C49S6	171497	119358	112961	115008	100957	64214
20231230NXQR9516S1849	C31S4	253064	130620	122341	125711	107905	64995
20231230NXQR9516S1800	C18S4	230159	122651	115328	118088	102181	65322
20231230NXQR9516S1843	C29S5	236157	131340	124919	127277	112179	65415
20231230NXQR9516S1769	C8S3	207458	119362	109708	112628	90932	66040
20230206NXQR9816S2150	C43S3	206613	155481	148424	151112	131307	66360
20230206NXQR9816S2230	JH1S7	190406	138563	129223	131151	108879	66361
20230206NXQR9816S2168	Kol2S3	167042	113024	109761	110212	104317	66473
20231230NXQR9516S1832	C27S1	237951	128487	120779	122449	106442	66678
20231230NXQR9516S1782	C12S4	251154	132734	124207	127413	106220	66894
20230206NXQR9816S2210	C49S4	180462	124254	118646	119939	108004	66908
20231230NXQR9516S1828	C25S4	260365	130829	117978	121039	96954	66963
20230206NXQR9816S2142	C41S2	202323	138147	134030	135070	123366	66964
20231230NXQR9516S1811	C21S1	220314	127496	122034	124086	109667	67481
20230206NXQR9816S2233	JH1S10	241553	166522	150696	155673	122499	67573
20231230NXQR9516S1821	C23S4	230381	128403	122253	123530	109946	67837
20231230NXQR9516S1791	C16S2	215655	128213	120518	122190	100873	67984
20230206NXQR9816S2227	JH1S4	219444	160052	151627	153967	132805	68026
20231230NXQR9516S1814	C21S4	260844	141498	134168	135814	120476	68144
20231230NXQR9516S1865	C35S6	223661	124213	117826	119587	107296	68255
20231230NXQR9516S1784	C14S1	231294	121117	112909	115666	98237	68917
20231230NXQR9516S1835	C27S4	249918	133254	124384	126635	109648	69072
20230206NXQR9816S2184	CG1S1	184908	139820	135642	136144	126899	69144
20230206NXQR9816S2174	UP2S5	227091	148068	134193	137320	113315	69215
20230206NXQR9816S2138	C39S5	201602	129063	119840	123471	106080	69847
20230206NXQR9816S2191	CG2S4	207443	152436	146118	148080	129502	70055
20230206NXQR9816S2190	CG2S3	217560	162050	154388	156719	134959	70063
20230206NXQR9816S2217	C50S4	178184	124359	116979	119722	104145	70224
20231230NXQR9516S1786	C14S3	246358	135266	128167	130208	110941	70355
20231230NXQR9516S1859	C33S7	238345	131513	125846	127007	116327	70637
20231230NXQR9516S1826	C25S2	251869	129365	116744	119849	98191	70790
20230206NXQR9816S2155	C45S1	179526	125953	117735	119985	105201	70920
20231230NXQR9516S1783	C12S5	252644	134122	124827	127887	107680	71084
20231230NXQR9516S1863	C35S4	252104	141227	135619	137641	124791	71381
20231230NXQR9516S1808	C19S5	248767	135620	126747	129777	110889	71671
20231230NXQR9516S1842	C29S4	251421	140876	133920	136003	120140	71856
20231230NXQR9516S1813	C21S3	243424	139808	133017	135443	117216	71864
20230206NXQR9816S2171	UP2S2	207915	140568	134092	136202	118246	71920
20231230NXQR9516S1776	C10S5	289482	155928	138512	143087	106439	71920
20230206NXQR9816S2209	C49S3	187226	132646	127418	129063	115759	72567
20231230NXQR9516S1772	C10S5	280752	153486	141067	146217	121004	72732
20231230NXQR9516S1802	C18S6	235255	131598	122162	124942	105574	72846
20231230NXQR9516S1752	C2S1	269295	135924	125362	128812	107409	72975
20231230NXQR9516S1749	C1S3	232026	131738	122752	125267	106983	73004
20231230NXQR9516S1815	C21S5	257540	141524	134847	136852	120295	73114
20230206NXQR9816S2167	Kol2S2	235066	152023	138449	142535	116653	73251
20230206NXQR9816S2160	C45S6	171546	126313	121946	123301	112290	73373
20231230NXQR9516S1810	C19S7	253672	143372	137703	139314	126040	73574
20231230NXQR9516S1864	C35S5	250826	137691	130829	132847	116136	73704
20230206NXQR9816S2194	CG3S3	234322	165081	152291	155950	130984	73742
20231230NXQR9516S1844	C29S6	236776	131218	127072	128039	117905	73929
20231230NXQR9516S1790	C16S1	244221	136083	129074	131474	115142	73932
20231230NXQR9516S1861	C35S2	262035	145195	137461	140042	122435	74146
20230206NXQR9816S2143	C41S3	203715	133448	127420	129703	116142	74243
20230206NXQR9816S2216	C50S3	188044	134558	123477	127469	106622	74417
20230206NXQR9816S2187	CG1S4	210984	148928	143422	143600	132082	74443
20231230NXQR9516S1837	C27S6	253189	139698	128938	131774	110234	74682
20230206NXQR9816S2182	CUK1S3	227501	151871	149184	149704	142954	74697
20230206NXQR9816S2154	C43S7	184726	131312	125452	126724	115469	74962
20230206NXQR9816S2137	C39S4	203769	135558	126688	130352	113866	74990
20230206NXQR9816S2170	UP2S1	227233	145097	132079	137137	115551	75054
20230206NXQR9816S2225	JH1S2	197929	141520	133410	136716	121403	75083
20231230NXQR9516S1753	C2S2	253536	127433	116353	119087	97289	75090
20231230NXQR9516S1856	C33S3	268852	148122	139665	142445	121446	75297
20230206NXQR9816S2205	C47S6	239868	166787	161025	162995	146394	75386
20231230NXQR9516S1822	C23S5	266093	136115	126964	130151	112908	75582
20230206NXQR9816S2136	C39S3	221125	147254	139055	142284	123062	76007
20230206NXQR9816S2199	CG3S8	238721	164703	150451	155408	125792	76043
20231230NXQR9516S1839	C29S1	250833	145756	138397	140768	123274	76075
20231230NXQR9516S1806	C19S3	259189	148349	141539	143185	125206	76215
20231230NXQR9516S1755	C2S4	279279	142145	132579	136098	114590	76260
20230206NXQR9816S2192	CG3S1	232131	169222	156009	161057	132294	76335
20231230NXQR9516S1757	C4S1	258055	132730	122988	125581	105737	76510
20231230NXQR9516S1747	C4S1	244004	139353	130330	132918	112925	76512
20231230NXQR9516S1851	C31S6	279184	145454	135842	138829	117250	76520
20230206NXQR9816S2211	C49S5	204845	146979	140805	142270	129149	76550
20230206NXQR9816S2177	UP2S8	276307	192222	178293	183144	158816	76580
20230206NXQR9816S2198	CG3S7	229177	160941	149048	154190	130231	76599
20231230NXQR9516S1797	C18S1	235137	134307	125144	127988	109895	76614
20231230NXQR9516S1819	C23S2	249977	136773	129430	131164	115235	76648
20230206NXQR9816S2127	C37S1	194409	137981	129854	132894	117073	76725
20230206NXQR9816S2221	KOL3S1	176895	118269	111298	112672	98311	76770
20231230NXQR9516S1750	C1S4	292615	147571	137767	141013	120955	76932
20231230NXQR9516S1807	C19S4	262668	150563	142833	144561	125574	76938
20231230NXQR9516S1765	C6S4	267368	146590	137789	140749	121173	76953
20231230NXQR9516S1798	C18S2	256157	146083	136755	139147	118141	77037
20230206NXQR9816S2206	C47S7	230944	152740	147126	148564	135607	77157
20230206NXQR9816S2132	C37S6	220005	161732	156963	158137	143314	77175
20231230NXQR9516S1781	C12S3	269823	150199	141778	145047	122689	77214
20230206NXQR9816S2193	CG3S2	217247	154786	143536	148630	121843	77344
20231230NXQR9516S1812	C21S2	264014	150739	141605	144562	119612	77346
20230206NXQR9816S2232	JH1S9	229993	168984	156163	160033	131986	77446
20231230NXQR9516S1818	C23S1	253891	144913	138555	140059	125727	77848
20230206NXQR9816S2152	C43S5	218095	150580	141752	144475	127755	77866
20231230NXQR9516S1773	C10S2	282092	158563	147706	151583	127906	77883
20231230NXQR9516S1751	C1S5	269109	135182	124457	128100	108086	77944
20230206NXQR9816S2196	CG3S5	247200	172358	159803	164349	136603	78050
20231230NXQR9516S1820	C23S3	246901	134992	127888	129649	115263	78089
20230206NXQR9816S2128	C37S2	221953	156874	148965	152053	135353	78380
20231230NXQR9516S1799	C18S3	251585	141342	130908	134216	113386	78475
20230206NXQR9816S2231	JH1S8	201851	148172	142997	144734	128386	78685
20231230NXQR9516S1847	C31S2	291379	158852	146640	150647	125979	79095
20231230NXQR9516S1855	C33S5	262618	147189	138381	141488	122221	79203
20230206NXQR9816S2220	C50S7	173062	117085	109893	111901	98374	79231
20230206NXQR9816S2141	C41S1	214164	149379	141097	144537	125947	79402
20231230NXQR9516S1794	C16S5	243526	138988	129592	132585	114362	79484
20230206NXQR9816S2144	C41S4	205388	142437	136775	138373	126121	80015
20231230NXQR9516S1748	C1S2	255807	149752	143466	145005	129513	80193
20231230NXQR9516S1761	C4S5	256752	137990	128524	131370	111933	80390
20231230NXQR9516S1777	C10S6	272369	152898	144533	147977	124531	80421
20231230NXQR9516S1853	C33S1	277931	150739	145705	146957	131070	80525
20230206NXQR9816S2201	C47S2	254950	168831	160753	163616	143660	80646
20230206NXQR9816S2151	C43S4	224496	151469	140991	144935	126901	80716
20230206NXQR9816S2188	CG2S1	197018	149870	146889	147246	135496	80941
20230206NXQR9816S2157	C45S3	192986	142068	133215	136761	118985	81000
20230206NXQR9816S2202	C47S3	221359	152229	144586	147982	131459	81757
20231230NXQR9516S1831	C25S7	253933	136296	130986	131435	117529	82047
20230206NXQR9816S2218	C50S5	188464	131034	121623	124353	107143	82944
20231230NXQR9516S1771	C8S5	295482	168199	154698	159373	128876	83215
20230206NXQR9816S2229	JH1S6	242408	171988	154990	160819	130125	83422
20231230NXQR9516S1866	C35S7	264328	152831	145844	147234	128847	83722
20231230NXQR9516S1852	C31S7	322740	165585	158189	159709	143715	83815
20230206NXQR9816S2214	C50S1	212299	153451	143982	147302	128103	83892
20231230NXQR9516S1836	C27S5	291258	158136	146395	149591	126002	84136
20231230NXQR9516S1774	C10S3	329768	179933	158537	164840	121679	84321
20231230NXQR9516S1862	C35S3	276037	158924	152610	153947	133804	84840
20231230NXQR9516S1780	C12s2	321670	167331	158337	161875	140128	84988
20230206NXQR9816S2133	C37S7	176759	129920	127948	128302	123780	85161
20230206NXQR9816S2173	UP2S4	232113	148743	136934	140572	118570	85307
20230206NXQR9816S2224	JH1S1	225183	170110	162728	165080	143358	85530
20230206NXQR9816S2145	C41S5	214692	157613	149394	152226	134818	85678
20230206NXQR9816S2197	CG3S6	246562	173114	161251	165704	140186	85744
20230206NXQR9816S2130	C37S4	226787	159126	150689	154041	136423	85971
20231230NXQR9516S1846	C31S1	302144	163410	156742	158433	136798	86229
20231230NXQR9516S1768	C8S2	266118	153113	142297	145293	120645	86247
20230206NXQR9816S2195	CG3S4	255255	185621	172002	175704	144983	86351
20231230NXQR9516S1778	C10S7	326651	186629	176138	180368	154496	86404
20231230NXQR9516S1756	C2S5	293384	148796	137420	140932	117785	86644
20231230NXQR9516S1760	C4S4	286387	151382	141299	144401	122656	86709
20230206NXQR9816S2181	CUK1S2	236857	161662	158777	158993	151598	86749
20231230NXQR9516S1838	C27S7	278401	156962	147746	149592	129852	86870
20230206NXQR9816S2172	UP2S3	203305	136068	129301	131582	115645	87377
20231230NXQR9516S1775	C10S4	327269	178443	166703	171097	145427	87584
20231230NXQR9516S1754	C2S3	297770	156667	145733	148728	125368	87682
20231230NXQR9516S1762	C6S1	319106	183855	169126	172908	139893	88180
20231230NXQR9516S1850	C31S5	323300	170949	160626	164538	140733	88508
20230206NXQR9816S2215	C50S2	227714	163430	152298	156925	135507	88883
20231230NXQR9516S1759	C4S3	290921	165721	155078	158965	135366	88889
20230206NXQR9816S2148	C43S1	243326	161114	152783	155498	136089	89099
20231230NXQR9516S1834	C27S3	309619	174549	161699	165902	139743	89496
20230206NXQR9816S2179	UP2S10	295521	207671	191207	193101	163819	90335
20231230NXQR9516S1763	C6S2	301726	172254	159911	163269	134593	90489
20230206NXQR9816S2139	C39S6	217836	143866	134073	137313	117625	90673
20231230NXQR9516S1830	C25S6	286306	160138	148494	151161	126430	91395
20230206NXQR9816S2135	C39S2	247576	173974	163027	167049	145775	91462
20231230NXQR9516S1767	C8S1	306512	181587	168176	172276	141491	91732
20231230NXQR9516S1860	C35S1	288943	165700	159102	161310	142064	91825
20230206NXQR9816S2204	C47S5	246950	164843	154612	158738	139635	91910
20230206NXQR9816S2183	CUK1S4	229419	162261	157097	158601	144184	92459
20231230NXQR9516S1858	CUK1S4	286072	163027	153364	155840	134907	92929
20231230NXQR9516S1854	C33S2	321091	181767	168956	173420	144808	92936
20230206NXQR9816S2134	C39S1	216935	154877	145621	149428	131010	93060
20231230NXQR9516S1766	C6S5	290464	167382	155416	158766	132169	93748
20230206NXQR9816S2207	C49S1	231762	167191	159143	161606	144155	93863
20231230NXQR9516S1770	C8S4	313237	182157	168511	173078	144250	94013
20230206NXQR9816S2178	UP2S9	255966	181668	169712	173071	147297	94574
20230206NXQR9816S2223	KOL3S3	258033	188242	174163	178659	153235	94737
20230206NXQR9816S2129	C37S3	244482	174553	165370	168863	149721	94754
20230206NXQR9816S2200	C47S1	257326	181799	172744	175497	156451	97404
20230206NXQR9816S2219	C50S6	225472	163534	152616	156151	134744	100612
20231230NXQR9516S1779	C12S1	305700	168212	158794	162495	140296	101714
20231230NXQR9516S1764	C6S3	327483	181521	170122	174248	150498	103130
20231230NXQR9516S1758	C4S2	298614	172808	161431	164341	139447	104547
20230206NXQR9816S2180	CUK1S1	246101	178719	169967	173428	153930	105738
20230206NXQR9816S2203	C47S4	279940	193055	182709	186846	167335	106453
20230206NXQR9816S2176	UP2S7	246166	180618	170487	173961	153392	111785
20230206NXQR9816S2131	C37S5	265736	186869	179428	182047	165198	113006
20230206NXQR9816S2175	UP2S6	291011	218115	210563	213038	186590	123274
