# Supplementary material for: Antibiotic Contamination and AMR Dynamics in the Urban Sewage Microbiome: Insights from a Longitudinal surveillance
Source: Research Square preprint supplement (doi:10.21203/rs.3.rs-6137541/v1), 2025-03-12
Supplement: Supplementary file 7 [file b7f898e3674f418b24c776e8.xlsx]

## Sheet: S7a
Table S7a: Information of whole genome sequences from sewage isolates
S. No	Lab ID	Sample ID	Assembly ID	Bacterial species after NGS	Location	Zone	Sample source	Date of collection	Genome size	No of CDS
1	C1S1B2	SWG_1	R87_S36	P. mirabilis	Faridabad	North India	Sewage	2023-06-01	4061061	3663
2	C1S3B1	SWG_2	R87_S37	P. mirabilis	Faridabad	North India	Sewage	2023-06-01	4066496	3679
3	C1S4B1	SWG_3	R87_S38	P. mirabilis	Faridabad	North India	Sewage	2023-06-01	4008889	3587
4	C1S4B2	SWG_4	R87_S39	Providencia sp.	Faridabad	North India	Sewage	2023-06-01	4336154	3965
5	C2S2B1	SWG_5	R87_S41	P. rettgeri	Faridabad	North India	Sewage	2023-06-01	4452613	4007
6	C2S3B1	SWG_6	R87_S42	M. morganii	Faridabad	North India	Sewage	2023-06-01	3885144	3679
7	C3S5B2	SWG_7	R87_S43	E. coli	Faridabad	North India	Sewage	2023-06-01	4663163	4324
8	C3S5B3	SWG_8	R87_S44	E. cloacae	Faridabad	North India	Sewage	2023-06-01	4902315	4597
9	C4S1B1	SWG_9	R87_S45	P. stuartii	Faridabad	North India	Sewage	2023-06-01	4377069	4034
10	C4S2B1	SWG_10	R87_S46	M. morganii	Faridabad	North India	Sewage	2023-06-01	3893078	3679
11	C4S4B1	SWG_11	R87_S47	Providencia sp.	Faridabad	North India	Sewage	2023-06-01	4437896	4093
12	C5S1B1	SWG_12	R87_S48	P. manganoxydans	Faridabad	North India	Sewage	2023-06-01	4861801	3987
13	C5S3B2	SWG_13	R87_S50	P. rettgeri	Faridabad	North India	Sewage	2023-06-01	4452347	4114
14	C6S3B2	SWG_14	R87_S51	E. coli	Faridabad	North India	Sewage	2023-07-01	4991923	4656
15	C6S4B1	SWG_15	R87_S52	P. manganoxydans	Faridabad	North India	Sewage	2023-07-01	4681870	4208
16	C7S4B1	SWG_16	R87_S53	M. morganii	Faridabad	North India	Sewage	2023-07-01	4114822	3878
17	C7S5B2	SWG_17	R87_S54	E. roggenkampii	Faridabad	North India	Sewage	2023-07-01	4945634	4642
18	C7S6B1	SWG_18	R87_S55	P. manganoxydans	Faridabad	North India	Hospital outlet	2023-07-01	4564119	4080
19	C8S5B1	SWG_19	R87_S56	P. manganoxydans	Faridabad	North India	Sewage	2023-07-01	4748261	4395
20	C8S5B2	SWG_20	R87_S57	E. roggenkampii	Faridabad	North India	Sewage	2023-07-01	5025144	4625
21	C9S2B1	SWG_21	R87_S58	P. manganoxydans	Faridabad	North India	Sewage	2023-07-01	4689670	4223
22	C9S5B1	SWG_22	R87_S59	P. rettgeri	Faridabad	North India	Sewage	2023-07-01	5155472	4241
23	C9S5B2	SWG_23	R87_S60	P. manganoxydans	Faridabad	North India	Sewage	2023-07-01	4471208	3978
24	C10S4B1	SWG_24	R87_S61	M. morganii	Faridabad	North India	Sewage	2023-07-01	4025508	3774
25	C10S6B1	SWG_25	R87_S62	M. morganii	Faridabad	North India	Hospital outlet	2023-07-01	3817279	3575
26	C11S1B1	SWG_26	R87_S63	M. morganii	Faridabad	North India	Sewage	2023-07-01	3930869	3687
27	C11S3B2	SWG_27	R87_S64	P. mirabilis	Faridabad	North India	Sewage	2023-07-01	3996522	3555
28	C11S4B2	SWG_28	R87_S65	P. manganoxydans	Faridabad	North India	Sewage	2023-07-01	4208994	3759
29	C11S5B1	SWG_29	R87_S66	M. morganii	Faridabad	North India	Sewage	2023-07-01	3952307	3733
30	C11S5B2	SWG_30	R87_S67	P. manganoxydans	Faridabad	North India	Sewage	2023-07-01	4130498	3715
31	C11S6B1	SWG_31	R87_S68	M. morganii	Faridabad	North India	Hospital outlet	2023-07-01	3990801	3769
32	C11S6B2	SWG_32	R87_S69	P. stuartii	Faridabad	North India	Hospital outlet	2023-07-01	4374284	3891
33	C11S6B3	SWG_33	R87_S70	Aeromonas sp.	Faridabad	North India	Hospital outlet	2023-07-01	5167497	4673
34	C11S7B1	SWG_34	R87_S71	M. morganii	Faridabad	North India	Hospital outlet	2023-07-01	3906998	3665
35	C11S7B2	SWG_35	R87_S72	P. manganoxydans	Faridabad	North India	Hospital outlet	2023-07-01	4639115	4169
36	C12S2B1	SWG_36	R87_S73	P. rettgeri	Faridabad	North India	Sewage	2023-07-01	4890523	4552
37	C12S2B2	SWG_37	R87_S74	P. manganoxydans	Faridabad	North India	Sewage	2023-07-01	4739447	4328
38	C12S3B1	SWG_38	R87_S75	P. manganoxydans	Faridabad	North India	Sewage	2023-07-01	4481699	3987
39	C12S5B1	SWG_39	R87_S76	P. rettgeri	Faridabad	North India	Sewage	2023-07-01	4803390	4457
40	C13S2B1	SWG_40	R87_S77	Enterobacter sp.	Faridabad	North India	Sewage	2023-07-01	4776436	4410
41	C13S3B1	SWG_41	R87_S78	E. coli	Faridabad	North India	Sewage	2023-07-01	4903772	4592
42	C13S4B1	SWG_42	R87_S79	P. rettgeri	Faridabad	North India	Sewage	2023-07-01	4595101	4272
43	C10S1AB2	SWG_43	R87_S80	E. faecium	Faridabad	North India	Sewage	2023-07-01	2959262	2822
44	C10S2AB2	SWG_44	R87_S81	E. faecium	Faridabad	North India	Sewage	2023-07-01	2857985	2695
45	C10S5AB1	SWG_45	R87_S82	M. morganii	Faridabad	North India	Sewage	2023-07-01	3853420	3572
46	C10S6AB2	SWG_46	R87_S84	E. faecium	Faridabad	North India	Hospital outlet	2023-07-01	3111491	3012
47	C10S7AB1	SWG_47	R87_S85	M. morganii	Faridabad	North India	Hospital outlet	2023-07-01	3931443	3692
48	C10S7AB2	SWG_48	R87_S86	E. faecium	Faridabad	North India	Hospital outlet	2023-07-01	2981349	2834
49	C11S2AB1	SWG_49	R87_S87	M. morganii	Faridabad	North India	Sewage	2023-07-01	4001901	3764
50	C11S3AB1	SWG_50	R87_S88	E. faecium	Faridabad	North India	Sewage	2023-07-01	2862681	2713
51	C11S4AB1	SWG_51	R87_S89	E. faecium	Faridabad	North India	Sewage	2023-07-01	2961589	2822
52	C11S5AB1	SWG_52	R87_S90	E. faecium	Faridabad	North India	Sewage	2023-07-01	3087151	2956
53	C11S6AB2	SWG_53	R87_S91	P. mirabilis	Faridabad	North India	Hospital outlet	2023-07-01	4029652	3610
54	C12S1AB1	SWG_54	R87_S92	E. faecium	Faridabad	North India	Sewage	2023-07-01	2806018	2648
55	C12S2AB1	SWG_55	R87_S93	M. morganii	Faridabad	North India	Sewage	2023-07-01	4007249	3776
56	C12S3AB1	SWG_56	R87_S94	E. faecium	Faridabad	North India	Sewage	2023-07-01	3148819	3024
57	C12S4AB1_1	SWG_57	R87_S95	M. morganii	Faridabad	North India	Sewage	2023-07-01	3803941	3553
58	C12S4AB2	SWG_58	R87_S96	E. faecium	Faridabad	North India	Sewage	2023-07-01	2974179	2810
59	C15S3B3	SWG_59	R91_S61	P. manganoxydans	Faridabad	North India	Sewage	2023-08-01	4465330	3975
60	C15S9B2	SWG_60	R91_S62	Providencia sp.	New Delhi	North India	Sewage	2023-08-01	4065578	3690
61	C15S9B3	SWG_61	R91_S63	M. morganii	New Delhi	North India	Sewage	2023-08-01	3983698	3768
62	C16S5B2	SWG_62	R91_S64	P. manganoxydans	Faridabad	North India	Sewage	2023-08-01	4369401	3881
63	C17S3B2	SWG_63	R91_S65	P. manganoxydans	Faridabad	North India	Sewage	2023-08-01	4419585	3932
64	C17S5B1	SWG_64	R91_S66	M. morganii	Faridabad	North India	Sewage	2023-08-01	4191114	4009
65	C17S6B2	SWG_65	R91_S67	Providencia sp.	Faridabad	North India	Hospital outlet	2023-08-01	4399755	4026
66	C18S3B1	SWG_66	R91_S68	M. morganii	Faridabad	North India	Sewage	2023-08-01	4029817	3812
67	HR1S1B1	SWG_67	R91_S69	M. morganii	Haryana	North India	Sewage	2023-09-01	4017894	3814
68	KOL1S1B1	SWG_68	R91_S70	P. putida	Kolkata	East India	Sewage	2023-08-01	5514838	5030
69	KOL1S1B2	SWG_69	R91_S71	E. coli	Kolkata	East India	Sewage	2023-08-01	5216377	4797
70	KOL1S2B2	SWG_70	R91_S72	E. coli	Kolkata	East India	Sewage	2023-08-01	5456915	5152
71	KOL1S3B1	SWG_71	R91_S73	C. freundii	Kolkata	East India	Sewage	2023-08-01	4862114	4519
72	KOL1S3B2	SWG_72	R91_S74	P. putida	Kolkata	East India	Sewage	2023-08-01	6515541	6068
73	CG1S1B1	SWG_73	R91_S75	Aeromonas sp.	Guwahati	North East India	Sewage	2023-08-01	4311164	3884
74	CG1S1B2	SWG_74	R91_S76	E. coli	Guwahati	North East India	Sewage	2023-08-01	5633002	5362
75	CG1S1B3	SWG_75	R91_S77	E. coli	Guwahati	North East India	Sewage	2023-08-01	5028405	4615
76	C19S3B2	SWG_76	R91_S78	M. morganii	Faridabad	North India	Sewage	2023-08-01	4118684	3889
77	C19S3B3	SWG_77	R91_S79	E. coli	Faridabad	North India	Sewage	2023-08-01	5014371	4688
78	C19S4B1	SWG_78	R91_S80	M. morganii	Faridabad	North India	Sewage	2023-08-01	3828958	3551
79	C19S4B2	SWG_79	R91_S81	E. cloacae	Faridabad	North India	Sewage	2023-08-01	4689880	4310
80	C19S5B2	SWG_80	R91_S82	M. morganii	Faridabad	North India	Sewage	2023-08-01	3742400	3478
81	C19S5B3	SWG_81	R91_S83	A. veronii	Faridabad	North India	Sewage	2023-08-01	4558940	4140
82	C19S5B4	SWG_82	R91_S84	A. veronii	Faridabad	North India	Sewage	2023-08-01	4394438	3954
83	C12S4AB1_2	SWG_83	R91_S86	M. morganii	Faridabad	North India	Sewage	2023-07-01	3803219	3551
84	C14S1AB1	SWG_84	R91_S87	E. faecium	Faridabad	North India	Sewage	2023-07-01	2850265	2677
85	C14S6AB1	SWG_85	R91_S90	M. morganii	Faridabad	North India	Hospital outlet	2023-07-01	3960927	3696
86	C14S7AB2	SWG_86	R91_S91	E. faecium	Faridabad	North India	Hospital outlet	2023-07-01	2528765	2361
87	KOL1S2B1	SWG_87	R94_S82	Pseudomonas sp.	Kolkata	East India	Sewage	2023-08-01	5787744	5229
88	KOL1S3B3	SWG_88	R94_S83	P. putida	Kolkata	East India	Sewage	2023-08-01	5532102	5108
89	C19S1B3	SWG_89	R94_S84	E. coli	Faridabad	North India	Sewage	2023-08-01	5004478	4717
90	C19S3B1	SWG_90	R94_S85	K. quasipneumoniae	Faridabad	North India	Sewage	2023-08-01	5647158	5373
91	C19S3B4	SWG_91	R94_S86	A. veronii	Faridabad	North India	Sewage	2023-08-01	4571803	4130
92	C19S6B1	SWG_92	R94_S87	E. coli	Faridabad	North India	Hospital outlet	2023-08-01	5194896	4786
93	C19S6B2	SWG_93	R94_S88	K. pneumoniae	Faridabad	North India	Hospital outlet	2023-08-01	5581204	5279
94	C20S1B2	SWG_94	R94_S90	E. coli	Faridabad	North India	Sewage	2023-08-01	4788583	4557
95	C20S2B1	SWG_95	R94_S91	P. aeruginosa	Faridabad	North India	Sewage	2023-08-01	6699267	6280
96	C20S2B2	SWG_96	R94_S92	K. pneumoniae	Faridabad	North India	Sewage	2023-08-01	5566531	5426
97	C20S3B1	SWG_97	R94_S93	P. mirabilis	Faridabad	North India	Sewage	2023-08-01	4065548	3634
98	C20S3B2	SWG_98	R94_S94	K. pneumoniae	Faridabad	North India	Sewage	2023-08-01	5471191	5162
99	C20S4B1	SWG_99	R94_S95	E. coli	Faridabad	North India	Sewage	2023-08-01	4986492	4619
100	C21S1B1	SWG_100	R94_S96	K. pneumoniae	Faridabad	North India	Sewage	2023-08-01	5516265	5146
101	C21S5B1	SWG_101	R94_S97	P. mirabilis	Faridabad	North India	Sewage	2023-08-01	3918447	3467
102	C21S6B2	SWG_102	R94_S98	E. coli	Faridabad	North India	Hospital outlet	2023-08-01	4856211	4501
103	C22S1B2	SWG_103	R94_S101	E. coli	Faridabad	North India	Sewage	2023-08-01	5277168	4717
104	C22S2B1	SWG_104	R94_S102	E. coli	Faridabad	North India	Sewage	2023-08-01	4956155	4667
105	C22S2B2	SWG_105	R94_S103	A. baumannii	Faridabad	North India	Sewage	2023-08-01	3801305	3443
106	C22S3B1	SWG_106	R94_S104	K. pneumoniae	Faridabad	North India	Sewage	2023-08-01	5583708	5135
107	C22S4B1	SWG_107	R94_S105	E. coli	Faridabad	North India	Sewage	2023-08-01	5023839	4731
108	C22S6B1	SWG_108	R94_S106	E. coli	Faridabad	North India	Hospital outlet	2023-08-01	5157014	4793
109	C22S6B2	SWG_109	R94_S107	P. putida	Faridabad	North India	Hospital outlet	2023-08-01	6123287	5705
110	C22S7B1	SWG_110	R94_S108	C. freundii	Faridabad	North India	Hospital outlet	2023-08-01	5118206	4795
111	C23S1B2	SWG_111	R94_S109	E. coli	Faridabad	North India	Sewage	2023-09-01	4742872	4425
112	C23S2B2	SWG_112	R94_S110	K. pneumoniae	Faridabad	North India	Sewage	2023-09-01	5669628	5496
113	C23S2B3	SWG_113	R94_S111	E. coli	Faridabad	North India	Sewage	2023-09-01	5020775	4719
114	C23S3B2	SWG_114	R94_S112	E. coli	Faridabad	North India	Sewage	2023-09-01	4939227	4555
115	C23S4B3	SWG_115	R94_S113	E. coli	Faridabad	North India	Sewage	2023-09-01	4661716	4319
116	C23S5B1	SWG_116	R94_S114	P. aeruginosa	Faridabad	North India	Sewage	2023-09-01	6761675	6272
117	C23S6B2	SWG_117	R94_S115	E. coli	Faridabad	North India	Hospital outlet	2023-09-01	4945050	4533
118	C23S7B1	SWG_118	R94_S116	E. coli	Faridabad	North India	Hospital outlet	2023-09-01	5301555	4983
119	C24S4B1	SWG_119	R94_S117	C. werkmanii	Faridabad	North India	Sewage	2023-09-01	5322007	5252
120	C24S6B1	SWG_120	R94_S118	Alcaligenes sp.	Faridabad	North India	Hospital outlet	2023-09-01	3772499	3430
121	C24S6B2	SWG_121	R94_S119	C. werkmanii	Faridabad	North India	Hospital outlet	2023-09-01	5080138	4783
122	C24S7B1	SWG_122	R94_S120	P. vulgaris	Faridabad	North India	Hospital outlet	2023-09-01	3999346	3557
123	C15S2AB1	SWG_123	R94_S121	P. mirabilis	Faridabad	North India	Sewage	2023-08-01	4250111	3869
124	C15S9AB1	SWG_124	R94_S123	P. mirabilis	New Delhi	North India	Sewage	2023-08-01	3999622	3617
125	C16S1AB1	SWG_125	R94_S124	E. faecium	Faridabad	North India	Sewage	2023-08-01	2801153	2649
126	CG1S1AB1	SWG_126	R94_S125	A. caviae	Guwahati	North India	Sewage	2023-08-01	4428025	3973
127	C25S1AB1	SWG_127	R94_S126	E. raffinosus	Faridabad	North India	Sewage	2023-09-01	4330301	4232
128	C25S2AB2	SWG_128	R94_S127	E. faecium	Faridabad	North India	Sewage	2023-09-01	3038957	2870
129	C25S4AB2	SWG_129	R94_S129	E. faecium	Faridabad	North India	Sewage	2023-09-01	2814975	2667
130	C26S2AB1	SWG_130	R94_S132	E. faecium	Faridabad	North India	Sewage	2023-09-01	2982936	2847
131	C26S5AB1	SWG_131	R94_S134	E. faecium	Faridabad	North India	Sewage	2023-09-01	2879134	2705
132	C26S7AB1	SWG_132	R94_S135	E. faecium	Faridabad	North India	Hospital outlet	2023-09-01	2853804	2698
133	C23S3B1	SWG_133	R94_S136	P. rettgeri	Faridabad	North India	Sewage	2023-09-01	4533217	4187
134	C23S4B2	SWG_134	R94_S137	M. morganii	Faridabad	North India	Sewage	2023-09-01	3976369	3738
135	C24S2B1	SWG_135	R94_S138	K. pneumoniae	Faridabad	North India	Sewage	2023-09-01	5516010	5151
136	C24S3B2	SWG_136	R94_S139	E. coli	Faridabad	North India	Sewage	2023-09-01	5159285	4882
137	C24S5B1	SWG_137	R94_S140	C. werkmanii	Faridabad	North India	Sewage	2023-09-01	5384972	5188
138	C24S5B2	SWG_138	R94_S141	P. aeruginosa	Faridabad	North India	Sewage	2023-09-01	6741478	6190
139	C25S2B2	SWG_139	R94_S142	E. coli	Faridabad	North India	Sewage	2023-09-01	5147609	4850
140	C25S3B2	SWG_140	R94_S143	E. coli	Faridabad	North India	Sewage	2023-09-01	5113325	4669
141	C25S4B2	SWG_141	R94_S144	K. pneumoniae	Faridabad	North India	Sewage	2023-09-01	5598006	5195
142	C25S4B3	SWG_142	R94_S145	E. coli	Faridabad	North India	Sewage	2023-09-01	5310295	4979
143	C25S5B2	SWG_143	R94_S146	K. pneumoniae	Faridabad	North India	Sewage	2023-09-01	5444261	5091
144	C25S6B2	SWG_144	R94_S147	K. pneumoniae	Faridabad	North India	Hospital outlet	2023-09-01	5702781	5324
145	C26S1B1	SWG_145	R94_S148	E. coli	Faridabad	North India	Sewage	2023-09-01	5261756	4892
146	C26S2B1	SWG_146	R94_S149	K. pneumoniae	Faridabad	North India	Sewage	2023-09-01	5350298	4961
147	C26S3B2	SWG_147	R94_S150	K. quasipneumoniae	Faridabad	North India	Sewage	2023-09-01	5421505	5054
148	C26S5B2	SWG_148	R94_S151	E. coli	Faridabad	North India	Sewage	2023-09-01	5096291	4804
149	C26S5B3	SWG_149	R94_S152	K. quasipneumoniae	Faridabad	North India	Sewage	2023-09-01	5329368	4981
150	C26S6B2	SWG_150	R94_S153	E. coli	Faridabad	North India	Hospital outlet	2023-09-01	5368667	4861
151	C26S7B2	SWG_151	R94_S155	Alcaligenes sp.	Faridabad	North India	Hospital outlet	2023-09-01	3773631	3437
152	C26S7B3	SWG_152	R94_S156	C. werkmanii	Faridabad	North India	Hospital outlet	2023-09-01	5143072	4815
153	C27S5B3	SWG_153	R94_S157	K. pneumoniae	Faridabad	North India	Sewage	2023-09-01	5541865	5319
154	C27S6B3	SWG_154	R94_S158	A. caviae	Faridabad	North India	Hospital outlet	2023-09-01	4570854	4128
155	C28S2B1	SWG_155	R94_S159	E. coli	Faridabad	North India	Sewage	2023-09-01	5292639	4932
156	C28S3B1	SWG_156	R94_S160	K. quasipneumoniae	Faridabad	North India	Sewage	2023-09-01	5887114	5432
157	C28S3B2	SWG_157	R94_S161	E. coli	Faridabad	North India	Sewage	2023-09-01	4919333	4641
158	C28S4B3	SWG_158	R94_S162	E. coli	Faridabad	North India	Sewage	2023-09-01	5292513	4920
159	C28S5B2	SWG_159	R94_S163	E. coli	Faridabad	North India	Sewage	2023-09-01	4790968	4498
160	C28S6B1	SWG_160	R94_S164	C. freundii	Faridabad	North India	Hospital outlet	2023-09-01	5384601	5154
161	C28S6B3	SWG_161	R94_S165	E. coli	Faridabad	North India	Hospital outlet	2023-09-01	5025236	4704
162	C29S2B3	SWG_162	R94_S166	A. baumannii	Faridabad	North India	Sewage	2023-09-01	4057506	3861
163	C29S4B2	SWG_163	R94_S167	K. pneumoniae	Faridabad	North India	Sewage	2023-09-01	5631542	5265
164	C29S5B1	SWG_164	R94_S168	E. coli	Faridabad	North India	Sewage	2023-09-01	5037478	4683
165	C29S7B1	SWG_165	R94_S169	P. putida	Faridabad	North India	Hospital outlet	2023-09-01	5103294	4555
166	C30S5B1	SWG_166	R94_S170	E. coli	Faridabad	North India	Sewage	2023-09-01	5240012	4980
167	C30S6B1	SWG_167	R94_S171	E. coli	Faridabad	North India	Hospital outlet	2023-09-01	4893205	4559
168	C33S1B1	SWG_168	R94_S172	P. mirabilis	Faridabad	North India	Sewage	2023-10-01	4087062	3696
169	C33S2B1	SWG_169	R94_S173	E. coli	Faridabad	North India	Sewage	2023-10-01	5102539	4829
170	C33S2B2	SWG_170	R94_S174	K. pneumoniae	Faridabad	North India	Sewage	2023-10-01	5516279	5148
171	C33S6B1	SWG_171	R94_S175	A. baumannii	Faridabad	North India	Hospital outlet	2023-10-01	3927063	3669
172	C33S6B2	SWG_172	R94_S176	E. coli	Faridabad	North India	Hospital outlet	2023-10-01	5250548	4990
173	C33S7B1	SWG_173	R94_S177	Alcaligenes sp.	Faridabad	North India	Hospital outlet	2023-10-01	3775228	3443
174	C35S1B1	SWG_174	R94_S178	E. coli	Faridabad	North India	Sewage	2023-10-01	5313198	4999
175	C35S2B1	SWG_175	R94_S179	E. coli	Faridabad	North India	Sewage	2023-10-01	5334261	5021
176	C35S2B2	SWG_176	R94_S180	E. coli	Faridabad	North India	Sewage	2023-10-01	5168393	4914
177	C35S3B2	SWG_177	R94_S181	E. coli	Faridabad	North India	Sewage	2023-10-01	5110941	4792
178	C35S4B1	SWG_178	R94_S182	Citrobacter sp.	Faridabad	North India	Sewage	2023-10-01	4703980	4419
179	C35S4B2	SWG_179	R94_S183	E. coli	Faridabad	North India	Sewage	2023-10-01	5100952	4845
180	C35S5B1	SWG_180	R94_S184	K. pneumoniae	Faridabad	North India	Sewage	2023-10-01	5192771	4911
181	C30S1B2	SWG_181	R94_S185	E. coli	Faridabad	North India	Sewage	2023-09-01	4855656	4577
182	C30S2B3_1	SWG_182	R94_S186	A. baumannii	Faridabad	North India	Sewage	2023-09-01	3947443	3751
183	C31S2B1	SWG_183	R94_S187	E. coli	Faridabad	North India	Sewage	2023-10-01	4744607	4391
184	C31S3B1_1	SWG_184	R94_S188	C. werkmanii	Faridabad	North India	Sewage	2023-10-01	5033152	4724
185	C31S4B1	SWG_185	R94_S189	K. pneumoniae	Faridabad	North India	Sewage	2023-10-01	5647079	5291
186	C31S6B2	SWG_186	R94_S190	Pseudomonas sp.	Faridabad	North India	Hospital outlet	2023-10-01	5858590	5283
187	C32S6B2	SWG_187	R94_S191	E. coli	Faridabad	North India	Hospital outlet	2023-10-01	5058525	4765
188	C34S3B1	SWG_188	R94_S193	A. veronii	Faridabad	North India	Sewage	2023-10-01	4764228	4289
189	C31S5B1	SWG_189	R94_S194	K. pneumoniae	Faridabad	North India	Sewage	2023-10-01	5284844	4940
190	C34S4B1_1	SWG_190	R94_S195	P. rettgeri	Faridabad	North India	Sewage	2023-10-01	4681426	4389
191	C34S6B2	SWG_191	R94_S196	K. pneumoniae	Faridabad	North India	Hospital outlet	2023-10-01	5629835	5417
192	C34S7B1	SWG_192	R94_S197	B. trematum	Faridabad	North India	Hospital outlet	2023-10-01	4402807	4184
193	C34S7B2	SWG_193	R94_S198	E. coli	Faridabad	North India	Hospital outlet	2023-10-01	4950115	4637
194	C34S3B2	SWG_194	R94_S199	E. coli	Faridabad	North India	Sewage	2023-10-01	4686674	4327
195	C34S5B1	SWG_195	R94_S200	K. pneumoniae	Faridabad	North India	Sewage	2023-10-01	5470760	5185
196	C36S3B1	SWG_196	R94_S201	C. werkmanii	Faridabad	North India	Sewage	2023-10-01	5181335	4983
197	C36S4B2	SWG_197	R94_S202	E. cloacae	Faridabad	North India	Sewage	2023-10-01	4745147	4525
198	C36S6B2	SWG_198	R94_S203	E. coli	Faridabad	North India	Hospital outlet	2023-10-01	4967185	4654
199	CG2S1AB1	SWG_199	R94_S204	E. faecium	Guwahati	North East India	Sewage	2023-08-01	2894404	2735
200	C35S6B2	SWG_200	R94_S205	E. coli	Faridabad	North India	Hospital outlet	2023-10-01	4770004	4445
201	C35S7B2	SWG_201	R94_S206	E. coli	Faridabad	North India	Hospital outlet	2023-10-01	5329547	4989
202	C36S3B2	SWG_202	R100_S254	Citrobacter sp.	Faridabad	North India	Sewage	2023-10-01	5298250	5000
203	C36S4B1	SWG_203	R100_S255	E. cloacae	Faridabad	North India	Sewage	2023-10-01	4821166	4494
204	C36S6B1	SWG_204	R100_S256	Citrobacter sp.	Faridabad	North India	Hospital outlet	2023-10-01	4983643	4656
205	C36S7B1	SWG_205	R100_S257	C. werkmanii	Faridabad	North India	Hospital outlet	2023-10-01	5087068	4852
206	C32S4B2	SWG_206	R100_S258	K. pneumoniae	Faridabad	North India	Sewage	2023-10-01	5292070	4969
207	C38S1B2	SWG_207	R100_S259	L. fusiformis	Faridabad	North India	Sewage	2023-10-01	4065708	3672
208	C38S3B2	SWG_208	R100_S260	L. fusiformis	Faridabad	North India	Sewage	2023-10-01	4505685	4278
209	C41S2B1	SWG_209	R100_S261	P. aeruginosa	Faridabad	North India	Sewage	2023-10-01	6731268	6192
210	C41S2B2	SWG_210	R100_S262	K. pneumoniae	Faridabad	North India	Sewage	2023-10-01	5485336	5079
211	C42S3B1	SWG_211	R100_S263	E. hormaechei	Faridabad	North India	Sewage	2023-10-01	4755619	4466
212	C34S4B1_2	SWG_212	R100_S264	C. werkmanii	Faridabad	North India	Sewage	2023-10-01	5076412	4795
213	C37S3B1	SWG_213	R100_S265	K. pneumoniae	Faridabad	North India	Sewage	2023-10-01	5447965	5133
214	C39S6B2	SWG_214	R100_S267	P. aeruginosa	Faridabad	North India	Hospital outlet	2023-10-01	6723305	6152
215	C40S4B2	SWG_215	R100_S268	K. quasipneumoniae	Faridabad	North India	Sewage	2023-11-01	4857349	4526
216	C42S4B1	SWG_216	R100_S269	P. mirabilis	Faridabad	North India	Sewage	2023-11-01	3945090	3547
217	C42S5B1	SWG_217	R100_S270	P. mirabilis	Faridabad	North India	Sewage	2023-11-01	3952133	3566
218	C41S6B2	SWG_218	R100_S271	Citrobacter sp.	Faridabad	North India	Hospital outlet	2023-11-01	5082271	4756
219	C43S1B1	SWG_219	R100_S272	K. pneumoniae	Faridabad	North India	Sewage	2023-11-01	5467856	5125
220	C49S2B3_1	SWG_220	R100_S274	M. morganii	Faridabad	North India	Sewage	2023-12-01	3805162	3538
221	C44S7B2	SWG_221	R100_S275	E. coli	Faridabad	North India	Hospital outlet	2023-11-01	5142442	4752
222	C45S6B1	SWG_222	R100_S276	K. pneumoniae	Faridabad	North India	Hospital outlet	2023-11-01	5580913	5214
223	C46S2B1	SWG_223	R100_S277	C. werkmanii	Faridabad	North India	Sewage	2023-11-01	4862791	4609
224	C44S3B1	SWG_224	R100_S278	M. morganii	Faridabad	North India	Sewage	2023-11-01	4127675	3919
225	C42S1B1	SWG_225	R100_S279	E. hormaechei	Faridabad	North India	Sewage	2023-11-01	4625626	4329
226	C43S3B1	SWG_226	R100_S280	K. pneumoniae	Faridabad	North India	Sewage	2023-11-01	5536482	5113
227	C43S6B1	SWG_227	R100_S281	C. werkmanii	Faridabad	North India	Hospital outlet	2023-11-01	5229466	4801
228	C45S1B1	SWG_228	R100_S282	K. pneumoniae	Faridabad	North India	Sewage	2023-11-01	5605625	5417
229	C47S1B2	SWG_229	R100_S283	Citrobacter sp.	Faridabad	North India	Sewage	2023-11-01	5252115	4974
230	C47S6B3	SWG_230	R100_S284	P. mirabilis	Faridabad	North India	Hospital outlet	2023-11-01	3939237	3571
231	C48S1B3	SWG_231	R100_S285	M. morganii	Faridabad	North India	Sewage	2023-12-01	3945105	3753
232	C48S3B1	SWG_232	R100_S287	P. rettgeri	Faridabad	North India	Sewage	2023-12-01	4483506	4190
233	C48S3B2	SWG_233	R100_S288	C. werkmanii	Faridabad	North India	Sewage	2023-12-01	4898333	4608
234	C48S4B2	SWG_234	R100_S289	K. pneumoniae	Faridabad	North India	Sewage	2023-12-01	5236020	4918
235	C48S5B2	SWG_235	R100_S290	A. veronii	Faridabad	North India	Sewage	2023-12-01	4581402	4173
236	C48S5B4	SWG_236	R100_S291	E. roggenkampii	Faridabad	North India	Sewage	2023-12-01	4730030	4412
237	C49S1B1	SWG_237	R100_S292	E. coli	Faridabad	North India	Sewage	2023-12-01	5003424	4723
238	UPS3B3	SWG_238	R100_S293	P. mirabilis	Uttar Pradesh	North India	Sewage	2023-12-01	3913407	3547
239	UPS2B4	SWG_239	R100_S294	E. coli	Uttar Pradesh	North India	Sewage	2023-12-01	5162138	4652
240	UPS2B2	SWG_240	R100_S295	M. morganii	Uttar Pradesh	North India	Sewage	2023-12-01	3847437	3597
241	UPS1B1	SWG_241	R100_S296	E. coli	Uttar Pradesh	North India	Sewage	2023-12-01	4748769	4398
242	UPS4B2	SWG_242	R100_S297	A. baumannii	Uttar Pradesh	North India	Sewage	2023-12-01	3817775	3546
243	UPS4B4	SWG_243	R100_S298	K. pneumoniae	Uttar Pradesh	North India	Sewage	2023-12-01	5685510	5271
244	UPS5B1	SWG_244	R100_S299	E. coli	Uttar Pradesh	North India	Sewage	2023-12-01	5118913	4736
245	UPS6B3	SWG_245	R100_S302	C. werkmanii	Uttar Pradesh	North India	Sewage	2023-12-01	4824571	4527
246	UPS7B1	SWG_246	R100_S303	K. pneumoniae	Uttar Pradesh	North India	Sewage	2023-12-01	5588526	5198
247	UPS3B2	SWG_247	R100_S304	C. portucalensis	Uttar Pradesh	North India	Sewage	2023-12-01	4905325	4581
248	UPS9B1	SWG_248	R100_S305	K. pneumoniae	Uttar Pradesh	North India	Sewage	2023-12-01	5544608	5136
249	UPS10B1	SWG_249	R100_S306	E. coli	Uttar Pradesh	North India	Sewage	2023-12-01	5133952	4772
250	UPS4B3	SWG_250	R100_S307	M. morganii	Uttar Pradesh	North India	Sewage	2023-12-01	3855991	3584
251	UPS8B1	SWG_251	R100_S308	P. penneri	Uttar Pradesh	North India	Sewage	2023-12-01	3917480	3473
252	UPS10B2	SWG_252	R100_S309	K. pneumoniae	Uttar Pradesh	North India	Sewage	2023-12-01	5568793	5144
253	DEHRA-1	SWG_253	R100_S310	E. coli	Dehradun	North India	Sewage	2023-12-01	5008776	4709
254	HARI-2	SWG_254	R100_S313	E. coli	Haridwar	North India	Sewage	2023-12-01	4719212	4379
255	GUW-4B1	SWG_255	R100_S316	C. freundii	Guwahati	North East India	Sewage	2023-12-01	5041800	4977
256	CG3S7B2	SWG_256	R100_S321	M. morganii	Guwahati	North East India	Sewage	2023-12-01	3985576	3861
257	JH1S2B2	SWG_257	R100_S324	E. coli	Jharkhand	East India	Sewage	2023-12-01	5138959	4844
258	JH1S10B1	SWG_258	R100_S325	P. putida	Jharkhand	East India	Sewage	2023-12-01	5125659	4868
259	JH1S1B5	SWG_259	R100_S326	C. aquatica	Jharkhand	East India	Sewage	2023-12-01	3647586	3348
260	C49S4B1	SWG_260	R100_S327	E. roggenkampii	Faridabad	North India	Sewage	2023-12-01	4953878	4552
261	C49S5B1	SWG_261	R100_S328	A. simiae	Faridabad	North India	Sewage	2023-12-01	3959659	3702
262	C49S6B2	SWG_262	R100_S329	K. michiganensis	Faridabad	North India	Hospital outlet	2023-12-01	5852420	5373
263	C50S2B2	SWG_263	R100_S330	A. baumannii	Faridabad	North India	Sewage	2023-12-01	3978248	3751
264	C30S2B3_2	SWG_264	R100_S331	A. baumannii	Faridabad	North India	Sewage	2023-09-01	3943467	3748
265	C31S3B1_2	SWG_265	R100_S332	C. werkmanii	Faridabad	North India	Sewage	2023-10-01	5030458	4733
266	JHS3AB2	SWG_266	R100_S334	E. faecium	Jharkhand	East India	Sewage	2023-12-01	3012958	2859
267	C49S1B2	SWG_267	R100_S336	E. coli	Faridabad	North India	Sewage	2023-12-01	4791260	4466
268	C49S2B3_2	SWG_268	R100_S337	M. morganii	Faridabad	North India	Sewage	2023-12-01	3866060	3605
269	C49S4B2	SWG_269	R100_S338	K. pneumoniae	Faridabad	North India	Sewage	2023-12-01	5597773	5169
270	C50S1B2	SWG_270	R100_S339	M. morganii	Faridabad	North India	Sewage	2023-12-01	4064349	3861
271	C50S3B2	SWG_271	R100_S340	P. rettgeri	Faridabad	North India	Sewage	2023-12-01	4671282	4385
272	C50S4B3	SWG_272	R100_S341	K. quasipneumoniae	Faridabad	North India	Sewage	2023-12-01	5384566	5107
273	C35S2AB1	SWG_273	R100_S342	K. pneumoniae	Faridabad	North India	Sewage	2023-10-01	5494686	5112
274	C37S1AB1	SWG_274	R100_S343	P. mirabilis	Faridabad	North India	Sewage	2023-10-01	3922682	3523
275	C45S2AB3	SWG_275	R100_S345	C. werkmanii	Faridabad	North India	Sewage	2023-11-01	5025961	4740
276	C42S2AB1_1	SWG_276	R100_S347	P. mirabilis	Faridabad	North India	Sewage	2023-11-01	4193158	3730
277	C41S1AB2	SWG_277	R100_S348	Citrobacter sp.	Faridabad	North India	Sewage	2023-11-01	5014942	4792
278	UP1S3AB1	SWG_278	R100_S349	P. mirabilis	Uttar Pradesh	North India	Sewage	2023-12-01	4095552	3725
279	UP1S4AB1	SWG_279	R100_S350	P. mirabilis	Uttar Pradesh	North India	Sewage	2023-12-01	4012480	3585
280	UP1S5AB2	SWG_280	R100_S351	C. werkmanii	Uttar Pradesh	North India	Sewage	2023-12-01	5071411	4822
281	UP1S6AB2	SWG_281	R100_S352	M. morganii	Uttar Pradesh	North India	Sewage	2023-12-01	3898918	3657
282	RISHI_AB1	SWG_282	R100_S353	P. vulgaris	Rishikesh	North India	Sewage	2023-12-01	3835090	3422
283	C43S5B1_1	SWG_283	R100_S354	E. coli	Faridabad	North India	Sewage	2023-11-01	4770131	4435
284	DEHRA_AB2	SWG_284	R100_S355	C. werkmanii	Dehradun	North India	Sewage	2023-12-01	4971410	4718
285	C45S6AB2	SWG_285	R100_S356	P. mirabilis	Faridabad	North India	Hospital outlet	2023-11-01	3971362	3602
286	CG3S4AB1	SWG_286	R100_S357	E. coli	Guwahati	East India	Sewage	2023-12-01	5087694	4836
287	CG3S6AB1	SWG_287	R100_S358	E. faecium	Guwahati	East India	Sewage	2023-12-01	2940395	2759
288	CG3S1B1	SWG_288	R100_S359	Pseudomonas sp.	Guwahati	East India	Sewage	2023-12-01	5117458	4646
289	HARI_AB1	SWG_289	R100_S360	C. werkmanii	Haridwar	North India	Sewage	2023-12-01	5028259	4764
290	C41S6AB1	SWG_290	R100_S362	E. coli	Faridabad	North India	Hospital outlet	2023-11-01	4727232	4404
291	KOL-1AB1(3)	SWG_291	R100_S363	A. veronii	Kolkata	East India	Sewage	2023-12-01	4453914	4045
292	C43S5B1_2	SWG_292	R100_S366	E. coli	Faridabad	North India	Sewage	2023-11-01	4735983	4401
293	KOL-2B1	SWG_293	R100_S367	Achromobacter sp.	Kolkata	East India	Sewage	2023-10-01	6234810	5606
294	C43S5B3	SWG_294	R100_S368	P. aeruginosa	Faridabad	North India	Sewage	2023-11-01	6793580	6226
295	RISHI-1	SWG_295	R100_S370	E. hormaechei	Rishikesh	North India	Sewage	2023-12-01	4570152	4248
296	DEHRA_AB1	SWG_296	R100_S374	E. coli	Dehradun	North India	Sewage	2023-12-01	5427116	4947
297	GUW S5 AB2	SWG_297	R100_S375	E. cloacae	Guwahati	East India	Sewage	2023-12-01	4451636	4466
298	C29S6B2	SWG_298	R100_S376	P. mirabilis	Faridabad	North India	Hospital outlet	2023-09-01	3913441	3517
299	C42S2AB1_2	SWG_299	R100_S377	P. mirabilis	Faridabad	North India	Sewage	2023-11-01	4088949	3699
300	C49S6AB1	SWG_300	R100_S378	E. coli	Faridabad	North India	Hospital outlet	2023-12-01	5358794	5047
301	C10S4B2	SWG_301	R100_S379	P. manganoxydans	Faridabad	North India	Sewage	2023-07-01	4473150	4089
302	C12S5B2	SWG_302	R100_S380	E. roggenkampii	Faridabad	North India	Sewage	2023-07-01	4741076	4434
303	C30S2B2	SWG_303	R100_S381	A. baumannii	Faridabad	North India	Sewage	2023-09-01	3945934	3750
304	C29S4B1	SWG_304	R100_S382	C. werkmanii	Faridabad	North India	Sewage	2023-09-01	4962038	4738
305	C45S3AB3	SWG_305	R100_S383	P. mirabilis	Faridabad	North India	Sewage	2023-11-01	4098170	3726

## Sheet:  S7b
Table S7b: Metadata of clinical E. coli isolates from NCBI database
S. No.	Assembly	Sample source	Location	Year of collection
1	GCA_007954215.2	Unknown	USA: Gainesville	2019
2	GCA_007954255.1	Unknown	USA	2019
3	GCA_008180545.1	Unknown	USA	2019
4	GCA_009905115.1	feces	Singapore	2019
5	GCA_009905135.1	feces	Singapore	2019
6	GCA_011030155.1	Unknown	Lebanon	2019
7	GCA_011821595.1	human	United Kingdom: United Kingdom	2019
8	GCA_011842285.1	human	United Kingdom: United Kingdom	2019
9	GCA_011846165.1	human	United Kingdom: United Kingdom	2019
10	GCA_011853625.2	Unknown	United Kingdom: United Kingdom	2019
11	GCA_011853925.1	human	United Kingdom: United Kingdom	2019
12	GCA_011862085.1	human	United Kingdom: United Kingdom	2019
13	GCA_011873745.1	human	United Kingdom: United Kingdom	2019
14	GCA_011879345.1	human	United Kingdom: United Kingdom	2019
15	GCA_011885385.1	human	United Kingdom: United Kingdom	2019
16	GCA_011909465.1	human	United Kingdom: United Kingdom	2019
17	GCA_011915165.2	human	United Kingdom: United Kingdom	2019
18	GCA_011923805.1	human	United Kingdom: United Kingdom	2019
19	GCA_011930645.1	human	United Kingdom: United Kingdom	2019
20	GCA_011935025.1	human	United Kingdom: United Kingdom	2019
21	GCA_011935385.1	human	United Kingdom: United Kingdom	2019
22	GCA_011936045.1	human	United Kingdom: United Kingdom	2019
23	GCA_011955405.1	human	United Kingdom: United Kingdom	2019
24	GCA_011960045.1	human	United Kingdom: United Kingdom	2019
25	GCA_011966045.1	human	United Kingdom: United Kingdom	2019
26	GCA_011971075.1	human	United Kingdom: United Kingdom	2019
27	GCA_011971955.1	human	United Kingdom: United Kingdom	2019
28	GCA_011976135.1	human	United Kingdom: United Kingdom	2019
29	GCA_012006845.1	human	United Kingdom: United Kingdom	2019
30	GCA_012007225.1	human	United Kingdom: United Kingdom	2019
31	GCA_012013285.1	human	United Kingdom: United Kingdom	2019
32	GCA_012054285.1	human	United Kingdom: United Kingdom	2019
33	GCA_012192385.1	human	United Kingdom: United Kingdom	2019
34	GCA_012250085.1	human	United Kingdom: United Kingdom	2019
35	GCA_012288185.1	human	United Kingdom: United Kingdom	2019
36	GCA_012292165.1	human	United Kingdom: United Kingdom	2019
37	GCA_012307385.1	human	United Kingdom: United Kingdom	2019
38	GCA_012328955.1	fecal swab	Italy: Rome	2019
39	GCA_012331085.1	human	United Kingdom: United Kingdom	2019
40	GCA_012351225.1	human	United Kingdom: United Kingdom	2019
41	GCA_012399765.1	stool	Nigeria	2019
42	GCA_012401365.1	human	United Kingdom: United Kingdom	2019
43	GCA_012412545.1	human	United Kingdom: United Kingdom	2019
44	GCA_012417805.1	human	United Kingdom: United Kingdom	2019
45	GCA_012424235.1	stool	Nigeria	2019
46	GCA_012432655.1	stool	Nigeria	2019
47	GCA_012447205.1	stool	Nigeria	2019
48	GCA_012447465.1	human	United Kingdom: United Kingdom	2019
49	GCA_012449585.1	human	United Kingdom: United Kingdom	2019
50	GCA_012451985.1	stool	Nigeria	2019
51	GCA_012452065.1	human	United Kingdom: United Kingdom	2019
52	GCA_012452365.1	stool	Nigeria	2019
53	GCA_012452445.1	stool	Nigeria	2019
54	GCA_012453245.1	stool	Nigeria	2019
55	GCA_012453825.1	stool	Nigeria	2019
56	GCA_012453865.1	stool	Nigeria	2019
57	GCA_012454165.1	human	United Kingdom: United Kingdom	2019
58	GCA_012464725.1	human	United Kingdom: United Kingdom	2019
59	GCA_012466365.1	human	United Kingdom: United Kingdom	2019
60	GCA_012471275.1	stool	Nigeria	2019
61	GCA_012592385.1	human	United Kingdom: United Kingdom	2019
62	GCA_012592445.1	human	United Kingdom: United Kingdom	2019
63	GCA_012595165.1	human	United Kingdom: United Kingdom	2019
64	GCA_012595465.1	human	United Kingdom: United Kingdom	2019
65	GCA_012595745.1	human	United Kingdom: United Kingdom	2019
66	GCA_012596465.1	human	United Kingdom: United Kingdom	2019
67	GCA_012596915.1	human	United Kingdom: United Kingdom	2019
68	GCA_012607495.1	human	United Kingdom: United Kingdom	2019
69	GCA_012610915.1	human	United Kingdom: United Kingdom	2019
70	GCA_012612225.1	human	United Kingdom: United Kingdom	2019
71	GCA_012612965.1	human	United Kingdom: United Kingdom	2019
72	GCA_012614625.1	human	United Kingdom: United Kingdom	2019
73	GCA_012614645.1	human	United Kingdom: United Kingdom	2019
74	GCA_012616785.1	stool	Nigeria	2019
75	GCA_012616805.1	stool	Nigeria	2019
76	GCA_012616845.1	stool	Nigeria	2019
77	GCA_012616885.1	stool	Nigeria	2019
78	GCA_012617405.1	stool	Nigeria	2019
79	GCA_012617625.1	human	United Kingdom: United Kingdom	2019
80	GCA_012618225.1	stool	Nigeria	2019
81	GCA_012618325.1	stool	Nigeria	2019
82	GCA_012618485.1	stool	Nigeria	2019
83	GCA_012618565.1	stool	Nigeria	2019
84	GCA_012619285.1	human	United Kingdom: United Kingdom	2019
85	GCA_012619345.1	human	United Kingdom: United Kingdom	2019
86	GCA_012621965.1	stool	Nigeria	2019
87	GCA_012622485.1	stool	Nigeria	2019
88	GCA_012624025.1	stool	Nigeria	2019
89	GCA_012625285.1	human	United Kingdom: United Kingdom	2019
90	GCA_012644025.1	human	United Kingdom: United Kingdom	2020
91	GCA_012649305.1	human	United Kingdom: United Kingdom	2020
92	GCA_012649645.1	human	United Kingdom: United Kingdom	2020
93	GCA_012660705.1	human	United Kingdom: United Kingdom	2020
94	GCA_012663405.1	human	United Kingdom: United Kingdom	2019
95	GCA_012681305.1	human	United Kingdom: United Kingdom	2020
96	GCA_012683685.1	human	United Kingdom: United Kingdom	2020
97	GCA_012697065.1	human	United Kingdom: United Kingdom	2020
98	GCA_012701025.1	human	United Kingdom: United Kingdom	2020
99	GCA_012774075.1	human	United Kingdom: United Kingdom	2020
100	GCA_012777855.1	human	United Kingdom: United Kingdom	2020
101	GCA_012788455.1	human	United Kingdom: United Kingdom	2020
102	GCA_012789775.1	human	United Kingdom: United Kingdom	2020
103	GCA_012790935.1	human	United Kingdom: United Kingdom	2020
104	GCA_012791145.1	human	United Kingdom: United Kingdom	2020
105	GCA_012850695.1	human	United Kingdom: United Kingdom	2020
106	GCA_012852795.1	human	United Kingdom: United Kingdom	2020
107	GCA_012854855.1	human	United Kingdom: United Kingdom	2020
108	GCA_012878695.1	human	United Kingdom: United Kingdom	2019
109	GCA_012878735.1	human	United Kingdom: United Kingdom	2019
110	GCA_012879095.1	human	United Kingdom: United Kingdom	2020
111	GCA_012879685.1	human	United Kingdom: United Kingdom	2020
112	GCA_012879735.1	human	United Kingdom: United Kingdom	2019
113	GCA_012879825.1	human	United Kingdom: United Kingdom	2019
114	GCA_012880015.1	human	United Kingdom: United Kingdom	2020
115	GCA_012880295.2	human	United Kingdom: United Kingdom	2019
116	GCA_012880435.1	human	United Kingdom: United Kingdom	2019
117	GCA_012890895.1	human	United Kingdom: United Kingdom	2020
118	GCA_012902455.1	human	United Kingdom: United Kingdom	2020
119	GCA_012914905.1	human	United Kingdom: United Kingdom	2020
120	GCA_012915865.1	human	United Kingdom: United Kingdom	2020
121	GCA_012915885.1	human	United Kingdom: United Kingdom	2020
122	GCA_012921815.2	Perirectal	USA	2019
123	GCA_012925665.1	human	United Kingdom: United Kingdom	2020
124	GCA_012925705.2	rectal swab	USA	2019
125	GCA_013073565.1	stool	Egypt	2019
126	GCA_013073585.1	stool	Egypt	2019
127	GCA_013073615.1	stool	Egypt	2019
128	GCA_013073645.1	stool	Egypt	2019
129	GCA_013073655.1	stool	Egypt	2019
130	GCA_013073765.1	stool	Peru	2019
131	GCA_013073885.1	stool	Kenya	2019
132	GCA_013073925.1	stool	Kenya	2019
133	GCA_013073985.1	stool	Egypt	2019
134	GCA_013073995.1	stool	Kenya	2019
135	GCA_013074015.1	stool	Kenya	2019
136	GCA_013074055.1	stool	Egypt	2019
137	GCA_013074145.1	stool	Egypt	2019
138	GCA_013074185.1	stool	Egypt	2019
139	GCA_013074245.1	stool	Kenya	2019
140	GCA_013074265.1	stool	Kenya	2019
141	GCA_013074345.1	stool	Kenya	2019
142	GCA_013074365.1	stool	Kenya	2019
143	GCA_013155685.1	human	United Kingdom: United Kingdom	2020
144	GCA_013390695.1	hospital	South Korea: Seoul	2019
145	GCA_013392245.1	rectal swab	Switzerland	2019
146	GCA_013392305.1	rectal swab	Switzerland	2019
147	GCA_013392655.1	rectal swab	Switzerland	2019
148	GCA_013395255.1	rectal swab	Switzerland	2019
149	GCA_013395265.1	rectal swab	Switzerland	2019
150	GCA_013395335.1	rectal swab	Switzerland	2019
151	GCA_013395455.1	rectal swab	Switzerland	2019
152	GCA_013395535.1	rectal swab	Tanzania	2019
153	GCA_013395605.1	rectal swab	Switzerland	2019
154	GCA_013395625.1	rectal swab	Switzerland	2019
155	GCA_013395655.1	rectal swab	Switzerland	2019
156	GCA_013395835.1	rectal swab	Switzerland	2019
157	GCA_013402855.1	urinary tract	Australia	2019
158	GCA_013412815.1	feces	Belgium	2019
159	GCA_013425955.1	blood	China: Yueqing	2019
160	GCA_013451535.1	human	United Kingdom: United Kingdom	2020
161	GCA_013674715.1	human	United Kingdom: United Kingdom	2020
162	GCA_013680285.1	human	United Kingdom: United Kingdom	2020
163	GCA_013716405.2	urine	USA	2019
164	GCA_013777945.1	human	United Kingdom: United Kingdom	2020
165	GCA_013982715.1	human	United Kingdom: United Kingdom	2020
166	GCA_014089645.1	human	United Kingdom: United Kingdom	2020
167	GCA_014165135.1	human	United Kingdom: United Kingdom	2020
168	GCA_014169995.1	Rectal swab	USA:Maine	2019
169	GCA_014213275.1	human	United Kingdom: United Kingdom	2020
170	GCA_014219545.1	Unknown	China	2019
171	GCA_014290265.1	human	United Kingdom: United Kingdom	2020
172	GCA_014291135.1	human	United Kingdom: United Kingdom	2020
173	GCA_014343515.1	human	United Kingdom: United Kingdom	2020
174	GCA_014347675.1	human	United Kingdom: United Kingdom	2020
175	GCA_014352735.1	human	United Kingdom: United Kingdom	2020
176	GCA_014352755.1	human	United Kingdom: United Kingdom	2020
177	GCA_014354975.1	human	United Kingdom: United Kingdom	2020
178	GCA_014394805.1	human	United Kingdom: United Kingdom	2020
179	GCA_014394865.1	human	United Kingdom: United Kingdom	2020
180	GCA_014494055.1	blood	India: Aurangabad	2019
181	GCA_014494275.1	Fluid	India: Vellore	2019
182	GCA_014494315.1	blood	India: Aurangabad	2019
183	GCA_014494415.1	Fluid	India: Vellore	2019
184	GCA_014495085.1	blood	India: Vellore	2019
185	GCA_014495335.1	blood	India: Vellore	2019
186	GCA_014495625.1	blood	India: Vellore	2019
187	GCA_014506525.1	human	United Kingdom: United Kingdom	2020
188	GCA_014507765.1	human	United Kingdom: United Kingdom	2020
189	GCA_014507905.1	human	United Kingdom: United Kingdom	2020
190	GCA_014508125.1	human	United Kingdom: United Kingdom	2020
191	GCA_014508145.1	human	United Kingdom: United Kingdom	2020
192	GCA_014508165.1	human	United Kingdom: United Kingdom	2020
193	GCA_014533075.1	human	United Kingdom: United Kingdom	2020
194	GCA_014536205.1	human	United Kingdom: United Kingdom	2020
195	GCA_014543945.1	human	United Kingdom: United Kingdom	2020
196	GCA_014545105.1	human	United Kingdom: United Kingdom	2020
197	GCA_014546335.1	human	United Kingdom: United Kingdom	2020
198	GCA_014546485.1	human	United Kingdom: United Kingdom	2020
199	GCA_014546645.1	human	United Kingdom: United Kingdom	2020
200	GCA_014546705.1	human	United Kingdom: United Kingdom	2020
201	GCA_014656625.1	feces	Australia	2020
202	GCA_014663975.1	human	United Kingdom: United Kingdom	2020
203	GCA_014664015.1	human	United Kingdom: United Kingdom	2020
204	GCA_014684125.1	human	United Kingdom: United Kingdom	2020
205	GCA_014766735.1	human	United Kingdom: United Kingdom	2020
206	GCA_014775235.1	rectal swab	Pakistan	2019
207	GCA_014775555.1	rectal swab	Pakistan	2019
208	GCA_014793925.1	rectal swab	Pakistan	2019
209	GCA_014862505.1	Unknown	France	2019
210	GCA_014862545.1	Unknown	France	2019
211	GCA_014862585.1	Unknown	France	2019
212	GCA_014862685.1	Unknown	France	2019
213	GCA_014888235.1	human	United Kingdom: United Kingdom	2020
214	GCA_014888355.1	human	United Kingdom: United Kingdom	2020
215	GCA_014888395.1	human	United Kingdom: United Kingdom	2020
216	GCA_014888435.1	human	United Kingdom: United Kingdom	2020
217	GCA_014888655.1	human	United Kingdom: United Kingdom	2020
218	GCA_014906945.1	human	United Kingdom: United Kingdom	2020
219	GCA_014906965.1	human	United Kingdom: United Kingdom	2020
220	GCA_014914695.1	human	United Kingdom: United Kingdom	2020
221	GCA_014915315.1	human	United Kingdom: United Kingdom	2020
222	GCA_014952445.1	human	United Kingdom: United Kingdom	2020
223	GCA_014959525.1	human	United Kingdom: United Kingdom	2020
224	GCA_014970405.1	human	United Kingdom: United Kingdom	2020
225	GCA_014977565.1	human	United Kingdom: United Kingdom	2020
226	GCA_014977705.1	human	United Kingdom: United Kingdom	2020
227	GCA_014978025.1	human	United Kingdom: United Kingdom	2020
228	GCA_014978065.1	human	United Kingdom: United Kingdom	2020
229	GCA_014978225.1	human	United Kingdom: United Kingdom	2020
230	GCA_014982545.1	stool	Spain	2019
231	GCA_015123635.1	human	United Kingdom: United Kingdom	2019
232	GCA_015127825.1	human	United Kingdom: United Kingdom	2020
233	GCA_015134475.1	human	United Kingdom: United Kingdom	2019
234	GCA_015134495.1	human	United Kingdom: United Kingdom	2019
235	GCA_015135295.1	human	United Kingdom: United Kingdom	2019
236	GCA_015136105.1	human	United Kingdom: United Kingdom	2019
237	GCA_015136355.1	human	United Kingdom: United Kingdom	2019
238	GCA_015137895.1	human	United Kingdom: United Kingdom	2019
239	GCA_015138355.1	human	United Kingdom: United Kingdom	2019
240	GCA_015138655.1	human	United Kingdom: United Kingdom	2019
241	GCA_015139255.1	human	United Kingdom: United Kingdom	2019
242	GCA_015139755.1	human	United Kingdom: United Kingdom	2019
243	GCA_015140465.1	human	United Kingdom: United Kingdom	2019
244	GCA_015153475.1	human	United Kingdom: United Kingdom	2020
245	GCA_015154095.1	human	United Kingdom: United Kingdom	2020
246	GCA_015154235.1	human	United Kingdom: United Kingdom	2020
247	GCA_015154255.1	human	United Kingdom: United Kingdom	2020
248	GCA_015154475.1	human	United Kingdom: United Kingdom	2020
249	GCA_015154775.1	human	United Kingdom: United Kingdom	2020
250	GCA_015283025.1	urine	Nigeria	2019
251	GCA_015283065.1	urine	Nigeria	2020
252	GCA_015283075.1	aspirate	Nigeria	2020
253	GCA_015283585.1	urine	Nigeria	2019
254	GCA_015283685.1	urine	Nigeria	2019
255	GCA_015283925.1	wound swab	Nigeria	2020
256	GCA_015284145.1	blood	Nigeria	2019
257	GCA_015284325.1	endocervical	Nigeria	2020
258	GCA_015285665.1	urine	Nigeria	2019
259	GCA_015285885.1	blood	Nigeria	2020
260	GCA_015300965.1	human	United Kingdom: United Kingdom	2020
261	GCA_015325405.1	human	United Kingdom: United Kingdom	2019
262	GCA_015371985.2	urine	USA	2020
263	GCA_015561725.1	human	United Kingdom: United Kingdom	2020
264	GCA_015622305.2	blood isolate	USA	2019
265	GCA_015696445.1	human	United Kingdom: United Kingdom	2020
266	GCA_015697025.2	urine isolate	USA	2020
267	GCA_015700915.1	not collected	USA: Pittsburgh, Pennsylvania	2019
268	GCA_015712395.1	Unknown	China	2019
269	GCA_015712405.1	Unknown	China	2019
270	GCA_015730325.1	rectal swab	USA	2020
271	GCA_015861965.1	Unknown	USA	2019
272	GCA_015862005.2	stool isolate	USA	2019
273	GCA_015886945.1	stool isolate	USA	2019
274	GCA_015887725.2	rectal swab isolate	USA	2019
275	GCA_015905175.1	Unknown	Nigeria: Awka, Anambra State	2019
276	GCA_016092395.1	non-complicated Urinary tract infection-ER	Colombia:Duitama	2019
277	GCA_016092445.1	non-complicated Urinary tract infection-Hospitalization	Colombia:Duitama	2019
278	GCA_016119325.1	human	United Kingdom: United Kingdom	2020
279	GCA_016131425.1	human	United Kingdom: United Kingdom	2020
280	GCA_016131945.1	human	United Kingdom: United Kingdom	2020
281	GCA_016241995.1	human	United Kingdom: United Kingdom	2020
282	GCA_016313925.1	human	United Kingdom: United Kingdom	2020
283	GCA_016386775.1	urine	USA: Pittsburgh, Pennsylvania	2019
284	GCA_016387225.1	urine	USA: Pittsburgh, Pennsylvania	2019
285	GCA_016390925.1	wound	USA: Pittsburgh, Pennsylvania	2019
286	GCA_016391175.1	blood	USA: Pittsburgh, Pennsylvania	2019
287	GCA_016404145.1	stool	Switzerland: Zurich	2019
288	GCA_016404165.2	stool	Switzerland: Zurich	2019
289	GCA_016404245.1	stool	Switzerland: Zurich	2019
290	GCA_016404325.2	stool	Switzerland: Zurich	2019
291	GCA_016482975.1	Rectal swab	Germany	2019
292	GCA_016483015.1	Colonstomy swab	Switzerland	2019
293	GCA_016483025.1	Rectal swab	Switzerland	2019
294	GCA_016483115.1	Rectal swab	Germany	2019
295	GCA_016598635.1	Unknown	China:Changchun	2019
296	GCA_016760575.1	Other body fluids	Bangladesh	2019
297	GCA_016760605.1	Other body fluids	Bangladesh	2019
298	GCA_016760775.1	Other body fluids	Bangladesh	2019
299	GCA_016775965.1	Unknown	Netherlands	2019
300	GCA_016776005.1	Unknown	Netherlands	2019
301	GCA_016776325.1	Unknown	Netherlands	2019
302	GCA_016776345.1	Unknown	Netherlands	2019
303	GCA_016776365.1	Unknown	Netherlands	2019
304	GCA_016776385.1	Unknown	Netherlands	2019
305	GCA_016791725.1	rectal swab	Switzerland	2019
306	GCA_016801475.1	Unknown	Netherlands	2019
307	GCA_016843585.1	human	United Kingdom: United Kingdom	2020
308	GCA_016858085.1	human	United Kingdom: United Kingdom	2021
309	GCA_016905725.1	urine (permanent catheter)	Czech Republic: Praha	2019
310	GCA_016954575.1	human	United Kingdom: United Kingdom	2021
311	GCA_016991555.1	urine	Brazil: Londrina	2019
312	GCA_016991615.1	urine	Brazil: Londrina	2019
313	GCA_017008895.1	human	United Kingdom: United Kingdom	2021
314	GCA_017032815.1	human	United Kingdom: United Kingdom	2021
315	GCA_017032835.1	human	United Kingdom: United Kingdom	2021
316	GCA_017052915.1	blood	Qatar:Doha	2019
317	GCA_017088405.1	feces	Singapore	2019
318	GCA_017088425.1	feces	Singapore	2019
319	GCA_017088445.1	feces	Singapore	2019
320	GCA_017088465.1	feces	Singapore	2019
321	GCA_017134495.1	Rectal swab	Qatar:Doha	2019
322	GCA_017134875.1	Rectal swab	Qatar:Doha	2019
323	GCA_017134955.1	Rectal swab	Qatar:Doha	2019
324	GCA_017164195.1	feces	Singapore	2019
325	GCA_017164215.1	feces	Singapore	2019
326	GCA_017164225.1	feces	Singapore	2019
327	GCA_017164255.1	feces	Singapore	2019
328	GCA_017164265.1	feces	Singapore	2019
329	GCA_017164315.1	feces	Singapore	2019
330	GCA_017164335.1	feces	Singapore	2019
331	GCA_017164395.1	feces	Singapore	2019
332	GCA_017164405.1	feces	Singapore	2019
333	GCA_017164475.1	feces	Singapore	2019
334	GCA_017164485.1	feces	Singapore	2019
335	GCA_017164535.1	feces	Singapore	2019
336	GCA_017164695.1	feces	Singapore	2019
337	GCA_017180835.1	human	United Kingdom: United Kingdom	2021
338	GCA_017180915.1	human	United Kingdom: United Kingdom	2021
339	GCA_017235475.1	human	United Kingdom: United Kingdom	2021
340	GCA_017235495.1	human	United Kingdom: United Kingdom	2021
341	GCA_017263955.1	human	United Kingdom: United Kingdom	2021
342	GCA_017300895.1	human	United Kingdom: United Kingdom	2021
343	GCA_017353385.1	rectal swab	Brazil	2020
344	GCA_017678285.1	human	United Kingdom: United Kingdom	2021
345	GCA_017678325.1	human	United Kingdom: United Kingdom	2021
346	GCA_017678365.1	human	United Kingdom: United Kingdom	2021
347	GCA_017717715.1	human	United Kingdom: United Kingdom	2021
348	GCA_017717815.1	human	United Kingdom: United Kingdom	2021
349	GCA_017727255.1	human	United Kingdom: United Kingdom	2021
350	GCA_017727275.1	human	United Kingdom: United Kingdom	2021
351	GCA_017739095.1	human	United Kingdom: United Kingdom	2021
352	GCA_017757945.1	human	United Kingdom: United Kingdom	2021
353	GCA_017758085.1	human	United Kingdom: United Kingdom	2021
354	GCA_017903455.1	Urine sample	Pakistan: Faisalabad	2019
355	GCA_017906335.3	urine	USA	2021
356	GCA_017981045.1	urine	Nigeria	2019
357	GCA_018024375.1	Rectal swab	Qatar:Doha	2019
358	GCA_018024635.2	Urine specimen obtained by clean catch procedure	USA	2020
359	GCA_018035665.1	human	United Kingdom: United Kingdom	2020
360	GCA_018038185.1	blood	Nigeria	2020
361	GCA_018042345.1	human	United Kingdom: United Kingdom	2020
362	GCA_018046885.1	rectal swab	Pakistan	2019
363	GCA_018051225.1	human	United Kingdom: United Kingdom	2020
364	GCA_018051485.1	human	United Kingdom: United Kingdom	2020
365	GCA_018071645.1	human	United Kingdom: United Kingdom	2020
366	GCA_018071665.1	human	United Kingdom: United Kingdom	2020
367	GCA_018071705.1	human	United Kingdom: United Kingdom	2020
368	GCA_018117985.1	urine	Qatar:Doha	2020
369	GCA_018118125.1	Rectal swab	Qatar:Doha	2020
370	GCA_018118165.1	Rectal swab	Qatar:Doha	2020
371	GCA_018128405.1	rectal swab	Switzerland	2020
372	GCA_018168875.2	urine	USA	2021
373	GCA_018263975.1	urinary catheter	Egypt: Alexandria	2019
374	GCA_018287915.2	Urine specimen obtained by clean catch procedure	USA	2021
375	GCA_018310935.1	human	United Kingdom: United Kingdom	2021
376	GCA_018311035.1	human	United Kingdom: United Kingdom	2021
377	GCA_018390995.1	human	United Kingdom: United Kingdom	2021
378	GCA_018391035.1	human	United Kingdom: United Kingdom	2021
379	GCA_018421395.1	Nose throat swab	Germany	2019
380	GCA_018422855.1	Rectal swab/stool	Germany	2019
381	GCA_018446595.2	Rectal swab/stool	Germany	2019
382	GCA_018452185.2	Unknown	USA	2021
383	GCA_018477205.1	human	United Kingdom: United Kingdom	2021
384	GCA_018499805.2	urine from a woman with pelvic cancer	China: Fujian province	2020
385	GCA_018839035.1	human	United Kingdom: United Kingdom	2021
386	GCA_018922545.1	hospital	Germany	2019
387	GCA_018922755.1	hospital	Germany	2019
388	GCA_018923745.1	hospital	Germany	2019
389	GCA_018923865.1	hospital	Germany	2019
390	GCA_018923885.1	hospital	Germany	2019
391	GCA_018927075.1	human	United Kingdom: United Kingdom	2021
392	GCA_018954935.1	blood	USA	2020
393	GCA_018979065.1	human	United Kingdom: United Kingdom	2021
394	GCA_019050515.1	sputum	China: Xuzhou	2019
395	GCA_019054085.1	urine	China: Xuzhou	2019
396	GCA_019054975.1	human	United Kingdom: United Kingdom	2021
397	GCA_019105405.1	human	United Kingdom: United Kingdom	2021
398	GCA_019107125.1	human	United Kingdom: United Kingdom	2021
399	GCA_019148725.1	purulent secretion	China: Conghua	2020
400	GCA_019148805.1	urine	China: Conghua	2020
401	GCA_019148825.1	urine	China: Conghua	2020
402	GCA_019148895.1	urine	China: Conghua	2020
403	GCA_019148925.1	urine	China: Conghua	2020
404	GCA_019164515.1	clinical	New Zealand	2019
405	GCA_019181785.1	human	United Kingdom: United Kingdom	2021
406	GCA_019196575.1	human	United Kingdom: United Kingdom	2021
407	GCA_019201685.1	Pelvic secretion	Brazil: Florianopolis	2019
408	GCA_019227745.1	urine	Australia	2019
409	GCA_019228065.1	swab	Australia	2019
410	GCA_019228945.1	swab	Australia	2019
411	GCA_019229625.1	feces	Australia	2020
412	GCA_019259005.2	Rectal swab	USA	2021
413	GCA_019269075.1	human	United Kingdom: United Kingdom	2021
414	GCA_019271635.2	urine	USA	2021
415	GCA_019273365.1	human	United Kingdom: United Kingdom	2021
416	GCA_019281405.1	Unknown	USA: Maine	2019
417	GCA_019281455.1	Unknown	USA: Maine	2019
418	GCA_019282315.1	Unknown	USA: Maine	2020
419	GCA_019282675.1	Unknown	USA: Maine	2020
420	GCA_019311855.1	urine	Russia: Moscow	2019
421	GCA_019311925.1	urine	Russia: Moscow	2019
422	GCA_019328005.1	human faeces	Netherlands	2019
423	GCA_019328105.1	human faeces	Netherlands	2019
424	GCA_019435485.1	human	United Kingdom: United Kingdom	2021
425	GCA_019461555.1	human	United Kingdom: United Kingdom	2021
426	GCA_019462035.1	human	United Kingdom: United Kingdom	2021
427	GCA_019468125.1	human	United Kingdom: United Kingdom	2019
428	GCA_019468845.1	human	United Kingdom: United Kingdom	2019
429	GCA_019469305.1	human	United Kingdom: United Kingdom	2021
430	GCA_019469745.1	human	United Kingdom: United Kingdom	2019
431	GCA_019470225.1	human	United Kingdom: United Kingdom	2019
432	GCA_019470265.1	human	United Kingdom: United Kingdom	2019
433	GCA_019470325.1	human	United Kingdom: United Kingdom	2019
434	GCA_019470405.1	human	United Kingdom: United Kingdom	2019
435	GCA_019470465.1	human	United Kingdom: United Kingdom	2019
436	GCA_019470805.1	human	United Kingdom: United Kingdom	2019
437	GCA_019471165.1	human	United Kingdom: United Kingdom	2019
438	GCA_019472185.1	human	United Kingdom: United Kingdom	2019
439	GCA_019472225.1	human	United Kingdom: United Kingdom	2019
440	GCA_019472295.1	human	United Kingdom: United Kingdom	2019
441	GCA_019477505.1	human	United Kingdom: United Kingdom	2019
442	GCA_019477885.1	human	United Kingdom: United Kingdom	2019
443	GCA_019478765.2	human	United Kingdom: United Kingdom	2019
444	GCA_019479025.1	human	United Kingdom: United Kingdom	2019
445	GCA_019479625.1	human	United Kingdom: United Kingdom	2019
446	GCA_019479745.1	human	United Kingdom: United Kingdom	2019
447	GCA_019480505.1	human	United Kingdom: United Kingdom	2019
448	GCA_019480965.1	human	United Kingdom: United Kingdom	2019
449	GCA_019482985.1	human	United Kingdom: United Kingdom	2019
450	GCA_019484035.1	human	United Kingdom: United Kingdom	2019
451	GCA_019484325.1	human	United Kingdom: United Kingdom	2019
452	GCA_019489865.1	human	United Kingdom: United Kingdom	2021
453	GCA_019492485.1	human	United Kingdom: United Kingdom	2019
454	GCA_019500465.1	human	United Kingdom: United Kingdom	2019
455	GCA_019502985.1	human	United Kingdom: United Kingdom	2021
456	GCA_019509145.1	human	United Kingdom: United Kingdom	2019
457	GCA_019512185.1	human	United Kingdom: United Kingdom	2019
458	GCA_019513165.1	human	United Kingdom: United Kingdom	2019
459	GCA_019521745.1	human	United Kingdom: United Kingdom	2019
460	GCA_019523105.1	human	United Kingdom: United Kingdom	2019
461	GCA_019523125.1	human	United Kingdom: United Kingdom	2019
462	GCA_019523545.1	human	United Kingdom: United Kingdom	2019
463	GCA_019529675.1	human	United Kingdom: United Kingdom	2021
464	GCA_019533075.1	human	United Kingdom: United Kingdom	2021
465	GCA_019536635.1	human	United Kingdom: United Kingdom	2021
466	GCA_019538295.1	human	United Kingdom: United Kingdom	2020
467	GCA_019574775.1	human	United Kingdom: United Kingdom	2019
468	GCA_019614825.1	outbreaks of food poisoning	China: Guangxi	2019
469	GCA_019659245.2	urine	USA	2021
470	GCA_019668005.1	human	United Kingdom: United Kingdom	2021
471	GCA_019710415.1	Child feces	China:zhejiang	2021
472	GCA_019730435.1	feces	China	2020
473	GCA_019730785.1	feces	China	2020
474	GCA_019730975.1	feces	China	2020
475	GCA_019731255.1	feces	China	2020
476	GCA_019731455.1	feces	China	2020
477	GCA_019781205.1	rectal swab	Germany: Heidelberg	2019
478	GCA_019879125.1	stool	China:Guangzhou City, Guangdong Province	2019
479	GCA_019879155.1	stool	China:Guangzhou City, Guangdong Province	2019
480	GCA_019879205.1	stool	China:Guangzhou City, Guangdong Province	2019
481	GCA_019879245.1	stool	China:Guangzhou City, Guangdong Province	2019
482	GCA_019879285.1	stool	China:Guangzhou City, Guangdong Province	2019
483	GCA_019879295.1	stool	China:Guangzhou City, Guangdong Province	2019
484	GCA_019879365.1	stool	China:Guangzhou City, Guangdong Province	2019
485	GCA_019879385.1	stool	China:Guangzhou City, Guangdong Province	2019
486	GCA_019879405.1	stool	China:Guangzhou City, Guangdong Province	2019
487	GCA_019879445.1	stool	China:Guangzhou City, Guangdong Province	2019
488	GCA_019879465.1	stool	China:Guangzhou City, Guangdong Province	2019
489	GCA_019879485.1	stool	China:Guangzhou City, Guangdong Province	2019
490	GCA_019879535.1	stool	China:Guangzhou City, Guangdong Province	2019
491	GCA_019879605.1	stool	China:Guangzhou City, Guangdong Province	2019
492	GCA_019879625.1	stool	China:Guangzhou City, Guangdong Province	2019
493	GCA_019879645.1	stool	China:Guangzhou City, Guangdong Province	2019
494	GCA_019879685.1	stool	China:Guangzhou City, Guangdong Province	2019
495	GCA_019879705.1	stool	China:Guangzhou City, Guangdong Province	2019
496	GCA_019879735.1	stool	China:Guangzhou City, Guangdong Province	2019
497	GCA_019879765.1	stool	China:Guangzhou City, Guangdong Province	2019
498	GCA_019879785.1	stool	China:Guangzhou City, Guangdong Province	2019
499	GCA_019879845.1	stool	China:Guangzhou City, Guangdong Province	2019
500	GCA_019879945.1	stool	China:Guangzhou City, Guangdong Province	2019
501	GCA_019879965.1	stool	China:Guangzhou City, Guangdong Province	2019
502	GCA_019880005.1	stool	China:Guangzhou City, Guangdong Province	2019
503	GCA_019880045.1	stool	China:Guangzhou City, Guangdong Province	2019
504	GCA_019880095.1	stool	China:Guangzhou City, Guangdong Province	2019
505	GCA_019915525.1	Swab from Wound	Kazakhstan: Almaty	2021
506	GCA_019926805.1	bile	China:Zhengzhou	2019
507	GCA_019926865.1	urine	China:Zhengzhou	2019
508	GCA_019937735.1	human	United Kingdom: United Kingdom	2021
509	GCA_019937775.1	human	United Kingdom: United Kingdom	2021
510	GCA_019939135.1	human	United Kingdom: United Kingdom	2021
511	GCA_019939655.1	human	United Kingdom: United Kingdom	2021
512	GCA_019939675.1	human	United Kingdom: United Kingdom	2021
513	GCA_019940075.1	human	United Kingdom: United Kingdom	2021
514	GCA_019940395.1	human	United Kingdom: United Kingdom	2021
515	GCA_019940555.1	human	United Kingdom: United Kingdom	2021
516	GCA_019940815.1	human	United Kingdom: United Kingdom	2021
517	GCA_019941575.1	human	United Kingdom: United Kingdom	2021
518	GCA_019941895.1	human	United Kingdom: United Kingdom	2021
519	GCA_019950715.1	human	United Kingdom: United Kingdom	2021
520	GCA_020019455.1	human	United Kingdom: United Kingdom	2021
521	GCA_020097675.1	human	United Kingdom: United Kingdom	2021
522	GCA_020149465.1	urine	Switzerland: Basel	2020
523	GCA_020149625.1	urine	USA: Baltimore	2020
524	GCA_020149665.1	blood	USA: Baltimore	2020
525	GCA_020168175.1	patient with infection	China: Beijing	2019
526	GCA_020168575.1	patient with infection	China: Shandong	2019
527	GCA_020175835.1	human	United Kingdom: United Kingdom	2021
528	GCA_020182895.1	human	United Kingdom: United Kingdom	2021
529	GCA_020190405.1	Unknown	Unknown	2020
530	GCA_020251725.1	not collected	China: Beijing city	2020
531	GCA_020259745.1	human	United Kingdom: United Kingdom	2021
532	GCA_020272545.1	human	United Kingdom: United Kingdom	2020
533	GCA_020283985.1	human	United Kingdom: United Kingdom	2020
534	GCA_020288425.1	human	United Kingdom: United Kingdom	2020
535	GCA_020288565.1	human	United Kingdom: United Kingdom	2020
536	GCA_020290605.1	human	United Kingdom: United Kingdom	2021
537	GCA_020291285.1	human	United Kingdom: United Kingdom	2021
538	GCA_020298685.1	human	United Kingdom: United Kingdom	2020
539	GCA_020298785.2	human	United Kingdom: United Kingdom	2019
540	GCA_020307225.1	human	United Kingdom: United Kingdom	2019
541	GCA_020316335.1	human	United Kingdom: United Kingdom	2019
542	GCA_020321475.1	human	United Kingdom: United Kingdom	2021
543	GCA_020357405.1	human	United Kingdom: United Kingdom	2021
544	GCA_020409965.1	human	United Kingdom: United Kingdom	2021
545	GCA_020424045.1	Unknown	China: Beijing	2020
546	GCA_020462945.1	human	United Kingdom: United Kingdom	2021
547	GCA_020463345.1	human	United Kingdom: United Kingdom	2021
548	GCA_020470465.1	human	United Kingdom: United Kingdom	2021
549	GCA_020519625.1	urine	USA	2021
550	GCA_020535205.1	urine	China: Jinhua	2019
551	GCA_020540945.1	rectal swab	United Kingdom	2020
552	GCA_020551445.1	human	United Kingdom: United Kingdom	2021
553	GCA_020564915.1	Rectal swab	Thailand: Roi Et	2020
554	GCA_020612675.1	human	United Kingdom: United Kingdom	2021
555	GCA_020616495.1	Unknown	China: Wenzhou	2019
556	GCA_020661725.1	human	United Kingdom: United Kingdom	2021
557	GCA_020673355.2	Unknown	USA	2021
558	GCA_020678965.1	human	United Kingdom: United Kingdom	2021
559	GCA_020679425.1	human	United Kingdom: United Kingdom	2021
560	GCA_020716665.1	Unknown	Unknown	2021
561	GCA_020801815.1	human	United Kingdom: United Kingdom	2021
562	GCA_020827555.1	blood	Taiwan	2019
563	GCA_020827575.1	blood	Taiwan	2019
564	GCA_020827595.1	blood	Taiwan	2019
565	GCA_020827615.1	blood	Taiwan	2019
566	GCA_020827635.1	blood	Taiwan	2019
567	GCA_020827655.1	blood	Taiwan	2019
568	GCA_020827895.1	blood	Taiwan	2019
569	GCA_020829045.1	blood	Taiwan	2019
570	GCA_020843205.1	human	United Kingdom: United Kingdom	2021
571	GCA_020843365.1	human	United Kingdom: United Kingdom	2021
572	GCA_020843785.1	human	United Kingdom: United Kingdom	2021
573	GCA_020858625.1	Unknown	USA	2019
574	GCA_020874335.1	human	United Kingdom: United Kingdom	2021
575	GCA_020875215.1	human	United Kingdom: United Kingdom	2021
576	GCA_020876335.1	human	United Kingdom: United Kingdom	2021
577	GCA_020876535.1	human	United Kingdom: United Kingdom	2021
578	GCA_020877175.1	human	United Kingdom: United Kingdom	2021
579	GCA_020877875.1	human	United Kingdom: United Kingdom	2021
580	GCA_020883295.1	Unknown	Netherlands	2020
581	GCA_020910885.1	human	United Kingdom: United Kingdom	2021
582	GCA_020986345.1	human	United Kingdom: United Kingdom	2021
583	GCA_020993405.1	human	United Kingdom: United Kingdom	2021
584	GCA_020996195.1	human	United Kingdom: United Kingdom	2021
585	GCA_020996335.1	human	United Kingdom: United Kingdom	2021
586	GCA_021027875.1	Urine specimen	USA	2021
587	GCA_021027955.2	Rectal swab	USA	2021
588	GCA_021028215.2	Perianal swab	USA	2021
589	GCA_021047005.1	Faeces or rectal swab	United Kingdom:Birmingham	2019
590	GCA_021047205.1	Faeces or rectal swab	United Kingdom:Birmingham	2019
591	GCA_021047505.1	Faeces or rectal swab	United Kingdom:Birmingham	2019
592	GCA_021047605.1	Faeces or rectal swab	United Kingdom:Birmingham	2019
593	GCA_021047885.1	Faeces or rectal swab	United Kingdom:Birmingham	2019
594	GCA_021049025.1	human	United Kingdom: United Kingdom	2021
595	GCA_021051225.1	human	United Kingdom: United Kingdom	2021
596	GCA_021083205.1	Unknown	China: Wenzhou	2019
597	GCA_021088185.1	Unknown	Italy	2019
598	GCA_021089025.1	human	United Kingdom: United Kingdom	2021
599	GCA_021145605.1	Unknown	Japan:Hiroshima	2020
600	GCA_021146165.1	Unknown	Japan:Hiroshima	2020
601	GCA_021222425.2	Rectal Swab	USA	2021
602	GCA_021232155.1	human	United Kingdom: United Kingdom	2021
603	GCA_021252205.1	human	United Kingdom: United Kingdom	2021
604	GCA_021253325.1	human	United Kingdom: United Kingdom	2021
605	GCA_021273345.1	blood	USA	2021
606	GCA_021289775.1	human	United Kingdom: United Kingdom	2021
607	GCA_021290245.1	human	United Kingdom: United Kingdom	2021
608	GCA_021295535.1	vaginal swab	Portugal	2019
609	GCA_021302695.1	Unknown	Italy	2019
610	GCA_021336755.1	Rectal Swab	USA	2021
611	GCA_021342075.1	anal swab	China	2020
612	GCA_021342135.1	anal swab	China	2020
613	GCA_021342175.1	anal swab	China	2020
614	GCA_021342505.1	anal swab	China	2020
615	GCA_021342715.1	anal swab	China	2020
616	GCA_021342995.1	anal swab	China	2020
617	GCA_021343355.1	anal swab	China	2020
618	GCA_021343375.1	anal swab	China	2020
619	GCA_021345845.1	human	United Kingdom: United Kingdom	2021
620	GCA_021346445.1	human	United Kingdom: United Kingdom	2021
621	GCA_021370455.1	Unknown	Switzerland	2019
622	GCA_021370475.1	Unknown	Switzerland	2019
623	GCA_021370535.1	Unknown	Switzerland	2020
624	GCA_021372195.1	Unknown	Switzerland	2020
625	GCA_021373275.1	Unknown	Switzerland	2020
626	GCA_021378315.1	stool	South Korea:Seoul	2020
627	GCA_021397775.1	anal swab	China	2020
628	GCA_021398095.1	Unknown	China	2020
629	GCA_021398195.1	Unknown	China	2020
630	GCA_021398675.1	Unknown	China	2020
631	GCA_021398775.1	Unknown	China	2020
632	GCA_021398795.1	Unknown	China	2020
633	GCA_021398875.1	Unknown	China	2020
634	GCA_021419225.1	hospital	Germany	2020
635	GCA_021419505.1	hospital	Germany	2020
636	GCA_021433585.1	human	United Kingdom: United Kingdom	2021
637	GCA_021433905.1	human	United Kingdom: United Kingdom	2021
638	GCA_021441985.1	Pus	China: Hangzhou	2021
639	GCA_021460725.1	Unknown	Thailand	2020
640	GCA_021460845.1	Unknown	Niger	2020
641	GCA_021460905.1	Unknown	Thailand	2020
642	GCA_021460935.1	Unknown	Thailand	2020
643	GCA_021461045.1	Unknown	Niger	2020
644	GCA_021483205.1	Unknown	Israel: Tel-Aviv	2019
645	GCA_021483325.1	Unknown	Israel: Tel-Aviv	2019
646	GCA_021483365.1	Unknown	Israel: Tel-Aviv	2019
647	GCA_021483385.1	Unknown	Israel: Tel-Aviv	2019
648	GCA_021492385.3	rectal swab	USA	2021
649	GCA_021492665.1	human	United Kingdom: United Kingdom	2022
650	GCA_021492705.1	human	United Kingdom: United Kingdom	2022
651	GCA_021525195.1	Unknown	USA	2021
652	GCA_021537395.1	human	United Kingdom: United Kingdom	2022
653	GCA_021547535.1	intestinal tract	Austria	2020
654	GCA_021547575.1	intestinal tract	Austria	2020
655	GCA_021547595.1	intestinal tract	Austria	2020
656	GCA_021547635.1	intestinal tract	Austria	2020
657	GCA_021547665.1	intestinal tract	Austria	2020
658	GCA_021547825.1	intestinal tract	Austria	2020
659	GCA_021547975.1	intestinal tract	Austria	2020
660	GCA_021547995.1	intestinal tract	Austria	2020
661	GCA_021548155.1	intestinal tract	Austria	2019
662	GCA_021552295.1	blood	China: Guangdong	2019
663	GCA_021559355.1	human	United Kingdom: United Kingdom	2022
664	GCA_021561815.1	human	United Kingdom: United Kingdom	2022
665	GCA_021562835.1	human	United Kingdom: United Kingdom	2022
666	GCA_021655655.1	blood	Taiwan	2019
667	GCA_021723755.1	human	United Kingdom: United Kingdom	2022
668	GCA_021892075.1	urine	Sudan	2020
669	GCA_021913565.1	urine	India: New Delhi	2019
670	GCA_021944255.3	urine	USA	2022
671	GCA_022015565.1	urine	India	2020
672	GCA_022015655.1	urine	India	2020
673	GCA_022015675.1	urine	India	2020
674	GCA_022015685.1	urine	India	2020
675	GCA_022015735.1	urine	India	2020
676	GCA_022015815.1	urine	India	2020
677	GCA_022018615.1	human	United Kingdom: United Kingdom	2022
678	GCA_022018635.1	human	United Kingdom: United Kingdom	2022
679	GCA_022018995.1	human	United Kingdom: United Kingdom	2022
680	GCA_022020815.1	human	United Kingdom: United Kingdom	2022
681	GCA_022029995.1	blood	India	2019
682	GCA_022030015.1	blood	India	2020
683	GCA_022030035.1	blood	India	2020
684	GCA_022030175.1	human	United Kingdom: United Kingdom	2022
685	GCA_022030435.1	human	United Kingdom: United Kingdom	2022
686	GCA_022031155.1	human	United Kingdom: United Kingdom	2022
687	GCA_022031775.1	human	United Kingdom: United Kingdom	2022
688	GCA_022111715.1	urine	Netherlands	2019
689	GCA_022113395.1	Rectum swab	Netherlands	2019
690	GCA_022113635.1	Rectum swab	Netherlands	2019
691	GCA_022114775.1	Rectum swab	Netherlands	2019
692	GCA_022114915.1	urine	Netherlands	2020
693	GCA_022116015.1	urine	Netherlands	2019
694	GCA_022116575.1	Perineum swab	Netherlands	2020
695	GCA_022120605.1	Rectum swab	Netherlands	2019
696	GCA_022222185.1	human	United Kingdom: United Kingdom	2022
697	GCA_022308175.1	Unknown	Kenya: Nairobi	2019
698	GCA_022322025.1	feces	Australia: NSW	2019
699	GCA_022325305.1	feces	Australia: NSW	2020
700	GCA_022325585.1	feces	Australia: NSW	2020
701	GCA_022325625.1	feces	Australia: NSW	2020
702	GCA_022444005.2	rectal swab	USA	2021
703	GCA_022444645.2	urine	USA	2021
704	GCA_022452985.1	human	United Kingdom: United Kingdom	2022
705	GCA_022453285.1	human	United Kingdom: United Kingdom	2022
706	GCA_022453585.1	urine	China:Hangzhou	2021
707	GCA_022476595.1	human	United Kingdom: United Kingdom	2022
708	GCA_022515575.1	human	United Kingdom: United Kingdom	2022
709	GCA_022515675.1	human	United Kingdom: United Kingdom	2022
710	GCA_022515705.1	human	United Kingdom: United Kingdom	2022
711	GCA_022515915.1	human	United Kingdom: United Kingdom	2022
712	GCA_022550515.1	Rectal swab	France: Paris	2019
713	GCA_022550695.1	Rectal swab	France: Paris	2019
714	GCA_022550715.1	Rectal swab	France: Paris	2019
715	GCA_022550785.1	Rectal swab	France: Paris	2019
716	GCA_022550995.1	Rectal swab	France: Paris	2019
717	GCA_022551055.1	Rectal swab	France: Paris	2019
718	GCA_022551135.1	Rectal swab	France: Paris	2019
719	GCA_022559805.1	stool	China	2020
720	GCA_022559875.1	rectal swab	Italy	2020
721	GCA_022570655.1	human	United Kingdom: United Kingdom	2022
722	GCA_022604675.1	clinical sample	Pakistan	2020
723	GCA_022630355.1	human	United Kingdom: United Kingdom	2022
724	GCA_022688805.1	feces	China: Fuzhou	2021
725	GCA_022694035.1	rectal swab	Brazil: Sao Paulo	2019
726	GCA_022694045.1	rectal swab	Brazil: Sao Paulo	2019
727	GCA_022694095.1	rectal swab	Brazil: Sao Paulo	2019
728	GCA_022694205.1	rectal swab	Brazil: Sao Paulo	2019
729	GCA_022694325.1	rectal swab	Brazil: Sao Paulo	2019
730	GCA_022758395.1	rectal swab	Brazil: Sao Paulo	2019
731	GCA_022758585.1	rectal swab	Brazil: Sao Paulo	2019
732	GCA_022758625.1	rectal swab	Brazil: Sao Paulo	2019
733	GCA_022758665.1	rectal swab	Brazil: Sao Paulo	2019
734	GCA_022758725.1	rectal swab	Brazil: Sao Paulo	2019
735	GCA_022758765.1	rectal swab	Brazil: Sao Paulo	2020
736	GCA_022758815.1	rectal swab	Brazil: Sao Paulo	2020
737	GCA_022761245.1	stool	China: Jiangsu	2021
738	GCA_022761345.1	stool	China: Jiangsu	2021
739	GCA_022761365.1	stool	China: Jiangsu	2021
740	GCA_022761425.1	stool	China: Jiangsu	2021
741	GCA_022761445.1	stool	China: Jiangsu	2021
742	GCA_022761505.1	nasal cavity	China: Jiangsu	2021
743	GCA_022761605.1	stool	China: Jiangsu	2021
744	GCA_022761625.1	stool	China: Jiangsu	2021
745	GCA_022761645.1	stool	China: Jiangsu	2021
746	GCA_022761665.1	stool	China: Jiangsu	2021
747	GCA_022761685.1	stool	China: Jiangsu	2021
748	GCA_022761705.1	stool	China: Jiangsu	2021
749	GCA_022763025.1	stool	China: Jiangsu	2021
750	GCA_022833545.1	Unknown	Unknown	2019
751	GCA_022833585.1	Unknown	Unknown	2019
752	GCA_022846255.1	Unknown	Japan	2019
753	GCA_022871285.1	human	United Kingdom: United Kingdom	2022
754	GCA_022871305.1	human	United Kingdom: United Kingdom	2022
755	GCA_022871455.1	human	United Kingdom: United Kingdom	2022
756	GCA_022905955.1	human	United Kingdom: United Kingdom	2022
757	GCA_022911415.1	human	United Kingdom: United Kingdom	2022
758	GCA_022916575.1	human	United Kingdom: United Kingdom	2022
759	GCA_022918835.1	Vaginal secretion	China:Zhuhai	2021
760	GCA_022919035.1	Vaginal secretion	China:Zhuhai	2022
761	GCA_022919055.1	Vaginal secretion	China:Zhuhai	2021
762	GCA_022941605.1	human	United Kingdom: United Kingdom	2022
763	GCA_022942005.1	human	United Kingdom: United Kingdom	2022
764	GCA_022963515.2	blood	USA	2022
765	GCA_022964115.2	urine	USA	2022
766	GCA_022968075.1	rectal	Ghana: Kumasi	2021
767	GCA_022968495.1	rectal	Ghana: Kumasi	2021
768	GCA_022968555.1	rectal	Ghana: Kumasi	2021
769	GCA_022982975.1	Vaginal secretion	China:Zhuhai	2021
770	GCA_023019105.1	urine	Pakistan	2021
771	GCA_023019465.1	urine	Pakistan	2021
772	GCA_023054405.1	human	United Kingdom: United Kingdom	2022
773	GCA_023063655.1	human	United Kingdom: United Kingdom	2022
774	GCA_023071375.2	urine	USA	2022
775	GCA_023100765.1	urine	China	2020
776	GCA_023108425.1	Unknown	Thailand: Nakhon Pathom	2022
777	GCA_023115175.2	urine	USA	2021
778	GCA_023116715.1	human	United Kingdom: United Kingdom	2022
779	GCA_023200995.1	human	United Kingdom: United Kingdom	2022
780	GCA_023202855.1	human	United Kingdom: United Kingdom	2022
781	GCA_023238365.1	urine	China: Zhuhai	2021
782	GCA_023280665.1	human	United Kingdom: United Kingdom	2022
783	GCA_023282165.1	human	United Kingdom: United Kingdom	2022
784	GCA_023306845.1	human	United Kingdom: United Kingdom	2022
785	GCA_023338915.1	hospital	Germany	2021
786	GCA_023340345.1	hospital	Germany	2021
787	GCA_023340935.1	hospital	Germany	2021
788	GCA_023341075.1	hospital	Germany	2021
789	GCA_023342595.1	human	United Kingdom: United Kingdom	2022
790	GCA_023342795.1	hospital	Germany	2021
791	GCA_023342915.1	hospital	Germany	2021
792	GCA_023343515.1	hospital	Germany	2021
793	GCA_023343555.1	hospital	Germany	2021
794	GCA_023347375.1	human	United Kingdom: United Kingdom	2022
795	GCA_023376095.1	bladder epithelial biopsy from 30-year-old female patient with recurrent urinary tract infection	Mexico: Mexico City	2019
796	GCA_023424705.1	Unknown	USA	2022
797	GCA_023472815.1	stool	China: Ningbo	2020
798	GCA_023516055.1	Human feces	China:Shenzhen	2019
799	GCA_023516075.1	Human feces	China:Shenzhen	2019
800	GCA_023516095.1	Human feces	China:Shenzhen	2019
801	GCA_023516115.1	Human feces	China:Shenzhen	2019
802	GCA_023516135.1	Human feces	China:Shenzhen	2019
803	GCA_023517015.1	human	United Kingdom: United Kingdom	2022
804	GCA_023517075.1	human	United Kingdom: United Kingdom	2022
805	GCA_023517095.1	human	United Kingdom: United Kingdom	2022
806	GCA_023520395.1	human	United Kingdom: United Kingdom	2022
807	GCA_023520655.1	human	United Kingdom: United Kingdom	2022
808	GCA_023520955.1	human	United Kingdom: United Kingdom	2022
809	GCA_023538635.1	human	United Kingdom: United Kingdom	2022
810	GCA_023558255.1	human	United Kingdom: United Kingdom	2022
811	GCA_023565365.1	human	United Kingdom: United Kingdom	2022
812	GCA_023565425.1	human	United Kingdom: United Kingdom	2022
813	GCA_023571945.1	stool	Bangladesh	2019
814	GCA_023571995.1	stool	Bangladesh	2019
815	GCA_023572125.1	stool	Bangladesh	2020
816	GCA_023572155.1	urine	Bangladesh	2020
817	GCA_023582805.1	Rectal Swab	Australia:Queensland	2019
818	GCA_023583505.1	Rectal Swab	Australia:Queensland	2019
819	GCA_023585025.1	Rectal Swab	Australia:Queensland	2019
820	GCA_023586485.1	Rectal Swab	Australia:Queensland	2019
821	GCA_023595565.1	urine	Australia:Queensland	2019
822	GCA_023595625.1	urine	Australia:Queensland	2019
823	GCA_023596445.1	Perineum Swab	Australia:Queensland	2019
824	GCA_023596665.1	urine	Australia:Queensland	2019
825	GCA_023598245.1	urine	Australia:Queensland	2019
826	GCA_023598785.1	Unknown	China	2019
827	GCA_023598805.1	Unknown	China	2019
828	GCA_023598985.1	Unknown	China	2019
829	GCA_023599035.1	Unknown	China	2019
830	GCA_023599055.1	Unknown	China	2019
831	GCA_023599245.1	Unknown	China	2019
832	GCA_023599255.1	Unknown	China	2019
833	GCA_023599285.1	Unknown	China	2019
834	GCA_023599345.1	Unknown	China	2019
835	GCA_023599355.1	Unknown	China	2019
836	GCA_023599395.1	Unknown	China	2019
837	GCA_023599545.1	Unknown	China	2019
838	GCA_023599595.1	Unknown	China	2019
839	GCA_023599665.1	Unknown	China	2019
840	GCA_023599705.1	Unknown	China	2019
841	GCA_023599745.1	Unknown	China	2019
842	GCA_023599825.1	Unknown	China	2019
843	GCA_023599845.1	Unknown	China	2019
844	GCA_023599855.1	Unknown	China	2019
845	GCA_023599945.1	Unknown	China	2019
846	GCA_023599965.1	Unknown	China	2019
847	GCA_023599995.1	Unknown	China	2019
848	GCA_023600005.1	Unknown	China	2019
849	GCA_023600045.1	Unknown	China	2019
850	GCA_023600065.1	Unknown	China	2019
851	GCA_023600075.1	Unknown	China	2019
852	GCA_023600125.1	Unknown	China	2019
853	GCA_023600165.1	Unknown	China	2019
854	GCA_023600175.1	Unknown	China	2019
855	GCA_023600225.1	Unknown	China	2019
856	GCA_023600305.1	Unknown	China	2019
857	GCA_023600345.1	Unknown	China	2019
858	GCA_023600385.1	Unknown	China	2019
859	GCA_023600405.1	Unknown	China	2019
860	GCA_023600455.1	Unknown	China	2019
861	GCA_023600505.1	Unknown	China	2019
862	GCA_023600545.1	Unknown	China	2019
863	GCA_023600585.1	Unknown	China	2019
864	GCA_023600605.1	Unknown	China	2019
865	GCA_023600625.1	Unknown	China	2019
866	GCA_023600655.1	Unknown	China	2019
867	GCA_023600715.1	Unknown	China	2019
868	GCA_023600745.1	Unknown	China	2019
869	GCA_023600755.1	Unknown	China	2019
870	GCA_023600845.1	Unknown	China	2019
871	GCA_023602705.1	Rectal Swab	Australia:Queensland	2019
872	GCA_023612515.1	Rectal Swab	Australia:Queensland	2019
873	GCA_023613535.1	Perianal Swab	Australia:Queensland	2019
874	GCA_023675525.1	Rectal Swab	Australia:Queensland	2021
875	GCA_023684645.1	human	United Kingdom: United Kingdom	2022
876	GCA_023685785.1	Rectal Swab	Australia:Queensland	2020
877	GCA_023695245.1	human	United Kingdom: United Kingdom	2022
878	GCA_023730115.1	Rectal Swab	Australia:Queensland	2019
879	GCA_023755925.2	Rectal Swab	USA	2022
880	GCA_023760005.1	Rectal Swab	Australia:Queensland	2020
881	GCA_023768345.1	human	United Kingdom: United Kingdom	2022
882	GCA_023769025.1	human	United Kingdom: United Kingdom	2022
883	GCA_023770145.1	human	United Kingdom: United Kingdom	2022
884	GCA_023773165.1	human	United Kingdom: United Kingdom	2022
885	GCA_023775855.2	urine	USA	2022
886	GCA_023792875.1	human	United Kingdom: United Kingdom	2022
887	GCA_023814945.1	human	United Kingdom: United Kingdom	2022
888	GCA_023857045.1	urine	USA: District of Columbia	2020
889	GCA_023857145.1	urine	USA: District of Columbia	2020
890	GCA_023857345.1	urine	USA: District of Columbia	2020
891	GCA_023857605.1	wound	USA: District of Columbia	2020
892	GCA_023857785.1	urine	USA: District of Columbia	2020
893	GCA_023857885.1	urine	USA: District of Columbia	2020
894	GCA_023858225.1	urine	USA: District of Columbia	2019
895	GCA_023858325.1	urine	USA: District of Columbia	2020
896	GCA_023858485.1	urine	USA: District of Columbia	2019
897	GCA_023858725.1	urine	USA: District of Columbia	2020
898	GCA_023858905.1	urine	USA: District of Columbia	2020
899	GCA_023859085.1	urine	USA: District of Columbia	2020
900	GCA_023859365.1	urine	USA: District of Columbia	2019
901	GCA_023859905.1	urine	USA: District of Columbia	2020
902	GCA_023859945.1	urine	USA: District of Columbia	2020
903	GCA_023860145.1	urine	USA: District of Columbia	2020
904	GCA_023860285.1	urine	USA: District of Columbia	2020
905	GCA_023860645.1	urine	USA: District of Columbia	2019
906	GCA_023860805.1	urine	USA: District of Columbia	2020
907	GCA_023861685.1	urine	USA: District of Columbia	2020
908	GCA_023861905.1	urine	USA: District of Columbia	2020
909	GCA_023862205.1	urine	USA: District of Columbia	2019
910	GCA_023862245.1	urine	USA: District of Columbia	2020
911	GCA_023862385.1	urine	USA: District of Columbia	2019
912	GCA_023862725.1	urine	USA: District of Columbia	2020
913	GCA_023862945.1	urine	USA: District of Columbia	2020
914	GCA_023863425.1	urine	USA: District of Columbia	2020
915	GCA_023865395.1	urine	USA: District of Columbia	2019
916	GCA_023865735.1	urine	USA: District of Columbia	2019
917	GCA_023866075.1	urine	USA: District of Columbia	2020
918	GCA_023866215.1	urine	USA: District of Columbia	2019
919	GCA_023867155.1	urine	USA: District of Columbia	2020
920	GCA_023867315.1	other	USA: District of Columbia	2020
921	GCA_023867435.1	urine	USA: District of Columbia	2019
922	GCA_023867495.1	urine	USA: District of Columbia	2020
923	GCA_023867875.1	blood	USA: District of Columbia	2020
924	GCA_023868875.1	urine	USA: District of Columbia	2019
925	GCA_023868905.1	urine	USA: District of Columbia	2020
926	GCA_023869015.1	urine	USA: District of Columbia	2019
927	GCA_023869195.1	urine	USA: District of Columbia	2020
928	GCA_023869215.1	urine	USA: District of Columbia	2020
929	GCA_023869305.1	urine	USA: District of Columbia	2020
930	GCA_023869565.1	urine	USA: District of Columbia	2020
931	GCA_023869725.1	wound	USA: District of Columbia	2020
932	GCA_023869745.1	urine	USA: District of Columbia	2019
933	GCA_023869925.1	urine	USA: District of Columbia	2020
934	GCA_023870105.1	urine	USA: District of Columbia	2020
935	GCA_023870375.1	urine	USA: District of Columbia	2020
936	GCA_023870585.1	urine	USA: District of Columbia	2020
937	GCA_023870785.1	urine	USA: District of Columbia	2020
938	GCA_023871275.1	urine	USA: District of Columbia	2020
939	GCA_023871505.1	urine	USA: District of Columbia	2020
940	GCA_023871525.1	urine	USA: District of Columbia	2019
941	GCA_023871845.1	urine	USA: District of Columbia	2020
942	GCA_023871925.1	urine	USA: District of Columbia	2020
943	GCA_023874585.1	urine	USA: District of Columbia	2020
944	GCA_023876205.1	urine	USA: District of Columbia	2019
945	GCA_023876665.1	urine	USA: District of Columbia	2020
946	GCA_023876705.1	urine	USA: District of Columbia	2020
947	GCA_023876885.1	urine	USA: District of Columbia	2020
948	GCA_023877105.1	urine	USA: District of Columbia	2020
949	GCA_023878125.1	urine	USA: District of Columbia	2020
950	GCA_023878545.1	urine	USA: District of Columbia	2020
951	GCA_023878755.1	urine	USA: District of Columbia	2020
952	GCA_023879565.1	urine	USA: District of Columbia	2020
953	GCA_023879725.1	urine	USA: District of Columbia	2020
954	GCA_023880045.1	urine	USA: District of Columbia	2019
955	GCA_023880705.1	urine	USA: District of Columbia	2020
956	GCA_023880885.1	urine	USA: District of Columbia	2019
957	GCA_023880985.1	urine	USA: District of Columbia	2020
958	GCA_023881025.1	urine	USA: District of Columbia	2019
959	GCA_023881785.1	urine	USA: District of Columbia	2019
960	GCA_023882165.1	urine	USA: District of Columbia	2019
961	GCA_023883185.1	urine	USA: District of Columbia	2020
962	GCA_023883255.1	urine	USA: District of Columbia	2020
963	GCA_023883645.1	urine	USA: District of Columbia	2019
964	GCA_023883825.1	urine	USA: District of Columbia	2020
965	GCA_023884065.1	urine	USA: District of Columbia	2020
966	GCA_023884765.1	urine	USA: District of Columbia	2019
967	GCA_023885335.1	Perirectal	USA: District of Columbia	2020
968	GCA_023885385.1	urine	USA: District of Columbia	2019
969	GCA_023886345.1	urine	USA: District of Columbia	2020
970	GCA_023886445.1	urine	USA: District of Columbia	2020
971	GCA_023886665.1	urine	USA: District of Columbia	2020
972	GCA_023886945.1	urine	USA: District of Columbia	2020
973	GCA_023887085.1	urine	USA: District of Columbia	2020
974	GCA_023890325.1	urine	USA: District of Columbia	2020
975	GCA_023890345.1	urine	USA: District of Columbia	2020
976	GCA_023890495.1	urine	USA: District of Columbia	2020
977	GCA_023891845.1	urine	USA: District of Columbia	2020
978	GCA_023892025.1	urine	USA: District of Columbia	2020
979	GCA_023894765.1	urine	USA: District of Columbia	2020
980	GCA_023894885.1	urine	USA: District of Columbia	2020
981	GCA_023925695.1	clinical material	Israel	2019
982	GCA_023930455.1	clinical material	Israel	2019
983	GCA_023999315.1	human	United Kingdom: United Kingdom	2022
984	GCA_023999515.1	human	United Kingdom: United Kingdom	2022
985	GCA_024024355.1	clinical material	Israel	2019
986	GCA_024073025.1	blood	Israel: Chaim Sheba Medical Center, Tal Hashomer, Ramat Gan	2019
987	GCA_024099815.2	urine	USA	2022
988	GCA_024108255.2	urine	USA	2022
989	GCA_024110895.1	Perianal Swab	Australia:Queensland	2020
990	GCA_024132105.1	human	United Kingdom: United Kingdom	2022
991	GCA_024132905.1	human	United Kingdom: United Kingdom	2022
992	GCA_024137505.1	human	United Kingdom: United Kingdom	2022
993	GCA_024164545.1	urine	USA: District of Columbia	2020
994	GCA_024165765.1	urine	USA: District of Columbia	2020
995	GCA_024168085.2	rectal swab	USA	2022
996	GCA_024168745.1	rectal swab	USA	2022
997	GCA_024179825.1	human	United Kingdom: United Kingdom	2022
998	GCA_024180965.1	human	United Kingdom: United Kingdom	2022
999	GCA_024187775.2	rectal swab	USA	2022
1000	GCA_024198585.1	urine	Denmark:Copenhagen	2019
1001	GCA_024198665.1	urine	Denmark:Copenhagen	2020
1002	GCA_024198925.1	urine	Denmark:Copenhagen	2019
1003	GCA_024230575.1	human	United Kingdom: United Kingdom	2022
1004	GCA_024231635.1	human	United Kingdom: United Kingdom	2022
1005	GCA_024264945.1	blood	Viet Nam	2020
1006	GCA_024271485.1	urine	Denmark:Copenhagen	2019
1007	GCA_024287635.2	urine	USA	2022
1008	GCA_024290315.2	urine	USA	2022
1009	GCA_024298465.1	Unknown	China:Zhejiang	2021
1010	GCA_024298565.1	Unknown	China:Zhejiang	2021
1011	GCA_024298725.1	Unknown	China:Zhejiang	2021
1012	GCA_024298765.1	Unknown	China:Zhejiang	2021
1013	GCA_024298785.1	Unknown	China:Zhejiang	2021
1014	GCA_024300685.1	Unknown	Unknown	2021
1015	GCA_024300705.1	Unknown	Unknown	2021
1016	GCA_024300765.1	Unknown	Unknown	2021
1017	GCA_024300785.1	Unknown	Unknown	2021
1018	GCA_024301965.1	human	United Kingdom: United Kingdom	2022
1019	GCA_024303925.1	human	United Kingdom: United Kingdom	2022
1020	GCA_024304245.1	human	United Kingdom: United Kingdom	2022
1021	GCA_024372195.1	blood	Viet Nam	2020
1022	GCA_024394695.1	human	United Kingdom: United Kingdom	2022
1023	GCA_024394795.1	human	United Kingdom: United Kingdom	2022
1024	GCA_024394835.1	human	United Kingdom: United Kingdom	2022
1025	GCA_024395055.1	human	United Kingdom: United Kingdom	2022
1026	GCA_024395095.1	human	United Kingdom: United Kingdom	2022
1027	GCA_024395335.1	urine	Pakistan	2021
1028	GCA_024395615.1	urine	Pakistan	2021
1029	GCA_024427665.1	human	United Kingdom: United Kingdom	2022
1030	GCA_024435435.1	Unknown	China:Beijing	2019
1031	GCA_024445715.1	JSE19:midstream urine	China:Ruijin Hospital, Shanghai Jiao Tong University School of Medicine	2021
1032	GCA_024445775.1	midstream urine	China:Ruijin Hospital, Shanghai Jiao Tong University School of Medicine	2021
1033	GCA_024457035.1	Human blood sample	Ethiopia: Dessie	2019
1034	GCA_024471435.1	Human blood sample	Ethiopia: Addis Ababa	2019
1035	GCA_024471795.1	Human blood sample	Ethiopia: Addis Ababa	2019
1036	GCA_024472625.1	Human blood sample	Ethiopia: Dessie	2019
1037	GCA_024473605.1	Human blood sample	Ethiopia: Dessie	2019
1038	GCA_024479145.1	Human blood sample	Ethiopia: Addis Ababa	2019
1039	GCA_024483925.2	Not Collected	USA	2022
1040	GCA_024485745.1	human	United Kingdom: United Kingdom	2022
1041	GCA_024490455.1	human	Spain	2019
1042	GCA_024493375.1	human	Spain	2019
1043	GCA_024493715.1	human	Spain	2019
1044	GCA_024514115.1	human	Spain	2019
1045	GCA_024527035.1	human	United Kingdom: United Kingdom	2022
1046	GCA_024539555.1	stool	Greece:Thessaloniki	2021
1047	GCA_024560785.2	blood	USA	2021
1048	GCA_024565965.1	human	United Kingdom: United Kingdom	2022
1049	GCA_024567125.1	human	United Kingdom: United Kingdom	2022
1050	GCA_024583905.1	Rectal swab	South Africa:Pretoria	2020
1051	GCA_024599975.1	blood	Italy: Bologna	2020
1052	GCA_024601315.1	human	United Kingdom: United Kingdom	2022
1053	GCA_024601555.1	human	United Kingdom: United Kingdom	2022
1054	GCA_024609965.1	stool	Thailand	2019
1055	GCA_024610435.1	stool	Thailand	2019
1056	GCA_024611455.1	stool	Thailand	2019
1057	GCA_024611585.1	stool	Thailand	2019
1058	GCA_024612155.1	stool	Thailand	2019
1059	GCA_024612195.1	stool	Thailand	2019
1060	GCA_024612445.1	human	United Kingdom: United Kingdom	2022
1061	GCA_024612825.1	stool	Thailand	2019
1062	GCA_024612865.1	stool	Thailand	2019
1063	GCA_024612905.1	stool	Thailand	2019
1064	GCA_024612985.1	stool	Thailand	2019
1065	GCA_024613265.1	stool	Thailand	2019
1066	GCA_024613325.1	stool	Thailand	2019
1067	GCA_024613425.1	stool	Thailand	2019
1068	GCA_024613485.1	stool	Thailand	2019
1069	GCA_024613565.1	stool	Thailand	2019
1070	GCA_024613685.1	stool	Thailand	2019
1071	GCA_024614405.1	stool	Thailand	2019
1072	GCA_024614525.1	stool	Thailand	2019
1073	GCA_024614565.1	stool	Thailand	2019
1074	GCA_024614585.1	stool	Thailand	2019
1075	GCA_024614605.1	stool	Thailand	2019
1076	GCA_024614625.1	stool	Thailand	2019
1077	GCA_024614705.1	stool	Thailand	2019
1078	GCA_024614765.1	stool	Thailand	2019
1079	GCA_024614925.1	feces	USA: Utah	2019
1080	GCA_024620165.1	feces	USA: Utah	2019
1081	GCA_024634765.1	feces	USA: Utah	2020
1082	GCA_024656975.1	feces	USA: Utah	2020
1083	GCA_024662075.1	cerebrospinal fluid	Italy: Bologna	2020
1084	GCA_024672215.1	stool	Thailand	2019
1085	GCA_024672445.1	stool	Thailand	2019
1086	GCA_024672815.1	stool	Thailand	2019
1087	GCA_024672915.1	stool	Thailand	2019
1088	GCA_024672935.1	stool	Thailand	2019
1089	GCA_024674215.1	stool	Thailand	2019
1090	GCA_024674345.1	stool	Thailand	2019
1091	GCA_024674365.1	stool	Thailand	2019
1092	GCA_024674425.1	stool	Thailand	2019
1093	GCA_024674465.1	stool	Thailand	2019
1094	GCA_024674485.1	stool	Thailand	2019
1095	GCA_024674955.1	stool	Thailand	2019
1096	GCA_024675005.1	stool	Thailand	2019
1097	GCA_024675025.1	stool	Thailand	2019
1098	GCA_024675065.1	stool	Thailand	2019
1099	GCA_024675095.1	stool	Thailand	2019
1100	GCA_024675135.1	stool	Thailand	2019
1101	GCA_024675215.1	stool	Thailand	2019
1102	GCA_024675515.1	stool	Thailand	2019
1103	GCA_024675535.1	stool	Thailand	2019
1104	GCA_024675555.1	stool	Thailand	2019
1105	GCA_024675575.1	stool	Thailand	2019
1106	GCA_024675655.1	stool	Thailand	2019
1107	GCA_024675695.1	stool	Thailand	2019
1108	GCA_024675875.1	stool	Thailand	2019
1109	GCA_024675935.1	stool	Thailand	2019
1110	GCA_024675955.1	stool	Thailand	2019
1111	GCA_024676055.1	stool	Thailand	2019
1112	GCA_024676095.1	stool	Thailand	2019
1113	GCA_024676775.1	stool	Thailand	2019
1114	GCA_024680075.1	stool	Thailand	2019
1115	GCA_024680135.1	stool	Thailand	2019
1116	GCA_024680195.1	stool	Thailand	2019
1117	GCA_024680415.1	stool	Thailand	2019
1118	GCA_024680875.1	stool	Thailand	2019
1119	GCA_024680995.1	stool	Thailand	2019
1120	GCA_024683755.1	stool	Thailand	2019
1121	GCA_024683915.1	stool	Thailand	2019
1122	GCA_024684555.1	stool	Thailand	2019
1123	GCA_024684635.1	stool	Thailand	2019
1124	GCA_024686875.1	stool	Thailand	2019
1125	GCA_024686965.1	stool	Thailand	2019
1126	GCA_024687245.1	stool	Thailand	2019
1127	GCA_024700565.1	feces	India: Dyapalapura, Hassan district, Karnataka	2021
1128	GCA_024729625.1	human	United Kingdom: United Kingdom	2022
1129	GCA_024752035.1	blood	USA: Houston	2019
1130	GCA_024765655.1	urine	USA: St. Louis	2019
1131	GCA_024766035.1	urine	USA: St. Louis	2019
1132	GCA_024766655.1	urine	USA: St. Louis	2019
1133	GCA_024768015.1	urine	USA: St. Louis	2019
1134	GCA_024800185.1	human	United Kingdom: United Kingdom	2022
1135	GCA_024800905.1	human	United Kingdom: United Kingdom	2022
1136	GCA_024801005.1	human	United Kingdom: United Kingdom	2022
1137	GCA_024846885.1	human	United Kingdom: United Kingdom	2022
1138	GCA_024847025.1	human	United Kingdom: United Kingdom	2022
1139	GCA_024849065.1	human	United Kingdom: United Kingdom	2022
1140	GCA_024866705.1	rectal swab isolate	USA	2022
1141	GCA_024867795.2	rectal swab	USA	2022
1142	GCA_024886875.1	Pus	Unknown	2019
1143	GCA_024917535.1	blood	USA: Houston	2019
1144	GCA_024917715.1	blood	USA: Houston	2019
1145	GCA_024917735.1	blood	USA: Houston	2019
1146	GCA_024917795.1	blood	USA: Houston	2019
1147	GCA_024918035.1	blood	USA: Houston	2019
1148	GCA_024918135.1	blood	USA: Houston	2020
1149	GCA_024925925.1	human	United Kingdom: United Kingdom	2022
1150	GCA_024926225.1	human	United Kingdom: United Kingdom	2022
1151	GCA_024926405.1	human	United Kingdom: United Kingdom	2022
1152	GCA_024926925.1	human	United Kingdom: United Kingdom	2022
1153	GCA_024934585.1	human	United Kingdom: United Kingdom	2022
1154	GCA_024936865.1	human	United Kingdom: United Kingdom	2022
1155	GCA_024936905.1	human	United Kingdom: United Kingdom	2022
1156	GCA_024937905.1	human	United Kingdom: United Kingdom	2022
1157	GCA_024950645.1	human	United Kingdom: United Kingdom	2022
1158	GCA_024980175.1	Unknown	Canada	2019
1159	GCA_025006125.1	human	United Kingdom: United Kingdom	2022
1160	GCA_025026535.1	human	United Kingdom: United Kingdom	2022
1161	GCA_025027415.1	human	United Kingdom: United Kingdom	2022
1162	GCA_025030795.1	Unknown	Canada	2019
1163	GCA_025033595.1	Unknown	Canada	2019
1164	GCA_025033735.1	Unknown	Canada	2020
1165	GCA_025034035.1	Unknown	Canada	2019
1166	GCA_025034195.1	Unknown	Canada	2020
1167	GCA_025034235.1	Unknown	Canada	2019
1168	GCA_025034315.1	Unknown	Canada	2019
1169	GCA_025035285.1	Unknown	Canada	2019
1170	GCA_025035705.1	Unknown	Canada	2019
1171	GCA_025037445.1	Unknown	Canada	2019
1172	GCA_025037825.1	Unknown	Canada	2020
1173	GCA_025037885.1	Unknown	Canada	2020
1174	GCA_025038255.1	Unknown	Canada	2020
1175	GCA_025038575.1	Unknown	Canada	2020
1176	GCA_025038735.1	Unknown	Canada	2019
1177	GCA_025038875.1	Unknown	Canada	2019
1178	GCA_025064815.2	urine	USA	2022
1179	GCA_025096785.1	human	United Kingdom: United Kingdom	2022
1180	GCA_025136535.1	human	United Kingdom: United Kingdom	2022
1181	GCA_025136615.1	human	United Kingdom: United Kingdom	2022
1182	GCA_025140075.1	human	United Kingdom: United Kingdom	2022
1183	GCA_025140255.1	human	United Kingdom: United Kingdom	2022
1184	GCA_025142175.1	human	United Kingdom: United Kingdom	2022
1185	GCA_025153815.1	human	United Kingdom: United Kingdom	2022
1186	GCA_025156795.1	Unknown	China: Beijing	2019
1187	GCA_025156885.1	Unknown	China: Beijing	2019
1188	GCA_025156915.1	Unknown	China: Beijing	2019
1189	GCA_025157105.1	Unknown	China: Beijing	2019
1190	GCA_025157255.1	Unknown	China: Beijing	2019
1191	GCA_025157275.1	Unknown	China: Beijing	2019
1192	GCA_025163295.1	human	United Kingdom: United Kingdom	2022
1193	GCA_025218285.1	abdomen	Germany: Cologne	2019
1194	GCA_025232455.1	Rectal swab	Switzerland: Basel	2019
1195	GCA_025232475.1	Rectal swab	Switzerland: Basel	2019
1196	GCA_025251565.1	human	United Kingdom: United Kingdom	2022
1197	GCA_025251925.1	human	United Kingdom: United Kingdom	2022
1198	GCA_025259645.1	Rectal Swab	USA	2021
1199	GCA_025275715.1	human	Ecuador: Quito	2021
1200	GCA_025276215.1	human	Ecuador: Quito	2021
1201	GCA_025276275.1	human	Ecuador: Quito	2021
1202	GCA_025277695.1	human	Ecuador: Quito	2021
1203	GCA_025277995.1	human	Ecuador: Quito	2021
1204	GCA_025278295.1	human	Ecuador: Quito	2021
1205	GCA_025279035.1	human	Ecuador: Quito	2021
1206	GCA_025279095.1	human	Ecuador: Quito	2021
1207	GCA_025279215.1	human	Ecuador: Quito	2021
1208	GCA_025279275.1	human	Ecuador: Quito	2021
1209	GCA_025279315.1	human	Ecuador: Quito	2021
1210	GCA_025279395.1	human	Ecuador: Quito	2021
1211	GCA_025280335.1	human	Ecuador: Quito	2021
1212	GCA_025280395.1	human	Ecuador: Quito	2021
1213	GCA_025280495.1	human	Ecuador: Quito	2021
1214	GCA_025281915.1	human	Ecuador: Quito	2021
1215	GCA_025283155.1	human	Ecuador: Quito	2021
1216	GCA_025283395.1	human	Ecuador: Quito	2021
1217	GCA_025283415.1	human	Ecuador: Quito	2021
1218	GCA_025283475.1	human	Ecuador: Quito	2021
1219	GCA_025283675.1	human	Ecuador: Quito	2021
1220	GCA_025283795.1	human	Ecuador: Quito	2021
1221	GCA_025283815.1	human	Ecuador: Quito	2021
1222	GCA_025283875.1	human	Ecuador: Quito	2021
1223	GCA_025283975.1	human	Ecuador: Quito	2021
1224	GCA_025283985.1	human	Ecuador: Quito	2021
1225	GCA_025284335.1	human	Ecuador: Quito	2021
1226	GCA_025284875.1	human	Ecuador: Quito	2021
1227	GCA_025284915.1	human	Ecuador: Quito	2021
1228	GCA_025285135.1	human	Ecuador: Quito	2021
1229	GCA_025286935.1	human	Ecuador: Quito	2021
1230	GCA_025287335.1	human	Ecuador: Quito	2021
1231	GCA_025287395.1	human	Ecuador: Quito	2021
1232	GCA_025287775.1	human	Ecuador: Quito	2021
1233	GCA_025287815.1	human	Ecuador: Quito	2021
1234	GCA_025287875.1	human	Ecuador: Quito	2021
1235	GCA_025288895.1	human	Ecuador: Quito	2021
1236	GCA_025288995.1	human	Ecuador: Quito	2021
1237	GCA_025289215.1	human	Ecuador: Quito	2021
1238	GCA_025290415.1	human	Ecuador: Quito	2021
1239	GCA_025290455.1	human	Ecuador: Quito	2021
1240	GCA_025290495.1	human	Ecuador: Quito	2021
1241	GCA_025290535.1	human	Ecuador: Quito	2021
1242	GCA_025290635.1	human	Ecuador: Quito	2021
1243	GCA_025292055.1	human	Ecuador: Quito	2021
1244	GCA_025292165.1	human	Ecuador: Quito	2021
1245	GCA_025292635.1	human	Ecuador: Quito	2021
1246	GCA_025292795.1	human	Ecuador: Quito	2021
1247	GCA_025293045.1	human	Ecuador: Quito	2021
1248	GCA_025294035.1	human	Ecuador: Quito	2021
1249	GCA_025294175.1	human	Ecuador: Quito	2021
1250	GCA_025294435.1	human	Ecuador: Quito	2021
1251	GCA_025294675.1	human	Ecuador: Quito	2021
1252	GCA_025294695.1	human	Ecuador: Quito	2021
1253	GCA_025294715.1	human	Ecuador: Quito	2021
1254	GCA_025294795.1	human	Ecuador: Quito	2021
1255	GCA_025296335.1	human	Ecuador: Quito	2021
1256	GCA_025296375.1	human	Ecuador: Quito	2021
1257	GCA_025296555.1	human	Ecuador: Quito	2021
1258	GCA_025297035.1	human	Ecuador: Quito	2021
1259	GCA_025297075.1	human	Ecuador: Quito	2021
1260	GCA_025297135.1	human	Ecuador: Quito	2021
1261	GCA_025297215.1	human	Ecuador: Quito	2021
1262	GCA_025297475.1	human	Ecuador: Quito	2021
1263	GCA_025297495.1	human	Ecuador: Quito	2021
1264	GCA_025297515.1	human	Ecuador: Quito	2021
1265	GCA_025297535.1	human	Ecuador: Quito	2021
1266	GCA_025297655.1	human	Ecuador: Quito	2021
1267	GCA_025297935.1	human	Ecuador: Quito	2021
1268	GCA_025297955.1	human	Ecuador: Quito	2021
1269	GCA_025298015.1	human	Ecuador: Quito	2021
1270	GCA_025298055.1	human	Ecuador: Quito	2021
1271	GCA_025298175.1	human	Ecuador: Quito	2021
1272	GCA_025298195.1	human	Ecuador: Quito	2021
1273	GCA_025298215.1	human	Ecuador: Quito	2021
1274	GCA_025298275.1	human	Ecuador: Quito	2021
1275	GCA_025298335.1	human	Ecuador: Quito	2021
1276	GCA_025298675.1	human	Ecuador: Quito	2021
1277	GCA_025298775.1	human	Ecuador: Quito	2021
1278	GCA_025298795.1	human	Ecuador: Quito	2021
1279	GCA_025298835.1	human	Ecuador: Quito	2021
1280	GCA_025298935.1	human	Ecuador: Quito	2021
1281	GCA_025298995.1	human	Ecuador: Quito	2021
1282	GCA_025299215.1	human	Ecuador: Quito	2021
1283	GCA_025299255.1	human	Ecuador: Quito	2021
1284	GCA_025299265.1	human	Ecuador: Quito	2021
1285	GCA_025299295.1	human	Ecuador: Quito	2021
1286	GCA_025299315.1	human	Ecuador: Quito	2021
1287	GCA_025299555.1	human	Ecuador: Quito	2021
1288	GCA_025299595.1	human	Ecuador: Quito	2021
1289	GCA_025299655.1	human	Ecuador: Quito	2021
1290	GCA_025299815.1	human	Ecuador: Quito	2021
1291	GCA_025300055.1	human	Ecuador: Quito	2021
1292	GCA_025300115.1	human	Ecuador: Quito	2021
1293	GCA_025300135.1	human	Ecuador: Quito	2021
1294	GCA_025300235.1	human	Ecuador: Quito	2021
1295	GCA_025300295.1	human	Ecuador: Quito	2021
1296	GCA_025300955.1	human	Ecuador: Quito	2021
1297	GCA_025302075.1	human	Ecuador: Quito	2021
1298	GCA_025302275.1	human	Ecuador: Quito	2021
1299	GCA_025302575.1	human	Ecuador: Quito	2021
1300	GCA_025302615.1	human	Ecuador: Quito	2021
1301	GCA_025303735.1	human	Ecuador: Quito	2021
1302	GCA_025304315.1	human	Ecuador: Quito	2021
1303	GCA_025304415.1	human	Ecuador: Quito	2021
1304	GCA_025304655.1	human	Ecuador: Quito	2021
1305	GCA_025304675.1	human	Ecuador: Quito	2021
1306	GCA_025305555.1	human	Ecuador: Quito	2021
1307	GCA_025305715.1	human	Ecuador: Quito	2021
1308	GCA_025306155.1	human	Ecuador: Quito	2021
1309	GCA_025306935.1	human	United Kingdom: United Kingdom	2022
1310	GCA_025307215.1	human	United Kingdom: United Kingdom	2022
1311	GCA_025307275.1	human	United Kingdom: United Kingdom	2022
1312	GCA_025312035.1	human	Ecuador: Quito	2021
1313	GCA_025312335.1	human	Ecuador: Quito	2021
1314	GCA_025312395.1	human	Ecuador: Quito	2021
1315	GCA_025312635.1	human	Ecuador: Quito	2021
1316	GCA_025312675.1	human	Ecuador: Quito	2021
1317	GCA_025312735.1	human	Ecuador: Quito	2021
1318	GCA_025313195.1	human	Ecuador: Quito	2021
1319	GCA_025313275.1	human	Ecuador: Quito	2021
1320	GCA_025314955.1	human	Ecuador: Quito	2021
1321	GCA_025315555.1	human	United Kingdom: United Kingdom	2022
1322	GCA_025315835.1	human	United Kingdom: United Kingdom	2022
1323	GCA_025378245.1	human	United Kingdom: United Kingdom	2022
1324	GCA_025378285.1	human	United Kingdom: United Kingdom	2022
1325	GCA_025378565.1	human	United Kingdom: United Kingdom	2022
1326	GCA_025385545.1	stool	China: Shenzhen	2019
1327	GCA_025385565.1	stool	China: Shenzhen	2019
1328	GCA_025385645.1	stool	China: Shenzhen	2019
1329	GCA_025386585.1	stool	China: Shenzhen	2019
1330	GCA_025386605.1	stool	China: Shenzhen	2019
1331	GCA_025387205.1	stool	China: Shenzhen	2019
1332	GCA_025388305.1	stool	China: Shenzhen	2019
1333	GCA_025388325.1	stool	China: Shenzhen	2019
1334	GCA_025390095.1	stool	China: Shenzhen	2019
1335	GCA_025398755.1	urine	USA	2022
1336	GCA_025420695.1	blood	China: Zhejiang	2021
1337	GCA_025420835.1	urine	China: Zhejiang	2021
1338	GCA_025420875.1	blood	China: Zhejiang	2021
1339	GCA_025421095.1	blood	China: Zhejiang	2021
1340	GCA_025421435.1	urine	China: Zhejiang	2021
1341	GCA_025421625.1	urine	China: Zhejiang	2021
1342	GCA_025421895.1	fecal samples	China:Shandong	2021
1343	GCA_025421915.1	fecal samples	China:Shandong	2021
1344	GCA_025421955.1	fecal samples	China:Shandong	2021
1345	GCA_025421975.1	fecal samples	China:Shandong	2021
1346	GCA_025422015.1	fecal samples	China:Shandong	2021
1347	GCA_025580485.2	urine	USA: District of Columbia	2020
1348	GCA_025608335.1	human	Madagascar	2019
1349	GCA_025608935.1	human	Madagascar	2019
1350	GCA_025609355.1	human	Madagascar	2019
1351	GCA_025609375.1	human	Madagascar	2019
1352	GCA_025609395.1	human	Madagascar	2019
1353	GCA_025609415.1	human	Madagascar	2019
1354	GCA_025609475.1	human	Madagascar	2019
1355	GCA_025609515.1	human	Madagascar	2019
1356	GCA_025609895.1	human	Madagascar	2019
1357	GCA_025610015.1	human	Madagascar	2019
1358	GCA_025610155.1	human	Madagascar	2019
1359	GCA_025610175.1	human	Madagascar	2019
1360	GCA_025610895.1	human	Madagascar	2019
1361	GCA_025610955.1	human	Madagascar	2019
1362	GCA_025611055.1	human	Madagascar	2019
1363	GCA_025611115.1	human	Madagascar	2019
1364	GCA_025611195.1	human	Madagascar	2019
1365	GCA_025611515.1	human	Madagascar	2019
1366	GCA_025611615.1	human	Madagascar	2019
1367	GCA_025642235.1	Unknown	Sweden	2021
1368	GCA_025668565.2	urine	USA	2022
1369	GCA_025675125.1	urine	Malaysia: Segamat	2020
1370	GCA_025684095.1	Unknown	Unknown	2019
1371	GCA_025705065.1	human	United Kingdom: United Kingdom	2022
1372	GCA_025706025.1	human	United Kingdom: United Kingdom	2022
1373	GCA_025706045.1	human	United Kingdom: United Kingdom	2022
1374	GCA_025708065.1	human	United Kingdom: United Kingdom	2022
1375	GCA_025708305.1	human	United Kingdom: United Kingdom	2022
1376	GCA_025708425.1	human	United Kingdom: United Kingdom	2022
1377	GCA_025708965.1	human	United Kingdom: United Kingdom	2022
1378	GCA_025710205.1	human	United Kingdom: United Kingdom	2022
1379	GCA_025711285.1	human	United Kingdom: United Kingdom	2022
1380	GCA_025713265.1	human	United Kingdom: United Kingdom	2022
1381	GCA_025713905.1	human	United Kingdom: United Kingdom	2022
1382	GCA_025714345.1	human	United Kingdom: United Kingdom	2022
1383	GCA_025714525.1	human	United Kingdom: United Kingdom	2022
1384	GCA_025714925.1	human	United Kingdom: United Kingdom	2022
1385	GCA_025715385.1	human	United Kingdom: United Kingdom	2022
1386	GCA_025719535.1	human	United Kingdom: United Kingdom	2022
1387	GCA_025719815.1	human	United Kingdom: United Kingdom	2022
1388	GCA_025720295.1	human	United Kingdom: United Kingdom	2022
1389	GCA_025721055.1	human	United Kingdom: United Kingdom	2022
1390	GCA_025721455.1	human	United Kingdom: United Kingdom	2022
1391	GCA_025722135.1	human	United Kingdom: United Kingdom	2022
1392	GCA_025723905.1	human	United Kingdom: United Kingdom	2022
1393	GCA_025725485.1	human	United Kingdom: United Kingdom	2022
1394	GCA_025725565.1	human	United Kingdom: United Kingdom	2022
1395	GCA_025779775.2	blood	USA	2022
1396	GCA_025783135.2	urine	USA: District of Columbia	2020
1397	GCA_025783675.2	urine	USA: District of Columbia	2020
1398	GCA_025783935.2	urine	USA: District of Columbia	2020
1399	GCA_025784255.2	urine	USA: District of Columbia	2020
1400	GCA_025784455.2	urine	USA: District of Columbia	2019
1401	GCA_025784735.2	urine	USA: District of Columbia	2020
1402	GCA_025785665.2	urine	USA: District of Columbia	2019
1403	GCA_025785985.2	urine	USA: District of Columbia	2020
1404	GCA_025786465.2	urine	USA: District of Columbia	2020
1405	GCA_025787125.2	urine	USA: District of Columbia	2020
1406	GCA_025788275.2	urine	USA: District of Columbia	2019
1407	GCA_025788415.2	urine	USA: District of Columbia	2020
1408	GCA_025788455.2	urine	USA: District of Columbia	2020
1409	GCA_025788575.2	urine	USA: District of Columbia	2020
1410	GCA_025788615.2	urine	USA: District of Columbia	2020
1411	GCA_025788695.2	wound	USA: District of Columbia	2020
1412	GCA_025788795.2	urine	USA: District of Columbia	2020
1413	GCA_025789455.2	urine	USA: District of Columbia	2019
1414	GCA_025789475.2	urine	USA: District of Columbia	2019
1415	GCA_025803625.1	human	United Kingdom: United Kingdom	2022
1416	GCA_025806115.1	human	United Kingdom: United Kingdom	2022
1417	GCA_025812035.1	human	United Kingdom: United Kingdom	2022
1418	GCA_025853875.1	Rectal Swab	USA	2021
1419	GCA_025874605.1	other	Norway	2021
1420	GCA_025875065.1	Rectal sample	Norway	2021
1421	GCA_025875965.1	blood	Norway	2020
1422	GCA_025876945.1	Rectal sample	Norway	2019
1423	GCA_025877505.1	not provided	Norway	2019
1424	GCA_025877765.1	Rectal sample	Norway	2019
1425	GCA_025878225.1	Rectal sample	Norway	2019
1426	GCA_025890495.1	Unknown	Germany: Frankfurt am Main	2022
1427	GCA_025910345.1	human	United Kingdom: United Kingdom	2022
1428	GCA_025913775.1	human	United Kingdom: United Kingdom	2022
1429	GCA_025913995.1	human	United Kingdom: United Kingdom	2022
1430	GCA_025914315.1	human	United Kingdom: United Kingdom	2022
1431	GCA_025914715.1	human	United Kingdom: United Kingdom	2022
1432	GCA_025914815.1	human	United Kingdom: United Kingdom	2022
1433	GCA_025946585.1	urine	China	2021
1434	GCA_025956285.1	human	United Kingdom: United Kingdom	2022
1435	GCA_025956365.1	human	United Kingdom: United Kingdom	2022
1436	GCA_025957365.1	human	United Kingdom: United Kingdom	2022
1437	GCA_026013445.1	Unknown	Unknown	2020
1438	GCA_026040155.1	human	United Kingdom: United Kingdom	2022
1439	GCA_026047575.1	Unknown	Australia: Victoria	2019
1440	GCA_026065355.1	human	United Kingdom: United Kingdom	2022
1441	GCA_026068895.2	other	USA	2022
1442	GCA_026068995.2	Wound/Abscess	USA	2022
1443	GCA_026141645.1	human	United Kingdom: United Kingdom	2022
1444	GCA_026164425.1	human	United Kingdom: United Kingdom	2022
1445	GCA_026166065.1	human	United Kingdom: United Kingdom	2022
1446	GCA_026218195.2	urine	USA	2022
1447	GCA_026236215.1	clinical	Australia: Melbourne	2020
1448	GCA_026236375.1	clinical	Australia: Melbourne	2019
1449	GCA_026236435.1	clinical	Australia: Melbourne	2019
1450	GCA_026236775.1	rectal swab	Italy	2019
1451	GCA_026244105.1	human	United Kingdom: United Kingdom	2022
1452	GCA_026244965.1	human	United Kingdom: United Kingdom	2022
1453	GCA_026245505.1	human	United Kingdom: United Kingdom	2022
1454	GCA_026245745.1	human	United Kingdom: United Kingdom	2022
1455	GCA_026247825.1	hospital	China: Shandong	2022
1456	GCA_026248885.1	secretion	China: Xuyi	2021
1457	GCA_026255465.1	human	United Kingdom: United Kingdom	2022
1458	GCA_026255925.1	human	United Kingdom: United Kingdom	2022
1459	GCA_026278145.1	human	United Kingdom: United Kingdom	2022
1460	GCA_026278745.1	urine	Thailand	2020
1461	GCA_026300155.1	swab (superficial and non-surgical)	West Bank	2020
1462	GCA_026300695.1	urine	Zambia	2020
1463	GCA_026300975.1	aspirate	Saudi Arabia	2020
1464	GCA_026301255.1	urine	Paraguay	2020
1465	GCA_026301855.1	urine	Spain	2020
1466	GCA_026301955.1	urine	Saudi Arabia	2020
1467	GCA_026302915.1	blood	Spain	2020
1468	GCA_026303855.1	urine	Paraguay	2020
1469	GCA_026310575.1	blood	Hong Kong	2020
1470	GCA_026311415.1	blood	Hong Kong	2020
1471	GCA_026311955.1	urine	Denmark	2020
1472	GCA_026311995.1	urine	Denmark	2020
1473	GCA_026312495.1	blood	Hong Kong	2020
1474	GCA_026315265.1	urine	Pakistan	2020
1475	GCA_026317505.1	urine	Nigeria	2020
1476	GCA_026317645.1	urine	Czech Republic	2020
1477	GCA_026318225.1	urine	Zambia	2020
1478	GCA_026321095.1	aspirate	Croatia	2020
1479	GCA_026321175.1	swab (wound)	Croatia	2020
1480	GCA_026322455.1	feces	Colombia	2020
1481	GCA_026323875.1	unspecified diagnostic sample	Burkina Faso	2020
1482	GCA_026324055.1	urine	Burkina Faso	2020
1483	GCA_026324115.1	urine	Burkina Faso	2020
1484	GCA_026324135.1	urine	Burkina Faso	2020
1485	GCA_026324155.1	urine	Burkina Faso	2020
1486	GCA_026324195.1	urine	Burkina Faso	2020
1487	GCA_026326595.1	urine	Nigeria	2021
1488	GCA_026327155.1	urine	Nigeria	2020
1489	GCA_026328135.1	urine	New Zealand	2020
1490	GCA_026328235.1	urine	New Zealand	2020
1491	GCA_026328695.1	urine	Mozambique	2020
1492	GCA_026328775.1	feces	Mozambique	2020
1493	GCA_026328795.1	feces	Mozambique	2020
1494	GCA_026329335.1	aspirate	Lithuania	2020
1495	GCA_026330635.1	urine	Italy	2020
1496	GCA_026330715.1	urine	Italy	2020
1497	GCA_026331175.1	urine	Pakistan	2020
1498	GCA_026331295.1	urine	Pakistan	2020
1499	GCA_026331515.1	unspecified diagnostic sample	Hungary	2020
1500	GCA_026332395.1	blood	Hong Kong	2020
1501	GCA_026332415.1	blood	Hong Kong	2020
1502	GCA_026332475.1	urine	Pakistan	2020
1503	GCA_026332515.1	blood	Hong Kong	2020
1504	GCA_026332535.1	urine	Pakistan	2020
1505	GCA_026332975.1	blood	Hong Kong	2020
1506	GCA_026333535.1	urine	Greenland	2020
1507	GCA_026333755.1	urine	Greenland	2020
1508	GCA_026334895.1	sputum	Ghana	2020
1509	GCA_026334975.1	swab (cavity)	Ghana	2020
1510	GCA_026335135.1	urine	Ghana	2020
1511	GCA_026335175.1	urine	Ghana	2020
1512	GCA_026341465.1	Skin tissue	China: Jiangsu, Nanjing	2022
1513	GCA_026342805.1	urine	Denmark	2020
1514	GCA_026345695.1	urine	Bulgaria	2020
1515	GCA_026346175.1	urine	Benin	2020
1516	GCA_026346715.1	aspirate	Bangladesh	2020
1517	GCA_026347355.1	urine	Zambia	2020
1518	GCA_026347595.1	urine	Zambia	2020
1519	GCA_026348035.1	urine	Turkey	2020
1520	GCA_026348775.1	urine	Thailand	2020
1521	GCA_026348895.1	swab (wound)	Thailand	2020
1522	GCA_026351575.1	urine	Pakistan	2020
1523	GCA_026352215.1	urine	Saudi Arabia	2020
1524	GCA_026355975.1	urine	Paraguay	2020
1525	GCA_026356075.1	urine	Paraguay	2020
1526	GCA_026356375.1	swab (superficial and non-surgical)	Paraguay	2020
1527	GCA_026356495.1	urine	Paraguay	2020
1528	GCA_026356555.1	urine	Paraguay	2020
1529	GCA_026357195.1	urine	Paraguay	2020
1530	GCA_026357715.1	urine	Paraguay	2020
1531	GCA_026357895.1	urine	Paraguay	2020
1532	GCA_026358135.1	urine	Paraguay	2020
1533	GCA_026359615.1	urine	West Bank	2020
1534	GCA_026360475.1	urine	Australia	2020
1535	GCA_026360535.1	urine	Australia	2020
1536	GCA_026369075.1	human	United Kingdom: United Kingdom	2022
1537	GCA_026375515.1	urine	USA: California	2019
1538	GCA_026375575.1	urine	USA: California	2019
1539	GCA_026375995.1	urine	USA: California	2019
1540	GCA_026376215.1	urine	USA: California	2019
1541	GCA_026376335.1	urine	USA: California	2019
1542	GCA_026376955.1	urine	USA: California	2019
1543	GCA_026377695.1	urine	USA: California	2019
1544	GCA_026377775.1	urine	USA: California	2019
1545	GCA_026377895.1	urine	USA: California	2019
1546	GCA_026378135.1	urine	USA: California	2019
1547	GCA_026378435.1	urine	USA: California	2019
1548	GCA_026378725.1	urine	USA: California	2019
1549	GCA_026378915.1	urine	USA: California	2019
1550	GCA_026379375.1	urine	USA: California	2019
1551	GCA_026379415.1	urine	USA: California	2019
1552	GCA_026381535.1	urine	USA: California	2019
1553	GCA_026381795.1	urine	USA: California	2019
1554	GCA_026382095.1	urine	USA: California	2019
1555	GCA_026382355.1	urine	USA: California	2019
1556	GCA_026382475.1	urine	USA: California	2019
1557	GCA_026382595.1	urine	USA: California	2019
1558	GCA_026382635.1	urine	USA: California	2019
1559	GCA_026383875.1	urine	USA: California	2019
1560	GCA_026383935.1	urine	USA: California	2019
1561	GCA_026383955.1	urine	USA: California	2019
1562	GCA_026384235.1	urine	USA: California	2019
1563	GCA_026384295.1	urine	USA: California	2019
1564	GCA_026384335.1	urine	USA: California	2019
1565	GCA_026384355.1	urine	USA: California	2019
1566	GCA_026385755.1	urine	USA: California	2019
1567	GCA_026385935.1	urine	USA: California	2019
1568	GCA_026386095.1	urine	USA: California	2019
1569	GCA_026386275.1	urine	USA: California	2019
1570	GCA_026386535.1	urine	USA: California	2019
1571	GCA_026386595.1	urine	USA: California	2019
1572	GCA_026386635.1	urine	USA: California	2019
1573	GCA_026423055.1	human	United Kingdom: United Kingdom	2022
1574	GCA_026423215.1	human	United Kingdom: United Kingdom	2022
1575	GCA_026423495.1	human	United Kingdom: United Kingdom	2022
1576	GCA_026486405.1	human	United Kingdom: United Kingdom	2022
1577	GCA_026493265.1	human	United Kingdom: United Kingdom	2022
1578	GCA_026494105.1	human	United Kingdom: United Kingdom	2022
1579	GCA_026498265.1	human	United Kingdom: United Kingdom	2022
1580	GCA_026584705.1	rectal swab	Switzerland	2019
1581	GCA_026584785.1	rectal swab	Switzerland	2019
1582	GCA_026585405.1	rectal swab	Switzerland	2019
1583	GCA_026627645.1	urine	USA	2022
1584	GCA_026646015.1	human	United Kingdom: United Kingdom	2022
1585	GCA_026647915.1	human	United Kingdom: United Kingdom	2022
1586	GCA_026648515.1	human	United Kingdom: United Kingdom	2022
1587	GCA_026648555.1	human	United Kingdom: United Kingdom	2022
1588	GCA_026701185.2	Unknown	USA	2022
1589	GCA_026719865.2	urine	USA	2022
1590	GCA_026764855.1	human	United Kingdom: United Kingdom	2022
1591	GCA_026765795.1	human	United Kingdom: United Kingdom	2022
1592	GCA_026767605.1	human	United Kingdom: United Kingdom	2022
1593	GCA_026805405.1	urine	USA	2022
1594	GCA_026857795.1	human	United Kingdom: United Kingdom	2022
1595	GCA_026915355.1	human	United Kingdom: United Kingdom	2022
1596	GCA_026968065.1	urine	USA: Dallas, Texas	2022
1597	GCA_026968775.1	human	United Kingdom: United Kingdom	2022
1598	GCA_026968935.1	human	United Kingdom: United Kingdom	2022
1599	GCA_027116715.1	human	United Kingdom: United Kingdom	2022
1600	GCA_027167765.1	human	United Kingdom: United Kingdom	2022
1601	GCA_027171265.1	human	United Kingdom: United Kingdom	2022
1602	GCA_027213595.1	urine	Italy: PA Bolzano	2020
1603	GCA_027235165.1	human	United Kingdom: United Kingdom	2022
1604	GCA_027235405.1	human	United Kingdom: United Kingdom	2022
1605	GCA_027235705.1	human	United Kingdom: United Kingdom	2022
1606	GCA_027264035.1	urine isolate	USA	2022
1607	GCA_027337125.1	human	United Kingdom: United Kingdom	2022
1608	GCA_027337515.1	human	United Kingdom: United Kingdom	2022
1609	GCA_027339695.1	human	United Kingdom: United Kingdom	2022
1610	GCA_027358925.1	Human feces	Viet Nam	2019
1611	GCA_027358965.1	Human feces	Viet Nam	2019
1612	GCA_027358985.1	Human feces	Viet Nam	2019
1613	GCA_027361255.1	Human feces	Viet Nam	2019
1614	GCA_027362235.1	Human feces	Viet Nam	2019
1615	GCA_027468245.1	Human feces	Viet Nam	2019
1616	GCA_027468265.1	Human feces	Viet Nam	2019
1617	GCA_027468285.1	Human feces	Viet Nam	2019
1618	GCA_027468345.1	Human feces	Viet Nam	2019
1619	GCA_027474255.1	urine	USA: Dallas, Texas	2022
1620	GCA_027550025.1	human	United Kingdom: United Kingdom	2022
1621	GCA_027607355.1	Gut	Spain: Madrid	2022
1622	GCA_027611285.1	human	United Kingdom: United Kingdom	2022
1623	GCA_027612285.1	human	United Kingdom: United Kingdom	2022
1624	GCA_027795675.1	stool	China: Zhengzhou	2021
1625	GCA_027830815.2	urine	USA	2020
1626	GCA_027887435.1	secretion	China:Jiangsu	2021
1627	GCA_027887515.1	urine	China:Jiangsu	2021
1628	GCA_027887545.1	secretion	China:Jiangsu	2021
1629	GCA_027887595.1	urine	China:Jiangsu	2021
1630	GCA_027887675.1	secretion	China:Jiangsu	2021
1631	GCA_027887895.1	urine	China:Jiangsu	2020
1632	GCA_027887935.1	bile	China:Jiangsu	2020
1633	GCA_027888045.1	secretion	China:Jiangsu	2020
1634	GCA_027888255.1	blood	China:Jiangsu	2019
1635	GCA_027888275.1	urine	China:Jiangsu	2019
1636	GCA_027917585.1	human	United Kingdom: United Kingdom	2023
1637	GCA_027917615.1	human	United Kingdom: United Kingdom	2023
1638	GCA_027945175.1	patient	China: Beijing	2021
1639	GCA_027988435.1	Unknown	France	2019
1640	GCA_027991765.1	human	United Kingdom: United Kingdom	2023
1641	GCA_028004865.1	human	United Kingdom: United Kingdom	2023
1642	GCA_028012825.1	urine	USA	2022
1643	GCA_028016155.2	urine	USA	2023
1644	GCA_028017035.1	human	United Kingdom: United Kingdom	2023
1645	GCA_028049085.3	other	USA	2022
1646	GCA_028049755.1	human	United Kingdom: United Kingdom	2023
1647	GCA_028059755.1	human	United Kingdom: United Kingdom	2023
1648	GCA_028086235.1	human	United Kingdom: United Kingdom	2023
1649	GCA_028167765.1	human	United Kingdom: United Kingdom	2022
1650	GCA_028216775.2	Rectal Swab	USA	2023
1651	GCA_028218415.1	feces	Netherlands	2020
1652	GCA_028219315.1	feces	Netherlands	2020
1653	GCA_028219435.1	feces	Netherlands	2020
1654	GCA_028221245.1	feces	Netherlands	2020
1655	GCA_028221475.1	feces	Netherlands	2020
1656	GCA_028221935.1	feces	Netherlands	2020
1657	GCA_028222415.1	feces	Netherlands	2020
1658	GCA_028222595.1	feces	Netherlands	2020
1659	GCA_028224975.1	feces	Netherlands	2019
1660	GCA_028227895.1	feces	Netherlands	2019
1661	GCA_028229755.1	feces	Netherlands	2019
1662	GCA_028229985.1	feces	Netherlands	2019
1663	GCA_028232945.1	feces	Netherlands	2019
1664	GCA_028233255.1	feces	Netherlands	2019
1665	GCA_028233435.1	feces	Netherlands	2019
1666	GCA_028322345.1	Unknown	USA	2020
1667	GCA_028323245.1	Unknown	USA	2020
1668	GCA_028323505.1	Unknown	USA	2020
1669	GCA_028324975.1	Unknown	USA	2021
1670	GCA_028421485.1	blood	China:Zhuhai	2022
1671	GCA_028464425.1	Unknown	China:Shandong	2021
1672	GCA_028471165.1	urine sample	Switzerland	2019
1673	GCA_028471285.1	urine sample	Switzerland	2019
1674	GCA_028471345.1	urine sample	Switzerland	2019
1675	GCA_028472965.1	urine sample	Switzerland	2019
1676	GCA_028473525.1	urine sample	Switzerland	2019
1677	GCA_028473985.1	urine sample	Switzerland	2019
1678	GCA_028474025.1	urine sample	Switzerland	2019
1679	GCA_028475065.1	urine sample	Switzerland	2019
1680	GCA_028475725.1	urine sample	Switzerland	2019
1681	GCA_028475925.1	urine sample	Switzerland	2019
1682	GCA_028476165.1	urine sample	Switzerland	2019
1683	GCA_028476205.1	urine sample	Switzerland	2019
1684	GCA_028476305.1	urine sample	Switzerland	2019
1685	GCA_028476325.1	urine sample	Switzerland	2019
1686	GCA_028476735.1	urine sample	Switzerland	2019
1687	GCA_028477285.1	urine sample	Switzerland	2019
1688	GCA_028477365.1	urine sample	Switzerland	2019
1689	GCA_028477595.1	urine sample	Switzerland	2019
1690	GCA_028478265.1	urine sample	Switzerland	2019
1691	GCA_028478505.1	urine sample	Switzerland	2019
1692	GCA_028478665.1	urine sample	Switzerland	2019
1693	GCA_028478865.1	urine sample	Switzerland	2019
1694	GCA_028478975.1	urine sample	Switzerland	2019
1695	GCA_028479045.1	urine sample	Switzerland	2019
1696	GCA_028479985.1	urine sample	Switzerland	2019
1697	GCA_028481045.1	urine sample	Switzerland	2019
1698	GCA_028481345.1	urine sample	Switzerland	2019
1699	GCA_028481505.1	urine sample	Switzerland	2019
1700	GCA_028481765.1	urine sample	Switzerland	2019
1701	GCA_028481845.1	urine sample	Switzerland	2019
1702	GCA_028484105.1	urine sample	Switzerland	2019
1703	GCA_028484125.1	urine sample	Switzerland	2019
1704	GCA_028484225.1	urine sample	Switzerland	2019
1705	GCA_028484415.1	urine sample	Switzerland	2019
1706	GCA_028484475.1	urine sample	Switzerland	2019
1707	GCA_028485225.1	urine sample	Switzerland	2019
1708	GCA_028485275.1	urine sample	Switzerland	2019
1709	GCA_028485415.1	urine sample	Switzerland	2019
1710	GCA_028485615.1	urine sample	Switzerland	2019
1711	GCA_028485695.1	urine sample	Switzerland	2019
1712	GCA_028486315.1	urine sample	Switzerland	2019
1713	GCA_028486595.1	urine sample	Switzerland	2019
1714	GCA_028486695.1	urine sample	Switzerland	2019
1715	GCA_028486735.1	urine sample	Switzerland	2019
1716	GCA_028486845.1	urine sample	Switzerland	2019
1717	GCA_028486945.1	urine sample	Switzerland	2019
1718	GCA_028487085.1	urine sample	Switzerland	2019
1719	GCA_028488795.1	urine sample	Switzerland	2019
1720	GCA_028490325.1	urine sample	Switzerland	2020
1721	GCA_028490605.1	urine sample	Switzerland	2020
1722	GCA_028490645.1	urine sample	Switzerland	2020
1723	GCA_028490825.1	urine sample	Switzerland	2020
1724	GCA_028491845.1	urine sample	Switzerland	2020
1725	GCA_028492435.1	urine sample	Switzerland	2020
1726	GCA_028492655.1	urine sample	Switzerland	2020
1727	GCA_028493615.1	urine sample	Switzerland	2020
1728	GCA_028494185.1	urine sample	Switzerland	2020
1729	GCA_028494695.1	urine sample	Switzerland	2020
1730	GCA_028496325.1	urine sample	Switzerland	2020
1731	GCA_028496415.1	urine sample	Switzerland	2020
1732	GCA_028496695.1	urine sample	Switzerland	2020
1733	GCA_028498515.1	blood culture	Switzerland	2019
1734	GCA_028499715.1	blood culture	Switzerland	2019
1735	GCA_028500175.1	blood culture	Switzerland	2019
1736	GCA_028501905.1	blood culture	Switzerland	2019
1737	GCA_028501945.1	blood culture	Switzerland	2019
1738	GCA_028501985.1	blood culture	Switzerland	2019
1739	GCA_028502845.1	blood culture	Switzerland	2019
1740	GCA_028503245.1	blood culture	Switzerland	2019
1741	GCA_028503465.1	blood culture	Switzerland	2019
1742	GCA_028503965.1	blood culture	Switzerland	2019
1743	GCA_028504685.1	urine sample	Switzerland	2019
1744	GCA_028505565.1	urine sample	Switzerland	2020
1745	GCA_028505805.1	urine sample	Switzerland	2020
1746	GCA_028519225.2	urine	USA	2023
1747	GCA_028593835.1	stool	Switzerland	2022
1748	GCA_028594635.1	stool	Switzerland	2022
1749	GCA_028594785.1	stool	Switzerland	2022
1750	GCA_028594895.1	stool	Switzerland	2022
1751	GCA_028594915.1	stool	Switzerland	2022
1752	GCA_028595035.1	stool	Switzerland	2022
1753	GCA_028631805.1	urine	USA	2023
1754	GCA_028632145.1	rectal	China: Hangzhou	2021
1755	GCA_028633625.1	rectal	China: Hangzhou	2021
1756	GCA_028633985.1	Nasointestinal tube	China: Hangzhou	2021
1757	GCA_028633995.1	rectal	China: Hangzhou	2021
1758	GCA_028634305.1	gastric intubation	China: Hangzhou	2021
1759	GCA_028634625.1	rectal	China: Hangzhou	2021
1760	GCA_028634685.1	rectal	China: Hangzhou	2021
1761	GCA_028634895.1	rectal	China: Hangzhou	2021
1762	GCA_028634965.1	rectal	China: Hangzhou	2021
1763	GCA_028635085.1	rectal	China: Hangzhou	2021
1764	GCA_028635095.1	rectal	China: Hangzhou	2021
1765	GCA_028635375.1	rectal	China: Hangzhou	2021
1766	GCA_028635595.1	rectal	China: Hangzhou	2021
1767	GCA_028636155.1	rectal	China: Hangzhou	2021
1768	GCA_028636245.1	rectal	China: Hangzhou	2021
1769	GCA_028636305.1	rectal	China: Hangzhou	2021
1770	GCA_028636585.1	tracheal intubation	China: Hangzhou	2021
1771	GCA_028636785.1	rectal	China: Hangzhou	2021
1772	GCA_028653255.1	rectal	China: Hangzhou	2021
1773	GCA_028653275.1	rectal	China: Hangzhou	2021
1774	GCA_028653285.1	rectal	China: Hangzhou	2021
1775	GCA_028653355.1	rectal	China: Hangzhou	2021
1776	GCA_028653415.1	Nasointestinal tube	China: Hangzhou	2021
1777	GCA_028653465.1	rectal	China: Hangzhou	2021
1778	GCA_028653595.1	rectal	China: Hangzhou	2021
1779	GCA_028653875.1	rectal	China: Hangzhou	2021
1780	GCA_028653935.1	rectal	China: Hangzhou	2021
1781	GCA_028653995.1	rectal	China: Hangzhou	2021
1782	GCA_028654015.1	rectal	China: Hangzhou	2021
1783	GCA_028654095.1	rectal	China: Hangzhou	2021
1784	GCA_028654135.1	rectal	China: Hangzhou	2021
1785	GCA_028654255.1	rectal	China: Hangzhou	2021
1786	GCA_028654275.1	rectal	China: Hangzhou	2021
1787	GCA_028654315.1	rectal	China: Hangzhou	2021
1788	GCA_028654625.1	rectal	China: Hangzhou	2021
1789	GCA_028654735.1	rectal	China: Hangzhou	2021
1790	GCA_028654775.1	rectal	China: Hangzhou	2021
1791	GCA_028654935.1	rectal	China: Hangzhou	2021
1792	GCA_028743335.1	Unknown	USA	2019
1793	GCA_028743355.1	Unknown	USA	2019
1794	GCA_028743555.1	Unknown	USA	2021
1795	GCA_028743755.1	Unknown	USA	2019
1796	GCA_028760565.2	urine	USA	2022
1797	GCA_028830255.1	urine	Australia: nation-wide	2019
1798	GCA_028937305.2	urine	USA	2023
1799	GCA_028957325.1	respiratory	USA	2023
1800	GCA_029035325.1	urine	Saudi Arabia:Riyadh	2019
1801	GCA_029035345.1	urine	Saudi Arabia:Riyadh	2019
1802	GCA_029038945.1	urine	Saudi Arabia:Riyadh	2019
1803	GCA_029070435.1	stool	Lebanon: Beirut	2020
1804	GCA_029070505.1	stool	Lebanon: Beirut	2020
1805	GCA_029070545.1	stool	Lebanon: Beirut	2020
1806	GCA_029075405.1	urine	Lebanon: Bsalim	2020
1807	GCA_029076765.1	fecal sample	USA:Chicago	2022
1808	GCA_029080805.1	urine	USA	2019
1809	GCA_029080875.1	stool	USA	2019
1810	GCA_029086045.1	Rectal swab	France: Paris	2019
1811	GCA_029087265.1	urine	China:Guangdong	2021
1812	GCA_029087305.1	wound	China:Guangdong	2020
1813	GCA_029087385.1	stool	China:Guangdong	2020
1814	GCA_029093625.1	urine	China:Suzhou	2019
1815	GCA_029094105.1	urine	China:Suzhou	2019
1816	GCA_029109395.1	urine	USA	2019
1817	GCA_029113945.1	stool	USA	2019
1818	GCA_029114015.1	urine	USA	2019
1819	GCA_029123075.1	urine	USA	2019
1820	GCA_029123265.1	stool	USA	2019
1821	GCA_029123345.1	urine	USA	2019
1822	GCA_029234535.2	urine	USA	2023
1823	GCA_029274345.2	urine	USA	2023
1824	GCA_029427955.1	rectal	Germany	2019
1825	GCA_029428405.1	urine	Germany	2019
1826	GCA_029429235.1	rectal	Germany	2019
1827	GCA_029433555.1	rectal	Germany	2019
1828	GCA_029436535.1	rectal swab	USA	2023
1829	GCA_029501985.1	not collected	USA: Nashville	2019
1830	GCA_029502125.1	not collected	USA: Nashville	2019
1831	GCA_029502145.1	not collected	USA: Nashville	2019
1832	GCA_029502325.1	not collected	USA: Nashville	2019
1833	GCA_029502545.1	not collected	USA: Nashville	2019
1834	GCA_029502565.1	not collected	USA: Nashville	2019
1835	GCA_029502665.1	not collected	USA: Nashville	2019
1836	GCA_029502825.1	not collected	USA: Nashville	2019
1837	GCA_029502875.1	not collected	USA: Nashville	2019
1838	GCA_029502935.1	not collected	USA: Nashville	2019
1839	GCA_029503055.1	not collected	USA: Nashville	2019
1840	GCA_029505915.1	not collected	USA: Nashville	2019
1841	GCA_029523155.1	stool	China: Zhejiang	2021
1842	GCA_029523195.1	stool	China: Zhejiang	2021
1843	GCA_029523235.1	stool	China: Zhejiang	2020
1844	GCA_029595605.1	urine	USA	2023
1845	GCA_029617565.2	Unknown	USA	2023
1846	GCA_029622735.1	blood	Spain: A Coruna	2021
1847	GCA_029623635.1	blood	Italy: Verona	2022
1848	GCA_029715445.1	urine	Lebanon: Beirut	2021
1849	GCA_029715505.1	urine	Lebanon: Beirut	2020
1850	GCA_029722095.1	pus	China	2020
1851	GCA_029722215.1	pus	China	2019
1852	GCA_029731715.1	urine	USA	2023
1853	GCA_029783205.1	urine	China:Jiangsu	2019
1854	GCA_029824915.1	urine	USA	2023
1855	GCA_029854615.1	sputum	China: Zhuhai	2022
1856	GCA_029877245.1	urine	Japan:Osaka	2019
1857	GCA_029877405.1	urine	Japan:Kyoto	2020
1858	GCA_029878945.1	venous blood	Japan:Kyoto	2019
1859	GCA_029886395.1	venous blood	Japan:Osaka	2019
1860	GCA_029888645.1	urine	Japan:Kyoto	2019
1861	GCA_029888745.1	stool	Japan:Mie	2019
1862	GCA_029889025.1	urine	Japan:Aichi	2019
1863	GCA_029889625.1	urine from catheter	Japan:Aichi	2019
1864	GCA_029889635.1	urine	Japan:Aichi	2020
1865	GCA_029889765.1	urethral secretion	Japan:Shiga	2019
1866	GCA_029903535.1	sputum	China:Guangdong	2020
1867	GCA_029903665.1	blood	China:Guangdong	2020
1868	GCA_029903825.1	sputum	China:Guangdong	2021
1869	GCA_029905705.1	urine	China:Guangdong	2021
1870	GCA_029946995.1	Unknown	China:Guangdong	2020
1871	GCA_029947295.1	Unknown	China:Guangdong	2019
1872	GCA_029947445.1	Unknown	China:Guangdong	2020
1873	GCA_029947585.1	Unknown	China:Guangdong	2020
1874	GCA_029947865.1	urine	China:Beijing	2020
1875	GCA_029948065.1	Unknown	China:Guangdong	2020
1876	GCA_029955675.1	blood	Ecuador: Quito	2022
1877	GCA_029955925.1	blood	Ecuador: Quito	2022
1878	GCA_030024785.1	Unknown	Nigeria	2021
1879	GCA_030024825.1	Unknown	Nigeria	2021
1880	GCA_030130275.1	feces	Ireland	2021
1881	GCA_030130345.1	feces	Ireland	2021
1882	GCA_030130465.1	feces	Ireland	2021
1883	GCA_030132015.1	feces	Ireland	2021
1884	GCA_030132065.1	feces	Ireland	2021
1885	GCA_030132085.1	feces	Ireland	2021
1886	GCA_030143755.1	Unknown	China: Qingdao	2022
1887	GCA_030185365.1	Rectal swab	Australia: Melbourne	2019
1888	GCA_030187725.1	Rectal swab	Australia: Melbourne	2019
1889	GCA_030200615.1	Unknown	Czech Republic	2021
1890	GCA_030200625.1	Unknown	Czech Republic	2021
1891	GCA_030201135.1	Unknown	Czech Republic	2021
1892	GCA_030201295.1	Unknown	Czech Republic	2021
1893	GCA_030201435.1	Unknown	Czech Republic	2021
1894	GCA_030201495.1	Unknown	Czech Republic	2021
1895	GCA_030206215.1	Unknown	Czech Republic	2020
1896	GCA_030283485.1	swab	Australia:Melbourne	2020
1897	GCA_030283925.1	Rectal swab	Australia:Melbourne	2019
1898	GCA_030283945.1	Rectal swab	Australia:Melbourne	2019
1899	GCA_030284005.1	Rectal swab	Australia:Melbourne	2019
1900	GCA_030284365.1	Rectal swab	Australia:Melbourne	2019
1901	GCA_030286115.1	stool	Japan: Tokyo	2022
1902	GCA_030294265.1	urine	Australia:Melbourne	2019
1903	GCA_030294305.1	Rectal swab	Australia:Melbourne	2020
1904	GCA_030294445.1	swab	Australia:Melbourne	2020
1905	GCA_030295055.1	Unknown	Ecuador:SantoDomingo	2019
1906	GCA_030295075.1	Unknown	Ecuador:SantoDomingo	2019
1907	GCA_030324745.1	fecal swab	China	2019
1908	GCA_030324785.1	fecal swab	China	2019
1909	GCA_030324825.1	fecal swab	China	2019
1910	GCA_030324865.1	fecal swab	China	2019
1911	GCA_030324875.1	fecal swab	China	2019
1912	GCA_030324895.1	fecal swab	China	2019
1913	GCA_030324925.1	fecal swab	China	2019
1914	GCA_030324945.1	fecal swab	China	2019
1915	GCA_030325005.1	fecal swab	China	2019
1916	GCA_030325025.1	fecal swab	China	2019
1917	GCA_030325035.1	fecal swab	China	2019
1918	GCA_030325045.1	fecal swab	China	2019
1919	GCA_030325085.1	fecal swab	China	2019
1920	GCA_030325145.1	fecal swab	China	2019
1921	GCA_030325165.1	fecal swab	China	2019
1922	GCA_030325175.1	fecal swab	China	2019
1923	GCA_030325225.1	fecal swab	China	2019
1924	GCA_030325275.1	fecal swab	China	2019
1925	GCA_030325285.1	fecal swab	China	2019
1926	GCA_030325365.1	fecal swab	China	2019
1927	GCA_030325405.1	fecal swab	China	2019
1928	GCA_030374965.1	urine	Uganda: Bwera General Hospital	2020
1929	GCA_030376905.1	urine	Gaza Strip	2021
1930	GCA_030376965.1	sputum	Gaza Strip	2021
1931	GCA_030384845.1	Unknown	China: Hangzhou	2021
1932	GCA_030409125.1	urine	Canada: Toronto	2023
1933	GCA_030409195.1	blood	Canada: Toronto	2023
1934	GCA_030410225.1	clinical	USA: Pittsburgh	2023
1935	GCA_030413765.1	Unknown	China: Guangxi	2021
1936	GCA_030413785.1	Unknown	China: Guangxi	2021
1937	GCA_030413805.1	Unknown	China: Guangxi	2021
1938	GCA_030438435.1	Unknown	China: Guangxi	2021
1939	GCA_030472285.1	Unknown	Canada: Greater Toronto Area	2019
1940	GCA_030473305.1	Unknown	Canada: Greater Toronto Area	2020
1941	GCA_030473345.1	Unknown	Canada: Greater Toronto Area	2020
1942	GCA_030473905.1	Unknown	Canada: Greater Toronto Area	2020
1943	GCA_030475045.1	Unknown	Canada: Greater Toronto Area	2019
1944	GCA_030506645.1	Unknown	USA	2022
1945	GCA_030507885.1	Unknown	USA	2021
1946	GCA_030507895.1	Unknown	USA	2021
1947	GCA_030508255.1	Unknown	USA	2021
1948	GCA_030508285.1	Unknown	USA	2021
1949	GCA_030508405.1	Unknown	USA	2021
1950	GCA_030508635.1	Unknown	USA	2021
1951	GCA_030509085.1	Unknown	USA	2021
1952	GCA_030509325.1	Unknown	USA	2021
1953	GCA_030509375.1	Unknown	USA	2021
1954	GCA_030509405.1	Unknown	USA	2021
1955	GCA_030510205.1	rectal swab	Afghanistan	2019
1956	GCA_030510225.1	rectal swab	Afghanistan	2019
1957	GCA_030510315.1	rectal swab	Afghanistan	2019
1958	GCA_030510355.1	rectal swab	Afghanistan	2019
1959	GCA_030510415.1	rectal swab	Afghanistan	2019
1960	GCA_030510505.1	rectal swab	Afghanistan	2019
1961	GCA_030510525.1	rectal swab	Afghanistan	2019
1962	GCA_030510545.1	rectal swab	Afghanistan	2019
1963	GCA_030510565.1	rectal swab	Afghanistan	2019
1964	GCA_030510585.1	rectal swab	Afghanistan	2019
1965	GCA_030510635.1	rectal swab	Afghanistan	2019
1966	GCA_030510685.1	rectal swab	Afghanistan	2019
1967	GCA_030510865.1	rectal swab	Afghanistan	2019
1968	GCA_030510925.1	rectal swab	Afghanistan	2019
1969	GCA_030510965.1	rectal swab	Afghanistan	2019
1970	GCA_030511045.1	rectal swab	Afghanistan	2019
1971	GCA_030511125.1	rectal swab	Afghanistan	2019
1972	GCA_030511135.1	rectal swab	Afghanistan	2019
1973	GCA_030511225.1	rectal swab	Afghanistan	2019
1974	GCA_030511285.1	rectal swab	Afghanistan	2019
1975	GCA_030511505.1	rectal swab	Afghanistan	2019
1976	GCA_030511535.1	rectal swab	Afghanistan	2019
1977	GCA_030511565.1	rectal swab	Afghanistan	2019
1978	GCA_030511645.1	rectal swab	Afghanistan	2019
1979	GCA_030511665.1	rectal swab	Afghanistan	2019
1980	GCA_030511675.1	rectal swab	Afghanistan	2019
1981	GCA_030511725.1	rectal swab	Afghanistan	2019
1982	GCA_030511755.1	rectal swab	Afghanistan	2019
1983	GCA_030511805.1	rectal swab	Afghanistan	2019
1984	GCA_030511845.1	rectal swab	Afghanistan	2019
1985	GCA_030511985.1	rectal swab	Afghanistan	2019
1986	GCA_030515355.1	CSF	Australia	2019
1987	GCA_030518525.1	urine	France:Paris	2021
1988	GCA_030541435.1	patient	China	2023
1989	GCA_030552915.1	urine	China: Sanmen	2022
1990	GCA_030700345.1	urine	USA	2023
1991	GCA_030707525.1	Perianal swab	Lebanon	2021
1992	GCA_030707795.1	Perianal swab	Lebanon	2021
1993	GCA_030712295.1	feces	China	2022
1994	GCA_030712335.1	feces	China	2022
1995	GCA_030712375.1	feces	China	2022
1996	GCA_030712435.1	feces	China	2020
1997	GCA_030712455.1	feces	China	2022
1998	GCA_030712495.1	feces	China	2021
[truncated: 702 more rows]

## Sheet:  S7c
Table S7c: Metadata of clinical K. pneumoniae isolates from NCBI database
S. No.	Assembly	Sample source	Location	Year of collection
1	GCA_007421875.2	Unknown	USA: Gainesville	2019
2	GCA_008632115.1	blood	China:Hangzhou	2019
3	GCA_022208785.1	Rectal swab	Ireland	2019
4	GCA_011044835.1	urine	Russia: Saint-Petersburg	2019
5	GCA_011742285.2	blood	India	2019
6	GCA_011742505.2	blood	India	2019
7	GCA_011769805.1	urine	Czech Republic: Prague	2019
8	GCA_011769825.1	Rectal swab	Czech Republic: Prague	2019
9	GCA_013187705.1	hospital-2, OP, stool #2	Nigeria	2019
10	GCA_013280475.1	Unknown	Lebanon	2019
11	GCA_013392185.1	rectal swab	Switzerland	2019
12	GCA_013392195.1	rectal swab	Switzerland	2019
13	GCA_022170205.2	urine	USA	2019
14	GCA_022170225.2	urine	USA	2019
15	GCA_022170155.1	urine	USA	2020
16	GCA_022170445.2	urine	USA	2019
17	GCA_014655795.1	Unknown	China: Chengdu, Sichuan	2019
18	GCA_014655455.2	Unknown	China: Chengdu, Sichuan	2019
19	GCA_014673015.1	blood	India	2019
20	GCA_014833545.1	clinical	USA: Pittsburgh, PA	2019
21	GCA_014833645.1	clinical	USA: Pittsburgh, PA	2019
22	GCA_022143965.2	Unknown	USA	2020
23	GCA_014961485.1	blood culture from maile	China	2019
24	GCA_014982705.1	stool	Spain	2019
25	GCA_015159775.2	blood	India	2019
26	GCA_015278375.1	Taichung Veterans General Hospital	Taiwan	2019
27	GCA_015278405.1	Taichung Veterans General Hospital	Taiwan	2019
28	GCA_015278505.1	Taichung Veterans General Hospital	Taiwan	2019
29	GCA_015318225.2	blood	China: Chengdu, Sichuan	2020
30	GCA_022039135.2	rectal swab	USA	2019
31	GCA_015666635.1	blood	Brazil	2019
32	GCA_015666685.1	blood	Brazil	2020
33	GCA_022034215.2	rectal swab isolate	USA	2019
34	GCA_022033535.2	stool isolate	USA	2019
35	GCA_022033475.2	rectal swab	USA	2019
36	GCA_022033415.2	rectal swab	USA	2019
37	GCA_022033395.1	rectal swab	USA	2020
38	GCA_022033375.1	Bile Fluid	USA	2020
39	GCA_015718015.1	sputum	USA: Pittsburgh, Pennsylvania	2019
40	GCA_015718145.1	blood	USA: Pittsburgh, Pennsylvania	2019
41	GCA_015718445.1	sputum	USA: Pittsburgh, Pennsylvania	2019
42	GCA_015718975.1	urine	USA: Pittsburgh, Pennsylvania	2019
43	GCA_016055215.1	blood	Brazil	2020
44	GCA_016055655.1	blood	Brazil	2020
45	GCA_031040175.1	urine	USA	2020
46	GCA_016735035.1	Clinical Lab	Australia	2019
47	GCA_016735065.1	Clinical Lab	Australia	2019
48	GCA_016735105.1	Clinical Lab	Australia	2019
49	GCA_016762115.1	urine	Bangladesh	2019
50	GCA_016762175.1	urine	Bangladesh	2019
51	GCA_016762395.1	urine	Bangladesh	2019
52	GCA_016762515.1	urine	Bangladesh	2019
53	GCA_016762665.1	blood	India	2019
54	GCA_031040075.1	Blood specimen	USA	2020
55	GCA_031039995.1	Sputum specimen	USA	2020
56	GCA_016800965.1	urine	China:Hengyang, Hunan	2019
57	GCA_022016855.1	Rectal swab	Qatar:Doha	2019
58	GCA_022016815.1	urine	Qatar:Doha	2019
59	GCA_022016775.1	Rectal swab	Qatar:Doha	2019
60	GCA_022016795.1	Rectal swab	Qatar:Doha	2019
61	GCA_016916625.1	feces	Russia: Moscow region	2019
62	GCA_016939775.1	sputum	Czech Republic: Nymburk	2019
63	GCA_017164115.1	feces	Singapore	2019
64	GCA_017743115.1	sputum	China:Zhanjiang	2020
65	GCA_017743135.1	sputum	China:Zhanjiang	2020
66	GCA_017815715.1	sputum	China:Zhanjiang	2020
67	GCA_021988315.2	wound	USA	2021
68	GCA_021980775.1	Rectal swab	Qatar:Doha	2020
69	GCA_018128465.1	outer malleolus	Switzerland	2020
70	GCA_021973695.2	sputum	USA	2020
71	GCA_018142925.1	Unknown	Lebanon	2019
72	GCA_021971375.1	Urine specimen	USA	2021
73	GCA_021970975.2	Blood specimen	USA	2021
74	GCA_018274705.1	stool	China: Zhengzhou	2019
75	GCA_018274725.1	stool	China: Zhengzhou	2019
76	GCA_018274805.1	stool	China: Zhengzhou	2019
77	GCA_018274915.1	stool	China: Zhengzhou	2019
78	GCA_018274945.1	stool	China: Zhengzhou	2019
79	GCA_018274985.1	stool	China: Zhengzhou	2019
80	GCA_018275035.1	stool	China: Zhengzhou	2019
81	GCA_018275105.1	stool	China: Zhengzhou	2019
82	GCA_018275165.1	stool	China: Zhengzhou	2019
83	GCA_018275235.1	stool	China: Zhengzhou	2019
84	GCA_018275265.1	stool	China: Zhengzhou	2019
85	GCA_018275295.1	stool	China: Zhengzhou	2019
86	GCA_021946615.1	rectal	USA: Chicago, IL	2019
87	GCA_021945375.1	rectal	USA: Chicago, IL	2019
88	GCA_018383785.2	trachea	Russia: Moscow	2019
89	GCA_018420865.1	Rectal swab/stool	Germany	2019
90	GCA_018423085.1	Rectal swab/stool	Germany	2019
91	GCA_018423385.2	Nose throat swab	Germany	2019
92	GCA_018446475.2	Rectal swab/stool	Germany	2019
93	GCA_018446875.2	Rectal swab/stool	Germany	2019
94	GCA_018454365.1	hospital	China: Lushi County, Sanmenxia City, Henan Provience	2021
95	GCA_018623105.1	balf	China: Bejing	2020
96	GCA_021938935.1	hospital	Germany	2019
97	GCA_021938835.1	hospital	Germany	2019
98	GCA_021938755.1	hospital	Germany	2019
99	GCA_021938595.1	hospital	Germany	2019
100	GCA_021938515.2	blood	USA	2021
101	GCA_019049935.1	urine	USA: Boston, MA	2019
102	GCA_019050875.1	urine	China: Xuzhou	2019
103	GCA_019104125.1	Unknown	China	2020
104	GCA_021933995.1	urine	Australia	2019
105	GCA_021933395.1	swab	Australia	2020
106	GCA_021933075.1	swab	Australia	2020
107	GCA_021932955.1	feces	Australia	2020
108	GCA_021932995.1	swab	Australia	2020
109	GCA_021932675.1	Fluid	Australia	2019
110	GCA_021932275.1	Blood (whole)	Australia	2019
111	GCA_021931895.1	swab	Australia	2019
112	GCA_021931695.1	Urine, mid stream	Australia	2019
113	GCA_021931635.1	Blood (whole)	Australia	2019
114	GCA_021931475.1	swab	Australia	2019
115	GCA_021931415.1	urine	Australia	2019
116	GCA_021930855.1	swab	Australia	2019
117	GCA_021930835.1	swab	Australia	2019
118	GCA_019443545.1	blood	China:wuxi	2019
119	GCA_019730735.1	feces	China	2020
120	GCA_019793835.1	Unknown	China: Changsha	2019
121	GCA_019837365.1	blood	India	2019
122	GCA_019915325.1	Swab from Pharynx	Kazakhstan: Almaty	2021
123	GCA_019915345.1	Swab from tracheostomic tube	Kazakhstan: Almaty	2021
124	GCA_019927285.1	urine	USA: District of Columbia	2020
125	GCA_019927485.1	urine	USA: District of Columbia	2019
126	GCA_019927505.1	urine	USA: District of Columbia	2019
127	GCA_021906615.2	blood	USA	2021
128	GCA_020080145.1	secretion	China:Yongchuan District, Chongqing	2020
129	GCA_916162115.1	clinical sample	Netherlands	2019
130	GCA_916164395.1	clinical sample	Netherlands	2019
131	GCA_916172525.1	blood	Netherlands	2020
132	GCA_916172485.1	blood	Netherlands	2019
133	GCA_916172795.1	blood	Netherlands	2019
134	GCA_916172745.1	blood	Netherlands	2019
135	GCA_916173065.1	blood	Netherlands	2020
136	GCA_916173095.1	blood	Netherlands	2019
137	GCA_916173335.1	blood	Netherlands	2020
138	GCA_916175255.1	blood	Netherlands	2019
139	GCA_916175885.1	blood	Netherlands	2019
140	GCA_021904355.2	Urinary catheter specimen	USA	2021
141	GCA_021904215.1	blood	USA:MA	2020
142	GCA_020251495.1	not collected	China: Beijing city	2020
143	GCA_020251625.1	not collected	China: Beijing city	2020
144	GCA_020251665.1	not collected	China: Beijing city	2020
145	GCA_020251705.1	not collected	China: Beijing city	2020
146	GCA_021904095.1	Abscess; pelvis	USA	2021
147	GCA_020478435.1	Unknown	China: Beijing	2019
148	GCA_020478635.1	Unknown	China: Beijing	2019
149	GCA_020478655.1	Unknown	China: Beijing	2019
150	GCA_020515075.1	sputum	Thailand: Samut Sakhon	2020
151	GCA_020515095.1	blood	Thailand: Nakhon Phanom	2019
152	GCA_021903495.2	urine	USA	2021
153	GCA_021903735.2	Bacterial isolate specimen	USA	2021
154	GCA_021902855.1	Rectal Swab	USA	2021
155	GCA_021902655.2	Bacterial isolate specimen	USA	2019
156	GCA_021902535.2	urine	USA	2019
157	GCA_021902415.1	Unknown	Japan:Aichi	2019
158	GCA_028063235.1	wound	USA	2020
159	GCA_020695545.1	urine	Czech Republic: Prague	2020
160	GCA_021899395.1	pus	China:Shandong province	2019
161	GCA_021899155.1	sputum	China:Shandong province	2019
162	GCA_021898635.1	Wound; elbow left	USA	2019
163	GCA_021898255.2	urine	USA	2020
164	GCA_021898235.1	urine	USA	2020
165	GCA_020808985.1	feces	China:Shanghai	2020
166	GCA_028062295.2	blood	USA	2021
167	GCA_020858915.1	Unknown	USA	2019
168	GCA_020859095.1	Unknown	USA	2019
169	GCA_020991145.1	sputum	China: Yangzhou	2020
170	GCA_021897075.2	Bacterial isolate specimen	USA	2021
171	GCA_021880355.2	urine	USA	2021
172	GCA_021880255.2	blood	USA	2021
173	GCA_021822905.1	ascites fluid	USA: New York, Monroe County	2019
174	GCA_021824265.1	ascites fluid	USA: New York, Monroe County	2019
175	GCA_021822345.1	bone	USA: New York, Monroe County	2019
176	GCA_021821685.1	spine	USA: New York, Monroe County	2019
177	GCA_021821345.1	lung	USA: New York, Monroe County	2019
178	GCA_021879375.1	Faeces or rectal swab	United Kingdom:Birmingham	2019
179	GCA_021879295.1	Faeces or rectal swab	United Kingdom:Birmingham	2019
180	GCA_021879135.1	Faeces or rectal swab	United Kingdom:Birmingham	2019
181	GCA_021878955.1	Faeces or rectal swab	United Kingdom:Birmingham	2019
182	GCA_021878615.1	hospital	Netherlands	2019
183	GCA_021878435.1	hospital	Netherlands	2019
184	GCA_021137955.1	urine	Switzerland	2020
185	GCA_021137975.1	urine	Switzerland	2020
186	GCA_021870765.2	Rectal Swab	USA	2021
187	GCA_021865455.1	Deep Tissue	Switzerland	2019
188	GCA_021854435.1	blood	USA	2021
189	GCA_028061955.2	tracheal aspirate	USA	2019
190	GCA_922823995.1	blood	United Kingdom	2019
191	GCA_922823845.1	Screen swab	United Kingdom	2019
192	GCA_922827155.1	urine	United Kingdom	2020
193	GCA_922826965.1	blood	United Kingdom	2019
194	GCA_922831335.1	Screen swab	United Kingdom	2019
195	GCA_021229995.1	sputum from COVID-19 patient	Russia: Sakha (Yakutia)	2021
196	GCA_021245835.1	urine	Brazil: Sao Paulo	2019
197	GCA_021850065.1	Unknown	Japan:Fukuoka	2019
198	GCA_021850045.1	Unknown	Japan:Fukuoka	2019
199	GCA_021849885.1	Unknown	Japan:Fukuoka	2019
200	GCA_021849245.1	Unknown	Japan:Fukuoka	2019
201	GCA_021848685.1	throat swab	Germany: Leipzig	2019
202	GCA_021843095.2	urine	USA	2021
203	GCA_021918865.1	sputum	India: New Delhi	2019
204	GCA_021909735.1	sputum	India: New Delhi	2019
205	GCA_021840115.1	Unknown	Switzerland	2020
206	GCA_021838345.1	Unknown	Switzerland	2019
207	GCA_021837445.1	Unknown	Switzerland	2019
208	GCA_021840365.1	Unknown	Switzerland	2020
209	GCA_021836905.1	Unknown	Switzerland	2020
210	GCA_021821245.1	hospital	Germany	2020
211	GCA_021821105.1	hospital	Germany	2020
212	GCA_021821165.1	hospital	Germany	2020
213	GCA_021820415.1	hospital	Germany	2020
214	GCA_021389995.1	sputum	China:Luzhou	2019
215	GCA_021390015.1	sputum	China:Luzhou	2020
216	GCA_021816285.2	urine	USA	2021
217	GCA_021455325.1	blood	China:Beijing	2019
218	GCA_021455465.1	blood	China:Beijing	2019
219	GCA_021455505.1	blood	China:Beijing	2019
220	GCA_021460155.1	Unknown	Nigeria	2019
221	GCA_021460435.1	Unknown	Ghana	2021
222	GCA_021460925.1	Unknown	Nigeria	2020
223	GCA_021460965.1	Unknown	Nigeria	2020
224	GCA_021814375.3	blood	USA	2021
225	GCA_021814305.3	abdomen	USA	2021
226	GCA_028061715.2	urine	USA	2021
227	GCA_021519835.1	blood	China:Beijing	2019
228	GCA_021809065.2	Unknown	USA	2021
229	GCA_021808905.1	Unknown	USA	2021
230	GCA_021535105.1	sputum	China: Beijing	2020
231	GCA_021774365.2	bronchial	USA	2021
232	GCA_022014415.1	anal swab	China	2021
233	GCA_022028875.1	blood	India	2019
234	GCA_022028915.1	blood	India	2019
235	GCA_022028995.1	blood	India	2020
236	GCA_022029055.1	blood	India	2020
237	GCA_022112695.1	urine	Netherlands	2019
238	GCA_022116535.1	urine	Netherlands	2019
239	GCA_022114875.1	Rectum swab	Netherlands	2019
240	GCA_022113455.1	urine	Netherlands	2019
241	GCA_022114315.1	urine	Netherlands	2019
242	GCA_022114815.1	Perineum swab	Netherlands	2019
243	GCA_022113695.1	urine	Netherlands	2019
244	GCA_022111975.1	urine	Netherlands	2019
245	GCA_022308415.1	Unknown	Kenya: Nairobi	2019
246	GCA_022303835.1	Unknown	Kenya: Nairobi	2019
247	GCA_022308315.1	Unknown	Kenya: Nairobi	2019
248	GCA_022302715.1	Unknown	Kenya: Nairobi	2019
249	GCA_022308135.1	Unknown	Kenya: Nairobi	2019
250	GCA_022308055.1	Unknown	Kenya: Nairobi	2019
251	GCA_022308035.1	Unknown	Kenya: Nairobi	2019
252	GCA_022307895.1	Unknown	Kenya: Nairobi	2019
253	GCA_022303715.1	Unknown	Kenya: Nairobi	2019
254	GCA_022303695.1	Unknown	Kenya: Nairobi	2019
255	GCA_022306635.1	Unknown	Kenya: Nairobi	2019
256	GCA_022303655.1	Unknown	Kenya: Nairobi	2019
257	GCA_022306595.1	Unknown	Kenya: Nairobi	2019
258	GCA_022302575.1	Unknown	Kenya: Nairobi	2019
259	GCA_022303595.1	Unknown	Kenya: Nairobi	2019
260	GCA_022363335.2	urine	USA	2021
261	GCA_022383575.2	Unknown	USA	2022
262	GCA_028060935.1	CT Picc Line	USA	2022
263	GCA_022402285.1	blood	China:Yantai	2019
264	GCA_022446065.1	urine	USA	2021
265	GCA_022466735.1	rectal swab	USA	2021
266	GCA_022470135.2	urine	USA	2021
267	GCA_022472575.2	trach swab	USA	2021
268	GCA_022474975.1	Wound/Abscess	USA	2022
269	GCA_022501125.1	Unknown	China:Yantai	2019
270	GCA_022539425.1	Sputum specimen	China:Taizhou	2019
271	GCA_022550085.1	Unknown	Egypt	2019
272	GCA_022555535.1	Unknown	Russia: Moscow	2020
273	GCA_022592575.1	Unknown	China: Yunnan	2020
274	GCA_022592735.1	blood	China:Luzhou	2021
275	GCA_022605205.1	blood	India:New Delhi	2019
276	GCA_022693965.1	wound	USA	2021
277	GCA_022699345.1	skin swab	Turkey: Kayseri	2019
278	GCA_022760615.1	Unknown	China:Shanghai	2020
279	GCA_022760675.1	Unknown	China:Shanghai	2020
280	GCA_022853825.1	Unknown	China: Liaoning	2019
281	GCA_022855245.1	Unknown	China: Shandong	2019
282	GCA_022855315.1	Unknown	China: Zhejiang	2019
283	GCA_022855765.1	Unknown	China: Zhejiang	2019
284	GCA_022855905.1	Unknown	China: Hubei	2019
285	GCA_022856155.1	Unknown	China: Anhui	2019
286	GCA_022857145.1	Unknown	China: Zhejiang	2019
287	GCA_022858185.1	Unknown	China: Hubei	2019
288	GCA_022859045.1	Unknown	China: Zhejiang	2019
289	GCA_022859685.1	Unknown	China: Anhui	2019
290	GCA_022963975.2	blood	USA	2022
291	GCA_023036575.1	Unknown	China:Shanghai	2019
292	GCA_023036195.1	Urethral swab to possible find out bacterial colonizzation	Italy: Rome	2021
293	GCA_023036215.1	Blood from patient with systemic infection	Italy: Rome	2021
294	GCA_023033755.1	Urine - MSU	Australia: Melbourne	2020
295	GCA_023033685.1	Urine - Bag	Australia: Melbourne	2020
296	GCA_023033615.1	Blood Peripheral	Australia: Melbourne	2020
297	GCA_023033635.1	blood	Australia: Melbourne	2020
298	GCA_023033555.1	blood	Australia: Melbourne	2020
299	GCA_023033295.1	blood	Australia: Melbourne	2020
300	GCA_023033245.1	urine	Australia: Melbourne	2020
301	GCA_023033035.1	wound	Australia: Melbourne	2020
302	GCA_023033065.1	Urine - MSU	Australia: Melbourne	2020
303	GCA_023032975.1	blood	Australia: Melbourne	2020
304	GCA_023032795.1	Hickman red lumen	Australia: Melbourne	2020
305	GCA_023032735.1	Endotrachial Tube	Australia: Melbourne	2020
306	GCA_023032545.1	urine	Australia: Melbourne	2020
307	GCA_023032525.1	Urine - Catheter	Australia: Melbourne	2020
308	GCA_023030425.1	urine	Australia: Melbourne	2020
309	GCA_023032425.1	Urine - Cystoscopy	Australia: Melbourne	2020
310	GCA_023032465.1	tracheal aspirate	Australia: Melbourne	2020
311	GCA_023032345.1	other	Australia: Melbourne	2020
312	GCA_023032325.1	Burn	Australia: Melbourne	2020
313	GCA_023030305.1	sputum	Australia: Melbourne	2020
314	GCA_023032145.1	Biopsy	Australia: Melbourne	2020
315	GCA_023032105.1	Blood Peripheral	Australia: Melbourne	2020
316	GCA_023032065.1	urine	Australia: Melbourne	2020
317	GCA_023030165.1	urine	Australia: Melbourne	2020
318	GCA_023032005.1	urine	Australia: Melbourne	2020
319	GCA_023031965.1	Urine - MSU	Australia: Melbourne	2020
320	GCA_023031885.1	Hick Brown Lumen	Australia: Melbourne	2020
321	GCA_023031845.1	urine	Australia: Melbourne	2020
322	GCA_023029965.1	urine	Australia: Melbourne	2020
323	GCA_023029925.1	urine	Australia: Melbourne	2020
324	GCA_023029905.1	blood	Australia: Melbourne	2020
325	GCA_023031685.1	urine	Australia: Melbourne	2020
326	GCA_023029805.1	Fluid - Pancreas	Australia: Melbourne	2020
327	GCA_023029745.1	Central Line	Australia: Melbourne	2020
328	GCA_023031645.1	urine	Australia: Melbourne	2020
329	GCA_023031525.1	wound	Australia: Melbourne	2020
330	GCA_023029685.1	wound	Australia: Melbourne	2020
331	GCA_023029645.1	urine	Australia: Melbourne	2020
332	GCA_023029585.1	urine	Australia: Melbourne	2020
333	GCA_023029605.1	Abscess	Australia: Melbourne	2020
334	GCA_023465715.1	Fluid - Bile	Australia: Melbourne	2020
335	GCA_023465615.1	urine	Australia: Melbourne	2020
336	GCA_023029405.1	Burn	Australia: Melbourne	2020
337	GCA_023031705.1	urine	Australia: Melbourne	2020
338	GCA_023465595.1	Urine - Catheter	Australia: Melbourne	2020
339	GCA_023031105.1	blood	Australia: Melbourne	2020
340	GCA_023031595.1	blood	Australia: Melbourne	2020
341	GCA_023031625.1	urine	Australia: Melbourne	2020
342	GCA_023029185.1	Blood Venous	Australia: Melbourne	2020
343	GCA_023465575.1	Fluid - Pleural	Australia: Melbourne	2020
344	GCA_023030985.1	Blood PICC Line	Australia: Melbourne	2020
345	GCA_023046795.1	urine	Australia: Melbourne	2020
346	GCA_023029445.1	Endotrachial Tube	Australia: Melbourne	2020
347	GCA_023029025.1	urine	Australia: Melbourne	2020
348	GCA_023030885.1	blood	Australia: Melbourne	2020
349	GCA_023029305.1	urine	Australia: Melbourne	2020
350	GCA_023028975.1	urine	Australia: Melbourne	2020
351	GCA_023030765.1	urine	Australia: Melbourne	2020
352	GCA_023030725.1	urine	Australia: Melbourne	2020
353	GCA_023028845.1	Blood Venous	Australia: Melbourne	2020
354	GCA_023030605.1	blood	Australia: Melbourne	2020
355	GCA_023028865.1	blood	Australia: Melbourne	2020
356	GCA_023028525.1	Endotrachial Tube	Australia: Melbourne	2020
357	GCA_023028785.1	Blood Venou	Australia: Melbourne	2020
358	GCA_023028385.1	urine	Australia: Melbourne	2020
359	GCA_023028725.1	swab	Australia: Melbourne	2020
360	GCA_023028065.1	Burn	Australia: Melbourne	2020
361	GCA_023028025.1	blood	Australia: Melbourne	2020
362	GCA_023027985.1	BAL	Australia: Melbourne	2020
363	GCA_023027965.1	urine	Australia: Melbourne	2020
364	GCA_023027925.1	Hickman Catheter	Australia: Melbourne	2020
365	GCA_023027785.1	urine	Australia: Melbourne	2020
366	GCA_023028545.1	Urine - Catheter	Australia: Melbourne	2020
367	GCA_023027365.1	urine	Australia: Melbourne	2020
368	GCA_023027185.1	urine	Australia: Melbourne	2020
369	GCA_023027045.1	urine	Australia: Melbourne	2020
370	GCA_023027005.1	sputum	Australia: Melbourne	2020
371	GCA_023026945.1	Urine - Catheter	Australia: Melbourne	2020
372	GCA_023026905.1	blood	Australia: Melbourne	2020
373	GCA_023026765.1	urine	Australia: Melbourne	2020
374	GCA_023026705.1	Urine - MSU	Australia: Melbourne	2020
375	GCA_023026745.1	urine	Australia: Melbourne	2020
376	GCA_023026205.1	bloodstream	Turkey: Ankara	2019
377	GCA_023025885.1	bloodstream	Turkey: Istanbul	2019
378	GCA_023023345.1	bloodstream	Turkey: Ankara	2019
379	GCA_022968255.1	rectal	Ghana: Kumasi	2021
380	GCA_022968285.1	rectal	Ghana: Kumasi	2021
381	GCA_023118675.2	Unknown	USA	2022
382	GCA_023093995.1	sputum	China:Zhuhai	2021
383	GCA_023146815.1	clinical	Lebanon	2020
384	GCA_023315975.1	clinical sample	USA: Ann Arbor, Michigan	2019
385	GCA_023343595.1	hospital	Germany	2021
386	GCA_023345545.1	hospital	Germany	2021
387	GCA_023353695.1	Unknown	China:Beijing	2022
388	GCA_023518335.1	blood	India	2019
389	GCA_023544325.1	stool	Nigeria: Osun State, Ede	2020
390	GCA_023565125.2	urine	USA	2022
391	GCA_023598965.1	Perianal Swab	Australia:Queensland	2019
392	GCA_023617105.1	Scalp Wound Swab	Australia:Queensland	2019
393	GCA_023584565.1	Rectal Swab	Australia:Queensland	2019
394	GCA_023590605.1	Rectal Swab	Australia:Queensland	2019
395	GCA_023594505.1	Rectal Swab	Australia:Queensland	2019
396	GCA_023582825.1	blood	Australia:Queensland	2019
397	GCA_023595125.1	Rectum Swab	Australia:Queensland	2019
398	GCA_023582185.1	blood	Australia:Queensland	2019
399	GCA_023585485.1	urine	Australia:Queensland	2019
400	GCA_023597305.1	Rectal Swab	Australia:Queensland	2019
401	GCA_023611485.1	Bronchial Washings	Australia:Queensland	2019
402	GCA_023584165.1	Rectal Swab	Australia:Queensland	2019
403	GCA_023589825.1	Rectal Swab	Australia:Queensland	2019
404	GCA_023603765.1	blood	Australia:Queensland	2019
405	GCA_023603985.1	Wound Swab	Australia:Queensland	2019
406	GCA_023602565.1	Rectal Swab	Australia:Queensland	2019
407	GCA_023616025.1	Rectal Swab	Australia:Queensland	2019
408	GCA_023573705.1	Unknown	China	2022
409	GCA_024111135.1	Perianal Swab	Australia:Queensland	2020
410	GCA_023673265.1	Rectal Swab	Australia:Queensland	2020
411	GCA_023761385.1	Rectal Swab	Australia:Queensland	2020
412	GCA_023677645.1	Rectal Swab	Australia:Queensland	2021
413	GCA_023674745.1	Rectal Swab	Australia:Queensland	2021
414	GCA_023690485.1	Rectal Swab	Australia:Queensland	2020
415	GCA_023793875.1	urine	USA	2021
416	GCA_023700325.1	urine	China:69 Yongding Road, Haidian District, Beijing	2022
417	GCA_023700335.1	urine	China:69 Yongding Road, Haidian District, Beijing	2022
418	GCA_023700405.1	urine	China:69 Yongding Road, Haidian District, Beijing	2022
419	GCA_023700505.1	urine	China:69 Yongding Road, Haidian District, Beijing	2022
420	GCA_023700625.1	urine	China:69 Yongding Road, Haidian District, Beijing	2022
421	GCA_023700655.1	urine	China:69 Yongding Road, Haidian District, Beijing	2022
422	GCA_023755965.2	Rectal Swab	USA	2022
423	GCA_023815405.2	urine	USA	2021
424	GCA_023738935.1	bile	China:Beijing	2021
425	GCA_023739025.1	blood	China:Beijing	2021
426	GCA_023739015.1	blood	China:Beijing	2021
427	GCA_023739115.1	bile	China:Beijing	2021
428	GCA_023739155.1	ascites	China:Beijing	2021
429	GCA_023739175.1	ascites	China:Beijing	2021
430	GCA_023739195.1	blood	China:Beijing	2021
431	GCA_023739215.1	blood	China:Beijing	2021
432	GCA_023739275.1	blood	China:Beijing	2021
433	GCA_023739335.1	bile	China:Beijing	2021
434	GCA_023739355.1	blood	China:Beijing	2021
435	GCA_023739555.1	ascites	China:Beijing	2020
436	GCA_023739725.1	bile	China:Beijing	2020
437	GCA_023739815.1	blood	China:Beijing	2020
438	GCA_023739835.1	bile	China:Beijing	2020
439	GCA_023739875.1	bile	China:Beijing	2020
440	GCA_023739905.1	blood	China:Beijing	2020
441	GCA_023739975.1	ascites	China:Beijing	2020
442	GCA_023739995.1	blood	China:Beijing	2020
443	GCA_023740015.1	blood	China:Beijing	2020
444	GCA_023740055.1	ascites	China:Beijing	2020
445	GCA_023740075.1	bile	China:Beijing	2020
446	GCA_023740115.1	blood	China:Beijing	2020
447	GCA_023740125.1	blood	China:Beijing	2020
448	GCA_023740195.1	bile	China:Beijing	2020
449	GCA_023740215.1	ascites	China:Beijing	2020
450	GCA_023740535.1	blood	China:Beijing	2019
451	GCA_023740835.1	blood	China:Beijing	2019
452	GCA_023740925.1	blood	China:Beijing	2019
453	GCA_023740975.1	ascites	China:Beijing	2019
454	GCA_023741455.1	blood	China:Beijing	2021
455	GCA_023741675.1	bile	China:Beijing	2021
456	GCA_023741695.1	blood	China:Beijing	2021
457	GCA_023741835.1	bile	China:Beijing	2021
458	GCA_023742035.1	blood	China:Beijing	2020
459	GCA_023742095.1	blood	China:Beijing	2020
460	GCA_023742175.1	liver abscess	China:Beijing	2020
461	GCA_023742425.1	blood	China:Beijing	2020
462	GCA_023981975.1	Rectal swab	Spain	2020
463	GCA_023961435.1	Rectal swab	Spain	2021
464	GCA_023978995.1	Unknown	USA: Wyoming	2019
465	GCA_023978045.1	sputum	China: Chengdu, Sichuan	2020
466	GCA_023977945.1	sputum	China: Chengdu, Sichuan	2019
467	GCA_024168805.2	urine	USA	2022
468	GCA_024166405.1	blood	USA	2022
469	GCA_024137095.1	descending colon mucosa	USA: New Hampshire	2021
470	GCA_024138975.1	Unknown	Australia:Victoria	2020
471	GCA_024189995.2	sputum	USA	2022
472	GCA_024178685.1	Rectal swab	Italy: Bologna	2020
473	GCA_024197635.1	Respiratory specimen	India: Vellore	2020
474	GCA_024197955.1	Respiratory specimen	India: Vellore	2020
475	GCA_024198075.1	Respiratory specimen	India: Vellore	2020
476	GCA_024263705.1	urine	USA	2022
477	GCA_024260645.1	sputum	China:Hubei	2020
478	GCA_024290355.1	urine	USA	2022
479	GCA_024292865.2	sputum	USA	2022
480	GCA_024294985.1	descending colon mucosa	USA: New Hampshire	2021
481	GCA_024357645.1	blood	China:Yunnan	2019
482	GCA_024438195.1	human	Guadeloupe	2019
483	GCA_024376855.1	human	Guadeloupe	2019
484	GCA_024433515.1	human	Guadeloupe	2019
485	GCA_024433125.1	human	Guadeloupe	2019
486	GCA_024433065.1	human	Guadeloupe	2019
487	GCA_024432845.1	human	Guadeloupe	2019
488	GCA_024432545.1	human	Guadeloupe	2019
489	GCA_024432175.1	human	Guadeloupe	2019
490	GCA_024377265.1	human	Guadeloupe	2019
491	GCA_024431615.1	human	Guadeloupe	2019
492	GCA_024431505.1	human	Guadeloupe	2019
493	GCA_024376975.1	rectal swab	USA	2022
494	GCA_024446695.1	midstream urine	China:Ruijin Hospital, Shanghai Jiao Tong University School of Medicine	2021
495	GCA_024446655.1	midstream urine	China:Ruijin Hospital, Shanghai Jiao Tong University School of Medicine	2021
496	GCA_024459275.1	throat swab	China:Ruijin Hospital, Shanghai Jiao Tong University School of Medicine	2021
497	GCA_024476565.1	Human blood sample	Ethiopia: Addis Ababa	2019
498	GCA_024476445.1	Human blood sample	Ethiopia: Addis Ababa	2019
499	GCA_024476225.1	Human blood sample	Ethiopia: Addis Ababa	2019
500	GCA_024480185.1	Human blood sample	Ethiopia: Addis Ababa	2019
501	GCA_024472805.1	Human blood sample	Ethiopia: Hawassa	2019
502	GCA_024474865.1	Human blood sample	Ethiopia: Hawassa	2019
503	GCA_024452425.1	Human blood sample	Ethiopia: Hawassa	2019
504	GCA_024473685.1	Human blood sample	Ethiopia: Dessie	2019
505	GCA_024453765.1	Human blood sample	Ethiopia: Dessie	2019
506	GCA_024452405.1	Human blood sample	Ethiopia: Addis Ababa	2019
507	GCA_024473485.1	Human blood sample	Ethiopia: Addis Ababa	2019
508	GCA_024472445.1	Human blood sample	Ethiopia: Dessie	2019
509	GCA_024453855.1	Human blood sample	Ethiopia: Addis Ababa	2019
510	GCA_024434775.1	broncho-alveolar lavage	China:Hubei	2020
511	GCA_024435035.1	sputum	China:Hubei	2021
512	GCA_024491275.1	human	Spain	2019
513	GCA_024491175.1	human	Spain	2019
514	GCA_024488325.1	human	Spain	2019
515	GCA_024527715.1	human	Spain	2019
516	GCA_024488285.1	human	Spain	2019
517	GCA_024493935.1	human	Spain	2019
518	GCA_024493415.1	human	Spain	2019
519	GCA_024493275.1	human	Spain	2019
520	GCA_024492635.1	human	Spain	2019
521	GCA_024490595.1	human	Spain	2019
522	GCA_024492375.1	human	Spain	2019
523	GCA_024527475.1	human	Spain	2019
524	GCA_024484205.2	urine	USA	2022
525	GCA_024534575.2	Urine clean catch	USA	2022
526	GCA_024514245.1	human	Spain	2019
527	GCA_024514995.1	human	Spain	2019
528	GCA_024496205.1	sputum	China:Zhanjiang	2022
529	GCA_024560525.1	Rectal	USA	2022
530	GCA_024559425.1	urine	USA	2021
531	GCA_024735945.2	bronchoalveolar lavage	USA	2022
532	GCA_024582155.1	sputum	China: Zhejiang	2021
533	GCA_024582425.1	stool	China: Zhejiang	2020
534	GCA_024583875.1	Rectal swab	South Africa:Pretoria	2020
535	GCA_024583885.1	Rectal swab	South Africa:Pretoria	2020
536	GCA_024613465.1	stool	Thailand	2019
537	GCA_024610515.1	Fistula	China: Shanghai	2020
538	GCA_024619125.1	feces	USA: Utah	2020
539	GCA_024633355.1	feces	USA: Utah	2019
540	GCA_024608525.1	wildtype obtained from ARisolateBank from CDC	USA:Arkansas	2021
541	GCA_025039255.1	Unknown	Canada	2019
542	GCA_025037225.1	Unknown	Canada	2020
543	GCA_025036685.1	Unknown	Canada	2019
544	GCA_025036605.1	Unknown	Canada	2019
545	GCA_025036025.1	Unknown	Canada	2019
546	GCA_025035985.1	Unknown	Canada	2019
547	GCA_025035585.1	Unknown	Canada	2020
548	GCA_025035205.1	Unknown	Canada	2019
549	GCA_025034475.1	Unknown	Canada	2019
550	GCA_025034415.1	Unknown	Canada	2019
551	GCA_025034095.1	Unknown	Canada	2020
552	GCA_024652925.1	stool	China: Hangzhou	2021
553	GCA_024656125.1	blood	France:Lille	2021
554	GCA_024656165.1	blood	France:Lille	2021
555	GCA_024665705.1	human rectal swab	Spain: Cadiz	2019
556	GCA_024677225.1	urine	Spain: Cadiz	2021
557	GCA_024730825.1	sputum	China: Zhuhai	2022
558	GCA_024731085.1	vaginal secretion	China: Zhuhai	2022
559	GCA_024734155.1	Unknown	China:Shandong	2019
560	GCA_024866505.1	wound	USA	2022
561	GCA_024855545.2	urine	USA	2022
562	GCA_024917075.1	Unknown	China	2022
563	GCA_024917255.1	blood	USA: Houston	2019
564	GCA_024917435.1	blood	USA: Houston	2019
565	GCA_024918055.1	same blood draw as MB8764	USA: Houston	2019
566	GCA_025096525.1	respiratory	Singapore	2019
567	GCA_025116805.1	URINARY	Singapore	2020
568	GCA_025101085.1	RECTAL	Singapore	2020
569	GCA_025103845.1	RECTAL	Singapore	2020
570	GCA_025116665.1	RECTAL	Singapore	2020
571	GCA_025095235.1	wound	Singapore	2019
572	GCA_025116405.1	URINARY	Singapore	2019
573	GCA_025104525.1	URINARY	Singapore	2019
574	GCA_025088065.1	URINARY	Singapore	2020
575	GCA_025100985.1	RECTAL	Singapore	2020
576	GCA_025094055.1	RECTAL	Singapore	2019
577	GCA_025077135.1	GASTROINTESTINAL/ABDOMINAL	Singapore	2020
578	GCA_903936435.1	Unknown	United Kingdom	2019
579	GCA_025118435.1	blood	Italy: Rome	2021
580	GCA_028058215.2	leg	USA	2022
581	GCA_025230715.2	Tissue	USA	2022
582	GCA_025195065.1	Unknown	Thailand: Bangkok	2020
583	GCA_025232435.1	Rectal swab	Switzerland: Basel	2019
584	GCA_025259665.1	Wound/Abscess	USA	2021
585	GCA_025365235.2	urine	USA	2022
586	GCA_025377235.1	blood	India	2019
587	GCA_025377445.1	blood	India	2019
588	GCA_025443555.2	urine	USA	2022
589	GCA_025399535.1	Unknown	Argentina:Buenos Aires	2019
590	GCA_025490515.1	secretion	China: Zhuhai	2021
591	GCA_025642315.1	sputum	China: Zhuhai	2022
592	GCA_025656875.1	stool	India	2020
593	GCA_025656955.1	stool	India	2020
594	GCA_025656985.1	stool	India	2020
595	GCA_025657015.1	stool	India	2020
596	GCA_025657115.1	stool	India	2020
597	GCA_025657135.1	stool	India	2020
598	GCA_025657235.1	stool	India	2020
599	GCA_025657285.1	stool	India	2019
600	GCA_025657315.1	stool	India	2019
601	GCA_025657335.1	stool	India	2019
602	GCA_025686155.2	urine	USA	2022
603	GCA_025689565.2	Unknown	USA	2022
604	GCA_025747415.2	urine	USA	2022
605	GCA_025734435.1	Unknown	China: Shandong	2020
606	GCA_025778195.1	urine	USA	2022
607	GCA_025762455.1	blood	China: Wenzhou	2019
608	GCA_025858615.2	Wound Swab	USA	2022
609	GCA_025877425.1	Rectal sample	Norway	2019
610	GCA_025876825.1	Rectal sample	Norway	2019
611	GCA_025875365.1	Rectal sample	Norway	2021
612	GCA_025874965.1	Rectal sample	Norway	2021
613	GCA_025892915.1	urine	Armenia	2019
614	GCA_025890515.1	Unknown	Germany: Frankfurt am Main	2022
615	GCA_025905445.1	Unknown	China: Wuhan	2021
616	GCA_026068795.1	Rectal Swab	USA	2022
617	GCA_026016005.1	puncture fluid	China: Zhuhai	2022
618	GCA_026109915.2	not collected	USA	2022
619	GCA_026109585.1	not collected	USA	2022
620	GCA_026153495.1	blood	China: Zhejiang	2020
621	GCA_026153555.1	Unknown	China: Hangzhou	2022
622	GCA_026252175.2	sputum	USA	2022
623	GCA_026192125.1	blood	India	2019
624	GCA_026197215.1	patient with infection	China: Beijing	2021
625	GCA_026197985.1	patient with infection	China: Beijing	2020
626	GCA_026198055.1	patient with infection	China: Beijing	2020
627	GCA_026198115.1	patient with infection	China: Beijing	2020
628	GCA_026198285.1	patient with infection	China: Beijing	2020
629	GCA_026198835.1	patient with infection	China: Beijing	2020
630	GCA_026199155.1	patient with infection	China: Beijing	2020
631	GCA_026223285.1	blood	Brazil: Tocantins	2019
632	GCA_026223315.1	urine	Brazil: Tocantins	2019
633	GCA_026223395.1	Knee secretion	Brazil: Campinas	2021
634	GCA_026223775.1	Tracheal secretion	Brazil: Sorocaba	2020
635	GCA_026265195.1	urine	USA	2022
636	GCA_026360215.1	blood	Australia	2020
637	GCA_026354975.1	urine	Australia	2020
638	GCA_026315245.1	urine	Pakistan	2020
639	GCA_026330515.1	unspecified diagnostic sample	Pakistan	2020
640	GCA_026355855.1	blood	Paraguay	2020
641	GCA_026355755.1	urine	Paraguay	2020
642	GCA_026355695.1	urine	Paraguay	2020
643	GCA_026355375.1	urine	Paraguay	2020
644	GCA_026355275.1	urine	Paraguay	2020
645	GCA_026355055.1	urine	Paraguay	2020
646	GCA_026354035.1	urine	Paraguay	2020
647	GCA_026351695.1	urine	Saudi Arabia	2020
648	GCA_026351055.1	blood	Spain	2020
649	GCA_026302835.1	blood	Switzerland	2020
650	GCA_026350055.1	urine	Switzerland	2020
651	GCA_026348755.1	blood	Thailand	2020
652	GCA_026314635.1	blood	Thailand	2020
653	GCA_026348735.1	swab (wound)	Thailand	2020
654	GCA_026314615.1	sputum	Thailand	2020
655	GCA_026348535.1	sputum	Thailand	2020
656	GCA_026348095.1	blood	Turkey	2020
657	GCA_026347135.1	swab (wound)	Zambia	2020
658	GCA_026347075.1	blood	Zambia	2020
659	GCA_026346395.1	sputum	Albania	2020
660	GCA_026336975.1	urine	France	2020
661	GCA_026336815.1	urine	France	2020
662	GCA_026335855.1	urine	Germany	2020
663	GCA_026334775.1	swab (wound)	Ghana	2020
664	GCA_026334755.1	sputum	Ghana	2020
665	GCA_026332095.1	blood	Hong Kong	2020
666	GCA_026332035.1	blood	Hong Kong	2020
667	GCA_026331875.1	blood	Hong Kong	2020
668	GCA_026328725.1	blood	Mozambique	2020
669	GCA_026328635.1	urine	Mozambique	2020
670	GCA_026326495.1	blood	Nigeria	2020
671	GCA_026326415.1	swab (cavity)	Nigeria	2020
672	GCA_026326395.1	urine	Nigeria	2020
673	GCA_026326315.1	swab (superficial and non-surgical)	Nigeria	2020
674	GCA_026326175.1	urine	Nigeria	2020
675	GCA_026326115.1	urine	Nigeria	2020
676	GCA_026326095.1	Unknown	Nigeria	2021
677	GCA_026326075.1	swab (wound)	Nigeria	2021
678	GCA_026324535.1	sputum	Albania	2020
679	GCA_026318405.1	urine	Czech Republic	2020
680	GCA_026075335.2	blood	USA	2022
681	GCA_026043775.2	endotracheal sputum	USA	2022
682	GCA_026413095.1	Pus	Portugal: Aveiro	2019
683	GCA_026585685.1	rectal swab	Switzerland	2019
684	GCA_026585165.1	rectal swab	Switzerland	2019
685	GCA_026586035.1	rectal swab	Switzerland	2019
686	GCA_026624045.1	Liver puncture	China: Hengyang	2020
687	GCA_026624205.1	Liver puncture	China: Hengyang	2019
688	GCA_026624225.1	bile, Blood	China: Hengyang	2019
689	GCA_031039475.1	wound	USA	2022
690	GCA_027262175.2	BAL	USA	2022
691	GCA_027599945.1	Gut	Spain: Madrid	2022
692	GCA_027607375.1	Gut	Spain: Madrid	2022
693	GCA_027596905.1	Gut	Spain: Madrid	2022
694	GCA_027895115.1	blood	Qatar:Doha	2019
695	GCA_027895035.1	blood	Qatar:Doha	2019
696	GCA_027894975.1	blood	Qatar:Doha	2019
697	GCA_027894935.1	blood	Qatar:Doha	2019
698	GCA_027894815.1	blood	Qatar:Doha	2021
699	GCA_028165405.1	Unknown	Bangladesh	2019
700	GCA_027893135.1	Unknown	Bangladesh	2019
701	GCA_027893015.1	Unknown	Bangladesh	2020
702	GCA_027827515.1	Unknown	Bangladesh	2020
703	GCA_027827475.1	Unknown	Bangladesh	2019
704	GCA_027827355.1	Unknown	Bangladesh	2020
705	GCA_027865945.1	Unknown	Bangladesh	2020
706	GCA_027865845.1	Unknown	Bangladesh	2021
707	GCA_027865165.1	Unknown	Bangladesh	2019
708	GCA_027608775.1	Unknown	Bangladesh	2021
709	GCA_027617385.1	Unknown	Bangladesh	2020
710	GCA_027617325.1	Unknown	Bangladesh	2019
711	GCA_027617185.1	Unknown	Bangladesh	2019
712	GCA_027616505.1	Unknown	Bangladesh	2021
713	GCA_027616445.1	Unknown	Bangladesh	2021
714	GCA_027608615.1	Unknown	Bangladesh	2019
715	GCA_027610465.1	Unknown	Bangladesh	2020
716	GCA_027795735.1	stool	China: Zhengzhou	2021
717	GCA_027795595.1	stool	China: Zhengzhou	2021
718	GCA_027994425.2	urine	USA	2022
719	GCA_028059895.1	rectal swab	USA	2022
720	GCA_028085175.2	rectal swab	USA	2022
721	GCA_028192805.2	Unknown	USA	2023
722	GCA_028332985.2	blood	USA	2023
723	GCA_028368915.2	urine	USA	2023
724	GCA_028395905.1	urine	USA	2023
725	GCA_028395575.1	urine	USA	2023
726	GCA_028395615.2	tracheal aspirate	USA	2023
727	GCA_031039415.1	urine	USA	2022
728	GCA_028451185.2	sputum	USA	2022
729	GCA_028506575.2	Rectal Swab	USA	2023
730	GCA_028472745.1	Unknown	China: Chengdu, Sichuan	2019
731	GCA_028526525.1	Unknown	China: Shanxi	2020
732	GCA_028527185.1	Unknown	China: Beijing	2019
733	GCA_028527395.1	Unknown	China: Beijing	2020
734	GCA_028560995.1	human	Spain	2020
735	GCA_028564315.1	human	Spain	2020
736	GCA_028560415.1	human	Spain	2021
737	GCA_028561415.1	blood	China	2021
738	GCA_028574415.2	urine	USA	2023
739	GCA_028572725.2	wound	USA	2023
740	GCA_028595065.1	stool	Switzerland	2022
741	GCA_028671295.2	urine	USA	2023
742	GCA_028656475.1	Unknown	China	2020
743	GCA_028752875.1	Respiratory sample	Italy: Genoa	2021
744	GCA_028863265.1	feces	China:Shandong	2019
745	GCA_028863825.1	feces	China:Shandong	2019
746	GCA_028863835.1	feces	China:Shandong	2019
747	GCA_028872175.1	Tissue	USA	2020
748	GCA_028955805.1	urine	USA	2023
749	GCA_029093505.1	pus	China:Suzhou	2019
750	GCA_029091645.1	urine	USA:Louisiana,New Orleans	2020
751	GCA_029076025.1	blood	Brazil	2021
752	GCA_029109345.1	urine	USA	2019
753	GCA_029194035.1	blood	China	2021
754	GCA_029201505.1	urine	Jamaica	2021
755	GCA_029222045.1	urine	China	2019
756	GCA_029223335.1	bronchoalveolar lavage	Russia: Moscow	2021
757	GCA_029279185.2	urine	USA	2023
758	GCA_029276045.1	urine	USA	2022
759	GCA_029323875.1	cranial bone flap	USA	2023
760	GCA_029323335.2	urine	USA	2023
761	GCA_029277465.1	Pleural effusion	India: Maharashtra, Pune	2019
762	GCA_029374125.2	blood	USA	2023
763	GCA_029400815.1	urine	USA	2021
764	GCA_029433675.1	blood	Morocco	2019
765	GCA_029433715.1	blood	Morocco	2019
766	GCA_029433775.1	blood	Morocco	2019
767	GCA_029482345.2	urine	USA	2023
768	GCA_029458035.1	Wound discharge	Brazil: Sao Paulo	2019
769	GCA_029523135.1	stool	China: Zhejiang	2021
770	GCA_029523205.1	stool	China: Zhejiang	2021
771	GCA_029525935.1	blood	China: JiangSu	2019
772	GCA_029526165.1	bile	China: JiangSu	2019
773	GCA_029526205.1	bile	China: JiangSu	2019
774	GCA_029526235.1	urine	China: JiangSu	2019
775	GCA_029526315.1	bile	China: JiangSu	2019
776	GCA_029526625.1	urine	China: JiangSu	2019
777	GCA_029534755.1	urine	USA	2022
778	GCA_029722415.2	blood	USA	2022
779	GCA_029596545.1	whole blood	USA	2023
780	GCA_029602255.1	urine	USA:Texas	2022
781	GCA_029602315.1	urine	USA:Texas	2021
782	GCA_029621445.1	wound	USA	2020
783	GCA_029624895.1	Midstream specimen of urine	United Kingdom	2022
784	GCA_029664625.1	urine	China: Anhui	2022
785	GCA_029715165.2	Urine specimen	USA	2023
786	GCA_029732075.1	rectal swab	USA	2023
787	GCA_029749155.2	urine	USA	2022
788	GCA_029769825.1	urine	USA	2022
789	GCA_029769725.1	tissue	USA	2022
790	GCA_029826555.2	Rectal swab	USA: VA	2023
791	GCA_029773585.1	Unknown	China: shuangbai	2020
792	GCA_029814845.1	sputum	China: Zhuhai	2022
793	GCA_030904985.1	Rectal swab	USA	2022
794	GCA_029834605.1	Blood of ICU admitted patient	India: Jodhpur	2021
795	GCA_029846155.1	Unknown	Denmark: Copenhagen	2021
796	GCA_029854595.1	Bronchoalveolar lavage fluid	China: Guangzhou	2022
797	GCA_030882885.1	sputum	Japan:Tokyo	2020
798	GCA_030882705.1	sputum	Japan:Tokyo	2020
799	GCA_030882445.1	stool	Japan:Tokyo	2019
800	GCA_030881845.1	urine from indwelling catheter	Japan:Osaka	2019
801	GCA_030880445.1	sputum	Japan:Hokkaido	2020
802	GCA_030879505.1	urine	Japan:Tochigi	2019
803	GCA_030878845.1	urine	Japan:Saitama	2019
804	GCA_030878605.1	venous blood	Japan:Chiba	2019
805	GCA_030878325.1	stool	Japan:Tokyo	2020
806	GCA_030920085.1	venous blood	Japan:Tokyo	2020
807	GCA_030918525.1	urine from catheter	Japan:Osaka	2020
808	GCA_030918265.1	bile	Japan:Osaka	2019
809	GCA_030873665.1	sputum	Japan:Yamaguchi	2019
810	GCA_030873435.1	pus	Japan:Tokushima	2020
811	GCA_030872795.1	stool	Japan:Kagawa	2019
812	GCA_030872015.1	arterial blood	Japan:Kochi	2019
813	GCA_030871575.1	urine from catheter	Japan:Fukuoka	2019
814	GCA_030870985.1	urine	Japan:Fukuoka	2020
815	GCA_030870845.1	urine	Japan:Fukuoka	2020
816	GCA_030870825.1	Unknown	Japan:Fukuoka	2020
817	GCA_030870565.1	urine	Japan:Fukuoka	2020
818	GCA_030870305.1	sputum	Japan:Fukuoka	2019
819	GCA_031070985.1	urine from catheter	Japan:Yamagata	2019
820	GCA_030822895.1	sputum	Japan:Gunma	2020
821	GCA_031070485.1	sputum	Japan:Saitama	2019
822	GCA_031070405.1	urine from catheter	Japan:Chiba	2019
823	GCA_031070025.1	wound	Japan:Tokyo	2019
824	GCA_031069845.1	stool	Japan:Tokyo	2020
825	GCA_031069525.1	sputum	Japan:Tokyo	2020
826	GCA_030822315.1	sputum	Japan:Tokyo	2019
827	GCA_031069205.1	stool	Japan:Tokyo	2019
828	GCA_031069165.1	stool	Japan:Tokyo	2020
829	GCA_031069005.1	urine from indwelling catheter	Japan:Tokyo	2019
830	GCA_030822155.1	sputum	Japan:Kanagawa	2019
831	GCA_031068905.1	sputum	Japan:Kanagawa	2020
832	GCA_031068925.1	urine from catheter	Japan:Kanagawa	2019
833	GCA_031068885.1	urine from catheter	Japan:Kanagawa	2019
834	GCA_031068865.1	skin	Japan:Kanagawa	2020
835	GCA_031068845.1	urine	Japan:Ishikawa	2020
836	GCA_031068405.1	venous blood	Japan:Aichi	2020
837	GCA_030821155.1	sputum	Japan:Aichi	2019
838	GCA_031067905.1	sputum	Japan:Kyoto	2020
839	GCA_031067145.1	others	Japan:Hyogo	2019
840	GCA_031067085.1	stool	Japan:Hyogo	2019
841	GCA_031066985.1	sputum	Japan:Hyogo	2020
842	GCA_031066905.1	urine from indwelling catheter	Japan:Hyogo	2019
843	GCA_031066445.1	urine from indwelling catheter	Japan:Nara	2020
844	GCA_031066345.1	urine	Japan:Tottori	2019
845	GCA_031066005.1	sputum	Japan:Okayama	2019
846	GCA_031065905.1	sputum	Japan:Hiroshima	2019
847	GCA_031065465.1	urine from catheter	Japan:Fukuoka	2019
848	GCA_031065005.1	stool	Japan:Okinawa	2019
849	GCA_031064855.1	sputum	Japan:Okinawa	2019
850	GCA_031064755.1	bile	Japan:Okinawa	2019
851	GCA_031064645.1	skin	Japan:Hokkaido	2019
852	GCA_031064575.1	skin	Japan:Hokkaido	2019
853	GCA_031055055.1	nasal cavity	Japan:Tochigi	2019
854	GCA_031055095.1	urine	Japan:Tochigi	2019
855	GCA_031054835.1	urine	Japan:Tochigi	2019
856	GCA_031054315.1	urine from catheter	Japan:Saitama	2019
857	GCA_031054275.1	urine from catheter	Japan:Saitama	2019
858	GCA_031054155.1	urine	Japan:Saitama	2019
859	GCA_031054035.1	venous blood	Japan:Chiba	2019
860	GCA_031053955.1	bile	Japan:Chiba	2019
861	GCA_031053715.1	urine from indwelling catheter	Japan:Tokyo	2020
862	GCA_031053675.1	sputum	Japan:Tokyo	2020
863	GCA_029963745.1	urine	Japan:Tokyo	2020
864	GCA_031053195.1	stool	Japan:Tokyo	2020
865	GCA_031053135.1	stool	Japan:Tokyo	2019
866	GCA_029963525.1	urine	Japan:Tokyo	2020
867	GCA_031052895.1	urine	Japan:Tokyo	2019
868	GCA_031052815.1	urine	Japan:Tokyo	2019
869	GCA_031052755.1	stool	Japan:Tokyo	2020
870	GCA_029878705.1	urine	Japan:Kyoto	2019
871	GCA_029877505.1	central venous catheter	Japan:Kyoto	2020
872	GCA_029876925.1	drained fluid	Japan:Osaka	2020
873	GCA_030807495.1	sputum	Japan:Hyogo	2019
874	GCA_030807425.1	sputum	Japan:Hyogo	2019
875	GCA_030806905.1	urine	Japan:Hyogo	2020
876	GCA_030806265.1	bile	Japan:Wakayama	2019
877	GCA_030806065.1	venous blood	Japan:Wakayama	2019
878	GCA_030805945.1	sputum	Japan:Wakayama	2019
879	GCA_030804955.1	venous blood	Japan:Shimane	2019
880	GCA_030804715.1	others	Japan:Okayama	2020
881	GCA_030804305.1	others	Japan:Okayama	2019
882	GCA_030802325.1	urine	Japan:Hiroshima	2019
883	GCA_030802205.1	urine	Japan:Hiroshima	2019
884	GCA_030801265.1	venous blood	Japan:Aomori	2019
885	GCA_030799585.1	arterial blood	Japan:Tokyo	2019
886	GCA_030799075.1	sputum	Japan:Tokyo	2019
887	GCA_030797895.1	sputum	Japan:Shizuoka	2019
888	GCA_030796545.1	sputum	Japan:Osaka	2019
889	GCA_030796125.1	urine	Japan:Hyogo	2019
890	GCA_030795005.1	urine from catheter	Japan:Hiroshima	2019
891	GCA_030794965.1	urine from catheter	Japan:Hiroshima	2019
892	GCA_030793285.1	sputum	Japan:Tokushima	2020
893	GCA_030792265.1	urine	Japan:Ehime	2020
894	GCA_030792205.1	bile	Japan:Ehime	2020
895	GCA_030791505.1	bile	Japan:Ehime	2020
896	GCA_030790045.1	urine	Japan:Fukuoka	2019
897	GCA_030789745.1	Unknown	Japan:Fukuoka	2019
898	GCA_030788135.1	pharyngeal mucus	Japan:Fukuoka	2019
899	GCA_030787985.1	abcess	Japan:Fukuoka	2019
900	GCA_030786745.1	stool	Japan:Fukuoka	2019
901	GCA_030786305.1	central venous catheter	Japan:Fukuoka	2019
902	GCA_030785935.1	urine	Japan:Fukuoka	2020
903	GCA_030785805.1	sputum	Japan:Fukuoka	2019
904	GCA_030784585.1	venous blood	Japan:Fukuoka	2020
905	GCA_030784315.1	sputum	Japan:Fukuoka	2019
906	GCA_030783585.1	sputum	Japan:Saga	2019
907	GCA_030783185.1	urine	Japan:Saga	2019
908	GCA_030780225.1	stool	Japan:Okinawa	2020
909	GCA_030779885.1	stool	Japan:Okinawa	2019
910	GCA_030776515.1	venous blood	Japan:Okinawa	2019
911	GCA_031038635.1	urine	USA	2021
912	GCA_031038575.1	urine	USA	2021
913	GCA_031044355.1	wound	USA	2021
914	GCA_031037975.1	urine	USA	2019
915	GCA_031037935.1	urine	USA	2019
916	GCA_031037855.1	blood	USA	2019
917	GCA_031037835.1	blood	USA	2019
918	GCA_031037755.1	urine	USA	2019
919	GCA_031048395.1	urine	USA	2019
920	GCA_031037735.1	blood	USA	2019
921	GCA_031037675.1	urine	USA	2019
922	GCA_031037635.1	urine	USA	2019
923	GCA_031037655.1	urine	USA	2019
924	GCA_031047215.1	Rectal swab	USA	2023
925	GCA_031047755.1	aspirate	Egypt:Alexandria	2020
926	GCA_029955815.1	blood	Ecuador: Quito	2022
927	GCA_029955895.1	blood	Ecuador: Quito	2022
928	GCA_029955985.1	blood	Ecuador: Quito	2022
929	GCA_030024485.1	Unknown	Nigeria	2021
930	GCA_030024585.1	Unknown	Nigeria	2021
931	GCA_030025025.1	Unknown	Nigeria	2021
932	GCA_031060575.1	urine	USA	2023
933	GCA_031046835.1	Rectal	USA:Boston	2021
934	GCA_031046775.1	tracheal aspirate	USA:Boston	2022
935	GCA_031046555.1	Bronchial alveolar lavage	USA:Boston	2022
936	GCA_031046495.1	urine	USA:Boston	2022
937	GCA_031046435.1	urine	USA:Boston	2022
938	GCA_031046355.1	urine	USA:Boston	2022
939	GCA_031046235.1	Scrotum	USA:Boston	2022
940	GCA_031046115.1	wound	USA:Boston	2022
941	GCA_031045815.1	urine	USA:Boston	2022
942	GCA_031045515.1	urine	USA:Boston	2023
943	GCA_031044975.1	urine	USA:Boston	2022
944	GCA_031044995.1	blood	USA:Boston	2022
945	GCA_031044835.1	urine	USA:Boston	2023
946	GCA_031044935.1	urine	USA:Boston	2023
947	GCA_031044735.1	tracheal aspirate	USA:Boston	2023
948	GCA_031044655.1	urine	USA:Boston	2022
949	GCA_031044435.1	urine	USA:Boston	2022
950	GCA_030052935.1	Clinical Microbiology Laboratory	China:Guangdong	2021
951	GCA_030052945.1	Clinical Microbiology Laboratory	China:Guangdong	2021
952	GCA_030061645.1	Isolated from catheter blood of an 15 years old female	Chile: Metropolitan Region	2019
953	GCA_030061685.1	Isolated from blood of a 29 years old male	Chile: Metropolitan Region	2019
954	GCA_030061715.1	Isolated from peritoneal fluid of a 79 years old male	Chile: Metropolitan Region	2019
955	GCA_030061755.1	Isolated from blood of a 79 years old male	Chile: De Los Lagos Region	2019
956	GCA_031042955.1	Catheter	USA	2023
957	GCA_030067195.1	sputum	China: Anhui	2022
958	GCA_031042295.1	urine	USA	2023
959	GCA_031042155.1	Unknown	USA	2023
960	GCA_031042135.1	wound	USA	2023
961	GCA_947574645.1	rectal	Germany	2022
962	GCA_947576675.1	rectal	Germany	2022
963	GCA_947575615.1	rectal	Germany	2022
964	GCA_031039675.1	Urine specimen obtained by clean catch procedure	USA	2023
965	GCA_031039635.1	urine	USA	2023
966	GCA_031039595.1	urine	USA	2023
967	GCA_030177015.1	anorectal swab	Germany:Muenster	2022
968	GCA_030185455.1	blood	Australia: Melbourne	2019
969	GCA_030213745.1	Unknown	USA: Maywood, IL	2019
970	GCA_030214025.1	Unknown	USA: Maywood, IL	2019
971	GCA_030214185.1	Unknown	USA: Maywood, IL	2019
972	GCA_030214975.1	Unknown	USA: Maywood, IL	2019
973	GCA_030216145.1	Unknown	USA: Maywood, IL	2019
974	GCA_030239185.1	Blood culture	Nigeria	2020
975	GCA_031033845.1	other	USA	2023
976	GCA_030250445.1	blood	Pakistan	2019
977	GCA_030250465.1	blood	Pakistan	2019
978	GCA_030262515.1	stool	China: Hangzhou	2020
979	GCA_031018585.1	urine	USA	2023
980	GCA_030272075.1	blood	USA	2021
981	GCA_030283125.1	Rectal swab	Australia:Melbourne	2021
982	GCA_030283585.1	urine	Australia:Melbourne	2020
983	GCA_030283745.1	wound	Australia:Melbourne	2020
984	GCA_030284045.1	Rectal swab	Australia:Melbourne	2019
985	GCA_031018345.1	Unknown	USA	2023
986	GCA_031018305.1	Unknown	USA	2023
987	GCA_031018205.1	Unknown	USA	2023
988	GCA_031017665.1	Rectal swab	USA	2023
989	GCA_030376925.1	urine	Gaza Strip	2021
990	GCA_030376945.1	urine	Gaza Strip	2021
991	GCA_030376985.1	ear	Gaza Strip	2021
992	GCA_030385215.1	sputum	USA:Pittsburgh	2021
993	GCA_030385335.1	sputum	USA:Pittsburgh	2021
994	GCA_030385415.1	sputum	USA:Pittsburgh	2021
995	GCA_030385425.1	sputum	USA:Pittsburgh	2020
996	GCA_031017085.1	blood	USA	2023
997	GCA_030406885.1	Rectal swab	Uganda: Kampala	2022
998	GCA_031016625.1	Unknown	USA	2021
999	GCA_031016505.1	Unknown	USA	2021
1000	GCA_030410325.1	urine	USA	2023
1001	GCA_031015045.1	Blood specimen	USA	2023
1002	GCA_030480605.1	Unknown	Uganda: Kampala	2022
1003	GCA_030499915.1	blood	India	2021
1004	GCA_030500045.1	blood	India	2021
1005	GCA_030500195.1	blood	India	2021
1006	GCA_030503755.1	sputum	China	2019
1007	GCA_031014785.1	rectal swab	USA	2023
1008	GCA_031014645.1	urine	USA	2023
1009	GCA_031014585.1	wound	USA	2023
1010	GCA_030517965.1	Unknown	South Korea	2020
1011	GCA_030519575.1	blood	Russia:Moscow	2023
1012	GCA_033202625.1	Unknown	USA	2023
1013	GCA_031014425.1	clinical	USA: Florida	2023
1014	GCA_033201355.1	Homo Sapiens clinical	USA: Florida	2023
1015	GCA_031014045.1	Homo Sapiens clinical	USA: Florida	2023
1016	GCA_030544725.1	Unknown	China: Zhejiang	2021
1017	GCA_031013865.1	urine	USA:Boston	2023
1018	GCA_030549405.1	blood	India	2020
1019	GCA_031013285.1	urine	USA	2023
1020	GCA_031010365.1	BAL	Germany:Bavaria	2021
1021	GCA_030674965.1	Unknown	USA	2022
1022	GCA_030675355.1	Unknown	USA	2021
1023	GCA_031009805.1	Unknown	USA	2023
1024	GCA_030715495.1	Unknown	Oman	2021
1025	GCA_030715535.1	Unknown	Oman	2021
1026	GCA_030715625.1	Unknown	Oman	2020
1027	GCA_030715745.1	Unknown	Oman	2019
1028	GCA_031009225.1	urine	USA	2023
1029	GCA_030756775.1	Unknown	Russia: Nizhny Novgorod	2023
1030	GCA_030847575.1	feces	China: Beijing	2019
1031	GCA_030863985.1	blood	China: Hangzhou	2023
1032	GCA_959611145.1	clinical material	South Africa	2020
1033	GCA_959610545.1	clinical material	South Africa	2019
1034	GCA_959611525.1	clinical material	South Africa	2019
1035	GCA_959612825.1	clinical material	South Africa	2019
1036	GCA_959612155.1	clinical material	South Africa	2019
1037	GCA_959612285.1	clinical material	South Africa	2019
1038	GCA_959612775.1	clinical material	South Africa	2019
1039	GCA_959611305.1	clinical material	South Africa	2020
1040	GCA_030910415.1	rectal swab	Poland: Wroclaw	2019
1041	GCA_030911205.1	wound	Poland: Elblag	2019
1042	GCA_030912885.1	skin	Poland: Tczew	2019
1043	GCA_030913045.1	wound	Poland: Lodz	2019
1044	GCA_030958715.1	urine	USA	2023
1045	GCA_030928455.1	Blood culture	USA: Philadelphia, PA	2021
1046	GCA_030972765.1	Unknown	China: Zhejiang	2020
1047	GCA_030972845.1	Unknown	China: Zhejiang	2020
1048	GCA_031032905.1	urine	USA	2023
1049	GCA_031164775.1	clinical	USA: Wyoming	2021
1050	GCA_031179855.1	Unknown	Greece	2022
1051	GCA_031244225.1	urine	USA	2023
1052	GCA_031241135.1	urine	USA	2023
1053	GCA_031241095.1	Unknown	USA	2023
1054	GCA_031214565.1	blood	USA	2023
1055	GCA_031212825.1	urine	USA	2023
1056	GCA_031211825.1	Tissue (Specify:)	USA	2023
1057	GCA_031211865.1	Induced Sputum	USA	2023
1058	GCA_031209465.1	Wound Swab	USA	2023
1059	GCA_031208145.1	sputum	USA	2023
1060	GCA_031207605.1	Body Fluid (Specify:)	USA	2023
1061	GCA_031309225.1	sputum	USA	2023
1062	GCA_031334255.1	rectal swab	USA	2023
1063	GCA_031326265.1	rectal swab	United Kingdom: England	2022
1064	GCA_031527525.1	other	Singapore	2021
1065	GCA_031527465.1	bone	Singapore	2021
1066	GCA_031582575.1	urine	USA	2019
1067	GCA_031641015.1	urine	USA	2023
1068	GCA_031624155.1	sputum	China: Zhejiang	2020
1069	GCA_031624735.1	sputum	India	2020
1070	GCA_031892405.1	sputum	USA	2023
1071	GCA_031846045.1	urine	USA	2023
1072	GCA_031847195.1	Unknown	China:Ningbo	2020
1073	GCA_032121395.1	urine	USA:Boston	2023
1074	GCA_032120255.1	urine	USA:Boston	2023
1075	GCA_032120235.1	urine	USA:Boston	2023
1076	GCA_032133575.1	Pharyngeal mucus	Japan:Sapporo	2020
1077	GCA_032130695.1	Pharyngeal mucus	Japan:Sapporo	2020
1078	GCA_032130715.1	Pharyngeal mucus	Japan:Sapporo	2020
1079	GCA_031333115.2	rectal swab	USA	2023
1080	GCA_032150065.1	Unknown	USA	2023
1081	GCA_032149765.1	Unknown	USA	2023
1082	GCA_032236435.1	clinical	USA: Wyoming	2023
1083	GCA_032263705.1	urine	USA	2023
1084	GCA_032263625.1	urine	USA	2023
1085	GCA_032297005.1	blood	USA: Boston	2022
1086	GCA_032296985.1	blood	USA: Boston	2022
1087	GCA_032296965.1	blood	USA: Boston	2022
1088	GCA_032288505.1	blood	USA: Boston	2022
1089	GCA_032288345.1	blood	USA: Boston	2021
1090	GCA_032289245.1	blood	USA: Boston	2021
1091	GCA_032289305.1	blood	USA: Boston	2021
1092	GCA_032288385.1	blood	USA: Boston	2021
1093	GCA_032287005.1	blood	USA: Boston	2021
1094	GCA_032288285.1	blood	USA: Boston	2021
1095	GCA_032286565.1	blood	USA: Boston	2021
1096	GCA_032286545.1	blood	USA: Boston	2021
1097	GCA_032289145.1	blood	USA: Boston	2021
1098	GCA_032286485.1	blood	USA: Boston	2021
1099	GCA_032287725.1	blood	USA: Boston	2021
1100	GCA_032286405.1	blood	USA: Boston	2021
1101	GCA_032286365.1	blood	USA: Boston	2021
1102	GCA_032296705.1	blood	USA: Boston	2022
1103	GCA_032296665.1	blood	USA: Boston	2022
1104	GCA_032289065.1	blood	USA: Boston	2022
1105	GCA_032296605.1	blood	USA: Boston	2022
1106	GCA_032296565.1	blood	USA: Boston	2022
1107	GCA_032290125.1	blood	USA: Boston	2022
1108	GCA_032296525.1	blood	USA: Boston	2022
1109	GCA_032343715.1	Unknown	Canada: Ottawa	2020
1110	GCA_032348595.1	Unknown	Canada: Ottawa	2021
1111	GCA_032440745.1	bone	USA	2023
1112	GCA_032460705.1	sputum	China: Shaoxing	2019
1113	GCA_032462045.1	Rectal swab	Portugal	2022
1114	GCA_032462185.1	urine	Portugal	2022
1115	GCA_032636685.1	stool	Peru: Lima	2019
1116	GCA_032636505.1	stool	Peru: Lima	2019
1117	GCA_032636465.1	blood	Peru: Lima	2019
1118	GCA_032636425.1	urine	Peru: Lima	2019
1119	GCA_032602465.1	Rectal	USA	2023
1120	GCA_032721675.1	Other Source	USA	2023
1121	GCA_032720215.1	not collected	Italy: Milan	2019
1122	GCA_032596235.1	rectal swab	Russia: Moscow	2019
1123	GCA_032597055.1	endotracheal aspirate	Russia: Moscow	2019
1124	GCA_032597095.1	rectal swab	Russia: Moscow	2019
1125	GCA_032704125.1	urine	USA	2023
1126	GCA_032669825.1	Unknown	South Korea: Seoul	2021
1127	GCA_032676235.1	Unknown	Lebanon: Byblos	2023
1128	GCA_032676435.1	Unknown	Lebanon: Byblos	2023
1129	GCA_032809205.1	Unknown	USA	2023
1130	GCA_032804245.1	Unknown	USA	2023
1131	GCA_032849345.1	urine	USA	2023
1132	GCA_032848805.1	urine	USA	2023
1133	GCA_032847895.1	urine	USA	2023
1134	GCA_032993965.1	stool/rectal swab	Canada: Ottawa	2021
1135	GCA_032992045.1	stool/rectal swab	Canada: Ottawa	2021
1136	GCA_032991655.1	stool/rectal swab	Canada: Ottawa	2021
1137	GCA_032990535.1	stool/rectal swab	Canada: Ottawa	2021
1138	GCA_032988405.1	stool/rectal swab	Canada: Ottawa	2021
1139	GCA_033028465.1	Unknown	USA	2021
1140	GCA_033093405.1	patient	Uganda	2020
1141	GCA_033093385.1	patient	Tanzania	2020
1142	GCA_033093345.1	patient	Uganda	2020
1143	GCA_033093365.1	patient	Tanzania	2020
1144	GCA_033093305.1	patient	Uganda	2020
1145	GCA_033116295.1	sputum	China:Shannxi	2019
1146	GCA_033106025.1	blood	USA: Houston	2020
1147	GCA_033105705.1	blood	USA: Houston	2022
1148	GCA_033105645.1	blood	USA: Houston	2022
1149	GCA_033105505.1	blood	USA: Houston	2021
1150	GCA_033105345.1	blood	USA: Houston	2021
1151	GCA_033104725.1	blood	USA: Houston	2019
1152	GCA_033104625.1	blood	USA: Houston	2020
1153	GCA_033104525.1	blood	USA: Houston	2019
1154	GCA_033104385.1	blood	USA: Houston	2019
1155	GCA_033104205.1	blood	USA: Houston	2019
1156	GCA_033137985.1	Blood specimen	USA	2023
1157	GCA_033195235.1	Unknown	USA	2023
1158	GCA_033335975.1	urine	Uganda:Kiruddu National Referral Hospital	2022
1159	GCA_033336035.1	urine	Uganda:Kiruddu National Referral Hospital	2022
1160	GCA_033336115.1	urine	Uganda:Kiruddu National Referral Hospital	2021
1161	GCA_033336135.1	Endocervical Swab	Uganda:Kiruddu National Referral Hospital	2021
1162	GCA_033336195.1	urine	Uganda:Kiruddu National Referral Hospital	2021
1163	GCA_033336215.1	Pus swab	Uganda:Kiruddu National Referral Hospital	2021
1164	GCA_033336295.1	Pus swab	Uganda:Kiruddu National Referral Hospital	2021
1165	GCA_033336385.1	Pus swab	Uganda:General Military Hospital Bombo	2022
1166	GCA_033336415.1	Pus swab	Uganda:General Military Hospital Bombo	2021
1167	GCA_033336455.1	urine	Uganda:Gulu Regional Referrel Hospital	2021
1168	GCA_033336515.1	urine	Uganda:Gulu Regional Referrel Hospital	2021
1169	GCA_033342035.1	stool	China:Hangzhou	2023
1170	GCA_029749115.3	urine	USA	2022
1171	GCA_029741845.3	urine	USA	2023
1172	GCA_033540615.1	Unknown	South Africa: Cape Town	2022
1173	GCA_033540735.1	Unknown	South Africa: Cape Town	2022
1174	GCA_033540935.1	Unknown	South Africa: Cape Town	2022
1175	GCA_033541115.1	Unknown	South Africa: Cape Town	2022
1176	GCA_033541255.1	Unknown	South Africa: Cape Town	2022
1177	GCA_033541555.1	Unknown	South Africa: Cape Town	2022
1178	GCA_033541585.1	Unknown	South Africa: Cape Town	2022
1179	GCA_033541735.1	Unknown	South Africa: Cape Town	2022
1180	GCA_033541815.1	Unknown	South Africa: Cape Town	2021
1181	GCA_033542365.1	Unknown	South Africa: Cape Town	2021
1182	GCA_033542515.1	Unknown	South Africa: Cape Town	2021
1183	GCA_033587695.1	not collected	Netherlands	2022
1184	GCA_033549685.1	Unknown	Russia	2021
1185	GCA_033549725.1	Unknown	Russia	2021
1186	GCA_033549745.1	Unknown	Russia	2021
1187	GCA_033549805.1	Unknown	Russia	2021
1188	GCA_033563215.1	urine	China:Shandong	2021
1189	GCA_033564015.1	urine	China:Shandong	2021
1190	GCA_033726295.1	abdomen	USA	2023
1191	GCA_033726275.1	Intraperitoneal Fluid	USA	2023
1192	GCA_033725815.1	urine	USA	2023
1193	GCA_033821795.1	urine	USA	2023
1194	GCA_033822145.1	Homo Sapiens clinical	USA: Florida	2023
1195	GCA_033802585.1	feces	Singapore	2019
1196	GCA_033802845.1	blood	China: Shanghai	2022
1197	GCA_033807455.1	sputum	China:Wuhan	2020
1198	GCA_033847565.1	patient	China:Zhejiang	2021
1199	GCA_033852495.1	patient	China:Zhejiang	2021
1200	GCA_033857255.1	patient	China:Zhejiang	2021
1201	GCA_033859755.1	patient	China:Zhejiang	2021
1202	GCA_033863175.1	patient	China:Zhejiang	2021
1203	GCA_033869935.1	patient	China:Zhejiang	2021
1204	GCA_033904125.1	Unknown	USA	2023
1205	GCA_033949455.1	urine	China: Pingguo	2021
1206	GCA_034048995.1	urine	USA	2023
1207	GCA_034060625.1	Lavage, Bronchial	USA	2023
1208	GCA_034164255.1	urine	USA: Pittsburgh, Pennsylvania	2023
1209	GCA_034163965.1	sputum	USA: Pittsburgh, Pennsylvania	2023
1210	GCA_034163425.1	Rectal Swab	USA: Pittsburgh, Pennsylvania	2022
1211	GCA_034163265.1	blood	USA: Pittsburgh, Pennsylvania	2022
1212	GCA_034163285.1	Rectal Swab	USA: Pittsburgh, Pennsylvania	2022
1213	GCA_034163245.1	blood	USA: Pittsburgh, Pennsylvania	2022
1214	GCA_034153325.1	wound	USA: Pittsburgh, Pennsylvania	2022
1215	GCA_034155585.1	Rectal Swab	USA: Pittsburgh, Pennsylvania	2022
1216	GCA_034159525.1	urine	USA: Pittsburgh, Pennsylvania	2023
1217	GCA_034158885.1	sputum	USA: Pittsburgh, Pennsylvania	2022
1218	GCA_034137825.1	Rectal Swab	USA: Pittsburgh, Pennsylvania	2023
1219	GCA_034166525.1	wound	USA: Pittsburgh, Pennsylvania	2023
1220	GCA_034195045.1	wound	USA: Pittsburgh, Pennsylvania	2022
1221	GCA_034156825.1	blood	USA: Pittsburgh, Pennsylvania	2022
1222	GCA_034156065.1	blood	USA: Pittsburgh, Pennsylvania	2021
1223	GCA_034120625.1	Abscess	USA	2023
1224	GCA_034220555.1	Unknown	USA	2023
1225	GCA_034224295.1	hvs	Ghana: sekondi-takoradi	2021
1226	GCA_034223875.1	urine	Ghana: cape_coast	2021
1227	GCA_034230075.1	urine	Ghana: cape_coast	2021
1228	GCA_034223995.1	blood	Ghana: cape_coast	2021
1229	GCA_034223715.1	urine	Ghana: cape_coast	2021
1230	GCA_034222855.1	urine	USA	2023
1231	GCA_034262675.1	urine	USA	2023
1232	GCA_963694945.1	human abdominal fluid	Bulgaria	2023
1233	S1_R12	Urine	India	2020
1234	S10_R10	Others	India	2020
1235	S10_R11	Others	India	2020
1236	S11_R10	Others	India	2020
1237	S14_R8	Others	India	2020
1238	S16_R12	Respiratory	India	2020
1239	S16_R18_R1	Neonate_blood	India	2016
1240	S17_R18_R1	Neonate_blood	India	2016
1241	S18_R18_R1	Neonate_blood	India	2016
1242	S2_R12	Urine	India	2020
1243	S21_R18_R1	Neonate_blood	India	2016
1244	S22_R10	Urine	India	2020
1245	S22_R18_R1	Neonate_blood	India	2016
1246	S23_R10	Urine	India	2020
1247	S23_R18_R1	Neonate_blood	India	2016
1248	S24_R18_R1	Neonate_blood	India	2016
1249	S25_R18_R1	Neonate_blood	India	2016
1250	S26_R10	Others	India	2019
1251	S26_R8	Urine	India	2020
1252	S27_R12	Others	India	2019
1253	S27_R18_R1	Unknown	India	2020
1254	S27_R8	Neonate_blood	India	2016
1255	S28_R18_R1	Neonate_blood	India	2016
1256	S29_R12	Unknown	India	2020
1257	S29_R18_R1	Neonate_blood	India	2016
1258	S3_R11	Others	India	2019
1259	S3_R8	Respiratory	India	2020
1260	S30_R12	Unknown	India	2020
1261	S30_R18_R1	Neonate_blood	India	2016
1262	S31_R12	Blood	India	2020
1263	S31_R8	Unknown	India	Unknown
1264	S33_R12	Respiratory	India	2019
1265	S33_R7	Unknown	India	Unknown
1266	S34_R12	Urine	India	2019
1267	S34_R7	Unknown	India	Unknown
1268	S37_R12	Urine	India	2020
1269	S37_R7	Urine	India	2020
1270	S37_R8	Unknown	India	Unknown
1271	S38_R12	Others	India	2020
1272	S38_R8	Unknown	India	Unknown
1273	S39_R8	Urine	India	2020
1274	S4_R11	Others	India	2020
1275	S41_R8	Respiratory	India	2020
1276	S43_R8	Respiratory	India	2020
1277	S44_R8	Urine	India	2020
1278	S6_R11	Urine	India	2020
1279	S64_S7R9	Urine	India	2020
1280	S68_S8R9	Blood	India	2020
1281	S9_R8	Urine	India	2020

## Sheet:  S7d
Table S7d: Metadata of clinical A. baumannii isolates from NCBI database
S. No.	Assembly	Sample source	Location	Year of collection
1	GCA_004790725.1	sputum	Sudan: Khartoum	2019
2	GCA_005280435.1	blood	India	2019
3	GCA_005280675.1	sputum	India	2019
4	GCA_007113795.1	Patient sputum	China: Shenzhen	2018
5	GCA_009857695.1	Unknown	Viet Nam	2018
6	GCA_010178915.1	blood	India: Vellore	2019
7	GCA_010178955.1	blood	India: Vellore	2019
8	GCA_010179335.1	blood	India: Vellore	2019
9	GCA_010499755.1	Endotracheal Aspirate	India: Vellore	2019
10	GCA_010499785.1	blood	India: Vellore	2019
11	GCA_010499945.1	Endotracheal Aspirate	India: Vellore	2019
12	GCA_010500345.1	Endotracheal Aspirate	India: Vellore	2019
13	GCA_010500385.1	Endotracheal Aspirate	India: Vellore	2019
14	GCA_010500415.1	Endotracheal Aspirate	India: Vellore	2019
15	GCA_010500545.1	Endotracheal Aspirate	India: Vellore	2019
16	GCA_011601365.1	blood	India: Vellore	2019
17	GCA_011603765.1	Endotracheal Aspirate	India: Vellore	2019
18	GCA_012272715.1	Bronchoalveolar lavage fluid	China: Beijing	2019
19	GCA_012934905.1	blood	India	2019
20	GCA_012934925.1	sputum	India	2019
21	GCA_012935005.1	sputum	India	2019
22	GCA_012935105.1	BAL	India	2019
23	GCA_012935125.1	BAL	India	2019
24	GCA_012935145.1	blood	India	2019
25	GCA_013344855.1	Unknown	USA	2019
26	GCA_013346525.1	Unknown	USA	2019
27	GCA_013778425.1	bile	Thailand: Roi et	2018
28	GCA_014322245.1	rectal swab	China:Hangzhou	2019
29	GCA_015265765.1	blood	South Africa:KwaZulu-Natal	2018
30	GCA_015265775.1	blood	South Africa:KwaZulu-Natal	2018
31	GCA_015265785.1	blood	South Africa:KwaZulu-Natal	2018
32	GCA_015666365.1	blood	Brazil	2020
33	GCA_015666475.1	blood	Brazil	2020
34	GCA_015732435.1	bronchial	China:Beijing	2018
35	GCA_016054925.1	blood	Brazil	2020
36	GCA_016055595.1	blood	Brazil	2019
37	GCA_016055685.1	blood	Brazil	2019
38	GCA_016055715.1	blood	Brazil	2019
39	GCA_016055835.1	Catheter Tip	Brazil	2019
40	GCA_016055945.1	blood	Brazil	2019
41	GCA_016056095.1	blood	Brazil	2019
42	GCA_016056145.1	blood	Brazil	2019
43	GCA_016125715.1	patient in hospital	Tanzania: Dar es Salaam	2019
44	GCA_016350105.1	blood	South Korea: Hwaseong-si	2020
45	GCA_016416045.1	blood	Brazil	2020
46	GCA_016471115.2	Unknown	USA	2020
47	GCA_016473315.1	wound	Libya:Tripoli	2020
48	GCA_016473675.2	sputum isolate	USA	2019
49	GCA_016475185.2	Unknown	USA	2020
50	GCA_016475525.2	Unknown	USA	2020
51	GCA_016475765.2	Unknown	USA	2020
52	GCA_016478985.2	urine	USA	2020
53	GCA_016480415.2	sputum	USA	2020
54	GCA_016480565.2	Tracheal Aspirate/Wash	USA	2020
55	GCA_016482925.2	urine	USA	2020
56	GCA_016489265.2	blood	USA	2019
57	GCA_016489925.2	Wound/Abscess	USA	2019
58	GCA_016490465.2	Urine catheter	USA	2019
59	GCA_016506005.1	blood	USA: Pittsburgh, Pennsylvania	2019
60	GCA_016506045.1	sputum	USA: Pittsburgh, Pennsylvania	2019
61	GCA_016635075.1	Surgical wound	Benin	2019
62	GCA_016654165.1	urine	Russia: Moscow	2019
63	GCA_016654255.2	BAL (bronchoalveolar lavage)	Russia: Moscow	2019
64	GCA_016654265.1	BAL (bronchoalveolar lavage)	Russia: Moscow	2019
65	GCA_016654295.1	urine	Russia: Moscow	2019
66	GCA_016654335.1	Abdominal abscess	Russia: Moscow	2019
67	GCA_016762855.1	Rectal swab	France: Le Kremlin Bicetre	2019
68	GCA_016973895.2	Wound/Abscess	USA	2021
69	GCA_017098225.2	abdominal fluid	China: Wuhan, Hubei	2018
70	GCA_017142385.2	Blood specimen	USA	2020
71	GCA_017143195.2	Sputum specimen	USA	2020
72	GCA_017143335.2	other	USA	2020
73	GCA_017168535.1	Unknown	Kenya:Kisumu	2019
74	GCA_017168645.1	Unknown	Kenya:Kisumu	2018
75	GCA_017168905.1	Unknown	Kenya:Kisii	2018
76	GCA_017724155.1	Respiratory specimen	India: New Delhi	2020
77	GCA_017726575.1	Respiratory specimen	India: New Delhi	2020
78	GCA_017897405.1	Unknown	Lebanon	2020
79	GCA_017897645.1	Unknown	Lebanon	2020
80	GCA_018068145.1	lung	USA	2020
81	GCA_018135585.1	patient	China:Hangzhou	2019
82	GCA_018156065.1	Pulmonary secretion	Chile: Temuco	2019
83	GCA_018221365.1	blood	Israel:Tel-Aviv	2019
84	GCA_018221375.1	blood	Israel:Tel-Aviv	2019
85	GCA_018288475.2	Tissue specimen	USA	2021
86	GCA_018422645.1	Rectal swab/stool	Germany	2019
87	GCA_018423275.1	Rectal swab/stool	Germany	2019
88	GCA_018446635.1	Rectal swab/stool	Germany	2019
89	GCA_018447265.1	Wound swab	Germany	2019
90	GCA_018678125.1	bile	Russia: Moscow	2018
91	GCA_019076685.1	Faecal	Malaysia	2018
92	GCA_019188885.1	blood	Egypt: Cairo	2020
93	GCA_019188935.1	blood	Egypt: Cairo	2020
94	GCA_019188965.1	blood	Egypt: Cairo	2020
95	GCA_019188985.1	wound	Egypt: Cairo	2020
96	GCA_019506005.2	Wound/Abscess	USA	2021
97	GCA_019506785.2	sputum	USA	2021
98	GCA_019724955.1	Bacterial isolate specimen	USA	2020
99	GCA_019725235.1	Bacterial isolate specimen	USA	2020
100	GCA_019725315.1	Bacterial isolate specimen	USA	2019
101	GCA_019732955.1	Bacterial isolate specimen	USA	2019
102	GCA_019732975.1	Bacterial isolate specimen	USA	2019
103	GCA_019738875.1	Bacterial isolate specimen	USA	2019
104	GCA_019891055.1	sputum	Jordan: Irbid	2018
105	GCA_019891095.1	cerebrospinal fluid	Jordan: Amman	2018
106	GCA_019891135.1	urine	Jordan: Amman	2018
107	GCA_020251225.1	urine	France: Besancon	2020
108	GCA_020251245.1	rectal swab	France: Besancon	2020
109	GCA_020251645.1	not collected	China: Beijing city	2020
110	GCA_020255665.1	Unknown	France: Besancon	2019
111	GCA_020255795.1	Unknown	France: Besancon	2019
112	GCA_020255865.1	rectal swab	France: Besancon	2019
113	GCA_020287085.1	Bronchoalveolar lavage fluid sample	USA	2021
114	GCA_020321875.2	Sputum specimen	USA	2021
115	GCA_020362535.3	blood	USA	2021
116	GCA_020411765.2	wound	USA	2021
117	GCA_020411925.2	wound	USA	2021
118	GCA_020448125.2	urine	USA	2021
119	GCA_020448685.2	stool	USA	2021
120	GCA_020463585.2	Tissue; foot left	USA	2021
121	GCA_020519185.2	blood	USA	2021
122	GCA_020519305.2	Wound; leg right	USA	2021
123	GCA_020546565.2	Bacterial isolate specimen	USA	2021
124	GCA_020551205.1	Bacterial isolate specimen	USA	2021
125	GCA_020557225.2	Bacterial isolate specimen	USA	2021
126	GCA_020585435.2	blood	USA	2021
127	GCA_020606215.2	sputum	USA	2021
128	GCA_020676985.2	Rectal swab	USA	2019
129	GCA_020677145.2	Bacterial isolate specimen	USA	2019
130	GCA_020677645.2	Bacterial isolate specimen	USA	2019
131	GCA_020678185.1	Rectal swab	USA	2019
132	GCA_020838285.2	Skin; axilla/groin	USA	2019
133	GCA_020863785.2	Rectal	USA	2020
134	GCA_020906565.1	Unknown	Germany	2018
135	GCA_021027895.2	blood	USA	2021
136	GCA_021028115.2	Specimen from wound	USA	2021
137	GCA_021145105.1	BAL	Egypt:Cairo	2018
138	GCA_021192455.1	Rawalpindi	Pakistan: Rawalpindi	2019
139	GCA_021273165.2	Skin; Arms/Legs	USA	2021
140	GCA_021274245.2	Skin; arms and legs	USA	2021
141	GCA_021336735.2	skin	USA	2021
142	GCA_021460825.1	Unknown	Nigeria	2020
143	GCA_021578955.2	wound	USA	2021
144	GCA_021686635.2	blood	USA	2021
145	GCA_021868955.2	urine	USA	2019
146	GCA_021869075.2	sputum	USA	2019
147	GCA_021899715.1	Unknown	Germany	2018
148	GCA_022107375.2	sputum	USA	2022
149	GCA_022237785.1	Pleural Fluid	China:Guangdong,Guangzhou	2019
150	GCA_022238805.1	Pleuroperitoneal Fluid	China:Guangdong,Guangzhou	2019
151	GCA_022240485.1	sputum	China:Guangdong,Guangzhou	2019
152	GCA_022383215.2	Unknown	USA	2021
153	GCA_022383435.2	Unknown	USA	2022
154	GCA_022395695.1	throat swab	Bangladesh: Dhaka	2019
155	GCA_022395735.1	tracheal aspirate	Bangladesh: Dhaka	2019
156	GCA_022395855.1	tracheal aspirate	Bangladesh: Dhaka	2019
157	GCA_022395865.1	unknown, clinical	Bangladesh: Dhaka	2020
158	GCA_022395895.1	unknown, clinical	Bangladesh: Dhaka	2020
159	GCA_022476875.2	skin	USA	2021
160	GCA_022588035.2	urine	USA	2022
161	GCA_022661955.1	urine	Croatia: Zagreb	2020
162	GCA_022669215.1	bronchio-nasal eashing	Pakistan	2021
163	GCA_022877745.2	wound	USA	2022
164	GCA_022930795.1	not collected	Saudi Arabia:Al-Ahsa	2019
165	GCA_022931235.1	not collected	Saudi Arabia:Jeddah	2019
166	GCA_022932325.1	not collected	Saudi Arabia:Jeddah	2019
167	GCA_022933845.1	not collected	Saudi Arabia:Medina	2019
168	GCA_022937425.1	sputum	China: Nanchang	2018
169	GCA_022937705.1	bile	China: Nanchang	2018
170	GCA_022937725.1	throat swab	China: Nanchang	2018
171	GCA_022937765.1	sputum	China: Nanchang	2018
172	GCA_022938105.1	not collected	Saudi Arabia:Jeddah	2019
173	GCA_022958355.2	wound	USA	2022
174	GCA_023000235.1	sputum	Thailand: Trang	2019
175	GCA_023000595.1	sputum	Thailand: Trang	2019
176	GCA_023001465.1	sputum	Thailand: Trang	2019
177	GCA_023001865.1	sputum	Thailand: Satun	2019
178	GCA_023001885.1	sputum	Thailand: Satun	2019
179	GCA_023002465.1	sputum	Thailand: Songkhla	2019
180	GCA_023002685.1	sputum	Thailand: Songkhla	2019
181	GCA_023002705.1	sputum	Thailand: Songkhla	2019
182	GCA_023002815.1	sputum	Thailand: Songkhla	2019
183	GCA_023004295.1	pus	Thailand: Phatthalung	2019
184	GCA_023004445.1	sputum	Thailand: Phatthalung	2019
185	GCA_023004805.1	sputum	Thailand: Songkhla	2019
186	GCA_023004985.1	body fluid	Thailand: Songkhla	2019
187	GCA_023005225.1	sputum	Thailand: Songkhla	2019
188	GCA_023005285.1	sputum	Thailand: Songkhla	2019
189	GCA_023005885.1	body fluid	Thailand: Songkhla	2019
190	GCA_023005925.1	urine	Thailand: Songkhla	2019
191	GCA_023006185.1	sputum	Thailand: Pattani	2019
192	GCA_023006265.1	sputum	Thailand: Pattani	2019
193	GCA_023060185.1	blood	Brazil	2020
194	GCA_023061035.1	blood	Brazil	2020
195	GCA_023064415.2	aspirate	USA	2021
196	GCA_023064555.2	skin	USA	2022
197	GCA_023360975.1	blood	China:Zhejiang	2018
198	GCA_023361055.1	blood	China:Liaoning	2018
199	GCA_023397315.2	Bacterial isolate specimen	USA	2019
200	GCA_023517735.1	Nasogastric tube_P44_BU19	China: Hangzhou, Sir Run Run Shaw Hospital ICU	2019
201	GCA_023572255.1	blood	Brazil	2020
202	GCA_023572275.1	blood	Brazil	2020
203	GCA_023572305.1	blood	Brazil	2020
204	GCA_023572445.1	not available	Brazil	2020
205	GCA_023605465.1	sputum	China:Taizhou	2018
206	GCA_023615345.2	sputum	USA	2022
207	GCA_023615665.2	urine	USA	2022
208	GCA_023809625.1	blood	India:Mumbai	2020
209	GCA_024164505.2	blood	USA	2022
210	GCA_024205285.1	patient	China:Hangzhou	2021
211	GCA_024357805.1	blood	Malaysia: Segamat	2020
212	GCA_024357865.1	tracheal aspirate	Malaysia: Segamat	2020
213	GCA_024357895.1	feces	Malaysia: Segamat	2019
214	GCA_024417815.2	wound	USA	2022
215	GCA_024468335.2	Wound/Abscess	USA	2022
216	GCA_024505645.1	tracheal secretion	Brazil	2021
217	GCA_024519105.1	urine		2021
218	GCA_024533735.2	skin	USA	2022
219	GCA_024537755.2	skin	USA	2022
220	GCA_024538065.2	skin	USA	2022
221	GCA_024559125.2	sputum	USA	2021
222	GCA_024560465.2	wound	USA	2022
223	GCA_024589095.1	Blood culture	South Africa	2018
224	GCA_024589115.1	Blood culture	South Africa	2018
225	GCA_024589135.1	Blood culture	South Africa	2018
226	GCA_024649355.1	BAL	Argentina	2021
227	GCA_024922185.2	sputum	USA	2022
228	GCA_025239665.2	sputum	USA	2022
229	GCA_025240845.2	rectal swab	USA	2022
230	GCA_025258785.1	Wound/Abscess	USA	2021
231	GCA_025264005.1	Unknown	China:Jiangsu	2022
232	GCA_025406355.1	Connective tissue	USA: St. Louis	2018
233	GCA_025406475.1	Connective tissue	USA: St. Louis	2018
234	GCA_025406495.1	respiratory tract	USA: St. Louis	2018
235	GCA_025406535.1	Connective tissue	USA: St. Louis	2018
236	GCA_025406555.1	Connective tissue	USA: St. Louis	2018
237	GCA_025406575.1	Endovascular	USA: St. Louis	2018
238	GCA_025406735.1	Urinary tract	USA: St. Louis	2018
239	GCA_025406745.1	respiratory tract	USA: St. Louis	2018
240	GCA_025406795.1	Intraabdominal infection	USA: St. Louis	2018
241	GCA_025406825.1	respiratory tract	USA: St. Louis	2018
242	GCA_025406835.1	Connective tissue	USA: St. Louis	2018
243	GCA_025406925.1	respiratory tract	USA: St. Louis	2018
244	GCA_025407125.1	Connective tissue	USA: St. Louis	2018
245	GCA_025407175.1	Connective tissue	USA: St. Louis	2018
246	GCA_025407255.1	respiratory tract	USA: St. Louis	2019
247	GCA_025407535.1	respiratory tract	USA: St. Louis	2019
248	GCA_025407565.1	Connective tissue	USA: St. Louis	2019
249	GCA_025407605.1	respiratory tract	USA: St. Louis	2019
250	GCA_025457165.1	Unknown	Romania: Bucharest	2019
251	GCA_025457185.1	Unknown	Romania: Targoviste	2019
252	GCA_025457265.1	Unknown	Romania: Targoviste	2019
253	GCA_025732115.1	upper respiratory tract	Russia:Moscow	2019
254	GCA_025826995.1	sputum	United Kingdom:London	2022
255	GCA_025847295.1	Unknown	Serbia	2020
256	GCA_025854095.1	skin	USA	2018
257	GCA_025916215.1	cerebrospinal fluid	China: Hangzhou	2022
258	GCA_025938735.1	feces	Malaysia: Segamat	2019
259	GCA_025938795.1	feces	Malaysia: Segamat	2019
260	GCA_025938915.1	tracheal aspirate	Malaysia: Segamat	2020
261	GCA_025950435.1	blood	Brazil	2021
262	GCA_025971765.1	blood	Brazil	2021
263	GCA_025971805.1	tracheal secretion	Brazil	2021
264	GCA_025971935.1	tracheal secretion	Brazil	2020
265	GCA_026069105.2	Wound/Abscess	USA	2022
266	GCA_026130565.1	physical wound	Bangladesh: Dhaka	2020
267	GCA_026179225.1	Bronchial	USA	2022
268	GCA_026204275.1	urine		2021
269	GCA_026239565.1	tracheal secretion	Brazil	2021
270	GCA_026304555.1	unspecified diagnostic sample	Algeria	2020
271	GCA_026324475.1	urine	Burkina Faso	2020
272	GCA_026327455.1	blood	Nigeria	2020
273	GCA_026347615.1	swab (wound)	Zambia	2020
274	GCA_026348275.1	aspirate	Turkey	2020
275	GCA_026349115.1	sputum	Thailand	2020
276	GCA_026353715.1	urine	Bangladesh	2020
277	GCA_026554895.1	blood	Colombia	2019
278	GCA_026554915.1	blood	Colombia	2019
279	GCA_026555015.1	respiratory	Colombia	2019
280	GCA_026555055.1	urine	Colombia	2019
281	GCA_026555075.1	other	Colombia	2019
282	GCA_026555255.1	wound	Nicaragua	2019
283	GCA_026555855.1	blood	USA	2019
284	GCA_026555875.1	respiratory	USA	2019
285	GCA_026557275.1	wound	USA	2019
286	GCA_026558135.1	respiratory	Australia	2019
287	GCA_026558715.1	other	Lebanon	2019
288	GCA_026558995.1	respiratory	Saudi Arabia	2019
289	GCA_026561495.1	other	Argentina	2019
290	GCA_026561815.1	other	USA	2019
291	GCA_026562515.1	wound	USA	2019
292	GCA_026562535.1	respiratory	USA	2019
293	GCA_026565325.1	urine	USA	2019
294	GCA_026565545.1	respiratory	USA	2019
295	GCA_026566335.1	respiratory	Singapore	2019
296	GCA_026568315.1	blood	Argentina	2019
297	GCA_026568875.1	respiratory	USA	2019
298	GCA_026569335.1	respiratory	USA	2019
299	GCA_026569355.1	blood	USA	2019
300	GCA_026569375.1	respiratory	USA	2019
301	GCA_026622455.1	Unknown	China:Tianjin	2020
302	GCA_026622635.1	Unknown	China:Tianjin	2018
303	GCA_026805095.1	Unknown	China:Hangzhou	2022
304	GCA_026805285.1	Unknown	China:Hangzhou	2022
305	GCA_027084985.1	respiratory	China:Hangzhou	2021
306	GCA_027085405.1	respiratory	China:Hangzhou	2021
307	GCA_027085445.1	respiratory	China:Hangzhou	2021
308	GCA_027085505.1	respiratory	China:Hangzhou	2021
309	GCA_027085555.1	respiratory	China:Hangzhou	2021
310	GCA_027085585.1	respiratory	China:Hangzhou	2021
311	GCA_027085655.1	respiratory	China:Hangzhou	2021
312	GCA_027085825.1	respiratory	China:Hangzhou	2021
313	GCA_027085835.1	respiratory	China:Hangzhou	2021
314	GCA_027085865.1	urine	China:Hangzhou	2021
315	GCA_027085915.1	respiratory	China:Hangzhou	2021
316	GCA_027085955.1	respiratory	China:Hangzhou	2021
317	GCA_027086005.1	respiratory	China:Hangzhou	2021
318	GCA_027086035.1	respiratory	China:Hangzhou	2021
319	GCA_027086085.1	urine	China:Hangzhou	2020
320	GCA_027086145.1	respiratory	China:Hangzhou	2020
321	GCA_027086195.1	urine	China:Hangzhou	2020
322	GCA_027086325.1	respiratory	China:Hangzhou	2020
323	GCA_027086335.1	respiratory	China:Hangzhou	2020
324	GCA_027086355.1	urine	China:Hangzhou	2020
325	GCA_027086515.1	respiratory	China:Hangzhou	2020
326	GCA_027086685.1	respiratory	China:Hangzhou	2019
327	GCA_027088055.1	respiratory	China:Hangzhou	2019
328	GCA_027088235.1	respiratory	China:Hangzhou	2019
329	GCA_027088335.1	respiratory	China:Hangzhou	2019
330	GCA_027088565.1	respiratory	China:Hangzhou	2019
331	GCA_027088625.1	respiratory	China:Hangzhou	2019
332	GCA_027088685.1	respiratory	China:Hangzhou	2019
333	GCA_027088725.1	respiratory	China:Hangzhou	2019
334	GCA_027088735.1	respiratory	China:Hangzhou	2019
335	GCA_027088815.1	respiratory	China:Hangzhou	2019
336	GCA_027089095.1	respiratory	China:Hangzhou	2019
337	GCA_027089265.1	respiratory	China:Hangzhou	2019
338	GCA_027089305.1	respiratory	China:Hangzhou	2019
339	GCA_027089375.1	respiratory	China:Hangzhou	2019
340	GCA_027089495.1	urine	China:Hangzhou	2018
341	GCA_027089585.1	respiratory	China:Hangzhou	2018
342	GCA_027239755.1	blood	China:Beijing	2020
343	GCA_027264315.2	rectal swab	USA	2022
344	GCA_027473145.2	urine	USA	2022
345	GCA_027558855.1	urine	USA	2018
346	GCA_027562405.2	sputum	USA	2022
347	GCA_027620155.1	bronchoalveolar lavage	Russia: Saint-Petersburg	2020
348	GCA_027854475.1	oral sawb	China:Beijing	2020
349	GCA_027854535.1	oral sawb	China:Beijing	2020
350	GCA_027854575.1	oral sawb	China:Beijing	2020
351	GCA_027854725.1	oral sawb	China:Beijing	2020
352	GCA_027854735.1	oral sawb	China:Beijing	2020
353	GCA_027854815.1	oral sawb	China:Beijing	2020
354	GCA_027854865.1	oral sawb	China:Beijing	2020
355	GCA_027854895.1	oral sawb	China:Beijing	2020
356	GCA_027854965.1	oral sawb	China:Beijing	2020
357	GCA_027855035.1	oral sawb	China:Beijing	2020
358	GCA_027855045.1	oral sawb	China:Beijing	2020
359	GCA_027855075.1	oral sawb	China:Beijing	2020
360	GCA_027855085.1	oral sawb	China:Beijing	2020
361	GCA_027855115.1	oral sawb	China:Beijing	2020
362	GCA_027855235.1	oral sawb	China:Beijing	2020
363	GCA_027855315.1	oral sawb	China:Beijing	2020
364	GCA_027855325.1	oral sawb	China:Beijing	2020
365	GCA_027855395.1	oral sawb	China:Beijing	2020
366	GCA_027867265.2	Axilla/Groin Swab	USA	2022
367	GCA_027889895.1	blood	Malaysia	2020
368	GCA_027889935.1	Pus culture	Malaysia	2020
369	GCA_027890055.1	Urine culture	Malaysia	2020
370	GCA_027890075.1	sputum	Malaysia	2020
371	GCA_027890155.1	blood	Malaysia	2020
372	GCA_027890175.1	blood	Malaysia	2020
373	GCA_027890215.1	blood	Malaysia	2020
374	GCA_027890245.1	cerebrospinal fluid	Malaysia	2019
375	GCA_027890295.1	blood	Malaysia	2019
376	GCA_027890335.1	blood	Malaysia	2019
377	GCA_027890415.1	cerebrospinal fluid	Malaysia	2019
378	GCA_027890475.1	blood	Malaysia	2019
379	GCA_027890525.1	Eye swab	Malaysia	2019
380	GCA_027890655.1	body fluid	Malaysia	2019
381	GCA_028051765.3	Tissue	USA	2022
382	GCA_028051805.3	Tissue	USA	2022
383	GCA_028056565.2	urine	USA	2022
384	GCA_028060235.2	tracheal aspirate	USA	2022
385	GCA_028061855.2	urine	USA	2021
386	GCA_028064145.2	sputum	USA	2020
387	GCA_028094885.1	clinical material	Israel	2019
388	GCA_028334975.1	Unknown	China: Guangxi	2020
389	GCA_028438225.1	Unknown	Germany	2019
390	GCA_028438235.1	Unknown	Germany	2019
391	GCA_028438255.1	Unknown	Germany	2019
392	GCA_028438265.1	Unknown	Germany	2020
393	GCA_028438305.1	Unknown	Germany	2019
394	GCA_028438325.1	Unknown	Germany	2019
395	GCA_028438335.1	Unknown	Germany	2019
396	GCA_028438355.1	Unknown	Germany	2019
397	GCA_028438465.1	Unknown	Germany	2019
398	GCA_028438525.1	Unknown	Germany	2019
399	GCA_028543295.2	skin	USA	2022
400	GCA_028544635.1	Burn	USA	2022
401	GCA_028545435.2	Unknown/Unspecified	USA	2022
402	GCA_028548735.1	sputum	China: Anhui	2022
403	GCA_028550055.1	Pleural effusion	China: Anhui	2021
404	GCA_028550215.1	sputum	China: Anhui	2021
405	GCA_028550235.1	sputum	China: Anhui	2021
406	GCA_028576795.2	Urine specimen	USA	2022
407	GCA_028631985.2	bone	USA	2019
408	GCA_028655715.1	Unknown	Russia	2019
409	GCA_028670185.2	Sacrum	USA	2023
410	GCA_028744665.2	Rectal Swab	USA	2023
411	GCA_028744725.2	wound	USA	2023
412	GCA_028745785.1	skin and soft tissue	Russia: Barnaul	2019
413	GCA_028830805.2	urine	USA	2023
414	GCA_028895385.1	Unknown	China: Hangzhou	2018
415	GCA_028898445.2	Unknown/Unspecified	USA	2022
416	GCA_028905805.2	skin	USA	2022
417	GCA_028905865.2	Blood, NOS	USA	2022
418	GCA_029033725.2	blood	USA	2023
419	GCA_029279065.2	Tissue	USA	2023
420	GCA_029437655.1	wound	USA	2023
421	GCA_029437675.1	wound; lt leg	USA	2023
422	GCA_029441315.1	clinical isolate	Italy: Pavia	2020
423	GCA_029441375.1	clinical isolate	Italy: Pavia	2020
424	GCA_029441795.1	clinical isolate	Italy: Pavia	2019
425	GCA_029441875.1	clinical isolate	Italy: Pavia	2019
426	GCA_029678095.1	blood	Cambodia: Phnom Penh	2022
427	GCA_029679345.1	tracheal aspirate	Serbia	2020
428	GCA_029679545.1	blood	Serbia	2020
429	GCA_029713725.1	not collected	Saudi Arabia:Medina	2019
430	GCA_029713785.1	not collected	Saudi Arabia:Riyadh	2019
431	GCA_029713805.1	not collected	Saudi Arabia:Riyadh	2019
432	GCA_029713845.1	not collected	Saudi Arabia:Riyadh	2019
433	GCA_029713865.1	not collected	Saudi Arabia:Jeddah	2019
434	GCA_029713945.1	not collected	Saudi Arabia:Jeddah	2019
435	GCA_029713985.1	not collected	Saudi Arabia:Medina	2019
436	GCA_029714105.1	not collected	Saudi Arabia:Riyadh	2019
437	GCA_029714165.1	not collected	Saudi Arabia:Medina	2019
438	GCA_029731135.2	Bronchial Wash	USA	2023
439	GCA_029731235.2	rectal swab	USA	2023
440	GCA_029735075.2	Transtracheal aspirate sample	USA	2023
441	GCA_029736135.2	wound	USA	2022
442	GCA_029737005.2	Bronchial Wash (Lavage)	USA	2022
443	GCA_029761825.1	Perianal swab	Ukraine	2022
444	GCA_029774195.1	Unknown	China: Hangzhou	2021
445	GCA_029814975.1	not available	Taiwan	2020
446	GCA_029872025.1	sputum	China: Anhui	2022
447	GCA_029955865.1	blood	Ecuador: Quito	2022
448	GCA_029956025.1	blood	Ecuador: Quito	2022
449	GCA_030016845.1	blood	Ecuador: Quito	2022
450	GCA_030055835.1	Blood culture	Nigeria	2018
451	GCA_030055935.1	Blood culture	Nigeria	2018
452	GCA_030055945.1	Blood culture	Nigeria	2018
453	GCA_030056045.1	Blood culture	Nigeria	2019
454	GCA_030056075.1	Blood culture	Nigeria	2019
455	GCA_030056085.1	Blood culture	Nigeria	2018
456	GCA_030056115.1	Blood culture	Nigeria	2018
457	GCA_030056155.1	Blood culture	Nigeria	2019
458	GCA_030124705.1	vent. liquor	Russia: Moscow	2018
459	GCA_030125085.1	lumbar liquor	Russia: Moscow	2018
460	GCA_030125165.1	vent. liquor	Russia: Moscow	2018
461	GCA_030125195.1	lumbar liquor	Russia: Moscow	2018
462	GCA_030137065.1	Unknown	China:Guangdong	2021
463	GCA_030137205.1	Unknown	China:Guangdong	2021
464	GCA_030137435.1	Unknown	China:Guangdong	2021
465	GCA_030137465.1	Unknown	China:Guangdong	2021
466	GCA_030137505.1	Unknown	China:Guangdong	2021
467	GCA_030139285.1	Unknown	China:Guangdong	2021
468	GCA_030139305.1	Unknown	China:Guangdong	2021
469	GCA_030139355.1	Unknown	China:Guangdong	2021
470	GCA_030139375.1	Unknown	China:Guangdong	2021
471	GCA_030139565.1	Unknown	China:Guangdong	2021
472	GCA_030139575.1	Unknown	China:Guangdong	2021
473	GCA_030139715.1	Unknown	China:Guangdong	2021
474	GCA_030139845.1	Unknown	China:Guangdong	2021
475	GCA_030139925.1	Unknown	China:Guangdong	2021
476	GCA_030139995.1	Unknown	China:Guangdong	2021
477	GCA_030140025.1	Unknown	China:Guangdong	2021
478	GCA_030140055.1	Unknown	China:Guangdong	2021
479	GCA_030140165.1	Unknown	China:Guangdong	2021
480	GCA_030140255.1	Unknown	China:Guangdong	2021
481	GCA_030140385.1	Unknown	China:Guangdong	2021
482	GCA_030140445.1	Unknown	China:Guangdong	2021
483	GCA_030140495.1	Unknown	China:Guangdong	2021
484	GCA_030141365.1	Unknown	China:Guangdong	2021
485	GCA_030141435.1	Unknown	China:Guangdong	2021
486	GCA_030141465.1	Unknown	China:Guangdong	2021
487	GCA_030141485.1	Unknown	China:Guangdong	2021
488	GCA_030186695.1	sputum	China: Chengdu, Sichuan	2019
489	GCA_030193435.1	sputum	China:Liaocheng	2021
490	GCA_030197375.1	sputum	China:Liaocheng	2021
491	GCA_030197875.1	sputum	China:Liaocheng	2021
492	GCA_030198075.1	sputum	China:Liaocheng	2020
493	GCA_030283985.1	wound	Australia:Melbourne	2019
494	GCA_030380765.3	blood	India: Karnataka	2019
495	GCA_030380785.3	Endotracheal Aspirate	India: Karnataka	2019
496	GCA_030448525.1	sputum	China:Gansu	2021
497	GCA_030483925.1	Rectal	Spain: Hospital Virgen de la Arrixaca	2020
498	GCA_030484025.1	Ulcer	Spain: University Hospital Complex A Coruna	2020
499	GCA_030484145.1	wound	Spain: Hospital Virgen de la Arrixaca	2020
500	GCA_030484165.1	blood	Spain: H. U. Puerta del Mar	2020
501	GCA_030484245.1	Rectal	Spain: University Hospital Joan XXIII	2020
502	GCA_030484305.1	urine	Spain: Hospital Arquitecto Marcide	2020
503	GCA_030484315.1	wound	Spain: University Hospital Complex A Coruna	2020
504	GCA_030484345.1	sputum	Spain: University Hospital Arnau de Vilanova	2020
505	GCA_030484355.1	Ulcer	Spain: University Hospital Joan XXIII	2020
506	GCA_030484385.1	Rectal	Spain: University Hospital Arnau de Vilanova	2020
507	GCA_030484445.1	Rectal	Spain: University Hospital Complex A Coruna	2020
508	GCA_030484455.1	sputum	Spain: University Hospital Reina Sofia	2020
509	GCA_030484505.1	wound	Spain: University Hospital of Basurto	2020
510	GCA_030484525.1	Rectal	Spain: University Hospital of Alava	2020
511	GCA_030484535.1	wound	Spain: University Hospital Reina Sofia	2020
512	GCA_030484585.1	wound	Spain: University Hospital of Basurto	2020
513	GCA_030484605.1	sputum	Spain: University Hospital of Basurto	2020
514	GCA_030484635.1	wound	Spain: University Hospital of Basurto	2020
515	GCA_030484655.1	wound	Spain: Clinical University Hospital of Valencia	2020
516	GCA_030484685.1	Axilla swab	Spain: University Hospital Arnau de Vilanova	2020
517	GCA_030484745.1	Bronchial aspirate	Spain: University Hospital Virgen del Rocio	2020
518	GCA_030484805.1	urine	Spain: Hospital Virgen de la Arrixaca	2020
519	GCA_030484825.1	Rectal	Spain: University Hospital Arnau de Vilanova	2020
520	GCA_030484845.1	urine	Spain: University Hospital Arnau de Vilanova	2020
521	GCA_030484885.1	Rectal	Spain: Hospital Virgen de la Arrixaca	2020
522	GCA_030484925.1	blood	Spain: Hospital Virgen de la Arrixaca	2020
523	GCA_030484945.1	blood	Spain: Hospital Virgen de la Arrixaca	2020
524	GCA_030484985.1	Rectal	Spain: Hospital Virgen de la Arrixaca	2020
525	GCA_030485065.1	Rectal	Spain: University Hospital Central de Asturias	2020
526	GCA_030485095.1	Bronchial aspiration	Spain: Son Espases	2020
527	GCA_030485165.1	Rectal	Spain: University Hospital Central de Asturias	2020
528	GCA_030485195.1	Rectal	Spain: University Hospital Central de Asturias	2020
529	GCA_030485285.1	Ulcer	Spain: H. U. Puerta del Mar	2020
530	GCA_030485295.1	blood	Spain: H. U. Puerta del Mar	2020
531	GCA_030485325.1	Rectal	Spain: H. U. Puerta del Mar	2020
532	GCA_030485345.1	wound	Spain: Son Espases	2020
533	GCA_030485365.1	Rectal	Spain: H. U. Puerta del Mar	2020
534	GCA_030485415.1	Rectal	Spain: H. U. Puerta del Mar	2020
535	GCA_030485445.1	wound	Spain: H. U. Puerta del Mar	2020
536	GCA_030485585.1	tracheal aspirate	Spain: Clinical University Hospital of Valencia	2020
537	GCA_030485705.1	urine	Spain: Clinical University Hospital of Valencia	2020
538	GCA_030485905.1	urine	Spain: University Hospital of Canarias	2020
539	GCA_030486175.1	urine	Spain: Hospital Virgen de las Nieves	2020
540	GCA_030486185.1	Bronchial secretion	Spain: University Hospital Complex A Coruna	2020
541	GCA_030486265.1	Ulcer	Spain: Clinical University Hospital of Valencia	2020
542	GCA_030486545.1	urine	Spain: University Hospital Central de Asturias	2020
543	GCA_030516365.1	sputum	Egypt: Alexandria	2020
544	GCA_030516405.1	MiniBAL	Egypt: Alexandria	2020
545	GCA_030516565.1	swab	Egypt: Alexandria	2020
546	GCA_030516665.1	MiniBAL	Egypt: Alexandria	2020
547	GCA_030516785.1	MiniBAL	Egypt: Alexandria	2020
548	GCA_030541725.1	Bronchoalveolar lavage fluid	Russia:Moscow	2023
549	GCA_030541845.1	endotracheal aspirate	Russia:Moscow	2023
550	GCA_030550955.1	tracheal secretion	Brazil: Rio de Janeiro	2022
551	GCA_030585365.1	Skin/Wound	USA: WI	2019
552	GCA_030755375.1	Unknown	Turkey	2020
553	GCA_030755405.1	Unknown	USA	2020
554	GCA_030755435.1	Unknown	Australia	2020
555	GCA_030755495.1	Unknown	Turkey	2020
556	GCA_030755585.1	Unknown	Guatemala	2020
557	GCA_030755635.1	Unknown	Belgium	2020
558	GCA_030755655.1	Unknown	Guatemala	2019
559	GCA_030755755.1	Unknown	Guatemala	2019
560	GCA_030755815.1	Unknown	Guatemala	2019
561	GCA_030755835.1	Unknown	Guatemala	2019
562	GCA_030851005.1	wound	USA: California, Los Angeles County	2023
563	GCA_030851625.1	bronchoalveolar lavage	USA: California, Los Angeles County	2023
564	GCA_031081645.1	Unknown	Russia	2022
565	GCA_031099775.1	wound	USA	2023
566	GCA_031100955.1	tracheal aspirate	Brazil	2020
567	GCA_031103625.1	tissue	USA	2023
568	GCA_031111945.1	Unknown	USA	2023
569	GCA_031114915.1	Unknown	USA	2019
570	GCA_031115335.1	wound	USA	2023
571	GCA_031115375.1	sputum	USA	2023
572	GCA_031116195.1	Specimen from wound	USA	2023
573	GCA_031129055.1	stool	USA	2023
574	GCA_031129235.1	other	USA	2023
575	GCA_031134295.1	Axilla/Groin	USA	2023
576	GCA_031135265.1	Respiratory processed	USA	2023
577	GCA_031135985.1	Rectal Swab	USA	2023
578	GCA_031136115.1	wound	USA	2023
579	GCA_031138495.1	other	USA	2023
580	GCA_031140305.1	Wound/Abscess	USA	2023
581	GCA_031144035.1	Axilla/Groin	USA	2023
582	GCA_031145905.1	Axilla/Groin	USA	2023
583	GCA_031150345.1	wound	USA	2021
584	GCA_031150665.1	wound	USA	2023
585	GCA_031152015.1	wound	USA	2023
586	GCA_031156205.1	urine	Serbia	2018
587	GCA_031156315.1	wound	Serbia	2018
588	GCA_031195815.1	blood	China: Jiangsu,Nanjing	2022
589	GCA_031195835.1	blood	China: Jiangsu,Nanjing	2022
590	GCA_031195915.1	blood	China: Jiangsu,Nanjing	2022
591	GCA_031195975.1	blood	China: Jiangsu,Nanjing	2021
592	GCA_031196035.1	blood	China: Jiangsu,Nanjing	2021
593	GCA_031196065.1	blood	China: Jiangsu,Nanjing	2021
594	GCA_031196235.1	blood	China: Jiangsu,Nanjing	2021
595	GCA_031196365.1	blood	China: Jiangsu,Nanjing	2021
596	GCA_031196395.1	blood	China: Jiangsu,Nanjing	2021
597	GCA_031196475.1	blood	China: Jiangsu,Nanjing	2021
598	GCA_031196575.1	blood	China: Jiangsu,Nanjing	2021
599	GCA_031196695.1	blood	China: Jiangsu,Nanjing	2020
600	GCA_031197375.1	blood	China: Jiangsu,Nanjing	2019
601	GCA_031197535.1	blood	China: Jiangsu,Nanjing	2019
602	GCA_031197695.1	blood	China: Jiangsu,Nanjing	2019
603	GCA_031197895.1	blood	China: Jiangsu,Nanjing	2019
604	GCA_031463875.1	Thigh, Left	USA	2023
605	GCA_031875485.1	clinical sample	Switzerland	2022
606	GCA_031875585.1	clinical sample	Switzerland	2022
607	GCA_031875665.1	clinical sample	Switzerland	2021
608	GCA_031875785.1	clinical sample	Switzerland	2021
609	GCA_031875865.1	clinical sample	Switzerland	2021
610	GCA_031875885.1	clinical sample	Switzerland	2021
611	GCA_031876875.1	clinical sample	Switzerland	2021
612	GCA_031876955.1	clinical sample	Switzerland	2019
613	GCA_031877755.1	clinical sample	Switzerland	2022
614	GCA_031878035.1	clinical sample	Switzerland	2022
615	GCA_032251855.1	tracheal aspirate	USA: California, Los Angeles County	2023
616	GCA_032252355.1	wound	USA: California, Los Angeles County	2023
617	GCA_032461485.1	Unknown	India: Indore	2021
618	GCA_032630425.1	Homo Sapiens clinical	USA: Florida	2023
619	GCA_032803625.1	Unknown	Russia	2022
620	GCA_032803645.1	Unknown	Russia	2022
621	GCA_032849505.1	wound	USA	2023
622	GCA_032849985.1	wound	USA	2023
623	GCA_033093565.1	clinical sample	Switzerland	2021
624	GCA_033142715.1	Bronchial secretions	Greece	2023
625	GCA_033142815.1	Bronchial secretions	Greece	2023
626	GCA_033180185.1	Tissue	USA	2023
627	GCA_033187155.1_ASM3318715v1_genomic.fna	oral swab	France: Marcy l'etoile	2021
628	GCA_033189955.1_ASM3318995v1_genomic.fna	oral swab	France: Marcy l'etoile	2021
629	GCA_033190015.1_ASM3319001v1_genomic.fna	oral swab	France: Marcy l'etoile	2021
630	GCA_033190095.1_ASM3319009v1_genomic.fna	oral swab	France: Marcy l'etoile	2021
631	GCA_033192035.1_ASM3319203v1_genomic.fna	oral swab	France: Marcy l'etoile	2021
632	GCA_033194595.1	clinical	Fiji	2019
633	GCA_033345395.1	Left foot swab	USA	2023
634	GCA_033726355.1	wound	USA	2023
635	GCA_033860375.1	wound	USA	2023
636	GCA_034023535.1	urine	USA	2023
637	GCA_034258825.1	sputum	USA: California, Los Angeles County	2023
638	GCA_034260915.1	urine	USA	2023
639	GCA_034296475.1	tracheal secretion	Paraguay: Asuncion	2021
640	GCA_034296595.1	tracheal secretion	Paraguay: Asuncion	2021
641	GCA_034296675.1	tracheal secretion	Paraguay: Asuncion	2021
642	GCA_034296735.1	purulent discharge	Paraguay: Asuncion	2021
643	GCA_034296765.1	blood culture	Paraguay: Asuncion	2021
644	GCA_034296805.1	purulent discharge	Paraguay: Asuncion	2021
645	GCA_034296825.1	blood culture	Paraguay: Asuncion	2022
646	GCA_034296945.1	blood culture	Paraguay: Asuncion	2021
647	GCA_034296995.1	purulent discharge	Paraguay: Asuncion	2021
648	GCA_034297175.1	tracheal secretion	Paraguay: Asuncion	2021
649	GCA_034297215.1	tracheal secretion	Paraguay: Asuncion	2021
650	GCA_034299055.1	wound	USA: Pittsburgh, Pennsylvania	2023
651	GCA_034318645.1	wound	USA: California, Los Angeles County	2023
652	GCA_929606855.1	screen	United Kingdom	2018
653	GCA_929618485.1	sputum	United Kingdom	2018
654	S1_R10	Blood	India: Chattisgarh	2020
655	S1_R18_R1	Neonate blood	India: Chattisgarh	2016
656	S1_R8	Respiratory	India: Chattisgarh	2020
657	S10_R18_R1	Neonate blood	India: Chattisgarh	2016
658	S11_R18_R1	Neonate blood	India: Chattisgarh	2016
659	S11_R8	Others	India: Chattisgarh	2020
660	S12_R18_R1	Neonate blood	India: Chattisgarh	2016
661	S13_R11	Blood	India: Chattisgarh	2020
662	S13_R18_R1	Neonate blood	India: Chattisgarh	2016
663	S13_R8	Others	India: Chattisgarh	2020
664	S14_R10	Others	India: Chattisgarh	2020
665	S14_R18_R1	Neonate blood	India: Chattisgarh	2016
666	S15_R18_R1	Neonate blood	India: Chattisgarh	2016
667	S16_R8	Blood	India: Chattisgarh	2020
668	S18_R12	Respiratory	India: Chattisgarh	2020
669	S2_R18_R1	Neonate blood	India: Chattisgarh	2016
670	S25_R12	Unknown	India: Chattisgarh	2020
671	S26_R12	Unknown	India: Chattisgarh	2020
672	S28_R12	Unknown	India: Chattisgarh	2020
673	S28_R8	Others	India: Chattisgarh	2019
674	S3_R18_R1	Neonate blood	India: Chattisgarh	2016
675	S30_R8	Respiratory	India: Chattisgarh	2020
676	S32_R12	Unknown	India: Chattisgarh	Unknown
677	S35_R12	Unknown	India: Chattisgarh	Unknown
678	S36_R12	Unknown	India: Chattisgarh	Unknown
679	S36_R8	Others	India: Chattisgarh	2020
680	S39_R12	Unknown	India: Chattisgarh	Unknown
681	S4_R18_R1	Neonate blood	India: Chattisgarh	2016
682	S40_R12	Unknown	India: Chattisgarh	Unknown
683	S40_R8	Others	India: Chattisgarh	2020
684	S5_R18_R1	Neonate blood	India: Chattisgarh	2016
685	S6_R18_R1	Neonate blood	India: Chattisgarh	2016
686	S7_R18_R1	Neonate blood	India: Chattisgarh	2016
687	S8_R18_R1	Neonate blood	India: Chattisgarh	2016
688	S9_R18_R1	Neonate blood	India: Chattisgarh	2016
689	S9_R9	Respiratory	India: Chattisgarh	2020

## Sheet: S7e
Table S7e: Metadata of clinical P. aeruginosa isolates from NCBI database
S. No.	Assembly	Sample source	Location	Year of collection
1	GCA_004684765.1	fluid	Canada: Vancouver	2019
2	GCA_004790695.1	Wound swab	Sudan: Khartoum	2019
3	GCA_007566955.1	wound	Kazakhstan: Almaty	2019
4	GCA_007567125.1	wound	Kazakhstan: Almaty	2019
5	GCA_008802415.1	Unknown	USA	2019
6	GCA_008802455.1	Unknown	USA	2019
7	GCA_008802475.1	Unknown	USA	2019
8	GCA_008802495.1	Unknown	USA	2019
9	GCA_008802505.1	Unknown	USA	2019
10	GCA_008802595.1	Unknown	USA	2019
11	GCA_008802635.1	Unknown	USA	2019
12	GCA_014217315.1	the sputum of a pneumonia patient	China: Shandong	2019
13	GCA_014467035.1	Draining sinus tract from infected LVAD patient	USA	2019
14	GCA_014712765.1	Unknown	Bangladesh:Dhaka	2019
15	GCA_015666575.1	blood	Brazil	2020
16	GCA_016054875.1	blood	Brazil	2020
17	GCA_016055545.1	blood	Brazil	2020
18	GCA_016584725.1	Unknown	China:Shenzhen,Guangdong	2020
19	GCA_016792065.1	Ear swab	United Kingdom: London	2019
20	GCA_017168745.1	Unknown	Kenya:Nairobi	2019
21	GCA_017378395.1	Unknown	China:Shenzhen	2020
22	GCA_018457025.1	cell culture	Lebanon: Notre Dame University Hospital	2020
23	GCA_018457045.1	deep tracheal aspirate (DTA)	Lebanon: Makassed General Hospital	2020
24	GCA_018551515.1	sputum	Lebanon: Middle East Institute of Health	2020
25	GCA_018598285.3	Tracheal secretion	Brazil	2020
26	GCA_018724965.1	sputum	USA: San Diego	2021
27	GCA_018736165.1	sputum sample	USA: San Diego	2020
28	GCA_019281315.1	Unknown	USA: Maine	2019
29	GCA_019281715.1	Unknown	USA: Maine	2020
30	GCA_019281735.1	Unknown	USA: Maine	2019
31	GCA_019281935.1	Unknown	USA: Maine	2019
32	GCA_019915445.1	Swab from Wound	Kazakhstan: Almaty	2021
33	GCA_019915465.1	Swab from tracheostomic tube	Kazakhstan: Almaty	2021
34	GCA_019991065.1	sputum	China:Henan	2019
35	GCA_020035985.1	Ward	China: Zhejiang	2019
36	GCA_020036015.1	Ward	China: Zhejiang	2020
37	GCA_020036055.1	Ward	China: Zhejiang	2020
38	GCA_020036115.1	Ward	China: Zhejiang	2019
39	GCA_020036135.1	Ward	China: Zhejiang	2020
40	GCA_020036155.1	Ward	China: Zhejiang	2019
41	GCA_020036335.1	Ward	China: Zhejiang	2019
42	GCA_020036505.1	Ward	China: Zhejiang	2019
43	GCA_020036555.1	Ward	China: Zhejiang	2019
44	GCA_020036605.1	Ward	China: Zhejiang	2020
45	GCA_020036615.1	Ward	China: Zhejiang	2020
46	GCA_020036785.1	Ward	China: Zhejiang	2019
47	GCA_020036875.1	Ward	China: Zhejiang	2019
48	GCA_020036955.1	Ward	China: Zhejiang	2020
49	GCA_020251605.1	not collected	China: Beijing city	2020
50	GCA_020404715.1	wound swab	Serbia	2019
51	GCA_020567355.1	sputum	China: Shanghai	2019
52	GCA_020567465.1	urine	China: Shanghai	2019
53	GCA_020639475.1	blood	Unknown	2019
54	GCA_020639915.1	blood	Unknown	2020
55	GCA_020639945.1	blood	Unknown	2019
56	GCA_020639995.1	blood	Unknown	2019
57	GCA_020640135.1	blood	Unknown	2019
58	GCA_020640525.1	blood	Unknown	2019
59	GCA_020640605.1	blood	Unknown	2020
60	GCA_020640655.1	blood	Unknown	2019
61	GCA_020640835.1	blood	Unknown	2020
62	GCA_021012755.1	bronchoalveolar lavage (BAL)	Italy: Ancona	2019
63	GCA_021060455.1	Unknown	Spain	2019
64	GCA_021060495.1	Unknown	Spain	2019
65	GCA_021060525.1	Unknown	Spain	2019
66	GCA_021060575.1	Unknown	Spain	2019
67	GCA_021060655.1	Unknown	Spain	2019
68	GCA_021060745.1	Unknown	Spain	2019
69	GCA_021061105.1	Unknown	Spain	2019
70	GCA_021061225.1	Unknown	Spain	2019
71	GCA_021061355.1	Unknown	Spain	2019
72	GCA_021061445.1	Unknown	Spain	2019
73	GCA_021061525.1	Unknown	Spain	2019
74	GCA_021184245.1	sputum	China: Jinan, Shandong province	2019
75	GCA_021184265.1	urine	China: Jinan, Shandong province	2019
76	GCA_021245865.1	pus	China: Shanghai	2021
77	GCA_021266605.1	sputum	China:Zhuhai	2021
78	GCA_021398755.1	broncho alveolar lavage fluid	China: Zhuhai	2021
79	GCA_021460035.1	Unknown	United Kingdom	2020
80	GCA_021460705.1	Unknown	United Kingdom	2021
81	GCA_021585115.2	Wound/Abscess	USA	2021
82	GCA_021585175.2	urine	USA	2021
83	GCA_021591045.1	hospital	Germany	2020
84	GCA_021592925.1	Bronchial aspirate	Belgium: Jette	2019
85	GCA_021592985.1	Bronchial aspirate	Belgium: Jette	2019
86	GCA_021593125.1	sputum	Belgium: Jette	2019
87	GCA_021593505.1	Wound swab femur	Belgium: Jette	2019
88	GCA_021593585.1	blood	Belgium: Jette	2019
89	GCA_021593705.1	Endotracheal aspirate	Belgium: Jette	2019
90	GCA_021593725.1	Deep nose smear	Belgium: Jette	2019
91	GCA_021593865.1	urine	Belgium: Jette	2019
92	GCA_021593945.1	sputum	Belgium: Jette	2019
93	GCA_021594025.1	Smear coccyx	Belgium: Jette	2019
94	GCA_021601805.1	bronchoalveolar lavage	USA	2021
95	GCA_021601825.2	Tissue	USA	2021
96	GCA_021601905.1	urine	USA	2021
97	GCA_021601945.2	urine	USA	2021
98	GCA_021601965.2	Wound/Abscess	USA	2021
99	GCA_021601985.1	Wound/Abscess	USA	2021
100	GCA_021642505.1	sputum	USA	2021
101	GCA_021642725.2	Bacterial isolate specimen	USA	2019
102	GCA_021642885.2	Bacterial isolate specimen	USA	2019
103	GCA_021643105.1	Bacterial isolate specimen	USA	2019
104	GCA_021643205.2	Tracheal Aspirate/Wash	USA	2021
105	GCA_021643345.2	sputum	USA	2021
106	GCA_021643385.2	sputum	USA	2021
107	GCA_021643525.2	sputum	USA	2021
108	GCA_021643665.2	Bacterial isolate specimen	USA	2021
109	GCA_021643865.2	Bacterial isolate specimen	USA	2021
110	GCA_021644285.3	Wound/Abscess	USA	2021
111	GCA_021644545.2	other	USA	2021
112	GCA_021644645.2	Wound/Abscess	USA	2021
113	GCA_021644705.2	Wound/Abscess	USA	2021
114	GCA_021645365.2	urine	USA	2021
115	GCA_021645585.2	urine	USA	2021
116	GCA_021660855.2	Wound/Abscess	USA	2021
117	GCA_021660895.1	blood	Spain: A Coruna	2020
118	GCA_021660915.1	abdominal fluid	Spain: A Coruna	2020
119	GCA_021661355.2	Tissue - Abdomen	USA	2020
120	GCA_021661435.2	tracheal aspirate	USA	2021
121	GCA_021661475.3	Wound/Abscess	USA	2021
122	GCA_021661575.2	sputum	USA	2021
123	GCA_021661815.1	tracheal aspirate	Spain: A Coruna	2020
124	GCA_021661835.1	tracheal aspirate	Spain: A Coruna	2020
125	GCA_021664915.2	Wound/Abscess	USA	2020
126	GCA_021665595.2	bronchoalveolar lavage	USA	2020
127	GCA_021669235.2	Wound/Abscess	USA	2020
128	GCA_021669315.2	urine	USA	2020
129	GCA_021687695.2	tracheal aspirate/wash	USA	2021
130	GCA_021689395.3	sputum	USA	2021
131	GCA_021705655.2	other	USA	2020
132	GCA_021705715.2	other	USA	2020
133	GCA_021705795.2	urine	USA	2019
134	GCA_021705835.2	other	USA	2019
135	GCA_021708155.1	urine	Canada: Manitoba	2019
136	GCA_021752405.1	tracheal aspirate	USA	2021
137	GCA_022106375.2	Wound/Abscess	USA	2022
138	GCA_022342835.1	sputum	China:Beijing	2019
139	GCA_022551775.1	Unknown	Russia: Moscow	2020
140	GCA_022551915.1	Unknown	Russia: Moscow	2020
141	GCA_022551935.1	Unknown	Russia: Moscow	2020
142	GCA_022551985.1	Unknown	Russia: Moscow	2020
143	GCA_022552035.1	Unknown	Russia: Moscow	2020
144	GCA_022552055.1	Unknown	Russia: Moscow	2020
145	GCA_022552095.1	Unknown	Russia: Moscow	2020
146	GCA_022552295.1	Unknown	Russia: Samara	2020
147	GCA_022552355.1	Unknown	Russia: Samara	2020
148	GCA_022552375.1	Unknown	Russia: Samara	2020
149	GCA_022552415.1	Unknown	Russia: Samara	2020
150	GCA_022552455.1	Unknown	Russia: Samara	2020
151	GCA_022552475.1	Unknown	Russia: Samara	2020
152	GCA_022552485.1	Unknown	Russia: Samara	2020
153	GCA_022552575.1	Unknown	Russia: Samara	2020
154	GCA_022552585.1	Unknown	Russia: Samara	2020
155	GCA_022552655.1	Unknown	Russia: Samara	2020
156	GCA_022552695.1	Unknown	Russia: Samara	2020
157	GCA_022552705.1	Unknown	Russia: Samara	2020
158	GCA_022552735.1	Unknown	Russia: Samara	2020
159	GCA_022552775.1	Unknown	Russia: Samara	2020
160	GCA_022552805.1	Unknown	Russia: Samara	2020
161	GCA_022552835.1	Unknown	Russia: Samara	2020
162	GCA_022552865.1	Unknown	Russia: Samara	2020
163	GCA_022552935.1	Unknown	Russia: Moscow	2020
164	GCA_022553015.1	Unknown	Russia: Moscow	2020
165	GCA_022553075.1	Unknown	Russia: Moscow	2020
166	GCA_022553095.1	Unknown	Russia: Moscow	2020
167	GCA_022553115.1	Unknown	Russia: Moscow	2020
168	GCA_022553155.1	Unknown	Russia: Moscow	2020
169	GCA_022555735.1	Unknown	Russia: Moscow	2020
170	GCA_022555775.1	Unknown	Russia: Moscow	2020
171	GCA_022555805.1	Unknown	Russia: Moscow	2020
172	GCA_022555905.1	Unknown	Russia: Moscow	2020
173	GCA_022556155.1	Unknown	Russia: Moscow	2020
174	GCA_022871885.2	other	USA	2022
175	GCA_022916515.2	urine	USA	2022
176	GCA_022958375.2	Urine, Catheterized	USA	2022
177	GCA_022958455.3	sputum	USA	2022
178	GCA_022958515.2	other	USA	2022
179	GCA_023060395.1	not available	Brazil	2019
180	GCA_023060405.1	trachea fragment	Brazil	2019
181	GCA_023060435.1	tracheal secretion	Brazil	2019
182	GCA_023101265.1	rectal swab	China:Zhejiang province,Hangzhou	2021
183	GCA_023114035.2	urine	USA	2021
184	GCA_023340315.1	hospital	Germany	2021
185	GCA_023343275.1	hospital	Germany	2021
186	GCA_023345685.1	hospital	Germany	2021
187	GCA_023520735.1	BAL	USA:Chicago	2020
188	GCA_023572735.1	skin fragement	Brazil	2019
189	GCA_023615765.2	urine	USA	2022
190	GCA_023647235.1	hip prothesis biopsy	USA: Mayo Clinic, Rochester, Minnesota	2020
191	GCA_023673485.1	Endotracheal Aspirate	Australia:Queensland	2020
192	GCA_023673545.1	blood	Australia:Queensland	2020
193	GCA_023675465.1	Endotracheal Aspirate	Australia:Queensland	2021
194	GCA_023683365.1	Endotracheal Aspirate	Australia:Queensland	2021
195	GCA_023691585.1	Venous Blood	Australia:Queensland	2019
196	GCA_023717805.1	BALs	China: Chengdu	2020
197	GCA_023717925.1	BALs	China: Chengdu	2020
198	GCA_023717975.1	BALs	China: Chengdu	2020
199	GCA_023760635.1	blood	Australia:Queensland	2019
200	GCA_023761365.1	Pancreatic Tissue	Australia:Queensland	2019
201	GCA_023818395.1	sputum	China	2021
202	GCA_023844285.1	wound	United Kingdom: Bradford	2022
203	GCA_023887665.1	blood	China	2021
204	GCA_023918525.1	Intensive Care Unit	France: Besancon	2019
205	GCA_023918585.1	Intensive Care Unit	France: Besancon	2019
206	GCA_023918845.1	Intensive Care Unit	France: Besancon	2019
207	GCA_023921025.1	Intensive Care Unit	France: Besancon	2019
208	GCA_023923645.1	Intensive Care Unit	France: Besancon	2019
209	GCA_023923965.1	Intensive Care Unit	France: Besancon	2019
210	GCA_023932905.1	Intensive Care Unit	France: Besancon	2019
211	GCA_023934345.1	Intensive Care Unit	France: Besancon	2019
212	GCA_023935165.1	Intensive Care Unit	France: Besancon	2019
213	GCA_023935885.1	Intensive Care Unit	France: Besancon	2019
214	GCA_023935945.1	Intensive Care Unit	France: Besancon	2019
215	GCA_023938225.1	Intensive Care Unit	France: Besancon	2019
216	GCA_023938545.1	Intensive Care Unit	France: Besancon	2019
217	GCA_023940505.1	Intensive Care Unit	France: Besancon	2019
218	GCA_023945295.1	Intensive Care Unit	France: Besancon	2019
219	GCA_023946335.1	Intensive Care Unit	France: Besancon	2019
220	GCA_023958495.1	mid-stream urine	China: Guangzhou	2022
221	GCA_023991915.1	balf	China: Beijing	2019
222	GCA_023992015.1	balf	China: Beijing	2020
223	GCA_024073245.1	Unknown	Unknown	2019
224	GCA_024073545.1	Bronchial aspirate	Switzerland	2020
225	GCA_024176125.1	Intensive Care Unit	France: Besancon	2019
226	GCA_024176205.1	Intensive Care Unit	France: Besancon	2019
227	GCA_024176445.1	Intensive Care Unit	France: Besancon	2019
228	GCA_024266935.1	endotracheal aspirate	Chile	2019
229	GCA_024300845.1	Drainage	China: Hangzhou	2020
230	GCA_024367355.2	sputum	USA	2022
231	GCA_024372765.1	sputum	Denmark	2019
232	GCA_024482305.1	sputum	Denmark	2019
233	GCA_024482825.1	sputum	Denmark	2019
234	GCA_024482885.1	sputum	Denmark	2019
235	GCA_024483125.1	sputum	Denmark	2019
236	GCA_024532695.2	swab	USA	2020
237	GCA_024537895.2	swab	USA	2020
238	GCA_024615665.1	feces	USA: Utah	2019
239	GCA_024615725.1	feces	USA: Utah	2020
240	GCA_024633395.1	feces	USA: Utah	2019
241	GCA_024714715.1	respiratory	USA: Texas	2019
242	GCA_024734795.1	swab from tracheostomy tube	Kazakhstan: Almaty	2022
243	GCA_024734815.1	swab from purulent wound	Kazakhstan: Almaty	2022
244	GCA_024829435.1	Unknown	Germany: Frankfurt am Main	2022
245	GCA_024829495.1	Unknown	Germany: Frankfurt am Main	2021
246	GCA_024830635.1	Unknown	Germany: Frankfurt am Main	2022
247	GCA_024921865.2	Tracheal Aspirate/Wash	USA	2022
248	GCA_025147275.3	other	USA	2022
249	GCA_025223375.2	sputum	USA	2022
250	GCA_025399155.1	urine	USA	2021
251	GCA_025603965.1	tracheal aspirate	Russia:Moscow	2019
252	GCA_025716925.1	blood	USA: San Francisco	2021
253	GCA_025780275.1	sputum	China: Ningbo	2021
254	GCA_025780315.1	sputum	China: Ningbo	2021
255	GCA_025780385.1	sputum	China: Ningbo	2021
256	GCA_025780475.1	sputum	China: Ningbo	2021
257	GCA_025780565.1	sputum	China: Ningbo	2021
258	GCA_025780585.1	sputum	China: Ningbo	2021
259	GCA_025780655.1	sputum	China: Ningbo	2021
260	GCA_025780895.1	sputum	China: Ningbo	2021
261	GCA_025780935.1	sputum	China: Ningbo	2021
262	GCA_025790885.1	urine	USA	2019
263	GCA_026059675.2	sputum	USA	2022
264	GCA_026059735.1	urine	USA	2022
265	GCA_026059755.2	urine	USA	2022
266	GCA_026059775.2	urine	USA	2022
267	GCA_026059795.1	tracheal aspirate	USA	2022
268	GCA_026059815.2	sputum	USA	2022
269	GCA_026062015.2	sputum	USA	2022
270	GCA_026069135.2	Wound/Abscess	USA	2022
271	GCA_026178425.3	Rectal swab	USA	2022
272	GCA_026182685.2	Rectal swab	USA	2022
273	GCA_026183715.1	blood	China:Hangzhou	2021
274	GCA_026221095.2	urine	USA	2022
275	GCA_026221295.2	sputum	USA	2022
276	GCA_026303895.1	aspirate	Paraguay	2020
277	GCA_026304295.1	sputum	Albania	2020
278	GCA_026311795.1	blood	France	2020
279	GCA_026312675.1	urine	Germany	2020
280	GCA_026314875.1	urine	Paraguay	2020
281	GCA_026317085.1	sputum	Canada	2020
282	GCA_026317865.1	blood	Canada	2020
283	GCA_026317925.1	sputum	Canada	2020
284	GCA_026318545.1	blood	Czech Republic	2020
285	GCA_026318645.1	urine	Czech Republic	2020
286	GCA_026318685.1	swab (wound)	Czech Republic	2020
287	GCA_026319025.1	swab (wound)	Croatia	2020
288	GCA_026320135.1	sputum	Cyprus	2020
289	GCA_026320335.1	sputum	Cyprus	2020
290	GCA_026320455.1	swab (wound)	Cyprus	2020
291	GCA_026320555.1	biopsy	Cyprus	2020
292	GCA_026321375.1	blood	Croatia	2020
293	GCA_026322055.1	aspirate	Croatia	2020
294	GCA_026322175.1	aspirate	Croatia	2020
295	GCA_026325295.1	secretion	Norway	2020
296	GCA_026325335.1	urine	Norway	2020
297	GCA_026329495.1	aspirate	Lithuania	2020
298	GCA_026329515.1	urine	Lithuania	2020
299	GCA_026329555.1	swab (wound)	Lithuania	2020
300	GCA_026330895.1	swab (superficial and non-surgical)	Italy	2020
301	GCA_026331795.1	aspirate	Hungary	2020
302	GCA_026334335.1	urine	Greenland	2020
303	GCA_026335355.1	swab (wound)	Ghana	2020
304	GCA_026335375.1	swab (wound)	Ghana	2020
305	GCA_026335415.1	swab (wound)	Ghana	2020
306	GCA_026336015.1	swab (wound)	Ghana	2020
307	GCA_026337955.1	urine	France	2020
308	GCA_026338495.1	urine	Lithuania	2020
309	GCA_026340895.1	aspirate	Ecuador	2020
310	GCA_026343695.1	urine	Denmark	2020
311	GCA_026344395.1	blood	Cyprus	2020
312	GCA_026345845.1	sputum	Bulgaria	2020
313	GCA_026349475.1	urine	Thailand	2020
314	GCA_026351235.1	swab (wound)	Spain	2020
315	GCA_026351755.1	sputum	Pakistan	2020
316	GCA_026352315.1	urine	Saudi Arabia	2020
317	GCA_026352715.1	biopsy	Saudi Arabia	2020
318	GCA_026358775.1	urine	Paraguay	2020
319	GCA_026358835.1	swab (superficial and non-surgical)	Paraguay	2020
320	GCA_026358955.1	aspirate	Paraguay	2020
321	GCA_026359075.1	sputum	Paraguay	2020
322	GCA_026359155.1	urine	Paraguay	2020
323	GCA_026359175.1	urine	Paraguay	2020
324	GCA_026359235.1	swab (wound)	Paraguay	2020
325	GCA_026359275.1	sputum	Paraguay	2020
326	GCA_026361395.1	aspirate	Algeria	2020
327	GCA_026361775.1	sputum	Albania	2020
328	GCA_026647455.2	urine	USA	2022
329	GCA_026730595.2	urine	USA	2022
330	GCA_026733275.1	urine	USA	2022
331	GCA_027570415.1	sputum	United Kingdom: London	2020
332	GCA_027570475.1	sputum	United Kingdom: London	2019
333	GCA_027570535.1	sputum	United Kingdom: London	2019
334	GCA_027570595.1	sputum	United Kingdom: London	2020
335	GCA_027570615.1	sputum	United Kingdom: London	2019
336	GCA_027570635.1	sputum	United Kingdom: London	2019
337	GCA_027570655.1	sputum	United Kingdom: London	2019
338	GCA_027570675.1	sputum	United Kingdom: London	2020
339	GCA_027570915.1	sputum	United Kingdom: London	2019
340	GCA_027570935.1	sputum	United Kingdom: London	2019
341	GCA_027570955.1	sputum	United Kingdom: London	2020
342	GCA_027571285.1	sputum	United Kingdom: London	2019
343	GCA_027571325.1	sputum	United Kingdom: London	2019
344	GCA_027571345.1	sputum	United Kingdom: London	2020
345	GCA_027626995.1	sputum	United Kingdom: London	2019
346	GCA_027627015.1	sputum	United Kingdom: London	2019
347	GCA_027627025.1	sputum	United Kingdom: London	2019
348	GCA_027627035.1	Cough Swab	United Kingdom: London	2019
349	GCA_027627125.1	sputum	United Kingdom: London	2020
350	GCA_027627185.1	sputum	United Kingdom: London	2019
351	GCA_027992725.3	other	USA	2022
352	GCA_028053975.4	sputum	USA	2022
353	GCA_028366415.3	Rectal Swab	USA	2023
354	GCA_028366535.3	bronchoalveolar lavage	USA	2022
355	GCA_028567155.1	sputum	USA: ARUP Laboratories, University of Utah	2019
356	GCA_028567175.1	sputum	USA: Loyola University Medical Center	2019
357	GCA_028567275.1	sputum	USA: University of California, San Francisco Medical Center (UCSF)	2019
358	GCA_028567335.1	sputum	USA: Indiana University Health University Hospital	2019
359	GCA_028567355.1	sputum	USA: Indiana University Health University Hospital	2019
360	GCA_028567395.1	sputum	USA: Indiana University Health University Hospital	2019
361	GCA_028567415.1	sputum	USA: Indiana University Health University Hospital	2019
362	GCA_028567535.1	sputum	USA: University of California, San Francisco Medical Center (UCSF)	2019
363	GCA_028567655.1	sputum	USA: ARUP Laboratories, University of Utah	2019
364	GCA_028567695.1	sputum	USA: Loyola University Medical Center	2019
365	GCA_028567705.1	sputum	USA: Washington University School of Medicine	2019
366	GCA_028567735.1	sputum	USA: Washington University School of Medicine	2019
367	GCA_028567775.1	sputum	USA: Washington University School of Medicine	2019
368	GCA_028567785.1	sputum	USA: Washington University School of Medicine	2019
369	GCA_028567835.1	sputum	USA: ARUP Laboratories, University of Utah	2019
370	GCA_028567845.1	sputum	USA: Washington University School of Medicine	2019
371	GCA_028567895.1	sputum	USA: ARUP Laboratories, University of Utah	2019
372	GCA_028567925.1	sputum	USA: Loyola University Medical Center	2019
373	GCA_028567955.1	sputum	USA: Tampa General Hospital in Tampa	2019
374	GCA_028567995.1	sputum	USA: Sacred Heart Hospital	2019
375	GCA_028568115.1	sputum	USA: University of California, San Francisco Medical Center (UCSF)	2019
376	GCA_028568135.1	sputum	USA: University of California, San Francisco Medical Center (UCSF)	2019
377	GCA_028568175.1	sputum	USA: Washington University School of Medicine	2019
378	GCA_028568215.1	sputum	USA: Dayton Childrens Medical Center	2019
379	GCA_028568245.1	sputum	USA: Dayton Childrens Medical Center	2019
380	GCA_028568615.1	sputum	USA: University of California, San Francisco Medical Center (UCSF)	2019
381	GCA_028568735.1	sputum	USA: Washington University School of Medicine	2019
382	GCA_028568835.1	sputum	USA: University of California, San Francisco Medical Center (UCSF)	2019
383	GCA_028568955.1	sputum	USA: Washington University School of Medicine	2019
384	GCA_028568995.1	sputum	USA: Washington University School of Medicine	2019
385	GCA_028569045.1	sputum	USA: Washington University School of Medicine	2019
386	GCA_028569095.1	sputum	USA: Washington University School of Medicine	2019
387	GCA_028569155.1	sputum	USA: Washington University School of Medicine	2019
388	GCA_028569175.1	sputum	USA: Washington University School of Medicine	2019
389	GCA_028569195.1	sputum	USA: Washington University School of Medicine	2019
390	GCA_028569215.1	sputum	USA: Washington University School of Medicine	2019
391	GCA_028569295.1	sputum	USA: Sacred Heart Hospital	2019
392	GCA_028569405.1	sputum	USA: Sacred Heart Hospital	2019
393	GCA_028569575.1	sputum	USA: Sacred Heart Hospital	2019
394	GCA_028569605.1	sputum	USA: Sacred Heart Hospital	2019
395	GCA_028569635.1	sputum	USA: Sacred Heart Hospital	2019
396	GCA_028569655.1	sputum	USA: University of California, San Francisco Medical Center (UCSF)	2019
397	GCA_028593825.1	urine	Russia: Kazan	2020
398	GCA_028594365.1	urine	Russia: Kazan	2020
399	GCA_028595425.1	Urinary catheter	Egypt: Mansoura	2021
400	GCA_028595525.2	Urinary catheter	Egypt: Mansoura	2021
401	GCA_028595615.2	Urinary catheter	Egypt: Mansoura	2021
402	GCA_028595725.1	Urinary catheter	Egypt: Mansoura	2021
403	GCA_028595785.1	Urinary catheter	Egypt: Mansoura	2021
404	GCA_028595865.2	Urinary catheter	Egypt: Mansoura	2021
405	GCA_028595875.1	Urinary catheter	Egypt: Mansoura	2021
406	GCA_028622895.1	blood	USA	2022
407	GCA_028644805.2	urine	USA	2022
408	GCA_028743595.1	Unknown	USA	2021
409	GCA_028804055.1	sputum	United Kingdom	2019
410	GCA_029127245.1	urine	USA	2023
411	GCA_029210305.1	blood	India: Vellore	2020
412	GCA_029422195.2	sputum	USA	2023
413	GCA_029564555.1	lower respiratory tract	China: Shanghai	2019
414	GCA_029568525.1	lower respiratory tract	China: Shanghai	2020
415	GCA_029568615.1	lower respiratory tract	China: Shanghai	2021
416	GCA_029568635.1	lower respiratory tract	China: Shanghai	2019
417	GCA_029568665.1	lower respiratory tract	China: Shanghai	2019
418	GCA_029568705.1	lower respiratory tract	China: Shanghai	2019
419	GCA_029568805.1	lower respiratory tract	China: Shanghai	2020
420	GCA_029568895.1	lower respiratory tract	China: Shanghai	2019
421	GCA_029568915.1	lower respiratory tract	China: Shanghai	2019
422	GCA_029568945.1	lower respiratory tract	China: Shanghai	2020
423	GCA_029568965.1	lower respiratory tract	China: Shanghai	2020
424	GCA_029569555.1	lower respiratory tract	China: Shanghai	2020
425	GCA_029569625.1	lower respiratory tract	China: Shanghai	2021
426	GCA_029569985.1	lower respiratory tract	China: Shanghai	2021
427	GCA_029571245.1	Blood culture	Australia: Geelong	2019
428	GCA_029572565.1	lower respiratory tract	China: Shanghai	2020
429	GCA_029623895.1	blood	Ukraine	2022
430	GCA_029907785.1	sputum	Russia: Moscow	2021
431	GCA_029916825.1	Unknown	not collected	2019
432	GCA_029955995.1	blood	Ecuador: Quito	2022
433	GCA_029961305.1	Wound/Abscess	USA	2021
434	GCA_029961425.1	Wound/Abscess	USA	2021
435	GCA_029961445.1	Wound/Abscess	USA	2021
436	GCA_029961505.1	Wound/Abscess	USA	2021
437	GCA_029961525.1	Wound/Abscess	USA	2020
438	GCA_029961605.1	Wound/Abscess	USA	2021
439	GCA_029961625.1	Wound/Abscess	USA	2022
440	GCA_029961665.1	Wound/Abscess	USA	2021
441	GCA_029962165.1	blood	USA	2022
442	GCA_029962185.1	Wound/Abscess	USA	2022
443	GCA_029980215.1	urine	Egypt	2021
444	GCA_030214305.1	Unknown	USA: Maywood, IL	2021
445	GCA_030235825.1	Blood culture	Nigeria	2020
446	GCA_030283545.1	feces	Australia:Melbourne	2020
447	GCA_030345885.1	Rectal swab	Spain: Barcelona	2022
448	GCA_030413195.1	Unknown	China:Hangzhou	2020
449	GCA_030541805.1	sputum	Russia:Moscow	2019
450	GCA_030738995.1	sputum	China:Jiangsu	2019
451	GCA_030739015.1	sputum	China:Jiangsu	2019
452	GCA_030739035.1	sputum	China:Jiangsu	2019
453	GCA_030739075.1	sputum	China:Jiangsu	2019
454	GCA_030739115.1	sputum	China:Jiangsu	2019
455	GCA_030739125.1	sputum	China:Jiangsu	2019
456	GCA_030739155.1	sputum	China:Jiangsu	2019
457	GCA_030739185.1	sputum	China:Jiangsu	2019
458	GCA_030739255.1	sputum	China:Jiangsu	2019
459	GCA_030739295.1	sputum	China:Jiangsu	2019
460	GCA_030739335.1	sputum	China:Jiangsu	2019
461	GCA_030739355.1	sputum	China:Jiangsu	2019
462	GCA_030739395.1	sputum	China:Jiangsu	2019
463	GCA_030739415.1	sputum	China:Jiangsu	2019
464	GCA_030741955.1	sputum	China:Jiangsu	2019
465	GCA_030741965.1	sputum	China:Jiangsu	2019
466	GCA_030742075.1	sputum	China:Jiangsu	2019
467	GCA_030742085.1	sputum	China:Jiangsu	2019
468	GCA_030742115.1	sputum	China:Jiangsu	2019
469	GCA_030742195.1	sputum	China:Jiangsu	2019
470	GCA_030742205.1	sputum	China:Jiangsu	2019
471	GCA_030742215.1	sputum	China:Jiangsu	2019
472	GCA_030742265.1	sputum	China:Jiangsu	2019
473	GCA_030742275.1	sputum	China:Jiangsu	2020
474	GCA_030742305.1	sputum	China:Jiangsu	2019
475	GCA_030742375.1	urine	China:Jiangsu	2020
476	GCA_030742385.1	sputum	China:Jiangsu	2021
477	GCA_030742435.1	sputum	China:Jiangsu	2020
478	GCA_030742465.1	sputum	China:Jiangsu	2020
479	GCA_030848745.1	blood	Uganda: Kampala	2022
480	GCA_030850475.1	urine	USA: California, Los Angeles County	2023
481	GCA_030851665.1	bronchoalveolar lavage	USA: California, Los Angeles County	2023
482	GCA_030866905.1	sputum	China: Hangzhou	2022
483	GCA_030871245.1	Homo Sapiens clinical	USA: Florida	2023
484	GCA_030871375.1	Homo Sapiens clinical	USA: Florida	2023
485	GCA_030908425.1	pus	China: Henan	2023
486	GCA_030908445.1	sputum	China: Henan	2023
487	GCA_031033205.1	wound	USA	2023
488	GCA_031163485.1	clinical	USA: Wyoming	2022
489	GCA_031163545.1	clinical	USA: Wyoming	2022
490	GCA_031163565.1	clinical	USA: Wyoming	2022
491	GCA_031163685.1	clinical	USA: Wyoming	2022
492	GCA_031164875.1	clinical	USA: Wyoming	2022
493	GCA_031164915.1	clinical	USA: Wyoming	2022
494	GCA_031164975.1	clinical	USA: Wyoming	2022
495	GCA_031164995.1	clinical	USA: Wyoming	2022
496	GCA_031165175.1	clinical	USA: Wyoming	2022
497	GCA_031165195.1	clinical	USA: Wyoming	2022
498	GCA_031165265.1	clinical	USA: Wyoming	2022
499	GCA_031165425.1	clinical	USA: Wyoming	2022
500	GCA_031165505.1	clinical	USA: Wyoming	2022
501	GCA_031166065.1	clinical	USA: Wyoming	2022
502	GCA_031188385.1	clinical	USA: Wyoming	2022
503	GCA_031204265.1	sputum	China:Guangzhou	2021
504	GCA_031205085.1	sputum	China:Guangzhou	2021
505	GCA_031205835.1	sputum	China:Guangzhou	2021
506	GCA_031205955.1	wound	China:Guangzhou	2021
507	GCA_031206075.1	wound	China:Guangzhou	2021
508	GCA_031206165.1	sputum	China:Guangzhou	2021
509	GCA_031206285.1	urine	China:Guangzhou	2021
510	GCA_031206375.1	sputum	China:Guangzhou	2021
511	GCA_031206455.1	urine	China:Guangzhou	2021
512	GCA_031206615.1	sputum	China:Guangzhou	2021
513	GCA_031206655.1	sputum	China:Guangzhou	2021
514	GCA_031206675.1	blood	China:Guangzhou	2021
515	GCA_031206755.1	Alveolar lavage fluid	China:Guangzhou	2021
516	GCA_031206855.1	sputum	China:Guangzhou	2022
517	GCA_031206865.1	sputum	China:Guangzhou	2021
518	GCA_031206875.1	urine	China:Guangzhou	2021
519	GCA_031206985.1	sputum	China:Guangzhou	2021
520	GCA_031207095.1	sputum	China:Guangzhou	2021
521	GCA_031207105.1	wound	China:Guangzhou	2021
522	GCA_031207515.1	Alveolar lavage fluid	China:Guangzhou	2021
523	GCA_031207595.1	sputum	China:Guangzhou	2021
524	GCA_031207675.1	sputum	China:Guangzhou	2021
525	GCA_031207905.1	urine	China:Guangzhou	2022
526	GCA_031208205.1	sputum	China:Guangzhou	2021
527	GCA_031208255.1	urine	China:Guangzhou	2021
528	GCA_031208345.1	sputum	China:Guangzhou	2021
529	GCA_031208515.1	Alveolar lavage fluid	China:Guangzhou	2021
530	GCA_031208525.1	sputum	China:Guangzhou	2021
531	GCA_031208535.1	Alveolar lavage fluid	China:Guangzhou	2021
532	GCA_031208585.1	sputum	China:Guangzhou	2021
533	GCA_031208615.1	sputum	China:Guangzhou	2021
534	GCA_031208635.1	sputum	China:Guangzhou	2021
535	GCA_031209455.1	urine	China:Guangzhou	2021
536	GCA_031210615.1	sputum	China:Guangzhou	2021
537	GCA_031210635.1	sputum	China:Guangzhou	2021
538	GCA_031210785.1	urine	China:Guangzhou	2021
539	GCA_031210825.1	urine	China:Guangzhou	2022
540	GCA_031210885.1	sputum	China:Guangzhou	2022
541	GCA_031210915.1	sputum	China:Guangzhou	2021
542	GCA_031210985.1	sputum	China:Guangzhou	2021
543	GCA_031211065.1	sputum	China:Guangzhou	2021
544	GCA_031211205.1	Alveolar lavage fluid	China:Guangzhou	2021
545	GCA_031237285.1	urine	USA	2023
546	GCA_031247415.1	clinical	Egypt	2020
547	GCA_031309665.1	Homo Sapiens clinical	USA: Florida	2023
548	GCA_031326325.1	sputum	China: Hangzhou	2023
549	GCA_031340055.1	wound	USA	2023
550	GCA_031394635.1	urine	USA	2023
551	GCA_031394715.1	Fluid	USA	2023
552	GCA_031436685.1	blood	Italy	2022
553	GCA_031488955.1	Washing, Bronchial	USA	2022
554	GCA_031488995.1	urine	USA	2022
555	GCA_031629475.1	Blood Culture	India	2021
556	GCA_031657995.1	Wound/Abscess	USA	2023
557	GCA_031658015.1	sputum	USA	2023
558	GCA_031732515.1	sputum	Russia:Moscow	2023
559	GCA_031733275.1	Unknown	China:Beijing	2021
560	GCA_031733315.1	Unknown	China:Beijing	2021
561	GCA_031733355.1	Unknown	China:Beijing	2020
562	GCA_031733415.1	Unknown	China:Beijing	2020
563	GCA_031733575.1	Unknown	China:Beijing	2019
564	GCA_031733735.1	Unknown	China:Beijing	2019
565	GCA_031733835.1	Unknown	China:Beijing	2019
566	GCA_031733875.1	Unknown	China:Beijing	2019
567	GCA_031734515.1	Unknown	China:Beijing	2021
568	GCA_031787915.1	Homo Sapiens clinical	USA: Florida	2023
569	GCA_031788025.1	Homo Sapiens clinical	USA: Florida	2023
570	GCA_031797055.1	Homo Sapiens clinical	USA: Florida	2023
571	GCA_031823195.1	wound	Bulgaria:Sofia	2019
572	GCA_031823555.1	tracheal aspirate	Bulgaria:Pleven	2019
573	GCA_031823595.1	sputum	Bulgaria:Sofia	2019
574	GCA_031824255.1	Unknown	Japan:Hokkaido	2020
575	GCA_031836335.1	urine	USA	2023
576	GCA_031840475.1	urine	USA	2023
577	GCA_031840525.1	aspirate	USA	2023
578	GCA_031879975.1	clinical	USA: Wyoming	2023
579	GCA_031880015.1	clinical	USA: Wyoming	2023
580	GCA_031881095.1	urine	USA	2023
581	GCA_031918885.1	other	USA	2023
582	GCA_031926345.1	wound	USA	2023
583	GCA_032103045.1	Homo Sapiens clinical	USA: Florida	2023
584	GCA_032163825.1	Urine/Catheter	USA: Virginia	2019
585	GCA_032163845.1	Lung/Trachea	USA: Virginia	2019
586	GCA_032163945.1	ENT/Sinus	USA: Virginia	2019
587	GCA_032163985.1	Lung/Trachea	USA: Virginia	2019
588	GCA_032164005.1	Lung/Trachea	USA: Virginia	2019
589	GCA_032164085.1	Lung/Trachea	USA: Virginia	2019
590	GCA_032164105.1	blood	USA: Virginia	2019
591	GCA_032165445.1	Urine/Catheter	USA: Virginia	2019
592	GCA_032185005.1	wound	USA	2023
593	GCA_032236415.1	clinical	USA: Wyoming	2023
594	GCA_032236495.1	clinical	USA: Wyoming	2023
595	GCA_032236535.1	clinical	USA: Wyoming	2023
596	GCA_032251935.1	bronchoalveolar lavage	USA: California, Los Angeles County	2023
597	GCA_032252255.1	urine	USA: California, Los Angeles County	2023
598	GCA_032252495.1	urine	USA: California, Los Angeles County	2023
599	GCA_032252955.1	sputum	China	2022
600	GCA_032252975.1	sputum	China	2022
601	GCA_032256525.1	Unknown	Russia	2021
602	GCA_032258305.1	Unknown	Russia	2021
603	GCA_032258985.1	Unknown	Russia	2021
604	GCA_032297035.1	Homo Sapiens clinical	USA: Florida	2023
605	GCA_032320675.1	Homo Sapiens clinical	USA: Florida	2022
606	GCA_032320725.1	Homo Sapiens clinical	USA: Florida	2022
607	GCA_032320775.1	Homo Sapiens clinical	USA: Florida	2022
608	GCA_032320795.1	Homo Sapiens clinical	USA: Florida	2022
609	GCA_032320815.1	Homo Sapiens clinical	USA: Florida	2022
610	GCA_032320855.1	Homo Sapiens clinical	USA: Florida	2022
611	GCA_032320875.1	Homo Sapiens clinical	USA: Florida	2022
612	GCA_032320995.1	Homo Sapiens clinical	USA: Florida	2022
613	GCA_032321095.1	Homo Sapiens clinical	USA: Florida	2022
614	GCA_032321115.1	Homo Sapiens clinical	USA: Florida	2022
615	GCA_032321135.1	Homo Sapiens clinical	USA: Florida	2022
616	GCA_032321155.1	Homo Sapiens clinical	USA: Florida	2022
617	GCA_032321175.1	Homo Sapiens clinical	USA: Florida	2022
618	GCA_032321195.1	Homo Sapiens clinical	USA: Florida	2022
619	GCA_032332855.1	urine	USA	2023
620	GCA_032354835.1	Homo Sapiens clinical	USA: Florida	2023
621	GCA_032360365.1	Homo Sapiens clinical	USA: Florida	2023
622	GCA_032360405.1	Homo Sapiens clinical	USA: Florida	2023
623	GCA_032360565.1	Homo Sapiens clinical	USA: Florida	2023
624	GCA_032360605.1	Homo Sapiens clinical	USA: Florida	2023
625	GCA_032368685.1	Homo Sapiens clinical	USA: Florida	2023
626	GCA_032390095.1	clinical	USA: Florida	2023
627	GCA_032390135.1	clinical	USA: Florida	2023
628	GCA_032390155.1	clinical	USA: Florida	2023
629	GCA_032390215.1	clinical	USA: Florida	2023
630	GCA_032497665.1	Homo Sapiens clinical	USA: Florida	2023
631	GCA_032497745.1	Homo Sapiens clinical	USA: Florida	2023
632	GCA_032497805.1	Homo Sapiens clinical	USA: Florida	2023
633	GCA_032497845.1	Homo Sapiens clinical	USA: Florida	2023
634	GCA_032529145.1	AL-Ramadi Teaching Hospital	Iraq	2020
635	GCA_032529205.1	AL-Ramadi Teaching Hospital	Iraq	2020
636	GCA_032579075.1	skin	USA	2023
637	GCA_032634425.1	sputum	USA	2023
638	GCA_032643565.1	Urine/Catheter	USA: Virginia	2019
639	GCA_032654355.1	urine	USA	2023
640	GCA_032734565.1	urine	USA	2023
641	GCA_032760995.1	Homo Sapiens clinical	USA: Florida	2023
642	GCA_032761935.1	throat swab	China:Taizhou	2022
643	GCA_032822915.1	other	USA	2023
644	GCA_032822935.1	Tissue	USA	2023
645	GCA_032841715.1	blood	Italy: Bari	2023
646	GCA_032843285.1	Respiratory sample	Italy: Foggia	2022
647	GCA_032843325.1	blood	Italy: Lecce	2023
648	GCA_032843345.1	Respiratory sample	Italy: Potenza	2023
649	GCA_032843385.1	Respiratory sample	Italy: Lecce	2022
650	GCA_032843465.1	blood	Italy: Bari	2023
651	GCA_032843585.1	Respiratory sample	Italy: Bari	2023
652	GCA_032843745.1	Respiratory sample	Italy: Potenza	2022
653	GCA_032843945.1	Respiratory sample	Italy: Bari	2022
654	GCA_032844025.1	Urinary sample	Italy: Bari	2023
655	GCA_032864995.1	urine	USA	2022
656	GCA_032865095.1	urine	USA	2022
657	GCA_032865835.1	Abscess	USA	2021
658	GCA_032869565.1	other	USA	2023
659	GCA_032934835.1	Wound/Abscess	USA	2020
660	GCA_032979645.1	urine	USA	2022
661	GCA_032997485.1	urine	USA	2021
662	GCA_032997545.1	blood	USA	2021
663	GCA_033079145.1	clinical	USA: Wyoming	2023
664	GCA_033144895.1	clinical	USA: Wyoming	2023
665	GCA_033219075.1	Unknown	South Korea	2022
666	GCA_033219955.1	Unknown	South Korea	2022
667	GCA_033223225.1	Unknown	South Korea	2021
668	GCA_033228545.1	Unknown	South Korea	2021
669	GCA_033229485.1	Unknown	South Korea	2021
670	GCA_033230305.1	Unknown	South Korea	2021
671	GCA_033239025.1	wound	USA	2023
672	GCA_033605555.1	sputum	USA	2023
673	GCA_033655205.1	sputum	China: Shanghai	2020
674	GCA_033655225.1	sputum	China: Shanghai	2020
675	GCA_033655265.1	sputum	China: Shanghai	2019
676	GCA_033655525.1	sputum	China: Shanghai	2019
677	GCA_033655585.1	sputum	China: Shanghai	2020
678	GCA_033656725.1	sputum	China: Shanghai	2020
679	GCA_033656905.1	sputum	China: Shanghai	2019
680	GCA_033660405.1	sputum	China: Shanghai	2020
681	GCA_033662905.1	sputum	China: Shanghai	2019
682	GCA_033677845.1	sputum	China: Shanghai	2020
683	GCA_033677905.1	sputum	China: Shanghai	2019
684	GCA_033691515.1	sputum	Canada:Toronto	2020
685	GCA_033691595.1	sputum	Canada:Toronto	2020
686	GCA_033691655.1	tracheal aspirate samples	France: Lille	2021
687	GCA_033796495.1	Drainage	China:Shanghai Ruijin Hospital	2021
688	GCA_033796545.1	Puncture fluid	China:Shanghai Ruijin Hospital	2021
689	GCA_033796665.1	Drainage	China:Shanghai Ruijin Hospital	2021
690	GCA_033796675.1	Effusion	China:Shanghai Ruijin Hospital	2021
691	GCA_033796705.1	Effusion	China:Shanghai Ruijin Hospital	2021
692	GCA_033796765.1	Drainage	China:Shanghai Ruijin Hospital	2021
693	GCA_033796825.1	Drainage	China:Shanghai Ruijin Hospital	2021
694	GCA_033796865.1	Wound surface	China:Shanghai Ruijin Hospital	2021
695	GCA_033796885.1	Drainage	China:Shanghai Ruijin Hospital	2021
696	GCA_033796905.1	Midstream urine	China:Shanghai Ruijin Hospital	2021
697	GCA_033796925.1	sputum	China:Shanghai Ruijin Hospital	2021
698	GCA_033796945.1	sputum	China:Shanghai Ruijin Hospital	2021
699	GCA_033796965.1	sputum	China:Shanghai Ruijin Hospital	2021
700	GCA_033797025.1	sputum	China:Shanghai Ruijin Hospital	2021
701	GCA_033797035.1	sputum	China:Shanghai Ruijin Hospital	2021
702	GCA_033797075.1	sputum	China:Shanghai Ruijin Hospital	2021
703	GCA_033797155.1	sputum	China:Shanghai Ruijin Hospital	2021
704	GCA_033797225.1	sputum	China:Shanghai Ruijin Hospital	2021
705	GCA_033797375.1	sputum	China:Shanghai Ruijin Hospital	2021
706	GCA_033797395.1	sputum	China:Shanghai Ruijin Hospital	2021
707	GCA_033797555.1	Ascites	China:Shanghai Renji Hospital	2021
708	GCA_033797595.1	sputum	China:Shanghai Ruijin Hospital	2021
709	GCA_033797615.1	sputum	China:Shanghai Renji Hospital	2021
710	GCA_033797695.1	throat swab	China:Shanghai Renji Hospital	2021
711	GCA_033797745.1	sputum	China:Shanghai Renji Hospital	2021
712	GCA_033797765.1	sputum	China:Shanghai Renji Hospital	2021
713	GCA_033797785.1	throat swab	China:Shanghai Renji Hospital	2021
714	GCA_033797945.1	sputum	China:Shanghai Renji Hospital	2021
715	GCA_033798005.1	bile	China:Shanghai Ruijin Hospital	2021
716	GCA_033798015.1	throat swab	China:Shanghai Ruijin Hospital	2021
717	GCA_033798085.1	Secretion	China:Shanghai Ruijin Hospital	2021
718	GCA_033798105.1	Effusion	China:Shanghai Ruijin Hospital	2021
719	GCA_033798145.1	Drainage	China:Shanghai Ruijin Hospital	2021
720	GCA_033798165.1	Secretion	China:Shanghai Ruijin Hospital	2021
721	GCA_033798225.1	Drainage	China:Shanghai Ruijin Hospital	2021
722	GCA_033798245.1	Secretion	China:Shanghai Ruijin Hospital	2021
723	GCA_033798265.1	sputum	China:Shanghai Ruijin Hospital	2021
724	GCA_033798305.1	Deep-venous catheter	China:Shanghai Ruijin Hospital	2021
725	GCA_033798325.1	Pus	China:Shanghai Ruijin Hospital	2021
726	GCA_033798365.1	Wound surface	China:Shanghai Ruijin Hospital	2021
727	GCA_033798385.1	sputum	China:Shanghai Ruijin Hospital	2021
728	GCA_033978665.1	Homo Sapiens clinical	USA: Florida	2023
729	GCA_034127035.1	urine	USA	2023
730	GCA_034258885.1	sputum	USA: California, Los Angeles County	2023
731	GCA_034318405.1	perirectal swab	USA: California, Los Angeles County	2023
732	GCA_034318885.1	urine	USA: California, Los Angeles County	2023
733	GCA_951691365.2	blood	Bulgaria	2022
734	GCA_951805275.2	urine	Bulgaria	2019
735	S1_R9	Sputum	India	2019
736	S10_R12	Pus	India	2020
737	S10_R9	Urine	India	2020
738	S11_R12	Urine	India	2020
739	S11_R9	Urine from DJ Stent	India	2020
740	S12_R12	Pus	India	2020
741	S12_R9	Tissue	India	2020
742	S13_R10	Pus	India	2020
743	S13_R12	Urine	India	2020
744	S13_R9	Pus	India	2020
745	S14_R9	Urine from DJ Stent	India	2020
746	S15_R10	Urine	India	2020
747	S15_R9	Urine from DJ Stent	India	2020
748	S16_R10	Urine	India	2020
749	S18_R8	Pus	India	2020
750	S19_R8	Urine	India	2020
751	S2_R11	Urine	India	2020
752	S2_R9	Urine	India	2019
753	S20_R8	Urine	India	2020
754	S21_R10	Pus	India	2020
755	S21_R8	Blood	India	2020
756	S22_R12	Urine	India	2021
757	S22_R8	Pus	India	2020
758	S23_R8	CSF	India	2020
759	S24_R12	Urine	India	2021
760	S25_R8	Bile	India	2019
761	S38_R7	Tissue	India	2019
762	S39_R7	Tissue	India	2019
763	S4_R10	Pus	India	2020
764	S5_R10	Tissue	India	2020
765	S5_R12	E.T Tube aspirate	India	2020
766	S5_R9	Urine	India	2020
767	S6_R12	Urine from DJ Stent	India	2020
768	S6_R9	Bile	India	2019
769	S7_R10	Urine	India	2020
770	S7_R12	Urine from DJ Stent	India	2020
771	S8_R10	Urine	India	2020
772	S8_R12	Urine from DJ Stent	India	2020
773	S9_R10	Tissue	India	2020
774	S9_R12	Tissue	India	2020

## Sheet:  S7f
Table S7f: Metadata of clinical E. faecium isolates from NCBI database
S. No.	Assembly	Sample source	Location	Year of collection
1	GCA_005576735.1	Pus	India	2019
2	GCA_006337045.1	feces	South Korea	2019
3	GCA_008868365.1	Unknown	Unknown	2019
4	GCA_012933105.1	blood	India:Vellore	2019
5	GCA_012933165.2	blood	India:Vellore	2019
6	GCA_012933195.2	blood	India:Vellore	2019
7	GCA_012933295.2	blood	India:Vellore	2019
8	GCA_012933345.2	blood	India:Vellore	2019
9	GCA_015705355.1	blood	USA: Pittsburgh, Pennsylvania	2019
10	GCA_015705425.1	rectal swab	USA: Pittsburgh, Pennsylvania	2019
11	GCA_015705435.1	urine	USA: Pittsburgh, Pennsylvania	2019
12	GCA_015705475.1	rectal swab	USA: Pittsburgh, Pennsylvania	2019
13	GCA_015705495.1	rectal swab	USA: Pittsburgh, Pennsylvania	2019
14	GCA_015705545.1	blood	USA: Pittsburgh, Pennsylvania	2019
15	GCA_015705565.1	not collected	USA: Pittsburgh, Pennsylvania	2019
16	GCA_016392865.1	blood	USA: Pittsburgh, Pennsylvania	2019
17	GCA_016392965.1	wound	USA: Pittsburgh, Pennsylvania	2019
18	GCA_016392985.1	wound	USA: Pittsburgh, Pennsylvania	2019
19	GCA_016393025.1	tissue	USA: Pittsburgh, Pennsylvania	2019
20	GCA_016393445.1	urine	USA: Pittsburgh, Pennsylvania	2019
21	GCA_016393465.1	urine	USA: Pittsburgh, Pennsylvania	2019
22	GCA_016400025.1	tissue	USA: Pittsburgh, Pennsylvania	2019
23	GCA_016400185.1	urine	USA: Pittsburgh, Pennsylvania	2019
24	GCA_016400205.1	wound	USA: Pittsburgh, Pennsylvania	2019
25	GCA_016400265.1	blood	USA: Pittsburgh, Pennsylvania	2019
26	GCA_016400345.1	wound	USA: Pittsburgh, Pennsylvania	2019
27	GCA_016400365.1	urine	USA: Pittsburgh, Pennsylvania	2019
28	GCA_016400425.1	wound	USA: Pittsburgh, Pennsylvania	2019
29	GCA_016400465.1	urine	USA: Pittsburgh, Pennsylvania	2019
30	GCA_016400545.1	urine	USA: Pittsburgh, Pennsylvania	2019
31	GCA_016400665.1	urine	USA: Pittsburgh, Pennsylvania	2019
32	GCA_016400705.1	urine	USA: Pittsburgh, Pennsylvania	2019
33	GCA_016400805.1	wound	USA: Pittsburgh, Pennsylvania	2019
34	GCA_016847725.1	human	Belgium	2019
35	GCA_016978335.1	Rectal screening, admission abroad	Denmark:Copenhagen	2019
36	GCA_016979035.1	Rectal screening, admission abroad	Denmark:Copenhagen	2019
37	GCA_016982195.1	Rectal screening	Denmark:Copenhagen	2019
38	GCA_017603725.1	blood	India	2020
39	GCA_017691435.1	rectal swab	Denmark:Copenhagen	2019
40	GCA_017692095.1	urine	Denmark:Copenhagen	2019
41	GCA_017692115.1	intraabdominal pus	Denmark:Copenhagen	2019
42	GCA_017692455.1	rectal swab	Denmark:Copenhagen	2019
43	GCA_017692475.1	rectal swab	Denmark:Copenhagen	2019
44	GCA_017692615.1	rectal swab	Denmark:Copenhagen	2019
45	GCA_017692655.1	rectal swab	Denmark:Copenhagen	2019
46	GCA_017692675.1	rectal swab	Denmark:Copenhagen	2019
47	GCA_017692895.1	rectal swab	Denmark:Copenhagen	2019
48	GCA_017693295.1	rectal swab	Denmark:Copenhagen	2019
49	GCA_017694395.1	rectal swab	Denmark:Copenhagen	2019
50	GCA_017694635.1	rectal swab	Denmark:Copenhagen	2019
51	GCA_017696155.1	rectal swab	Denmark:Copenhagen	2019
52	GCA_017696225.1	rectal swab	Denmark:Copenhagen	2019
53	GCA_017700315.1	rectal swab	Denmark:Copenhagen	2019
54	GCA_017700895.1	rectal swab	Denmark:Copenhagen	2019
55	GCA_017701035.1	rectal swab	Denmark:Copenhagen	2020
56	GCA_017701335.1	rectal swab	Denmark:Copenhagen	2020
57	GCA_017702535.1	rectal swab	Denmark:Copenhagen	2019
58	GCA_017716235.1	Wound swab	India: Puducherry	2019
59	GCA_017716255.1	urine	India: Puducherry	2019
60	GCA_017754065.1	rectal swab	Denmark:Copenhagen	2019
61	GCA_017815695.1	blood	India	2019
62	GCA_017966085.1	clinical sample	Switzerland	2019
63	GCA_019731045.1	feces	China	2020
64	GCA_019731315.1	feces	China	2020
65	GCA_019733855.1	feces	China	2020
66	GCA_019733965.1	feces	China	2020
67	GCA_019734135.1	feces	China	2020
68	GCA_019780085.1	Unknown	China:Beijing	2019
69	GCA_019780125.1	Unknown	China	2019
70	GCA_019780135.1	Unknown	China	2019
71	GCA_019780165.1	Unknown	China:Beijing	2019
72	GCA_019780175.1	Unknown	China	2019
73	GCA_019780205.1	Unknown	China	2019
74	GCA_019780225.1	Unknown	China	2019
75	GCA_019780245.1	Unknown	China	2019
76	GCA_019780255.1	Unknown	China	2019
77	GCA_019780285.1	Unknown	China	2019
78	GCA_019780295.1	Unknown	China	2019
79	GCA_019780325.1	Unknown	China	2019
80	GCA_019780345.1	Unknown	China	2019
81	GCA_019780385.1	Unknown	China	2019
82	GCA_019780395.1	Unknown	China	2019
83	GCA_019780465.1	Unknown	China	2019
84	GCA_019780485.1	Unknown	China	2019
85	GCA_019780585.1	Unknown	China	2019
86	GCA_019880125.1	urine	Belgium	2021
87	GCA_019973595.1	Unknown	Iran	2019
88	GCA_020221735.2	hematoma	Poland: Bydgoszcz	2020
89	GCA_020405555.1	genitourinary system	Russia: Moscow region	2020
90	GCA_020405705.1	digestive system	Russia: Moscow	2020
91	GCA_020406035.1	genitourinary system	Russia: Moscow region	2020
92	GCA_020658235.1	blood	USA: Boston	2019
93	GCA_020662505.1	blood	USA: Boston	2019
94	GCA_020744955.1	blood	USA: Boston	2019
95	GCA_020745155.1	wound, pelvis	USA: Boston	2019
96	GCA_020745515.1	bone,toe	USA: Boston	2019
97	GCA_020745575.1	blood	USA: Boston	2019
98	GCA_020745615.1	bile	USA: Boston	2019
99	GCA_020750325.1	rectal	USA: Boston	2019
100	GCA_020750425.1	aspirate, pancreatic tail	USA: Boston	2019
101	GCA_020750505.1	abscess, midline surgical incision	USA: Boston	2019
102	GCA_020750545.1	pleural fluid	USA: Boston	2019
103	GCA_020750605.1	tissue, groin	USA: Boston	2019
104	GCA_020750805.1	urine	USA: Boston	2019
105	GCA_020750895.1	abscess	USA: Boston	2019
106	GCA_020750915.1	blood	USA: Boston	2019
107	GCA_020751065.1	abdominal	USA: Boston	2019
108	GCA_020751135.1	abdominal	USA: Boston	2019
109	GCA_020791715.1	urine	Denmark:Copenhagen	2019
110	GCA_020792065.1	Rectum	Denmark:Copenhagen	2019
111	GCA_020923935.1	Perirectal Swab	USA: Ann Arbor, Michigan	2019
112	GCA_020924035.1	Perirectal Swab	USA: Ann Arbor, Michigan	2019
113	GCA_020924165.1	Perirectal Swab	USA: Ann Arbor, Michigan	2019
114	GCA_020934605.1	Perirectal Swab	USA: Ann Arbor, Michigan	2019
115	GCA_020934845.1	Perirectal Swab	USA: Ann Arbor, Michigan	2019
116	GCA_020934965.1	Perirectal Swab	USA: Ann Arbor, Michigan	2019
117	GCA_020936205.1	Perirectal Swab	USA: Ann Arbor, Michigan	2019
118	GCA_020936245.1	Perirectal Swab	USA: Ann Arbor, Michigan	2019
119	GCA_020936665.1	Perirectal Swab	USA: Ann Arbor, Michigan	2020
120	GCA_020938365.1	Perirectal Swab	USA: Ann Arbor, Michigan	2020
121	GCA_020938385.1	Perirectal Swab	USA: Ann Arbor, Michigan	2020
122	GCA_020938425.1	Perirectal Swab	USA: Ann Arbor, Michigan	2020
123	GCA_020938505.1	Perirectal Swab	USA: Ann Arbor, Michigan	2020
124	GCA_020938545.1	Perirectal Swab	USA: Ann Arbor, Michigan	2020
125	GCA_020942285.1	Blood Culture	USA: Ann Arbor, Michigan	2019
126	GCA_020942825.1	Blood Culture	USA: Ann Arbor, Michigan	2019
127	GCA_020943085.1	Blood Culture	USA: Ann Arbor, Michigan	2019
128	GCA_021228615.1	blood	USA: Chicago, Illinois	2021
129	GCA_021245085.1	Unknown	Australia	2021
130	GCA_021245285.1	Unknown	Australia	2021
131	GCA_021245485.1	Unknown	Australia	2021
132	GCA_021246505.1	Unknown	Australia	2021
133	GCA_021246545.1	Unknown	Australia	2021
134	GCA_021247265.1	Unknown	Australia	2021
135	GCA_021248145.1	Unknown	Australia	2021
136	GCA_021248765.1	Unknown	Australia	2021
137	GCA_021311275.1	Rectal swab	Reunion: Saint-Denis	2019
138	GCA_021311395.1	Rectal swab	Reunion: Saint-Denis	2019
139	GCA_021317955.1	human	Ireland: Dublin	2019
140	GCA_021318075.1	human	Ireland: Dublin	2019
141	GCA_021318155.1	human	Ireland: West	2019
142	GCA_021318315.1	human	Ireland: Dublin	2019
143	GCA_021318355.1	human	Ireland: Dublin	2019
144	GCA_021318535.1	human	Ireland: Dublin	2019
145	GCA_021318735.1	human	Ireland: Dublin	2019
146	GCA_021319135.1	human	Ireland: Dublin	2019
147	GCA_021319275.1	human	Ireland: Dublin	2019
148	GCA_021319295.1	human	Ireland: Dublin	2019
149	GCA_021319415.1	human	Ireland: Dublin	2019
150	GCA_021321615.1	human	Ireland: Dublin	2019
151	GCA_021321835.1	human	Ireland: Dublin	2019
152	GCA_021322075.1	human	Ireland: West	2019
153	GCA_021322135.1	human	Ireland: West	2019
154	GCA_021322215.1	human	Ireland: Dublin	2019
155	GCA_021322275.1	human	Ireland: West	2019
156	GCA_021322535.1	human	Ireland: West	2019
157	GCA_021322915.1	human	Ireland: Dublin	2019
158	GCA_021322935.1	human	Ireland: Dublin	2019
159	GCA_021323035.1	human	Ireland: Dublin	2019
160	GCA_021323135.1	human	Ireland: Dublin	2019
161	GCA_021326115.1	human	Ireland: Dublin	2019
162	GCA_021326135.1	human	Ireland: Dublin	2019
163	GCA_021326545.1	human	Ireland: Dublin	2019
164	GCA_021326805.1	human	Ireland: Dublin	2019
165	GCA_021329875.1	human	Ireland: Dublin	2019
166	GCA_021330195.1	human	Ireland: Dublin	2019
167	GCA_021330835.1	human	Ireland: Dublin	2019
168	GCA_021330855.1	human	Ireland: Dublin	2019
169	GCA_021331595.1	human	Ireland: Dublin	2019
170	GCA_021332055.1	human	Ireland: Dublin	2019
171	GCA_021332215.1	human	Ireland: Dublin	2019
172	GCA_021332315.1	human	Ireland: Dublin	2019
173	GCA_021332395.1	human	Ireland: Dublin	2019
174	GCA_021332435.1	human	Ireland: Dublin	2019
175	GCA_021332735.1	human	Ireland: Dublin	2019
176	GCA_021333055.1	human	Ireland: Dublin	2019
177	GCA_021333335.1	human	Ireland: West	2019
178	GCA_021333515.1	human	Ireland: West	2019
179	GCA_021333695.1	human	Ireland: West	2019
180	GCA_021333775.1	human	Ireland: West	2019
181	GCA_021333815.1	human	Ireland: Dublin	2019
182	GCA_021334295.1	human	Ireland: Dublin	2019
183	GCA_021334755.1	human	Ireland: Dublin	2019
184	GCA_021334915.1	human	Ireland: Dublin	2019
185	GCA_021335035.1	human	Ireland: Dublin	2019
186	GCA_021335395.1	human	Ireland: Dublin	2019
187	GCA_021335635.1	human	Ireland: Dublin	2019
188	GCA_021335835.1	human	Ireland: West	2019
189	GCA_021335995.1	human	Ireland: West	2019
190	GCA_021336055.1	human	Ireland: West	2019
191	GCA_021336095.1	human	Ireland: West	2019
192	GCA_021338395.1	human	Ireland: Dublin	2019
193	GCA_021340295.1	human	Ireland: West	2019
194	GCA_021738845.1	blood	Ireland: Dublin	2019
195	GCA_021739075.1	blood	Ireland: Dublin	2019
196	GCA_021739145.1	blood	Ireland: Dublin	2019
197	GCA_021739205.1	blood	Ireland: Dublin	2019
198	GCA_021739225.1	blood	Ireland: Dublin	2019
199	GCA_021739255.1	blood	Ireland: Dublin	2019
200	GCA_021739325.1	blood	Ireland: Dublin	2019
201	GCA_021739385.1	blood	Ireland: Dublin	2019
202	GCA_021739425.1	blood	Ireland: Dublin	2019
203	GCA_021760925.1	Unknown	Japan:Aomori	2021
204	GCA_021761325.1	Unknown	Japan:Aomori	2019
205	GCA_022046525.1	Rectal swab	Australia: Brisbane	2019
206	GCA_022046545.1	Rectal swab	Australia: Brisbane	2019
207	GCA_022046605.1	Rectal swab	Australia: Brisbane	2019
208	GCA_022046625.1	Rectal swab	Australia: Brisbane	2019
209	GCA_022046645.1	Rectal swab	Australia: Brisbane	2019
210	GCA_022046865.1	Rectal swab	Australia: Brisbane	2019
211	GCA_022463075.1	blood	Israel: Jerusalem	2020
212	GCA_022463085.1	blood	Israel: Jerusalem	2020
213	GCA_022463235.1	blood	Israel: Jerusalem	2020
214	GCA_022463275.1	blood	Israel: Jerusalem	2020
215	GCA_022463295.1	blood	Israel: Jerusalem	2019
216	GCA_022463335.1	blood	Israel: Jerusalem	2019
217	GCA_022647825.1	blood	USA:Little Rock	2019
218	GCA_022809255.1	urine	USA: Hawaii	2021
219	GCA_022811165.1	rectal swab	Germany: Hamburg	2019
220	GCA_022811205.1	rectal swab	Germany: Hamburg	2019
221	GCA_022811445.1	rectal swab	Germany: Hamburg	2019
222	GCA_022811465.1	rectal swab	Germany: Hamburg	2019
223	GCA_022845095.1	rectal swab	Germany: Heidelberg	2019
224	GCA_022845215.1	rectal swab	Germany: Heidelberg	2019
225	GCA_022845455.1	rectal swab	Germany: Heidelberg	2019
226	GCA_023059395.1	blood	Brazil	2019
227	GCA_023060575.1	blood	Brazil	2019
228	GCA_023204955.1	blood	USA	2019
229	GCA_023204975.1	blood	USA	2019
230	GCA_023375345.1	fecal sample	Unknown	2021
231	GCA_023375365.1	fecal sample	Unknown	2021
232	GCA_023375385.1	fecal sample	Unknown	2021
233	GCA_023375405.1	fecal sample	Unknown	2021
234	GCA_023375445.1	fecal sample	Unknown	2021
235	GCA_023581265.1	Rectal Swab	Australia:Queensland	2019
236	GCA_023583365.1	Rectal Swab	Australia:Queensland	2019
237	GCA_023587045.1	Rectal Swab	Australia:Queensland	2019
238	GCA_023589045.1	Rectal Swab	Australia:Queensland	2019
239	GCA_023591065.1	Rectal Swab	Australia:Queensland	2019
240	GCA_023592385.1	Rectal Swab	Australia:Queensland	2019
241	GCA_023594245.1	Rectal Swab	Australia:Queensland	2019
242	GCA_023594565.1	Rectal Swab	Australia:Queensland	2019
243	GCA_023595225.1	Rectal Swab	Australia:Queensland	2019
244	GCA_023596285.1	Rectal Swab	Australia:Queensland	2019
245	GCA_023596325.1	Rectal Swab	Australia:Queensland	2019
246	GCA_023597445.1	Rectal Swab	Australia:Queensland	2019
247	GCA_023599645.1	Rectal Swab	Australia:Queensland	2019
248	GCA_023601145.1	Rectal Swab	Australia:Queensland	2019
249	GCA_023601645.1	Rectum Swab	Australia:Queensland	2019
250	GCA_023602825.1	Rectal Swab	Australia:Queensland	2019
251	GCA_023603505.1	Rectal Swab	Australia:Queensland	2019
252	GCA_023603845.1	Rectal Swab	Australia:Queensland	2019
253	GCA_023611205.1	Rectal Swab	Australia:Queensland	2019
254	GCA_023613235.1	Rectum Swab	Australia:Queensland	2019
255	GCA_023613575.1	Abdominal Mesh	Australia:Queensland	2019
256	GCA_023613915.1	Rectal Swab	Australia:Queensland	2019
257	GCA_023616505.1	Rectal Swab	Australia:Queensland	2019
258	GCA_023616625.1	Rectal Swab	Australia:Queensland	2019
259	GCA_023616905.1	Rectal Swab	Australia:Queensland	2019
260	GCA_023671605.1	urine	Australia:Queensland	2020
261	GCA_023671965.1	blood	Australia:Queensland	2019
262	GCA_023671985.1	blood	Australia:Queensland	2019
263	GCA_023679575.1	blood	Australia:Queensland	2019
264	GCA_023686125.1	blood	Australia:Queensland	2019
265	GCA_023690565.1	Perianal Swab	Australia:Queensland	2021
266	GCA_024311455.1	Unknown	Unknown	2021
267	GCA_024311835.1	Unknown	Unknown	2019
268	GCA_024312315.1	Unknown	Unknown	2020
269	GCA_024312395.1	Unknown	Unknown	2019
270	GCA_024313815.1	Unknown	Unknown	2021
271	GCA_024314835.1	Unknown	Unknown	2021
272	GCA_024315675.1	Unknown	Unknown	2020
273	GCA_024315935.1	Unknown	Unknown	2020
274	GCA_024316055.1	Unknown	Unknown	2019
275	GCA_024317115.1	Unknown	Unknown	2021
276	GCA_024318675.1	Unknown	Unknown	2019
277	GCA_024773685.1	Unknown	Germany: Baden Wurttemberg	2019
278	GCA_024776825.1	Unknown	Germany: Baden Wurttemberg	2019
279	GCA_024787085.1	Unknown	Germany: Baden Wurttemberg	2019
280	GCA_024794105.1	Unknown	Germany: Baden Wurttemberg	2019
281	GCA_024794405.1	Unknown	Germany: Baden Wurttemberg	2019
282	GCA_024812055.1	Unknown	Germany: Baden Wurttemberg	2019
283	GCA_024813075.1	Unknown	Germany: Baden Wurttemberg	2019
284	GCA_024823675.1	Unknown	Germany: Baden Wurttemberg	2019
285	GCA_024823975.1	Unknown	Germany: Baden Wurttemberg	2019
286	GCA_025476455.1	feces	France: Muret	2020
287	GCA_025476595.1	feces	France: Cabestany	2020
288	GCA_025476655.1	feces	France: Gonesse	2020
289	GCA_025476665.1	urine	France: Argenteuil	2020
290	GCA_025476715.1	feces	France: Suresnes	2020
291	GCA_025476815.1	urine	France: Colmar	2020
292	GCA_025476825.1	feces	France: Muret	2020
293	GCA_025476855.1	urine	France: Paris	2020
294	GCA_025476915.1	feces	France: Strasbourg	2020
295	GCA_025476955.1	feces	France: Cholet	2020
296	GCA_025477015.1	Unknow	France: Montpellier	2019
297	GCA_025477065.1	bone	France: Bordeaux	2020
298	GCA_025477085.1	urine	France: Pau	2020
299	GCA_025477155.1	feces	France: Coquelles	2020
300	GCA_025477235.1	feces	France: Saint-Jean d'Angely	2020
301	GCA_025477275.1	feces	France: Lyon	2020
302	GCA_025477335.1	Pus	France: Lyon	2019
303	GCA_025477345.1	Unknow	France: Belfort	2019
304	GCA_025477515.1	feces	France: Paris	2019
305	GCA_025477535.1	feces	France: Tarbes	2019
306	GCA_025477555.1	Unknow	France: Saint-Martin d'Heres	2019
307	GCA_025477575.1	feces	France: Corbeille-Essonnes	2019
308	GCA_025477585.1	feces	France: Marseille	2019
309	GCA_025477735.1	feces	France: Neuilly-sur-Seine	2019
310	GCA_025477835.1	Peritoneal fluid	France: Amiens	2019
311	GCA_025477845.1	Blood culture	France: Poitiers	2019
312	GCA_025477875.1	feces	France: Aulnay-sous-bois	2019
313	GCA_025477895.1	feces	France: Niort	2019
314	GCA_025477915.1	feces	France: Paris	2019
315	GCA_025477925.1	feces	France: Forbach	2019
316	GCA_025477945.1	feces	France: Metz	2019
317	GCA_025478055.1	feces	France: Aix-en-Provence	2019
318	GCA_025478075.1	feces	France: Muret	2019
319	GCA_025478095.1	feces	France: Corbeil-Essonnes	2019
320	GCA_025478105.1	Unknow	France: Colmar	2019
321	GCA_025478125.1	Blood culture	France: Lyon	2019
322	GCA_025478175.1	feces	France: Avranches	2019
323	GCA_025599075.1	Pus	India: Puducherry	2020
324	GCA_025628795.1	Unknown	Malaysia: Sabah	2021
325	GCA_025629065.1	bile	China: Guangdong	2021
326	GCA_025862215.1	clinical sample	Switzerland	2019
327	GCA_025969405.1	Unknown	Australia	2019
328	GCA_025975305.1	Unknown	Australia	2019
329	GCA_025980845.1	Unknown	Australia	2020
330	GCA_025982245.1	Unknown	Australia	2019
331	GCA_026101755.2	RECTAL	USA:Boston	2022
332	GCA_026101895.2	BILIARY ASPIRATION	USA:Boston	2022
333	GCA_026102595.2	RECTAL	USA:Boston	2022
334	GCA_026300895.1	blood	Spain	2020
335	GCA_026303435.1	blood	West Bank	2020
336	GCA_026304635.1	swab (wound)	Lithuania	2020
337	GCA_026318025.1	urine	Burkina Faso	2020
338	GCA_026319515.1	unspecified diagnostic sample	Cyprus	2020
339	GCA_026320675.1	aspirate	Croatia	2020
340	GCA_026320715.1	blood	Croatia	2020
341	GCA_026320915.1	blood	Croatia	2020
342	GCA_026322895.1	swab (cavity)	Canada	2020
343	GCA_026322955.1	urine	Canada	2020
344	GCA_026322995.1	urine	Canada	2020
345	GCA_026329615.1	aspirate	Italy	2020
346	GCA_026329675.1	urine	Italy	2020
347	GCA_026330535.1	urine	Lithuania	2020
348	GCA_026330975.1	aspirate	Hungary	2020
349	GCA_026335555.1	swab (cavity)	Germany	2020
350	GCA_026335595.1	blood	Germany	2020
351	GCA_026347005.1	blood	Zambia	2020
352	GCA_026348335.1	blood	Thailand	2020
353	GCA_026348375.1	urine	Thailand	2020
354	GCA_026349695.1	swab (cavity)	Switzerland	2020
355	GCA_026350815.1	biopsy	Spain	2020
356	GCA_026353035.1	swab (cavity)	Paraguay	2020
357	GCA_026359715.1	unspecified diagnostic sample	Pakistan	2020
358	GCA_026409165.1	clinical	USA	2019
359	GCA_026437615.1	blood	Paraguay	2020
360	GCA_026770765.1	blood	India: Puducherry	2020
361	GCA_026929355.1	Unknown	Belgium: Wilrijk	2019
362	GCA_026929595.1	Unknown	Belgium: Wilrijk	2019
363	GCA_026934555.1	Unknown	Belgium: Wilrijk	2019
364	GCA_026934625.1	Unknown	Belgium: Wilrijk	2019
365	GCA_026935155.1	Unknown	Belgium: Wilrijk	2019
366	GCA_026935225.1	Unknown	Belgium: Wilrijk	2019
367	GCA_026935325.1	Unknown	Belgium: Wilrijk	2019
368	GCA_026935395.1	Unknown	Belgium: Wilrijk	2019
369	GCA_026936125.1	Unknown	Belgium: Wilrijk	2019
370	GCA_026949845.1	Rectal swab	Belgium: Sint-Niklaas	2019
371	GCA_026953915.1	Unknown	Belgium: Wilrijk	2019
372	GCA_026955575.1	Unknown	Switzerland: Zurich	2020
373	GCA_027286245.1	urine	China: Zhuhai	2022
374	GCA_027848495.1	wound swab	India: Puducherry	2021
375	GCA_027848515.1	Blood-peripheral	India: Puducherry	2021
376	GCA_027848535.1	blood	India: Puducherry	2021
377	GCA_028204075.1	blood	India: Puducherry	2021
378	GCA_028204215.1	blood	India: Puducherry	2021
379	GCA_028318305.1	Unknown	USA	2020
380	GCA_028769015.1	Swab rectum	Denmark	2019
381	GCA_028769215.1	Swab rectum	Denmark	2020
382	GCA_028769845.1	Drainage fluid	Denmark	2019
383	GCA_028769925.1	Swab rectum	Denmark	2019
384	GCA_028770045.1	Swab anus	Denmark	2021
385	GCA_028770265.1	Swab rectum	Denmark	2019
386	GCA_028770545.1	Swab rectum	Denmark	2019
387	GCA_028770685.1	Swab rectum	Denmark	2020
388	GCA_028771385.1	Swab rectum	Denmark	2022
389	GCA_028780155.1	Swab rectum	Denmark	2019
390	GCA_028780235.1	Drainage fluid	Denmark	2019
391	GCA_028781635.1	Swab rectum	Denmark	2020
392	GCA_028782205.1	Swab rectum	Denmark	2020
393	GCA_028782245.1	Aspirate, ventricle (stomach)	Denmark	2020
394	GCA_028783485.1	Swab rectum	Denmark	2021
395	GCA_028783585.1	Swab rectum	Denmark	2019
396	GCA_028783805.1	Swab rectum	Denmark	2022
397	GCA_028784095.1	Swab wound	Denmark	2021
398	GCA_028784175.1	Aspirate, ventricle (stomach)	Denmark	2020
399	GCA_028784215.1	Urine, catheter	Denmark	2019
400	GCA_028784275.1	Swab rectum	Denmark	2019
401	GCA_028784395.1	Drainage fluid	Denmark	2020
402	GCA_028784435.1	Swab rectum	Denmark	2021
403	GCA_028784965.1	Swab rectum	Denmark	2021
404	GCA_028785165.1	Swab rectum	Denmark	2019
405	GCA_028785625.1	Swab rectum	Denmark	2020
406	GCA_028785685.1	Swab rectum	Denmark	2021
407	GCA_028786185.1	Drainage fluid	Denmark	2020
408	GCA_028786205.1	Drainage fluid	Denmark	2019
409	GCA_028786365.1	Swab rectum	Denmark	2020
410	GCA_028786725.1	Fluid	Denmark	2019
411	GCA_029333735.1	urine	USA	2023
412	GCA_029334815.1	urine	USA	2023
413	GCA_029849325.1	blood	USA:AR	2019
414	GCA_029849715.1	urine	USA:AR	2019
415	GCA_029849735.1	urine	USA:AR	2019
416	GCA_029849865.1	urine	USA:AR	2019
417	GCA_029849995.1	urine	USA:AR	2019
418	GCA_030339975.1	urine	South Korea: Seoul	2019
419	GCA_030340025.1	urine	South Korea: Seoul	2019
420	GCA_030340045.1	blood	South Korea: Seoul	2019
421	GCA_030340075.1	blood	South Korea: Seoul	2019
422	GCA_030340165.1	urine	South Korea: Seoul	2019
423	GCA_030340255.1	Bile, Percutaneous transhepatic biliary drainage (PTBD)	South Korea: Seoul	2019
424	GCA_030340365.1	catheter blood	South Korea: Seoul	2019
425	GCA_030340405.1	catheter blood	South Korea: Seoul	2019
426	GCA_030340495.1	urine	South Korea: Seoul	2020
427	GCA_030346905.1	Rectal Swab	Brazil: Curitiba	2019
428	GCA_030581795.1	blood	South Korea	2019
429	GCA_030584265.1	blood	South Korea	2019
430	GCA_030584345.1	blood	South Korea	2019
431	GCA_030584525.1	blood	South Korea	2019
432	GCA_030584685.1	blood	South Korea	2019
433	GCA_030656855.1	blood	South Korea	2019
434	GCA_030656915.1	blood	South Korea	2019
435	GCA_030656935.1	blood	South Korea	2019
436	GCA_030656975.1	blood	South Korea	2019
437	GCA_030656995.1	blood	South Korea	2019
438	GCA_030657015.1	blood	South Korea	2019
439	GCA_030657075.1	blood	South Korea	2019
440	GCA_030664825.1	blood	South Korea	2019
441	GCA_030665025.1	blood	South Korea	2019
442	GCA_030665125.1	blood	South Korea	2019
443	GCA_030665285.1	blood	South Korea	2019
444	GCA_030665345.1	blood	South Korea	2019
445	GCA_030665385.1	blood	South Korea	2019
446	GCA_030665405.1	blood	South Korea	2019
447	GCA_030685655.1	blood	South Korea	2019
448	GCA_030685735.1	blood	South Korea	2019
449	GCA_030685915.1	blood	South Korea	2019
450	GCA_030714915.1	urine	Italy	2022
451	GCA_030714935.1	Abdominal drainage	Italy	2022
452	GCA_030714965.1	Peritoneal fluid	Italy	2022
453	GCA_030714975.1	urine	Italy	2022
454	GCA_030714985.1	Pus	Italy	2022
455	GCA_030867205.1	blood	Norway	2019
456	GCA_030915685.2	urine	USA:Boston	2022
457	GCA_030915845.2	Rectal	USA:Boston	2022
458	GCA_030916125.2	Rectal	USA:Boston	2022
459	GCA_030916305.2	Rectal	USA:Boston	2023
460	GCA_030942865.1	clinical	New Zealand	2022
461	GCA_030942925.1	blood	Spain	2021
462	GCA_030943345.2	stool	USA:Boston	2022
463	GCA_030943445.2	urine	USA:Boston	2022
464	GCA_030943765.1	blood	Uganda	2019
465	GCA_030943865.1	blood	Uganda	2021
466	GCA_030943955.1	blood	Uganda	2019
467	GCA_030944065.1	blood	Uganda	2021
468	GCA_030944085.1	blood	Uganda	2021
469	GCA_030944145.1	blood	India: Mumbai	2019
470	GCA_030944165.1	blood	India: Chandigarh	2019
471	GCA_030944185.1	blood	India: Mumbai	2019
472	GCA_030944225.1	bile	India: Mumbai	2019
473	GCA_030952505.2	Rectal swab	USA:Boston	2022
474	GCA_030979025.1	Unknown	Australia:Victoria	2022
475	GCA_030979245.1	Unknown	Australia:Victoria	2022
476	GCA_030979305.1	Unknown	Australia:Victoria	2022
477	GCA_030979325.1	Unknown	Australia:Victoria	2022
478	GCA_030979345.1	Unknown	Australia:Victoria	2022
479	GCA_030979465.1	Unknown	Australia:Victoria	2022
480	GCA_030979485.1	Unknown	Australia:Victoria	2022
481	GCA_030979545.1	Unknown	Australia:Victoria	2022
482	GCA_030979825.1	Unknown	Australia:Victoria	2022
483	GCA_031733135.1	Unknown	China:Peking	2021
484	GCA_031736875.1	Unknown	China:Peking	2021
485	GCA_031736975.1	Unknown	China:Peking	2020
486	GCA_031737415.1	Unknown	China:Peking	2020
487	GCA_031844765.1	blood	Thailand: Bangkok	2019
488	GCA_031844785.1	blood	Thailand: Chanthaburi	2019
489	GCA_031844825.1	blood	Thailand: Phitsanulok	2019
490	GCA_031844885.1	urine	Thailand: Roi Et	2019
491	GCA_031844905.1	urine	Thailand: Nakhon Phanom	2019
492	GCA_031844925.1	urine	Thailand: Sakon Nakhon	2020
493	GCA_031844985.1	blood	Thailand: Surat Thani	2019
494	GCA_031845045.1	urine	Thailand: Sakon Nakhon	2020
495	GCA_031925245.1	feces	China	2022
496	GCA_031925265.1	feces	China	2022
497	GCA_031925285.1	feces	China	2022
498	GCA_031925305.1	feces	China	2022
499	GCA_031925315.1	feces	China	2022
500	GCA_031925345.1	feces	China	2022
501	GCA_031925365.1	feces	China	2022
502	GCA_031925385.1	feces	China	2022
503	GCA_031925405.1	feces	China	2022
504	GCA_031925425.1	feces	China	2022
505	GCA_031925445.1	feces	China	2022
506	GCA_031925465.1	feces	China	2022
507	GCA_031925485.1	feces	China	2022
508	GCA_031925505.1	feces	China	2022
509	GCA_031925525.1	feces	China	2022
510	GCA_031925545.1	feces	China	2022
511	GCA_032121575.2	Rectal screening swab	USA:Boston	2023
512	GCA_032121995.2	Rectal screening swab	USA:Boston	2023
513	GCA_032209225.1	Unknown	China:Peking	2020
514	GCA_032376485.1	Unknown	France	2022
515	GCA_032655865.1	blood	South Korea	2019
516	GCA_032667285.1	blood	USA: Houston	2019
517	GCA_032667305.1	Rectal swab	USA: Houston	2019
518	GCA_032667385.1	Rectal swab	USA: Houston	2019
519	GCA_032669265.1	blood	USA: Houston	2019
520	GCA_032669325.1	blood	USA: Houston	2019
521	GCA_032669345.1	blood	USA: Houston	2019
522	GCA_033130085.1	Necrosectomy	Japan:Nagano, matsumoto	2022
523	GCA_033256165.1	Blood Culture	Canada	2019
524	GCA_033657405.1	Unknown	China: Shenzhen	2023
525	GCA_034301975.1	wound	USA: Pittsburgh, Pennsylvania	2022
526	GCA_034302255.1	Tissue	USA: Pittsburgh, Pennsylvania	2022
527	GCA_034302295.1	Tissue	USA: Pittsburgh, Pennsylvania	2022
528	GCA_034302815.1	urine	USA: Pittsburgh, Pennsylvania	2022
529	GCA_034303355.1	wound	USA: Pittsburgh, Pennsylvania	2023
530	GCA_034303395.1	clinical	New Zealand	2023
531	GCA_034304295.1	urine	USA: Pittsburgh, Pennsylvania	2021
532	GCA_034304375.1	urine	USA: Pittsburgh, Pennsylvania	2021
533	GCA_034304435.1	blood	USA: Pittsburgh, Pennsylvania	2021
534	GCA_034304825.1	urine	USA: Pittsburgh, Pennsylvania	2022
535	GCA_034304895.1	Peritoneal Fluid	USA: Pittsburgh, Pennsylvania	2022
536	GCA_034305665.1	urine	USA: Pittsburgh, Pennsylvania	2023
537	GCA_034308185.1	urine	USA: Pittsburgh, Pennsylvania	2022
538	GCA_034308225.1	Tissue	USA: Pittsburgh, Pennsylvania	2022
539	GCA_034308505.1	wound	USA: Pittsburgh, Pennsylvania	2023
540	GCA_034308865.1	urine	USA: Pittsburgh, Pennsylvania	2023
541	GCA_034308925.1	wound	USA: Pittsburgh, Pennsylvania	2023
542	GCA_034309245.1	not collected	USA: Pittsburgh, Pennsylvania	2023
543	GCA_034311225.1	blood	USA: Pittsburgh, Pennsylvania	2022
544	GCA_034311405.1	blood	USA: Pittsburgh, Pennsylvania	2022
545	GCA_034311605.1	Tissue	USA: Pittsburgh, Pennsylvania	2022
546	GCA_034311915.1	wound	USA: Pittsburgh, Pennsylvania	2022
547	GCA_034371005.1	Rectal swab	Denmark:Copenhagen	2021
548	GCA_034371525.1	Rectal swab	Denmark:Copenhagen	2022
549	GCA_034371565.1	Rectal swab	Denmark:Copenhagen	2022
550	GCA_034371645.1	Rectal swab	Denmark:Copenhagen	2019
551	GCA_034371985.1	Rectal swab	Denmark:Copenhagen	2019
552	GCA_034480845.1	rectal swab	Denmark:Copenhagen	2019
553	GCA_034480925.1	rectal swab	Denmark:Copenhagen	2020
554	GCA_034481185.1	rectal swab	Denmark:Copenhagen	2022
555	GCA_034481845.1	rectal swab	Denmark:Copenhagen	2019
556	GCA_034481865.1	rectal swab	Denmark:Copenhagen	2021
557	GCA_034483665.1	urine	Denmark:Copenhagen	2020
558	GCA_034485145.1	rectal swab	Denmark:Copenhagen	2021
559	GCA_034485285.1	rectal swab	Denmark:Copenhagen	2022
560	GCA_034524375.1	Rectal swab	Denmark:Copenhagen	2019
561	GCA_034644175.1	Infected Human Urine	USA: Dallas, Texas	2022
562	GCA_034653035.1	Rectal samples	Lebanon	2021
563	GCA_034653115.1	Rectal samples	Lebanon	2022
564	GCA_034653135.1	Rectal samples	Lebanon	2022
565	GCA_036409195.1	urine	China:Shanghai	2021
566	GCA_036814275.1	Unknown	Thailand: Bangkok	2023
567	GCA_037095195.1	Ulcer	United Kingdom: Sheffield	2019
568	GCA_037095215.1	Ulcer	United Kingdom: Sheffield	2019
569	GCA_037470175.1	blood	China	2023
570	GCA_037470215.1	urine	China	2023
571	GCA_037470505.1	urine	China	2022
572	GCA_037471725.1	wound	China	2023
573	GCA_037471915.1	blood	China	2023
574	GCA_037471965.1	urine	China	2023
575	GCA_037472195.1	CSF	China	2022
576	GCA_037472225.1	wound	China	2022
577	GCA_037472705.1	urine	China	2022
578	GCA_037472765.1	Surgical site	China	2022
579	GCA_037473025.1	sputum	China	2022
580	GCA_037473155.1	urine	China	2022
581	GCA_037473255.1	Surgical site	China	2019
582	GCA_037473285.1	Surgical site	China	2019
583	GCA_037473485.1	urine	China	2021
584	GCA_037473565.1	urine	China	2021
585	GCA_037473655.1	Ascitic fluid	China	2021
586	GCA_037473695.1	blood	China	2020
587	GCA_037473775.1	urine	China	2020
588	GCA_037473855.1	Surgical site	China	2019
589	GCA_037473895.1	urine	China	2022
590	GCA_037473995.1	urine	China	2022
591	GCA_037474125.1	urine	China	2022
592	GCA_037474465.1	urine	China	2022
593	GCA_037474585.1	Ascitic fluid	China	2022
594	GCA_037474625.1	Ascitic fluid	China	2020
595	GCA_037474665.1	Ascitic fluid	China	2022
596	GCA_037475065.1	sputum	China	2019
597	GCA_037475085.1	urine	China	2019
598	GCA_037476125.1	urine	China	2022
599	GCA_037476165.1	bile	China	2022
600	GCA_037476285.1	urine	China	2022
601	GCA_037476445.1	urine	China	2023
602	GCA_037476645.1	other	China	2022
603	GCA_037477025.1	bile	China	2019
604	GCA_037477035.1	urine	China	2022
605	GCA_037477105.1	wound	China	2022
606	GCA_037477125.1	urine	China	2022
607	GCA_037477145.1	urine	China	2022
608	GCA_037477165.1	Surgical site	China	2022
609	GCA_037477185.1	blood	China	2021
610	GCA_037477205.1	urine	China	2022
611	GCA_037477245.1	blood	China	2023
612	GCA_037477665.1	urine	China	2022
613	GCA_037966965.1	Unknown	Zimbabwe	2022
614	GCA_037966985.1	Unknown	Zimbabwe	2022
615	GCA_947051665.1	blood	France	2020
616	GCA_947051675.1	urine	France	2021
617	GCA_947051685.1	urine	France	2021
618	GCA_947051705.1	Bone biopsy	France	2020
619	GCA_947051715.1	blood	France	2021
620	GCA_947051735.1	blood	France	2020
621	GCA_947051775.1	Abdominal drainage	France	2020
622	GCA_947051795.1	Bone biopsy	France	2021
623	GCA_947051815.1	urine	France	2021
624	GCA_947051825.1	bile	France	2020
625	GCA_947051845.1	urine	France	2021
626	GCA_947051855.1	urine	France	2021
627	GCA_947051895.1	blood	France	2020
628	GCA_947051905.1	Peritoneal fluid	France	2020
629	GCA_947051925.1	bile	France	2020
630	GCA_947051945.1	Abdominal collection	France	2021
631	GCA_947051995.1	urine	France	2021
632	GCA_947052015.1	Peritoneal fluid	France	2020
633	GCA_947052035.1	bile	France	2020
634	GCA_947052065.1	bile	France	2020
635	GCA_947052075.1	Peritoneal fluid	France	2020
636	GCA_947052085.1	Peritoneal fluid	France	2020
637	GCA_947052105.1	urine	France	2021
638	GCA_947052115.1	Peritoneal fluid	France	2020
639	GCA_947052125.1	bile	France	2020

## Sheet: S7g
Table S7g: Metadata of clinical P. mirabilis isolates from NCBI database
S. No.	Assembly	Sample source	Location	Year of collection
1	GCA_009429045.2	urine catheter	Italy: Lodi	2019
2	GCA_011383025.1	body fluid	China:Hangzhou	2019
3	GCA_011383045.1	urine	China:Hangzhou	2020
4	GCA_013184715.1	sputum sample from hospital patient	China:Hangzhou	2019
5	GCA_013357545.1	feces	China:Guangzhou	2019
6	GCA_016237355.1	Tissue	USA: Pittsburgh, Pennsylvania	2019
7	GCA_016237385.1	Tissue	USA: Pittsburgh, Pennsylvania	2019
8	GCA_016237435.1	urine	USA: Pittsburgh, Pennsylvania	2019
9	GCA_016237455.1	sputum	USA: Pittsburgh, Pennsylvania	2019
10	GCA_016237505.1	wound	USA: Pittsburgh, Pennsylvania	2019
11	GCA_016237525.1	sputum	USA: Pittsburgh, Pennsylvania	2019
12	GCA_016237545.1	urine	USA: Pittsburgh, Pennsylvania	2019
13	GCA_016237645.1	urine	USA: Pittsburgh, Pennsylvania	2019
14	GCA_016237685.1	sputum	USA: Pittsburgh, Pennsylvania	2019
15	GCA_016237745.1	urine	USA: Pittsburgh, Pennsylvania	2019
16	GCA_016237825.1	urine	USA: Pittsburgh, Pennsylvania	2019
17	GCA_016237845.1	urine	USA: Pittsburgh, Pennsylvania	2019
18	GCA_016237905.1	sputum	USA: Pittsburgh, Pennsylvania	2019
19	GCA_016237925.1	not collected	USA: Pittsburgh, Pennsylvania	2019
20	GCA_016238045.1	Tissue	USA: Pittsburgh, Pennsylvania	2019
21	GCA_016238065.1	sputum	USA: Pittsburgh, Pennsylvania	2019
22	GCA_016238145.1	urine	USA: Pittsburgh, Pennsylvania	2019
23	GCA_016238165.1	wound	USA: Pittsburgh, Pennsylvania	2019
24	GCA_016238185.1	blood	USA: Pittsburgh, Pennsylvania	2019
25	GCA_016238235.1	urine	USA: Pittsburgh, Pennsylvania	2019
26	GCA_016238305.1	urine	USA: Pittsburgh, Pennsylvania	2019
27	GCA_016238345.1	wound	USA: Pittsburgh, Pennsylvania	2019
28	GCA_016238365.1	sputum	USA: Pittsburgh, Pennsylvania	2019
29	GCA_016238505.1	sputum	USA: Pittsburgh, Pennsylvania	2019
30	GCA_016238605.1	urine	USA: Pittsburgh, Pennsylvania	2019
31	GCA_016238885.1	urine	USA: Pittsburgh, Pennsylvania	2019
32	GCA_016239025.1	wound	USA: Pittsburgh, Pennsylvania	2019
33	GCA_016239045.1	sputum	USA: Pittsburgh, Pennsylvania	2019
34	GCA_016239105.1	wound	USA: Pittsburgh, Pennsylvania	2019
35	GCA_016239145.1	sputum	USA: Pittsburgh, Pennsylvania	2019
36	GCA_016239175.1	urine	USA: Pittsburgh, Pennsylvania	2019
37	GCA_016939715.1	sputum	Czech Republic: Nymburk	2019
38	GCA_016974075.3	blood	USA	2020
39	GCA_018068605.1	urine	USA	2019
40	GCA_018068925.1	urine	USA	2019
41	GCA_018287495.3	Urine specimen obtained by clean catch procedure	USA	2021
42	GCA_018287555.3	Urinary catheter specimen	USA	2021
43	GCA_018861165.1	urine	Italy:Pavia	2019
44	GCA_019572235.1	diarrhea	Iraq: Al Muthanna	2021
45	GCA_019735095.1	Bacterial isolate specimen	USA	2019
46	GCA_020677605.3	Bacterial isolate specimen	USA	2019
47	GCA_020678605.3	Rectal swab	USA	2019
48	GCA_020680085.3	urine	USA	2019
49	GCA_020680965.2	Rectal swab	USA	2019
50	GCA_020816815.1	urine	USA	2021
51	GCA_021095785.1	urine	France	2020
52	GCA_021449205.1	Rectal swab	USA	2021
53	GCA_022107195.3	Wound/Abscess	USA	2020
54	GCA_022253455.2	urine	USA	2020
55	GCA_022453625.1	urine	China:Hangzhou	2021
56	GCA_022890875.3	Unknown	USA	2021
57	GCA_022948735.3	urine	USA	2022
58	GCA_023093855.1	Unknown	China:Zhejiang	2020
59	GCA_023203255.3	Rectal Swab	USA	2022
60	GCA_023653395.1	Unknown	China:Luzhou	2021
61	GCA_023702555.1	Unknown	China:Luzhou	2021
62	GCA_023702575.1	Unknown	China:Luzhou	2021
63	GCA_024145045.3	urine	USA	2022
64	GCA_024555005.2	urine	USA	2022
65	GCA_024731525.3	urine	USA	2022
66	GCA_025036465.1	Unknown	Canada	2019
67	GCA_025147205.3	urine	USA	2022
68	GCA_025286055.3	Leg	USA	2022
69	GCA_025379285.1	Unknown	China:Luzhou	2021
70	GCA_025379305.1	Unknown	China:Luzhou	2021
71	GCA_025379315.1	Unknown	China:Luzhou	2021
72	GCA_025379325.1	Unknown	China:Luzhou	2021
73	GCA_025379395.1	Unknown	China:Luzhou	2021
74	GCA_025379405.1	Unknown	China:Luzhou	2021
75	GCA_025379455.1	Unknown	China:Luzhou	2021
76	GCA_025379495.1	Unknown	China:Luzhou	2021
77	GCA_025379525.1	Unknown	China:Luzhou	2021
78	GCA_025379545.1	Unknown	China:Luzhou	2021
79	GCA_025379565.1	Unknown	China:Luzhou	2021
80	GCA_025379645.1	Unknown	China:Luzhou	2021
81	GCA_025660455.1	sputum	China: Shandong	2019
82	GCA_025660525.1	wound secretions	China: Shandong	2020
83	GCA_025660555.1	urine	China: Shandong	2020
84	GCA_025660575.1	sputum	China: Shandong	2021
85	GCA_025660635.1	blood	China: Shandong	2021
86	GCA_025863315.2	urine	USA	2022
87	GCA_025886585.4	urine	USA	2022
88	GCA_025974925.1	Unknown	Australia: Victoria	2019
89	GCA_026167565.1	clinical isolate	China: Guangzhou	2019
90	GCA_026298975.1	lavage	Paraguay	2020
91	GCA_026300395.1	unspecified diagnostic sample	Algeria	2020
92	GCA_026304055.1	urine	Australia	2020
93	GCA_026311175.1	swab (wound)	Nigeria	2020
94	GCA_026312755.1	urine	France	2020
95	GCA_026314215.1	swab (unspecified)	Zambia	2020
96	GCA_026319735.1	swab (wound)	Cyprus	2020
97	GCA_026320855.1	urine	Croatia	2020
98	GCA_026320955.1	urine	Croatia	2020
99	GCA_026327955.1	urine	New Zealand	2020
100	GCA_026330255.1	urine	Canada	2020
101	GCA_026332675.1	swab (wound)	Burkina Faso	2020
102	GCA_026334475.1	swab (wound)	Ghana	2020
103	GCA_026335815.1	swab (wound)	Germany	2020
104	GCA_026336795.1	urine	France	2020
105	GCA_026336835.1	blood	France	2020
106	GCA_026342875.1	urine	Denmark	2020
107	GCA_026345235.1	urine	Czech Republic	2020
108	GCA_026345275.1	urine	Czech Republic	2020
109	GCA_026345595.1	swab (wound)	Bulgaria	2020
110	GCA_026345635.1	swab (wound)	Bulgaria	2020
111	GCA_026346035.1	urine	Benin	2020
112	GCA_026346295.1	swab (superficial and non-surgical)	Bangladesh	2020
113	GCA_026346615.1	urine	Albania	2020
114	GCA_026346935.1	swab (unspecified)	Zambia	2020
115	GCA_026347095.1	swab (wound)	Zambia	2020
116	GCA_026347175.1	urine	Zambia	2020
117	GCA_026347195.1	swab (wound)	Zambia	2020
118	GCA_026348155.1	swab (wound)	Turkey	2020
119	GCA_026350035.1	urine	Switzerland	2020
120	GCA_026350635.1	unspecified diagnostic sample	Spain	2020
121	GCA_026354095.1	unspecified diagnostic sample	Paraguay	2020
122	GCA_026361175.1	unspecified diagnostic sample	Algeria	2020
123	GCA_026957035.1	Eschar	Spain	2019
124	GCA_026957475.1	Blood culture	Australia:Queensland	2020
125	GCA_026958935.1	Blood culture	Australia:Queensland	2020
126	GCA_027270335.1	hospital	South Korea: Seoul	2019
127	GCA_027270345.1	hospital	South Korea: Seoul	2019
128	GCA_027270465.1	hospital	South Korea: Seoul	2019
129	GCA_027820735.2	sputum	USA	2022
130	GCA_028058255.3	tracheal aspirate	USA	2022
131	GCA_028062495.3	urine	USA	2019
132	GCA_028062615.3	urine	USA	2019
133	GCA_028063435.3	sputum	USA	2021
134	GCA_028066495.3	urine	USA	2019
135	GCA_028216695.3	Unknown	USA	2022
136	GCA_028641415.4	urine	USA	2023
137	GCA_028886105.3	urine	USA	2023
138	GCA_029046605.3	Rectal swab	USA	2022
139	GCA_029626545.4	urine	USA	2023
140	GCA_030162345.1	sputum	China:Luzhou	2022
141	GCA_030162365.1	sputum	China:Luzhou	2022
142	GCA_030162385.1	Wound secretion	China:Luzhou	2022
143	GCA_030162435.1	stool	China:Luzhou	2022
144	GCA_030162465.1	sputum	China:Luzhou	2022
145	GCA_030162495.1	Vaginal secretion	China:Luzhou	2022
146	GCA_030162505.1	sputum	China:Luzhou	2022
147	GCA_030162535.1	urine	China:Luzhou	2022
148	GCA_030162545.1	urine	China:Luzhou	2022
149	GCA_030162575.1	Ascites	China:Luzhou	2022
150	GCA_030262105.1	Unknown	Belgium:Leuven	2022
151	GCA_030262215.1	Unknown	Brazil:Venda Nova do Imigrante	2021
152	GCA_030262275.1	Unknown	Belgium:Leuven	2021
153	GCA_030262355.1	Unknown	Belgium:Leuven	2021
154	GCA_030411275.1	clinical	USA: Pittsburgh	2022
155	GCA_030507145.1	Unknown	USA	2022
156	GCA_030793625.1	sputum	Japan:Tokushima	2020
157	GCA_030793885.1	others	Japan:Tokushima	2019
158	GCA_030805805.1	urine from catheter	Japan:Wakayama	2019
159	GCA_030819895.1	urine	Japan:Yamagata	2019
160	GCA_030819955.1	urine from catheter	Japan:Wakayama	2019
161	GCA_030928605.1	Blood culture	USA: Philadelphia, PA	2021
162	GCA_030929795.1	urine	USA	2023
163	GCA_031098275.2	urine	USA	2023
164	GCA_031098295.2	wound	USA	2023
165	GCA_031104625.2	urine	USA	2023
166	GCA_031105105.2	urine	USA:Boston	2022
167	GCA_031105385.2	urine	USA:Boston	2022
168	GCA_031105665.2	Homo Sapiens clinical	USA: Florida	2022
169	GCA_031106555.2	blood	USA	2023
170	GCA_031106855.2	urine	USA	2023
171	GCA_031113975.2	urine	USA	2023
172	GCA_031131485.2	Urine specimen obtained by clean catch procedure	USA	2023
173	GCA_031138635.2	wound	USA	2023
174	GCA_031142715.2	urine	USA	2023
175	GCA_031154705.1	others	Japan:Yamagata	2020
176	GCA_031154725.1	urine	Japan:Hokkaido	2019
177	GCA_031630295.1	Other clinical sources	Brazil: Belo Horizonte	2019
178	GCA_031630315.1	blood	Brazil: Belo Horizonte	2019
179	GCA_031640535.2	Rectal swab	USA	2023
180	GCA_031857415.1	urine	USA: St. Louis	2021
181	GCA_031857455.1	urine	USA: St. Louis	2021
182	GCA_031857475.1	Wound/Tissue/Ulcer	USA: St. Louis	2021
183	GCA_031857575.1	urine	USA: St. Louis	2021
184	GCA_031857695.1	urine	USA: St. Louis	2021
185	GCA_031857795.1	urine	USA: St. Louis	2021
186	GCA_031857815.1	urine	USA: St. Louis	2021
187	GCA_031857835.1	urine	USA: St. Louis	2021
188	GCA_031857915.1	urine	USA: St. Louis	2021
189	GCA_031858055.1	urine	USA: St. Louis	2021
190	GCA_031858075.1	urine	USA: St. Louis	2021
191	GCA_031858195.1	urine	USA: St. Louis	2021
192	GCA_031858235.1	urine	USA: St. Louis	2021
193	GCA_031858255.1	urine	USA: St. Louis	2021
194	GCA_031858295.1	urine	USA: St. Louis	2021
195	GCA_031858335.1	urine	USA: St. Louis	2021
196	GCA_031858355.1	urine	USA: St. Louis	2021
197	GCA_031858375.1	Wound/Tissue/Ulcer	USA: St. Louis	2021
198	GCA_031858555.1	Wound/Tissue/Ulcer	USA: St. Louis	2021
199	GCA_031858695.1	Wound/Tissue/Ulcer	USA: St. Louis	2021
200	GCA_031858835.1	urine	USA: St. Louis	2021
201	GCA_031858895.1	urine	USA: St. Louis	2021
202	GCA_031859015.1	urine	USA: St. Louis	2021
203	GCA_031859035.1	urine	USA: St. Louis	2021
204	GCA_031859135.1	urine	USA: St. Louis	2021
205	GCA_031859155.1	urine	USA: St. Louis	2021
206	GCA_031859325.1	urine	USA: St. Louis	2021
207	GCA_031859375.1	urine	USA: St. Louis	2021
208	GCA_031859475.1	blood	USA: St. Louis	2021
209	GCA_031859555.1	urine	USA: St. Louis	2021
210	GCA_031859615.1	urine	USA: St. Louis	2021
211	GCA_031859675.1	urine	USA: St. Louis	2021
212	GCA_031859715.1	respiratory	USA: St. Louis	2021
213	GCA_031859775.1	urine	USA: St. Louis	2021
214	GCA_031859835.1	urine	USA: St. Louis	2021
215	GCA_031859915.1	bone	USA: St. Louis	2021
216	GCA_031860075.1	urine	USA: St. Louis	2021
217	GCA_031860095.1	urine	USA: St. Louis	2021
218	GCA_031860135.1	Not Obtained	USA: St. Louis	2021
219	GCA_031860255.1	urine	USA: St. Louis	2021
220	GCA_031860315.1	urine	USA: St. Louis	2021
221	GCA_031860655.1	urine	USA: St. Louis	2021
222	GCA_031860915.1	Wound/Tissue/Ulcer	USA: St. Louis	2021
223	GCA_031860955.1	blood	USA: St. Louis	2021
224	GCA_031861055.1	urine	USA: St. Louis	2021
225	GCA_031861135.1	urine	USA: St. Louis	2021
226	GCA_031861235.1	Wound/Tissue/Ulcer	USA: St. Louis	2021
227	GCA_031861255.1	urine	USA: St. Louis	2021
228	GCA_031861315.1	urine	USA: St. Louis	2021
229	GCA_031861355.1	urine	USA: St. Louis	2021
230	GCA_031861395.1	urine	USA: St. Louis	2021
231	GCA_031861415.1	urine	USA: St. Louis	2021
232	GCA_031861515.1	urine	USA: St. Louis	2021
233	GCA_031861575.1	Wound/Tissue/Ulcer	USA: St. Louis	2021
234	GCA_031861775.1	urine	USA: St. Louis	2021
235	GCA_031861875.1	urine	USA: St. Louis	2021
236	GCA_031861895.1	urine	USA: St. Louis	2021
237	GCA_031862015.1	urine	USA: St. Louis	2021
238	GCA_031862135.1	urine	USA: St. Louis	2021
239	GCA_031862155.1	urine	USA: St. Louis	2021
240	GCA_031862255.1	urine	USA: St. Louis	2021
241	GCA_031862275.1	urine	USA: St. Louis	2021
242	GCA_031862355.1	urine	USA: St. Louis	2021
243	GCA_031862515.1	urine	USA: St. Louis	2021
244	GCA_031862615.1	urine	USA: St. Louis	2021
245	GCA_031862795.1	Wound/Tissue/Ulcer	USA: St. Louis	2021
246	GCA_031862815.1	urine	USA: St. Louis	2021
247	GCA_031862975.1	Wound/Tissue/Ulcer	USA: St. Louis	2021
248	GCA_031862995.1	urine	USA: St. Louis	2021
249	GCA_031863035.1	urine	USA: St. Louis	2021
250	GCA_031863055.1	urine	USA: St. Louis	2021
251	GCA_031863075.1	urine	USA: St. Louis	2021
252	GCA_031863155.1	Wound/Tissue/Ulcer	USA: St. Louis	2021
253	GCA_031863215.1	urine	USA: St. Louis	2021
254	GCA_031863395.1	respiratory	USA: St. Louis	2021
255	GCA_031863535.1	urine	USA: St. Louis	2021
256	GCA_031863575.1	urine	USA: St. Louis	2021
257	GCA_031863615.1	Wound/Tissue/Ulcer	USA: St. Louis	2021
258	GCA_031863655.1	urine	USA: St. Louis	2021
259	GCA_031863675.1	urine	USA: St. Louis	2021
260	GCA_031863755.1	blood	USA: St. Louis	2021
261	GCA_031863795.1	urine	USA: St. Louis	2021
262	GCA_031863855.1	Wound/Tissue/Ulcer	USA: St. Louis	2021
263	GCA_031863935.1	urine	USA: St. Louis	2021
264	GCA_031864015.1	urine	USA: St. Louis	2021
265	GCA_031864035.1	urine	USA: St. Louis	2021
266	GCA_031864175.1	urine	USA: St. Louis	2021
267	GCA_031864195.1	Wound/Tissue/Ulcer	USA: St. Louis	2021
268	GCA_031864215.1	Wound/Tissue/Ulcer	USA: St. Louis	2021
269	GCA_031864315.1	urine	USA: St. Louis	2021
270	GCA_031864345.1	urine	USA: St. Louis	2021
271	GCA_031864395.1	urine	USA: St. Louis	2021
272	GCA_031864415.1	urine	USA: St. Louis	2021
273	GCA_031864455.1	urine	USA: St. Louis	2021
274	GCA_031864555.1	Wound/Tissue/Ulcer	USA: St. Louis	2021
275	GCA_031864635.1	Wound/Tissue/Ulcer	USA: St. Louis	2021
276	GCA_031864655.1	bone	USA: St. Louis	2021
277	GCA_031864665.1	Wound/Tissue/Ulcer	USA: St. Louis	2021
278	GCA_031864855.1	blood	USA: St. Louis	2021
279	GCA_031864875.1	blood	USA: St. Louis	2021
280	GCA_031865015.1	blood	USA: St. Louis	2021
281	GCA_031865055.1	blood	USA: St. Louis	2021
282	GCA_031865095.1	blood	USA: St. Louis	2021
283	GCA_031865105.1	blood	USA: St. Louis	2021
284	GCA_031865135.1	blood	USA: St. Louis	2021
285	GCA_031865175.1	blood	USA: St. Louis	2021
286	GCA_031865235.1	blood	USA: St. Louis	2021
287	GCA_031865355.1	urine	USA: Chicago	2021
288	GCA_031865435.1	urine	USA: Chicago	2021
289	GCA_031865495.1	urine	USA: Chicago	2021
290	GCA_031865515.1	urine	USA: Chicago	2021
291	GCA_031865555.1	Gastrointestinal	USA: St. Louis	2021
292	GCA_031865695.1	Not Obtained	USA: St. Louis	2021
293	GCA_031865735.1	urine	USA: St. Louis	2021
294	GCA_031865795.1	Not Obtained	USA: St. Louis	2021
295	GCA_031865835.1	Not Obtained	USA: St. Louis	2021
296	GCA_031865875.1	urine	USA: St. Louis	2021
297	GCA_031866035.1	Wound/Tissue/Ulcer	USA: St. Louis	2021
298	GCA_031866155.1	blood	USA: St. Louis	2021
299	GCA_031866195.1	blood	USA: St. Louis	2021
300	GCA_031866215.1	bone	USA: St. Louis	2021
301	GCA_031866235.1	blood	USA: St. Louis	2021
302	GCA_031866375.1	blood	USA: St. Louis	2021
303	GCA_031866475.1	Wound/Tissue/Ulcer	USA: St. Louis	2021
304	GCA_031866515.1	bone	USA: St. Louis	2021
305	GCA_031866535.1	bone	USA: St. Louis	2021
306	GCA_031866555.1	blood	USA: St. Louis	2021
307	GCA_031866575.1	Wound/Tissue/Ulcer	USA: St. Louis	2021
308	GCA_031866615.1	blood	USA: St. Louis	2021
309	GCA_031866655.1	Wound/Tissue/Ulcer	USA: St. Louis	2021
310	GCA_031866935.1	Wound/Tissue/Ulcer	USA: St. Louis	2021
311	GCA_031867015.1	blood	USA: St. Louis	2021
312	GCA_031867095.1	bone	USA: St. Louis	2021
313	GCA_031867215.1	Wound/Tissue/Ulcer	USA: St. Louis	2021
314	GCA_031867235.1	blood	USA: St. Louis	2021
315	GCA_031867475.1	bone	USA: St. Louis	2021
316	GCA_031867515.1	blood	USA: St. Louis	2021
317	GCA_031867555.1	Wound/Tissue/Ulcer	USA: St. Louis	2021
318	GCA_031867815.1	urine	USA: St. Louis	2021
319	GCA_031867965.1	Wound/Tissue/Ulcer	USA: St. Louis	2021
320	GCA_031868055.1	blood	USA: St. Louis	2021
321	GCA_031868075.1	Wound/Tissue/Ulcer	USA: St. Louis	2021
322	GCA_031868095.1	Wound/Tissue/Ulcer	USA: St. Louis	2021
323	GCA_031868115.1	Wound/Tissue/Ulcer	USA: St. Louis	2021
324	GCA_031868155.1	Wound/Tissue/Ulcer	USA: St. Louis	2021
325	GCA_031868235.1	Stone	USA: St. Louis	2021
326	GCA_031868275.1	urine	USA: St. Louis	2021
327	GCA_031868295.1	urine	USA: St. Louis	2021
328	GCA_031868315.1	urine	USA: St. Louis	2021
329	GCA_031868655.1	urine	USA: St. Louis	2021
330	GCA_031868855.1	Wound/Tissue/Ulcer	USA: St. Louis	2021
331	GCA_031868915.1	urine	USA: St. Louis	2021
332	GCA_031868955.1	urine	USA: St. Louis	2021
333	GCA_031869175.1	urine	USA: St. Louis	2021
334	GCA_031869255.1	bone	USA: St. Louis	2021
335	GCA_031869355.1	urine	USA: St. Louis	2021
336	GCA_031869415.1	Wound/Tissue/Ulcer	USA: St. Louis	2021
337	GCA_031869455.1	urine	USA: St. Louis	2021
338	GCA_031869495.1	urine	USA: St. Louis	2021
339	GCA_031869555.1	urine	USA: St. Louis	2021
340	GCA_031869715.1	Wound/Tissue/Ulcer	USA: St. Louis	2021
341	GCA_031869775.1	urine	USA: St. Louis	2021
342	GCA_031869795.1	Wound/Tissue/Ulcer	USA: St. Louis	2021
343	GCA_031869815.1	urine	USA: St. Louis	2021
344	GCA_031869895.1	urine	USA: St. Louis	2021
345	GCA_031869955.1	Wound/Tissue/Ulcer	USA: St. Louis	2021
346	GCA_031870015.1	urine	USA: St. Louis	2021
347	GCA_031870135.1	urine	USA: St. Louis	2021
348	GCA_031870255.1	urine	USA: St. Louis	2021
349	GCA_031870275.1	bone	USA: St. Louis	2021
350	GCA_031870315.1	urine	USA: St. Louis	2021
351	GCA_031870355.1	urine	USA: St. Louis	2021
352	GCA_031870415.1	urine	USA: St. Louis	2021
353	GCA_031870475.1	urine	USA: St. Louis	2021
354	GCA_031870535.1	urine	USA: St. Louis	2021
355	GCA_031870715.1	urine	USA: St. Louis	2021
356	GCA_031870775.1	urine	USA: St. Louis	2021
357	GCA_031870815.1	urine	USA: St. Louis	2021
358	GCA_031870925.1	Wound/Tissue/Ulcer	USA: St. Louis	2021
359	GCA_031870995.1	urine	USA: St. Louis	2021
360	GCA_031871075.1	urine	USA: St. Louis	2021
361	GCA_031871135.1	urine	USA: St. Louis	2021
362	GCA_031871155.1	urine	USA: St. Louis	2021
363	GCA_031871195.1	urine	USA: St. Louis	2021
364	GCA_031871215.1	urine	USA: St. Louis	2021
365	GCA_031871255.1	urine	USA: St. Louis	2021
366	GCA_031871275.1	Wound/Tissue/Ulcer	USA: St. Louis	2021
367	GCA_031871325.1	Wound/Tissue/Ulcer	USA: St. Louis	2021
368	GCA_031871355.1	urine	USA: St. Louis	2021
369	GCA_031871415.1	urine	USA: St. Louis	2021
370	GCA_031871435.1	urine	USA: St. Louis	2021
371	GCA_031871475.1	Wound/Tissue/Ulcer	USA: St. Louis	2021
372	GCA_031871495.1	urine	USA: St. Louis	2021
373	GCA_031871615.1	urine	USA: St. Louis	2021
374	GCA_031871675.1	urine	USA: St. Louis	2021
375	GCA_031871815.1	urine	USA: St. Louis	2021
376	GCA_031872035.1	urine	USA: St. Louis	2021
377	GCA_031872055.1	urine	USA: St. Louis	2021
378	GCA_031872135.1	urine	USA: St. Louis	2021
379	GCA_031872195.1	urine	USA: St. Louis	2021
380	GCA_031872215.1	urine	USA: St. Louis	2021
381	GCA_031872255.1	urine	USA: St. Louis	2021
382	GCA_031872635.1	urine	USA: St. Louis	2021
383	GCA_031872655.1	urine	USA: St. Louis	2021
384	GCA_031872735.1	Wound/Tissue/Ulcer	USA: St. Louis	2021
385	GCA_031872755.1	urine	USA: St. Louis	2021
386	GCA_031872835.1	urine	USA: St. Louis	2021
387	GCA_031872865.1	urine	USA: St. Louis	2021
388	GCA_031872895.1	urine	USA: St. Louis	2021
389	GCA_031873215.1	urine	USA: New York City	2021
390	GCA_031873275.1	urine	USA: New York City	2021
391	GCA_031873295.1	urine	USA: New York City	2021
392	GCA_031873315.1	Wound/Tissue/Ulcer	USA: New York City	2021
393	GCA_031873335.1	Wound/Tissue/Ulcer	USA: New York City	2021
394	GCA_031873375.1	blood	USA: New York City	2021
395	GCA_031873415.1	blood	USA: New York City	2021
396	GCA_031873455.1	blood	USA: New York City	2021
397	GCA_031873645.1	blood	USA: New York City	2021
398	GCA_031873745.1	blood	USA: New York City	2021
399	GCA_031873765.1	blood	USA: New York City	2021
400	GCA_031873805.1	blood	USA: New York City	2021
401	GCA_031874105.1	urine	USA: New York City	2021
402	GCA_031874165.1	urine	USA: New York City	2021
403	GCA_031874205.1	urine	USA: New York City	2021
404	GCA_031874225.1	urine	USA: New York City	2021
405	GCA_031874265.1	urine	USA: New York City	2021
406	GCA_031874285.1	urine	USA: New York City	2021
407	GCA_031874305.1	urine	USA: New York City	2021
408	GCA_031874345.1	urine	USA: New York City	2021
409	GCA_031874385.1	urine	USA: New York City	2021
410	GCA_031874405.1	urine	USA: New York City	2021
411	GCA_031874485.1	Wound/Tissue/Ulcer	USA: New York City	2021
412	GCA_031874565.1	Wound/Tissue/Ulcer	USA: Chicago	2021
413	GCA_031874605.1	Wound/Tissue/Ulcer	USA: Chicago	2021
414	GCA_031874645.1	Wound/Tissue/Ulcer	USA: Chicago	2021
415	GCA_031874745.1	Wound/Tissue/Ulcer	USA: Chicago	2021
416	GCA_031874805.1	Wound/Tissue/Ulcer	USA: Chicago	2021
417	GCA_031874925.1	Wound/Tissue/Ulcer	USA: Chicago	2021
418	GCA_031874965.1	urine	USA: Chicago	2021
419	GCA_031875045.1	urine	USA: Chicago	2021
420	GCA_031875085.1	urine	USA: Chicago	2021
421	GCA_031875105.1	urine	USA: Chicago	2021
422	GCA_031875225.1	urine	USA: St. Louis	2021
423	GCA_032440565.2	urine	USA	2023
424	GCA_032440585.2	Wound abscess	USA	2023
425	GCA_032602835.2	Wound, Sacral	USA	2023
426	GCA_032671565.1	blood	Lebanon: Byblos	2023
427	GCA_033028325.2	Unknown	USA	2021
428	GCA_033028585.2	Unknown	USA	2021
429	GCA_033144955.2	Unknown	USA	2023
430	GCA_033170405.1	urine	China:Hangzhou	2019
431	GCA_033170425.1	sputum	China:Hangzhou	2022
432	GCA_033170445.1	sputum	China:Hangzhou	2022
433	GCA_033170575.1	urine	China:Hangzhou	2023
434	GCA_033264065.2	urine	USA	2023
435	GCA_033725635.1	Unknown	USA	2023
436	GCA_033920985.1	urine	USA: Pittsburgh, Pennsylvania	2022
437	GCA_033921145.1	urine	USA: Pittsburgh, Pennsylvania	2023
438	GCA_033921165.1	wound	USA: Pittsburgh, Pennsylvania	2023
439	GCA_033921305.1	urine	USA: Pittsburgh, Pennsylvania	2023
440	GCA_033921705.1	wound	USA: Pittsburgh, Pennsylvania	2023
441	GCA_033922325.1	urine	USA: Pittsburgh, Pennsylvania	2023
442	GCA_033922385.1	urine	USA: Pittsburgh, Pennsylvania	2023
443	GCA_033922705.1	urine	USA: Pittsburgh, Pennsylvania	2023
444	GCA_033924765.1	urine	USA: Pittsburgh, Pennsylvania	2022
445	GCA_033924785.1	urine	USA: Pittsburgh, Pennsylvania	2022
446	GCA_033924805.1	urine	USA: Pittsburgh, Pennsylvania	2022
447	GCA_033924945.1	urine	USA: Pittsburgh, Pennsylvania	2022
448	GCA_033925165.1	sputum	USA: Pittsburgh, Pennsylvania	2022
449	GCA_033925205.1	wound	USA: Pittsburgh, Pennsylvania	2022
450	GCA_033925445.1	sputum	USA: Pittsburgh, Pennsylvania	2023
451	GCA_033925685.1	urine	USA: Pittsburgh, Pennsylvania	2023
452	GCA_033925745.1	urine	USA: Pittsburgh, Pennsylvania	2023
453	GCA_033925985.1	urine	USA: Pittsburgh, Pennsylvania	2023
454	GCA_033926185.1	sputum	USA: Pittsburgh, Pennsylvania	2023
455	GCA_033926245.1	urine	USA: Pittsburgh, Pennsylvania	2023
456	GCA_033926945.1	urine	USA: Pittsburgh, Pennsylvania	2023
457	GCA_033927005.1	urine	USA: Pittsburgh, Pennsylvania	2023
458	GCA_033927785.1	sputum	USA: Pittsburgh, Pennsylvania	2022
459	GCA_033927885.1	sputum	USA: Pittsburgh, Pennsylvania	2022
460	GCA_033927905.1	wound	USA: Pittsburgh, Pennsylvania	2022
461	GCA_033927965.1	wound	USA: Pittsburgh, Pennsylvania	2022
462	GCA_033928085.1	urine	USA: Pittsburgh, Pennsylvania	2022
463	GCA_033928125.1	wound	USA: Pittsburgh, Pennsylvania	2022
464	GCA_033928365.1	urine	USA: Pittsburgh, Pennsylvania	2022
465	GCA_033928505.1	Sinus	USA: Pittsburgh, Pennsylvania	2022
466	GCA_033930945.1	Tissue	USA: Pittsburgh, Pennsylvania	2022
467	GCA_033930985.1	blood	USA: Pittsburgh, Pennsylvania	2022
468	GCA_033931085.1	urine	USA: Pittsburgh, Pennsylvania	2022
469	GCA_033931145.1	urine	USA: Pittsburgh, Pennsylvania	2022
470	GCA_033931205.1	blood	USA: Pittsburgh, Pennsylvania	2022
471	GCA_033931385.1	Tissue	USA: Pittsburgh, Pennsylvania	2022
472	GCA_033931665.1	urine	USA: Pittsburgh, Pennsylvania	2022
473	GCA_033931745.1	urine	USA: Pittsburgh, Pennsylvania	2022
474	GCA_033931865.1	urine	USA: Pittsburgh, Pennsylvania	2022
475	GCA_033932005.1	blood	USA: Pittsburgh, Pennsylvania	2022
476	GCA_033932065.1	wound	USA: Pittsburgh, Pennsylvania	2022
477	GCA_033932445.1	sputum	USA: Pittsburgh, Pennsylvania	2022
478	GCA_033933825.1	urine	USA: Pittsburgh, Pennsylvania	2021
479	GCA_033933945.1	Tissue	USA: Pittsburgh, Pennsylvania	2021
480	GCA_033934045.1	wound	USA: Pittsburgh, Pennsylvania	2021
481	GCA_033934105.1	blood	USA: Pittsburgh, Pennsylvania	2022
482	GCA_033934125.1	urine	USA: Pittsburgh, Pennsylvania	2022
483	GCA_033934165.1	urine	USA: Pittsburgh, Pennsylvania	2022
484	GCA_033934325.1	sputum	USA: Pittsburgh, Pennsylvania	2022
485	GCA_033934445.1	sputum	USA: Pittsburgh, Pennsylvania	2022
486	GCA_033934545.1	urine	USA: Pittsburgh, Pennsylvania	2022
487	GCA_033934865.1	urine	USA: Pittsburgh, Pennsylvania	2022
488	GCA_033935105.1	urine	USA: Pittsburgh, Pennsylvania	2022
489	GCA_033936345.1	urine	USA: Pittsburgh, Pennsylvania	2023
490	GCA_033936465.1	wound	USA: Pittsburgh, Pennsylvania	2023
491	GCA_033936685.1	urine	USA: Pittsburgh, Pennsylvania	2023
492	GCA_033937245.1	wound	USA: Pittsburgh, Pennsylvania	2023
493	GCA_034262895.1	urine	USA	2023
494	GCA_034263115.1	urine	USA: Santa Clara County, CA	2023
495	GCA_034311025.1	urine	USA: Pittsburgh, Pennsylvania	2022
496	GCA_034311045.1	not collected	USA: Pittsburgh, Pennsylvania	2022
497	GCA_034318925.1	bronchoalveolar lavage	USA: California, Los Angeles County	2023
498	GCA_034330965.2	urine	USA	2023
499	GCA_034473025.1	clinical	USA: Wyoming	2023
500	GCA_034506575.1	rectal swab	USA	2023
501	GCA_034506845.1	urine	USA	2023
502	GCA_034930765.1	urine	USA	2023
503	GCA_035597315.1	urine	USA	2023
504	GCA_035919645.1	blood	China: zhuhai, Guangdong	2023
505	GCA_035989225.1	wound infection	Egypt: Cairo	2021
506	GCA_036238075.1	Unknown	USA	2023
507	GCA_036604195.1	sputum	China:Guangdong,zhuhai	2022
508	GCA_036623155.1	urine	USA	2023
509	GCA_036871035.1	physical	China: Shandong	2020
510	GCA_038051675.1	Unknown	Germany	2020
511	GCA_039409835.1	Unknown	Thailand	2022
512	GCA_039728795.1	Unknown	Switzerland	2023
513	S12_R8	CSF	India: Chattisgarh	2020

## Sheet: S7h
Table S7h: Metadata of clinical M. morganii isolates from NCBI database
S. No.	Assembly	Sample source	Location	Year of collection
1	GCA_016939575.1	urine (permanent catheter)	Czech Republic: Hradec Krlov	2019
2	GCA_016939635.1	sputum-aspirate	Czech Republic: Praha	2019
3	GCA_018474525.1	urine	China:Zhengzhou	2019
4	GCA_018474545.1	urine	China:Zhengzhou	2019
5	GCA_021810255.2	leg	USA	2020
6	GCA_023203295.3	Rectal Swab	USA	2022
7	GCA_024107895.3	Rectal Swab	USA	2022
8	GCA_025028635.3	urine	USA	2022
9	GCA_025932355.3	Foot	USA	2022
10	GCA_026298875.1	urine	Turkey	2020
11	GCA_026298995.1	urine	Paraguay	2020
12	GCA_026319995.1	swab (wound)	Cyprus	2020
13	GCA_026323455.1	feces	Canada	2020
14	GCA_026326015.1	swab (wound)	Nigeria	2020
15	GCA_026327935.1	urine	New Zealand	2020
16	GCA_026328575.1	blood	Mozambique	2020
17	GCA_026330455.1	sputum	Pakistan	2020
18	GCA_026334155.1	urine	Italy	2020
19	GCA_026334495.1	swab (superficial and non-surgical)	Ghana	2020
20	GCA_026335835.1	urine	Germany	2020
21	GCA_026345335.1	swab (wound)	Czech Republic	2020
22	GCA_026345655.1	swab (cavity)	Bulgaria	2020
23	GCA_026350955.1	blood	Spain	2020
24	GCA_026355635.1	urine	Australia	2020
25	GCA_026361035.1	unspecified diagnostic sample	Algeria	2020
26	GCA_028061075.3	wound	USA	2022
27	GCA_028367355.3	Urine, Catheter	USA	2023
28	GCA_028461745.1	Unknown	USA	2022
29	GCA_028546535.3	urine	USA	2022
30	GCA_028867915.1	blood	USA: Missouri, Town and Country	2021
31	GCA_029735795.1	wound	USA	2023
32	GCA_029886085.1	urine from catheter	Japan:Aichi	2019
33	GCA_030177045.1	anorectal swab	Germany:Muenster	2022
34	GCA_030370735.1	Unknown	China	2023
35	GCA_030411305.1	clinical	USA: Pittsburgh	2022
36	GCA_030719485.1	wound	Japan:Osaka	2020
37	GCA_030719505.1	ascites	Japan:Osaka	2019
38	GCA_030719545.1	urine	Japan:Osaka	2019
39	GCA_030793305.1	skin	Japan:Tokushima	2020
40	GCA_030793465.1	wound	Japan:Tokushima	2020
41	GCA_030796805.1	drained fluid	Japan:Osaka	2020
42	GCA_030813675.1	urine from catheter	Japan:Osaka	2020
43	GCA_030879925.1	sputum	Japan:Yamagata	2019
44	GCA_030883385.1	pus	Japan:Hokkaido	2019
45	GCA_031105005.2	Rectal	USA:Boston	2022
46	GCA_031115135.2	Wound/Abscess	USA	2023
47	GCA_031138975.2	urine	USA	2021
48	GCA_031139475.2	urine	USA	2019
49	GCA_031154625.1	bile	Japan:Yamagata	2020
50	GCA_031154845.1	body fluid	Japan:Tokushima	2019
51	GCA_031154865.1	urine	Japan:Gifu	2019
52	GCA_031154885.1	vaginal secretion	Japan:Hokkaido	2019
53	GCA_031154925.1	urine	Japan:Hokkaido	2019
54	GCA_031154945.1	urine	Japan:Osaka	2020
55	GCA_031169715.1	urine	Japan:Akita	2020
56	GCA_031169755.1	urine	Japan:Hokkaido	2019
57	GCA_031190015.1	urine	USA	2023
58	GCA_031630335.1	Other clinical sources	Brazil: Sao Paulo	2019
59	GCA_031630375.1	Other clinical sources	Brazil: Itapecirica da Serra	2021
60	GCA_031636435.2	wound	USA	2023
61	GCA_032150105.1	Unknown	USA	2023
62	GCA_032627525.2	Unknown	USA	2023
63	GCA_032671725.1	blood	Lebanon: Byblos	2023
64	GCA_033131675.2	urine	USA	2023
65	GCA_033551995.1	feces	Colombia: Medelln	2022
66	GCA_033552095.1	feces	Colombia: Medelln	2022
67	GCA_033725695.1	Unknown	USA	2023
68	GCA_033947325.1	blood	USA	2023
69	GCA_034258555.1	blood sample	China	2020
70	GCA_034654395.1	Respiratory tract sample	China	2021
71	GCA_034654455.1	Urinary tract sample	China	2021
72	GCA_034654495.1	Abdominal cavity sample	China	2021
73	GCA_034654515.1	blood sample	China	2021
74	GCA_034654535.1	Urinary tract sample	China	2021
75	GCA_034654555.1	Skin and soft sample	China	2021
76	GCA_034654615.1	Urinary tract sample	China	2021
77	GCA_034654635.1	Urinary tract sample	China	2021
78	GCA_034654735.1	Abdominal cavity sample	China	2021
79	GCA_034654775.1	Urinary tract sample	China	2021
80	GCA_034654815.1	Urinary tract sample	China	2021
81	GCA_034654835.1	Urinary tract sample	China	2021
82	GCA_034654855.1	Urinary tract sample	China	2021
83	GCA_034654895.1	blood sample	China	2021
84	GCA_034654915.1	Urinary tract sample	China	2021
85	GCA_034654935.1	Other sample	China	2021
86	GCA_034654955.1	Other sample	China	2021
87	GCA_034654995.1	Urinary tract sample	China	2021
88	GCA_034655035.1	Abdominal cavity sample	China	2021
89	GCA_034655115.1	Urinary tract sample	China	2021
90	GCA_034655175.1	Other sample	China	2021
91	GCA_034655195.1	Genital tract sample	China	2021
92	GCA_034655235.1	blood sample	China	2021
93	GCA_034655335.1	Urinary tract sample	China	2021
94	GCA_034655355.1	Urinary tract sample	China	2021
95	GCA_034655375.1	Other sample	China	2021
96	GCA_034655435.1	Urinary tract sample	China	2021
97	GCA_034655475.1	Genital tract sample	China	2021
98	GCA_034655495.1	Skin and soft sample	China	2021
99	GCA_034655535.1	blood sample	China	2021
100	GCA_034655615.1	Skin and soft sample	China	2021
101	GCA_034655655.1	Genital tract sample	China	2021
102	GCA_034655675.1	Skin and soft sample	China	2021
103	GCA_034655715.1	Urinary tract sample	China	2021
104	GCA_034655735.1	blood sample	China	2021
105	GCA_034655755.1	Genital tract sample	China	2021
106	GCA_034655775.1	Respiratory tract sample	China	2021
107	GCA_034655815.1	Skin and soft sample	China	2021
108	GCA_034655855.1	Skin and soft sample	China	2021
109	GCA_034655905.1	Skin and soft sample	China	2021
110	GCA_034655935.1	Respiratory tract sample	China	2021
111	GCA_034655955.1	Urinary tract sample	China	2021
112	GCA_034655995.1	Skin and soft sample	China	2021
113	GCA_034656015.1	Skin and soft sample	China	2021
114	GCA_034656055.1	Urinary tract sample	China	2021
115	GCA_034656075.1	Other sample	China	2021
116	GCA_034656155.1	blood sample	China	2021
117	GCA_034656175.1	Urinary tract sample	China	2021
118	GCA_034656195.1	Respiratory tract sample	China	2021
119	GCA_034656235.1	Urinary tract sample	China	2021
120	GCA_034656245.1	Skin and soft sample	China	2021
121	GCA_034656295.1	blood sample	China	2021
122	GCA_034656315.1	Urinary tract sample	China	2021
123	GCA_034656355.1	Respiratory tract sample	China	2021
124	GCA_034656375.1	Respiratory tract sample	China	2021
125	GCA_034656395.1	Other sample	China	2021
126	GCA_034656415.1	blood sample	China	2021
127	GCA_034656435.1	Urinary tract sample	China	2021
128	GCA_034656515.1	Urinary tract sample	China	2021
129	GCA_034656535.1	Abdominal cavity sample	China	2021
130	GCA_034656555.1	Skin and soft sample	China	2021
131	GCA_034656575.1	Urinary tract sample	China	2021
132	GCA_034656635.1	Skin and soft sample	China	2021
133	GCA_034656655.1	Skin and soft sample	China	2021
134	GCA_034656675.1	Skin and soft sample	China	2021
135	GCA_034656715.1	Urinary tract sample	China	2021
136	GCA_034656795.1	Respiratory tract sample	China	2021
137	GCA_034656815.1	Skin and soft sample	China	2021
138	GCA_034656835.1	Respiratory tract sample	China	2021
139	GCA_034656915.1	Skin and soft sample	China	2021
140	GCA_034656955.1	Genital tract sample	China	2021
141	GCA_034657015.1	Abdominal cavity sample	China	2021
142	GCA_034657035.1	blood sample	China	2020
143	GCA_034657055.1	Urinary tract sample	China	2020
144	GCA_034657155.1	blood sample	China	2020
145	GCA_034657175.1	Abdominal cavity sample	China	2020
146	GCA_034657235.1	Urinary tract sample	China	2020
147	GCA_034657295.1	Urinary tract sample	China	2020
148	GCA_034657335.1	Gastrointestinal tract sample	China	2020
149	GCA_034657355.1	Gastrointestinal tract sample	China	2020
150	GCA_034657435.1	Genital tract sample	China	2020
151	GCA_034657475.1	Respiratory tract sample	China	2020
152	GCA_034657495.1	Urinary tract sample	China	2020
153	GCA_034657535.1	Genital tract sample	China	2020
154	GCA_034657595.1	Abdominal cavity sample	China	2020
155	GCA_034657635.1	Skin and soft sample	China	2020
156	GCA_034657655.1	Gastrointestinal tract sample	China	2020
157	GCA_034657695.1	Skin and soft sample	China	2020
158	GCA_034657715.1	Urinary tract sample	China	2020
159	GCA_034657755.1	Urinary tract sample	China	2020
160	GCA_034657795.1	Genital tract sample	China	2020
161	GCA_034657815.1	Genital tract sample	China	2020
162	GCA_034657835.1	Respiratory tract sample	China	2020
163	GCA_034657855.1	blood sample	China	2020
164	GCA_034657895.1	Abdominal cavity sample	China	2020
165	GCA_034657915.1	Skin and soft sample	China	2020
166	GCA_034658025.1	blood sample	China	2020
167	GCA_034658055.1	Respiratory tract sample	China	2020
168	GCA_034658075.1	Urinary tract sample	China	2020
169	GCA_034658095.1	Genital tract sample	China	2020
170	GCA_034658115.1	Genital tract sample	China	2020
171	GCA_034658135.1	Gastrointestinal tract sample	China	2020
172	GCA_034658155.1	Urinary tract sample	China	2020
173	GCA_034658165.1	Genital tract sample	China	2020
174	GCA_034658195.1	Urinary tract sample	China	2020
175	GCA_034658235.1	Respiratory tract sample	China	2020
176	GCA_034658255.1	Genital tract sample	China	2020
177	GCA_034658295.1	Urinary tract sample	China	2020
178	GCA_034658315.1	Skin and soft sample	China	2020
179	GCA_034658455.1	Respiratory tract sample	China	2020
180	GCA_034658495.1	Genital tract sample	China	2020
181	GCA_034658515.1	Urinary tract sample	China	2020
182	GCA_035383705.1	Homo Sapiens clinical	USA: Florida	2023
183	GCA_035600275.1	Abscess	USA	2023
184	GCA_036622895.1	urine	USA	2023
185	GCA_036763685.1	wound	Bulgaria:Sofia	2023
186	GCA_039097885.1	Unknown	France	2021
187	GCA_039097935.1	Unknown	France	2021
188	GCA_039102265.1	Unknown	France	2021
189	GCA_039102355.1	Unknown	France	2021
190	GCA_039102365.1	Unknown	France	2020
191	GCA_039102585.1	Unknown	France	2020
192	GCA_039102675.1	Unknown	France	2020
193	GCA_039102745.1	Unknown	France	2020
194	GCA_039102935.1	Unknown	France	2019
195	R35_S23	Pleural fluid	India	2022
196	R35_S25	Pleural fluid	India	2022

## Sheet: S7i
Table S7i: Metadata of clinical P. rettgeri isolates from NCBI database
S. No.	Assembly	Sample source	Location	Year of collection
1	GCA_000158055.1	unknown	unknown	Unknown
2	GCA_006351125.1	urine	China: Sichuan	2019
3	GCA_015938005.4	Urine specimen obtained by clean catch procedure	USA	2019
4	GCA_016237225.1	not collected	USA: Pittsburgh, Pennsylvania	2019
5	GCA_016237275.1	wound	USA: Pittsburgh, Pennsylvania	2019
6	GCA_016512695.1	blood	USA	2020
7	GCA_017142935.4	Sputum specimen	USA	2020
8	GCA_018066445.1	Right ear drainage	USA	2021
9	GCA_018067465.1	urine	USA	2020
10	GCA_018067475.1	wound	USA	2020
11	GCA_018067565.1	nephrostomy R	USA	2020
12	GCA_018067585.1	nephrostomy L	USA	2020
13	GCA_018067605.1	Wound, foot	USA	2020
14	GCA_018067645.1	Wound, foot	USA	2020
15	GCA_018067765.1	urine	USA	2020
16	GCA_018067805.1	Wound, Abscess	USA	2020
17	GCA_018067825.1	urine	USA	2020
18	GCA_018067865.1	Other, Pelvis Drainage	USA	2020
19	GCA_018067875.1	urine	USA	2020
20	GCA_018068045.1	urine	USA	2020
21	GCA_018068205.1	urine	USA	2020
22	GCA_018068585.1	Other, Bone Rt. Fibula	USA	2019
23	GCA_018068865.1	urine	USA	2019
24	GCA_018069225.1	urine	USA	2019
25	GCA_018069385.1	wound	USA	2019
26	GCA_018421375.1	urine	Germany	2019
27	GCA_018453955.4	unknown	USA	2021
28	GCA_018454545.4	unknown	USA	2021
29	GCA_018476845.1	urine; cystoscopy	USA	2021
30	GCA_018771265.1	unknown	China:Ningbo	2019
31	GCA_019334195.1	foot wound	USA	2021
32	GCA_019334285.1	urine	USA	2021
33	GCA_019678955.4	wound	USA	2021
34	GCA_019729495.1	Bacterial isolate specimen	USA	2021
35	GCA_020523685.1	urine	USA	2021
36	GCA_020523725.1	urine	USA	2021
37	GCA_020523735.1	wound; arm	USA	2021
38	GCA_020523785.1	urine	USA	2021
39	GCA_020558335.1	Rectal Swab	USA	2021
40	GCA_020677085.1	Bacterial isolate specimen	USA	2019
41	GCA_020677225.4	Bacterial isolate specimen	USA	2019
42	GCA_020679665.2	urine	USA	2019
43	GCA_020679685.2	urine	USA	2020
44	GCA_020680385.3	wound	USA	2019
45	GCA_020680465.3	wound	USA	2021
46	GCA_020680525.3	blood	USA	2021
47	GCA_020681165.3	urine	USA	2019
48	GCA_020899235.2	urine	USA	2021
49	GCA_021027775.4	Urine specimen obtained by clean catch procedure	USA	2021
50	GCA_021106375.4	unknown	USA	2021
51	GCA_021107115.4	unknown	USA	2021
52	GCA_021686655.4	urine	USA	2021
53	GCA_021752805.1	Ulcer, Decubitius	USA	2021
54	GCA_021868895.2	urine	USA	2019
55	GCA_021868975.2	urine	USA	2019
56	GCA_021869825.1	urine	Colombia: Bogota	2019
57	GCA_022253475.2	urine	USA	2021
58	GCA_022253495.2	urine	USA	2021
59	GCA_022253515.2	Left Big Toe Wound	USA	2021
60	GCA_022349865.2	urine	USA	2019
61	GCA_022349885.2	urine	USA	2020
62	GCA_022474395.4	urine	USA	2021
63	GCA_022685965.2	urine	USA	2022
64	GCA_023184555.1	urine	USA: Arkansas	2021
65	GCA_023205015.1	cerebrospinal fluid	China	2020
66	GCA_024188075.4	urine	USA	2022
67	GCA_024196265.4	urine	USA	2022
68	GCA_024273495.1	clinical material	Israel	2019
69	GCA_024483905.4	urine	USA	2022
70	GCA_024507715.4	wound; left foot skin	USA	2022
71	GCA_024560805.4	Urine Culture	USA	2021
72	GCA_024830765.4	urine	USA	2022
73	GCA_025310355.4	Thigh, Left	USA	2022
74	GCA_025579105.4	Wound/Abscess	USA	2022
75	GCA_026345195.1	blood	Czech Republic	2020
76	GCA_026627745.1	urine	USA	2022
77	GCA_028057375.4	urine	USA	2022
78	GCA_028061175.4	urine	USA	2021
79	GCA_028063515.4	wound	USA	2021
80	GCA_028065015.4	urine	USA	2020
81	GCA_028068215.4	urine	USA	2020
82	GCA_028762045.4	urine	USA	2023
83	GCA_028886085.4	urine	USA	2023
84	GCA_029846495.1	secretion	China: Shandong	2021
85	GCA_029846505.1	secretion	China: Shandong	2021
86	GCA_029846535.1	urine	China: Shandong	2020
87	GCA_029846555.1	secretion	China: Shandong	2020
88	GCA_029846595.1	blood	China: Shandong	2020
89	GCA_029846605.1	sputum	China: Shandong	2021
90	GCA_030023845.1	urine	USA	2023
91	GCA_030164765.1	urine	USA	2023
92	GCA_030164805.1	urine	USA	2023
93	GCA_030315815.1	urine	China: Zhejiang	2022
94	GCA_030315935.1	urine	China: Zhejiang	2022
95	GCA_031098035.2	TISSUE - RIGHT FOOT	USA	2023
96	GCA_031108635.3	Specimen from wound	USA	2023
97	GCA_031116235.3	Urine specimen obtained by clean catch procedure	USA	2023
98	GCA_031132275.3	Urine specimen	USA	2023
99	GCA_031132855.3	wound	USA	2023
100	GCA_031138095.3	urine	USA	2022
101	GCA_031138215.3	urine	USA	2022
102	GCA_031138315.3	sputum	USA	2022
103	GCA_031138595.2	urine	USA	2023
104	GCA_031340675.2	catheter	Japan:Hokkaido	2019
105	GCA_031342415.2	urine	Japan:Hiroshima	2019
106	GCA_031582685.1	swab; Right ear	USA	2023
107	GCA_031641515.2	Rectal Swab	USA	2023
108	GCA_031902925.2	urine	USA	2023
109	GCA_032498485.2	urine	USA	2023
110	GCA_032604705.2	urine	USA	2023
111	GCA_033028225.2	unknown	USA	2021
112	GCA_033193295.2	urine	USA	2023
113	GCA_034043895.1	urine	USA	2023
114	GCA_034300175.1	wound	USA: Pittsburgh, Pennsylvania	2022
115	GCA_034300215.1	urine	USA: Pittsburgh, Pennsylvania	2022
116	GCA_034300335.1	not collected	USA: Pittsburgh, Pennsylvania	2022
117	GCA_034300395.1	Tissue	USA: Pittsburgh, Pennsylvania	2022
118	GCA_034301835.1	Tissue	USA: Pittsburgh, Pennsylvania	2022
119	GCA_034304035.1	urine	USA: Pittsburgh, Pennsylvania	2023
120	GCA_034307405.1	urine	USA: Pittsburgh, Pennsylvania	2023
121	GCA_034307485.1	urine	USA: Pittsburgh, Pennsylvania	2023
122	GCA_034307545.1	wound	USA: Pittsburgh, Pennsylvania	2023
123	GCA_034307965.1	urine	USA: Pittsburgh, Pennsylvania	2023
124	GCA_034330845.2	Wound/Abscess	USA	2023
125	GCA_034331345.1	unknown	USA	2023
126	GCA_034466565.1	wound	USA	2023
127	GCA_034684965.1	urine from catheter	Japan:Kanagawa	2019
128	GCA_034706655.1	Bacterial isolate, other	USA	2023
129	GCA_035516695.1	unknown	USA	2023
130	GCA_038442735.1	catheter	China:Beijing	2022
131	GCA_038473065.1	urine	USA	2022
132	GCA_038737575.1	unknown	USA: Maywood, IL	2020

## Sheet:  S7j
Table S7j: Metadata of clinical C. werkmanii isolates from NCBI database
S. No.	Assembly	Sample source	Location	Year of collection
1	GCA_002114305.1	urine	India:New Delhi	2014
2	GCA_002185305.2	blood	USA: Unknown	2014
3	GCA_004146135.1	patient	France	2017
4	GCA_009907085.1	urine	Nigeria	2015
5	GCA_013336965.1	bronchoalveolar lavage	USA: Pennsylvania, Pittsburgh	2014
6	GCA_015958865.1	BAL	USA: Pittsburgh, Pennsylvania	2017
7	GCA_015958985.1	Pelvic abscess	USA: Pittsburgh, Pennsylvania	2015
8	GCA_016505055.1	not collected	USA: Pittsburgh, Pennsylvania	2017
9	GCA_018106145.1	tissue from diabetec foot ulcer	Malaysia: Johor	2015
10	GCA_018106165.1	peritoneal fluid	Malaysia: Johor	2016
11	GCA_018106185.1	slough from diabetec foot ulcer	Malaysia: Johor	2014
12	GCA_018106225.1	pus	Malaysia: Johor	2015
13	GCA_019731375.1	feces	China	2020
14	GCA_019731585.1	feces	China	2020
15	GCA_023685145.1	Rectal Swab	Australia:Queensland	2020
16	GCA_025033775.1	Unknown	Canada	2020
17	GCA_025972025.1	Unknown	Australia: Victoria	2018
18	GCA_025979325.1	Unknown	Australia: Victoria	2018
19	GCA_026348355.1	blood	Thailand	2020
20	GCA_031846145.1	Rectal Swab	USA	2023
21	GCA_032972285.1	stool/rectal swab	Canada: Ottawa	2018
22	GCA_033099695.1	stool	Bangladesh	2023
