# Supplementary material for: Antibiotic Contamination and AMR Dynamics in the Urban Sewage Microbiome: Insights from a Longitudinal surveillance
Source: Research Square preprint supplement (doi:10.21203/rs.3.rs-6137541/v1), 2025-03-12
Supplement: Supplementary file 8 [file c674a747185f4ae44b9cc1bd.xlsx]

## Sheet: S8a
Table S8a: MGEs associated with ARGs in sewage isolates
Sample	Contig	Start	End	ARG	Start	End	MGE
R87_S36_Proteus_mirabilis	NODE_2_length_285793_cov_15.098717	238676	239512	APH(6)-Id	230346 241498 234411	233557 242730 235387	ISShfr9 ISVch12 ISVsa3
	NODE_2_length_285793_cov_15.098717	239512	240315	APH(3'')-Ib	230346 241498 234411	233557 242730 235387	ISShfr9 ISVch12 ISVsa4
	NODE_2_length_285793_cov_15.098717	240376	241191	sul2	230346 241498 234411	233557 242730 235387	ISShfr9 ISVch12 ISVsa5
	NODE_8_length_231226_cov_14.266760	32977	33784	ANT(3'')-IIa	23094	37396	Tn7
	NODE_8_length_231226_cov_14.266760	33782	34255	dfrA1	23094	37396	Tn7
R87_S38_Proteus_mirabilis	NODE_16_length_83587_cov_10.014258	45364	46179	sul2	52998 43825 51168	56209 45057 52144	ISShfr9 ISVch12 ISVsa3
	NODE_16_length_83587_cov_10.014258	46240	47043	APH(3'')-Ib	52998 43825 51168	56209 45057 52144	ISShfr9 ISVch12 ISVsa3
	NODE_16_length_83587_cov_10.014258	47043	47879	APH(6)-Id	52998 43825 51168	56209 45057 52144	ISShfr9 ISVch12 ISVsa3
R87_S39_Providencia_sp	NODE_1_length_722232_cov_9.108493	27780	28421	catIII	26432	27689	ISVch4
R87_S45_Providencia_stuartii	NODE_28_length_20042_cov_5.758273	150	961	ANT(3'')-IIa	15100 13092 18633 2652	16381 14178 19452 3471	ISAba14 ISAba125 IS26 IS26
	NODE_28_length_20042_cov_5.758273	958	1758	OXA-10	15100 13092 18633 2652	16381 14178 19452 3471	ISAba14 ISAba125 IS26 IS26
	NODE_28_length_20042_cov_5.758273	2054	2506	arr-2	15100 13092 18633 2652	16381 14178 19452 3471	ISAba14 ISAba125 IS26 IS26
	NODE_28_length_20042_cov_5.758273	11817	12182	determinant_of_bleomycin_resistance	15100 13092 18633 2652	16381 14178 19452 3471	ISAba14 ISAba125 IS26 IS26
	NODE_28_length_20042_cov_5.758273	12186	12998	NDM-1	15100 13092 18633 2652	16381 14178 19452 3471	ISAba14 ISAba125 IS26 IS26
	NODE_28_length_20042_cov_5.758273	14276	15055	APH(3')-VI	15100 13092 18633 2652	16381 14178 19452 3471	ISAba14 ISAba125 IS26 IS26
	NODE_28_length_20042_cov_5.758273	19450	19908	dfrA14	15100 13092 18633 2652	16381 14178 19452 3471	ISAba14 ISAba125 IS26 IS26
	NODE_30_length_16070_cov_5.665809	2883	3767	mphE	5663 189 8626	6973 1245 9522	ISEc29 IS102 ISEc28
	NODE_30_length_16070_cov_5.665809	3823	5298	msrE	5663 189 8626	6973 1245 9522	ISEc29 IS102 ISEc28
	NODE_30_length_16070_cov_5.665809	11701	12540	sul1	5663 189 8626	6973 1245 9522	ISEc29 IS102 ISEc28
	NODE_30_length_16070_cov_5.665809	13585	14058	dfrA1	5663 189 8626	6973 1245 9522	ISEc29 IS102 ISEc28
	NODE_30_length_16070_cov_5.665809	14127	14660	ANT(2'')-Ia	5663 189 8626	6973 1245 9522	ISEc29 IS102 ISEc28
	NODE_30_length_16070_cov_5.665809	14730	15316	AAC(6')-Ib10	5663 189 8626	6973 1245 9522	ISEc29 IS102 ISEc28
R87_S47_Providencia_sp._2.29	NODE_1_length_732868_cov_7.511795	728850	729491	catIII	729582	730839	ISVch4
R87_S61_Morganella_morganii	NODE_21_length_71014_cov_8.179525	38244	39043	ANT(3'')-IIa	28361	42427	Tn7
	NODE_21_length_71014_cov_8.179525	39709	40182	dfrA1	28361	42427	Tn7
R87_S62_Morganella_morganii	NODE_1_length_758166_cov_9.387442	686029	686844	sul2	691833 683900	692809 685128	ISVsa3 ISEhe3
	NODE_1_length_758166_cov_9.387442	686905	687708	APH(3'')-Ib	691833 683900	692809 685128	ISVsa3 ISEhe3
	NODE_1_length_758166_cov_9.387442	687708	688544	APH(6)-Id	691833 683900	692809 685128	ISVsa3 ISEhe3
	NODE_3_length_439813_cov_9.544163	435927	437173	tet(A)	430046	433709	Tn5403
	NODE_5_length_266240_cov_9.571317	37454	38253	ANT(3'')-IIa	27571	41637	Tn7
	NODE_5_length_266240_cov_9.571317	38919	39392	dfrA1	27571	41637	Tn7
	NODE_7_length_184521_cov_9.471653	3458	4333	CTX-M-15	4382	6037	ISEc9
R87_S63_Morganella_morganii	NODE_20_length_71207_cov_9.065293	38437	39236	ANT(3'')-IIa	28554	42620	Tn7
	NODE_20_length_71207_cov_9.065293	39902	40375	dfrA1	28554	42620	Tn7
R87_S64_Proteus_mirabilis	NODE_2_length_288423_cov_13.660810	238738	239574	APH(6)-Id	230408 241560 234473	233619 242792 235449	ISShfr9 ISVch12 ISVsa3
	NODE_2_length_288423_cov_13.660810	239574	240377	APH(3'')-Ib	230408 241560 234473	233619 242792 235449	ISShfr9 ISVch12 ISVsa3
	NODE_2_length_288423_cov_13.660810	240438	241253	sul2	230408 241560 234473	233619 242792 235449	ISShfr9 ISVch12 ISVsa3
	NODE_6_length_226153_cov_13.227018	191899	192372	dfrA1	188758	203060	Tn7
	NODE_6_length_226153_cov_13.227018	192370	193177	ANT(3'')-IIa	188758	203060	Tn7
R87_S67_Providencia_manganoxydans	NODE_13_length_110541_cov_7.466580	98327	99106	APH(3')-VI	99204	100290	ISAba125
	NODE_13_length_110541_cov_7.466580	100384	101196	NDM-1	99204	100290	ISAba125
	NODE_13_length_110541_cov_7.466580	101200	101565	determinant_of_bleomycin_resistance	99204	100290	ISAba125
	NODE_13_length_110541_cov_7.466580	106863	107702	sul1	99204	100290	ISAba125
	NODE_2_length_294911_cov_7.899883	784	1257	dfrA1	2630	6276	Tn6196
R87_S68_Morganella_morganii	NODE_6_length_246876_cov_9.380585	2509	2961	arr-2	2	821	IS26
R87_S69_Providencia_stuartii	NODE_11_length_136527_cov_10.858226	63923	64810	Erm(42)	73371 71541	76582 72517	ISShfr9 ISVsa3
	NODE_11_length_136527_cov_10.858226	66580	67368	aadA27	73371 71541	76582 72517	ISShfr9 ISVsa3
	NODE_11_length_136527_cov_10.858226	68066	68881	sul2	73371 71541	76582 72517	ISShfr9 ISVsa3
	NODE_11_length_136527_cov_10.858226	70397	71281	mphG	73371 71541	76582 72517	ISShfr9 ISVsa3
R87_S70_Aeromonas_dhakensis	NODE_41_length_14020_cov_13.182178	13297	14020	APH(3'')-Ib	9573	13206	Tn6082
R87_S73_Providencia_rettgeri	NODE_23_length_52858_cov_8.213631	2108	3345	tet(A)	10054	13266	ISShfr9
	NODE_23_length_52858_cov_8.213631	7580	8383	APH(3'')-Ib	10054	13266	ISShfr9
	NODE_23_length_52858_cov_8.213631	8383	9219	APH(6)-Id	10054	13266	ISShfr9
	NODE_53_length_3654_cov_26.443720	22	906	mphE	2835	3654	IS26
	NODE_53_length_3654_cov_26.443720	962	2437	msrE	2835	3654	IS26
R87_S76_Providencia_rettgeri	NODE_25_length_53274_cov_8.931774	524	1999	msrE	4104	4982	ISSpu10
	NODE_25_length_53274_cov_8.931774	2055	2939	mphE	4104	4982	ISSpu10
	NODE_26_length_52858_cov_8.463143	43640	44476	APH(6)-Id	39593	42805	ISShfr9
	NODE_26_length_52858_cov_8.463143	44476	45279	APH(3'')-Ib	39593	42805	ISShfr9
	NODE_26_length_52858_cov_8.463143	49514	50751	tet(A)	39593	42805	ISShfr9
R87_S78_Escherichia_coli	NODE_58_length_8822_cov_4.317654	1155	1811	QnrS1	3087	5937	ISKpn19
	NODE_58_length_8822_cov_4.317654	7770	8567	OXA-484	3087	5937	ISKpn19
R87_S82_Morganella_morganii	NODE_1_length_517050_cov_6.097897	192112	193017	mphA	203217 195275 191223	206745 196154 192042	Tn6196 IS6100 IS26
	NODE_1_length_517050_cov_6.097897	198328	199167	sul1	203217 195275 191223	206745 196154 192042	Tn6196 IS6100 IS26
	NODE_1_length_517050_cov_6.097897	199672	200451	aadA2	203217 195275 191223	206745 196154 192042	Tn6196 IS6100 IS26
	NODE_1_length_517050_cov_6.097897	200871	201368	dfrA12	203217 195275 191223	206745 196154 192042	Tn6196 IS6100 IS26
R87_S85_Morganella_morganii	NODE_5_length_267096_cov_8.220284	226743	227216	dfrA1	224498	238564	Tn7
	NODE_5_length_267096_cov_8.220284	227882	228681	ANT(3'')-IIa	224498	238564	Tn7
	NODE_8_length_129372_cov_8.490851	128761	129234	dfrA7	127637	128404	ISSen9
R87_S87_Morganella_morganii	NODE_20_length_68566_cov_6.058636	28274	28747	dfrA1	26029	40095	Tn7
	NODE_20_length_68566_cov_6.058636	29413	30212	ANT(3'')-IIa	26029	40095	Tn7
	NODE_30_length_23572_cov_4.197867	2763	3638	CTX-M-15	3687	5342	ISEc9
R87_S93_Morganella_morganii	NODE_13_length_147130_cov_7.316143	106838	107311	dfrA1	104593	118659	Tn7
	NODE_13_length_147130_cov_7.316143	107977	108776	ANT(3'')-IIa	104593	118659	Tn7
	NODE_4_length_307385_cov_4.783609	304192	305067	CTX-M-15	302488	304143	ISEc9
R91_S62_Providencia_sp	NODE_29_length_46214_cov_16.862738	15721	16362	catIII	16509	17766	ISVch4
R91_S67_Providencia_sp	NODE_4_length_377894_cov_18.613632	107569	108210	catIII	106221	107478	ISVch4
R91_S70_Pseudomonas_putida	NODE_1_length_662963_cov_13.632491	238667	239470	APH(3'')-Ib	234943 250741	238576 251620	Tn6082 IS6100
	NODE_1_length_662963_cov_13.632491	239470	240306	APH(6)-Id	234943 250741	238576 251620	Tn6082 IS6100
	NODE_1_length_662963_cov_13.632491	242319	243565	tet(A)	234943 250741	238576 251620	Tn6082 IS6100
	NODE_1_length_662963_cov_13.632491	248830	249667	sul1	234943 250741	238576 251620	Tn6082 IS6100
R91_S71_Escherichia_coli	NODE_48_length_9804_cov_16.144983	814	1650	APH(6)-Id	5542	6304	ISEc30
	NODE_48_length_9804_cov_16.144983	1650	2453	APH(3'')-Ib	5542	6304	ISEc30
	NODE_48_length_9804_cov_16.144983	2514	3329	sul2	5542	6304	ISEc30
R91_S72_Escherichia_coli_all.fna	NODE_4_length_283170_cov_11.862724	273075	274214	DHA-1	271493 278804	273042 279683	ISEc13 IS6100
R91_S73_Citrobacter_freundii	NODE_14_length_13795_cov_18.308458	293	1153	TEM-1	1596	5229	Tn6082
	NODE_14_length_13795_cov_18.308458	6555	7358	APH(3'')-Ib	1596	5229	Tn6082
	NODE_14_length_13795_cov_18.308458	7358	8194	APH(6)-Id	1596	5229	Tn6082
	NODE_14_length_13795_cov_18.308458	11627	12873	tet(A)	1596	5229	Tn6082
R91_S74_Pseudomonas_putida	NODE_3_length_114113_cov_12.668214	111011	112257	tet(A)	93185	94800	ISPst3
R91_S76_Escherichia_coli	NODE_51_length_28921_cov_10.556574	265	1078	APH(3')-Ia	19169 1166	20225 1985	IS102 IS26
	NODE_51_length_28921_cov_10.556574	3848	4663	sul2	19169 1166	20225 1985	IS102 IS26
	NODE_51_length_28921_cov_10.556574	4724	5527	APH(3'')-Ib	19169 1166	20225 1985	IS102 IS26
	NODE_51_length_28921_cov_10.556574	5527	6363	APH(6)-Id	19169 1166	20225 1985	IS102 IS26
	NODE_51_length_28921_cov_10.556574	7610	8083	dfrA1	19169 1166	20225 1985	IS102 IS26
	NODE_51_length_28921_cov_10.556574	8166	8967	ANT(3'')-IIa	19169 1166	20225 1985	IS102 IS26
	NODE_51_length_28921_cov_10.556574	9472	10311	sul1	19169 1166	20225 1985	IS102 IS26
	NODE_83_length_10561_cov_11.963964	7059	7934	CTX-M-15	7983	9637	ISEc9
R91_S77_Escherichia_coli	NODE_12_length_159486_cov_17.237257	155180	156426	tet(A)	144824	147522	ISCro1
R91_S78_Morganella_morganii	NODE_34_length_7089_cov_18.144355	5312	5971	catI	1150 6195	4678 6962	Tn6196 ISSen9
R91_S79_Escherichia_coli	NODE_62_length_5524_cov_11.291273	3727	4383	QnrS1	128	2978	ISKpn19
R91_S80_Morganella_morganii	NODE_4_length_262614_cov_22.929958	223444	224243	ANT(3'')-IIa	220637	234126	Tn7
R91_S82_Morganella_morganii	NODE_11_length_26953_cov_9.937151	2765	3640	CTX-M-15	3689	5344	ISEc9
	NODE_1_length_1129526_cov_10.503488	2641	3887	tet(A)	6105 172127	9768 173355	Tn5403 ISEhe3
	NODE_7_length_138090_cov_11.201974	309	1148	sul1	4054 7812	7582 8579	Tn6196 ISSen9
	NODE_7_length_138090_cov_11.201974	1719	2192	dfrA7	4054 7812	7582 8579	Tn6196 ISSen9
R91_S83_Aeromonas_veronii	NODE_29_length_51815_cov_16.160714	340	996	QnrVC4	2711	3590	IS6100
	NODE_29_length_51815_cov_16.160714	1660	2142	dfrA14	2711	3590	IS6100
	NODE_29_length_51815_cov_16.160714	44843	45630	OXA-12	2711	3590	IS6100
	NODE_7_length_180531_cov_15.347110	176237	177076	sul1	166222 174584	174584 175910	Tn4671 IS5075
	NODE_7_length_180531_cov_15.347110	177581	178392	ANT(3'')-IIa	166222 174584	174584 175910	Tn4671 IS5075
	NODE_7_length_180531_cov_15.347110	178389	179189	OXA-10	166222 174584	174584 175910	Tn4671 IS5075
	NODE_7_length_180531_cov_15.347110	179829	180531	AAC(6')-Ib7	166222 174584	174584 175910	Tn4671 IS5075
R91_S84_Aeromonas_veronii	NODE_23_length_72274_cov_21.197375	340	996	QnrVC4	2711	3590	IS6100
	NODE_23_length_72274_cov_21.197375	1660	2142	dfrA14	2711	3590	IS6100
	NODE_23_length_72274_cov_21.197375	44843	45630	OXA-12	59648	60674	ISAeca5
R91_S90_Morganella_morganii	NODE_7_length_309424_cov_20.947326	269109	269582	dfrA1	266864	280930	Tn7
	NODE_7_length_309424_cov_20.947326	270248	271047	ANT(3'')-IIa	266864	280930	Tn7
R94_S101_Escherichia_coli	NODE_140_length_3864_cov_6.357238	1447	2250	APH(3'')-Ib	147	1378	IS1133
	NODE_140_length_3864_cov_6.357238	2250	3086	APH(6)-Id	147	1378	IS1133
R94_S104_Klebsiella_pneumoniae	NODE_108_length_6918_cov_3.050066	148	1008	TEM-1	1664	3280	ISCfr1
	NODE_108_length_6918_cov_3.050066	5980	6840	AAC(3)-IId	1664	3280	ISCfr1
	NODE_79_length_16833_cov_5.735065	6084	6581	dfrA12	1077 13852 11303	4723 15176 12199	Tn6196 ISEc29 ISEc28
	NODE_79_length_16833_cov_5.735065	7001	7780	aadA2	1077 13852 11303	4723 15176 12199	Tn6196 ISEc29 ISEc28
	NODE_79_length_16833_cov_5.735065	8285	9124	sul1	1077 13852 11303	4723 15176 12199	Tn6196 ISEc29 ISEc28
	NODE_79_length_16833_cov_5.735065	15541	16833	msrE	1077 13852 11303	4723 15176 12199	Tn6196 ISEc29 ISEc28
R94_S105_Escherichia_coli	NODE_37_length_43536_cov_9.396231	225	1028	APH(3'')-Ib	30120	31503	ISApu1
	NODE_37_length_43536_cov_9.396231	1089	1781	sul2	30120	31503	ISApu1
	NODE_37_length_43536_cov_9.396231	31824	33011	CMY-59	30120	31503	ISApu1
R94_S106_Escherichia_coli	NODE_63_length_17179_cov_7.801079	13341	14587	tet(A)	7460 1974	11123 3341	Tn5403 ISSm1
R94_S107_Pseudomonas_putida_2	NODE_163_length_6647_cov_2.903681	4187	5362	tet(G)	639	1789	ISStes1
	NODE_79_length_26812_cov_4.122766	7648	8451	APH(3'')-Ib	5069 1022	5948 2448	IS6100 ISAzvi3
	NODE_79_length_26812_cov_4.122766	8451	9287	APH(6)-Id	5069 1022	5948 2448	IS6100 ISAzvi3
	NODE_79_length_26812_cov_4.122766	13880	14764	mphE	5069 1022	5948 2448	IS6100 ISAzvi3
	NODE_79_length_26812_cov_4.122766	14820	16295	msrE	5069 1022	5948 2448	IS6100 ISAzvi3
R94_S109_Escherichia_coli	NODE_146_length_6282_cov_5.619171	5165	5980	APH(3')-Ia	1407 251	5040 1406	Tn6082 IS1133
	NODE_162_length_4884_cov_5.280849	502	1158	QnrS1	1907	4757	ISKpn19
R94_S110_Klebsiella_pneumoniae	NODE_34_length_26628_cov_3.979737	4462	5337	CTX-M-15	5386 12688	7041 14014	ISEc9 IS5075
	NODE_34_length_26628_cov_3.979737	8159	9019	TEM-1	5386 12688	7041 14014	ISEc9 IS5075
	NODE_34_length_26628_cov_3.979737	9740	10576	APH(6)-Id	5386 12688	7041 14014	ISEc9 IS5075
	NODE_34_length_26628_cov_3.979737	10576	11379	APH(3'')-Ib	5386 12688	7041 14014	ISEc9 IS5075
	NODE_34_length_26628_cov_3.979737	11440	12255	sul2	5386 12688	7041 14014	ISEc9 IS5075
R94_S111_Escherichia_coli	NODE_1_length_177368_cov_4.751457	20455	20929	mphB	37688 74380	38455 74498	ISSen9 MITEEc1
	NODE_29_length_48459_cov_4.639040	39644	40445	ANT(3'')-IIa	43289	46817	Tn6196
	NODE_29_length_48459_cov_4.639040	40545	41375	OXA-1	43289	46817	Tn6196
	NODE_29_length_48459_cov_4.639040	47451	48110	catI	43289	46817	Tn6196
R94_S112_Escherichia_coli	NODE_124_length_11169_cov_3.027893	1142	1798	QnrS1	2547	5397	ISKpn19
	NODE_124_length_11169_cov_3.027893	6378	7624	tet(A)	2547	5397	ISKpn19
	NODE_127_length_10738_cov_3.352559	196	1098	mphA	3368	4247	IS6100
	NODE_127_length_10738_cov_3.352559	6421	7260	sul1	3368	4247	IS6100
	NODE_127_length_10738_cov_3.352559	7765	8544	aadA2	3368	4247	IS6100
	NODE_127_length_10738_cov_3.352559	8964	9461	dfrA12	3368	4247	IS6100
	NODE_145_length_6648_cov_3.525686	1	983	CMY-59	1058	2713	ISEc9
R94_S113_Escherichia_coli	NODE_100_length_11032_cov_3.323980	2385	3590	tet(B)	7472 4797	10904 6125	Tn6196 ISKpn72
	NODE_100_length_11032_cov_3.323980	6179	6838	catI	7472 4797	10904 6125	Tn6196 ISKpn72
	NODE_27_length_57150_cov_4.438876	1553	2428	CTX-M-55	1 3609	1504 3725	ISEc9 MITEYpe1
R94_S116_Escherichia_coli	NODE_169_length_6074_cov_5.178577	1447	2250	APH(3'')-Ib	147	1378	IS1133
	NODE_169_length_6074_cov_5.178577	2250	3086	APH(6)-Id	147	1378	IS1133
	NODE_169_length_6074_cov_5.178577	3935	4795	TEM-1	147	1378	IS1133
R94_S120_Proteus_vulgaris	NODE_1_length_150701_cov_11.814821	49198	50037	sul1	54854 46375 37129	58500 47646 38315	Tn6196 ISVsa5 ISYal1
	NODE_1_length_150701_cov_11.814821	50542	51353	ANT(3'')-IIa	54854 46375 37129	58500 47646 38315	Tn6196 ISVsa5 ISYal1
	NODE_1_length_150701_cov_11.814821	51350	52150	OXA-10	54854 46375 37129	58500 47646 38315	Tn6196 ISVsa5 ISYal1
	NODE_1_length_150701_cov_11.814821	52446	52898	arr-2	54854 46375 37129	58500 47646 38315	Tn6196 ISVsa5 ISYal1
	NODE_1_length_150701_cov_11.814821	53009	53491	dfrA14	54854 46375 37129	58500 47646 38315	Tn6196 ISVsa5 ISYal1
	NODE_1_length_150701_cov_11.814821	134578	135783	tet(B)	54854 46375 37129	58500 47646 38315	Tn6196 ISVsa5 ISYal1
R94_S121_Proteus_mirabilis	NODE_2_length_224058_cov_8.724714	51359	52555	tet(J)	79046	80352	ISKpn2
	NODE_57_length_6415_cov_10.451495	161	1021	AAC(3)-IId	3721	5338	ISCfr1
R94_S123_Proteus_mirabilis	NODE_21_length_81672_cov_10.393194	37853	39049	tet(J)	65540	66846	ISKpn2
R94_S136_Providencia_rettgeri	NODE_66_length_24408_cov_15.364977	12647	13486	sul1	9824 1072	11095 2267	ISVsa5 ISKpn26
	NODE_66_length_24408_cov_15.364977	15063	16202	DHA-1	9824 1072	11095 2267	ISVsa5 ISKpn26
	NODE_66_length_24408_cov_15.364977	19525	20336	ANT(3'')-IIa	9824 1072	11095 2267	ISVsa5 ISKpn26
	NODE_66_length_24408_cov_15.364977	20333	21133	OXA-10	9824 1072	11095 2267	ISVsa5 ISKpn26
	NODE_66_length_24408_cov_15.364977	21429	21881	arr-2	9824 1072	11095 2267	ISVsa5 ISKpn26
	NODE_66_length_24408_cov_15.364977	21992	22474	dfrA14	9824 1072	11095 2267	ISVsa5 ISKpn26
R94_S138_Klebsiella_pneumoniae	NODE_137_length_11842_cov_5.982160	6555	7037	dfrA14	7606	8485	IS6100
	NODE_137_length_11842_cov_5.982160	10743	11648	mphA	7606	8485	IS6100
R94_S139_Escherichia_coli	NODE_120_length_6157_cov_10.535489	550	1365	sul2	3180	6030	ISKpn19
	NODE_120_length_6157_cov_10.535489	1426	2229	APH(3'')-Ib	3180	6030	ISKpn19
	NODE_120_length_6157_cov_10.535489	2229	3065	APH(6)-Id	3180	6030	ISKpn19
	NODE_124_length_5099_cov_5.046862	4312	4971	catI	150	3678	Tn6196
	NODE_17_length_74357_cov_4.304553	2725	4473	msbA	910	1677	ISSen9
R94_S140_Citrobacter_werkmanii	NODE_105_length_6960_cov_6.541929	814	1998	tet(D)	2011	6833	Tn2
	NODE_105_length_6960_cov_6.541929	5953	6813	TEM-1	2011	6833	Tn2
R94_S141_Pseudomonas_aeruginosa	NODE_154_length_13192_cov_3.533639	10453	11256	APH(3'')-Ib	6729	10362	Tn6082
	NODE_154_length_13192_cov_3.533639	11256	12092	APH(6)-Id	6729	10362	Tn6082
	NODE_249_length_3069_cov_2.748810	114	647	ANT(2'')-Ia	656	2027	ISKpn4
	NODE_249_length_3069_cov_2.748810	2090	2917	OXA-2	656	2027	ISKpn4
R94_S142_Escherichia_coli	NODE_143_length_5099_cov_6.648029	129	788	catI	1422	4950	Tn6196
R94_S143_Escherichia_coli	NODE_129_length_6383_cov_7.617807	129	788	catI	1422	4950	Tn6196
	NODE_148_length_4100_cov_24.145482	49	951	mphA	3221	4100	IS6100
R94_S144_Klebsiella_pneumoniae	NODE_50_length_18992_cov_7.582083	7858	8514	QnrS1	9263 14257 13269 6315	12113 15409 14256 7082	ISKpn19 ISEc33 ISAba125 ISKpn14
	NODE_50_length_18992_cov_7.582083	12392	13171	APH(3')-VI	9263 14257 13269 6315	12113 15409 14256 7082	ISKpn19 ISEc33 ISAba125 ISKpn14
	NODE_50_length_18992_cov_7.582083	15604	16416	NDM-1	9263 14257 13269 6315	12113 15409 14256 7082	ISKpn19 ISEc33 ISAba125 ISKpn14
	NODE_50_length_18992_cov_7.582083	16420	16785	determinant_of_bleomycin_resistance	9263 14257 13269 6315	12113 15409 14256 7082	ISKpn19 ISEc33 ISAba125 ISKpn14
R94_S145_Escherichia_coli	NODE_102_length_6117_cov_7.090651	1280	2140	TEM-1	4697	5928	IS1133
	NODE_102_length_6117_cov_7.090651	2989	3825	APH(6)-Id	4697	5928	IS1133
	NODE_102_length_6117_cov_7.090651	3825	4628	APH(3'')-Ib	4697	5928	IS1133
	NODE_2_length_232469_cov_5.047550	230006	231211	tet(B)	227238	228005	ISSen9
R94_S146_Klebsiella_pneumoniae	NODE_117_length_7001_cov_13.588886	4938	5798	AAC(3)-IId	622	2238	ISCfr1
	NODE_117_length_7001_cov_13.588886	5980	6840	TEM-1	622	2238	ISCfr1
R94_S148_Escherichia_coli	NODE_107_length_5580_cov_7.000000	3934	4749	sul2	2406	3382	ISVsa3
	NODE_116_length_4387_cov_8.636385	196	1098	mphA	3368	4247	IS6100
	NODE_38_length_44180_cov_8.940957	39859	40658	ANT(3'')-IIa	29976	44042	Tn7
	NODE_38_length_44180_cov_8.940957	41324	41797	dfrA1	29976	44042	Tn7
	NODE_6_length_135001_cov_8.111526	1089	2335	tet(A)	4553 10343	8216 11767	Tn5403 IS4
R94_S149_Klebsiella_pneumoniae	NODE_44_length_37112_cov_7.465973	31306	31758	arr-2	3403 1887 27318 20705	5680 3358 28373 22424	ISKpn21 ISRor8 ISKpn74 ISEc38
	NODE_44_length_37112_cov_7.465973	32034	33260	EreA2	3403 1887 27318 20705	5680 3358 28373 22424	ISKpn21 ISRor8 ISKpn74 ISEc38
	NODE_44_length_37112_cov_7.465973	33336	34137	ANT(3'')-IIa	3403 1887 27318 20705	5680 3358 28373 22424	ISKpn21 ISRor8 ISKpn74 ISEc38
	NODE_44_length_37112_cov_7.465973	36151	36987	sul1	3403 1887 27318 20705	5680 3358 28373 22424	ISKpn21 ISRor8 ISKpn74 ISEc38
	NODE_87_length_7963_cov_7.365237	1174	2034	TEM-1	3403 1887 27318 20705	5680 3358 28373 22424	ISKpn21 ISRor8 ISKpn74 ISEc38
	NODE_87_length_7963_cov_7.365237	2216	3076	AAC(3)-IId	3403 1887 27318 20705	5680 3358 28373 22424	ISKpn21 ISRor8 ISKpn74 ISEc38
R94_S151_Escherichia_coli	NODE_70_length_8822_cov_9.586889	256	1053	OXA-181	2886	5736	ISKpn19
	NODE_70_length_8822_cov_9.586889	7012	7668	QnrS1	2886	5736	ISKpn19
	NODE_81_length_5210_cov_15.074169	4113	5015	mphA	964	1843	IS6100
R94_S153_Escherichia_coli	NODE_116_length_6251_cov_9.303070	954	1436	dfrA14	2005	2884	IS6100
	NODE_116_length_6251_cov_9.303070	5154	6056	mphA	2005	2884	IS6100
	NODE_60_length_26671_cov_4.770871	2765	3640	CTX-M-15	3689 8701 7673	5344 9896 8440	ISEc9 ISKpn26 ISSen9
R94_S156_Citrobacter_werkmanii	NODE_11_length_136748_cov_4.226627	39777	40893	CMY-98	34109	34224	MITEEc1
R94_S158_Aeromonas_caviae	NODE_8_length_92275_cov_5.355244	23887	24723	APH(6)-Id	14012 19622	15952 20598	ISAeme17 ISVsa3
	NODE_8_length_92275_cov_5.355244	24723	25526	APH(3'')-Ib	14012 19622	15952 20598	ISAeme17 ISVsa3
	NODE_8_length_92275_cov_5.355244	25587	26402	sul2	14012 19622	15952 20598	ISAeme17 ISVsa3
R94_S159_Escherichia_coli	NODE_138_length_6117_cov_4.602838	1280	2140	TEM-1	4697	5928	IS1133
	NODE_138_length_6117_cov_4.602838	2989	3825	APH(6)-Id	4697	5928	IS1133
	NODE_138_length_6117_cov_4.602838	3825	4628	APH(3'')-Ib	4697	5928	IS1133
R94_S161_Escherichia_coli	NODE_73_length_13344_cov_5.732920	3073	3888	sul2	122	2629	ISKox1
	NODE_73_length_13344_cov_5.732920	3949	4752	APH(3'')-Ib	122	2629	ISKox1
	NODE_73_length_13344_cov_5.732920	4752	5588	APH(6)-Id	122	2629	ISKox1
	NODE_73_length_13344_cov_5.732920	11310	12170	TEM-1	122	2629	ISKox1
R94_S162_Escherichia_coli	NODE_27_length_60447_cov_7.274702	59080	60354	tet(A)	55666	57199	ISKpn15
	NODE_53_length_31098_cov_8.323109	19386	20573	CMY-59	17455	18838	ISApu1
R94_S163_Escherichia_coli	NODE_73_length_8851_cov_5.712059	3498	4313	sul2	1739	3065	IS5075
	NODE_73_length_8851_cov_5.712059	4374	5177	APH(3'')-Ib	1739	3065	IS5075
	NODE_73_length_8851_cov_5.712059	5177	6013	APH(6)-Id	1739	3065	IS5075
	NODE_73_length_8851_cov_5.712059	6734	7594	TEM-1	1739	3065	IS5075
	NODE_85_length_4388_cov_5.461159	196	1098	mphA	3368	4247	IS6100
R94_S164_Citrobacter_freundii	NODE_2_length_268660_cov_6.157653	1299	2545	tet(A)	16885	17008	MITEEc1
R94_S166_Acinetobacter_baumannii	NODE_1_length_171583_cov_10.864268	343	1542	tet(B)	2854	3830	ISVsa3
	NODE_1_length_171583_cov_10.864268	4901	5737	APH(6)-Id	2854	3830	ISVsa3
	NODE_1_length_171583_cov_10.864268	5737	6540	APH(3'')-Ib	2854	3830	ISVsa3
	NODE_47_length_30003_cov_9.099244	23310	24785	msrE	26328 21621	28748 22945	ISAba24 ISEc29
	NODE_47_length_30003_cov_9.099244	24841	25725	mphE	26328 21621	28748 22945	ISAba24 ISEc29
R94_S167_Klebsiella_pneumoniae	NODE_79_length_16764_cov_6.192342	176	1051	CTX-M-15	7097 12091 11103	9947 13243 12090	ISKpn19 ISEc33 ISAba125
	NODE_79_length_16764_cov_6.192342	5692	6348	QnrS1	7097 12091 11103	9947 13243 12090	ISKpn19 ISEc33 ISAba125
	NODE_79_length_16764_cov_6.192342	10226	11005	APH(3')-VI	7097 12091 11103	9947 13243 12090	ISKpn19 ISEc33 ISAba125
	NODE_79_length_16764_cov_6.192342	13438	14250	NDM-1	7097 12091 11103	9947 13243 12090	ISKpn19 ISEc33 ISAba125
	NODE_79_length_16764_cov_6.192342	14254	14619	determinant_of_bleomycin_resistance	7097 12091 11103	9947 13243 12090	ISKpn19 ISEc33 ISAba125
R94_S168_Escherichia_coli	NODE_54_length_22166_cov_7.855756	19193	20008	sul2	16218	16980	ISEc30
	NODE_54_length_22166_cov_7.855756	20069	20872	APH(3'')-Ib	16218	16980	ISEc30
	NODE_54_length_22166_cov_7.855756	20872	21708	APH(6)-Id	16218	16980	ISEc30
	NODE_75_length_6604_cov_5.974680	196	1098	mphA	3368	4247	IS6100
	NODE_75_length_6604_cov_5.974680	5228	6088	TEM-1	3368	4247	IS6100
R94_S169_Pseudomonas_putida	NODE_126_length_4251_cov_5.507032	3586	4119	ANT(2'')-Ia	914	2290	ISKpn4
R94_S170_Escherichia_coli	NODE_33_length_45880_cov_5.364217	19461	21209	msbA	17646	18413	ISSen9
R94_S172_Proteus_mirabilis	NODE_117_length_2993_cov_23.072924	201	1040	sul1	2114	2993	IS6100
	NODE_7_length_104109_cov_12.487431	56673	57509	APH(6)-Id	48343 59495 52408	51554 60727 53384	ISShfr9 ISVch12 ISVsa3
	NODE_7_length_104109_cov_12.487431	57509	58312	APH(3'')-Ib	48343 59495 52408	51554 60727 53384	ISShfr9 ISVch12 ISVsa3
	NODE_7_length_104109_cov_12.487431	58373	59188	sul2	48343 59495 52408	51554 60727 53384	ISShfr9 ISVch12 ISVsa3
R94_S173_Escherichia_coli	NODE_1_length_352668_cov_5.227032	349912	350727	sul2	344624 348153 343616	348152 349479 344383	Tn6196 IS5075 ISSen9
	NODE_1_length_352668_cov_5.227032	350788	351591	APH(3'')-Ib	344624 348153 343616	348152 349479 344383	Tn6196 IS5075 ISSen9
	NODE_1_length_352668_cov_5.227032	351591	352427	APH(6)-Id	344624 348153 343616	348152 349479 344383	Tn6196 IS5075 ISSen9
	NODE_26_length_74581_cov_4.969605	69881	71629	msbA	72677	73444	ISSen9
R94_S175_Acinetobacter_baumannii	NODE_19_length_63737_cov_11.737305	59813	60616	APH(3'')-Ib	62537	63513	ISVsa3
	NODE_19_length_63737_cov_11.737305	60616	61452	APH(6)-Id	62537	63513	ISVsa3
	NODE_3_length_216610_cov_9.774283	208256	209080	OXA-66	215449	216487	ISAba13
	NODE_57_length_11554_cov_19.283014	1	746	AAC(6')-Ib7	9729 5843	11053 6739	ISEc29 ISEc28
	NODE_57_length_11554_cov_19.283014	839	1471	catB8	9729 5843	11053 6739	ISEc29 ISEc28
	NODE_57_length_11554_cov_19.283014	1519	2320	ANT(3'')-IIa	9729 5843	11053 6739	ISEc29 ISEc28
	NODE_57_length_11554_cov_19.283014	2825	3664	sul1	9729 5843	11053 6739	ISEc29 ISEc28
	NODE_70_length_6807_cov_16.048653	126	1591	msrE	3134	5554	ISAba24
	NODE_70_length_6807_cov_16.048653	1647	2531	mphE	3134	5554	ISAba24
R94_S176_Escherichia_coli	NODE_53_length_33138_cov_5.147920	11930	13678	msbA	14726	15493	ISSen9
R94_S178_Escherichia_coli	NODE_54_length_15462_cov_4.633257	316	1218	mphA	3488	4367	IS6100
	NODE_54_length_15462_cov_4.633257	6541	7380	sul1	3488	4367	IS6100
	NODE_54_length_15462_cov_4.633257	8957	10096	DHA-1	3488	4367	IS6100
	NODE_54_length_15462_cov_4.633257	14217	14864	QnrB4	3488	4367	IS6100
	NODE_67_length_6074_cov_4.548176	1447	2250	APH(3'')-Ib	147	1378	IS1133
	NODE_67_length_6074_cov_4.548176	2250	3086	APH(6)-Id	147	1378	IS1133
	NODE_67_length_6074_cov_4.548176	3935	4795	TEM-1	147	1378	IS1133
R94_S179_Escherichia_coli	NODE_62_length_15342_cov_4.017023	599	1246	QnrB4	11096	11975	IS6100
	NODE_62_length_15342_cov_4.017023	5367	6506	DHA-1	11096	11975	IS6100
	NODE_62_length_15342_cov_4.017023	8083	8922	sul1	11096	11975	IS6100
	NODE_62_length_15342_cov_4.017023	14245	15147	mphA	11096	11975	IS6100
	NODE_84_length_6046_cov_4.167258	1419	2222	APH(3'')-Ib	119	1350	IS1133
	NODE_84_length_6046_cov_4.167258	2222	3058	APH(6)-Id	119	1350	IS1133
	NODE_84_length_6046_cov_4.167258	3907	4767	TEM-1	119	1350	IS1133
R94_S180_Escherichia_coli	NODE_105_length_11066_cov_7.790840	7667	8506	sul1	5198	5981	ISEc30
	NODE_105_length_11066_cov_7.790840	9031	9504	dfrA5	5198	5981	ISEc30
	NODE_108_length_10269_cov_10.497239	3601	4167	QnrS1	2	2852	ISKpn19
	NODE_108_length_10269_cov_10.497239	9125	10000	CTX-M-15	2	2852	ISKpn19
R94_S181_Escherichia_coli	NODE_98_length_5364_cov_5.407294	197	1099	mphA	3369	4248	IS6100
R94_S183_Escherichia_coli	NODE_45_length_41202_cov_9.251126	10526	11713	CMY-59	12034	13417	ISApu1
R94_S185_Escherichia_coli	NODE_124_length_4387_cov_4.287324	3289	4191	mphA	140	1019	IS6100
R94_S186_Acinetobacter_baumannii	NODE_18_length_67900_cov_11.604061	2364	3563	tet(B)	4875	5851	ISVsa3
	NODE_18_length_67900_cov_11.604061	6936	7772	APH(6)-Id	4875	5851	ISVsa3
	NODE_18_length_67900_cov_11.604061	7772	8575	APH(3'')-Ib	4875	5851	ISVsa3
	NODE_6_length_172193_cov_10.622424	4091	4975	mphE	1068 6871	3488 8195	ISAba24 ISEc29
	NODE_6_length_172193_cov_10.622424	5031	6506	msrE	1068 6871	3488 8195	ISAba24 ISEc29
R94_S187_Escherichia_coli	NODE_113_length_6602_cov_5.321699	3877	4692	sul2	2118	3444	IS5075
	NODE_113_length_6602_cov_5.321699	4753	5556	APH(3'')-Ib	2118	3444	IS5075
	NODE_113_length_6602_cov_5.321699	5556	6392	APH(6)-Id	2118	3444	IS5075
	NODE_128_length_4388_cov_6.473832	3291	4193	mphA	142	1021	IS6100
	NODE_99_length_9681_cov_5.968809	1142	1798	QnrS1	2547	5397	ISKpn19
	NODE_99_length_9681_cov_5.968809	6378	7652	tet(A)	2547	5397	ISKpn19
R94_S190_Pseudomonas_spp	NODE_215_length_7255_cov_4.471521	3143	4318	tet(G)	1	3689	Tn6061
	NODE_2_length_100614_cov_5.529616	78342	79145	APH(3'')-Ib	74618 90233 84434 80781	78251 91112 85253 81600	Tn6082 IS6100 IS26 IS26
	NODE_2_length_100614_cov_5.529616	79145	79981	APH(6)-Id	74618 90233 84434 80781	78251 91112 85253 81600	Tn6082 IS6100 IS26 IS26
	NODE_2_length_100614_cov_5.529616	81998	83473	msrE	74618 90233 84434 80781	78251 91112 85253 81600	Tn6082 IS6100 IS26 IS26
	NODE_2_length_100614_cov_5.529616	83529	84413	mphE	74618 90233 84434 80781	78251 91112 85253 81600	Tn6082 IS6100 IS26 IS26
	NODE_2_length_100614_cov_5.529616	85981	86766	AAC(6')-Ib7	74618 90233 84434 80781	78251 91112 85253 81600	Tn6082 IS6100 IS26 IS26
	NODE_2_length_100614_cov_5.529616	88320	89159	sul1	74618 90233 84434 80781	78251 91112 85253 81600	Tn6082 IS6100 IS26 IS26
R94_S191_Escherichia_coli	NODE_114_length_5435_cov_4.451959	2764	3639	CTX-M-15	3688	5343	ISEc9
R94_S194_Klebsiella_pneumoniae	NODE_48_length_41615_cov_4.294977	39992	40474	dfrA14	38544	39423	IS6100
R94_S196_Klebsiella_pneumoniae	NODE_187_length_9755_cov_6.394786	743	1603	TEM-1	5271	6597	IS5075
	NODE_187_length_9755_cov_6.394786	2324	3160	APH(6)-Id	5271	6597	IS5075
	NODE_187_length_9755_cov_6.394786	3160	3963	APH(3'')-Ib	5271	6597	IS5075
	NODE_187_length_9755_cov_6.394786	4024	4839	sul2	5271	6597	IS5075
R94_S198_Escherichia_coli	NODE_23_length_57016_cov_3.951625	2134	3380	tet(A)	5598 16190	9261 18770	Tn5403 ISEc12
	NODE_52_length_4367_cov_3.082547	196	1098	mphA	3368	4240	IS6100
R94_S199_Escherichia_coli	NODE_107_length_6602_cov_4.994131	3877	4692	sul2	2118	3444	IS5075
	NODE_107_length_6602_cov_4.994131	4753	5556	APH(3'')-Ib	2118	3444	IS5075
	NODE_107_length_6602_cov_4.994131	5556	6392	APH(6)-Id	2118	3444	IS5075
	NODE_117_length_4388_cov_15.559962	3291	4193	mphA	142	1021	IS6100
	NODE_92_length_9227_cov_4.744835	1604	2850	tet(A)	3831	6681	ISKpn19
	NODE_92_length_9227_cov_4.744835	7430	8086	QnrS1	3831	6681	ISKpn19
R94_S200_Klebsiella_pneumoniae	NODE_111_length_16332_cov_5.116631	13376	14236	TEM-1	11516	12395	IS6100
	NODE_111_length_16332_cov_5.116631	14406	15161	rmtB	11516	12395	IS6100
R94_S202_Enterobacter_cloacae	NODE_128_length_13461_cov_2.479601	4696	5061	determinant_of_bleomycin_resistance	6072	6327	MITESen1
	NODE_128_length_13461_cov_2.479601	5065	5877	NDM-1	6072	6327	MITESen1
	NODE_128_length_13461_cov_2.479601	6435	7280	rmtC	6072	6327	MITESen1
R94_S203_Escherichia_coli	NODE_18_length_105411_cov_4.608820	63984	64457	dfrA1	8017 61270	9763 62467	IS609 ISIba1
	NODE_41_length_41575_cov_22.224474	5140	5955	APH(3')-Ia	27465	28521	IS102
	NODE_41_length_41575_cov_22.224474	33954	35200	tet(A)	36181 27465	39031 28521	ISKpn19 IS102
	NODE_41_length_41575_cov_22.224474	39780	40436	QnrS1	36181 27465	39031 28521	ISKpn19 IS102
	NODE_90_length_4380_cov_6.456619	197	1102	mphA	3360	4239	IS6100
R94_S205_Escherichia_coli	NODE_4_length_259111_cov_3.868401	81025	82773	msbA	100529	101859	IS2
	NODE_66_length_8822_cov_4.304773	1155	1811	QnrS1	3087	5937	ISKpn19
	NODE_66_length_8822_cov_4.304773	7770	8567	OXA-484	3087	5937	ISKpn19
	NODE_73_length_6759_cov_23.148673	196	1101	mphA	3359	4238	IS6100
R94_S206_Escherichia_coli	NODE_55_length_11256_cov_3.992272	2765	3640	CTX-M-15	3689 9879	5344 11110	ISEc9 IS1133
	NODE_55_length_11256_cov_3.992272	6462	7322	TEM-1	3689 9879	5344 11110	ISEc9 IS1133
	NODE_55_length_11256_cov_3.992272	8171	9007	APH(6)-Id	3689 9879	5344 11110	ISEc9 IS1133
	NODE_55_length_11256_cov_3.992272	9007	9810	APH(3'')-Ib	3689 9879	5344 11110	ISEc9 IS1133
R94_S82_Pseudomonas_spp	NODE_1_length_214615_cov_4.645216	65391	66228	sul1	73547	77180	Tn6082
	NODE_1_length_214615_cov_4.645216	71817	72653	APH(6)-Id	73547	77180	Tn6082
	NODE_1_length_214615_cov_4.645216	72653	73456	APH(3'')-Ib	73547	77180	Tn6082
R94_S83_Pseudomonas_putida	NODE_22_length_88344_cov_3.739030	42	1517	msrE	5492 1915	6468 2734	ISVsa3 IS26
	NODE_22_length_88344_cov_3.739030	7020	7835	sul2	5492 1915	6468 2734	ISVsa3 IS26
R94_S84_Escherichia_coli	NODE_45_length_41207_cov_5.484129	29498	30685	CMY-59	27794	29177	ISApu1
	NODE_81_length_12060_cov_7.369480	3097	3912	sul2	128	2653	ISKox1
	NODE_81_length_12060_cov_7.369480	3973	4776	APH(3'')-Ib	128	2653	ISKox1
	NODE_81_length_12060_cov_7.369480	4776	5612	APH(6)-Id	128	2653	ISKox1
	NODE_81_length_12060_cov_7.369480	6873	8147	tet(A)	128	2653	ISKox1
R94_S86_Aeromonas_veronii_2	NODE_51_length_24979_cov_17.629969	2934	3416	dfrA14	1486	2365	IS6100
	NODE_51_length_24979_cov_17.629969	3442	4253	ANT(3'')-IIa	1486	2365	IS6100
	NODE_51_length_24979_cov_17.629969	4250	5050	OXA-10	1486	2365	IS6100
	NODE_51_length_24979_cov_17.629969	6789	7368	AAC(6')-Ib9	1486	2365	IS6100
	NODE_51_length_24979_cov_17.629969	7510	8166	QnrVC4	1486	2365	IS6100
	NODE_51_length_24979_cov_17.629969	20830	22076	tet(A)	1486	2365	IS6100
R94_S88_Klebsiella_pneumoniae	NODE_51_length_13738_cov_4.031078	3091	3906	sul2	8305 1332	9960 2658	ISEc9 IS5075
	NODE_51_length_13738_cov_4.031078	3967	4770	APH(3'')-Ib	8305 1332	9960 2658	ISEc9 IS5075
	NODE_51_length_13738_cov_4.031078	4770	5606	APH(6)-Id	8305 1332	9960 2658	ISEc9 IS5075
	NODE_51_length_13738_cov_4.031078	6327	7187	TEM-1	8305 1332	9960 2658	ISEc9 IS5075
	NODE_51_length_13738_cov_4.031078	10009	10884	CTX-M-15	8305 1332	9960 2658	ISEc9 IS5075
	NODE_54_length_12991_cov_5.708256	7643	8482	sul1	4590	5469	IS6100
	NODE_54_length_12991_cov_5.708256	8987	9766	aadA2	4590	5469	IS6100
	NODE_54_length_12991_cov_5.708256	10186	10683	dfrA12	4590	5469	IS6100
R94_S91_Pseudomonas_aeruginosa	NODE_299_length_7958_cov_1.553441	3708	4511	APH(3'')-Ib	1	3617	Tn6082
	NODE_299_length_7958_cov_1.553441	4511	5347	APH(6)-Id	1	3617	Tn6082
	NODE_299_length_7958_cov_1.553441	5968	6624	QnrVC1	1	3617	Tn6082
R94_S92_Klebsiella_pneumoniae	NODE_164_length_11200_cov_4.378127	5828	6643	sul2	1472	2291	IS26
	NODE_164_length_11200_cov_4.378127	6704	7507	APH(3'')-Ib	1472	2291	IS26
	NODE_164_length_11200_cov_4.378127	7507	8343	APH(6)-Id	1472	2291	IS26
	NODE_164_length_11200_cov_4.378127	9064	9924	TEM-1	1472	2291	IS26
	NODE_253_length_7657_cov_4.597344	6129	6808	QnrB17	126	3789	Tn5403
	NODE_429_length_3858_cov_3.490485	1769	2251	dfrA14	2820	3699	IS6100
R94_S93_Proteus_mirabilis	NODE_2_length_106235_cov_10.733686	46865	47572	sul2	54391 45632 52561	57602 46864 53537	ISShfr9 ISVch12 ISVsa3
	NODE_2_length_106235_cov_10.733686	47633	48436	APH(3'')-Ib	54391 45632 52561	57602 46864 53537	ISShfr9 ISVch12 ISVsa3
	NODE_2_length_106235_cov_10.733686	48436	49272	APH(6)-Id	54391 45632 52561	57602 46864 53537	ISShfr9 ISVch12 ISVsa3
R94_S94_Klebsiella_pneumoniae	NODE_37_length_32856_cov_6.494913	30029	31275	tet(A)	25310 3020 17939	29049 3787 18706	Tn4656 ISKpn14 ISKpn14
	NODE_55_length_11485_cov_5.789664	872	1687	sul2	6086	7741	ISEc9
	NODE_55_length_11485_cov_5.789664	1748	2551	APH(3'')-Ib	6086	7741	ISEc9
	NODE_55_length_11485_cov_5.789664	2551	3387	APH(6)-Id	6086	7741	ISEc9
	NODE_55_length_11485_cov_5.789664	4108	4968	TEM-1	6086	7741	ISEc9
	NODE_55_length_11485_cov_5.789664	7790	8665	CTX-M-15	6086	7741	ISEc9
R94_S95_Escherichia_coli	NODE_101_length_13332_cov_5.657100	11117	11977	TEM-1	12512 9776	13331 10595	IS26 IS26
	NODE_109_length_11946_cov_3.372790	2301	2774	dfrA1	9038	10991	ISSen8
	NODE_109_length_11946_cov_3.372790	3440	4239	ANT(3'')-IIa	9038	10991	ISSen8
R94_S96_Klebsiella_pneumoniae	NODE_70_length_12146_cov_4.737749	9297	10543	tet(A)	4594	8333	Tn4656
	NODE_85_length_8262_cov_3.650154	6011	6493	dfrA14	4563	5442	IS6100
	NODE_91_length_7755_cov_4.411117	6129	6808	QnrB17	126	3789	Tn5403
R94_S97_Proteus_mirabilis	NODE_26_length_59983_cov_13.187450	1	797	sul1	5050 1349	13488 5049	Tn512 Tn4656
R94_S98_Escherichia_coli	NODE_38_length_23117_cov_7.372423	350	1009	catI	1643	5171	Tn6196
	NODE_38_length_23117_cov_7.372423	6805	7590	AAC(6')-Ib7	1643	5171	Tn6196
	NODE_38_length_23117_cov_7.372423	7685	8317	catB3	1643	5171	Tn6196
	NODE_38_length_23117_cov_7.372423	8386	8859	dfrA1	1643	5171	Tn6196
	NODE_38_length_23117_cov_7.372423	9963	10802	sul1	1643	5171	Tn6196
	NODE_53_length_5203_cov_8.176714	4069	4929	TEM-1	127	5076	Tn2
FGL20240223NXQR100WGS1472_S258_Klebsiella_pneumoniae	NODE_276_length_4835_cov_7.516992	3734	4639	mphA	597	1476	IS6100
	NODE_334_length_2623_cov_2.806090	809	1489	QnrB17	515	771	MITESen1
FGL20240223NXQR100WGS1475_S261_Pseudomonas_aeruginosa	NODE_28_length_84790_cov_4.181035	1940	2753	aadA11	559	1940	ISUnCu1
	NODE_28_length_84790_cov_4.181035	3432	4088	QnrVC1	559	1940	ISUnCu1
FGL20240223NXQR100WGS1476_S262_Klebsiella_pneumoniae	NODE_86_length_11233_cov_3.370430	6943	7416	dfrA7	1480	5232	Tn4656
	NODE_86_length_11233_cov_3.370430	7987	8826	sul1	1480	5232	Tn4656
FGL20240223NXQR100WGS1477_S263_Enterobacter_hormaechei	NODE_34_length_24382_cov_3.251082	22805	23665	TEM-1	18863	23812	Tn2
FGL20240223NXQR100WGS1479_S265_Klebsiella_pneumoniae	NODE_63_length_19884_cov_16.886774	1208	1787	AAC(6')-Ib9	6987	7866	IS6100
	NODE_63_length_19884_cov_16.886774	2198	2977	rmtF	6987	7866	IS6100
FGL20240223NXQR100WGS1482_S268_Klebsiella_quasipneumoniae	NODE_4_length_75444_cov_2.007834	70543	71358	sul2	68784 45378	70110 45494	IS5075 MITEYpe1
	NODE_4_length_75444_cov_2.007834	71419	72222	APH(3'')-Ib	68784 45378	70110 45494	IS5075 MITEYpe1
	NODE_4_length_75444_cov_2.007834	72222	73058	APH(6)-Id	68784 45378	70110 45494	IS5075 MITEYpe1
FGL20240223NXQR100WGS1486_S272_Klebsiella_pneumoniae	NODE_66_length_10135_cov_4.462730	1570	2385	sul2	4200	7050	ISKpn19
	NODE_66_length_10135_cov_4.462730	2446	3249	APH(3'')-Ib	4200	7050	ISKpn19
	NODE_66_length_10135_cov_4.462730	3249	4085	APH(6)-Id	4200	7050	ISKpn19
	NODE_66_length_10135_cov_4.462730	8326	8982	QnrS1	4200	7050	ISKpn19
FGL20240223NXQR100WGS1488_S274_Morganella_morganii	NODE_39_length_29083_cov_3.093349	2354	2827	dfrA1	109	14175	Tn7
	NODE_39_length_29083_cov_3.093349	3493	4292	ANT(3'')-IIa	109	14175	Tn7
FGL20240223NXQR100WGS1489_S275_Escherichia_coli	NODE_111_length_11109_cov_9.943453	264	1139	CTX-M-15	7185	10035	ISKpn19
	NODE_111_length_11109_cov_9.943453	5780	6436	QnrS1	7185	10035	ISKpn19
FGL20240223NXQR100WGS1490_S276_Klebsiella_pneumoniae	NODE_118_length_3828_cov_3.135099	1579	2061	dfrA14	131	1010	IS6100
	NODE_93_length_11145_cov_2.444091	948	1627	QnrB17	3967	7630	Tn5403
FGL20240223NXQR100WGS1492_S278_Morganella_morganii	NODE_3_length_315960_cov_7.703147	5737	6597	AAC(3)-IId	1420 312477 6867	3037 313812 7634	ISCfr1 ISEcl1 ISKpn14
FGL20240223NXQR100WGS1493_S279_Enterobacter_hormaechei	NODE_48_length_30564_cov_5.078917	3663	4478	sul2	6752 1905	6752 1905	Tn2 IS5075
	NODE_48_length_30564_cov_5.078917	4539	5342	APH(3'')-Ib	6752 1905	6752 1905	Tn2 IS5075
	NODE_48_length_30564_cov_5.078917	5342	6178	APH(6)-Id	6752 1905	6752 1905	Tn2 IS5075
	NODE_48_length_30564_cov_5.078917	6899	7759	TEM-1	6752 1905	6752 1905	Tn2 IS5075
	NODE_80_length_7455_cov_5.379094	5680	6162	dfrA14	4232	5111	IS6100
FGL20240223NXQR100WGS1494_S280_Klebsiella_pneumoniae	NODE_64_length_11233_cov_8.732397	2408	3247	sul1	6002	9754	Tn4656
	NODE_64_length_11233_cov_8.732397	3818	4291	dfrA7	6002	9754	Tn4656
FGL20240223NXQR100WGS1496_S282_Klebsiella_pneumoniae	NODE_12_length_29591_cov_3.012422	8022	8897	CTX-M-15	6318 12186	7973 13628	ISEc9 ISKpn8
FGL20240223NXQR100WGS1499_S285_Morganella_morganii	NODE_17_length_30423_cov_1.518847	2111	3357	tet(A)	5575	9238	Tn5403
FGL20240223NXQR100WGS1506_S292_Escherichia_coli	NODE_34_length_43432_cov_7.277127	10523	11710	CMY-59	12031	13414	ISApu1
	NODE_34_length_43432_cov_7.277127	41403	42218	sul2	12031	13414	ISApu1
	NODE_34_length_43432_cov_7.277127	42279	43082	APH(3'')-Ib	12031	13414	ISApu1
FGL20240223NXQR100WGS1508_S294_Escherichia_coli	NODE_82_length_11388_cov_6.535299	3396	4256	TEM-1	7435	8761	IS5075
	NODE_82_length_11388_cov_6.535299	4487	5323	APH(6)-Id	7435	8761	IS5075
	NODE_82_length_11388_cov_6.535299	5323	6126	APH(3'')-Ib	7435	8761	IS5075
	NODE_82_length_11388_cov_6.535299	6187	7002	sul2	7435	8761	IS5075
	NODE_89_length_6103_cov_6.253681	133	792	catI	1426	4954	Tn6196
FGL20240223NXQR100WGS1509_S295_Morganella_morganii	NODE_27_length_49322_cov_3.630694	966	1439	dfrA17	1796	2563	ISSen9
	NODE_51_length_27864_cov_3.901143	5299	5772	dfrA1	3054	17120	Tn7
	NODE_51_length_27864_cov_3.901143	6438	7237	ANT(3'')-IIa	3054	17120	Tn7
FGL20240223NXQR100WGS1510_S296_Escherichia_coli	NODE_62_length_11373_cov_5.925129	5182	5997	sul2	3423	4749	IS5075
	NODE_62_length_11373_cov_5.925129	6058	6861	APH(3'')-Ib	3423	4749	IS5075
	NODE_62_length_11373_cov_5.925129	6861	7697	APH(6)-Id	3423	4749	IS5075
	NODE_62_length_11373_cov_5.925129	7928	8788	TEM-1	3423	4749	IS5075
	NODE_74_length_6103_cov_7.510710	5312	5971	catI	1150	4678	Tn6196
FGL20240223NXQR100WGS1511_S297_Acinetobacter_baumannii	NODE_65_length_5882_cov_6.611816	2216	3052	APH(6)-Id	155	1131	ISVsa3
	NODE_65_length_5882_cov_6.611816	3052	3855	APH(3'')-Ib	155	1131	ISVsa3
FGL20240223NXQR100WGS1513_S299_Escherichia_coli	NODE_114_length_11109_cov_4.054362	264	1139	CTX-M-15	7185	10035	ISKpn19
	NODE_114_length_11109_cov_4.054362	5780	6436	QnrS1	7185	10035	ISKpn19
FGL20240223NXQR100WGS1517_S303_Klebsiella_pneumoniae	NODE_34_length_61474_cov_7.932841	1172	2032	AAC(3)-IId	4663 22545 7626	5482 23312 8393	IS26 ISKpn14 ISKpn14
	NODE_59_length_12126_cov_6.439370	2764	3639	CTX-M-15	3688	5343	ISEc9
	NODE_59_length_12126_cov_6.439370	6461	7321	TEM-1	3688	5343	ISEc9
	NODE_59_length_12126_cov_6.439370	8042	8878	APH(6)-Id	3688	5343	ISEc9
	NODE_59_length_12126_cov_6.439370	8878	9681	APH(3'')-Ib	3688	5343	ISEc9
	NODE_59_length_12126_cov_6.439370	9742	10557	sul2	3688	5343	ISEc9
FGL20240223NXQR100WGS1518_S304_Citrobacter_portucalensis	NODE_34_length_51060_cov_3.792551	18143	19330	CMY-59	12500	12613	MITEYpe1
FGL20240223NXQR100WGS1519_S305_Klebsiella_pneumoniae	NODE_3_length_321122_cov_3.856599	2765	3640	CTX-M-15	3689 6092	5344 7287	ISEc9 ISKpn26
FGL20240223NXQR100WGS1520_S306_Escherichia_coli	NODE_113_length_11109_cov_7.349299	264	1139	CTX-M-15	7185	10035	ISKpn19
	NODE_113_length_11109_cov_7.349299	5780	6436	QnrS1	7185	10035	ISKpn19
FGL20240223NXQR100WGS1521_S307_Morganella_morganii	NODE_11_length_117799_cov_5.359227	116361	116834	dfrA7	115237	116004	ISSen9
	NODE_13_length_113048_cov_5.442026	24791	25590	ANT(3'')-IIa	14908	28974	Tn7
	NODE_13_length_113048_cov_5.442026	26256	26729	dfrA1	14908	28974	Tn7
FGL20240223NXQR100WGS1522_S308_Proteus_penneri	NODE_14_length_72582_cov_7.699372	35851	36324	dfrA1	39850	42529	Tn4352
	NODE_14_length_72582_cov_7.699372	36322	37132	ANT(3'')-IIa	39850	42529	Tn4352
	NODE_14_length_72582_cov_7.699372	37637	38476	sul1	39850	42529	Tn4352
	NODE_14_length_72582_cov_7.699372	40757	41570	APH(3')-Ia	39850	42529	Tn4352
FGL20240223NXQR100WGS1523_S309_Klebsiella_pneumoniae	NODE_50_length_13435_cov_17.969492	2872	3747	CTX-M-15	3796	5451	ISEc9
	NODE_50_length_13435_cov_17.969492	7769	8629	TEM-1	3796	5451	ISEc9
	NODE_50_length_13435_cov_17.969492	9350	10186	APH(6)-Id	3796	5451	ISEc9
	NODE_50_length_13435_cov_17.969492	10186	10989	APH(3'')-Ib	3796	5451	ISEc9
	NODE_50_length_13435_cov_17.969492	11050	11865	sul2	3796	5451	ISEc9
FGL20240223NXQR100WGS1524_S310_Escherichia_coli	NODE_130_length_13705_cov_1.936589	7161	7634	dfrA1	12456	13705	ISEc52
	NODE_130_length_13705_cov_1.936589	8300	9099	ANT(3'')-IIa	12456	13705	ISEc52
FGL20240223NXQR100WGS1527_S313_Escherichia_coli	NODE_65_length_11373_cov_9.812022	2586	3446	TEM-1	6625	7951	IS5075
	NODE_65_length_11373_cov_9.812022	3677	4513	APH(6)-Id	6625	7951	IS5075
	NODE_65_length_11373_cov_9.812022	4513	5316	APH(3'')-Ib	6625	7951	IS5075
	NODE_65_length_11373_cov_9.812022	5377	6192	sul2	6625	7951	IS5075
FGL20240223NXQR100WGS1539_S324_Escherichia_coli	NODE_354_length_5174_cov_1.125421	380	1240	TEM-1	3797	5028	IS1133
	NODE_354_length_5174_cov_1.125421	2089	2925	APH(6)-Id	3797	5028	IS1133
	NODE_354_length_5174_cov_1.125421	2925	3728	APH(3'')-Ib	3797	5028	IS1133
FGL20240223NXQR100WGS1541_S326_Comamonas_aquatica	NODE_109_length_8786_cov_6.673288	1282	2166	mphE	4095	4914	IS26
	NODE_109_length_8786_cov_6.673288	2222	3697	msrE	4095	4914	IS26
	NODE_109_length_8786_cov_6.673288	6436	7626	tet(C)	4095	4914	IS26
	NODE_111_length_8442_cov_5.526518	994	1467	dfrA16	6414	7293	IS6100
	NODE_111_length_8442_cov_5.526518	2628	3407	aadA2	6414	7293	IS6100
	NODE_111_length_8442_cov_5.526518	5461	6300	sul1	6414	7293	IS6100
FGL20240223NXQR100WGS1544_S329_Klebsiella_michiganensis	NODE_16_length_121143_cov_3.735019	109923	110736	APH(3')-Ia	112780	115057	ISKpn21
FGL20240223NXQR100WGS1545_S330_Acinetobacter_baumannii	NODE_13_length_65664_cov_9.596884	59326	60129	APH(3'')-Ib	62050	63026	ISVsa3
	NODE_13_length_65664_cov_9.596884	60129	60965	APH(6)-Id	62050	63026	ISVsa3
	NODE_13_length_65664_cov_9.596884	64338	65537	tet(B)	62050	63026	ISVsa3
	NODE_81_length_15140_cov_8.528076	4279	5163	mphE	1256 7059	3676 8383	ISAba24 ISEc29
	NODE_81_length_15140_cov_8.528076	5219	6694	msrE	1256 7059	3676 8383	ISAba24 ISEc29
FGL20240223NXQR100WGS1546_S331_Acinetobacter_baumannii	NODE_40_length_37579_cov_5.667174	4091	4975	mphE	1068 6871	3488 8195	ISAba24 ISEc29
	NODE_40_length_37579_cov_5.667174	5031	6506	msrE	1068 6871	3488 8195	ISAba24 ISEc29
	NODE_82_length_8602_cov_5.639410	2056	2859	APH(3'')-Ib	4780	5756	ISVsa3
	NODE_82_length_8602_cov_5.639410	2859	3695	APH(6)-Id	4780	5756	ISVsa3
	NODE_82_length_8602_cov_5.639410	7068	8267	tet(B)	4780	5756	ISVsa3
FGL20240223NXQR100WGS1547_S332_Citrobacter_werkmanii	NODE_31_length_56617_cov_4.224854	40965	41825	TEM-1	37023 31725	41972 31847	Tn2 MITEEc1
FGL20240223NXQR100WGS1551_S336_Escherichia_coli	NODE_64_length_8822_cov_31.030822	256	1053	OXA-484	2886	5736	ISKpn19
	NODE_64_length_8822_cov_31.030822	7012	7668	QnrS1	2886	5736	ISKpn19
FGL20240223NXQR100WGS1552_S337_Morganella_morganii	NODE_10_length_130249_cov_9.489149	966	1439	dfrA7	1796	2563	ISSen9
	NODE_5_length_267850_cov_9.280387	38336	39135	ANT(3'')-IIa	28453	42519	Tn7
	NODE_5_length_267850_cov_9.280387	39801	40274	dfrA1	28453	42519	Tn7
FGL20240223NXQR100WGS1553_S338_Klebsiella_pneumoniae	NODE_31_length_64968_cov_10.420027	63235	64065	OXA-1	61836 38010 52929	62655 38777 53696	IS26 ISKpn14 ISKpn14
	NODE_31_length_64968_cov_10.420027	64196	64795	AAC(6')-Ib-cr	61836 38010 52929	62655 38777 53696	IS26 ISKpn14 ISKpn14
	NODE_54_length_12127_cov_8.224917	2764	3639	CTX-M-15	3688	5343	ISEc9
	NODE_54_length_12127_cov_8.224917	6461	7321	TEM-1	3688	5343	ISEc9
	NODE_54_length_12127_cov_8.224917	8042	8878	APH(6)-Id	3688	5343	ISEc9
	NODE_54_length_12127_cov_8.224917	8878	9681	APH(3'')-Ib	3688	5343	ISEc9
	NODE_54_length_12127_cov_8.224917	9742	10557	sul2	3688	5343	ISEc9
FGL20240223NXQR100WGS1554_S339_Morganella_morganii	NODE_16_length_82233_cov_9.732115	78594	79469	CTX-M-15	76890	78545	ISEc9
	NODE_34_length_40585_cov_9.215161	36699	37945	tet(A)	30818	34481	Tn5403
	NODE_49_length_27976_cov_11.258465	20604	21403	ANT(3'')-IIa	10721	24787	Tn7
	NODE_49_length_27976_cov_11.258465	22069	22542	dfrA1	10721	24787	Tn7
FGL20240223NXQR100WGS1555_S340_Providencia_rettgeri	NODE_7_length_73747_cov_12.340546	49085	49864	APH(3')-VI	67793 59314 49962	71439 60585 51016	Tn6196 ISVsa5 ISAba125
	NODE_7_length_73747_cov_12.340546	62137	62976	sul1	67793 59314 49962	71439 60585 51016	Tn6196 ISVsa5 ISAba125
	NODE_7_length_73747_cov_12.340546	63481	64292	ANT(3'')-IIa	67793 59314 49962	71439 60585 51016	Tn6196 ISVsa5 ISAba125
	NODE_7_length_73747_cov_12.340546	64289	65089	OXA-10	67793 59314 49962	71439 60585 51016	Tn6196 ISVsa5 ISAba125
	NODE_7_length_73747_cov_12.340546	65385	65837	arr-2	67793 59314 49962	71439 60585 51016	Tn6196 ISVsa5 ISAba125
	NODE_7_length_73747_cov_12.340546	65948	66430	dfrA14	67793 59314 49962	71439 60585 51016	Tn6196 ISVsa5 ISAba125
FGL20240223NXQR100WGS1556_S341_Klebsiella_quasipneumoniae	NODE_206_length_9894_cov_4.479472	203	1108	mphA	3366 7671	4245 8550	IS6100 IS6100
FGL20240223NXQR100WGS1560_S345_Citrobacter_werkmanii	NODE_20_length_118243_cov_3.620280	100565	101681	CMY-98	107233	107348	MITEEc1
FGL20240223NXQR100WGS1562_S347_Proteus_mirabilis	NODE_27_length_54293_cov_10.740095	45346	46161	sul2	43807	45039	ISVch12
	NODE_27_length_54293_cov_10.740095	46222	47025	APH(3'')-Ib	43807	45039	ISVch12
	NODE_27_length_54293_cov_10.740095	47025	47861	APH(6)-Id	43807	45039	ISVch12
	NODE_27_length_54293_cov_10.740095	51546	52361	sul2	43807	45039	ISVch12
	NODE_27_length_54293_cov_10.740095	52422	53225	APH(3'')-Ib	43807	45039	ISVch12
	NODE_27_length_54293_cov_10.740095	53225	54061	APH(6)-Id	43807	45039	ISVch12
FGL20240223NXQR100WGS1564_S349_Proteus_mirabilis	NODE_1_length_104261_cov_9.170694	56825	57661	APH(6)-Id	48495 59647	51706 60879	ISShfr9 ISVch12
	NODE_1_length_104261_cov_9.170694	57661	58464	APH(3'')-Ib	48495 59647	51706 60879	ISShfr9 ISVch12
	NODE_1_length_104261_cov_9.170694	58525	59340	sul2	48495 59647	51706 60879	ISShfr9 ISVch12
FGL20240223NXQR100WGS1565_S350_Proteus_mirabilis	NODE_40_length_37107_cov_9.298675	32791	33590	ANT(3'')-IIa	22908	36974	Tn7
	NODE_40_length_37107_cov_9.298675	34256	34729	dfrA1	22908	36974	Tn7
	NODE_67_length_12201_cov_6.334603	2352	3167	sul2	9705	11322	ISCfr1
	NODE_67_length_12201_cov_6.334603	3228	4031	APH(3'')-Ib	9705	11322	ISCfr1
	NODE_67_length_12201_cov_6.334603	4031	4867	APH(6)-Id	9705	11322	ISCfr1
	NODE_67_length_12201_cov_6.334603	6145	7005	AAC(3)-IId	9705	11322	ISCfr1
FGL20240223NXQR100WGS1566_S351_Citrobacter_werkmanii	NODE_1_length_494560_cov_4.390904	430711	431550	sul1	428758	429637	IS6100
	NODE_1_length_494560_cov_4.390904	432057	433019	ANT(3'')-IIa	428758	429637	IS6100
	NODE_44_length_32875_cov_2.369122	31906	32550	QnrB37	7823	7940	MITEYpe1
FGL20240223NXQR100WGS1567_S352_Morganella_morganii	NODE_11_length_126770_cov_3.549537	197	1102	mphA	3360	4239	IS6100
	NODE_11_length_126770_cov_3.549537	6413	7252	sul1	3360	4239	IS6100
	NODE_11_length_126770_cov_3.549537	8829	9968	DHA-1	3360	4239	IS6100
	NODE_15_length_107465_cov_3.053569	4263	5468	tet(B)	6675	8003	ISVsa5
	NODE_27_length_45649_cov_4.665744	5376	5849	dfrA1	3131	17197	Tn7
	NODE_27_length_45649_cov_4.665744	6515	7314	ANT(3'')-IIa	3131	17197	Tn7
	NODE_9_length_130199_cov_4.211321	128761	129234	dfrA7	127637	128404	ISSen9
FGL20240223NXQR100WGS1569_S354_Escherichia_coli	NODE_46_length_10582_cov_318.535342	559	1464	mphA	3722	4601	IS6100
	NODE_46_length_10582_cov_318.535342	6775	7614	sul1	3722	4601	IS6100
	NODE_46_length_10582_cov_318.535342	8161	8949	aadA5	3722	4601	IS6100
	NODE_46_length_10582_cov_318.535342	9080	9553	dfrA17	3722	4601	IS6100
FGL20240223NXQR100WGS1570_S355_Citrobacter_werkmanii	NODE_89_length_12628_cov_2.633709	564	1448	mphE	4467	5286	IS26
	NODE_89_length_12628_cov_2.633709	1504	2979	msrE	4467	5286	IS26
FGL20240223NXQR100WGS1571_S356_Proteus_mirabilis	NODE_51_length_25000_cov_3.879508	20676	21475	ANT(3'')-IIa	10794	24859	Tn7
	NODE_51_length_25000_cov_3.879508	22141	22614	dfrA1	10794	24859	Tn7
	NODE_97_length_14574_cov_3.281650	225	1085	AAC(3)-IId	3785	5402	ISCfr1
	NODE_97_length_14574_cov_3.281650	9567	10406	sul1	3785	5402	ISCfr1
	NODE_97_length_14574_cov_3.281650	10953	11741	aadA5	3785	5402	ISCfr1
	NODE_97_length_14574_cov_3.281650	11872	12345	dfrA17	3785	5402	ISCfr1
FGL20240223NXQR100WGS1572_S357_Escherichia_coli	NODE_194_length_9305_cov_2.225430	2053	2868	sul2	294 6224	1620 7043	IS5075 IS26
	NODE_194_length_9305_cov_2.225430	2929	3732	APH(3'')-Ib	294 6224	1620 7043	IS5075 IS26
	NODE_194_length_9305_cov_2.225430	3732	4568	APH(6)-Id	294 6224	1620 7043	IS5075 IS26
	NODE_194_length_9305_cov_2.225430	5289	6149	TEM-1	294 6224	1620 7043	IS5075 IS26
FGL20240223NXQR100WGS1575_S360_Citrobacter_werkmanii	NODE_34_length_46666_cov_4.798930	35306	36136	OXA-1	39458	40337	IS6100
	NODE_34_length_46666_cov_4.798930	36261	37040	aadA2	39458	40337	IS6100
	NODE_34_length_46666_cov_4.798930	37545	38384	sul1	39458	40337	IS6100
FGL20240223NXQR100WGS1577_S362_Escherichia_coli	NODE_51_length_8822_cov_3.791029	1155	1811	QnrS1	3087	5937	ISKpn19
	NODE_51_length_8822_cov_3.791029	7770	8567	OXA-484	3087	5937	ISKpn19
FGL20240223NXQR100WGS1578_S363_Aeromonas_veronii	NODE_17_length_88756_cov_4.299834	32649	33436	OXA-12	1410	4022	ISAs29
FGL20240223NXQR100WGS1599_S366_Escherichia_coli	NODE_61_length_10582_cov_200.907508	559	1464	mphA	3722	4601	IS6100
	NODE_61_length_10582_cov_200.907508	6775	7614	sul1	3722	4601	IS6100
	NODE_61_length_10582_cov_200.907508	8161	8949	aadA5	3722	4601	IS6100
	NODE_61_length_10582_cov_200.907508	9080	9553	dfrA17	3722	4601	IS6100
FGL20240223NXQR100WGS1603_S370_Enterobacter_hormaechei	NODE_158_length_11286_cov_5.578009	10152	11012	TEM-1	6210	11159	Tn2
	NODE_185_length_7429_cov_5.030266	5680	6162	dfrA14	4232	5111	IS6100
FGL20240223NXQR100WGS1607_S374_Escherichia_coli	NODE_106_length_6038_cov_4.246320	1447	2250	APH(3'')-Ib	147	1378	IS1133
	NODE_106_length_6038_cov_4.246320	2250	3086	APH(6)-Id	147	1378	IS1133
	NODE_106_length_6038_cov_4.246320	3935	4795	TEM-1	147	1378	IS1133
	NODE_90_length_10165_cov_4.337916	196	1098	mphA	3368	4247	IS6100
	NODE_90_length_10165_cov_4.337916	6421	7260	sul1	3368	4247	IS6100
	NODE_90_length_10165_cov_4.337916	7807	8595	aadA5	3368	4247	IS6100
	NODE_90_length_10165_cov_4.337916	8726	9199	dfrA17	3368	4247	IS6100
FGL20240223NXQR100WGS1608_S375_Enterobacter_cloacae	NODE_9_length_13476_cov_1.554424	4591	4956	determinant_of_bleomycin_resistance	5967	6222	MITESen1
	NODE_9_length_13476_cov_1.554424	4960	5772	NDM-1	5967	6222	MITESen1
	NODE_9_length_13476_cov_1.554424	6330	7175	rmtC	5967	6222	MITESen1
FGL20240223NXQR100WGS1610_S377_Proteus_mirabilis	NODE_19_length_62765_cov_10.881095	56563	57402	sul1	54610	55489	IS6100
	NODE_19_length_62765_cov_10.881095	59653	60701	tet(A)	54610	55489	IS6100
	NODE_19_length_62765_cov_10.881095	60841	61680	sul1	54610	55489	IS6100
	NODE_73_length_19250_cov_12.156722	3441	4100	catI	8338 4324 7335 6423	9105 5091 8337 7285	ISSen9 ISSen9 ISEcl3 ISPrst3
FGL20240223NXQR100WGS1611_S378_Escherichia_coli	NODE_101_length_6117_cov_2.477129	1490	2293	APH(3'')-Ib	190	1421	IS1133
	NODE_101_length_6117_cov_2.477129	2293	3129	APH(6)-Id	190	1421	IS1133
	NODE_101_length_6117_cov_2.477129	3978	4838	TEM-1	190	1421	IS1133
	NODE_83_length_15785_cov_2.835483	639	1541	mphA	3811	4690	IS6100
	NODE_83_length_15785_cov_2.835483	6864	7703	sul1	3811	4690	IS6100
	NODE_83_length_15785_cov_2.835483	9280	10419	DHA-1	3811	4690	IS6100
	NODE_83_length_15785_cov_2.835483	14540	15187	QnrB4	3811	4690	IS6100
FGL20240223NXQR100WGS1613_S380_Enterobacter_roggenkampii	NODE_142_length_12095_cov_2.816511	298	1182	mphE	3078 6055	4402 6951	ISEc29 ISEc28
	NODE_142_length_12095_cov_2.816511	1238	2713	msrE	3078 6055	4402 6951	ISEc29 ISEc28
	NODE_142_length_12095_cov_2.816511	9130	9969	sul1	3078 6055	4402 6951	ISEc29 ISEc28
FGL20240223NXQR100WGS1614_S381_Acinetobacter_baumannii	NODE_60_length_15063_cov_3.598755	4091	4975	mphE	6871	8195	ISEc29
	NODE_60_length_15063_cov_3.598755	5031	6506	msrE	6871	8195	ISEc29
	NODE_84_length_6906_cov_3.581354	313	1512	tet(B)	2824	3800	ISVsa3
	NODE_84_length_6906_cov_3.581354	4885	5721	APH(6)-Id	2824	3800	ISVsa3
	NODE_84_length_6906_cov_3.581354	5721	6524	APH(3'')-Ib	2824	3800	ISVsa3
FGL20240223NXQR100WGS1615_S382_Citrobacter_werkmanii	NODE_137_length_12669_cov_2.837586	11363	12330	ANT(3'')-IIa	93	1415	ISLead2
	NODE_39_length_36367_cov_1.880436	11703	12542	sul1	1	1207	IS5075
	NODE_39_length_36367_cov_1.880436	14119	15258	DHA-1	1	1207	IS5075
	NODE_39_length_36367_cov_1.880436	19379	20026	QnrB4	1	1207	IS5075
FGL20240223NXQR100WGS1616_S383_Proteus_mirabilis	NODE_3_length_100042_cov_4.246469	44919	45734	sul2	48269 43380	51480 44612	ISShfr9 ISVch12
	NODE_3_length_100042_cov_4.246469	45795	46598	APH(3'')-Ib	48269 43380	51480 44612	ISShfr9 ISVch12
	NODE_3_length_100042_cov_4.246469	46598	47434	APH(6)-Id	48269 43380	51480 44612	ISShfr9 ISVch12
R87_S80_Enterococcus_faecium	NODE_15_length_49220_cov_18.217587	25033	25581	AAC(6')-Ii	38886	40209	IS256
	NODE_6_length_73657_cov_18.262451	24840	26759	tetM	30059	31118	IS1062
	NODE_6_length_73657_cov_18.262451	26888	28230	tet(L)	30059	31118	IS1062
R87_S84_Enterococcus_faecium	NODE_18_length_50545_cov_3.683546	13444	13992	AAC(6')-Ii	46905	48370	IS16
	NODE_33_length_26677_cov_5.023578	14949	16291	tet(L)	12061	13120	IS1062
	NODE_33_length_26677_cov_5.023578	16420	18339	tetM	12061	13120	IS1062
R87_S88_Enterococcus_faecium	NODE_53_length_13641_cov_18.738123	12065	12895	aad(6)	12741	13556	Tn5405
R87_S94_Enterococcus_faecium	NODE_61_length_14301_cov_33.250247	145	1299	vanSA	2024	3347	ISEnfa4
	NODE_61_length_14301_cov_33.250247	1277	1972	vanRA	2024	3347	ISEnfa4
R91_S91_Enterococcus_faecium	NODE_9_length_56922_cov_37.209032	31845	32576	ErmA	30443	37129	Tn554
R94_S126_Enterococcus_raffinosus	NODE_37_length_31049_cov_12.232294	13011	14930	tetM	9195	11083	Tn6009
R94_S126_Enterococcus_raffinosus	NODE_59_length_9852_cov_9.593111	5950	6780	aad(6)	3881 6626	5213 7441	Tn5405 Tn5405
	NODE_59_length_9852_cov_9.593111	7412	8206	APH(3')-IIIa	3881 6626	5213 7441	Tn5405 Tn5405
R94_S134_Enterococcus_faecium	NODE_38_length_22829_cov_13.615232	4297	4782	vanZA	4047	14897	Tn1546
	NODE_38_length_22829_cov_13.615232	4935	5846	vanYA	4047	14897	Tn1546
	NODE_38_length_22829_cov_13.615232	6274	6882	vanXA	4047	14897	Tn1546
	NODE_38_length_22829_cov_13.615232	6888	7919	vanA	4047	14897	Tn1546
	NODE_38_length_22829_cov_13.615232	7912	8880	vanHA	4047	14897	Tn1546
	NODE_38_length_22829_cov_13.615232	9095	10249	vanSA	4047	14897	Tn1546
	NODE_38_length_22829_cov_13.615232	10227	10922	vanRA	4047	14897	Tn1546
R94_S135_Enterococcus_faecium	NODE_12_length_58839_cov_8.937083	51826	52620	APH(3')-IIIa	54819 52591	56151 53406	Tn5405 Tn5405
	NODE_12_length_58839_cov_8.937083	53252	54082	aad(6)	54819 52591	56151 53406	Tn5405 Tn5405
	NODE_12_length_58839_cov_8.937083	57411	58156	ErmB	54819 52591	56151 53406	Tn5405 Tn5405
FGL20240223NXQR100WGS1549_S334_Enterococcus_faecium	NODE_5_length_71790_cov_14.885562	34746	36224	msrC	5597	6921	ISEfm2

## Sheet: S8b
Table S8b: ARGs associated with plasmid in sewage isolates
Sample	NUM_FOUND	Col(BS512)_1	Col(MG828)_1	Col156_1	Col3M_1	Col440II_1	Col440I_1	Col8282_1	ColKP3_1	ColRNAI_1	ColpVC_1	IncA/C2_1	IncB/O/K/Z_2	IncFIA(HI1)_1_HI1	IncFIA_1	IncFIB(AP001918)_1	IncFIB(K)_1_Kpn3	IncFIB(Mar)_1_pNDM-Mar	IncFIB(S)_1	IncFIB(pB171)_1_pB171	IncFIB(pECLA)_1_pECLA	IncFIB(pHCM2)_1_pHCM2	IncFIB(pKPHS1)_1_pKPHS1	IncFIB(pQil)_1_pQil	IncFIC(FII)_1	IncFII(S)_1	IncFII(SARC14)_1_SARC14	IncFII(Yp)_1_Yersenia	IncFII(p14)_1_p14	IncFII(pAMA1167-NDM-5)_1_pAMA1167-NDM-5	IncFII(pCRY)_1_pCRY	IncFII(pCoo)_1_pCoo	IncFII(pECLA)_1_pECLA	IncFII(pHN7A8)_1_pHN7A8	IncFII(pRSB107)_1_pRSB107	IncFII_1	IncFII_1_pKP91	IncHI1B_1_pNDM-MAR	IncHI2A_1	IncHI2_1	IncI1_1_Alpha	IncI2_1_Delta	IncI_Gamma_1	IncN3_1	IncN_1	IncP6_1	IncR_1	IncX1_1	IncX3_1
R87_S37_Proteus_mirabilis	1	.	.	.	100	.	.	.	.	.	.	.	.	.	.	.	.	.	.	.	.	.	.	.	.	.	.	.	.	.	.	.	.	.	.	.	.	.	.	.	.	.	.	.	.	.	.	.	.
R87_S43_Escherichia_coli	1	.	.	.	.	.	.	.	.	.	.	.	.	.	.	.	.	.	.	.	.	.	.	.	.	.	.	.	.	.	.	.	.	.	.	.	.	.	.	.	.	.	.	.	.	.	100	.	.
R87_S51_Escherichia_coli	6	.	96.18	.	.	.	.	100.00;100.00	.	.	.	.	.	.	100	100	.	.	.	.	.	.	.	.	.	.	.	.	.	100	.	.	.	.	.	.	.	.	.	.	.	.	97.16	.	.	.	.	.	.
R87_S54_Enterobacter_roggenkampii	3	.	.	.	.	.	100.00;100.00;100.00	.	.	.	.	.	.	.	.	.	.	.	.	.	100	.	.	.	.	.	.	.	.	.	.	.	98.8	.	.	.	.	.	.	.	.	.	.	.	.	.	.	.	.
R87_S57_Enterobacter_roggenkamppii	1	.	.	.	.	.	99.12	.	.	.	.	.	.	.	.	.	.	.	.	.	.	.	.	.	.	.	.	.	.	.	.	.	.	.	.	.	.	.	.	.	.	.	.	.	.	.	.	.	.
R87_S77_Enterobacter_sp	4	.	.	.	.	.	.	.	.	.	.	.	.	.	.	.	.	.	.	.	100	.	.	.	.	.	.	.	.	.	.	.	82.73;100.00	.	.	.	.	.	100	100	.	.	.	.	.	.	.	.	.
R87_S78_Escherichia_coli	8	.	.	.	.	.	.	.	81.79	.	100	.	.	.	100	100	.	.	.	.	.	.	.	.	.	.	.	.	.	100	.	.	.	.	.	.	.	.	.	.	.	.	97.16	.	.	.	.	.	100
R91_S71_Escherichia_coli	5	97	.	.	.	.	.	100	.	.	.	.	.	.	.	100	.	.	.	.	.	.	.	.	.	.	.	.	.	.	.	.	.	.	.	100	.	.	.	.	100	.	.	.	.	.	.	.	.
R91_S72_Escherichia_coli	9	100	.	100	.	.	97.37	.	.	100	100	.	.	.	100	100	.	.	.	.	.	.	.	.	.	.	.	.	.	.	.	.	.	.	100	.	.	.	.	.	.	100	.	.	.	.	.	.	.
R91_S73_Citrobacter_freundii	1	.	.	.	.	.	.	.	.	.	.	.	.	.	.	.	.	.	.	.	.	.	.	.	.	.	.	.	.	.	.	.	.	.	.	.	.	.	.	.	.	.	.	.	.	.	100	.	.
R91_S76_Escherichia_coli	5	.	.	98.70;100.00	.	.	.	100	.	.	.	.	94.38	.	.	.	.	.	.	.	.	.	.	.	.	.	.	.	.	.	.	.	.	.	.	.	.	.	.	.	100	.	.	.	.	.	.	.	.
R91_S77_Escherichia_coli	2	.	.	.	.	.	.	.	.	.	.	.	.	.	.	100	.	.	.	.	.	.	.	.	99.6	.	.	.	.	.	.	.	.	.	.	.	.	.	.	.	.	.	.	.	.	.	.	.	.
R91_S79_Escherichia_coli	3	.	.	.	.	.	.	100	.	.	.	.	.	.	.	100	.	.	.	.	.	.	.	.	.	.	.	.	.	.	.	.	.	.	.	.	.	.	.	.	100	.	.	.	.	.	.	.	.
R94_S84_Escherichia_coli	1	.	.	.	.	.	97.37	.	.	.	.	.	.	.	.	.	.	.	.	.	.	.	.	.	.	.	.	.	.	.	.	.	.	.	.	.	.	.	.	.	.	.	.	.	.	.	.	.	.
R94_S85_Klebsiella_quasipneumoniae	7	.	.	.	.	100.00;99.65	100.00;100.00;100.00;100.00	.	.	.	.	.	.	.	.	.	100	.	.	.	.	.	.	100	.	.	.	.	.	.	.	.	.	.	.	.	.	100	.	.	.	.	.	.	100	.	100	.	.
R94_S87_Escherichia_coli	3	.	100.00;80.15;80.15	.	.	.	.	.	.	.	.	.	.	.	.	100	.	.	.	.	.	.	.	.	.	.	.	.	.	.	.	.	.	.	.	.	.	.	.	.	.	.	.	.	.	.	.	.	.
R94_S88_Klebsiella_pneumoniae	3	.	.	.	.	.	.	.	.	.	.	.	.	100	.	.	100	.	.	.	.	.	100	.	.	.	.	.	.	.	.	.	.	.	.	.	.	.	.	.	.	.	.	.	.	.	.	.	.
R94_S90_Escherichia_coli	1	.	100	.	.	.	.	.	.	.	.	.	.	.	.	.	.	.	.	.	.	.	.	.	.	.	.	.	.	.	.	.	.	.	.	.	.	.	.	.	.	.	.	.	.	.	.	.	.
R94_S92_Klebsiella_pneumoniae	4	.	.	.	.	99.65	96.49	.	.	.	.	.	.	100	.	.	100	.	.	.	.	.	.	.	.	.	.	.	.	.	.	.	.	.	.	.	.	.	.	.	.	.	.	.	.	.	.	.	.
R94_S94_Klebsiella_pneumoniae	3	.	.	.	.	.	100.00;100.00;100.00;100.00	.	.	.	.	.	.	100	.	.	100	.	.	.	.	.	.	.	.	.	.	.	.	.	.	.	.	.	.	.	.	.	.	.	.	.	.	.	.	.	.	.	.
R94_S95_Escherichia_coli	1	.	.	.	.	.	.	.	.	.	.	.	.	.	100	.	.	.	.	.	.	.	.	.	.	.	.	.	.	.	.	.	.	.	.	.	.	.	.	.	.	.	.	.	.	.	.	.	.
R94_S96_Klebsiella_pneumoniae	3	.	.	.	.	.	100	.	.	.	.	.	.	.	.	.	100	.	.	.	.	.	100	.	.	.	.	.	.	.	.	.	.	.	.	.	.	.	.	.	.	.	.	.	.	.	.	.	.
R94_S98_Escherichia_coli	1	.	.	.	.	.	.	.	.	.	.	.	.	.	.	.	.	.	.	.	.	.	.	.	.	.	.	.	.	.	.	.	.	.	.	.	.	.	.	.	.	.	.	.	.	.	100	.	.
R94_S101_Escherichia_coli	5	.	.	.	.	.	.	.	.	81.54	.	.	.	.	100	100	.	.	.	.	.	.	.	.	.	.	.	.	.	.	.	.	.	.	100	.	.	.	.	.	100	.	.	.	.	.	.	.	.
R94_S102_Escherichia_coli	5	.	.	.	.	.	.	.	.	100	.	.	.	.	100	100	.	.	.	.	.	.	.	.	.	.	.	.	.	.	.	.	.	.	.	100	.	.	.	.	100	.	.	.	.	.	.	.	.
R94_S104_Klebsiella_pneumoniae	6	.	.	.	.	.	100	.	.	.	.	.	.	99.74	.	.	100	.	.	.	.	.	100	.	.	.	.	.	.	.	.	.	.	.	.	.	.	100	.	.	.	.	.	.	.	.	100	.	.
R94_S105_Escherichia_coli	1	.	.	.	.	.	97.37	.	.	.	.	.	.	.	.	.	.	.	.	.	.	.	.	.	.	.	.	.	.	.	.	.	.	.	.	.	.	.	.	.	.	.	.	.	.	.	.	.	.
R94_S106_Escherichia_coli	4	.	.	.	.	.	96.49;96.49	.	.	.	.	.	.	.	98.97	100	.	.	.	.	.	.	.	.	.	.	.	.	.	.	.	.	.	.	.	.	.	.	.	.	.	.	.	.	.	.	.	.	.
R94_S109_Escherichia_coli	1	.	100	.	.	.	.	.	.	.	.	.	.	.	.	.	.	.	.	.	.	.	.	.	.	.	.	.	.	.	.	.	.	.	.	.	.	.	.	.	.	.	.	.	.	.	.	.	.
R94_S110_Klebsiella_pneumoniae	3	.	.	.	.	.	100	.	.	.	.	.	.	.	.	.	100	.	.	.	.	.	.	.	.	.	.	.	.	.	.	.	.	.	.	.	.	100	.	.	.	.	.	.	.	.	.	.	.
R94_S111_Escherichia_coli	3	100	.	.	.	.	.	.	.	.	.	.	.	.	100	100	.	.	.	.	.	.	.	.	.	.	.	.	.	.	.	.	.	.	.	.	.	.	.	.	.	.	.	.	.	.	.	.	.
R94_S112_Escherichia_coli	1	.	.	.	.	.	.	.	.	.	.	.	.	.	.	.	.	.	.	.	.	.	.	.	.	.	.	.	.	.	.	.	.	.	.	.	.	.	.	.	.	.	97.16	.	.	.	.	.	.
R94_S113_Escherichia_coli	4	.	98.47	.	.	.	.	.	.	.	.	.	.	.	.	100	.	.	.	.	.	.	.	.	99.6	.	.	.	.	.	.	.	.	.	.	.	.	.	.	.	100	.	.	.	.	.	.	.	.
R94_S116_Escherichia_coli	6	100	.	100	.	.	.	.	.	100	.	.	.	.	98.71	100	.	.	.	.	.	.	.	.	.	.	.	.	.	.	.	.	.	.	100	.	.	.	.	.	.	.	.	.	.	.	.	.	.
R94_S119_Citrobacter_werkmanii	1	.	.	.	.	.	.	.	.	.	.	.	.	.	.	.	.	.	.	.	.	.	.	.	.	.	.	.	.	.	.	.	.	.	.	.	.	.	.	.	.	.	.	.	.	.	.	.	.
R94_S120_Proteus_vulgaris	1	.	.	.	98.09;100.00;98.09	.	.	.	.	.	.	.	.	.	.	.	.	.	.	.	.	.	.	.	.	.	.	.	.	.	.	.	.	.	.	.	.	.	.	.	.	.	.	.	.	.	.	.	.
R94_S136_Providencia_rettgeri	1	.	.	.	100	.	.	.	.	.	.	.	.	.	.	.	.	.	.	.	.	.	.	.	.	.	.	.	.	.	.	.	.	.	.	.	.	.	.	.	.	.	.	.	.	.	.	.	.
R94_S138_Klebsiella_pneumoniae	6	.	.	.	.	.	100	.	.	.	98.96	.	.	99.74	.	.	100	.	.	.	.	.	.	.	.	.	.	.	.	.	.	.	.	.	.	.	.	100	.	.	.	.	.	.	.	.	100	.	.
R94_S139_Escherichia_coli	6	.	.	100.00;100.00	.	.	.	.	81.79	.	.	.	.	.	100	100	.	.	.	.	.	.	.	.	.	.	.	.	.	.	.	.	.	.	.	100	.	.	.	.	.	.	97.16	.	.	.	.	.	.
R94_S140_Citrobacter_werkmanii	3	.	.	.	.	.	.	.	.	.	.	.	.	.	.	.	.	.	.	100	.	.	.	.	.	.	.	100	.	.	.	.	.	.	.	.	.	.	.	.	.	.	.	.	.	.	.	.	.
R94_S142_Escherichia_coli	6	.	.	100	.	.	.	.	81.79	.	.	.	.	.	100	100	.	.	.	.	.	.	.	.	.	.	.	.	.	.	.	.	.	.	.	100	.	.	.	.	.	.	97.16	.	.	.	.	.	.
R94_S143_Escherichia_coli	6	.	.	.	.	.	.	.	.	.	.	.	.	.	99.74	100	.	.	.	.	.	.	.	.	.	.	.	.	.	100	.	.	.	.	.	.	.	.	100	100	100	.	.	.	.	.	.	.	.
R94_S144_Klebsiella_pneumoniae	4	.	.	.	.	.	100	.	.	.	.	.	.	.	.	.	100	.	.	.	.	.	.	.	.	.	.	.	.	.	.	.	.	.	.	.	100	.	.	.	.	.	.	.	.	.	100	.	.
R94_S145_Escherichia_coli	6	100.00;100.00	.	100	.	.	97.37	.	.	.	100	.	.	.	.	100	.	.	.	.	.	.	.	.	.	.	.	.	.	.	.	.	.	.	100	.	.	.	.	.	.	.	.	.	.	.	.	.	.
R94_S146_Klebsiella_pneumoniae	4	.	.	.	.	.	100	.	.	.	.	.	.	.	.	.	100	.	.	.	.	.	.	100	.	.	.	.	.	.	.	.	.	.	.	.	.	.	.	.	.	.	.	.	.	.	.	.	100
R94_S148_Escherichia_coli	2	.	.	.	.	.	.	.	.	.	.	.	.	.	.	.	.	.	.	100	.	.	.	.	.	.	.	.	.	.	.	.	.	.	100	.	.	.	.	.	.	.	.	.	.	.	.	.	.
R94_S149_Klebsiella_pneumoniae	3	.	.	.	.	.	100	.	.	.	.	.	.	99.74	.	.	100	.	.	.	.	.	.	.	.	.	.	.	.	.	.	.	.	.	.	.	.	.	.	.	.	.	.	.	.	.	.	.	.
R94_S150_Klebsiella_quasipneumoniae	4	.	.	.	.	.	97.37	.	.	.	.	.	.	99.74	.	.	.	.	.	.	.	.	.	.	.	.	.	.	.	.	.	.	.	.	.	.	.	100	.	.	.	.	.	.	.	.	100	.	.
R94_S151_Escherichia_coli	5	.	.	.	.	.	.	.	81.79	.	.	.	.	.	100	100	.	.	.	.	.	.	.	.	.	.	.	.	.	100	.	.	.	.	.	.	.	.	.	.	.	.	97.16	.	.	.	.	.	.
R94_S152_Klebsiella_quasipneumoniae	3	.	.	.	.	.	100	.	.	.	.	.	.	99.74	.	.	.	.	.	.	.	.	.	100	.	.	.	.	.	.	.	.	.	.	.	.	.	.	.	.	.	.	.	.	.	.	.	.	.
R94_S153_Escherichia_coli	3	100	.	.	.	.	.	.	.	.	100	.	.	.	.	100	.	.	.	.	.	.	.	.	.	.	.	.	.	.	.	.	.	.	.	.	.	.	.	.	.	.	.	.	.	.	.	.	.
R94_S159_Escherichia_coli	8	100	98.85;98.85;95.04;94.27	100.00;100.00;98.70;98.70	.	.	97.37	.	.	.	100.00;90.67;82.90;80.83	.	.	.	100	100	.	.	.	.	.	.	.	.	.	.	.	.	.	.	.	.	.	.	100	.	.	.	.	.	.	.	.	.	.	.	.	.	.
R94_S160_Klebsiella_quasipneumoniae	3	.	.	.	.	.	.	.	.	.	.	.	.	99.74	.	.	100	.	.	.	.	.	.	.	.	.	.	.	.	.	.	.	.	.	.	.	.	.	.	.	.	.	.	.	.	.	100	.	.
R94_S161_Escherichia_coli	7	.	.	100	.	100	.	.	.	.	.	.	.	.	98.97	.	.	.	.	100	.	.	.	.	.	.	100	.	97.71	.	.	.	.	.	.	.	.	.	.	.	.	.	.	.	.	.	.	.	.
R94_S162_Escherichia_coli	4	.	.	100	.	.	97.37	.	.	.	.	100	.	.	.	.	.	.	.	100	.	.	.	.	.	.	.	.	.	.	.	.	.	.	.	.	.	.	.	.	.	.	.	.	.	.	.	.	.
R94_S163_Escherichia_coli	2	.	.	100	.	.	.	.	81.79	.	.	.	.	.	.	.	.	.	.	.	.	.	.	.	.	.	.	.	.	.	.	.	.	.	.	.	.	.	.	.	.	.	.	.	.	.	.	.	.
R94_S164_Citrobacter_freundii	3	.	.	.	.	.	.	.	.	.	.	.	.	.	.	.	.	.	.	100	.	.	.	.	.	98.09	.	.	.	.	.	.	.	.	.	.	.	.	.	.	.	.	.	.	.	100	.	.	.
R94_S165_Escherichia_coli	7	100	.	.	.	99.65	.	.	.	.	100	.	.	.	100	100	.	.	.	.	.	.	.	.	.	.	.	.	.	100	.	.	.	.	.	.	.	.	.	.	.	.	97.16	.	.	.	.	.	.
R94_S167_Klebsiella_pneumoniae	3	.	.	.	.	.	100.00;96.49;100.00	.	.	.	.	.	.	.	.	.	100	.	.	.	.	.	.	.	.	.	.	.	.	.	.	.	.	.	.	.	.	.	.	.	.	.	.	.	.	.	100	.	.
R94_S168_Escherichia_coli	4	.	99.24	.	.	.	.	.	.	.	.	.	.	.	.	.	.	.	.	.	.	.	.	.	.	.	.	.	.	.	.	.	.	100	.	.	.	.	.	.	.	.	.	.	.	.	.	100	.
R94_S170_Escherichia_coli	6	.	.	100	.	.	.	.	81.79	.	.	.	.	.	100	100	.	.	.	.	.	.	.	.	.	.	.	.	.	.	.	.	.	.	.	100	.	.	.	.	.	.	97.16	.	.	.	.	.	.
R94_S171_Escherichia_coli	1	.	.	.	.	.	.	.	.	.	.	.	.	.	.	100	.	.	.	.	.	.	.	.	.	.	.	.	.	.	.	.	.	.	.	.	.	.	.	.	.	.	.	.	.	.	.	.	.
R94_S173_Escherichia_coli	5	.	.	100	.	.	.	.	.	.	.	.	.	.	100	100	.	.	.	.	.	.	.	.	.	.	.	.	.	.	.	.	.	.	.	100	.	.	.	.	.	.	97.16	.	.	.	.	.	.
R94_S174_Klebsiella_pneumoniae	4	.	.	.	.	99.65	96.49	.	.	.	.	.	.	99.74	.	.	.	.	.	.	.	.	.	.	.	.	.	.	.	.	.	.	.	.	.	.	.	.	.	.	.	.	.	.	.	.	100	.	.
R94_S176_Escherichia_coli	6	.	.	100	.	.	.	.	81.79	.	.	.	.	.	100	100	.	.	.	.	.	.	.	.	.	.	.	.	.	.	.	.	.	.	.	100	.	.	.	.	.	.	97.16	.	.	.	.	.	.
R94_S178_Escherichia_coli	9	100	100.00;100.00	100	.	.	97.37	.	.	100	100	.	.	.	100	100	.	.	.	.	.	.	.	.	.	.	.	.	.	.	.	.	.	.	100	.	.	.	.	.	.	.	.	.	.	.	.	.	.
R94_S179_Escherichia_coli	7	100	98.47;100.00;100.00;100.00	100	.	.	97.37	.	.	100	.	.	.	.	.	100	.	.	.	.	.	.	.	.	.	.	.	.	.	.	.	.	.	.	100	.	.	.	.	.	.	.	.	.	.	.	.	.	.
R94_S180_Escherichia_coli	5	100	95.8	.	.	.	100	.	.	.	.	.	96.25	.	.	.	.	.	.	.	.	.	.	.	.	.	.	.	.	.	.	.	.	.	99.23	.	.	.	.	.	.	.	.	.	.	.	.	.	.
R94_S181_Escherichia_coli	4	.	100	.	.	.	.	.	.	.	.	.	.	.	.	.	.	.	.	100	.	.	.	.	.	.	.	.	.	.	.	.	.	.	100	.	.	.	.	.	100	.	.	.	.	.	.	.	.
R94_S183_Escherichia_coli	5	100	100	.	.	.	97.37	.	.	.	.	100	.	.	.	.	.	.	.	.	.	.	.	.	.	.	.	.	.	.	.	.	.	.	.	.	.	.	.	.	.	.	.	100	.	.	.	.	.
R94_S185_Escherichia_coli	6	100	100	100	.	.	100	.	.	.	.	.	.	.	.	100	.	.	.	.	.	.	.	.	.	.	.	.	.	.	.	.	.	.	100	.	.	.	.	.	.	.	.	.	.	.	.	.	.
R94_S187_Escherichia_coli	2	.	.	.	.	.	.	.	.	.	.	.	.	.	.	100	.	.	.	.	.	.	.	.	.	.	.	.	.	.	.	.	.	.	.	.	.	.	.	.	.	.	.	.	.	.	.	.	.
R94_S189_Klebsiella_pneumoniae	7	.	.	.	.	.	.	.	.	.	.	.	.	99.74;100.00	.	.	100	100	.	.	.	.	100	.	.	.	.	.	.	.	.	.	.	.	.	.	.	100	.	.	.	.	.	.	.	.	100	.	.
R94_S191_Escherichia_coli	3	100	98.85	.	.	.	.	.	.	.	.	.	.	.	100	.	.	.	.	.	.	.	.	.	.	.	.	.	.	.	.	.	.	.	.	.	.	.	.	.	.	.	.	.	.	.	.	.	.
R94_S194_Klebsiella_pneumoniae	5	.	.	.	.	.	100	.	.	.	92.23	.	.	99.74	.	.	100	.	.	.	.	.	.	.	.	.	.	.	.	.	.	.	.	.	.	.	.	.	.	.	.	.	.	.	.	.	100	.	.
R94_S196_Klebsiella_pneumoniae	5	.	.	.	.	.	100.00;100.00	.	100	.	.	.	.	99.74	.	.	.	.	.	.	.	.	100	.	.	.	.	.	.	.	.	.	.	.	.	.	.	.	.	.	.	.	.	.	.	.	100	.	.
R94_S198_Escherichia_coli	4	.	.	.	.	.	96.49	.	.	.	.	.	.	.	98.97	.	.	.	.	.	.	.	.	.	.	.	.	.	.	.	.	.	.	.	.	100	.	.	.	.	.	.	97.16	.	.	.	.	.	.
R94_S199_Escherichia_coli	3	.	.	.	.	.	.	.	.	.	.	.	.	.	.	100	.	.	.	.	.	.	.	.	.	.	.	.	.	.	.	.	.	.	.	.	.	.	.	.	.	.	.	.	100	.	.	.	.
R94_S200_Klebsiella_pneumoniae	2	.	.	.	.	.	.	.	.	.	.	.	.	.	.	.	100	.	.	.	.	.	.	.	.	.	.	.	.	.	.	.	.	.	.	.	.	.	.	.	.	.	.	.	.	.	100	.	.
R94_S203_Escherichia_coli	4	.	.	100	.	.	.	.	.	.	.	.	.	.	.	.	.	.	.	.	.	.	.	.	.	.	.	.	.	.	.	.	.	.	.	.	.	.	.	.	100	.	.	.	.	.	.	100	.
R94_S205_Escherichia_coli	4	.	.	.	.	.	.	.	81.79	.	.	.	.	.	100	100	.	.	.	.	.	.	.	.	.	.	.	.	.	.	.	.	.	.	.	.	.	.	.	.	.	.	97.16	.	.	.	.	.	.
R94_S206_Escherichia_coli	5	.	.	100	.	.	.	.	.	.	.	.	.	.	100	100	.	.	.	.	.	.	.	.	.	.	.	.	.	.	.	.	.	.	100	.	.	.	.	.	.	.	.	.	.	.	.	.	.
FGL20240223NXQR100WGS1472_S258_Klebsiella_pneumoniae	4	.	.	.	.	.	.	.	.	.	.	.	.	99.74	.	.	100	.	.	.	.	.	100	.	.	.	.	.	.	.	.	.	.	.	.	.	.	.	.	.	.	.	.	.	.	.	100	.	.
FGL20240223NXQR100WGS1476_S262_Klebsiella_pneumoniae	3	.	.	.	.	100	100	.	.	.	.	.	.	.	.	.	100	.	.	.	.	.	.	.	.	.	.	.	.	.	.	.	.	.	.	.	.	.	.	.	.	.	.	.	.	.	.	.	.
FGL20240223NXQR100WGS1477_S263_Enterobacter_hormaechei	3	.	.	.	.	.	.	.	.	.	.	.	.	.	.	.	.	.	.	.	100	100	.	.	.	.	.	.	.	.	.	.	100	.	.	.	.	.	.	.	.	.	.	.	.	.	.	.	.
FGL20240223NXQR100WGS1479_S265_Klebsiella_pneumoniae	4	.	.	.	.	.	100.00;97.37	.	.	.	.	.	.	99.74	.	.	.	.	.	.	.	.	.	100	.	.	.	.	.	.	.	.	.	.	.	.	.	.	.	.	.	.	.	.	.	.	100	.	.
FGL20240223NXQR100WGS1483_S269_Proteus_mirabilis	1	.	.	.	100	.	.	.	.	.	.	.	.	.	.	.	.	.	.	.	.	.	.	.	.	.	.	.	.	.	.	.	.	.	.	.	.	.	.	.	.	.	.	.	.	.	.	.	.
FGL20240223NXQR100WGS1484_S270_Proteus_mirabilis	1	.	.	.	100	.	.	.	.	.	.	.	.	.	.	.	.	.	.	.	.	.	.	.	.	.	.	.	.	.	.	.	.	.	.	.	.	.	.	.	.	.	.	.	.	.	.	.	.
FGL20240223NXQR100WGS1486_S272_Klebsiella_pneumoniae	3	.	.	.	.	.	100.00;100.00	.	.	.	.	.	.	.	.	.	100	.	.	.	.	.	.	.	.	.	.	.	.	.	.	.	.	.	.	.	96.09	.	.	.	.	.	.	.	.	.	.	.	.
FGL20240223NXQR100WGS1489_S275_Escherichia_coli	5	.	100	.	.	.	.	.	.	.	.	.	95.62	.	93.56	100	.	.	.	.	.	.	.	.	.	.	.	.	.	.	.	.	.	.	.	100	.	.	.	.	.	.	.	.	.	.	.	.	.
FGL20240223NXQR100WGS1490_S276_Klebsiella_pneumoniae	4	.	.	.	.	.	100.00;100.00	.	.	.	.	.	.	100	.	.	100	.	.	.	.	.	.	.	.	.	.	.	.	.	.	.	.	.	.	.	96.09	.	.	.	.	.	.	.	.	.	.	.	.
FGL20240223NXQR100WGS1493_S279_Enterobacter_hormaechei	3	.	.	.	.	.	.	.	.	.	.	.	.	.	.	.	.	.	.	.	100	100	.	.	.	.	.	.	.	.	.	.	100	.	.	.	.	.	.	.	.	.	.	.	.	.	.	.	.
FGL20240223NXQR100WGS1494_S280_Klebsiella_pneumoniae	2	.	.	.	.	.	96.49;100.00	.	.	.	.	.	.	.	.	.	100	.	.	.	.	.	.	.	.	.	.	.	.	.	.	.	.	.	.	.	.	.	.	.	.	.	.	.	.	.	.	.	.
FGL20240223NXQR100WGS1496_S282_Klebsiella_pneumoniae	5	.	.	.	.	.	100	.	.	.	100	.	.	.	.	.	100	100	.	.	.	.	.	.	.	.	.	.	.	.	.	.	.	.	.	.	.	100	.	.	.	.	.	.	.	.	.	.	.
FGL20240223NXQR100WGS1498_S284_Proteus_mirabilis	1	.	.	.	82.8	.	.	.	.	.	.	.	.	.	.	.	.	.	.	.	.	.	.	.	.	.	.	.	.	.	.	.	.	.	.	.	.	.	.	.	.	.	.	.	.	.	.	.	.
FGL20240223NXQR100WGS1503_S289_Klebsiella_pneumoniae	2	.	.	.	.	.	.	.	.	.	.	.	.	99.74	.	.	.	.	.	.	.	.	.	.	.	.	.	.	.	.	.	.	.	.	.	.	.	.	.	.	.	.	.	.	.	.	100	.	.
FGL20240223NXQR100WGS1505_S291_Enterobacter_roggenkampii	1	.	.	.	.	.	.	.	.	.	.	.	.	.	.	.	.	.	.	.	.	.	.	.	.	.	.	100	.	.	.	.	.	.	.	.	.	.	.	.	.	.	.	.	.	.	.	.	.
FGL20240223NXQR100WGS1506_S292_Escherichia_coli	4	100	96.95	.	.	.	97.37	.	.	.	100	.	.	.	.	.	.	.	.	.	.	.	.	.	.	.	.	.	.	.	.	.	.	.	.	.	.	.	.	.	.	.	.	.	.	.	.	.	.
FGL20240223NXQR100WGS1508_S294_Escherichia_coli	3	.	.	.	.	.	.	.	.	.	.	.	.	.	100	100	.	.	.	.	.	.	.	.	.	.	.	.	.	100	.	.	.	.	.	.	.	.	.	.	.	.	.	.	.	.	.	.	.
FGL20240223NXQR100WGS1510_S296_Escherichia_coli	4	100	.	.	.	.	.	.	.	.	.	.	.	.	100	100	.	.	.	.	.	.	.	.	.	.	.	.	.	100	.	.	.	.	.	.	.	.	.	.	.	.	.	.	.	.	.	.	.
FGL20240223NXQR100WGS1512_S298_Klebsiella_pneumoniae	2	.	.	.	.	.	.	.	.	.	.	.	.	.	.	.	100	.	.	.	.	.	100	.	.	.	.	.	.	.	.	.	.	.	.	.	.	.	.	.	.	.	.	.	.	.	.	.	.
FGL20240223NXQR100WGS1513_S299_Escherichia_coli	7	100	100	.	.	.	96.49	.	.	.	.	.	95.62	.	93.56	100	.	.	.	.	.	.	.	.	.	.	.	.	.	.	.	.	.	.	.	100	.	.	.	.	.	.	.	.	.	.	.	.	.
FGL20240223NXQR100WGS1517_S303_Klebsiella_pneumoniae	1	.	.	.	.	.	.	.	.	.	.	.	.	.	.	.	100	.	.	.	.	.	.	.	.	.	.	.	.	.	.	.	.	.	.	.	.	.	.	.	.	.	.	.	.	.	.	.	.
FGL20240223NXQR100WGS1519_S305_Klebsiella_pneumoniae	1	.	.	.	.	.	.	.	.	.	.	.	.	.	.	.	100	.	.	.	.	.	.	.	.	.	.	.	.	.	.	.	.	.	.	.	.	.	.	.	.	.	.	.	.	.	.	.	.
FGL20240223NXQR100WGS1520_S306_Escherichia_coli	5	.	100	.	.	.	.	.	.	.	.	.	95.62	.	93.56	100	.	.	.	.	.	.	.	.	.	.	.	.	.	.	.	.	.	.	.	100	.	.	.	.	.	.	.	.	.	.	.	.	.
FGL20240223NXQR100WGS1523_S309_Klebsiella_pneumoniae	2	.	.	.	.	.	96.49	.	.	.	.	.	.	.	.	.	100	.	.	.	.	.	.	.	.	.	.	.	.	.	.	.	.	.	.	.	.	.	.	.	.	.	.	.	.	.	.	.	.
FGL20240223NXQR100WGS1524_S310_Escherichia_coli	8	100	100.00;100.00	100	.	100	.	.	.	.	.	.	.	.	100	100	.	.	.	.	.	.	.	.	.	.	.	.	.	.	.	.	.	.	100	.	.	.	.	.	.	.	.	.	.	.	.	.	.
FGL20240223NXQR100WGS1527_S313_Escherichia_coli	5	100	.	.	.	.	.	.	.	.	100	.	.	.	100	100	.	.	.	.	.	.	.	.	.	.	.	.	.	100	.	.	.	.	.	.	.	.	.	.	.	.	.	.	.	.	.	.	.
FGL20240223NXQR100WGS1529_S315__Escherichia_coli	4	.	100	.	.	.	.	.	.	.	.	.	.	.	100	100	.	.	.	.	.	.	.	.	.	.	.	.	.	.	.	.	.	.	100	.	.	.	.	.	.	.	.	.	.	.	.	.	.
FGL20240223NXQR100WGS1539_S324_Escherichia_coli	7	100	98.47	100	.	.	.	.	.	.	.	.	.	.	100	100	.	.	.	.	.	.	.	.	.	.	.	.	.	.	.	.	.	.	100	.	.	.	.	.	.	.	.	.	.	.	.	.	.
FGL20240223NXQR100WGS1542_S327_Enterobacter_roggenkampii	1	.	.	.	.	.	.	.	.	.	.	.	.	.	.	.	.	.	.	.	.	.	.	.	.	.	.	.	.	.	.	.	.	.	.	.	.	.	.	.	.	.	.	.	.	.	.	.	.
FGL20240223NXQR100WGS1547_S332_Citrobacter_werkmanii	2	.	.	.	.	.	.	.	.	.	.	.	.	.	.	.	.	.	.	.	.	.	.	.	.	94.66	100	.	.	.	.	.	.	.	.	.	.	.	.	.	.	.	.	.	.	.	.	.	.
FGL20240223NXQR100WGS1551_S336_Escherichia_coli	6	.	.	.	.	.	.	.	81.79	.	.	.	.	.	100	100	.	.	.	.	.	.	.	.	.	.	.	.	.	100	.	.	.	.	.	.	.	.	.	.	.	.	97.16	.	.	.	.	.	100
FGL20240223NXQR100WGS1553_S338_Klebsiella_pneumoniae	1	.	.	.	.	.	.	.	.	.	.	.	.	.	.	.	100	.	.	.	.	.	.	.	.	.	.	.	.	.	.	.	.	.	.	.	.	.	.	.	.	.	.	.	.	.	.	.	.
FGL20240223NXQR100WGS1556_S341_Klebsiella_quasipneumoniae	4	.	.	.	.	.	100	.	.	.	.	.	.	.	.	.	100	100	.	.	.	.	.	.	.	.	.	.	.	.	.	.	.	.	.	.	.	100	.	.	.	.	.	.	.	.	.	.	.
FGL20240223NXQR100WGS1557_S342_Klebsiella_pneumoniae	5	.	.	.	.	.	100.00;100.00	.	.	.	.	.	.	99.74	.	.	100	.	.	.	.	.	.	100	.	.	.	.	.	.	.	.	.	.	.	.	.	.	.	.	.	.	.	.	.	.	100	.	.
FGL20240223NXQR100WGS1562_S347_Escherichia_coli	7	.	.	100	.	.	99.12	.	.	.	.	.	.	.	98.97	100	.	.	.	.	.	.	.	.	99.6	.	.	.	.	.	.	.	.	.	.	.	.	.	.	.	.	.	97.16	.	.	.	.	.	.
FGL20240223NXQR100WGS1569_S354_Escherichia_coli	2	.	100	.	.	.	.	.	.	.	.	.	.	.	100	.	.	.	.	.	.	.	.	.	.	.	.	.	.	.	.	.	.	.	.	.	.	.	.	.	.	.	.	.	.	.	.	.	.
FGL20240223NXQR100WGS1572_S357_Escherichia_coli	3	.	.	.	.	.	.	.	.	.	.	.	.	.	100	100	.	.	.	.	.	.	.	.	.	.	.	.	.	.	.	.	.	.	100	.	.	.	.	.	.	.	.	.	.	.	.	.	.
FGL20240223NXQR100WGS1577_S362_Escherichia_coli	6	.	100	.	.	.	.	.	81.79	.	.	.	.	.	100	100	.	.	.	.	.	.	.	.	.	.	.	.	.	100	.	.	.	.	.	.	.	.	.	.	.	.	97.16	.	.	.	.	.	.
FGL20240223NXQR100WGS1603_S370_Enterobacter_hormaechei	2	.	.	.	.	.	.	.	.	.	.	.	.	.	.	.	.	.	.	.	100	.	.	.	.	.	.	.	.	.	.	.	100	.	.	.	.	.	.	.	.	.	.	.	.	.	.	.	.
FGL20240223NXQR100WGS1607_S374_Escherichia_coli	4	.	.	.	.	.	.	.	.	.	.	.	.	.	100	100	.	.	.	.	.	.	.	.	.	.	.	.	.	.	.	.	.	.	100	.	.	.	.	.	.	.	97.16	.	.	.	.	.	.
FGL20240223NXQR100WGS1608_S375_Enterobacter_cloacae	1	.	.	.	.	.	.	.	.	.	.	.	.	.	.	.	.	.	.	.	.	.	.	.	.	.	.	.	.	.	.	.	.	.	.	.	.	.	100	.	.	.	.	.	.	.	.	.	.
FGL20240223NXQR100WGS1611_S378_Escherichia_coli	8	100	100.00;83.97	100	.	.	97.37	.	.	.	.	.	.	.	100	100	.	.	.	.	.	.	.	.	.	.	.	.	.	.	.	.	.	.	100	.	.	.	.	.	.	.	.	.	.	.	.	100	.
FGL20240223NXQR100WGS1613_S380_Enterobacter_roggenkampii	5	.	.	.	.	99.65;99.65	96.49;100.00;96.49;100.00	.	.	.	.	.	.	100	.	.	100	.	82.89	.	.	.	.	.	.	.	.	.	.	.	.	.	.	.	.	.	.	.	.	.	.	.	.	.	.	.	.	.	.
FGL20240223NXQR100WGS1615_S382_Citrobacter_werkmanii	1	.	.	.	.	.	.	.	.	.	.	.	.	100	.	.	.	.	.	.	.	.	.	.	.	.	.	.	.	.	.	.	.	.	.	.	.	.	.	.	.	.	.	.	.	.	.	.	.
#FILE	NUM_FOUND	rep11a_1_repA(pB82)	rep11c_2_repA(pJS33)	rep14a_1_CDS2(pEFNP1)	rep14a_2_ORF1(pKQ10)	rep14a_4_rep(AUS0004p3)	rep17_1_CDS29(pRUM)	rep17_2_repA(AUS0004p1)	rep18a_1_repA(p200B)	rep18b_1_BO23315710(pE1p13)	rep18b_2_repA(pEF418)	rep1_1_repE(pAMbeta)	rep22_1b_repB(pAMalpha1)	rep29_2_EFAU085p4001(Aus0085p4)_Aus0085	rep29_3_ORF8(pCIZ2)	rep2_1_orf1(pRE25)	repUS15_1_repA(DO3)	repUS15_2_repA(pNB2354p1)	repUS43_1_CDS12738(DOp1)	repUS57_1_rep(AUS0004p2)
R87_S80_Enterococcus_faecium	5	.	.	.	.	.	100	.	.	.	.	.	.	.	100.00;100.00	100	.	100	100	.
R87_S81_Enterococcus_faecium	3	.	.	.	.	.	.	100	.	.	.	.	.	.	.	.	100	.	100	.
R87_S84_Enterococcus_faecium	4	100	.	.	.	.	.	.	.	.	.	.	.	.	.	100	.	100	100	.
R87_S86_Enterococcus_faecium	4	99.79	.	.	.	.	.	.	.	.	.	.	.	.	.	100	.	100	100	.
R87_S88_Enterococcus_faecium	5	.	.	.	.	.	.	.	.	99.59	.	95.04	100	.	.	99.87	.	100	.	.
R87_S89_Enterococcus_faecium	5	.	.	100	.	.	.	.	.	.	.	.	.	.	.	100	.	100	100	100
R87_S90_Enterococcus_faecium	5	100	.	.	90.8	.	.	.	.	.	.	.	.	.	.	100	.	100	100	.
R87_S92_Enterococcus_faecium	4	.	.	.	.	.	.	.	100	.	.	.	.	.	.	100	.	100	100	.
R87_S94_Enterococcus_faecium	4	100.00;100.00;100.00;100.00	.	.	.	.	.	.	.	.	.	.	.	.	.	100	.	100	100	.
R87_S96_Enterococcus_faecium	3	.	.	.	.	.	.	.	100	.	.	.	.	.	.	.	100	.	100	.
R91_S87_Enterococcus_faecium	5	.	.	.	.	.	.	.	100	.	.	94.77	.	.	.	100	.	100	100	.
R91_S91_Enterococcus_faecium	2	.	.	.	.	.	.	.	.	.	.	.	.	100	.	.	.	100	.	.
R94_S124_Enterococcus_faecium	3	.	.	100	.	.	.	.	.	.	.	.	.	.	.	.	100	.	100	.
R94_S126_Enterococcus_raffinosus	2	.	.	.	.	.	.	.	.	.	.	.	.	.	.	100	.	.	100	.
R94_S127_Enterococcus_faecium	4	100	.	100	.	.	.	.	.	.	.	.	.	.	.	.	.	100	100	.
FGL20231216NXQR94WGS957_S129_Enterococcus_faecium_all.fna	3	.	.	.	.	.	.	.	.	.	.	.	87.26	.	.	.	100	.	100
R94_S132_Enterococcus_faecium	4	96.51	.	.	.	.	.	.	.	.	.	.	.	.	.	100	.	100	100	.
R94_S134_Enterococcus_faecium	5	100	.	.	.	.	100	.	.	.	.	.	.	.	.	100	.	100	100	.
R94_S135_Enterococcus_faecium	3	.	.	.	.	.	.	.	100	.	.	.	.	.	.	.	.	100	100	.
R94_S204_Enterococcus_faecium	4	.	.	100	.	98.83;98.83	.	.	.	.	.	.	.	100	.	.	.	.	100	.
FGL20240223NXQR100WGS1549_S334_Enterococcus_faecium	5	.	96.62	.	.	.	.	100	100	.	.	.	.	.	.	.	.	100	100	.
FGL20240223NXQR100WGS1573_S358_Enterococcus_faecium	4	100	.	.	.	.	.	.	.	.	.	.	.	.	.	100	.	100	100	.
[truncated: 5 more columns]

## Sheet:  S8c
Table S8c: Integrons linked with ARGs in sewage isolates
# cmd: integron_finder --local-max --func-annot FGL20231216NXQR94WGS1012_S184_Klebsiella_pneumoniae_all.fna --cpu 20 --outdir integron_results/FGL20231216NXQR94WGS1012_S184_Klebsiella_pneumoniae_all
ID_integron	ID_replicon	element	pos_beg	pos_end	strand	evalue	type_elt	annotation	type
integron_01	NODE_1797_length_1408_cov_1.108509	NODE_1797_length_1408_cov_1.108509_2	272	1408	-1	NA	protein	protein	CALIN
integron_01	NODE_1797_length_1408_cov_1.108509	attc_001	523	566	-1	0.9	attC	attC	CALIN
integron_01	NODE_1797_length_1408_cov_1.108509	attc_002	1351	1408	-1	0.0012	attC	attC	CALIN
# cmd: integron_finder --local-max --func-annot FGL20231216NXQR94WGS931_S103_Acinetobacter_baumannii_all.fna --cpu 20 --outdir integron_results/FGL20231216NXQR94WGS931_S103_Acinetobacter_baumannii_all
ID_integron	ID_replicon	element	pos_beg	pos_end	strand	evalue	type_elt	annotation	type
integron_01	NODE_135_length_17499_cov_8.993323	NODE_135_length_17499_cov_8.993323_18	15136	15483	-1	8.5e-65	protein	SMR_qac_E-NCBIFAM	CALIN
integron_01	NODE_135_length_17499_cov_8.993323	attc_001	15586	15645	-1	5.6e-10	attC	attC	CALIN
integron_01	NODE_135_length_17499_cov_8.993323	NODE_135_length_17499_cov_8.993323_19	15647	16426	-1	1.3e-154	protein	ANT_3pp_I-NCBIFAM	CALIN
integron_01	NODE_135_length_17499_cov_8.993323	attc_002	16442	16501	-1	3.9e-07	attC	attC	CALIN
integron_01	NODE_135_length_17499_cov_8.993323	attc_003	16762	16851	-1	1.1e-05	attC	attC	CALIN
integron_01	NODE_135_length_17499_cov_8.993323	NODE_135_length_17499_cov_8.993323_20	16846	17343	-1	3.1e-119	protein	trim_DfrA12-NCBIFAM	CALIN
integron_01	NODE_307_length_7802_cov_2.899805	NODE_307_length_7802_cov_2.899805_6	2588	3634	-1	NA	protein	protein	CALIN
integron_01	NODE_307_length_7802_cov_2.899805	attc_001	2783	2901	-1	0.84	attC	attC	CALIN
integron_01	NODE_307_length_7802_cov_2.899805	NODE_307_length_7802_cov_2.899805_7	3651	4577	-1	NA	protein	protein	CALIN
integron_01	NODE_307_length_7802_cov_2.899805	attc_002	3921	3972	-1	0.0064	attC	attC	CALIN
integron_01	NODE_307_length_7802_cov_2.899805	NODE_307_length_7802_cov_2.899805_8	4822	5475	1	NA	protein	protein	CALIN
integron_01	NODE_307_length_7802_cov_2.899805	NODE_307_length_7802_cov_2.899805_9	5669	7708	1	NA	protein	protein	CALIN
integron_01	NODE_307_length_7802_cov_2.899805	attc_003	6913	6955	-1	0.53	attC	attC	CALIN
# cmd: integron_finder --local-max --func-annot FGL20231216NXQR94WGS943_S115_Escherichia_coli_all.fna --cpu 20 --outdir integron_results/FGL20231216NXQR94WGS943_S115_Escherichia_coli_all
ID_integron	ID_replicon	element	pos_beg	pos_end	strand	evalue	type_elt	annotation	type
integron_01	NODE_250_length_13925_cov_1.917814	attc_001	237	279	1	0.62	attC	attC	CALIN
integron_01	NODE_250_length_13925_cov_1.917814	NODE_250_length_13925_cov_1.917814_1	357	1898	1	NA	protein	protein	CALIN
integron_01	NODE_250_length_13925_cov_1.917814	attc_002	1040	1146	1	0.14	attC	attC	CALIN
integron_01	NODE_654_length_6578_cov_1.843280	NODE_654_length_6578_cov_1.843280_5	1792	2289	-1	NA	protein	protein	CALIN
integron_01	NODE_654_length_6578_cov_1.843280	attc_001	2304	2363	-1	5.1e-09	attC	attC	CALIN
integron_01	NODE_654_length_6578_cov_1.843280	NODE_654_length_6578_cov_1.843280_6	2365	3153	-1	1.3e-181	protein	ANT_3pp_AadA1-NCBIFAM	CALIN
integron_01	NODE_654_length_6578_cov_1.843280	attc_002	3157	3216	-1	2.8e-08	attC	attC	CALIN
integron_01	NODE_654_length_6578_cov_1.843280	NODE_654_length_6578_cov_1.843280_7	3211	3735	-1	4.5e-128	protein	sat2-NCBIFAM	CALIN
integron_01	NODE_654_length_6578_cov_1.843280	attc_003	3741	3835	-1	0.00024	attC	attC	CALIN
integron_01	NODE_654_length_6578_cov_1.843280	NODE_654_length_6578_cov_1.843280_8	3830	4303	-1	4.7e-95	protein	trim_DfrA1_like-NCBIFAM	CALIN
integron_01	NODE_922_length_3623_cov_1.930206	NODE_922_length_3623_cov_1.930206_1	1	3186	-1	NA	protein	protein	CALIN
integron_01	NODE_922_length_3623_cov_1.930206	attc_001	180	264	-1	0.066	attC	attC	CALIN
integron_01	NODE_922_length_3623_cov_1.930206	attc_002	3523	3580	-1	0.86	attC	attC	CALIN
# cmd: integron_finder --local-max --func-annot FGL20231216NXQR94WGS957_S129_Enterococcus_faecium_all.fasta --outdir results/FGL20231216NXQR94WGS957_S129_Enterococcus_faecium_all
# No Integron found
# cmd: integron_finder --local-max --func-annot FGL20231216NXQR94WGS975_S147_Klebsiella_pneumoniae_all.fna --cpu 20 --outdir integron_results/FGL20231216NXQR94WGS975_S147_Klebsiella_pneumoniae_all
ID_integron	ID_replicon	element	pos_beg	pos_end	strand	evalue	type_elt	annotation	type
integron_01	NODE_202_length_4862_cov_10.270539	NODE_202_length_4862_cov_10.270539_1	1	198	-1	NA	protein	protein	CALIN
integron_01	NODE_202_length_4862_cov_10.270539	attc_001	301	370	-1	5e-08	attC	attC	CALIN
integron_01	NODE_202_length_4862_cov_10.270539	NODE_202_length_4862_cov_10.270539_2	390	1649	-1	1.5e-290	protein	efflux_CmlA-NCBIFAM	CALIN
integron_01	NODE_202_length_4862_cov_10.270539	NODE_202_length_4862_cov_10.270539_3	1871	2650	-1	6e-184	protein	ANT_3pp_AadA1-NCBIFAM	CALIN
integron_01	NODE_202_length_4862_cov_10.270539	attc_002	2666	2722	-1	0.0015	attC	attC	CALIN
integron_01	NODE_202_length_4862_cov_10.270539	NODE_202_length_4862_cov_10.270539_4	2748	4004	-1	4.5e-278	protein	EreA-NCBIFAM	CALIN
integron_01	NODE_202_length_4862_cov_10.270539	attc_003	4130	4243	-1	0.00032	attC	attC	CALIN
integron_01	NODE_202_length_4862_cov_10.270539	NODE_202_length_4862_cov_10.270539_5	4250	4861	-1	6.7e-70	protein	rifampin_ARR-NCBIFAM	CALIN
# cmd: integron_finder --local-max --func-annot FGL20231216NXQR94WGS985_S157_Klebsiella_pneumoniae_all.fna --cpu 20 --outdir integron_results/FGL20231216NXQR94WGS985_S157_Klebsiella_pneumoniae_all
ID_integron	ID_replicon	element	pos_beg	pos_end	strand	evalue	type_elt	annotation	type
integron_01	NODE_573_length_7577_cov_2.389664	NODE_573_length_7577_cov_2.389664_1	175	936	-1	NA	protein	protein	CALIN
integron_01	NODE_573_length_7577_cov_2.389664	attc_001	235	334	1	0.78	attC	attC	CALIN
integron_01	NODE_573_length_7577_cov_2.389664	NODE_573_length_7577_cov_2.389664_2	1045	1959	1	NA	protein	protein	CALIN
integron_01	NODE_573_length_7577_cov_2.389664	NODE_573_length_7577_cov_2.389664_3	2260	2448	1	NA	protein	protein	CALIN
integron_01	NODE_573_length_7577_cov_2.389664	NODE_573_length_7577_cov_2.389664_4	2519	2809	-1	NA	protein	protein	CALIN
integron_01	NODE_573_length_7577_cov_2.389664	NODE_573_length_7577_cov_2.389664_5	2995	3864	-1	NA	protein	protein	CALIN
integron_01	NODE_573_length_7577_cov_2.389664	attc_002	3060	3109	1	0.059	attC	attC	CALIN
integron_01	NODE_597_length_7338_cov_2.289696	NODE_597_length_7338_cov_2.289696_2	980	2011	1	NA	protein	protein	CALIN
integron_01	NODE_597_length_7338_cov_2.289696	attc_001	1225	1341	1	0.87	attC	attC	CALIN
integron_01	NODE_597_length_7338_cov_2.289696	NODE_597_length_7338_cov_2.289696_3	2004	2657	1	NA	protein	protein	CALIN
integron_01	NODE_597_length_7338_cov_2.289696	attc_002	2694	2815	1	0.16	attC	attC	CALIN
integron_01	NODE_597_length_7338_cov_2.289696	NODE_597_length_7338_cov_2.289696_4	2701	3516	1	NA	protein	protein	CALIN
integron_01	NODE_1300_length_2439_cov_2.711938	NODE_1300_length_2439_cov_2.711938_1	20	568	-1	NA	protein	protein	CALIN
integron_01	NODE_1300_length_2439_cov_2.711938	attc_001	597	686	-1	4.5e-07	attC	attC	CALIN
integron_01	NODE_1300_length_2439_cov_2.711938	NODE_1300_length_2439_cov_2.711938_2	706	1536	-1	1.9e-199	protein	blaOXA-1_like-NCBIFAM	CALIN
integron_01	NODE_1300_length_2439_cov_2.711938	attc_002	1601	1672	-1	2.4e-07	attC	attC	CALIN
integron_01	NODE_1300_length_2439_cov_2.711938	NODE_1300_length_2439_cov_2.711938_3	1667	2266	-1	7e-133	protein	AAC_6p_Ib-NCBIFAM	CALIN
integron_01	NODE_1543_length_1355_cov_27.085505	NODE_1543_length_1355_cov_27.085505_1	203	1216	-1	9.1e-27	protein	intI	In0
# cmd: integron_finder --local-max --func-annot FGL20240223NXQR100WGS1468_S254_Citrobacter_sp_all.fna --cpu 20 --outdir integron_results/FGL20240223NXQR100WGS1468_S254_Citrobacter_sp_all
# No Integron found
# cmd: integron_finder --local-max --func-annot FGL20240223NXQR100WGS1469_S255_Enterobacter_cloacae_all.fna --cpu 20 --outdir integron_results/FGL20240223NXQR100WGS1469_S255_Enterobacter_cloacae_all
ID_integron	ID_replicon	element	pos_beg	pos_end	strand	evalue	type_elt	annotation	type
integron_01	NODE_62_length_25495_cov_2.900859_[Enterobacter_cloacae_99.239_100_0.0]	NODE_62_length_25495_cov_2.900859_[Enterobacter_cloacae_99.239_100_0.0]_14	15815	17884	1	NA	protein	protein	CALIN
integron_01	NODE_62_length_25495_cov_2.900859_[Enterobacter_cloacae_99.239_100_0.0]	attc_001	16528	16595	-1	0.038	attC	attC	CALIN
integron_01	NODE_62_length_25495_cov_2.900859_[Enterobacter_cloacae_99.239_100_0.0]	NODE_62_length_25495_cov_2.900859_[Enterobacter_cloacae_99.239_100_0.0]_15	18117	19736	1	NA	protein	protein	CALIN
integron_01	NODE_62_length_25495_cov_2.900859_[Enterobacter_cloacae_99.239_100_0.0]	attc_002	18483	18590	-1	0.22	attC	attC	CALIN
# cmd: integron_finder --local-max --func-annot FGL20240223NXQR100WGS1470_S256_Citrobacter_sp_all.fna --cpu 20 --outdir integron_results/FGL20240223NXQR100WGS1470_S256_Citrobacter_sp_all
# No Integron found
# cmd: integron_finder --local-max --func-annot FGL20240223NXQR100WGS1471_S257_Citrobacter_werkmanii_all.fna --cpu 20 --outdir integron_results/FGL20240223NXQR100WGS1471_S257_Citrobacter_werkmanii_all
ID_integron	ID_replicon	element	pos_beg	pos_end	strand	evalue	type_elt	annotation	type
integron_01	NODE_98_length_13038_cov_2.156998_[Citrobacter_sp._ABFQG_99.975_94_0.0]	NODE_98_length_13038_cov_2.156998_[Citrobacter_sp._ABFQG_99.975_94_0.0]_4	1389	2402	-1	1.8e-25	protein	intI	complete
integron_01	NODE_98_length_13038_cov_2.156998_[Citrobacter_sp._ABFQG_99.975_94_0.0]	NODE_98_length_13038_cov_2.156998_[Citrobacter_sp._ABFQG_99.975_94_0.0]_5	2559	3032	1	8.1e-95	protein	trim_DfrA1_like-NCBIFAM	complete
integron_01	NODE_98_length_13038_cov_2.156998_[Citrobacter_sp._ABFQG_99.975_94_0.0]	attc_001	3027	3121	1	0.0001	attC	attC	complete
integron_01	NODE_98_length_13038_cov_2.156998_[Citrobacter_sp._ABFQG_99.975_94_0.0]	NODE_98_length_13038_cov_2.156998_[Citrobacter_sp._ABFQG_99.975_94_0.0]_6	3137	3916	1	4.8e-183	protein	ANT_3pp_AadA1-NCBIFAM	complete
integron_01	NODE_98_length_13038_cov_2.156998_[Citrobacter_sp._ABFQG_99.975_94_0.0]	attc_002	3918	3977	1	3.3e-10	attC	attC	complete
integron_01	NODE_98_length_13038_cov_2.156998_[Citrobacter_sp._ABFQG_99.975_94_0.0]	NODE_98_length_13038_cov_2.156998_[Citrobacter_sp._ABFQG_99.975_94_0.0]_7	4080	4427	1	8.5e-65	protein	SMR_qac_E-NCBIFAM	complete
# cmd: integron_finder --local-max --func-annot FGL20240223NXQR100WGS1472_S258_Klebsiella_pneumoniae_all.fna --cpu 20 --outdir integron_results/FGL20240223NXQR100WGS1472_S258_Klebsiella_pneumoniae_all
ID_integron	ID_replicon	element	pos_beg	pos_end	strand	evalue	type_elt	annotation	type
integron_01	NODE_282_length_4520_cov_9.291828_[Klebsiella_pneumoniae_100.000_87_0.0]	NODE_282_length_4520_cov_9.291828_[Klebsiella_pneumoniae_100.000_87_0.0]_3	380	964	1	NA	protein	protein	CALIN
integron_01	NODE_282_length_4520_cov_9.291828_[Klebsiella_pneumoniae_100.000_87_0.0]	attc_001	1033	1104	1	6.5e-07	attC	attC	CALIN
integron_01	NODE_282_length_4520_cov_9.291828_[Klebsiella_pneumoniae_100.000_87_0.0]	NODE_282_length_4520_cov_9.291828_[Klebsiella_pneumoniae_100.000_87_0.0]_4	1120	1896	1	1.1e-181	protein	ANT_3pp_AadA1-NCBIFAM	CALIN
integron_01	NODE_282_length_4520_cov_9.291828_[Klebsiella_pneumoniae_100.000_87_0.0]	NODE_282_length_4520_cov_9.291828_[Klebsiella_pneumoniae_100.000_87_0.0]_5	1956	2780	1	8.9e-118	protein	bla_class_D_alt-NCBIFAM	CALIN
integron_01	NODE_282_length_4520_cov_9.291828_[Klebsiella_pneumoniae_100.000_87_0.0]	attc_002	2805	2875	1	0.00029	attC	attC	CALIN
integron_01	NODE_282_length_4520_cov_9.291828_[Klebsiella_pneumoniae_100.000_87_0.0]	NODE_282_length_4520_cov_9.291828_[Klebsiella_pneumoniae_100.000_87_0.0]_6	3046	3297	1	NA	protein	protein	CALIN
integron_01	NODE_282_length_4520_cov_9.291828_[Klebsiella_pneumoniae_100.000_87_0.0]	NODE_282_length_4520_cov_9.291828_[Klebsiella_pneumoniae_100.000_87_0.0]_7	3480	4085	1	1.1e-133	protein	AAC_6p_Ib-NCBIFAM	CALIN
integron_01	NODE_282_length_4520_cov_9.291828_[Klebsiella_pneumoniae_100.000_87_0.0]	attc_003	4080	4151	1	4.5e-07	attC	attC	CALIN
integron_01	NODE_282_length_4520_cov_9.291828_[Klebsiella_pneumoniae_100.000_87_0.0]	NODE_282_length_4520_cov_9.291828_[Klebsiella_pneumoniae_100.000_87_0.0]_8	4171	4518	1	NA	protein	protein	CALIN
integron_01	NODE_322_length_3299_cov_3.902270_[Klebsiella_pneumoniae_100.000_100_0.0]	NODE_322_length_3299_cov_3.902270_[Klebsiella_pneumoniae_100.000_100_0.0]_1	2	403	1	NA	protein	protein	complete
integron_01	NODE_322_length_3299_cov_3.902270_[Klebsiella_pneumoniae_100.000_100_0.0]	attc_001	490	575	-1	0.0025	attC	attC	complete
integron_01	NODE_322_length_3299_cov_3.902270_[Klebsiella_pneumoniae_100.000_100_0.0]	NODE_322_length_3299_cov_3.902270_[Klebsiella_pneumoniae_100.000_100_0.0]_2	570	1028	-1	4.4e-91	protein	trim_DfrA1_like-NCBIFAM	complete
integron_01	NODE_322_length_3299_cov_3.902270_[Klebsiella_pneumoniae_100.000_100_0.0]	NODE_322_length_3299_cov_3.902270_[Klebsiella_pneumoniae_100.000_100_0.0]_3	1199	2212	1	3.7e-26	protein	intI	complete
# cmd: integron_finder --local-max --func-annot FGL20240223NXQR100WGS1473_S259_Lysinibacillus_fusiformis_all.fasta --outdir results/FGL20240223NXQR100WGS1473_S259_Lysinibacillus_fusiformis_all
# No Integron found
# cmd: integron_finder --local-max --func-annot FGL20240223NXQR100WGS1474_S260_Lysinibacillus_fusiformis_all.fasta --outdir results/FGL20240223NXQR100WGS1474_S260_Lysinibacillus_fusiformis_all
# No Integron found
# cmd: integron_finder --local-max --func-annot FGL20240223NXQR100WGS1475_S261_Pseudomonas_aeruginosa_all.fna --cpu 20 --outdir integron_results/FGL20240223NXQR100WGS1475_S261_Pseudomonas_aeruginosa_all
ID_integron	ID_replicon	element	pos_beg	pos_end	strand	evalue	type_elt	annotation	type
integron_01	NODE_28_length_84790_cov_4.181035_[Pseudomonas_aeruginosa_99.975_100_0.0]	NODE_28_length_84790_cov_4.181035_[Pseudomonas_aeruginosa_99.975_100_0.0]_2	62	409	-1	3.4e-64	protein	SMR_qac_E-NCBIFAM	complete
integron_01	NODE_28_length_84790_cov_4.181035_[Pseudomonas_aeruginosa_99.975_100_0.0]	attc_001	512	571	-1	0.29	attC	attC	complete
integron_01	NODE_28_length_84790_cov_4.181035_[Pseudomonas_aeruginosa_99.975_100_0.0]	NODE_28_length_84790_cov_4.181035_[Pseudomonas_aeruginosa_99.975_100_0.0]_3	631	1674	1	NA	protein	protein	complete
integron_01	NODE_28_length_84790_cov_4.181035_[Pseudomonas_aeruginosa_99.975_100_0.0]	NODE_28_length_84790_cov_4.181035_[Pseudomonas_aeruginosa_99.975_100_0.0]_4	2475	2678	1	NA	protein	protein	complete
integron_01	NODE_28_length_84790_cov_4.181035_[Pseudomonas_aeruginosa_99.975_100_0.0]	attc_002	2757	2834	-1	0.00032	attC	attC	complete
integron_01	NODE_28_length_84790_cov_4.181035_[Pseudomonas_aeruginosa_99.975_100_0.0]	attc_003	3287	3412	-1	0.21	attC	attC	complete
integron_01	NODE_28_length_84790_cov_4.181035_[Pseudomonas_aeruginosa_99.975_100_0.0]	NODE_28_length_84790_cov_4.181035_[Pseudomonas_aeruginosa_99.975_100_0.0]_5	3432	4088	-1	1e-153	protein	penta_rpt_QnrVC-NCBIFAM	complete
integron_01	NODE_28_length_84790_cov_4.181035_[Pseudomonas_aeruginosa_99.975_100_0.0]	NODE_28_length_84790_cov_4.181035_[Pseudomonas_aeruginosa_99.975_100_0.0]_6	4441	5454	1	7.2e-25	protein	intI	complete
# cmd: integron_finder --local-max --func-annot FGL20240223NXQR100WGS1476_S262_Klebsiella_pneumoniae_all.fna --cpu 20 --outdir integron_results/FGL20240223NXQR100WGS1476_S262_Klebsiella_pneumoniae_all
ID_integron	ID_replicon	element	pos_beg	pos_end	strand	evalue	type_elt	annotation	type
integron_01	NODE_86_length_11233_cov_3.370430_[Klebsiella_pneumoniae_100.000_100_0.0]	NODE_86_length_11233_cov_3.370430_[Klebsiella_pneumoniae_100.000_100_0.0]_6	5772	6785	-1	1.1e-25	protein	intI	complete
integron_01	NODE_86_length_11233_cov_3.370430_[Klebsiella_pneumoniae_100.000_100_0.0]	NODE_86_length_11233_cov_3.370430_[Klebsiella_pneumoniae_100.000_100_0.0]_7	6817	7416	1	3.3e-93	protein	trim_DfrA1_like-NCBIFAM	complete
integron_01	NODE_86_length_11233_cov_3.370430_[Klebsiella_pneumoniae_100.000_100_0.0]	attc_001	7411	7543	1	6e-08	attC	attC	complete
integron_01	NODE_86_length_11233_cov_3.370430_[Klebsiella_pneumoniae_100.000_100_0.0]	NODE_86_length_11233_cov_3.370430_[Klebsiella_pneumoniae_100.000_100_0.0]_8	7646	7993	1	5.1e-65	protein	SMR_qac_E-NCBIFAM	complete
# cmd: integron_finder --local-max --func-annot FGL20240223NXQR100WGS1477_S263_Enterobacter_hormaechei_all.fna --cpu 20 --outdir integron_results/FGL20240223NXQR100WGS1477_S263_Enterobacter_hormaechei_all
# No Integron found
# cmd: integron_finder --local-max --func-annot FGL20240223NXQR100WGS1478_S264_Citrobacter_werkmanii_all.fna --cpu 20 --outdir integron_results/FGL20240223NXQR100WGS1478_S264_Citrobacter_werkmanii_all
# No Integron found
# cmd: integron_finder --local-max --func-annot FGL20240223NXQR100WGS1481_S267_Pseudomonas_aeruginosa_all.fna --cpu 20 --outdir integron_results/FGL20240223NXQR100WGS1481_S267_Pseudomonas_aeruginosa_all
ID_integron	ID_replicon	element	pos_beg	pos_end	strand	evalue	type_elt	annotation	type
integron_01	NODE_26_length_52665_cov_2.931117_[Pseudomonas_aeruginosa_99.998_90_0.0]	NODE_26_length_52665_cov_2.931117_[Pseudomonas_aeruginosa_99.998_90_0.0]_45	43096	44109	-1	4.9e-25	protein	intI	complete
integron_01	NODE_26_length_52665_cov_2.931117_[Pseudomonas_aeruginosa_99.998_90_0.0]	attc_001	44731	44842	1	8.9e-09	attC	attC	complete
integron_01	NODE_26_length_52665_cov_2.931117_[Pseudomonas_aeruginosa_99.998_90_0.0]	NODE_26_length_52665_cov_2.931117_[Pseudomonas_aeruginosa_99.998_90_0.0]_46	45053	45709	1	6.9e-154	protein	penta_rpt_QnrVC-NCBIFAM	complete
integron_01	NODE_26_length_52665_cov_2.931117_[Pseudomonas_aeruginosa_99.998_90_0.0]	attc_002	45729	45854	1	0.13	attC	attC	complete
integron_01	NODE_26_length_52665_cov_2.931117_[Pseudomonas_aeruginosa_99.998_90_0.0]	NODE_26_length_52665_cov_2.931117_[Pseudomonas_aeruginosa_99.998_90_0.0]_47	45914	46276	1	NA	protein	protein	complete
integron_01	NODE_26_length_52665_cov_2.931117_[Pseudomonas_aeruginosa_99.998_90_0.0]	attc_003	46307	46384	1	0.005	attC	attC	complete
integron_01	NODE_26_length_52665_cov_2.931117_[Pseudomonas_aeruginosa_99.998_90_0.0]	NODE_26_length_52665_cov_2.931117_[Pseudomonas_aeruginosa_99.998_90_0.0]_48	46415	46867	1	2.6e-69	protein	rifampin_ARR-NCBIFAM	complete
integron_01	NODE_26_length_52665_cov_2.931117_[Pseudomonas_aeruginosa_99.998_90_0.0]	attc_004	46874	46987	1	0.0026	attC	attC	complete
integron_01	NODE_26_length_52665_cov_2.931117_[Pseudomonas_aeruginosa_99.998_90_0.0]	NODE_26_length_52665_cov_2.931117_[Pseudomonas_aeruginosa_99.998_90_0.0]_49	47052	47288	1	4.6e-55	protein	trim_DfrB-NCBIFAM	complete
integron_01	NODE_26_length_52665_cov_2.931117_[Pseudomonas_aeruginosa_99.998_90_0.0]	attc_005	47342	47398	1	0.00047	attC	attC	complete
integron_01	NODE_26_length_52665_cov_2.931117_[Pseudomonas_aeruginosa_99.998_90_0.0]	NODE_26_length_52665_cov_2.931117_[Pseudomonas_aeruginosa_99.998_90_0.0]_50	47414	47890	1	1.5e-67	protein	AAC_3_I-NCBIFAM	complete
integron_01	NODE_26_length_52665_cov_2.931117_[Pseudomonas_aeruginosa_99.998_90_0.0]	attc_006	47885	47962	1	3.4e-05	attC	attC	complete
integron_01	NODE_26_length_52665_cov_2.931117_[Pseudomonas_aeruginosa_99.998_90_0.0]	NODE_26_length_52665_cov_2.931117_[Pseudomonas_aeruginosa_99.998_90_0.0]_51	48059	48697	-1	NA	protein	protein	complete
integron_01	NODE_85_length_27744_cov_2.625629_[Pseudomonas_aeruginosa_100.000_100_0.0]	NODE_85_length_27744_cov_2.625629_[Pseudomonas_aeruginosa_100.000_100_0.0]_10	12614	12931	1	NA	protein	protein	CALIN
integron_01	NODE_85_length_27744_cov_2.625629_[Pseudomonas_aeruginosa_100.000_100_0.0]	attc_001	12776	12884	-1	0.27	attC	attC	CALIN
integron_01	NODE_85_length_27744_cov_2.625629_[Pseudomonas_aeruginosa_100.000_100_0.0]	NODE_85_length_27744_cov_2.625629_[Pseudomonas_aeruginosa_100.000_100_0.0]_11	13060	14616	1	NA	protein	protein	CALIN
integron_01	NODE_85_length_27744_cov_2.625629_[Pseudomonas_aeruginosa_100.000_100_0.0]	attc_002	13537	13587	-1	0.099	attC	attC	CALIN
# cmd: integron_finder --local-max --func-annot FGL20240223NXQR100WGS1482_S268_Klebsiella_quasipneumoniae_all.fna --cpu 20 --outdir integron_results/FGL20240223NXQR100WGS1482_S268_Klebsiella_quasipneumoniae_all
ID_integron	ID_replicon	element	pos_beg	pos_end	strand	evalue	type_elt	annotation	type
integron_01	NODE_32_length_44105_cov_1.886625_[Klebsiella_quasipneumoniae_99.974_98_0.0]	NODE_32_length_44105_cov_1.886625_[Klebsiella_quasipneumoniae_99.974_98_0.0]_10	8956	10548	1	NA	protein	protein	CALIN
integron_01	NODE_32_length_44105_cov_1.886625_[Klebsiella_quasipneumoniae_99.974_98_0.0]	attc_001	10640	10752	-1	0.035	attC	attC	CALIN
integron_01	NODE_32_length_44105_cov_1.886625_[Klebsiella_quasipneumoniae_99.974_98_0.0]	NODE_32_length_44105_cov_1.886625_[Klebsiella_quasipneumoniae_99.974_98_0.0]_11	10925	13288	-1	NA	protein	protein	CALIN
integron_01	NODE_32_length_44105_cov_1.886625_[Klebsiella_quasipneumoniae_99.974_98_0.0]	attc_002	11571	11633	-1	0.015	attC	attC	CALIN
# cmd: integron_finder --local-max --func-annot FGL20240223NXQR100WGS1483_S269_Proteus_mirabilis_all.fna --cpu 20 --outdir integron_results/FGL20240223NXQR100WGS1483_S269_Proteus_mirabilis_all
ID_integron	ID_replicon	element	pos_beg	pos_end	strand	evalue	type_elt	annotation	type
integron_01	NODE_7_length_97207_cov_7.706489_[Proteus_mirabilis_99.756_90_0.0]	NODE_7_length_97207_cov_7.706489_[Proteus_mirabilis_99.756_90_0.0]_95	94176	95189	-1	8.9e-25	protein	intI	complete
integron_01	NODE_7_length_97207_cov_7.706489_[Proteus_mirabilis_99.756_90_0.0]	NODE_7_length_97207_cov_7.706489_[Proteus_mirabilis_99.756_90_0.0]_96	95334	95831	1	1.5e-118	protein	trim_DfrA12-NCBIFAM	complete
integron_01	NODE_7_length_97207_cov_7.706489_[Proteus_mirabilis_99.756_90_0.0]	attc_001	95826	95915	1	6e-05	attC	attC	complete
integron_01	NODE_7_length_97207_cov_7.706489_[Proteus_mirabilis_99.756_90_0.0]	attc_002	96176	96235	1	2.1e-06	attC	attC	complete
integron_01	NODE_7_length_97207_cov_7.706489_[Proteus_mirabilis_99.756_90_0.0]	NODE_7_length_97207_cov_7.706489_[Proteus_mirabilis_99.756_90_0.0]_97	96251	97030	1	6.2e-154	protein	ANT_3pp_I-NCBIFAM	complete
integron_01	NODE_7_length_97207_cov_7.706489_[Proteus_mirabilis_99.756_90_0.0]	attc_003	97032	97091	1	3.1e-09	attC	attC	complete
# cmd: integron_finder --local-max --func-annot FGL20240223NXQR100WGS1484_S270_Proteus_mirabilis_all.fna --cpu 20 --outdir integron_results/FGL20240223NXQR100WGS1484_S270_Proteus_mirabilis_all
ID_integron	ID_replicon	element	pos_beg	pos_end	strand	evalue	type_elt	annotation	type
integron_01	NODE_14_length_82536_cov_13.094516_[Proteus_mirabilis_98.945_65_0.0]	NODE_14_length_82536_cov_13.094516_[Proteus_mirabilis_98.945_65_0.0]_69	68848	69162	1	NA	protein	protein	CALIN
integron_01	NODE_14_length_82536_cov_13.094516_[Proteus_mirabilis_98.945_65_0.0]	NODE_14_length_82536_cov_13.094516_[Proteus_mirabilis_98.945_65_0.0]_70	69125	70063	1	NA	protein	protein	CALIN
integron_01	NODE_14_length_82536_cov_13.094516_[Proteus_mirabilis_98.945_65_0.0]	attc_001	69157	69255	1	0.00071	attC	attC	CALIN
integron_01	NODE_14_length_82536_cov_13.094516_[Proteus_mirabilis_98.945_65_0.0]	attc_002	70078	70140	1	2.6e-07	attC	attC	CALIN
integron_01	NODE_14_length_82536_cov_13.094516_[Proteus_mirabilis_98.945_65_0.0]	NODE_14_length_82536_cov_13.094516_[Proteus_mirabilis_98.945_65_0.0]_71	70156	70575	1	NA	protein	protein	CALIN
integron_02	NODE_14_length_82536_cov_13.094516_[Proteus_mirabilis_98.945_65_0.0]	NODE_14_length_82536_cov_13.094516_[Proteus_mirabilis_98.945_65_0.0]_82	79393	80406	-1	7.9e-25	protein	intI	In0
# cmd: integron_finder --local-max --func-annot FGL20240223NXQR100WGS1485_S271_Citrobacter_sp_all.fna --cpu 20 --outdir integron_results/FGL20240223NXQR100WGS1485_S271_Citrobacter_sp_all
# No Integron found
# cmd: integron_finder --local-max --func-annot FGL20240223NXQR100WGS1486_S272_Klebsiella_pneumoniae_all.fna --cpu 20 --outdir integron_results/FGL20240223NXQR100WGS1486_S272_Klebsiella_pneumoniae_all
ID_integron	ID_replicon	element	pos_beg	pos_end	strand	evalue	type_elt	annotation	type
integron_01	NODE_78_length_5005_cov_4.324723_[Klebsiella_pneumoniae_100.000_100_0.0]	NODE_78_length_5005_cov_4.324723_[Klebsiella_pneumoniae_100.000_100_0.0]_1	383	1396	-1	5.5e-26	protein	intI	complete
integron_01	NODE_78_length_5005_cov_4.324723_[Klebsiella_pneumoniae_100.000_100_0.0]	NODE_78_length_5005_cov_4.324723_[Klebsiella_pneumoniae_100.000_100_0.0]_2	1541	2038	1	9.3e-120	protein	trim_DfrA12-NCBIFAM	complete
integron_01	NODE_78_length_5005_cov_4.324723_[Klebsiella_pneumoniae_100.000_100_0.0]	attc_001	2033	2122	1	3.1e-06	attC	attC	complete
integron_01	NODE_78_length_5005_cov_4.324723_[Klebsiella_pneumoniae_100.000_100_0.0]	attc_002	2383	2442	1	1.1e-07	attC	attC	complete
integron_01	NODE_78_length_5005_cov_4.324723_[Klebsiella_pneumoniae_100.000_100_0.0]	NODE_78_length_5005_cov_4.324723_[Klebsiella_pneumoniae_100.000_100_0.0]_3	2458	3237	1	3.8e-155	protein	ANT_3pp_I-NCBIFAM	complete
integron_01	NODE_78_length_5005_cov_4.324723_[Klebsiella_pneumoniae_100.000_100_0.0]	attc_003	3239	3298	1	1.6e-10	attC	attC	complete
integron_01	NODE_78_length_5005_cov_4.324723_[Klebsiella_pneumoniae_100.000_100_0.0]	NODE_78_length_5005_cov_4.324723_[Klebsiella_pneumoniae_100.000_100_0.0]_4	3401	3748	1	2.6e-65	protein	SMR_qac_E-NCBIFAM	complete
# cmd: integron_finder --local-max --func-annot FGL20240223NXQR100WGS1488_S274_Morganella_morganii_all.fna --cpu 20 --outdir integron_results/FGL20240223NXQR100WGS1488_S274_Morganella_morganii_all
ID_integron	ID_replicon	element	pos_beg	pos_end	strand	evalue	type_elt	annotation	type
integron_01	NODE_39_length_29083_cov_3.093349_[Morganella_morganii_99.873_100_0.0]	NODE_39_length_29083_cov_3.093349_[Morganella_morganii_99.873_100_0.0]_4	2354	2827	1	1.5e-94	protein	trim_DfrA1_like-NCBIFAM	CALIN
integron_01	NODE_39_length_29083_cov_3.093349_[Morganella_morganii_99.873_100_0.0]	attc_001	2822	2916	1	0.0011	attC	attC	CALIN
integron_01	NODE_39_length_29083_cov_3.093349_[Morganella_morganii_99.873_100_0.0]	NODE_39_length_29083_cov_3.093349_[Morganella_morganii_99.873_100_0.0]_5	2922	3446	1	1.4e-127	protein	sat2-NCBIFAM	CALIN
integron_01	NODE_39_length_29083_cov_3.093349_[Morganella_morganii_99.873_100_0.0]	attc_002	3441	3500	1	1.2e-07	attC	attC	CALIN
integron_01	NODE_39_length_29083_cov_3.093349_[Morganella_morganii_99.873_100_0.0]	NODE_39_length_29083_cov_3.093349_[Morganella_morganii_99.873_100_0.0]_6	3504	4292	1	4e-181	protein	ANT_3pp_AadA1-NCBIFAM	CALIN
integron_01	NODE_39_length_29083_cov_3.093349_[Morganella_morganii_99.873_100_0.0]	attc_003	4294	4353	1	2.3e-08	attC	attC	CALIN
integron_01	NODE_39_length_29083_cov_3.093349_[Morganella_morganii_99.873_100_0.0]	NODE_39_length_29083_cov_3.093349_[Morganella_morganii_99.873_100_0.0]_7	4368	4865	1	NA	protein	protein	CALIN
# cmd: integron_finder --local-max --func-annot FGL20240223NXQR100WGS1489_S275_Escherichia_coli_all.fna --cpu 20 --outdir integron_results/FGL20240223NXQR100WGS1489_S275_Escherichia_coli_all
ID_integron	ID_replicon	element	pos_beg	pos_end	strand	evalue	type_elt	annotation	type
integron_01	NODE_26_length_59481_cov_4.964939_[Escherichia_coli_O15:H18_99.963_99_0.0]	NODE_26_length_59481_cov_4.964939_[Escherichia_coli_O15:H18_99.963_99_0.0]_61	57000	57347	-1	2.7e-64	protein	SMR_qac_E-NCBIFAM	complete
integron_01	NODE_26_length_59481_cov_4.964939_[Escherichia_coli_O15:H18_99.963_99_0.0]	NODE_26_length_59481_cov_4.964939_[Escherichia_coli_O15:H18_99.963_99_0.0]_62	57437	57565	1	NA	protein	protein	complete
integron_01	NODE_26_length_59481_cov_4.964939_[Escherichia_coli_O15:H18_99.963_99_0.0]	attc_001	57450	57536	-1	0.012	attC	attC	complete
integron_01	NODE_26_length_59481_cov_4.964939_[Escherichia_coli_O15:H18_99.963_99_0.0]	NODE_26_length_59481_cov_4.964939_[Escherichia_coli_O15:H18_99.963_99_0.0]_63	57531	58004	-1	2.1e-93	protein	trim_DfrA1_like-NCBIFAM	complete
integron_01	NODE_26_length_59481_cov_4.964939_[Escherichia_coli_O15:H18_99.963_99_0.0]	NODE_26_length_59481_cov_4.964939_[Escherichia_coli_O15:H18_99.963_99_0.0]_64	58160	59173	1	5.8e-25	protein	intI	complete
# cmd: integron_finder --local-max --func-annot FGL20240223NXQR100WGS1490_S276_Klebsiella_pneumoniae_all.fna --cpu 20 --outdir integron_results/FGL20240223NXQR100WGS1490_S276_Klebsiella_pneumoniae_all
ID_integron	ID_replicon	element	pos_beg	pos_end	strand	evalue	type_elt	annotation	type
integron_01	NODE_118_length_3828_cov_3.135099_[Klebsiella_pneumoniae_99.974_100_0.0]	NODE_118_length_3828_cov_3.135099_[Klebsiella_pneumoniae_99.974_100_0.0]_2	1092	1358	-1	NA	protein	protein	complete
integron_01	NODE_118_length_3828_cov_3.135099_[Klebsiella_pneumoniae_99.974_100_0.0]	attc_001	1499	1584	-1	0.0028	attC	attC	complete
integron_01	NODE_118_length_3828_cov_3.135099_[Klebsiella_pneumoniae_99.974_100_0.0]	NODE_118_length_3828_cov_3.135099_[Klebsiella_pneumoniae_99.974_100_0.0]_3	1579	2052	-1	1.7e-94	protein	trim_DfrA1_like-NCBIFAM	complete
integron_01	NODE_118_length_3828_cov_3.135099_[Klebsiella_pneumoniae_99.974_100_0.0]	NODE_118_length_3828_cov_3.135099_[Klebsiella_pneumoniae_99.974_100_0.0]_4	2208	3221	1	4.6e-26	protein	intI	complete
integron_01	NODE_129_length_2438_cov_5.394202_[Klebsiella_pneumoniae_100.000_100_0.0]	NODE_129_length_2438_cov_5.394202_[Klebsiella_pneumoniae_100.000_100_0.0]_1	21	569	-1	NA	protein	protein	CALIN
integron_01	NODE_129_length_2438_cov_5.394202_[Klebsiella_pneumoniae_100.000_100_0.0]	attc_001	598	687	-1	4.5e-07	attC	attC	CALIN
integron_01	NODE_129_length_2438_cov_5.394202_[Klebsiella_pneumoniae_100.000_100_0.0]	NODE_129_length_2438_cov_5.394202_[Klebsiella_pneumoniae_100.000_100_0.0]_2	707	1537	-1	1.4e-199	protein	blaOXA-1_like-NCBIFAM	CALIN
integron_01	NODE_129_length_2438_cov_5.394202_[Klebsiella_pneumoniae_100.000_100_0.0]	attc_002	1602	1673	-1	2.4e-07	attC	attC	CALIN
integron_01	NODE_129_length_2438_cov_5.394202_[Klebsiella_pneumoniae_100.000_100_0.0]	NODE_129_length_2438_cov_5.394202_[Klebsiella_pneumoniae_100.000_100_0.0]_3	1668	2186	-1	1.1e-125	protein	AAC_6p_Ib-NCBIFAM	CALIN
# cmd: integron_finder --local-max --func-annot FGL20240223NXQR100WGS1491_S277_Citrobacter_werkmanii_all.fna --cpu 20 --outdir integron_results/FGL20240223NXQR100WGS1491_S277_Citrobacter_werkmanii_all
# No Integron found
# cmd: integron_finder --local-max --func-annot FGL20240223NXQR100WGS1492_S278_Morganella_morganii_all.fna --cpu 20 --outdir integron_results/FGL20240223NXQR100WGS1492_S278_Morganella_morganii_all
# No Integron found
# cmd: integron_finder --local-max --func-annot FGL20240223NXQR100WGS1493_S279_Enterobacter_hormaechei_all.fna --cpu 20 --outdir integron_results/FGL20240223NXQR100WGS1493_S279_Enterobacter_hormaechei_all
ID_integron	ID_replicon	element	pos_beg	pos_end	strand	evalue	type_elt	annotation	type
integron_01	NODE_52_length_29962_cov_2.855639_[Enterobacter_hormaechei_100.000_100_0.0]	NODE_52_length_29962_cov_2.855639_[Enterobacter_hormaechei_100.000_100_0.0]_10	10588	12084	1	NA	protein	protein	CALIN
integron_01	NODE_52_length_29962_cov_2.855639_[Enterobacter_hormaechei_100.000_100_0.0]	attc_001	11946	12007	-1	0.072	attC	attC	CALIN
integron_01	NODE_52_length_29962_cov_2.855639_[Enterobacter_hormaechei_100.000_100_0.0]	NODE_52_length_29962_cov_2.855639_[Enterobacter_hormaechei_100.000_100_0.0]_11	12078	13529	1	NA	protein	protein	CALIN
integron_01	NODE_52_length_29962_cov_2.855639_[Enterobacter_hormaechei_100.000_100_0.0]	NODE_52_length_29962_cov_2.855639_[Enterobacter_hormaechei_100.000_100_0.0]_12	13530	14522	-1	NA	protein	protein	CALIN
integron_01	NODE_52_length_29962_cov_2.855639_[Enterobacter_hormaechei_100.000_100_0.0]	NODE_52_length_29962_cov_2.855639_[Enterobacter_hormaechei_100.000_100_0.0]_13	14674	15132	1	NA	protein	protein	CALIN
integron_01	NODE_52_length_29962_cov_2.855639_[Enterobacter_hormaechei_100.000_100_0.0]	NODE_52_length_29962_cov_2.855639_[Enterobacter_hormaechei_100.000_100_0.0]_14	15223	15672	1	NA	protein	protein	CALIN
integron_01	NODE_52_length_29962_cov_2.855639_[Enterobacter_hormaechei_100.000_100_0.0]	attc_002	15692	15733	-1	0.37	attC	attC	CALIN
integron_01	NODE_80_length_7455_cov_5.379094_[Enterobacter_hormaechei_100.000_100_0.0]	NODE_80_length_7455_cov_5.379094_[Enterobacter_hormaechei_100.000_100_0.0]_7	5193	5459	-1	NA	protein	protein	complete
integron_01	NODE_80_length_7455_cov_5.379094_[Enterobacter_hormaechei_100.000_100_0.0]	attc_001	5600	5685	-1	0.0055	attC	attC	complete
integron_01	NODE_80_length_7455_cov_5.379094_[Enterobacter_hormaechei_100.000_100_0.0]	NODE_80_length_7455_cov_5.379094_[Enterobacter_hormaechei_100.000_100_0.0]_8	5680	6162	-1	1.5e-93	protein	trim_DfrA1_like-NCBIFAM	complete
integron_01	NODE_80_length_7455_cov_5.379094_[Enterobacter_hormaechei_100.000_100_0.0]	NODE_80_length_7455_cov_5.379094_[Enterobacter_hormaechei_100.000_100_0.0]_9	6309	7322	1	9.1e-26	protein	intI	complete
# cmd: integron_finder --local-max --func-annot FGL20240223NXQR100WGS1494_S280_Klebsiella_pneumoniae_all.fna --cpu 20 --outdir integron_results/FGL20240223NXQR100WGS1494_S280_Klebsiella_pneumoniae_all
ID_integron	ID_replicon	element	pos_beg	pos_end	strand	evalue	type_elt	annotation	type
integron_01	NODE_64_length_11233_cov_8.732397_[Klebsiella_pneumoniae_100.000_100_0.0]	NODE_64_length_11233_cov_8.732397_[Klebsiella_pneumoniae_100.000_100_0.0]_5	3241	3588	-1	5.1e-65	protein	SMR_qac_E-NCBIFAM	complete
integron_01	NODE_64_length_11233_cov_8.732397_[Klebsiella_pneumoniae_100.000_100_0.0]	attc_001	3691	3823	-1	6e-08	attC	attC	complete
integron_01	NODE_64_length_11233_cov_8.732397_[Klebsiella_pneumoniae_100.000_100_0.0]	NODE_64_length_11233_cov_8.732397_[Klebsiella_pneumoniae_100.000_100_0.0]_6	3818	4417	-1	3.3e-93	protein	trim_DfrA1_like-NCBIFAM	complete
integron_01	NODE_64_length_11233_cov_8.732397_[Klebsiella_pneumoniae_100.000_100_0.0]	NODE_64_length_11233_cov_8.732397_[Klebsiella_pneumoniae_100.000_100_0.0]_7	4449	5462	1	1.1e-25	protein	intI	complete
# cmd: integron_finder --local-max --func-annot FGL20240223NXQR100WGS1495_S281_Citrobacter_werkmanii_all.fna --cpu 20 --outdir integron_results/FGL20240223NXQR100WGS1495_S281_Citrobacter_werkmanii_all
# No Integron found
# cmd: integron_finder --local-max --func-annot FGL20240223NXQR100WGS1496_S282_Klebsiella_pneumoniae_all.fna --cpu 20 --outdir integron_results/FGL20240223NXQR100WGS1496_S282_Klebsiella_pneumoniae_all
ID_integron	ID_replicon	element	pos_beg	pos_end	strand	evalue	type_elt	annotation	type
integron_01	NODE_40_length_21067_cov_4.141144_[Klebsiella_pneumoniae_subsp._pneumoniae_99.810_92_0.0]	attc_001	101	160	-1	0.17	attC	attC	complete
integron_01	NODE_40_length_21067_cov_4.141144_[Klebsiella_pneumoniae_subsp._pneumoniae_99.810_92_0.0]	NODE_40_length_21067_cov_4.141144_[Klebsiella_pneumoniae_subsp._pneumoniae_99.810_92_0.0]_1	129	608	-1	NA	protein	protein	complete
integron_01	NODE_40_length_21067_cov_4.141144_[Klebsiella_pneumoniae_subsp._pneumoniae_99.810_92_0.0]	attc_002	613	707	-1	0.019	attC	attC	complete
integron_01	NODE_40_length_21067_cov_4.141144_[Klebsiella_pneumoniae_subsp._pneumoniae_99.810_92_0.0]	NODE_40_length_21067_cov_4.141144_[Klebsiella_pneumoniae_subsp._pneumoniae_99.810_92_0.0]_2	702	1175	-1	1e-94	protein	trim_DfrA1_like-NCBIFAM	complete
integron_01	NODE_40_length_21067_cov_4.141144_[Klebsiella_pneumoniae_subsp._pneumoniae_99.810_92_0.0]	NODE_40_length_21067_cov_4.141144_[Klebsiella_pneumoniae_subsp._pneumoniae_99.810_92_0.0]_3	1332	2345	1	1.8e-25	protein	intI	complete
# cmd: integron_finder --local-max --func-annot FGL20240223NXQR100WGS1497_S283_Citrobacter_sp_all.fna --cpu 20 --outdir integron_results/FGL20240223NXQR100WGS1497_S283_Citrobacter_sp_all
# No Integron found
# cmd: integron_finder --local-max --func-annot FGL20240223NXQR100WGS1498_S284_Proteus_mirabilis_all.fna --cpu 20 --outdir integron_results/FGL20240223NXQR100WGS1498_S284_Proteus_mirabilis_all
# No Integron found
# cmd: integron_finder --local-max --func-annot FGL20240223NXQR100WGS1499_S285_Morganella_morganii_all.fna --cpu 20 --outdir integron_results/FGL20240223NXQR100WGS1499_S285_Morganella_morganii_all
ID_integron	ID_replicon	element	pos_beg	pos_end	strand	evalue	type_elt	annotation	type
integron_01	NODE_289_length_3979_cov_1.647196_[Morganella_morganii_100.000_100_0.0]	NODE_289_length_3979_cov_1.647196_[Morganella_morganii_100.000_100_0.0]_4	2318	2791	1	3.1e-95	protein	trim_DfrA1_like-NCBIFAM	CALIN
integron_01	NODE_289_length_3979_cov_1.647196_[Morganella_morganii_100.000_100_0.0]	attc_001	2786	2880	1	0.00015	attC	attC	CALIN
integron_01	NODE_289_length_3979_cov_1.647196_[Morganella_morganii_100.000_100_0.0]	NODE_289_length_3979_cov_1.647196_[Morganella_morganii_100.000_100_0.0]_5	2886	3410	1	3e-128	protein	sat2-NCBIFAM	CALIN
integron_01	NODE_289_length_3979_cov_1.647196_[Morganella_morganii_100.000_100_0.0]	attc_002	3405	3464	1	1.7e-08	attC	attC	CALIN
integron_01	NODE_289_length_3979_cov_1.647196_[Morganella_morganii_100.000_100_0.0]	NODE_289_length_3979_cov_1.647196_[Morganella_morganii_100.000_100_0.0]_6	3468	3977	1	NA	protein	protein	CALIN
# cmd: integron_finder --local-max --func-annot FGL20240223NXQR100WGS1501_S287_Providencia_rettgeri_all.fna --cpu 20 --outdir integron_results/FGL20240223NXQR100WGS1501_S287_Providencia_rettgeri_all
ID_integron	ID_replicon	element	pos_beg	pos_end	strand	evalue	type_elt	annotation	type
integron_01	NODE_65_length_24529_cov_2.854848_[Providencia_rettgeri_99.842_68_0.0]	NODE_65_length_24529_cov_2.854848_[Providencia_rettgeri_99.842_68_0.0]_17	10815	11966	-1	NA	protein	protein	CALIN
integron_01	NODE_65_length_24529_cov_2.854848_[Providencia_rettgeri_99.842_68_0.0]	attc_001	11837	11880	-1	0.085	attC	attC	CALIN
integron_01	NODE_65_length_24529_cov_2.854848_[Providencia_rettgeri_99.842_68_0.0]	NODE_65_length_24529_cov_2.854848_[Providencia_rettgeri_99.842_68_0.0]_18	12006	13040	-1	NA	protein	protein	CALIN
integron_01	NODE_65_length_24529_cov_2.854848_[Providencia_rettgeri_99.842_68_0.0]	NODE_65_length_24529_cov_2.854848_[Providencia_rettgeri_99.842_68_0.0]_19	13115	13936	-1	NA	protein	protein	CALIN
integron_01	NODE_65_length_24529_cov_2.854848_[Providencia_rettgeri_99.842_68_0.0]	NODE_65_length_24529_cov_2.854848_[Providencia_rettgeri_99.842_68_0.0]_20	13947	15197	-1	NA	protein	protein	CALIN
integron_01	NODE_65_length_24529_cov_2.854848_[Providencia_rettgeri_99.842_68_0.0]	NODE_65_length_24529_cov_2.854848_[Providencia_rettgeri_99.842_68_0.0]_21	15242	16690	-1	NA	protein	protein	CALIN
integron_01	NODE_65_length_24529_cov_2.854848_[Providencia_rettgeri_99.842_68_0.0]	attc_002	15579	15625	-1	0.041	attC	attC	CALIN
# cmd: integron_finder --local-max --func-annot FGL20240223NXQR100WGS1502_S288_Citrobacter_werkmanii_all.fna --cpu 20 --outdir integron_results/FGL20240223NXQR100WGS1502_S288_Citrobacter_werkmanii_all
# No Integron found
# cmd: integron_finder --local-max --func-annot FGL20240223NXQR100WGS1503_S289_Klebsiella_pneumoniae_all.fna --cpu 20 --outdir integron_results/FGL20240223NXQR100WGS1503_S289_Klebsiella_pneumoniae_all
ID_integron	ID_replicon	element	pos_beg	pos_end	strand	evalue	type_elt	annotation	type
integron_01	NODE_111_length_15069_cov_10.220720_[Klebsiella_pneumoniae_99.832_75_0.0]	NODE_111_length_15069_cov_10.220720_[Klebsiella_pneumoniae_99.832_75_0.0]_7	6275	7288	-1	1.5e-25	protein	intI	complete
integron_01	NODE_111_length_15069_cov_10.220720_[Klebsiella_pneumoniae_99.832_75_0.0]	NODE_111_length_15069_cov_10.220720_[Klebsiella_pneumoniae_99.832_75_0.0]_8	7459	7917	1	1.8e-90	protein	trim_DfrA1_like-NCBIFAM	complete
integron_01	NODE_111_length_15069_cov_10.220720_[Klebsiella_pneumoniae_99.832_75_0.0]	attc_001	7912	7997	1	0.011	attC	attC	complete
integron_01	NODE_111_length_15069_cov_10.220720_[Klebsiella_pneumoniae_99.832_75_0.0]	NODE_111_length_15069_cov_10.220720_[Klebsiella_pneumoniae_99.832_75_0.0]_9	8138	8404	1	NA	protein	protein	complete
integron_01	NODE_191_length_4427_cov_9.206047_[Klebsiella_pneumoniae_99.929_97_0.0]	NODE_191_length_4427_cov_9.206047_[Klebsiella_pneumoniae_99.929_97_0.0]_1	252	851	1	7.8e-134	protein	AAC_6p_Ib-NCBIFAM	CALIN
integron_01	NODE_191_length_4427_cov_9.206047_[Klebsiella_pneumoniae_99.929_97_0.0]	attc_001	846	917	1	6.4e-07	attC	attC	CALIN
integron_01	NODE_191_length_4427_cov_9.206047_[Klebsiella_pneumoniae_99.929_97_0.0]	NODE_191_length_4427_cov_9.206047_[Klebsiella_pneumoniae_99.929_97_0.0]_2	933	1709	1	7.9e-182	protein	ANT_3pp_AadA1-NCBIFAM	CALIN
integron_01	NODE_191_length_4427_cov_9.206047_[Klebsiella_pneumoniae_99.929_97_0.0]	NODE_191_length_4427_cov_9.206047_[Klebsiella_pneumoniae_99.929_97_0.0]_3	1769	2593	1	6.7e-118	protein	bla_class_D_alt-NCBIFAM	CALIN
integron_01	NODE_191_length_4427_cov_9.206047_[Klebsiella_pneumoniae_99.929_97_0.0]	attc_002	2618	2688	1	0.00028	attC	attC	CALIN
integron_01	NODE_191_length_4427_cov_9.206047_[Klebsiella_pneumoniae_99.929_97_0.0]	NODE_191_length_4427_cov_9.206047_[Klebsiella_pneumoniae_99.929_97_0.0]_4	2859	3110	1	NA	protein	protein	CALIN
# cmd: integron_finder --local-max --func-annot FGL20240223NXQR100WGS1504_S290_Aeromonas_veronii_all.fna --cpu 20 --outdir integron_results/FGL20240223NXQR100WGS1504_S290_Aeromonas_veronii_all
ID_integron	ID_replicon	element	pos_beg	pos_end	strand	evalue	type_elt	annotation	type
integron_01	NODE_63_length_27869_cov_4.882200_[Aeromonas_veronii_97.312_88_0.0]	attc_001	22413	22538	-1	9.7e-05	attC	attC	CALIN
integron_01	NODE_63_length_27869_cov_4.882200_[Aeromonas_veronii_97.312_88_0.0]	NODE_63_length_27869_cov_4.882200_[Aeromonas_veronii_97.312_88_0.0]_20	22533	23678	-1	NA	protein	protein	CALIN
integron_01	NODE_63_length_27869_cov_4.882200_[Aeromonas_veronii_97.312_88_0.0]	attc_002	23697	23825	-1	0.0034	attC	attC	CALIN
integron_01	NODE_63_length_27869_cov_4.882200_[Aeromonas_veronii_97.312_88_0.0]	NODE_63_length_27869_cov_4.882200_[Aeromonas_veronii_97.312_88_0.0]_21	23820	24353	-1	NA	protein	protein	CALIN
# cmd: integron_finder --local-max --func-annot FGL20240223NXQR100WGS1505_S291_Enterobacter_roggenkampii_all.fna --cpu 20 --outdir integron_results/FGL20240223NXQR100WGS1505_S291_Enterobacter_roggenkampii_all
ID_integron	ID_replicon	element	pos_beg	pos_end	strand	evalue	type_elt	annotation	type
integron_01	NODE_97_length_5244_cov_5.781708_[Enterobacter_hormaechei_99.980_100_0.0]	NODE_97_length_5244_cov_5.781708_[Enterobacter_hormaechei_99.980_100_0.0]_2	252	851	1	1.4e-132	protein	AAC_6p_Ib-NCBIFAM	CALIN
integron_01	NODE_97_length_5244_cov_5.781708_[Enterobacter_hormaechei_99.980_100_0.0]	attc_001	846	917	1	5.3e-07	attC	attC	CALIN
integron_01	NODE_97_length_5244_cov_5.781708_[Enterobacter_hormaechei_99.980_100_0.0]	NODE_97_length_5244_cov_5.781708_[Enterobacter_hormaechei_99.980_100_0.0]_3	937	1812	1	4.7e-199	protein	blaOXA-1_like-NCBIFAM	CALIN
integron_01	NODE_97_length_5244_cov_5.781708_[Enterobacter_hormaechei_99.980_100_0.0]	attc_002	1832	1921	1	9.6e-07	attC	attC	CALIN
integron_01	NODE_97_length_5244_cov_5.781708_[Enterobacter_hormaechei_99.980_100_0.0]	NODE_97_length_5244_cov_5.781708_[Enterobacter_hormaechei_99.980_100_0.0]_4	1950	2582	1	1.4e-137	protein	chloram_CatB-NCBIFAM	CALIN
integron_01	NODE_97_length_5244_cov_5.781708_[Enterobacter_hormaechei_99.980_100_0.0]	attc_003	2577	2636	1	1.2e-09	attC	attC	CALIN
integron_01	NODE_97_length_5244_cov_5.781708_[Enterobacter_hormaechei_99.980_100_0.0]	NODE_97_length_5244_cov_5.781708_[Enterobacter_hormaechei_99.980_100_0.0]_5	2667	3119	1	7.2e-70	protein	rifampin_ARR-NCBIFAM	CALIN
integron_01	NODE_97_length_5244_cov_5.781708_[Enterobacter_hormaechei_99.980_100_0.0]	attc_004	3126	3241	1	0.00011	attC	attC	CALIN
integron_01	NODE_97_length_5244_cov_5.781708_[Enterobacter_hormaechei_99.980_100_0.0]	NODE_97_length_5244_cov_5.781708_[Enterobacter_hormaechei_99.980_100_0.0]_6	3342	3689	1	3.4e-65	protein	SMR_qac_E-NCBIFAM	CALIN
# cmd: integron_finder --local-max --func-annot FGL20240223NXQR100WGS1506_S292_Escherichia_coli_all.fna --cpu 20 --outdir integron_results/FGL20240223NXQR100WGS1506_S292_Escherichia_coli_all
ID_integron	ID_replicon	element	pos_beg	pos_end	strand	evalue	type_elt	annotation	type
integron_01	NODE_70_length_7193_cov_10.499292_[Escherichia_coli_100.000_63_0.0]	NODE_70_length_7193_cov_10.499292_[Escherichia_coli_100.000_63_0.0]_11	6107	6973	-1	7.8e-26	protein	intI	In0
# cmd: integron_finder --local-max --func-annot FGL20240223NXQR100WGS1507_S293_Proteus_mirabilis_all.fna --cpu 20 --outdir integron_results/FGL20240223NXQR100WGS1507_S293_Proteus_mirabilis_all
# No Integron found
# cmd: integron_finder --local-max --func-annot FGL20240223NXQR100WGS1508_S294_Escherichia_coli_all.fna --cpu 20 --outdir integron_results/FGL20240223NXQR100WGS1508_S294_Escherichia_coli_all
ID_integron	ID_replicon	element	pos_beg	pos_end	strand	evalue	type_elt	annotation	type
integron_01	NODE_89_length_6103_cov_6.253681_[Escherichia_coli_99.984_100_0.0]	NODE_89_length_6103_cov_6.253681_[Escherichia_coli_99.984_100_0.0]_7	5645	6103	-1	1.5e-26	protein	intI	In0
# cmd: integron_finder --local-max --func-annot FGL20240223NXQR100WGS1509_S295_Morganella_morganii_all.fna --cpu 20 --outdir integron_results/FGL20240223NXQR100WGS1509_S295_Morganella_morganii_all
ID_integron	ID_replicon	element	pos_beg	pos_end	strand	evalue	type_elt	annotation	type
integron_01	NODE_27_length_49322_cov_3.630694_[Morganella_morganii_99.205_92_0.0]	NODE_27_length_49322_cov_3.630694_[Morganella_morganii_99.205_92_0.0]_2	110	808	-1	2.8e-10	protein	intI	complete
integron_01	NODE_27_length_49322_cov_3.630694_[Morganella_morganii_99.205_92_0.0]	NODE_27_length_49322_cov_3.630694_[Morganella_morganii_99.205_92_0.0]_3	840	1439	1	4.4e-92	protein	trim_DfrA1_like-NCBIFAM	complete
integron_01	NODE_27_length_49322_cov_3.630694_[Morganella_morganii_99.205_92_0.0]	attc_001	1434	1566	1	8.8e-07	attC	attC	complete
integron_01	NODE_27_length_49322_cov_3.630694_[Morganella_morganii_99.205_92_0.0]	NODE_27_length_49322_cov_3.630694_[Morganella_morganii_99.205_92_0.0]_4	1669	1800	1	NA	protein	protein	complete
integron_01	NODE_51_length_27864_cov_3.901143_[Morganella_morganii_99.925_100_0.0]	NODE_51_length_27864_cov_3.901143_[Morganella_morganii_99.925_100_0.0]_6	5299	5772	1	1.4e-94	protein	trim_DfrA1_like-NCBIFAM	CALIN
integron_01	NODE_51_length_27864_cov_3.901143_[Morganella_morganii_99.925_100_0.0]	attc_001	5767	5861	1	0.001	attC	attC	CALIN
integron_01	NODE_51_length_27864_cov_3.901143_[Morganella_morganii_99.925_100_0.0]	NODE_51_length_27864_cov_3.901143_[Morganella_morganii_99.925_100_0.0]_7	5867	6391	1	1.3e-127	protein	sat2-NCBIFAM	CALIN
integron_01	NODE_51_length_27864_cov_3.901143_[Morganella_morganii_99.925_100_0.0]	attc_002	6386	6445	1	1.2e-07	attC	attC	CALIN
integron_01	NODE_51_length_27864_cov_3.901143_[Morganella_morganii_99.925_100_0.0]	NODE_51_length_27864_cov_3.901143_[Morganella_morganii_99.925_100_0.0]_8	6449	7237	1	3.8e-181	protein	ANT_3pp_AadA1-NCBIFAM	CALIN
integron_01	NODE_51_length_27864_cov_3.901143_[Morganella_morganii_99.925_100_0.0]	attc_003	7239	7298	1	2.2e-08	attC	attC	CALIN
integron_01	NODE_51_length_27864_cov_3.901143_[Morganella_morganii_99.925_100_0.0]	NODE_51_length_27864_cov_3.901143_[Morganella_morganii_99.925_100_0.0]_9	7313	7810	1	NA	protein	protein	CALIN
# cmd: integron_finder --local-max --func-annot FGL20240223NXQR100WGS1510_S296_Escherichia_coli_all.fna --cpu 20 --outdir integron_results/FGL20240223NXQR100WGS1510_S296_Escherichia_coli_all
ID_integron	ID_replicon	element	pos_beg	pos_end	strand	evalue	type_elt	annotation	type
integron_01	NODE_74_length_6103_cov_7.510710_[Escherichia_coli_99.984_100_0.0]	NODE_74_length_6103_cov_7.510710_[Escherichia_coli_99.984_100_0.0]_1	1	459	1	1.5e-26	protein	intI	In0
# cmd: integron_finder --local-max --func-annot FGL20240223NXQR100WGS1511_S297_Acinetobacter_baumannii_all.fna --cpu 20 --outdir integron_results/FGL20240223NXQR100WGS1511_S297_Acinetobacter_baumannii_all
ID_integron	ID_replicon	element	pos_beg	pos_end	strand	evalue	type_elt	annotation	type
integron_01	NODE_89_length_1780_cov_12.706594_[Acinetobacter_baumannii_100.000_100_0.0]	attc_001	-3	66	-1	1.6e-06	attC	attC	CALIN
integron_01	NODE_89_length_1780_cov_12.706594_[Acinetobacter_baumannii_100.000_100_0.0]	NODE_89_length_1780_cov_12.706594_[Acinetobacter_baumannii_100.000_100_0.0]_1	7	597	-1	NA	protein	protein	CALIN
integron_01	NODE_89_length_1780_cov_12.706594_[Acinetobacter_baumannii_100.000_100_0.0]	attc_002	535	604	-1	5.1e-10	attC	attC	CALIN
integron_01	NODE_89_length_1780_cov_12.706594_[Acinetobacter_baumannii_100.000_100_0.0]	NODE_89_length_1780_cov_12.706594_[Acinetobacter_baumannii_100.000_100_0.0]_2	545	1204	-1	NA	protein	protein	CALIN
integron_01	NODE_89_length_1780_cov_12.706594_[Acinetobacter_baumannii_100.000_100_0.0]	attc_003	1073	1181	-1	4.8e-09	attC	attC	CALIN
integron_01	NODE_89_length_1780_cov_12.706594_[Acinetobacter_baumannii_100.000_100_0.0]	NODE_89_length_1780_cov_12.706594_[Acinetobacter_baumannii_100.000_100_0.0]_3	1176	1709	-1	1e-69	protein	AAC_3_I-NCBIFAM	CALIN
# cmd: integron_finder --local-max --func-annot FGL20240223NXQR100WGS1512_S298_Klebsiella_pneumoniae_all.fna --cpu 20 --outdir integron_results/FGL20240223NXQR100WGS1512_S298_Klebsiella_pneumoniae_all
ID_integron	ID_replicon	element	pos_beg	pos_end	strand	evalue	type_elt	annotation	type
integron_01	NODE_85_length_2437_cov_8.769697_[Klebsiella_pneumoniae_100.000_100_0.0]	NODE_85_length_2437_cov_8.769697_[Klebsiella_pneumoniae_100.000_100_0.0]_1	18	566	-1	NA	protein	protein	CALIN
integron_01	NODE_85_length_2437_cov_8.769697_[Klebsiella_pneumoniae_100.000_100_0.0]	attc_001	595	684	-1	4.5e-07	attC	attC	CALIN
integron_01	NODE_85_length_2437_cov_8.769697_[Klebsiella_pneumoniae_100.000_100_0.0]	NODE_85_length_2437_cov_8.769697_[Klebsiella_pneumoniae_100.000_100_0.0]_2	704	1534	-1	1.4e-199	protein	blaOXA-1_like-NCBIFAM	CALIN
integron_01	NODE_85_length_2437_cov_8.769697_[Klebsiella_pneumoniae_100.000_100_0.0]	attc_002	1599	1670	-1	2.4e-07	attC	attC	CALIN
integron_01	NODE_85_length_2437_cov_8.769697_[Klebsiella_pneumoniae_100.000_100_0.0]	NODE_85_length_2437_cov_8.769697_[Klebsiella_pneumoniae_100.000_100_0.0]_3	1665	2183	-1	1.1e-125	protein	AAC_6p_Ib-NCBIFAM	CALIN
# cmd: integron_finder --local-max --func-annot FGL20240223NXQR100WGS1513_S299_Escherichia_coli_all.fna --cpu 20 --outdir integron_results/FGL20240223NXQR100WGS1513_S299_Escherichia_coli_all
ID_integron	ID_replicon	element	pos_beg	pos_end	strand	evalue	type_elt	annotation	type
integron_01	NODE_145_length_5801_cov_7.829397_[Escherichia_coli_100.000_100_0.0]	NODE_145_length_5801_cov_7.829397_[Escherichia_coli_100.000_100_0.0]_6	3318	3665	-1	3.4e-65	protein	SMR_qac_E-NCBIFAM	complete
integron_01	NODE_145_length_5801_cov_7.829397_[Escherichia_coli_100.000_100_0.0]	attc_001	3768	3854	-1	0.0012	attC	attC	complete
integron_01	NODE_145_length_5801_cov_7.829397_[Escherichia_coli_100.000_100_0.0]	NODE_145_length_5801_cov_7.829397_[Escherichia_coli_100.000_100_0.0]_7	3849	4307	-1	8.5e-91	protein	trim_DfrA1_like-NCBIFAM	complete
integron_01	NODE_145_length_5801_cov_7.829397_[Escherichia_coli_100.000_100_0.0]	NODE_145_length_5801_cov_7.829397_[Escherichia_coli_100.000_100_0.0]_8	4478	5491	1	7.3e-26	protein	intI	complete
# cmd: integron_finder --local-max --func-annot FGL20240223NXQR100WGS1516_S302_Citrobacter_werkmanii_all.fna --cpu 20 --outdir integron_results/FGL20240223NXQR100WGS1516_S302_Citrobacter_werkmanii_all
# No Integron found
# cmd: integron_finder --local-max --func-annot FGL20240223NXQR100WGS1517_S303_Klebsiella_pneumoniae_all.fna --cpu 20 --outdir integron_results/FGL20240223NXQR100WGS1517_S303_Klebsiella_pneumoniae_all
ID_integron	ID_replicon	element	pos_beg	pos_end	strand	evalue	type_elt	annotation	type
integron_01	NODE_83_length_2438_cov_7.224145_[Klebsiella_pneumoniae_100.000_100_0.0]	NODE_83_length_2438_cov_7.224145_[Klebsiella_pneumoniae_100.000_100_0.0]_1	21	569	-1	NA	protein	protein	CALIN
integron_01	NODE_83_length_2438_cov_7.224145_[Klebsiella_pneumoniae_100.000_100_0.0]	attc_001	598	687	-1	4.5e-07	attC	attC	CALIN
integron_01	NODE_83_length_2438_cov_7.224145_[Klebsiella_pneumoniae_100.000_100_0.0]	NODE_83_length_2438_cov_7.224145_[Klebsiella_pneumoniae_100.000_100_0.0]_2	707	1537	-1	1.4e-199	protein	blaOXA-1_like-NCBIFAM	CALIN
integron_01	NODE_83_length_2438_cov_7.224145_[Klebsiella_pneumoniae_100.000_100_0.0]	attc_002	1602	1673	-1	2.4e-07	attC	attC	CALIN
integron_01	NODE_83_length_2438_cov_7.224145_[Klebsiella_pneumoniae_100.000_100_0.0]	NODE_83_length_2438_cov_7.224145_[Klebsiella_pneumoniae_100.000_100_0.0]_3	1668	2186	-1	1.1e-125	protein	AAC_6p_Ib-NCBIFAM	CALIN
# cmd: integron_finder --local-max --func-annot FGL20240223NXQR100WGS1518_S304_Citrobacter_portucalensis_all.fna --cpu 20 --outdir integron_results/FGL20240223NXQR100WGS1518_S304_Citrobacter_portucalensis_all
ID_integron	ID_replicon	element	pos_beg	pos_end	strand	evalue	type_elt	annotation	type
integron_01	NODE_88_length_4006_cov_3.630317_[Citrobacter_freundii_97.838_97_0.0]	NODE_88_length_4006_cov_3.630317_[Citrobacter_freundii_97.838_97_0.0]_1	1	69	1	NA	protein	protein	CALIN
integron_01	NODE_88_length_4006_cov_3.630317_[Citrobacter_freundii_97.838_97_0.0]	attc_001	95	217	1	0.37	attC	attC	CALIN
integron_01	NODE_88_length_4006_cov_3.630317_[Citrobacter_freundii_97.838_97_0.0]	NODE_88_length_4006_cov_3.630317_[Citrobacter_freundii_97.838_97_0.0]_2	114	1091	1	NA	protein	protein	CALIN
integron_01	NODE_88_length_4006_cov_3.630317_[Citrobacter_freundii_97.838_97_0.0]	attc_002	164	291	1	0.075	attC	attC	CALIN
# cmd: integron_finder --local-max --func-annot FGL20240223NXQR100WGS1519_S305_Klebsiella_pneumoniae_all.fna --cpu 20 --outdir integron_results/FGL20240223NXQR100WGS1519_S305_Klebsiella_pneumoniae_all
ID_integron	ID_replicon	element	pos_beg	pos_end	strand	evalue	type_elt	annotation	type
integron_01	NODE_74_length_2440_cov_4.351924_[Klebsiella_pneumoniae_100.000_100_0.0]	NODE_74_length_2440_cov_4.351924_[Klebsiella_pneumoniae_100.000_100_0.0]_1	21	569	-1	NA	protein	protein	CALIN
integron_01	NODE_74_length_2440_cov_4.351924_[Klebsiella_pneumoniae_100.000_100_0.0]	attc_001	598	687	-1	4.5e-07	attC	attC	CALIN
integron_01	NODE_74_length_2440_cov_4.351924_[Klebsiella_pneumoniae_100.000_100_0.0]	NODE_74_length_2440_cov_4.351924_[Klebsiella_pneumoniae_100.000_100_0.0]_2	707	1537	-1	1.4e-199	protein	blaOXA-1_like-NCBIFAM	CALIN
integron_01	NODE_74_length_2440_cov_4.351924_[Klebsiella_pneumoniae_100.000_100_0.0]	attc_002	1602	1673	-1	2.4e-07	attC	attC	CALIN
integron_01	NODE_74_length_2440_cov_4.351924_[Klebsiella_pneumoniae_100.000_100_0.0]	NODE_74_length_2440_cov_4.351924_[Klebsiella_pneumoniae_100.000_100_0.0]_3	1668	2186	-1	1.1e-125	protein	AAC_6p_Ib-NCBIFAM	CALIN
# cmd: integron_finder --local-max --func-annot FGL20240223NXQR100WGS1520_S306_Escherichia_coli_all.fna --cpu 20 --outdir integron_results/FGL20240223NXQR100WGS1520_S306_Escherichia_coli_all
ID_integron	ID_replicon	element	pos_beg	pos_end	strand	evalue	type_elt	annotation	type
integron_01	NODE_139_length_7191_cov_8.634909_[Escherichia_coli_100.000_100_0.0]	NODE_139_length_7191_cov_8.634909_[Escherichia_coli_100.000_100_0.0]_7	4708	5055	-1	4.3e-65	protein	SMR_qac_E-NCBIFAM	complete
integron_01	NODE_139_length_7191_cov_8.634909_[Escherichia_coli_100.000_100_0.0]	NODE_139_length_7191_cov_8.634909_[Escherichia_coli_100.000_100_0.0]_8	5145	5273	1	NA	protein	protein	complete
integron_01	NODE_139_length_7191_cov_8.634909_[Escherichia_coli_100.000_100_0.0]	attc_001	5158	5244	-1	0.0015	attC	attC	complete
integron_01	NODE_139_length_7191_cov_8.634909_[Escherichia_coli_100.000_100_0.0]	NODE_139_length_7191_cov_8.634909_[Escherichia_coli_100.000_100_0.0]_9	5239	5712	-1	3.2e-94	protein	trim_DfrA1_like-NCBIFAM	complete
integron_01	NODE_139_length_7191_cov_8.634909_[Escherichia_coli_100.000_100_0.0]	NODE_139_length_7191_cov_8.634909_[Escherichia_coli_100.000_100_0.0]_10	5868	6881	1	9.1e-26	protein	intI	complete
integron_01	NODE_172_length_2581_cov_13.912388_[Escherichia_coli_100.000_100_0.0]	NODE_172_length_2581_cov_13.912388_[Escherichia_coli_100.000_100_0.0]_1	194	1735	1	NA	protein	protein	CALIN
integron_01	NODE_172_length_2581_cov_13.912388_[Escherichia_coli_100.000_100_0.0]	attc_001	877	983	1	0.026	attC	attC	CALIN
integron_01	NODE_172_length_2581_cov_13.912388_[Escherichia_coli_100.000_100_0.0]	attc_002	1648	1690	1	0.29	attC	attC	CALIN
integron_01	NODE_172_length_2581_cov_13.912388_[Escherichia_coli_100.000_100_0.0]	NODE_172_length_2581_cov_13.912388_[Escherichia_coli_100.000_100_0.0]_2	1750	2496	1	NA	protein	protein	CALIN
# cmd: integron_finder --local-max --func-annot FGL20240223NXQR100WGS1521_S307_Morganella_morganii_all.fna --cpu 20 --outdir integron_results/FGL20240223NXQR100WGS1521_S307_Morganella_morganii_all
ID_integron	ID_replicon	element	pos_beg	pos_end	strand	evalue	type_elt	annotation	type
integron_01	NODE_11_length_117799_cov_5.359227_[Morganella_morganii_98.752_96_0.0]	NODE_11_length_117799_cov_5.359227_[Morganella_morganii_98.752_96_0.0]_102	116000	116131	-1	NA	protein	protein	complete
integron_01	NODE_11_length_117799_cov_5.359227_[Morganella_morganii_98.752_96_0.0]	attc_001	116234	116366	-1	6.3e-07	attC	attC	complete
integron_01	NODE_11_length_117799_cov_5.359227_[Morganella_morganii_98.752_96_0.0]	NODE_11_length_117799_cov_5.359227_[Morganella_morganii_98.752_96_0.0]_103	116361	116909	-1	2.1e-92	protein	trim_DfrA1_like-NCBIFAM	complete
integron_01	NODE_11_length_117799_cov_5.359227_[Morganella_morganii_98.752_96_0.0]	NODE_11_length_117799_cov_5.359227_[Morganella_morganii_98.752_96_0.0]_104	116992	117690	1	6.3e-10	protein	intI	complete
integron_01	NODE_13_length_113048_cov_5.442026_[Morganella_morganii_99.235_96_0.0]	NODE_13_length_113048_cov_5.442026_[Morganella_morganii_99.235_96_0.0]_24	24218	24715	-1	NA	protein	protein	CALIN
integron_01	NODE_13_length_113048_cov_5.442026_[Morganella_morganii_99.235_96_0.0]	attc_001	24730	24789	-1	8.8e-08	attC	attC	CALIN
integron_01	NODE_13_length_113048_cov_5.442026_[Morganella_morganii_99.235_96_0.0]	NODE_13_length_113048_cov_5.442026_[Morganella_morganii_99.235_96_0.0]_25	24791	25579	-1	1.5e-180	protein	ANT_3pp_AadA1-NCBIFAM	CALIN
integron_01	NODE_13_length_113048_cov_5.442026_[Morganella_morganii_99.235_96_0.0]	attc_002	25583	25642	-1	4.8e-07	attC	attC	CALIN
integron_01	NODE_13_length_113048_cov_5.442026_[Morganella_morganii_99.235_96_0.0]	NODE_13_length_113048_cov_5.442026_[Morganella_morganii_99.235_96_0.0]_26	25637	26161	-1	5.4e-127	protein	sat2-NCBIFAM	CALIN
integron_01	NODE_13_length_113048_cov_5.442026_[Morganella_morganii_99.235_96_0.0]	attc_003	26167	26261	-1	0.0042	attC	attC	CALIN
integron_01	NODE_13_length_113048_cov_5.442026_[Morganella_morganii_99.235_96_0.0]	NODE_13_length_113048_cov_5.442026_[Morganella_morganii_99.235_96_0.0]_27	26256	26729	-1	5.6e-94	protein	trim_DfrA1_like-NCBIFAM	CALIN
# cmd: integron_finder --local-max --func-annot FGL20240223NXQR100WGS1522_S308_Proteus_penneri_all.fna --cpu 20 --outdir integron_results/FGL20240223NXQR100WGS1522_S308_Proteus_penneri_all
# No Integron found
# cmd: integron_finder --local-max --func-annot FGL20240223NXQR100WGS1523_S309_Klebsiella_pneumoniae_all.fna --cpu 20 --outdir integron_results/FGL20240223NXQR100WGS1523_S309_Klebsiella_pneumoniae_all
ID_integron	ID_replicon	element	pos_beg	pos_end	strand	evalue	type_elt	annotation	type
integron_01	NODE_72_length_2437_cov_17.938961_[Klebsiella_pneumoniae_100.000_100_0.0]	NODE_72_length_2437_cov_17.938961_[Klebsiella_pneumoniae_100.000_100_0.0]_1	18	566	-1	NA	protein	protein	CALIN
integron_01	NODE_72_length_2437_cov_17.938961_[Klebsiella_pneumoniae_100.000_100_0.0]	attc_001	595	684	-1	4.5e-07	attC	attC	CALIN
integron_01	NODE_72_length_2437_cov_17.938961_[Klebsiella_pneumoniae_100.000_100_0.0]	NODE_72_length_2437_cov_17.938961_[Klebsiella_pneumoniae_100.000_100_0.0]_2	704	1534	-1	1.4e-199	protein	blaOXA-1_like-NCBIFAM	CALIN
integron_01	NODE_72_length_2437_cov_17.938961_[Klebsiella_pneumoniae_100.000_100_0.0]	attc_002	1599	1670	-1	2.4e-07	attC	attC	CALIN
integron_01	NODE_72_length_2437_cov_17.938961_[Klebsiella_pneumoniae_100.000_100_0.0]	NODE_72_length_2437_cov_17.938961_[Klebsiella_pneumoniae_100.000_100_0.0]_3	1665	2183	-1	1.1e-125	protein	AAC_6p_Ib-NCBIFAM	CALIN
# cmd: integron_finder --local-max --func-annot FGL20240223NXQR100WGS1524_S310_Escherichia_coli_all.fna --cpu 20 --outdir integron_results/FGL20240223NXQR100WGS1524_S310_Escherichia_coli_all
ID_integron	ID_replicon	element	pos_beg	pos_end	strand	evalue	type_elt	annotation	type
integron_01	NODE_130_length_13705_cov_1.936589_[Escherichia_coli_100.000_99_0.0]	NODE_130_length_13705_cov_1.936589_[Escherichia_coli_100.000_99_0.0]_8	7161	7634	1	8.9e-95	protein	trim_DfrA1_like-NCBIFAM	CALIN
integron_01	NODE_130_length_13705_cov_1.936589_[Escherichia_coli_100.000_99_0.0]	attc_001	7629	7723	1	0.00051	attC	attC	CALIN
integron_01	NODE_130_length_13705_cov_1.936589_[Escherichia_coli_100.000_99_0.0]	NODE_130_length_13705_cov_1.936589_[Escherichia_coli_100.000_99_0.0]_9	7729	8253	1	8.4e-128	protein	sat2-NCBIFAM	CALIN
integron_01	NODE_130_length_13705_cov_1.936589_[Escherichia_coli_100.000_99_0.0]	attc_002	8248	8307	1	5.8e-08	attC	attC	CALIN
integron_01	NODE_130_length_13705_cov_1.936589_[Escherichia_coli_100.000_99_0.0]	NODE_130_length_13705_cov_1.936589_[Escherichia_coli_100.000_99_0.0]_10	8311	9099	1	2.4e-181	protein	ANT_3pp_AadA1-NCBIFAM	CALIN
integron_01	NODE_130_length_13705_cov_1.936589_[Escherichia_coli_100.000_99_0.0]	attc_003	9101	9160	1	1.1e-08	attC	attC	CALIN
integron_01	NODE_130_length_13705_cov_1.936589_[Escherichia_coli_100.000_99_0.0]	NODE_130_length_13705_cov_1.936589_[Escherichia_coli_100.000_99_0.0]_11	9175	9672	1	NA	protein	protein	CALIN
# cmd: integron_finder --local-max --func-annot FGL20240223NXQR100WGS1527_S313_Escherichia_coli_all.fna --cpu 20 --outdir integron_results/FGL20240223NXQR100WGS1527_S313_Escherichia_coli_all
ID_integron	ID_replicon	element	pos_beg	pos_end	strand	evalue	type_elt	annotation	type
integron_01	NODE_89_length_2581_cov_24.704564_[Escherichia_coli_100.000_100_0.0]	NODE_89_length_2581_cov_24.704564_[Escherichia_coli_100.000_100_0.0]_1	86	832	-1	NA	protein	protein	CALIN
integron_01	NODE_89_length_2581_cov_24.704564_[Escherichia_coli_100.000_100_0.0]	NODE_89_length_2581_cov_24.704564_[Escherichia_coli_100.000_100_0.0]_2	847	2388	-1	NA	protein	protein	CALIN
integron_01	NODE_89_length_2581_cov_24.704564_[Escherichia_coli_100.000_100_0.0]	attc_001	892	934	-1	0.29	attC	attC	CALIN
integron_01	NODE_89_length_2581_cov_24.704564_[Escherichia_coli_100.000_100_0.0]	attc_002	1599	1705	-1	0.026	attC	attC	CALIN
# cmd: integron_finder --local-max --func-annot FGL20240223NXQR100WGS1530_S316_Citrobacter_freundii_all.fna --cpu 20 --outdir integron_results/FGL20240223NXQR100WGS1530_S316_Citrobacter_freundii_all
ID_integron	ID_replicon	element	pos_beg	pos_end	strand	evalue	type_elt	annotation	type
integron_01	NODE_359_length_5041_cov_1.121083_[Citrobacter_freundii_100.000_100_0.0]	NODE_359_length_5041_cov_1.121083_[Citrobacter_freundii_100.000_100_0.0]_3	1246	1950	-1	NA	protein	protein	CALIN
integron_01	NODE_359_length_5041_cov_1.121083_[Citrobacter_freundii_100.000_100_0.0]	NODE_359_length_5041_cov_1.121083_[Citrobacter_freundii_100.000_100_0.0]_4	1995	3716	-1	NA	protein	protein	CALIN
integron_01	NODE_359_length_5041_cov_1.121083_[Citrobacter_freundii_100.000_100_0.0]	attc_001	2034	2082	1	0.69	attC	attC	CALIN
integron_01	NODE_359_length_5041_cov_1.121083_[Citrobacter_freundii_100.000_100_0.0]	attc_002	2310	2351	1	0.03	attC	attC	CALIN
# cmd: integron_finder --local-max --func-annot FGL20240223NXQR100WGS1536_S321_Morganella_morganii_all.fna --cpu 20 --outdir integron_results/FGL20240223NXQR100WGS1536_S321_Morganella_morganii_all
# No Integron found
# cmd: integron_finder --local-max --func-annot FGL20240223NXQR100WGS1539_S324_Escherichia_coli_all.fna --cpu 20 --outdir integron_results/FGL20240223NXQR100WGS1539_S324_Escherichia_coli_all
ID_integron	ID_replicon	element	pos_beg	pos_end	strand	evalue	type_elt	annotation	type
integron_01	NODE_764_length_1407_cov_1.063281_[Escherichia_coli_100.000_100_0.0]	NODE_764_length_1407_cov_1.063281_[Escherichia_coli_100.000_100_0.0]_2	599	1297	1	1.8e-11	protein	intI	In0
# cmd: integron_finder --local-max --func-annot FGL20240223NXQR100WGS1540_S325_Pseudomonas_putida_all.fna --cpu 20 --outdir integron_results/FGL20240223NXQR100WGS1540_S325_Pseudomonas_putida_all
# No Integron found
# cmd: integron_finder --local-max --func-annot FGL20240223NXQR100WGS1541_S326_Comamonas_aquatica_all.fna --cpu 20 --outdir integron_results/FGL20240223NXQR100WGS1541_S326_Comamonas_aquatica_all
ID_integron	ID_replicon	element	pos_beg	pos_end	strand	evalue	type_elt	annotation	type
integron_01	NODE_163_length_1478_cov_5.989637_[Comamonas_aquatica_100.000_100_0.0]	attc_001	94	165	-1	9.7e-08	attC	attC	CALIN
integron_01	NODE_163_length_1478_cov_5.989637_[Comamonas_aquatica_100.000_100_0.0]	NODE_163_length_1478_cov_5.989637_[Comamonas_aquatica_100.000_100_0.0]_1	160	678	-1	3e-127	protein	AAC_6p_Ib-NCBIFAM	CALIN
integron_01	NODE_163_length_1478_cov_5.989637_[Comamonas_aquatica_100.000_100_0.0]	attc_002	733	865	-1	1.7e-08	attC	attC	CALIN
integron_01	NODE_163_length_1478_cov_5.989637_[Comamonas_aquatica_100.000_100_0.0]	NODE_163_length_1478_cov_5.989637_[Comamonas_aquatica_100.000_100_0.0]_2	860	1477	-1	2.1e-93	protein	trim_DfrA1_like-NCBIFAM	CALIN
integron_01	NODE_111_length_8442_cov_5.526518_[Comamonas_testosteroni_99.949_80_0.0]	NODE_111_length_8442_cov_5.526518_[Comamonas_testosteroni_99.949_80_0.0]_2	994	1467	1	1.3e-94	protein	trim_DfrA1_like-NCBIFAM	CALIN
integron_01	NODE_111_length_8442_cov_5.526518_[Comamonas_testosteroni_99.949_80_0.0]	attc_001	1462	1568	1	0.00052	attC	attC	CALIN
integron_01	NODE_111_length_8442_cov_5.526518_[Comamonas_testosteroni_99.949_80_0.0]	NODE_111_length_8442_cov_5.526518_[Comamonas_testosteroni_99.949_80_0.0]_3	1584	2498	1	2.1e-199	protein	PSE-NCBIFAM	CALIN
integron_01	NODE_111_length_8442_cov_5.526518_[Comamonas_testosteroni_99.949_80_0.0]	NODE_111_length_8442_cov_5.526518_[Comamonas_testosteroni_99.949_80_0.0]_4	2440	2610	1	NA	protein	protein	CALIN
integron_01	NODE_111_length_8442_cov_5.526518_[Comamonas_testosteroni_99.949_80_0.0]	attc_002	2502	2612	1	3.2e-07	attC	attC	CALIN
integron_01	NODE_111_length_8442_cov_5.526518_[Comamonas_testosteroni_99.949_80_0.0]	NODE_111_length_8442_cov_5.526518_[Comamonas_testosteroni_99.949_80_0.0]_5	2598	3407	1	9.6e-155	protein	ANT_3pp_I-NCBIFAM	CALIN
integron_01	NODE_111_length_8442_cov_5.526518_[Comamonas_testosteroni_99.949_80_0.0]	attc_003	3409	3468	1	8e-09	attC	attC	CALIN
integron_01	NODE_111_length_8442_cov_5.526518_[Comamonas_testosteroni_99.949_80_0.0]	NODE_111_length_8442_cov_5.526518_[Comamonas_testosteroni_99.949_80_0.0]_6	3669	4928	1	4.5e-289	protein	efflux_CmlA-NCBIFAM	CALIN
integron_01	NODE_111_length_8442_cov_5.526518_[Comamonas_testosteroni_99.949_80_0.0]	attc_004	4948	5017	1	8.7e-08	attC	attC	CALIN
integron_01	NODE_111_length_8442_cov_5.526518_[Comamonas_testosteroni_99.949_80_0.0]	NODE_111_length_8442_cov_5.526518_[Comamonas_testosteroni_99.949_80_0.0]_7	5120	5467	1	5.6e-65	protein	SMR_qac_E-NCBIFAM	CALIN
# cmd: integron_finder --local-max --func-annot FGL20240223NXQR100WGS1542_S327_Enterobacter_roggenkampii_all.fna --cpu 20 --outdir integron_results/FGL20240223NXQR100WGS1542_S327_Enterobacter_roggenkampii_all
# No Integron found
# cmd: integron_finder --local-max --func-annot FGL20240223NXQR100WGS1543_S328_Aeromonas_simiae_all.fna --cpu 20 --outdir integron_results/FGL20240223NXQR100WGS1543_S328_Aeromonas_simiae_all
ID_integron	ID_replicon	element	pos_beg	pos_end	strand	evalue	type_elt	annotation	type
integron_01	NODE_157_length_5691_cov_2.230949_[Aeromonas_hydrophila_92.836_20_0.0]	attc_001	1276	1402	-1	0.00037	attC	attC	CALIN
integron_01	NODE_157_length_5691_cov_2.230949_[Aeromonas_hydrophila_92.836_20_0.0]	NODE_157_length_5691_cov_2.230949_[Aeromonas_hydrophila_92.836_20_0.0]_2	1407	2126	-1	NA	protein	protein	CALIN
integron_01	NODE_157_length_5691_cov_2.230949_[Aeromonas_hydrophila_92.836_20_0.0]	NODE_157_length_5691_cov_2.230949_[Aeromonas_hydrophila_92.836_20_0.0]_3	2200	2673	-1	NA	protein	protein	CALIN
integron_01	NODE_157_length_5691_cov_2.230949_[Aeromonas_hydrophila_92.836_20_0.0]	NODE_157_length_5691_cov_2.230949_[Aeromonas_hydrophila_92.836_20_0.0]_4	2670	2906	-1	NA	protein	protein	CALIN
integron_01	NODE_157_length_5691_cov_2.230949_[Aeromonas_hydrophila_92.836_20_0.0]	NODE_157_length_5691_cov_2.230949_[Aeromonas_hydrophila_92.836_20_0.0]_5	3009	3284	-1	NA	protein	protein	CALIN
integron_01	NODE_157_length_5691_cov_2.230949_[Aeromonas_hydrophila_92.836_20_0.0]	attc_002	3292	3416	-1	0.003	attC	attC	CALIN
integron_01	NODE_157_length_5691_cov_2.230949_[Aeromonas_hydrophila_92.836_20_0.0]	NODE_157_length_5691_cov_2.230949_[Aeromonas_hydrophila_92.836_20_0.0]_6	3411	3731	-1	NA	protein	protein	CALIN
integron_01	NODE_157_length_5691_cov_2.230949_[Aeromonas_hydrophila_92.836_20_0.0]	NODE_157_length_5691_cov_2.230949_[Aeromonas_hydrophila_92.836_20_0.0]_7	3738	3839	-1	NA	protein	protein	CALIN
integron_01	NODE_157_length_5691_cov_2.230949_[Aeromonas_hydrophila_92.836_20_0.0]	attc_003	3947	4002	-1	0.00093	attC	attC	CALIN
integron_01	NODE_157_length_5691_cov_2.230949_[Aeromonas_hydrophila_92.836_20_0.0]	NODE_157_length_5691_cov_2.230949_[Aeromonas_hydrophila_92.836_20_0.0]_8	3973	4320	-1	NA	protein	protein	CALIN
integron_01	NODE_4_length_73532_cov_2.879164_[Aeromonas_simiae_98.863_85_0.0]	NODE_4_length_73532_cov_2.879164_[Aeromonas_simiae_98.863_85_0.0]_68	71906	72919	-1	6.3e-25	protein	intI	In0
integron_01	NODE_204_length_3151_cov_2.362434_[Aeromonas_simiae_94.440_40_0.0]	NODE_204_length_3151_cov_2.362434_[Aeromonas_simiae_94.440_40_0.0]_3	1147	1446	1	NA	protein	protein	CALIN
integron_01	NODE_204_length_3151_cov_2.362434_[Aeromonas_simiae_94.440_40_0.0]	attc_001	1451	1558	1	1.5e-06	attC	attC	CALIN
integron_01	NODE_204_length_3151_cov_2.362434_[Aeromonas_simiae_94.440_40_0.0]	NODE_204_length_3151_cov_2.362434_[Aeromonas_simiae_94.440_40_0.0]_4	1578	1793	1	NA	protein	protein	CALIN
integron_01	NODE_204_length_3151_cov_2.362434_[Aeromonas_simiae_94.440_40_0.0]	NODE_204_length_3151_cov_2.362434_[Aeromonas_simiae_94.440_40_0.0]_5	1798	2133	1	NA	protein	protein	CALIN
integron_01	NODE_204_length_3151_cov_2.362434_[Aeromonas_simiae_94.440_40_0.0]	attc_002	2088	2143	1	0.032	attC	attC	CALIN
integron_01	NODE_204_length_3151_cov_2.362434_[Aeromonas_simiae_94.440_40_0.0]	NODE_204_length_3151_cov_2.362434_[Aeromonas_simiae_94.440_40_0.0]_6	2162	2584	1	NA	protein	protein	CALIN
integron_01	NODE_204_length_3151_cov_2.362434_[Aeromonas_simiae_94.440_40_0.0]	attc_003	2591	2658	1	3.5e-05	attC	attC	CALIN
integron_01	NODE_204_length_3151_cov_2.362434_[Aeromonas_simiae_94.440_40_0.0]	NODE_204_length_3151_cov_2.362434_[Aeromonas_simiae_94.440_40_0.0]_7	2781	3149	-1	NA	protein	protein	CALIN
integron_01	NODE_197_length_3573_cov_2.645676_[Aeromonas_sp._ASNIH4_100.000_96_0.0]	NODE_197_length_3573_cov_2.645676_[Aeromonas_sp._ASNIH4_100.000_96_0.0]_2	583	1554	-1	2e-26	protein	intI	complete
integron_01	NODE_197_length_3573_cov_2.645676_[Aeromonas_sp._ASNIH4_100.000_96_0.0]	NODE_197_length_3573_cov_2.645676_[Aeromonas_sp._ASNIH4_100.000_96_0.0]_3	1788	2576	1	NA	protein	protein	complete
integron_01	NODE_197_length_3573_cov_2.645676_[Aeromonas_sp._ASNIH4_100.000_96_0.0]	attc_001	2571	2639	1	0.00015	attC	attC	complete
integron_01	NODE_197_length_3573_cov_2.645676_[Aeromonas_sp._ASNIH4_100.000_96_0.0]	NODE_197_length_3573_cov_2.645676_[Aeromonas_sp._ASNIH4_100.000_96_0.0]_4	2653	3405	1	NA	protein	protein	complete
# cmd: integron_finder --local-max --func-annot FGL20240223NXQR100WGS1544_S329_Klebsiella_michiganensis_all.fna --cpu 20 --outdir integron_results/FGL20240223NXQR100WGS1544_S329_Klebsiella_michiganensis_all
# No Integron found
# cmd: integron_finder --local-max --func-annot FGL20240223NXQR100WGS1545_S330_Acinetobacter_baumannii_all.fna --cpu 20 --outdir integron_results/FGL20240223NXQR100WGS1545_S330_Acinetobacter_baumannii_all
ID_integron	ID_replicon	element	pos_beg	pos_end	strand	evalue	type_elt	annotation	type
integron_01	NODE_87_length_12722_cov_7.911790_[Acinetobacter_baumannii_100.000_100_0.0]	NODE_87_length_12722_cov_7.911790_[Acinetobacter_baumannii_100.000_100_0.0]_6	4932	6971	-1	NA	protein	protein	CALIN
integron_01	NODE_87_length_12722_cov_7.911790_[Acinetobacter_baumannii_100.000_100_0.0]	attc_001	5685	5727	1	0.86	attC	attC	CALIN
integron_01	NODE_87_length_12722_cov_7.911790_[Acinetobacter_baumannii_100.000_100_0.0]	NODE_87_length_12722_cov_7.911790_[Acinetobacter_baumannii_100.000_100_0.0]_7	7165	7887	-1	NA	protein	protein	CALIN
integron_01	NODE_87_length_12722_cov_7.911790_[Acinetobacter_baumannii_100.000_100_0.0]	NODE_87_length_12722_cov_7.911790_[Acinetobacter_baumannii_100.000_100_0.0]_8	8063	8989	1	NA	protein	protein	CALIN
integron_01	NODE_87_length_12722_cov_7.911790_[Acinetobacter_baumannii_100.000_100_0.0]	attc_002	8668	8719	1	0.01	attC	attC	CALIN
# cmd: integron_finder --local-max --func-annot FGL20240223NXQR100WGS1546_S331_Acinetobacter_baumannii_all.fna --cpu 20 --outdir integron_results/FGL20240223NXQR100WGS1546_S331_Acinetobacter_baumannii_all
# No Integron found
# cmd: integron_finder --local-max --func-annot FGL20240223NXQR100WGS1547_S332_Citrobacter_werkmanii_all.fna --cpu 20 --outdir integron_results/FGL20240223NXQR100WGS1547_S332_Citrobacter_werkmanii_all
ID_integron	ID_replicon	element	pos_beg	pos_end	strand	evalue	type_elt	annotation	type
integron_01	NODE_76_length_21205_cov_3.281526_[Citrobacter_werkmanii_98.696_99_0.0]	NODE_76_length_21205_cov_3.281526_[Citrobacter_werkmanii_98.696_99_0.0]_3	1646	3589	-1	NA	protein	protein	CALIN
integron_01	NODE_76_length_21205_cov_3.281526_[Citrobacter_werkmanii_98.696_99_0.0]	attc_001	2062	2114	-1	0.38	attC	attC	CALIN
integron_01	NODE_76_length_21205_cov_3.281526_[Citrobacter_werkmanii_98.696_99_0.0]	NODE_76_length_21205_cov_3.281526_[Citrobacter_werkmanii_98.696_99_0.0]_4	3745	4074	-1	NA	protein	protein	CALIN
integron_01	NODE_76_length_21205_cov_3.281526_[Citrobacter_werkmanii_98.696_99_0.0]	NODE_76_length_21205_cov_3.281526_[Citrobacter_werkmanii_98.696_99_0.0]_5	4474	5340	1	NA	protein	protein	CALIN
integron_01	NODE_76_length_21205_cov_3.281526_[Citrobacter_werkmanii_98.696_99_0.0]	NODE_76_length_21205_cov_3.281526_[Citrobacter_werkmanii_98.696_99_0.0]_6	5355	5942	1	NA	protein	protein	CALIN
integron_01	NODE_76_length_21205_cov_3.281526_[Citrobacter_werkmanii_98.696_99_0.0]	attc_002	5917	5961	-1	0.27	attC	attC	CALIN
integron_01	NODE_76_length_21205_cov_3.281526_[Citrobacter_werkmanii_98.696_99_0.0]	NODE_76_length_21205_cov_3.281526_[Citrobacter_werkmanii_98.696_99_0.0]_7	5958	7520	1	NA	protein	protein	CALIN
# cmd: integron_finder --local-max --func-annot FGL20240223NXQR100WGS1549_S334_Enterococcus_faecium_all.fna --cpu 20 --outdir integron_results/FGL20240223NXQR100WGS1549_S334_Enterococcus_faecium_all
# No Integron found
# cmd: integron_finder --local-max --func-annot FGL20240223NXQR100WGS1551_S336_Escherichia_coli_all.fna --cpu 20 --outdir integron_results/FGL20240223NXQR100WGS1551_S336_Escherichia_coli_all
ID_integron	ID_replicon	element	pos_beg	pos_end	strand	evalue	type_elt	annotation	type
integron_01	NODE_80_length_3621_cov_13.603606_[Escherichia_coli_100.000_100_0.0]	NODE_80_length_3621_cov_13.603606_[Escherichia_coli_100.000_100_0.0]_3	711	1058	-1	3e-65	protein	SMR_qac_E-NCBIFAM	complete
integron_01	NODE_80_length_3621_cov_13.603606_[Escherichia_coli_100.000_100_0.0]	attc_001	1161	1217	-1	5.3e-05	attC	attC	complete
integron_01	NODE_80_length_3621_cov_13.603606_[Escherichia_coli_100.000_100_0.0]	NODE_80_length_3621_cov_13.603606_[Escherichia_coli_100.000_100_0.0]_4	1264	2052	-1	1.2e-138	protein	ANT_3pp_I-NCBIFAM	complete
integron_01	NODE_80_length_3621_cov_13.603606_[Escherichia_coli_100.000_100_0.0]	attc_002	2056	2188	-1	4.1e-08	attC	attC	complete
integron_01	NODE_80_length_3621_cov_13.603606_[Escherichia_coli_100.000_100_0.0]	NODE_80_length_3621_cov_13.603606_[Escherichia_coli_100.000_100_0.0]_5	2183	2782	-1	6.5e-93	protein	trim_DfrA1_like-NCBIFAM	complete
integron_01	NODE_80_length_3621_cov_13.603606_[Escherichia_coli_100.000_100_0.0]	NODE_80_length_3621_cov_13.603606_[Escherichia_coli_100.000_100_0.0]_6	2814	3512	1	4.2e-11	protein	intI	complete
# cmd: integron_finder --local-max --func-annot FGL20240223NXQR100WGS1552_S337_Morganella_morganii_all.fna --cpu 20 --outdir integron_results/FGL20240223NXQR100WGS1552_S337_Morganella_morganii_all
ID_integron	ID_replicon	element	pos_beg	pos_end	strand	evalue	type_elt	annotation	type
integron_01	NODE_5_length_267850_cov_9.280387_[Morganella_morganii_99.240_95_0.0]	NODE_5_length_267850_cov_9.280387_[Morganella_morganii_99.240_95_0.0]_36	37763	38260	-1	NA	protein	protein	CALIN
integron_01	NODE_5_length_267850_cov_9.280387_[Morganella_morganii_99.240_95_0.0]	attc_001	38275	38334	-1	2.1e-07	attC	attC	CALIN
integron_01	NODE_5_length_267850_cov_9.280387_[Morganella_morganii_99.240_95_0.0]	NODE_5_length_267850_cov_9.280387_[Morganella_morganii_99.240_95_0.0]_37	38336	39124	-1	3.5e-180	protein	ANT_3pp_AadA1-NCBIFAM	CALIN
integron_01	NODE_5_length_267850_cov_9.280387_[Morganella_morganii_99.240_95_0.0]	attc_002	39128	39187	-1	1.1e-06	attC	attC	CALIN
integron_01	NODE_5_length_267850_cov_9.280387_[Morganella_morganii_99.240_95_0.0]	NODE_5_length_267850_cov_9.280387_[Morganella_morganii_99.240_95_0.0]_38	39182	39706	-1	1.2e-126	protein	sat2-NCBIFAM	CALIN
integron_01	NODE_5_length_267850_cov_9.280387_[Morganella_morganii_99.240_95_0.0]	attc_003	39712	39806	-1	0.0099	attC	attC	CALIN
integron_01	NODE_5_length_267850_cov_9.280387_[Morganella_morganii_99.240_95_0.0]	NODE_5_length_267850_cov_9.280387_[Morganella_morganii_99.240_95_0.0]_39	39801	40274	-1	1.3e-93	protein	trim_DfrA1_like-NCBIFAM	CALIN
integron_01	NODE_10_length_130249_cov_9.489149_[Morganella_morganii_98.441_97_0.0]	NODE_10_length_130249_cov_9.489149_[Morganella_morganii_98.441_97_0.0]_2	110	808	-1	6.9e-10	protein	intI	complete
integron_01	NODE_10_length_130249_cov_9.489149_[Morganella_morganii_98.441_97_0.0]	NODE_10_length_130249_cov_9.489149_[Morganella_morganii_98.441_97_0.0]_3	891	1439	1	2.3e-92	protein	trim_DfrA1_like-NCBIFAM	complete
integron_01	NODE_10_length_130249_cov_9.489149_[Morganella_morganii_98.441_97_0.0]	attc_001	1434	1566	1	7e-07	attC	attC	complete
integron_01	NODE_10_length_130249_cov_9.489149_[Morganella_morganii_98.441_97_0.0]	NODE_10_length_130249_cov_9.489149_[Morganella_morganii_98.441_97_0.0]_4	1669	1800	1	NA	protein	protein	complete
# cmd: integron_finder --local-max --func-annot FGL20240223NXQR100WGS1554_S339_Morganella_morganii_all.fna --cpu 20 --outdir integron_results/FGL20240223NXQR100WGS1554_S339_Morganella_morganii_all
ID_integron	ID_replicon	element	pos_beg	pos_end	strand	evalue	type_elt	annotation	type
integron_01	NODE_49_length_27976_cov_11.258465_[Morganella_morganii_99.878_100_0.0]	NODE_49_length_27976_cov_11.258465_[Morganella_morganii_99.878_100_0.0]_19	20031	20528	-1	NA	protein	protein	CALIN
integron_01	NODE_49_length_27976_cov_11.258465_[Morganella_morganii_99.878_100_0.0]	attc_001	20543	20602	-1	2.2e-08	attC	attC	CALIN
integron_01	NODE_49_length_27976_cov_11.258465_[Morganella_morganii_99.878_100_0.0]	NODE_49_length_27976_cov_11.258465_[Morganella_morganii_99.878_100_0.0]_20	20604	21392	-1	3.8e-181	protein	ANT_3pp_AadA1-NCBIFAM	CALIN
integron_01	NODE_49_length_27976_cov_11.258465_[Morganella_morganii_99.878_100_0.0]	attc_002	21396	21455	-1	1.2e-07	attC	attC	CALIN
integron_01	NODE_49_length_27976_cov_11.258465_[Morganella_morganii_99.878_100_0.0]	NODE_49_length_27976_cov_11.258465_[Morganella_morganii_99.878_100_0.0]_21	21450	21974	-1	1.3e-127	protein	sat2-NCBIFAM	CALIN
integron_01	NODE_49_length_27976_cov_11.258465_[Morganella_morganii_99.878_100_0.0]	attc_003	21980	22074	-1	0.001	attC	attC	CALIN
integron_01	NODE_49_length_27976_cov_11.258465_[Morganella_morganii_99.878_100_0.0]	NODE_49_length_27976_cov_11.258465_[Morganella_morganii_99.878_100_0.0]_22	22069	22542	-1	1.4e-94	protein	trim_DfrA1_like-NCBIFAM	CALIN
# cmd: integron_finder --local-max --func-annot FGL20240223NXQR100WGS1555_S340_Providencia_rettgeri_all.fna --cpu 20 --outdir integron_results/FGL20240223NXQR100WGS1555_S340_Providencia_rettgeri_all
ID_integron	ID_replicon	element	pos_beg	pos_end	strand	evalue	type_elt	annotation	type
integron_01	NODE_7_length_73747_cov_12.340546_[Providencia_rettgeri_95.451_57_0.0]	NODE_7_length_73747_cov_12.340546_[Providencia_rettgeri_95.451_57_0.0]_67	62970	63317	-1	3.4e-64	protein	SMR_qac_E-NCBIFAM	complete
integron_01	NODE_7_length_73747_cov_12.340546_[Providencia_rettgeri_95.451_57_0.0]	attc_001	63420	63479	-1	1.9e-09	attC	attC	complete
integron_01	NODE_7_length_73747_cov_12.340546_[Providencia_rettgeri_95.451_57_0.0]	NODE_7_length_73747_cov_12.340546_[Providencia_rettgeri_95.451_57_0.0]_68	63481	64296	-1	1.1e-182	protein	ANT_3pp_AadA1-NCBIFAM	complete
integron_01	NODE_7_length_73747_cov_12.340546_[Providencia_rettgeri_95.451_57_0.0]	NODE_7_length_73747_cov_12.340546_[Providencia_rettgeri_95.451_57_0.0]_69	64289	65089	-1	5.4e-191	protein	blaOXA-10_like-NCBIFAM	complete
integron_01	NODE_7_length_73747_cov_12.340546_[Providencia_rettgeri_95.451_57_0.0]	attc_002	65265	65378	-1	2.9e-05	attC	attC	complete
integron_01	NODE_7_length_73747_cov_12.340546_[Providencia_rettgeri_95.451_57_0.0]	NODE_7_length_73747_cov_12.340546_[Providencia_rettgeri_95.451_57_0.0]_70	65385	65837	-1	3.8e-69	protein	rifampin_ARR-NCBIFAM	complete
integron_01	NODE_7_length_73747_cov_12.340546_[Providencia_rettgeri_95.451_57_0.0]	attc_003	65868	65953	-1	0.0042	attC	attC	complete
integron_01	NODE_7_length_73747_cov_12.340546_[Providencia_rettgeri_95.451_57_0.0]	NODE_7_length_73747_cov_12.340546_[Providencia_rettgeri_95.451_57_0.0]_71	65948	66421	-1	2.6e-93	protein	trim_DfrA1_like-NCBIFAM	complete
integron_01	NODE_7_length_73747_cov_12.340546_[Providencia_rettgeri_95.451_57_0.0]	NODE_7_length_73747_cov_12.340546_[Providencia_rettgeri_95.451_57_0.0]_72	66577	67590	1	7.2e-25	protein	intI	complete
integron_01	NODE_81_length_21478_cov_7.961126_[Providencia_rettgeri_99.881_63_0.0]	NODE_81_length_21478_cov_7.961126_[Providencia_rettgeri_99.881_63_0.0]_5	4761	6209	1	NA	protein	protein	CALIN
integron_01	NODE_81_length_21478_cov_7.961126_[Providencia_rettgeri_99.881_63_0.0]	attc_001	5826	5872	1	0.036	attC	attC	CALIN
integron_01	NODE_81_length_21478_cov_7.961126_[Providencia_rettgeri_99.881_63_0.0]	NODE_81_length_21478_cov_7.961126_[Providencia_rettgeri_99.881_63_0.0]_6	6254	7504	1	NA	protein	protein	CALIN
integron_01	NODE_81_length_21478_cov_7.961126_[Providencia_rettgeri_99.881_63_0.0]	NODE_81_length_21478_cov_7.961126_[Providencia_rettgeri_99.881_63_0.0]_7	7515	8336	1	NA	protein	protein	CALIN
integron_01	NODE_81_length_21478_cov_7.961126_[Providencia_rettgeri_99.881_63_0.0]	NODE_81_length_21478_cov_7.961126_[Providencia_rettgeri_99.881_63_0.0]_8	8411	9445	1	NA	protein	protein	CALIN
integron_01	NODE_81_length_21478_cov_7.961126_[Providencia_rettgeri_99.881_63_0.0]	NODE_81_length_21478_cov_7.961126_[Providencia_rettgeri_99.881_63_0.0]_9	9485	10636	1	NA	protein	protein	CALIN
integron_01	NODE_81_length_21478_cov_7.961126_[Providencia_rettgeri_99.881_63_0.0]	attc_002	9571	9614	1	0.074	attC	attC	CALIN
integron_01	NODE_135_length_11273_cov_7.106047_[Providencia_rettgeri_94.558_94_0.0]	NODE_135_length_11273_cov_7.106047_[Providencia_rettgeri_94.558_94_0.0]_10	6493	8016	1	NA	protein	protein	CALIN
integron_01	NODE_135_length_11273_cov_7.106047_[Providencia_rettgeri_94.558_94_0.0]	attc_001	6879	6950	1	0.68	attC	attC	CALIN
integron_01	NODE_135_length_11273_cov_7.106047_[Providencia_rettgeri_94.558_94_0.0]	NODE_135_length_11273_cov_7.106047_[Providencia_rettgeri_94.558_94_0.0]_11	8055	9095	-1	NA	protein	protein	CALIN
integron_01	NODE_135_length_11273_cov_7.106047_[Providencia_rettgeri_94.558_94_0.0]	attc_002	8172	8298	1	0.031	attC	attC	CALIN
# cmd: integron_finder --local-max --func-annot FGL20240223NXQR100WGS1556_S341_Klebsiella_quasipneumoniae_all.fna --cpu 20 --outdir integron_results/FGL20240223NXQR100WGS1556_S341_Klebsiella_quasipneumoniae_all
ID_integron	ID_replicon	element	pos_beg	pos_end	strand	evalue	type_elt	annotation	type
integron_01	NODE_335_length_5729_cov_3.332738_[Klebsiella_pneumoniae_100.000_100_0.0]	NODE_335_length_5729_cov_3.332738_[Klebsiella_pneumoniae_100.000_100_0.0]_1	3	593	1	8.4e-70	protein	rifampin_ARR-NCBIFAM	CALIN
integron_01	NODE_335_length_5729_cov_3.332738_[Klebsiella_pneumoniae_100.000_100_0.0]	attc_001	600	713	1	0.00038	attC	attC	CALIN
integron_01	NODE_335_length_5729_cov_3.332738_[Klebsiella_pneumoniae_100.000_100_0.0]	NODE_335_length_5729_cov_3.332738_[Klebsiella_pneumoniae_100.000_100_0.0]_2	839	2095	1	6.3e-278	protein	EreA-NCBIFAM	CALIN
integron_01	NODE_335_length_5729_cov_3.332738_[Klebsiella_pneumoniae_100.000_100_0.0]	attc_002	2121	2177	1	0.0017	attC	attC	CALIN
integron_01	NODE_335_length_5729_cov_3.332738_[Klebsiella_pneumoniae_100.000_100_0.0]	NODE_335_length_5729_cov_3.332738_[Klebsiella_pneumoniae_100.000_100_0.0]_3	2193	2969	1	9.2e-182	protein	ANT_3pp_AadA1-NCBIFAM	CALIN
integron_01	NODE_335_length_5729_cov_3.332738_[Klebsiella_pneumoniae_100.000_100_0.0]	NODE_335_length_5729_cov_3.332738_[Klebsiella_pneumoniae_100.000_100_0.0]_4	3029	3853	1	7.8e-118	protein	bla_class_D_alt-NCBIFAM	CALIN
integron_01	NODE_335_length_5729_cov_3.332738_[Klebsiella_pneumoniae_100.000_100_0.0]	attc_003	3878	3948	1	0.00036	attC	attC	CALIN
integron_01	NODE_335_length_5729_cov_3.332738_[Klebsiella_pneumoniae_100.000_100_0.0]	NODE_335_length_5729_cov_3.332738_[Klebsiella_pneumoniae_100.000_100_0.0]_5	4049	4396	1	3e-65	protein	SMR_qac_E-NCBIFAM	CALIN
integron_01	NODE_75_length_18729_cov_1.748629_[Klebsiella_quasipneumoniae_99.594_100_0.0]	NODE_75_length_18729_cov_1.748629_[Klebsiella_quasipneumoniae_99.594_100_0.0]_4	3440	5803	1	NA	protein	protein	CALIN
integron_01	NODE_75_length_18729_cov_1.748629_[Klebsiella_quasipneumoniae_99.594_100_0.0]	attc_001	5095	5157	1	0.0063	attC	attC	CALIN
integron_01	NODE_75_length_18729_cov_1.748629_[Klebsiella_quasipneumoniae_99.594_100_0.0]	attc_002	5976	6088	1	0.015	attC	attC	CALIN
integron_01	NODE_75_length_18729_cov_1.748629_[Klebsiella_quasipneumoniae_99.594_100_0.0]	NODE_75_length_18729_cov_1.748629_[Klebsiella_quasipneumoniae_99.594_100_0.0]_5	6180	7772	-1	NA	protein	protein	CALIN
integron_01	NODE_387_length_4923_cov_1.309216_[Klebsiella_quasipneumoniae_99.837_100_0.0]	NODE_387_length_4923_cov_1.309216_[Klebsiella_quasipneumoniae_99.837_100_0.0]_2	270	2756	1	NA	protein	protein	CALIN
integron_01	NODE_387_length_4923_cov_1.309216_[Klebsiella_quasipneumoniae_99.837_100_0.0]	attc_001	2024	2122	1	0.0027	attC	attC	CALIN
integron_01	NODE_387_length_4923_cov_1.309216_[Klebsiella_quasipneumoniae_99.837_100_0.0]	NODE_387_length_4923_cov_1.309216_[Klebsiella_quasipneumoniae_99.837_100_0.0]_3	2747	3742	1	NA	protein	protein	CALIN
integron_01	NODE_387_length_4923_cov_1.309216_[Klebsiella_quasipneumoniae_99.837_100_0.0]	attc_002	3121	3162	1	0.42	attC	attC	CALIN
# cmd: integron_finder --local-max --func-annot FGL20240223NXQR100WGS1557_S342_Klebsiella_pneumoniae_all.fna --cpu 20 --outdir integron_results/FGL20240223NXQR100WGS1557_S342_Klebsiella_pneumoniae_all
ID_integron	ID_replicon	element	pos_beg	pos_end	strand	evalue	type_elt	annotation	type
integron_01	NODE_137_length_2438_cov_3.289052_[Klebsiella_pneumoniae_100.000_100_0.0]	NODE_137_length_2438_cov_3.289052_[Klebsiella_pneumoniae_100.000_100_0.0]_1	254	772	1	1.1e-125	protein	AAC_6p_Ib-NCBIFAM	CALIN
integron_01	NODE_137_length_2438_cov_3.289052_[Klebsiella_pneumoniae_100.000_100_0.0]	attc_001	767	838	1	2.4e-07	attC	attC	CALIN
integron_01	NODE_137_length_2438_cov_3.289052_[Klebsiella_pneumoniae_100.000_100_0.0]	NODE_137_length_2438_cov_3.289052_[Klebsiella_pneumoniae_100.000_100_0.0]_2	903	1733	1	1.4e-199	protein	blaOXA-1_like-NCBIFAM	CALIN
integron_01	NODE_137_length_2438_cov_3.289052_[Klebsiella_pneumoniae_100.000_100_0.0]	attc_002	1753	1842	1	4.5e-07	attC	attC	CALIN
integron_01	NODE_137_length_2438_cov_3.289052_[Klebsiella_pneumoniae_100.000_100_0.0]	NODE_137_length_2438_cov_3.289052_[Klebsiella_pneumoniae_100.000_100_0.0]_3	1871	2419	1	NA	protein	protein	CALIN
# cmd: integron_finder --local-max --func-annot FGL20240223NXQR100WGS1558_S343_Proteus_mirabilis_all.fna --cpu 20 --outdir integron_results/FGL20240223NXQR100WGS1558_S343_Proteus_mirabilis_all
ID_integron	ID_replicon	element	pos_beg	pos_end	strand	evalue	type_elt	annotation	type
integron_01	NODE_5_length_96935_cov_8.039346_[Proteus_mirabilis_99.756_90_0.0]	attc_001	117	176	-1	3.1e-09	attC	attC	complete
integron_01	NODE_5_length_96935_cov_8.039346_[Proteus_mirabilis_99.756_90_0.0]	NODE_5_length_96935_cov_8.039346_[Proteus_mirabilis_99.756_90_0.0]_1	178	957	-1	6.2e-154	protein	ANT_3pp_I-NCBIFAM	complete
integron_01	NODE_5_length_96935_cov_8.039346_[Proteus_mirabilis_99.756_90_0.0]	attc_002	973	1032	-1	2.1e-06	attC	attC	complete
integron_01	NODE_5_length_96935_cov_8.039346_[Proteus_mirabilis_99.756_90_0.0]	attc_003	1293	1382	-1	6e-05	attC	attC	complete
integron_01	NODE_5_length_96935_cov_8.039346_[Proteus_mirabilis_99.756_90_0.0]	NODE_5_length_96935_cov_8.039346_[Proteus_mirabilis_99.756_90_0.0]_2	1377	1874	-1	1.5e-118	protein	trim_DfrA12-NCBIFAM	complete
integron_01	NODE_5_length_96935_cov_8.039346_[Proteus_mirabilis_99.756_90_0.0]	NODE_5_length_96935_cov_8.039346_[Proteus_mirabilis_99.756_90_0.0]_3	2019	3032	1	8.9e-25	protein	intI	complete
# cmd: integron_finder --local-max --func-annot FGL20240223NXQR100WGS1560_S345_Citrobacter_werkmanii_all.fna --cpu 20 --outdir integron_results/FGL20240223NXQR100WGS1560_S345_Citrobacter_werkmanii_all
# No Integron found
# cmd: integron_finder --local-max --func-annot FGL20240223NXQR100WGS1562_S347_Proteus_mirabilis_all.fna --cpu 20 --outdir integron_results/FGL20240223NXQR100WGS1562_S347_Proteus_mirabilis_all
ID_integron	ID_replicon	element	pos_beg	pos_end	strand	evalue	type_elt	annotation	type
integron_01	NODE_61_length_37009_cov_3.652025_[Proteus_mirabilis_99.989_99_0.0]	NODE_61_length_37009_cov_3.652025_[Proteus_mirabilis_99.989_99_0.0]_37	34268	35164	1	NA	protein	protein	CALIN
integron_01	NODE_61_length_37009_cov_3.652025_[Proteus_mirabilis_99.989_99_0.0]	attc_001	35125	35166	-1	0.19	attC	attC	CALIN
integron_01	NODE_61_length_37009_cov_3.652025_[Proteus_mirabilis_99.989_99_0.0]	NODE_61_length_37009_cov_3.652025_[Proteus_mirabilis_99.989_99_0.0]_38	35471	36760	1	NA	protein	protein	CALIN
integron_01	NODE_61_length_37009_cov_3.652025_[Proteus_mirabilis_99.989_99_0.0]	attc_002	36879	36938	-1	1.2e-09	attC	attC	CALIN
integron_01	NODE_61_length_37009_cov_3.652025_[Proteus_mirabilis_99.989_99_0.0]	NODE_61_length_37009_cov_3.652025_[Proteus_mirabilis_99.989_99_0.0]_39	36940	37008	-1	NA	protein	protein	CALIN
integron_01	NODE_622_length_2832_cov_8.564140_[Proteus_mirabilis_100.000_100_0.0]	NODE_622_length_2832_cov_8.564140_[Proteus_mirabilis_100.000_100_0.0]_1	245	718	1	2.6e-95	protein	trim_DfrA1_like-NCBIFAM	CALIN
integron_01	NODE_622_length_2832_cov_8.564140_[Proteus_mirabilis_100.000_100_0.0]	attc_001	713	807	1	0.0025	attC	attC	CALIN
integron_01	NODE_622_length_2832_cov_8.564140_[Proteus_mirabilis_100.000_100_0.0]	NODE_622_length_2832_cov_8.564140_[Proteus_mirabilis_100.000_100_0.0]_2	812	1291	1	NA	protein	protein	CALIN
integron_01	NODE_622_length_2832_cov_8.564140_[Proteus_mirabilis_100.000_100_0.0]	attc_002	1260	1319	1	0.022	attC	attC	CALIN
integron_01	NODE_622_length_2832_cov_8.564140_[Proteus_mirabilis_100.000_100_0.0]	NODE_622_length_2832_cov_8.564140_[Proteus_mirabilis_100.000_100_0.0]_3	1422	1769	1	2.1e-65	protein	SMR_qac_E-NCBIFAM	CALIN
integron_01	NODE_756_length_2212_cov_3.584652_[Proteus_mirabilis_100.000_100_0.0]	NODE_756_length_2212_cov_3.584652_[Proteus_mirabilis_100.000_100_0.0]_1	2	604	1	7.6e-93	protein	trim_DfrA1_like-NCBIFAM	CALIN
integron_01	NODE_756_length_2212_cov_3.584652_[Proteus_mirabilis_100.000_100_0.0]	attc_001	599	731	1	2e-08	attC	attC	CALIN
integron_01	NODE_756_length_2212_cov_3.584652_[Proteus_mirabilis_100.000_100_0.0]	NODE_756_length_2212_cov_3.584652_[Proteus_mirabilis_100.000_100_0.0]_2	797	2017	1	1.1e-289	protein	EreA-NCBIFAM	CALIN
integron_01	NODE_756_length_2212_cov_3.584652_[Proteus_mirabilis_100.000_100_0.0]	attc_002	2042	2098	1	0.0049	attC	attC	CALIN
# cmd: integron_finder --local-max --func-annot FGL20240223NXQR100WGS1563_S348_Citrobacter_sp_all.fna --cpu 20 --outdir integron_results/FGL20240223NXQR100WGS1563_S348_Citrobacter_sp_all
ID_integron	ID_replicon	element	pos_beg	pos_end	strand	evalue	type_elt	annotation	type
integron_01	NODE_228_length_4102_cov_1.892327	NODE_228_length_4102_cov_1.892327_3	1360	2373	-1	4.6e-26	protein	intI	complete
integron_01	NODE_228_length_4102_cov_1.892327	NODE_228_length_4102_cov_1.892327_4	2557	3015	1	NA	protein	protein	complete
integron_01	NODE_228_length_4102_cov_1.892327	attc_001	3010	3099	1	2.5e-06	attC	attC	complete
integron_01	NODE_228_length_4102_cov_1.892327	attc_002	3360	3419	1	9.1e-08	attC	attC	complete
integron_01	NODE_228_length_4102_cov_1.892327	NODE_228_length_4102_cov_1.892327_5	3423	4100	1	2.1e-138	protein	ANT_3pp_I-NCBIFAM	complete
# cmd: integron_finder --local-max --func-annot FGL20240223NXQR100WGS1564_S349_Proteus_mirabilis_all.fna --cpu 20 --outdir integron_results/FGL20240223NXQR100WGS1564_S349_Proteus_mirabilis_all
ID_integron	ID_replicon	element	pos_beg	pos_end	strand	evalue	type_elt	annotation	type
integron_01	NODE_2_length_92370_cov_8.854742_[Proteus_mirabilis_98.925_60_0.0]	NODE_2_length_92370_cov_8.854742_[Proteus_mirabilis_98.925_60_0.0]_5	2131	3144	1	8.7e-25	protein	intI	In0
integron_02	NODE_2_length_92370_cov_8.854742_[Proteus_mirabilis_98.925_60_0.0]	NODE_2_length_92370_cov_8.854742_[Proteus_mirabilis_98.925_60_0.0]_16	11962	12381	-1	NA	protein	protein	CALIN
integron_02	NODE_2_length_92370_cov_8.854742_[Proteus_mirabilis_98.925_60_0.0]	attc_001	12397	12459	-1	2.9e-07	attC	attC	CALIN
integron_02	NODE_2_length_92370_cov_8.854742_[Proteus_mirabilis_98.925_60_0.0]	NODE_2_length_92370_cov_8.854742_[Proteus_mirabilis_98.925_60_0.0]_17	12474	13412	-1	NA	protein	protein	CALIN
integron_02	NODE_2_length_92370_cov_8.854742_[Proteus_mirabilis_98.925_60_0.0]	attc_002	13282	13380	-1	0.00079	attC	attC	CALIN
integron_02	NODE_2_length_92370_cov_8.854742_[Proteus_mirabilis_98.925_60_0.0]	NODE_2_length_92370_cov_8.854742_[Proteus_mirabilis_98.925_60_0.0]_18	13375	13689	-1	NA	protein	protein	CALIN
integron_01	NODE_205_length_3166_cov_7.892728_[Proteus_mirabilis_100.000_96_0.0]	NODE_205_length_3166_cov_7.892728_[Proteus_mirabilis_100.000_96_0.0]_1	3	695	1	NA	protein	protein	CALIN
integron_01	NODE_205_length_3166_cov_7.892728_[Proteus_mirabilis_100.000_96_0.0]	attc_001	814	873	-1	1e-10	attC	attC	CALIN
integron_01	NODE_205_length_3166_cov_7.892728_[Proteus_mirabilis_100.000_96_0.0]	NODE_205_length_3166_cov_7.892728_[Proteus_mirabilis_100.000_96_0.0]_2	875	1654	-1	1.9e-155	protein	ANT_3pp_I-NCBIFAM	CALIN
integron_01	NODE_205_length_3166_cov_7.892728_[Proteus_mirabilis_100.000_96_0.0]	attc_002	1670	1726	-1	0.007	attC	attC	CALIN
integron_01	NODE_205_length_3166_cov_7.892728_[Proteus_mirabilis_100.000_96_0.0]	NODE_205_length_3166_cov_7.892728_[Proteus_mirabilis_100.000_96_0.0]_3	1751	2971	-1	1.6e-289	protein	EreA-NCBIFAM	CALIN
# cmd: integron_finder --local-max --func-annot FGL20240223NXQR100WGS1565_S350_Proteus_mirabilis_all.fna --cpu 20 --outdir integron_results/FGL20240223NXQR100WGS1565_S350_Proteus_mirabilis_all
ID_integron	ID_replicon	element	pos_beg	pos_end	strand	evalue	type_elt	annotation	type
integron_01	NODE_9_length_102328_cov_8.128071_[Proteus_mirabilis_98.868_75_0.0]	NODE_9_length_102328_cov_8.128071_[Proteus_mirabilis_98.868_75_0.0]_92	91860	92174	1	NA	protein	protein	CALIN
integron_01	NODE_9_length_102328_cov_8.128071_[Proteus_mirabilis_98.868_75_0.0]	NODE_9_length_102328_cov_8.128071_[Proteus_mirabilis_98.868_75_0.0]_93	92137	93075	1	NA	protein	protein	CALIN
integron_01	NODE_9_length_102328_cov_8.128071_[Proteus_mirabilis_98.868_75_0.0]	attc_001	92169	92267	1	0.00088	attC	attC	CALIN
integron_01	NODE_9_length_102328_cov_8.128071_[Proteus_mirabilis_98.868_75_0.0]	attc_002	93090	93152	1	3.2e-07	attC	attC	CALIN
integron_01	NODE_9_length_102328_cov_8.128071_[Proteus_mirabilis_98.868_75_0.0]	NODE_9_length_102328_cov_8.128071_[Proteus_mirabilis_98.868_75_0.0]_94	93168	93587	1	NA	protein	protein	CALIN
integron_01	NODE_40_length_37107_cov_9.298675_[Proteus_mirabilis_99.972_100_0.0]	NODE_40_length_37107_cov_9.298675_[Proteus_mirabilis_99.972_100_0.0]_29	32218	32715	-1	NA	protein	protein	CALIN
integron_01	NODE_40_length_37107_cov_9.298675_[Proteus_mirabilis_99.972_100_0.0]	attc_001	32730	32789	-1	2.9e-08	attC	attC	CALIN
integron_01	NODE_40_length_37107_cov_9.298675_[Proteus_mirabilis_99.972_100_0.0]	NODE_40_length_37107_cov_9.298675_[Proteus_mirabilis_99.972_100_0.0]_30	32791	33579	-1	4.9e-181	protein	ANT_3pp_AadA1-NCBIFAM	CALIN
integron_01	NODE_40_length_37107_cov_9.298675_[Proteus_mirabilis_99.972_100_0.0]	attc_002	33583	33642	-1	1.6e-07	attC	attC	CALIN
integron_01	NODE_40_length_37107_cov_9.298675_[Proteus_mirabilis_99.972_100_0.0]	NODE_40_length_37107_cov_9.298675_[Proteus_mirabilis_99.972_100_0.0]_31	33637	34161	-1	1.7e-127	protein	sat2-NCBIFAM	CALIN
integron_01	NODE_40_length_37107_cov_9.298675_[Proteus_mirabilis_99.972_100_0.0]	attc_003	34167	34261	-1	0.0014	attC	attC	CALIN
integron_01	NODE_40_length_37107_cov_9.298675_[Proteus_mirabilis_99.972_100_0.0]	NODE_40_length_37107_cov_9.298675_[Proteus_mirabilis_99.972_100_0.0]_32	34256	34729	-1	1.8e-94	protein	trim_DfrA1_like-NCBIFAM	CALIN
integron_01	NODE_73_length_10140_cov_5.118546_[Proteus_mirabilis_100.000_100_0.0]	NODE_73_length_10140_cov_5.118546_[Proteus_mirabilis_100.000_100_0.0]_1	229	1692	-1	NA	protein	protein	CALIN
integron_01	NODE_73_length_10140_cov_5.118546_[Proteus_mirabilis_100.000_100_0.0]	attc_001	1757	1907	-1	0.041	attC	attC	CALIN
integron_01	NODE_73_length_10140_cov_5.118546_[Proteus_mirabilis_100.000_100_0.0]	NODE_73_length_10140_cov_5.118546_[Proteus_mirabilis_100.000_100_0.0]_2	2082	2246	1	NA	protein	protein	CALIN
integron_01	NODE_73_length_10140_cov_5.118546_[Proteus_mirabilis_100.000_100_0.0]	NODE_73_length_10140_cov_5.118546_[Proteus_mirabilis_100.000_100_0.0]_3	2428	2562	-1	NA	protein	protein	CALIN
integron_01	NODE_73_length_10140_cov_5.118546_[Proteus_mirabilis_100.000_100_0.0]	NODE_73_length_10140_cov_5.118546_[Proteus_mirabilis_100.000_100_0.0]_4	2641	2778	1	NA	protein	protein	CALIN
integron_01	NODE_73_length_10140_cov_5.118546_[Proteus_mirabilis_100.000_100_0.0]	NODE_73_length_10140_cov_5.118546_[Proteus_mirabilis_100.000_100_0.0]_5	2931	3263	-1	NA	protein	protein	CALIN
integron_01	NODE_73_length_10140_cov_5.118546_[Proteus_mirabilis_100.000_100_0.0]	attc_002	3309	3360	-1	0.87	attC	attC	CALIN
integron_01	NODE_73_length_10140_cov_5.118546_[Proteus_mirabilis_100.000_100_0.0]	NODE_73_length_10140_cov_5.118546_[Proteus_mirabilis_100.000_100_0.0]_6	3503	3943	1	NA	protein	protein	CALIN
integron_01	NODE_107_length_2095_cov_10.028455_[Proteus_mirabilis_100.000_100_0.0]	NODE_107_length_2095_cov_10.028455_[Proteus_mirabilis_100.000_100_0.0]_2	736	1341	1	5.4e-134	protein	AAC_6p_Ib-NCBIFAM	CALIN
integron_01	NODE_107_length_2095_cov_10.028455_[Proteus_mirabilis_100.000_100_0.0]	attc_001	1336	1407	1	1.7e-09	attC	attC	CALIN
integron_01	NODE_107_length_2095_cov_10.028455_[Proteus_mirabilis_100.000_100_0.0]	NODE_107_length_2095_cov_10.028455_[Proteus_mirabilis_100.000_100_0.0]_3	1411	1944	1	1e-129	protein	ANT_2pp_Ia-NCBIFAM	CALIN
integron_01	NODE_107_length_2095_cov_10.028455_[Proteus_mirabilis_100.000_100_0.0]	attc_002	1939	1998	1	3.6e-08	attC	attC	CALIN
integron_01	NODE_107_length_2095_cov_10.028455_[Proteus_mirabilis_100.000_100_0.0]	NODE_107_length_2095_cov_10.028455_[Proteus_mirabilis_100.000_100_0.0]_4	2013	2093	1	NA	protein	protein	CALIN
# cmd: integron_finder --local-max --func-annot FGL20240223NXQR100WGS1566_S351_Citrobacter_werkmanii_all.fna --cpu 20 --outdir integron_results/FGL20240223NXQR100WGS1566_S351_Citrobacter_werkmanii_all
ID_integron	ID_replicon	element	pos_beg	pos_end	strand	evalue	type_elt	annotation	type
integron_01	NODE_1_length_494560_cov_4.390904_[Citrobacter_werkmanii_98.886_87_0.0]	NODE_1_length_494560_cov_4.390904_[Citrobacter_werkmanii_98.886_87_0.0]_401	432992	434005	1	4.2e-24	protein	intI	In0
# cmd: integron_finder --local-max --func-annot FGL20240223NXQR100WGS1567_S352_Morganella_morganii_all.fna --cpu 20 --outdir integron_results/FGL20240223NXQR100WGS1567_S352_Morganella_morganii_all
ID_integron	ID_replicon	element	pos_beg	pos_end	strand	evalue	type_elt	annotation	type
integron_01	NODE_9_length_130199_cov_4.211321_[Morganella_morganii_98.442_97_0.0]	NODE_9_length_130199_cov_4.211321_[Morganella_morganii_98.442_97_0.0]_113	128400	128531	-1	NA	protein	protein	complete
integron_01	NODE_9_length_130199_cov_4.211321_[Morganella_morganii_98.442_97_0.0]	attc_001	128634	128766	-1	7e-07	attC	attC	complete
integron_01	NODE_9_length_130199_cov_4.211321_[Morganella_morganii_98.442_97_0.0]	NODE_9_length_130199_cov_4.211321_[Morganella_morganii_98.442_97_0.0]_114	128761	129309	-1	2.3e-92	protein	trim_DfrA1_like-NCBIFAM	complete
integron_01	NODE_9_length_130199_cov_4.211321_[Morganella_morganii_98.442_97_0.0]	NODE_9_length_130199_cov_4.211321_[Morganella_morganii_98.442_97_0.0]_115	129392	130090	1	6.9e-10	protein	intI	complete
integron_01	NODE_27_length_45649_cov_4.665744_[Morganella_morganii_99.696_100_0.0]	NODE_27_length_45649_cov_4.665744_[Morganella_morganii_99.696_100_0.0]_5	5376	5849	1	2.2e-94	protein	trim_DfrA1_like-NCBIFAM	CALIN
integron_01	NODE_27_length_45649_cov_4.665744_[Morganella_morganii_99.696_100_0.0]	attc_001	5844	5938	1	0.0017	attC	attC	CALIN
integron_01	NODE_27_length_45649_cov_4.665744_[Morganella_morganii_99.696_100_0.0]	NODE_27_length_45649_cov_4.665744_[Morganella_morganii_99.696_100_0.0]_6	5944	6468	1	2.1e-127	protein	sat2-NCBIFAM	CALIN
integron_01	NODE_27_length_45649_cov_4.665744_[Morganella_morganii_99.696_100_0.0]	attc_002	6463	6522	1	1.9e-07	attC	attC	CALIN
integron_01	NODE_27_length_45649_cov_4.665744_[Morganella_morganii_99.696_100_0.0]	NODE_27_length_45649_cov_4.665744_[Morganella_morganii_99.696_100_0.0]_7	6526	7314	1	6e-181	protein	ANT_3pp_AadA1-NCBIFAM	CALIN
integron_01	NODE_27_length_45649_cov_4.665744_[Morganella_morganii_99.696_100_0.0]	attc_003	7316	7375	1	3.6e-08	attC	attC	CALIN
integron_01	NODE_27_length_45649_cov_4.665744_[Morganella_morganii_99.696_100_0.0]	NODE_27_length_45649_cov_4.665744_[Morganella_morganii_99.696_100_0.0]_8	7390	7887	1	NA	protein	protein	CALIN
# cmd: integron_finder --local-max --func-annot FGL20240223NXQR100WGS1568_S353_Proteus_vulgaris_all.fna --cpu 20 --outdir integron_results/FGL20240223NXQR100WGS1568_S353_Proteus_vulgaris_all
# No Integron found
# cmd: integron_finder --local-max --func-annot FGL20240223NXQR100WGS1569_S354_Escherichia_coli_all.fna --cpu 20 --outdir integron_results/FGL20240223NXQR100WGS1569_S354_Escherichia_coli_all
ID_integron	ID_replicon	element	pos_beg	pos_end	strand	evalue	type_elt	annotation	type
integron_01	NODE_46_length_10582_cov_318.535342_[Escherichia_coli_99.991_100_0.0]	NODE_46_length_10582_cov_318.535342_[Escherichia_coli_99.991_100_0.0]_11	7608	7955	-1	6.4e-65	protein	SMR_qac_E-NCBIFAM	complete
integron_01	NODE_46_length_10582_cov_318.535342_[Escherichia_coli_99.991_100_0.0]	attc_001	8058	8114	-1	0.00016	attC	attC	complete
integron_01	NODE_46_length_10582_cov_318.535342_[Escherichia_coli_99.991_100_0.0]	NODE_46_length_10582_cov_318.535342_[Escherichia_coli_99.991_100_0.0]_12	8161	8949	-1	2.6e-138	protein	ANT_3pp_I-NCBIFAM	complete
integron_01	NODE_46_length_10582_cov_318.535342_[Escherichia_coli_99.991_100_0.0]	attc_002	8953	9085	-1	1.2e-07	attC	attC	complete
integron_01	NODE_46_length_10582_cov_318.535342_[Escherichia_coli_99.991_100_0.0]	NODE_46_length_10582_cov_318.535342_[Escherichia_coli_99.991_100_0.0]_13	9080	9553	-1	1.5e-93	protein	trim_DfrA1_like-NCBIFAM	complete
integron_01	NODE_46_length_10582_cov_318.535342_[Escherichia_coli_99.991_100_0.0]	NODE_46_length_10582_cov_318.535342_[Escherichia_coli_99.991_100_0.0]_14	9711	10472	1	2e-23	protein	intI	complete
# cmd: integron_finder --local-max --func-annot FGL20240223NXQR100WGS1570_S355_Citrobacter_werkmanii_all.fna --cpu 20 --outdir integron_results/FGL20240223NXQR100WGS1570_S355_Citrobacter_werkmanii_all
ID_integron	ID_replicon	element	pos_beg	pos_end	strand	evalue	type_elt	annotation	type
integron_01	NODE_27_length_62858_cov_3.416780_[Citrobacter_cronae_97.603_68_0.0]	NODE_27_length_62858_cov_3.416780_[Citrobacter_cronae_97.603_68_0.0]_1	1	189	-1	NA	protein	protein	complete
integron_01	NODE_27_length_62858_cov_3.416780_[Citrobacter_cronae_97.603_68_0.0]	attc_001	292	351	-1	2e-09	attC	attC	complete
integron_01	NODE_27_length_62858_cov_3.416780_[Citrobacter_cronae_97.603_68_0.0]	NODE_27_length_62858_cov_3.416780_[Citrobacter_cronae_97.603_68_0.0]_2	353	1132	-1	4e-154	protein	ANT_3pp_I-NCBIFAM	complete
integron_01	NODE_27_length_62858_cov_3.416780_[Citrobacter_cronae_97.603_68_0.0]	NODE_27_length_62858_cov_3.416780_[Citrobacter_cronae_97.603_68_0.0]_3	1290	2303	1	5.7e-25	protein	intI	complete
# cmd: integron_finder --local-max --func-annot FGL20240223NXQR100WGS1571_S356_Proteus_mirabilis_all.fna --cpu 20 --outdir integron_results/FGL20240223NXQR100WGS1571_S356_Proteus_mirabilis_all
ID_integron	ID_replicon	element	pos_beg	pos_end	strand	evalue	type_elt	annotation	type
integron_01	NODE_51_length_25000_cov_3.879508_[Proteus_mirabilis_99.992_100_0.0]	NODE_51_length_25000_cov_3.879508_[Proteus_mirabilis_99.992_100_0.0]_20	20103	20600	-1	NA	protein	protein	CALIN
integron_01	NODE_51_length_25000_cov_3.879508_[Proteus_mirabilis_99.992_100_0.0]	attc_001	20615	20674	-1	1.9e-08	attC	attC	CALIN
integron_01	NODE_51_length_25000_cov_3.879508_[Proteus_mirabilis_99.992_100_0.0]	NODE_51_length_25000_cov_3.879508_[Proteus_mirabilis_99.992_100_0.0]_21	20676	21464	-1	3.6e-181	protein	ANT_3pp_AadA1-NCBIFAM	CALIN
integron_01	NODE_51_length_25000_cov_3.879508_[Proteus_mirabilis_99.992_100_0.0]	attc_002	21468	21527	-1	1.1e-07	attC	attC	CALIN
integron_01	NODE_51_length_25000_cov_3.879508_[Proteus_mirabilis_99.992_100_0.0]	NODE_51_length_25000_cov_3.879508_[Proteus_mirabilis_99.992_100_0.0]_22	21522	22046	-1	1.3e-127	protein	sat2-NCBIFAM	CALIN
integron_01	NODE_51_length_25000_cov_3.879508_[Proteus_mirabilis_99.992_100_0.0]	attc_003	22052	22146	-1	0.00092	attC	attC	CALIN
integron_01	NODE_51_length_25000_cov_3.879508_[Proteus_mirabilis_99.992_100_0.0]	NODE_51_length_25000_cov_3.879508_[Proteus_mirabilis_99.992_100_0.0]_23	22141	22614	-1	1.4e-94	protein	trim_DfrA1_like-NCBIFAM	CALIN
integron_01	NODE_97_length_14574_cov_3.281650_[Proteus_mirabilis_99.986_100_0.0]	NODE_97_length_14574_cov_3.281650_[Proteus_mirabilis_99.986_100_0.0]_11	10400	10747	-1	6.8e-65	protein	SMR_qac_E-NCBIFAM	complete
integron_01	NODE_97_length_14574_cov_3.281650_[Proteus_mirabilis_99.986_100_0.0]	attc_001	10850	10906	-1	0.00022	attC	attC	complete
integron_01	NODE_97_length_14574_cov_3.281650_[Proteus_mirabilis_99.986_100_0.0]	NODE_97_length_14574_cov_3.281650_[Proteus_mirabilis_99.986_100_0.0]_12	10953	11741	-1	2.8e-138	protein	ANT_3pp_I-NCBIFAM	complete
integron_01	NODE_97_length_14574_cov_3.281650_[Proteus_mirabilis_99.986_100_0.0]	attc_002	11745	11877	-1	1.7e-07	attC	attC	complete
integron_01	NODE_97_length_14574_cov_3.281650_[Proteus_mirabilis_99.986_100_0.0]	NODE_97_length_14574_cov_3.281650_[Proteus_mirabilis_99.986_100_0.0]_13	11872	12471	-1	1.5e-92	protein	trim_DfrA1_like-NCBIFAM	complete
integron_01	NODE_97_length_14574_cov_3.281650_[Proteus_mirabilis_99.986_100_0.0]	NODE_97_length_14574_cov_3.281650_[Proteus_mirabilis_99.986_100_0.0]_14	12503	13516	1	1.5e-25	protein	intI	complete
integron_01	NODE_122_length_10427_cov_2.164660_[Proteus_mirabilis_99.867_100_0.0]	NODE_122_length_10427_cov_2.164660_[Proteus_mirabilis_99.867_100_0.0]_9	6197	6637	-1	NA	protein	protein	CALIN
integron_01	NODE_122_length_10427_cov_2.164660_[Proteus_mirabilis_99.867_100_0.0]	attc_001	6780	6831	1	0.89	attC	attC	CALIN
integron_01	NODE_122_length_10427_cov_2.164660_[Proteus_mirabilis_99.867_100_0.0]	NODE_122_length_10427_cov_2.164660_[Proteus_mirabilis_99.867_100_0.0]_10	6877	7209	1	NA	protein	protein	CALIN
integron_01	NODE_122_length_10427_cov_2.164660_[Proteus_mirabilis_99.867_100_0.0]	NODE_122_length_10427_cov_2.164660_[Proteus_mirabilis_99.867_100_0.0]_11	7578	7712	1	NA	protein	protein	CALIN
integron_01	NODE_122_length_10427_cov_2.164660_[Proteus_mirabilis_99.867_100_0.0]	NODE_122_length_10427_cov_2.164660_[Proteus_mirabilis_99.867_100_0.0]_12	7894	8046	-1	NA	protein	protein	CALIN
integron_01	NODE_122_length_10427_cov_2.164660_[Proteus_mirabilis_99.867_100_0.0]	attc_002	8233	8383	1	0.042	attC	attC	CALIN
integron_01	NODE_122_length_10427_cov_2.164660_[Proteus_mirabilis_99.867_100_0.0]	NODE_122_length_10427_cov_2.164660_[Proteus_mirabilis_99.867_100_0.0]_13	8448	9911	1	NA	protein	protein	CALIN
# cmd: integron_finder --local-max --func-annot FGL20240223NXQR100WGS1572_S357_Escherichia_coli_all.fna --cpu 20 --outdir integron_results/FGL20240223NXQR100WGS1572_S357_Escherichia_coli_all
ID_integron	ID_replicon	element	pos_beg	pos_end	strand	evalue	type_elt	annotation	type
integron_01	NODE_92_length_16562_cov_3.360815_[Escherichia_coli_100.000_100_0.0]	NODE_92_length_16562_cov_3.360815_[Escherichia_coli_100.000_100_0.0]_7	4093	8316	-1	NA	protein	protein	CALIN
integron_01	NODE_92_length_16562_cov_3.360815_[Escherichia_coli_100.000_100_0.0]	attc_001	5191	5239	1	0.83	attC	attC	CALIN
integron_01	NODE_92_length_16562_cov_3.360815_[Escherichia_coli_100.000_100_0.0]	NODE_92_length_16562_cov_3.360815_[Escherichia_coli_100.000_100_0.0]_8	8393	12421	-1	NA	protein	protein	CALIN
integron_01	NODE_92_length_16562_cov_3.360815_[Escherichia_coli_100.000_100_0.0]	attc_002	8438	8531	1	0.13	attC	attC	CALIN
integron_01	NODE_182_length_9717_cov_3.776747_[Escherichia_coli_99.979_100_0.0]	attc_001	4788	4830	1	0.44	attC	attC	CALIN
integron_01	NODE_182_length_9717_cov_3.776747_[Escherichia_coli_99.979_100_0.0]	NODE_182_length_9717_cov_3.776747_[Escherichia_coli_99.979_100_0.0]_6	4908	6449	1	NA	protein	protein	CALIN
integron_01	NODE_182_length_9717_cov_3.776747_[Escherichia_coli_99.979_100_0.0]	attc_002	5591	5697	1	0.096	attC	attC	CALIN
# cmd: integron_finder --local-max --func-annot FGL20240223NXQR100WGS1573_S358_Enterococcus_faecium_all.fna --cpu 20 --outdir integron_results/FGL20240223NXQR100WGS1573_S358_Enterococcus_faecium_all
# No Integron found
# cmd: integron_finder --local-max --func-annot FGL20240223NXQR100WGS1574_S359_Pseudomonas_sp_all.fna --cpu 20 --outdir integron_results/FGL20240223NXQR100WGS1574_S359_Pseudomonas_sp_all
ID_integron	ID_replicon	element	pos_beg	pos_end	strand	evalue	type_elt	annotation	type
integron_01	NODE_33_length_7989_cov_4.280209	NODE_33_length_7989_cov_4.280209_7	2397	2744	-1	5.1e-65	protein	SMR_qac_E-NCBIFAM	CALIN
integron_01	NODE_33_length_7989_cov_4.280209	attc_001	2847	2916	-1	8.2e-08	attC	attC	CALIN
integron_01	NODE_33_length_7989_cov_4.280209	NODE_33_length_7989_cov_4.280209_8	2936	4195	-1	4.3e-290	protein	efflux_CmlA-NCBIFAM	CALIN
integron_01	NODE_33_length_7989_cov_4.280209	attc_002	4396	4455	-1	0.23	attC	attC	CALIN
integron_01	NODE_33_length_7989_cov_4.280209	NODE_33_length_7989_cov_4.280209_9	4516	5559	1	NA	protein	protein	CALIN
integron_01	NODE_33_length_7989_cov_4.280209	NODE_33_length_7989_cov_4.280209_10	5824	6378	-1	9.9e-116	protein	AAC_6p_set_A-NCBIFAM	CALIN
integron_01	NODE_33_length_7989_cov_4.280209	attc_003	6398	6473	-1	5.1e-05	attC	attC	CALIN
integron_01	NODE_33_length_7989_cov_4.280209	NODE_33_length_7989_cov_4.280209_11	6468	6818	-1	NA	protein	protein	CALIN
integron_01	NODE_33_length_7989_cov_4.280209	attc_004	6826	6951	-1	0.0024	attC	attC	CALIN
integron_01	NODE_33_length_7989_cov_4.280209	NODE_33_length_7989_cov_4.280209_12	6971	7627	-1	1.5e-154	protein	penta_rpt_QnrVC-NCBIFAM	CALIN
integron_01	NODE_4_length_321614_cov_4.247584	NODE_4_length_321614_cov_4.247584_1	1	840	1	1.8e-24	protein	intI	In0
# cmd: integron_finder --local-max --func-annot FGL20240223NXQR100WGS1575_S360_Citrobacter_werkmanii_all.fna --cpu 20 --outdir integron_results/FGL20240223NXQR100WGS1575_S360_Citrobacter_werkmanii_all
ID_integron	ID_replicon	element	pos_beg	pos_end	strand	evalue	type_elt	annotation	type
integron_01	NODE_34_length_46666_cov_4.798930_[Citrobacter_cronae_97.651_32_0.0]	NODE_34_length_46666_cov_4.798930_[Citrobacter_cronae_97.651_32_0.0]_35	34085	35098	-1	4.3e-25	protein	intI	complete
integron_01	NODE_34_length_46666_cov_4.798930_[Citrobacter_cronae_97.651_32_0.0]	NODE_34_length_46666_cov_4.798930_[Citrobacter_cronae_97.651_32_0.0]_36	35261	36136	1	2.7e-198	protein	blaOXA-1_like-NCBIFAM	complete
integron_01	NODE_34_length_46666_cov_4.798930_[Citrobacter_cronae_97.651_32_0.0]	attc_001	36156	36245	1	0.00024	attC	attC	complete
integron_01	NODE_34_length_46666_cov_4.798930_[Citrobacter_cronae_97.651_32_0.0]	NODE_34_length_46666_cov_4.798930_[Citrobacter_cronae_97.651_32_0.0]_37	36261	37040	1	1.6e-153	protein	ANT_3pp_I-NCBIFAM	complete
integron_01	NODE_34_length_46666_cov_4.798930_[Citrobacter_cronae_97.651_32_0.0]	attc_002	37042	37101	1	1.5e-09	attC	attC	complete
integron_01	NODE_34_length_46666_cov_4.798930_[Citrobacter_cronae_97.651_32_0.0]	NODE_34_length_46666_cov_4.798930_[Citrobacter_cronae_97.651_32_0.0]_38	37204	37551	1	2e-64	protein	SMR_qac_E-NCBIFAM	complete
# cmd: integron_finder --local-max --func-annot FGL20240223NXQR100WGS1577_S362_Escherichia_coli_all.fna --cpu 20 --outdir integron_results/FGL20240223NXQR100WGS1577_S362_Escherichia_coli_all
ID_integron	ID_replicon	element	pos_beg	pos_end	strand	evalue	type_elt	annotation	type
integron_01	NODE_63_length_3622_cov_4.120172_[Escherichia_coli_100.000_100_0.0]	NODE_63_length_3622_cov_4.120172_[Escherichia_coli_100.000_100_0.0]_3	711	1058	-1	3e-65	protein	SMR_qac_E-NCBIFAM	complete
integron_01	NODE_63_length_3622_cov_4.120172_[Escherichia_coli_100.000_100_0.0]	attc_001	1161	1217	-1	5.3e-05	attC	attC	complete
integron_01	NODE_63_length_3622_cov_4.120172_[Escherichia_coli_100.000_100_0.0]	NODE_63_length_3622_cov_4.120172_[Escherichia_coli_100.000_100_0.0]_4	1264	2052	-1	1.2e-138	protein	ANT_3pp_I-NCBIFAM	complete
integron_01	NODE_63_length_3622_cov_4.120172_[Escherichia_coli_100.000_100_0.0]	attc_002	2056	2188	-1	4.1e-08	attC	attC	complete
integron_01	NODE_63_length_3622_cov_4.120172_[Escherichia_coli_100.000_100_0.0]	NODE_63_length_3622_cov_4.120172_[Escherichia_coli_100.000_100_0.0]_5	2183	2782	-1	6.5e-93	protein	trim_DfrA1_like-NCBIFAM	complete
integron_01	NODE_63_length_3622_cov_4.120172_[Escherichia_coli_100.000_100_0.0]	NODE_63_length_3622_cov_4.120172_[Escherichia_coli_100.000_100_0.0]_6	2814	3512	1	4.2e-11	protein	intI	complete
# cmd: integron_finder --local-max --func-annot FGL20240223NXQR100WGS1578_S363_Aeromonas_veronii_all.fna --cpu 20 --outdir integron_results/FGL20240223NXQR100WGS1578_S363_Aeromonas_veronii_all
# No Integron found
# cmd: integron_finder --local-max --func-annot FGL20240223NXQR100WGS1599_S366_Escherichia_coli_all.fna --cpu 20 --outdir integron_results/FGL20240223NXQR100WGS1599_S366_Escherichia_coli_all
ID_integron	ID_replicon	element	pos_beg	pos_end	strand	evalue	type_elt	annotation	type
integron_01	NODE_61_length_10582_cov_200.907508_[Escherichia_coli_99.991_100_0.0]	NODE_61_length_10582_cov_200.907508_[Escherichia_coli_99.991_100_0.0]_11	7608	7955	-1	6.4e-65	protein	SMR_qac_E-NCBIFAM	complete
integron_01	NODE_61_length_10582_cov_200.907508_[Escherichia_coli_99.991_100_0.0]	attc_001	8058	8114	-1	0.00016	attC	attC	complete
integron_01	NODE_61_length_10582_cov_200.907508_[Escherichia_coli_99.991_100_0.0]	NODE_61_length_10582_cov_200.907508_[Escherichia_coli_99.991_100_0.0]_12	8161	8949	-1	2.6e-138	protein	ANT_3pp_I-NCBIFAM	complete
integron_01	NODE_61_length_10582_cov_200.907508_[Escherichia_coli_99.991_100_0.0]	attc_002	8953	9085	-1	1.2e-07	attC	attC	complete
integron_01	NODE_61_length_10582_cov_200.907508_[Escherichia_coli_99.991_100_0.0]	NODE_61_length_10582_cov_200.907508_[Escherichia_coli_99.991_100_0.0]_13	9080	9553	-1	1.5e-93	protein	trim_DfrA1_like-NCBIFAM	complete
integron_01	NODE_61_length_10582_cov_200.907508_[Escherichia_coli_99.991_100_0.0]	NODE_61_length_10582_cov_200.907508_[Escherichia_coli_99.991_100_0.0]_14	9711	10472	1	2e-23	protein	intI	complete
# cmd: integron_finder --local-max --func-annot FGL20240223NXQR100WGS1600_S367_Achromobacter_sp_all.fna --cpu 20 --outdir integron_results/FGL20240223NXQR100WGS1600_S367_Achromobacter_sp_all
# No Integron found
# cmd: integron_finder --local-max --func-annot FGL20240223NXQR100WGS1601_S368_Pseudomonas_aeruginosa_all.fna --cpu 20 --outdir integron_results/FGL20240223NXQR100WGS1601_S368_Pseudomonas_aeruginosa_all
ID_integron	ID_replicon	element	pos_beg	pos_end	strand	evalue	type_elt	annotation	type
integron_01	NODE_2_length_98350_cov_2.405017_[Pseudomonas_aeruginosa_99.998_93_0.0]	NODE_2_length_98350_cov_2.405017_[Pseudomonas_aeruginosa_99.998_93_0.0]_39	39363	40376	-1	8.8e-25	protein	intI	complete
integron_01	NODE_2_length_98350_cov_2.405017_[Pseudomonas_aeruginosa_99.998_93_0.0]	attc_001	40998	41109	1	1.7e-08	attC	attC	complete
integron_01	NODE_2_length_98350_cov_2.405017_[Pseudomonas_aeruginosa_99.998_93_0.0]	NODE_2_length_98350_cov_2.405017_[Pseudomonas_aeruginosa_99.998_93_0.0]_40	41320	41976	1	1.2e-153	protein	penta_rpt_QnrVC-NCBIFAM	complete
integron_01	NODE_2_length_98350_cov_2.405017_[Pseudomonas_aeruginosa_99.998_93_0.0]	attc_002	41996	42121	1	0.25	attC	attC	complete
integron_01	NODE_2_length_98350_cov_2.405017_[Pseudomonas_aeruginosa_99.998_93_0.0]	attc_003	42574	42651	1	0.0094	attC	attC	complete
integron_01	NODE_2_length_98350_cov_2.405017_[Pseudomonas_aeruginosa_99.998_93_0.0]	attc_004	43141	43254	1	0.0049	attC	attC	complete
integron_01	NODE_2_length_98350_cov_2.405017_[Pseudomonas_aeruginosa_99.998_93_0.0]	attc_005	43609	43665	1	0.00088	attC	attC	complete
integron_01	NODE_2_length_98350_cov_2.405017_[Pseudomonas_aeruginosa_99.998_93_0.0]	NODE_2_length_98350_cov_2.405017_[Pseudomonas_aeruginosa_99.998_93_0.0]_41	43681	44157	1	2.6e-67	protein	AAC_3_I-NCBIFAM	complete
integron_01	NODE_2_length_98350_cov_2.405017_[Pseudomonas_aeruginosa_99.998_93_0.0]	attc_006	44152	44229	1	6.3e-05	attC	attC	complete
integron_01	NODE_2_length_98350_cov_2.405017_[Pseudomonas_aeruginosa_99.998_93_0.0]	NODE_2_length_98350_cov_2.405017_[Pseudomonas_aeruginosa_99.998_93_0.0]_42	44326	44964	-1	NA	protein	protein	complete
# cmd: integron_finder --local-max --func-annot FGL20240223NXQR100WGS1603_S370_Enterobacter_hormaechei_all.fna --cpu 20 --outdir integron_results/FGL20240223NXQR100WGS1603_S370_Enterobacter_hormaechei_all
ID_integron	ID_replicon	element	pos_beg	pos_end	strand	evalue	type_elt	annotation	type
integron_01	NODE_185_length_7429_cov_5.030266_[Enterobacter_hormaechei_100.000_100_0.0]	NODE_185_length_7429_cov_5.030266_[Enterobacter_hormaechei_100.000_100_0.0]_7	5193	5459	-1	NA	protein	protein	complete
integron_01	NODE_185_length_7429_cov_5.030266_[Enterobacter_hormaechei_100.000_100_0.0]	attc_001	5600	5685	-1	0.0055	attC	attC	complete
integron_01	NODE_185_length_7429_cov_5.030266_[Enterobacter_hormaechei_100.000_100_0.0]	NODE_185_length_7429_cov_5.030266_[Enterobacter_hormaechei_100.000_100_0.0]_8	5680	6162	-1	1.4e-93	protein	trim_DfrA1_like-NCBIFAM	complete
integron_01	NODE_185_length_7429_cov_5.030266_[Enterobacter_hormaechei_100.000_100_0.0]	NODE_185_length_7429_cov_5.030266_[Enterobacter_hormaechei_100.000_100_0.0]_9	6309	7322	1	8.2e-26	protein	intI	complete
# cmd: integron_finder --local-max --func-annot FGL20240223NXQR100WGS1607_S374_Escherichia_coli_all.fna --cpu 20 --outdir integron_results/FGL20240223NXQR100WGS1607_S374_Escherichia_coli_all
ID_integron	ID_replicon	element	pos_beg	pos_end	strand	evalue	type_elt	annotation	type
integron_01	NODE_90_length_10165_cov_4.337916_[Escherichia_coli_99.980_100_0.0]	NODE_90_length_10165_cov_4.337916_[Escherichia_coli_99.980_100_0.0]_10	7254	7601	-1	6e-65	protein	SMR_qac_E-NCBIFAM	complete
integron_01	NODE_90_length_10165_cov_4.337916_[Escherichia_coli_99.980_100_0.0]	attc_001	7704	7760	-1	0.00015	attC	attC	complete
integron_01	NODE_90_length_10165_cov_4.337916_[Escherichia_coli_99.980_100_0.0]	NODE_90_length_10165_cov_4.337916_[Escherichia_coli_99.980_100_0.0]_11	7807	8595	-1	2.4e-138	protein	ANT_3pp_I-NCBIFAM	complete
integron_01	NODE_90_length_10165_cov_4.337916_[Escherichia_coli_99.980_100_0.0]	attc_002	8599	8731	-1	1.2e-07	attC	attC	complete
integron_01	NODE_90_length_10165_cov_4.337916_[Escherichia_coli_99.980_100_0.0]	NODE_90_length_10165_cov_4.337916_[Escherichia_coli_99.980_100_0.0]_12	8726	9199	-1	1.4e-93	protein	trim_DfrA1_like-NCBIFAM	complete
integron_01	NODE_90_length_10165_cov_4.337916_[Escherichia_coli_99.980_100_0.0]	NODE_90_length_10165_cov_4.337916_[Escherichia_coli_99.980_100_0.0]_13	9357	10055	1	8.4e-11	protein	intI	complete
# cmd: integron_finder --local-max --func-annot FGL20240223NXQR100WGS1608_S375_Enterobacter_cloacae_all.fna --cpu 20 --outdir integron_results/FGL20240223NXQR100WGS1608_S375_Enterobacter_cloacae_all
# No Integron found
# cmd: integron_finder --local-max --func-annot FGL20240223NXQR100WGS1609_S376_Proteus_mirabilis_all.fna --cpu 20 --outdir integron_results/FGL20240223NXQR100WGS1609_S376_Proteus_mirabilis_all
ID_integron	ID_replicon	element	pos_beg	pos_end	strand	evalue	type_elt	annotation	type
integron_01	NODE_68_length_19555_cov_4.083230_[Proteus_mirabilis_99.990_100_0.0]	attc_001	4970	5014	1	0.68	attC	attC	CALIN
integron_01	NODE_68_length_19555_cov_4.083230_[Proteus_mirabilis_99.990_100_0.0]	NODE_68_length_19555_cov_4.083230_[Proteus_mirabilis_99.990_100_0.0]_6	5062	5832	1	NA	protein	protein	CALIN
integron_01	NODE_68_length_19555_cov_4.083230_[Proteus_mirabilis_99.990_100_0.0]	NODE_68_length_19555_cov_4.083230_[Proteus_mirabilis_99.990_100_0.0]_7	5850	6542	1	NA	protein	protein	CALIN
integron_01	NODE_68_length_19555_cov_4.083230_[Proteus_mirabilis_99.990_100_0.0]	NODE_68_length_19555_cov_4.083230_[Proteus_mirabilis_99.990_100_0.0]_8	6536	7600	1	NA	protein	protein	CALIN
integron_01	NODE_68_length_19555_cov_4.083230_[Proteus_mirabilis_99.990_100_0.0]	NODE_68_length_19555_cov_4.083230_[Proteus_mirabilis_99.990_100_0.0]_9	7665	8486	-1	NA	protein	protein	CALIN
integron_01	NODE_68_length_19555_cov_4.083230_[Proteus_mirabilis_99.990_100_0.0]	NODE_68_length_19555_cov_4.083230_[Proteus_mirabilis_99.990_100_0.0]_10	8635	9624	1	NA	protein	protein	CALIN
integron_01	NODE_68_length_19555_cov_4.083230_[Proteus_mirabilis_99.990_100_0.0]	attc_002	8965	9147	1	0.21	attC	attC	CALIN
integron_01	NODE_598_length_1255_cov_16.304965_[Proteus_mirabilis_100.000_100_0.0]	NODE_598_length_1255_cov_16.304965_[Proteus_mirabilis_100.000_100_0.0]_1	40	1053	1	9.1e-27	protein	intI	In0
# cmd: integron_finder --local-max --func-annot FGL20240223NXQR100WGS1610_S377_Proteus_mirabilis_all.fna --cpu 20 --outdir integron_results/FGL20240223NXQR100WGS1610_S377_Proteus_mirabilis_all
ID_integron	ID_replicon	element	pos_beg	pos_end	strand	evalue	type_elt	annotation	type
integron_01	NODE_17_length_69179_cov_12.235837_[Proteus_mirabilis_99.112_61_0.0]	NODE_17_length_69179_cov_12.235837_[Proteus_mirabilis_99.112_61_0.0]_2	508	1521	1	6.5e-25	protein	intI	In0
integron_02	NODE_17_length_69179_cov_12.235837_[Proteus_mirabilis_99.112_61_0.0]	NODE_17_length_69179_cov_12.235837_[Proteus_mirabilis_99.112_61_0.0]_13	10339	10758	-1	NA	protein	protein	CALIN
integron_02	NODE_17_length_69179_cov_12.235837_[Proteus_mirabilis_99.112_61_0.0]	attc_001	10774	10836	-1	2.2e-07	attC	attC	CALIN
integron_02	NODE_17_length_69179_cov_12.235837_[Proteus_mirabilis_99.112_61_0.0]	NODE_17_length_69179_cov_12.235837_[Proteus_mirabilis_99.112_61_0.0]_14	10851	11789	-1	NA	protein	protein	CALIN
integron_02	NODE_17_length_69179_cov_12.235837_[Proteus_mirabilis_99.112_61_0.0]	attc_002	11659	11757	-1	0.00059	attC	attC	CALIN
integron_02	NODE_17_length_69179_cov_12.235837_[Proteus_mirabilis_99.112_61_0.0]	NODE_17_length_69179_cov_12.235837_[Proteus_mirabilis_99.112_61_0.0]_15	11752	12066	-1	NA	protein	protein	CALIN
integron_01	NODE_118_length_1543_cov_14.470339_[Proteus_mirabilis_100.000_100_0.0]	NODE_118_length_1543_cov_14.470339_[Proteus_mirabilis_100.000_100_0.0]_1	162	767	1	4.1e-134	protein	AAC_6p_Ib-NCBIFAM	CALIN
integron_01	NODE_118_length_1543_cov_14.470339_[Proteus_mirabilis_100.000_100_0.0]	attc_001	762	833	1	1.2e-09	attC	attC	CALIN
integron_01	NODE_118_length_1543_cov_14.470339_[Proteus_mirabilis_100.000_100_0.0]	NODE_118_length_1543_cov_14.470339_[Proteus_mirabilis_100.000_100_0.0]_2	837	1370	1	7.6e-130	protein	ANT_2pp_Ia-NCBIFAM	CALIN
integron_01	NODE_118_length_1543_cov_14.470339_[Proteus_mirabilis_100.000_100_0.0]	attc_002	1365	1424	1	2.6e-08	attC	attC	CALIN
integron_01	NODE_118_length_1543_cov_14.470339_[Proteus_mirabilis_100.000_100_0.0]	NODE_118_length_1543_cov_14.470339_[Proteus_mirabilis_100.000_100_0.0]_3	1439	1543	1	NA	protein	protein	CALIN
# cmd: integron_finder --local-max --func-annot FGL20240223NXQR100WGS1611_S378_Escherichia_coli_all.fna --cpu 20 --outdir integron_results/FGL20240223NXQR100WGS1611_S378_Escherichia_coli_all
# No Integron found
# cmd: integron_finder --local-max --func-annot FGL20240223NXQR100WGS1612_S379_Providencia_manganoxydans_all.fna --cpu 20 --outdir integron_results/FGL20240223NXQR100WGS1612_S379_Providencia_manganoxydans_all
# No Integron found
# cmd: integron_finder --local-max --func-annot FGL20240223NXQR100WGS1613_S380_Enterobacter_roggenkampii_all.fna --cpu 20 --outdir integron_results/FGL20240223NXQR100WGS1613_S380_Enterobacter_roggenkampii_all
# No Integron found
# cmd: integron_finder --local-max --func-annot FGL20240223NXQR100WGS1614_S381_Acinetobacter_baumannii_all.fna --cpu 20 --outdir integron_results/FGL20240223NXQR100WGS1614_S381_Acinetobacter_baumannii_all
# No Integron found
# cmd: integron_finder --local-max --func-annot FGL20240223NXQR100WGS1615_S382_Citrobacter_werkmanii_all.fna --cpu 20 --outdir integron_results/FGL20240223NXQR100WGS1615_S382_Citrobacter_werkmanii_all
ID_integron	ID_replicon	element	pos_beg	pos_end	strand	evalue	type_elt	annotation	type
integron_01	NODE_4_length_88628_cov_2.059920_[Citrobacter_freundii_91.916_81_0.0]	NODE_4_length_88628_cov_2.059920_[Citrobacter_freundii_91.916_81_0.0]_78	85679	86638	-1	7.3e-24	protein	intI	complete
integron_01	NODE_4_length_88628_cov_2.059920_[Citrobacter_freundii_91.916_81_0.0]	NODE_4_length_88628_cov_2.059920_[Citrobacter_freundii_91.916_81_0.0]_79	86926	87399	1	4.2e-94	protein	trim_DfrA1_like-NCBIFAM	complete
integron_01	NODE_4_length_88628_cov_2.059920_[Citrobacter_freundii_91.916_81_0.0]	attc_001	87394	87488	1	0.067	attC	attC	complete
integron_01	NODE_4_length_88628_cov_2.059920_[Citrobacter_freundii_91.916_81_0.0]	attc_002	87924	88022	1	0.17	attC	attC	complete
integron_01	NODE_4_length_88628_cov_2.059920_[Citrobacter_freundii_91.916_81_0.0]	NODE_4_length_88628_cov_2.059920_[Citrobacter_freundii_91.916_81_0.0]_80	88127	88519	1	NA	protein	protein	complete
integron_01	NODE_137_length_12669_cov_2.837586_[Citrobacter_freundii_99.919_78_0.0]	NODE_137_length_12669_cov_2.837586_[Citrobacter_freundii_99.919_78_0.0]_13	10377	11390	-1	1.4e-25	protein	intI	complete
integron_01	NODE_137_length_12669_cov_2.837586_[Citrobacter_freundii_99.919_78_0.0]	NODE_137_length_12669_cov_2.837586_[Citrobacter_freundii_99.919_78_0.0]_14	11551	12330	1	1.8e-183	protein	ANT_3pp_AadA1-NCBIFAM	complete
integron_01	NODE_137_length_12669_cov_2.837586_[Citrobacter_freundii_99.919_78_0.0]	attc_001	12332	12391	1	3.2e-10	attC	attC	complete
integron_01	NODE_137_length_12669_cov_2.837586_[Citrobacter_freundii_99.919_78_0.0]	NODE_137_length_12669_cov_2.837586_[Citrobacter_freundii_99.919_78_0.0]_15	12494	12667	1	NA	protein	protein	complete
integron_01	NODE_265_length_3354_cov_1.346142_[Citrobacter_werkmanii_98.122_100_0.0]	NODE_265_length_3354_cov_1.346142_[Citrobacter_werkmanii_98.122_100_0.0]_1	90	2033	1	NA	protein	protein	CALIN
integron_01	NODE_265_length_3354_cov_1.346142_[Citrobacter_werkmanii_98.122_100_0.0]	attc_001	1565	1617	1	0.061	attC	attC	CALIN
integron_01	NODE_265_length_3354_cov_1.346142_[Citrobacter_werkmanii_98.122_100_0.0]	NODE_265_length_3354_cov_1.346142_[Citrobacter_werkmanii_98.122_100_0.0]_2	2079	3218	-1	NA	protein	protein	CALIN
integron_01	NODE_265_length_3354_cov_1.346142_[Citrobacter_werkmanii_98.122_100_0.0]	NODE_265_length_3354_cov_1.346142_[Citrobacter_werkmanii_98.122_100_0.0]_3	3221	3352	-1	NA	protein	protein	CALIN
integron_01	NODE_265_length_3354_cov_1.346142_[Citrobacter_werkmanii_98.122_100_0.0]	attc_002	3250	3322	1	0.75	attC	attC	CALIN
# cmd: integron_finder --local-max --func-annot FGL20240223NXQR100WGS1616_S383_Proteus_mirabilis_all.fna --cpu 20 --outdir integron_results/FGL20240223NXQR100WGS1616_S383_Proteus_mirabilis_all
ID_integron	ID_replicon	element	pos_beg	pos_end	strand	evalue	type_elt	annotation	type
integron_01	NODE_5_length_91013_cov_4.395231_[Proteus_mirabilis_98.925_61_0.0]	NODE_5_length_91013_cov_4.395231_[Proteus_mirabilis_98.925_61_0.0]_2	877	1890	1	8.4e-25	protein	intI	In0
integron_02	NODE_5_length_91013_cov_4.395231_[Proteus_mirabilis_98.925_61_0.0]	NODE_5_length_91013_cov_4.395231_[Proteus_mirabilis_98.925_61_0.0]_13	10708	11127	-1	NA	protein	protein	CALIN
integron_02	NODE_5_length_91013_cov_4.395231_[Proteus_mirabilis_98.925_61_0.0]	attc_001	11143	11205	-1	2.9e-07	attC	attC	CALIN
integron_02	NODE_5_length_91013_cov_4.395231_[Proteus_mirabilis_98.925_61_0.0]	NODE_5_length_91013_cov_4.395231_[Proteus_mirabilis_98.925_61_0.0]_14	11220	12158	-1	NA	protein	protein	CALIN
integron_02	NODE_5_length_91013_cov_4.395231_[Proteus_mirabilis_98.925_61_0.0]	attc_002	12028	12126	-1	0.00078	attC	attC	CALIN
integron_02	NODE_5_length_91013_cov_4.395231_[Proteus_mirabilis_98.925_61_0.0]	NODE_5_length_91013_cov_4.395231_[Proteus_mirabilis_98.925_61_0.0]_15	12121	12435	-1	NA	protein	protein	CALIN
integron_01	NODE_120_length_9188_cov_5.077585_[Proteus_mirabilis_100.000_98_0.0]	NODE_120_length_9188_cov_5.077585_[Proteus_mirabilis_100.000_98_0.0]_1	196	1416	1	5.9e-289	protein	EreA-NCBIFAM	CALIN
integron_01	NODE_120_length_9188_cov_5.077585_[Proteus_mirabilis_100.000_98_0.0]	attc_001	1441	1497	1	0.02	attC	attC	CALIN
integron_01	NODE_120_length_9188_cov_5.077585_[Proteus_mirabilis_100.000_98_0.0]	NODE_120_length_9188_cov_5.077585_[Proteus_mirabilis_100.000_98_0.0]_2	1513	2292	1	7e-155	protein	ANT_3pp_I-NCBIFAM	CALIN
integron_01	NODE_120_length_9188_cov_5.077585_[Proteus_mirabilis_100.000_98_0.0]	attc_002	2294	2353	1	2.9e-10	attC	attC	CALIN
integron_01	NODE_120_length_9188_cov_5.077585_[Proteus_mirabilis_100.000_98_0.0]	NODE_120_length_9188_cov_5.077585_[Proteus_mirabilis_100.000_98_0.0]_3	2472	3764	-1	NA	protein	protein	CALIN
integron_01	NODE_120_length_9188_cov_5.077585_[Proteus_mirabilis_100.000_98_0.0]	attc_003	3766	3807	1	0.048	attC	attC	CALIN
integron_01	NODE_120_length_9188_cov_5.077585_[Proteus_mirabilis_100.000_98_0.0]	NODE_120_length_9188_cov_5.077585_[Proteus_mirabilis_100.000_98_0.0]_4	3768	4664	-1	NA	protein	protein	CALIN
integron_01	NODE_197_length_2000_cov_5.561666_[Proteus_mirabilis_100.000_100_0.0]	NODE_197_length_2000_cov_5.561666_[Proteus_mirabilis_100.000_100_0.0]_2	619	1224	1	5.4e-134	protein	AAC_6p_Ib-NCBIFAM	CALIN
integron_01	NODE_197_length_2000_cov_5.561666_[Proteus_mirabilis_100.000_100_0.0]	attc_001	1219	1290	1	1.6e-09	attC	attC	CALIN
integron_01	NODE_197_length_2000_cov_5.561666_[Proteus_mirabilis_100.000_100_0.0]	NODE_197_length_2000_cov_5.561666_[Proteus_mirabilis_100.000_100_0.0]_3	1294	1827	1	1e-129	protein	ANT_2pp_Ia-NCBIFAM	CALIN
integron_01	NODE_197_length_2000_cov_5.561666_[Proteus_mirabilis_100.000_100_0.0]	attc_002	1822	1881	1	3.4e-08	attC	attC	CALIN
integron_01	NODE_197_length_2000_cov_5.561666_[Proteus_mirabilis_100.000_100_0.0]	NODE_197_length_2000_cov_5.561666_[Proteus_mirabilis_100.000_100_0.0]_4	1896	2000	1	NA	protein	protein	CALIN
# cmd: integron_finder --local-max --func-annot R87_S36_Proteus_mirabilis_all.fna --cpu 20 --outdir integron_results/R87_S36_Proteus_mirabilis_all
ID_integron	ID_replicon	element	pos_beg	pos_end	strand	evalue	type_elt	annotation	type
integron_01	NODE_35_length_4718_cov_17.419734	NODE_35_length_4718_cov_17.419734_1	3	695	1	NA	protein	protein	complete
integron_01	NODE_35_length_4718_cov_17.419734	attc_001	814	873	-1	1.5e-10	attC	attC	complete
integron_01	NODE_35_length_4718_cov_17.419734	NODE_35_length_4718_cov_17.419734_2	875	1654	-1	3.2e-155	protein	ANT_3pp_I-NCBIFAM	complete
integron_01	NODE_35_length_4718_cov_17.419734	attc_002	1670	1726	-1	0.01	attC	attC	complete
integron_01	NODE_35_length_4718_cov_17.419734	NODE_35_length_4718_cov_17.419734_3	1751	2971	-1	2.7e-289	protein	EreA-NCBIFAM	complete
integron_01	NODE_35_length_4718_cov_17.419734	attc_003	3037	3169	-1	4.3e-08	attC	attC	complete
integron_01	NODE_35_length_4718_cov_17.419734	NODE_35_length_4718_cov_17.419734_4	3164	3763	-1	1.9e-92	protein	trim_DfrA1_like-NCBIFAM	complete
integron_01	NODE_35_length_4718_cov_17.419734	NODE_35_length_4718_cov_17.419734_5	3795	4718	1	3.9e-26	protein	intI	complete
# cmd: integron_finder --local-max --func-annot R87_S37_Proteus_mirabilis_all.fna --cpu 20 --outdir integron_results/R87_S37_Proteus_mirabilis_all
# No Integron found
# cmd: integron_finder --local-max --func-annot R87_S38_Proteus_mirabilis_all.fna --cpu 20 --outdir integron_results/R87_S38_Proteus_mirabilis_all
ID_integron	ID_replicon	element	pos_beg	pos_end	strand	evalue	type_elt	annotation	type
integron_01	NODE_34_length_4717_cov_10.043355	NODE_34_length_4717_cov_10.043355_1	3	695	1	NA	protein	protein	complete
integron_01	NODE_34_length_4717_cov_10.043355	attc_001	814	873	-1	1.5e-10	attC	attC	complete
integron_01	NODE_34_length_4717_cov_10.043355	NODE_34_length_4717_cov_10.043355_2	875	1654	-1	3.2e-155	protein	ANT_3pp_I-NCBIFAM	complete
integron_01	NODE_34_length_4717_cov_10.043355	attc_002	1670	1726	-1	0.01	attC	attC	complete
integron_01	NODE_34_length_4717_cov_10.043355	NODE_34_length_4717_cov_10.043355_3	1751	2971	-1	2.7e-289	protein	EreA-NCBIFAM	complete
integron_01	NODE_34_length_4717_cov_10.043355	attc_003	3037	3169	-1	4.3e-08	attC	attC	complete
integron_01	NODE_34_length_4717_cov_10.043355	NODE_34_length_4717_cov_10.043355_4	3164	3763	-1	1.9e-92	protein	trim_DfrA1_like-NCBIFAM	complete
integron_01	NODE_34_length_4717_cov_10.043355	NODE_34_length_4717_cov_10.043355_5	3795	4715	1	3.9e-26	protein	intI	complete
# cmd: integron_finder --local-max --func-annot R87_S39_Providencia_sp_all.fna --cpu 20 --outdir integron_results/R87_S39_Providencia_sp_all
# No Integron found
# cmd: integron_finder --local-max --func-annot R87_S41_Providencia_rettgeri_all.fna --cpu 20 --outdir integron_results/R87_S41_Providencia_rettgeri_all
ID_integron	ID_replicon	element	pos_beg	pos_end	strand	evalue	type_elt	annotation	type
integron_01	NODE_3_length_340495_cov_10.945391	NODE_3_length_340495_cov_10.945391_14	14197	14544	-1	1.4e-63	protein	SMR_qac_E-NCBIFAM	complete
integron_01	NODE_3_length_340495_cov_10.945391	attc_001	14647	14706	-1	8.6e-09	attC	attC	complete
integron_01	NODE_3_length_340495_cov_10.945391	NODE_3_length_340495_cov_10.945391_15	14708	15487	-1	4e-182	protein	ANT_3pp_AadA1-NCBIFAM	complete
integron_01	NODE_3_length_340495_cov_10.945391	attc_002	15503	15592	-1	0.0018	attC	attC	complete
integron_01	NODE_3_length_340495_cov_10.945391	NODE_3_length_340495_cov_10.945391_16	15612	16487	-1	2.2e-197	protein	blaOXA-1_like-NCBIFAM	complete
integron_01	NODE_3_length_340495_cov_10.945391	attc_003	16507	16578	-1	3.4e-05	attC	attC	complete
integron_01	NODE_3_length_340495_cov_10.945391	NODE_3_length_340495_cov_10.945391_17	16573	17124	-1	1.2e-130	protein	AAC_6p_Ib-NCBIFAM	complete
integron_01	NODE_3_length_340495_cov_10.945391	NODE_3_length_340495_cov_10.945391_18	17128	17601	-1	9.7e-94	protein	trim_DfrA1_like-NCBIFAM	complete
integron_01	NODE_3_length_340495_cov_10.945391	NODE_3_length_340495_cov_10.945391_19	17758	18771	1	3e-24	protein	intI	complete
# cmd: integron_finder --local-max --func-annot R87_S42_Morganella_morganii_all.fna --cpu 20 --outdir integron_results/R87_S42_Morganella_morganii_all
# No Integron found
# cmd: integron_finder --local-max --func-annot R87_S43_Escherichia_coli_all.fna --cpu 20 --outdir integron_results/R87_S43_Escherichia_coli_all
# No Integron found
# cmd: integron_finder --local-max --func-annot R87_S44_Enterobacter_cloacae_all.fna --cpu 20 --outdir integron_results/R87_S44_Enterobacter_cloacae_all
# No Integron found
# cmd: integron_finder --local-max --func-annot R87_S45_Providencia_stuartii_all.fna --cpu 20 --outdir integron_results/R87_S45_Providencia_stuartii_all
ID_integron	ID_replicon	element	pos_beg	pos_end	strand	evalue	type_elt	annotation	type
integron_01	NODE_28_length_20042_cov_5.758273	NODE_28_length_20042_cov_5.758273_21	17363	18607	-1	NA	protein	protein	CALIN
integron_01	NODE_28_length_20042_cov_5.758273	attc_001	18188	18245	-1	0.43	attC	attC	CALIN
integron_01	NODE_28_length_20042_cov_5.758273	NODE_28_length_20042_cov_5.758273_22	18696	19400	1	NA	protein	protein	CALIN
integron_01	NODE_28_length_20042_cov_5.758273	attc_002	18801	18852	-1	0.3	attC	attC	CALIN
integron_01	NODE_30_length_16070_cov_5.665809	NODE_30_length_16070_cov_5.665809_14	12534	12881	-1	8.1e-65	protein	SMR_qac_E-NCBIFAM	CALIN
integron_01	NODE_30_length_16070_cov_5.665809	attc_001	12984	13043	-1	0.13	attC	attC	CALIN
integron_01	NODE_30_length_16070_cov_5.665809	NODE_30_length_16070_cov_5.665809_15	13012	13491	-1	NA	protein	protein	CALIN
integron_01	NODE_30_length_16070_cov_5.665809	attc_002	13496	13590	-1	0.014	attC	attC	CALIN
integron_01	NODE_30_length_16070_cov_5.665809	NODE_30_length_16070_cov_5.665809_16	13585	14058	-1	9.9e-95	protein	trim_DfrA1_like-NCBIFAM	CALIN
integron_01	NODE_30_length_16070_cov_5.665809	attc_003	14073	14132	-1	2.7e-07	attC	attC	CALIN
integron_01	NODE_30_length_16070_cov_5.665809	NODE_30_length_16070_cov_5.665809_17	14127	14660	-1	4.8e-129	protein	ANT_2pp_Ia-NCBIFAM	CALIN
integron_01	NODE_30_length_16070_cov_5.665809	attc_004	14664	14735	-1	1.3e-08	attC	attC	CALIN
integron_01	NODE_30_length_16070_cov_5.665809	NODE_30_length_16070_cov_5.665809_18	14730	15335	-1	2.6e-133	protein	AAC_6p_Ib-NCBIFAM	CALIN
# cmd: integron_finder --local-max --func-annot R87_S46_Morganella_morganii_all.fna --cpu 20 --outdir integron_results/R87_S46_Morganella_morganii_all
# No Integron found
# cmd: integron_finder --local-max --func-annot R87_S47_Providencia_sp._2.29_all.fna --cpu 20 --outdir integron_results/R87_S47_Providencia_sp._2.29_all
# No Integron found
# cmd: integron_finder --local-max --func-annot R87_S48_Providencia_manganoxydans_all.fna --cpu 20 --outdir integron_results/R87_S48_Providencia_manganoxydans_all
# No Integron found
# cmd: integron_finder --local-max --func-annot R87_S50_Providencia_rettgeri_all.fna --cpu 20 --outdir integron_results/R87_S50_Providencia_rettgeri_all
# No Integron found
# cmd: integron_finder --local-max --func-annot R87_S51_Escherichia_coli_all.fna --cpu 20 --outdir integron_results/R87_S51_Escherichia_coli_all
ID_integron	ID_replicon	element	pos_beg	pos_end	strand	evalue	type_elt	annotation	type
integron_01	NODE_73_length_3602_cov_3.941007	NODE_73_length_3602_cov_3.941007_2	108	806	-1	5.5e-11	protein	intI	complete
integron_01	NODE_73_length_3602_cov_3.941007	NODE_73_length_3602_cov_3.941007_3	838	1437	1	5.6e-93	protein	trim_DfrA1_like-NCBIFAM	complete
integron_01	NODE_73_length_3602_cov_3.941007	attc_001	1432	1564	1	4.1e-08	attC	attC	complete
integron_01	NODE_73_length_3602_cov_3.941007	NODE_73_length_3602_cov_3.941007_4	1568	2356	1	1e-138	protein	ANT_3pp_I-NCBIFAM	complete
integron_01	NODE_73_length_3602_cov_3.941007	attc_002	2403	2459	1	5.3e-05	attC	attC	complete
integron_01	NODE_73_length_3602_cov_3.941007	NODE_73_length_3602_cov_3.941007_5	2562	2909	1	2.6e-65	protein	SMR_qac_E-NCBIFAM	complete
# cmd: integron_finder --local-max --func-annot R87_S52_Providencia_manganoxydans_all.fna --cpu 20 --outdir integron_results/R87_S52_Providencia_manganoxydans_all
# No Integron found
# cmd: integron_finder --local-max --func-annot R87_S53_Morganella_morganii_all.fna --cpu 20 --outdir integron_results/R87_S53_Morganella_morganii_all
# No Integron found
# cmd: integron_finder --local-max --func-annot R87_S54_Enterobacter_asburiae_all.fna --cpu 20 --outdir integron_results/R87_S54_Enterobacter_asburiae_all
# No Integron found
# cmd: integron_finder --local-max --func-annot R87_S55_Providencia_manganoxydans_all.fna --cpu 20 --outdir integron_results/R87_S55_Providencia_manganoxydans_all
# No Integron found
# cmd: integron_finder --local-max --func-annot R87_S56_Providencia_manganoxydans_all.fna --cpu 20 --outdir integron_results/R87_S56_Providencia_manganoxydans_all
# No Integron found
# cmd: integron_finder --local-max --func-annot R87_S57_Enterobacter_asburiae_all.fna --cpu 20 --outdir integron_results/R87_S57_Enterobacter_asburiae_all
# No Integron found
# cmd: integron_finder --local-max --func-annot R87_S58_Proteus_vulgaris_all.fna --cpu 20 --outdir integron_results/R87_S58_Proteus_vulgaris_all
# No Integron found
# cmd: integron_finder --local-max --func-annot R87_S59_Providencia_rettgeri_all.fna --cpu 20 --outdir integron_results/R87_S59_Providencia_rettgeri_all
ID_integron	ID_replicon	element	pos_beg	pos_end	strand	evalue	type_elt	annotation	type
integron_01	NODE_5_length_118848_cov_5.469740	NODE_5_length_118848_cov_5.469740_18	11070	12221	-1	NA	protein	protein	CALIN
integron_01	NODE_5_length_118848_cov_5.469740	attc_001	12092	12135	-1	0.41	attC	attC	CALIN
integron_01	NODE_5_length_118848_cov_5.469740	NODE_5_length_118848_cov_5.469740_19	12261	13295	-1	NA	protein	protein	CALIN
integron_01	NODE_5_length_118848_cov_5.469740	NODE_5_length_118848_cov_5.469740_20	13370	14191	-1	NA	protein	protein	CALIN
integron_01	NODE_5_length_118848_cov_5.469740	NODE_5_length_118848_cov_5.469740_21	14202	14426	-1	NA	protein	protein	CALIN
integron_01	NODE_5_length_118848_cov_5.469740	NODE_5_length_118848_cov_5.469740_22	14423	15679	-1	NA	protein	protein	CALIN
integron_01	NODE_5_length_118848_cov_5.469740	NODE_5_length_118848_cov_5.469740_23	15724	17172	-1	NA	protein	protein	CALIN
integron_01	NODE_5_length_118848_cov_5.469740	attc_002	16061	16107	-1	0.2	attC	attC	CALIN
# cmd: integron_finder --local-max --func-annot R87_S60_Providencia_manganoxydans_all.fna --cpu 20 --outdir integron_results/R87_S60_Providencia_manganoxydans_all
# No Integron found
# cmd: integron_finder --local-max --func-annot R87_S61_Morganella_morganii_all.fna --cpu 20 --outdir integron_results/R87_S61_Morganella_morganii_all
ID_integron	ID_replicon	element	pos_beg	pos_end	strand	evalue	type_elt	annotation	type
integron_01	NODE_21_length_71014_cov_8.179525	NODE_21_length_71014_cov_8.179525_36	37671	38168	-1	NA	protein	protein	CALIN
integron_01	NODE_21_length_71014_cov_8.179525	attc_001	38183	38242	-1	5.5e-08	attC	attC	CALIN
integron_01	NODE_21_length_71014_cov_8.179525	NODE_21_length_71014_cov_8.179525_37	38244	39032	-1	8.8e-181	protein	ANT_3pp_AadA1-NCBIFAM	CALIN
integron_01	NODE_21_length_71014_cov_8.179525	attc_002	39036	39095	-1	3e-07	attC	attC	CALIN
integron_01	NODE_21_length_71014_cov_8.179525	NODE_21_length_71014_cov_8.179525_38	39090	39614	-1	3.1e-127	protein	sat2-NCBIFAM	CALIN
integron_01	NODE_21_length_71014_cov_8.179525	attc_003	39620	39714	-1	0.0026	attC	attC	CALIN
integron_01	NODE_21_length_71014_cov_8.179525	NODE_21_length_71014_cov_8.179525_39	39709	40182	-1	3.3e-94	protein	trim_DfrA1_like-NCBIFAM	CALIN
# cmd: integron_finder --local-max --func-annot R87_S62_Morganella_morganii_all.fna --cpu 20 --outdir integron_results/R87_S62_Morganella_morganii_all
ID_integron	ID_replicon	element	pos_beg	pos_end	strand	evalue	type_elt	annotation	type
integron_01	NODE_5_length_266240_cov_9.571317	NODE_5_length_266240_cov_9.571317_35	36881	37378	-1	NA	protein	protein	CALIN
integron_01	NODE_5_length_266240_cov_9.571317	attc_001	37393	37452	-1	2.1e-07	attC	attC	CALIN
integron_01	NODE_5_length_266240_cov_9.571317	NODE_5_length_266240_cov_9.571317_36	37454	38242	-1	3.4e-180	protein	ANT_3pp_AadA1-NCBIFAM	CALIN
integron_01	NODE_5_length_266240_cov_9.571317	attc_002	38246	38305	-1	1.1e-06	attC	attC	CALIN
integron_01	NODE_5_length_266240_cov_9.571317	NODE_5_length_266240_cov_9.571317_37	38300	38824	-1	1.2e-126	protein	sat2-NCBIFAM	CALIN
integron_01	NODE_5_length_266240_cov_9.571317	attc_003	38830	38924	-1	0.0098	attC	attC	CALIN
integron_01	NODE_5_length_266240_cov_9.571317	NODE_5_length_266240_cov_9.571317_38	38919	39392	-1	1.3e-93	protein	trim_DfrA1_like-NCBIFAM	CALIN
# cmd: integron_finder --local-max --func-annot R87_S63_Morganella_morganii_all.fna --cpu 20 --outdir integron_results/R87_S63_Morganella_morganii_all
ID_integron	ID_replicon	element	pos_beg	pos_end	strand	evalue	type_elt	annotation	type
integron_01	NODE_20_length_71207_cov_9.065293	NODE_20_length_71207_cov_9.065293_36	37864	38361	-1	NA	protein	protein	CALIN
integron_01	NODE_20_length_71207_cov_9.065293	attc_001	38376	38435	-1	5.5e-08	attC	attC	CALIN
integron_01	NODE_20_length_71207_cov_9.065293	NODE_20_length_71207_cov_9.065293_37	38437	39225	-1	8.8e-181	protein	ANT_3pp_AadA1-NCBIFAM	CALIN
integron_01	NODE_20_length_71207_cov_9.065293	attc_002	39229	39288	-1	3e-07	attC	attC	CALIN
integron_01	NODE_20_length_71207_cov_9.065293	NODE_20_length_71207_cov_9.065293_38	39283	39807	-1	3.1e-127	protein	sat2-NCBIFAM	CALIN
integron_01	NODE_20_length_71207_cov_9.065293	attc_003	39813	39907	-1	0.0026	attC	attC	CALIN
integron_01	NODE_20_length_71207_cov_9.065293	NODE_20_length_71207_cov_9.065293_39	39902	40375	-1	3.3e-94	protein	trim_DfrA1_like-NCBIFAM	CALIN
# cmd: integron_finder --local-max --func-annot R87_S64_Proteus_mirabilis_all.fna --cpu 20 --outdir integron_results/R87_S64_Proteus_mirabilis_all
ID_integron	ID_replicon	element	pos_beg	pos_end	strand	evalue	type_elt	annotation	type
integron_01	NODE_38_length_4718_cov_14.614463	NODE_38_length_4718_cov_14.614463_1	1	924	-1	3.9e-26	protein	intI	complete
integron_01	NODE_38_length_4718_cov_14.614463	NODE_38_length_4718_cov_14.614463_2	956	1555	1	1.9e-92	protein	trim_DfrA1_like-NCBIFAM	complete
integron_01	NODE_38_length_4718_cov_14.614463	attc_001	1550	1682	1	4.3e-08	attC	attC	complete
integron_01	NODE_38_length_4718_cov_14.614463	NODE_38_length_4718_cov_14.614463_3	1748	2968	1	2.7e-289	protein	EreA-NCBIFAM	complete
integron_01	NODE_38_length_4718_cov_14.614463	attc_002	2993	3049	1	0.01	attC	attC	complete
integron_01	NODE_38_length_4718_cov_14.614463	NODE_38_length_4718_cov_14.614463_4	3065	3844	1	3.2e-155	protein	ANT_3pp_I-NCBIFAM	complete
integron_01	NODE_38_length_4718_cov_14.614463	attc_003	3846	3905	1	1.5e-10	attC	attC	complete
integron_01	NODE_38_length_4718_cov_14.614463	NODE_38_length_4718_cov_14.614463_5	4024	4716	-1	NA	protein	protein	complete
# cmd: integron_finder --local-max --func-annot R87_S65_Providencia_manganoxydans_all.fna --cpu 20 --outdir integron_results/R87_S65_Providencia_manganoxydans_all
ID_integron	ID_replicon	element	pos_beg	pos_end	strand	evalue	type_elt	annotation	type
integron_01	NODE_3_length_289209_cov_5.843487	NODE_3_length_289209_cov_5.843487_258	276454	277467	-1	2.5e-24	protein	intI	complete
integron_01	NODE_3_length_289209_cov_5.843487	NODE_3_length_289209_cov_5.843487_259	277624	278097	1	1.4e-93	protein	trim_DfrA1_like-NCBIFAM	complete
integron_01	NODE_3_length_289209_cov_5.843487	attc_001	278092	278186	1	0.26	attC	attC	complete
integron_01	NODE_3_length_289209_cov_5.843487	NODE_3_length_289209_cov_5.843487_260	278236	278670	1	NA	protein	protein	complete
# cmd: integron_finder --local-max --func-annot R87_S66_Morganella_morganii_all.fna --cpu 20 --outdir integron_results/R87_S66_Morganella_morganii_all
# No Integron found
# cmd: integron_finder --local-max --func-annot R87_S67_Providencia_manganoxydans_all.fna --cpu 20 --outdir integron_results/R87_S67_Providencia_manganoxydans_all
ID_integron	ID_replicon	element	pos_beg	pos_end	strand	evalue	type_elt	annotation	type
integron_01	NODE_2_length_294911_cov_7.899883	NODE_2_length_294911_cov_7.899883_2	211	645	-1	NA	protein	protein	complete
integron_01	NODE_2_length_294911_cov_7.899883	attc_001	695	789	-1	0.26	attC	attC	complete
integron_01	NODE_2_length_294911_cov_7.899883	NODE_2_length_294911_cov_7.899883_3	784	1257	-1	1.5e-93	protein	trim_DfrA1_like-NCBIFAM	complete
integron_01	NODE_2_length_294911_cov_7.899883	NODE_2_length_294911_cov_7.899883_4	1414	2427	1	2.6e-24	protein	intI	complete
# cmd: integron_finder --local-max --func-annot R87_S68_Morganella_morganii_all.fna --cpu 20 --outdir integron_results/R87_S68_Morganella_morganii_all
ID_integron	ID_replicon	element	pos_beg	pos_end	strand	evalue	type_elt	annotation	type
integron_01	NODE_6_length_246876_cov_9.380585	NODE_6_length_246876_cov_9.380585_1	54	758	-1	NA	protein	protein	complete
integron_01	NODE_6_length_246876_cov_9.380585	attc_001	840	909	-1	2.5e-06	attC	attC	complete
integron_01	NODE_6_length_246876_cov_9.380585	NODE_6_length_246876_cov_9.380585_2	929	2188	-1	6.9e-289	protein	efflux_CmlA-NCBIFAM	complete
integron_01	NODE_6_length_246876_cov_9.380585	attc_002	2389	2502	-1	0.012	attC	attC	complete
integron_01	NODE_6_length_246876_cov_9.380585	NODE_6_length_246876_cov_9.380585_3	2509	2961	-1	1.1e-68	protein	rifampin_ARR-NCBIFAM	complete
integron_01	NODE_6_length_246876_cov_9.380585	NODE_6_length_246876_cov_9.380585_4	3134	4147	1	2.1e-24	protein	intI	complete
# cmd: integron_finder --local-max --func-annot R87_S69_Providencia_rettgeri_all.fna --cpu 20 --outdir integron_results/R87_S69_Providencia_rettgeri_all
ID_integron	ID_replicon	element	pos_beg	pos_end	strand	evalue	type_elt	annotation	type
integron_01	NODE_5_length_297845_cov_9.927085	NODE_5_length_297845_cov_9.927085_241	296456	297415	-1	4.3e-23	protein	intI	In0
integron_01	NODE_12_length_94675_cov_11.016679	NODE_12_length_94675_cov_11.016679_77	88319	89332	-1	7.7e-25	protein	intI	In0
integron_02	NODE_12_length_94675_cov_11.016679	NODE_12_length_94675_cov_11.016679_82	92597	93463	-1	6e-25	protein	intI	complete
integron_02	NODE_12_length_94675_cov_11.016679	NODE_12_length_94675_cov_11.016679_83	93640	94239	1	1.5e-131	protein	AAC_6p_Ib-NCBIFAM	complete
integron_02	NODE_12_length_94675_cov_11.016679	attc_001	94234	94305	1	6.2e-06	attC	attC	complete
integron_02	NODE_12_length_94675_cov_11.016679	NODE_12_length_94675_cov_11.016679_84	94408	94674	1	NA	protein	protein	complete
# cmd: integron_finder --local-max --func-annot R87_S70_Aeromonas_dhakensis_all.fna --cpu 20 --outdir integron_results/R87_S70_Aeromonas_dhakensis_all
ID_integron	ID_replicon	element	pos_beg	pos_end	strand	evalue	type_elt	annotation	type
integron_01	NODE_2_length_421401_cov_5.921237	attc_001	258486	258578	1	0.0002	attC	attC	CALIN
integron_01	NODE_2_length_421401_cov_5.921237	NODE_2_length_421401_cov_5.921237_266	258632	259342	1	NA	protein	protein	CALIN
integron_01	NODE_2_length_421401_cov_5.921237	NODE_2_length_421401_cov_5.921237_267	259526	260059	1	NA	protein	protein	CALIN
integron_01	NODE_2_length_421401_cov_5.921237	attc_002	260062	260187	1	0.0025	attC	attC	CALIN
# cmd: integron_finder --local-max --func-annot R87_S71_Morganella_morganii_all.fna --cpu 20 --outdir integron_results/R87_S71_Morganella_morganii_all
# No Integron found
# cmd: integron_finder --local-max --func-annot R87_S72_Providencia_manganoxydans_all.fna --cpu 20 --outdir integron_results/R87_S72_Providencia_manganoxydans_all
# No Integron found
# cmd: integron_finder --local-max --func-annot R87_S73_Providencia_rettgeri_all.fna --cpu 20 --outdir integron_results/R87_S73_Providencia_rettgeri_all
# No Integron found
# cmd: integron_finder --local-max --func-annot R87_S74_Providencia_manganoxydans_all.fna --cpu 20 --outdir integron_results/R87_S74_Providencia_manganoxydans_all
# No Integron found
# cmd: integron_finder --local-max --func-annot R87_S75_Providencia_manganoxydans_all.fna --cpu 20 --outdir integron_results/R87_S75_Providencia_manganoxydans_all
# No Integron found
# cmd: integron_finder --local-max --func-annot R87_S76_Providencia_rettgeri_all.fna --cpu 20 --outdir integron_results/R87_S76_Providencia_rettgeri_all
# No Integron found
# cmd: integron_finder --local-max --func-annot R87_S77_Enterobacter_roggenkampii_all.fna --cpu 20 --outdir integron_results/R87_S77_Enterobacter_roggenkampii_all
ID_integron	ID_replicon	element	pos_beg	pos_end	strand	evalue	type_elt	annotation	type
integron_01	NODE_12_length_141562_cov_10.918563	NODE_12_length_141562_cov_10.918563_128	136987	137334	-1	5.7e-64	protein	SMR_qac_E-NCBIFAM	complete
integron_01	NODE_12_length_141562_cov_10.918563	attc_001	137437	137496	-1	3.6e-09	attC	attC	complete
integron_01	NODE_12_length_141562_cov_10.918563	NODE_12_length_141562_cov_10.918563_129	137498	138277	-1	3.2e-182	protein	ANT_3pp_AadA1-NCBIFAM	complete
integron_01	NODE_12_length_141562_cov_10.918563	attc_002	138293	138387	-1	0.0011	attC	attC	complete
integron_01	NODE_12_length_141562_cov_10.918563	NODE_12_length_141562_cov_10.918563_130	138382	138855	-1	5.5e-94	protein	trim_DfrA1_like-NCBIFAM	complete
integron_01	NODE_12_length_141562_cov_10.918563	NODE_12_length_141562_cov_10.918563_131	139012	140025	1	1.2e-24	protein	intI	complete
# cmd: integron_finder --local-max --func-annot R87_S78_Escherichia_coli_all.fna --cpu 20 --outdir integron_results/R87_S78_Escherichia_coli_all
ID_integron	ID_replicon	element	pos_beg	pos_end	strand	evalue	type_elt	annotation	type
integron_01	NODE_68_length_3621_cov_4.590155	NODE_68_length_3621_cov_4.590155_3	711	1058	-1	3e-65	protein	SMR_qac_E-NCBIFAM	complete
integron_01	NODE_68_length_3621_cov_4.590155	attc_001	1161	1217	-1	5.3e-05	attC	attC	complete
integron_01	NODE_68_length_3621_cov_4.590155	NODE_68_length_3621_cov_4.590155_4	1264	2052	-1	1.2e-138	protein	ANT_3pp_I-NCBIFAM	complete
integron_01	NODE_68_length_3621_cov_4.590155	attc_002	2056	2188	-1	4.1e-08	attC	attC	complete
integron_01	NODE_68_length_3621_cov_4.590155	NODE_68_length_3621_cov_4.590155_5	2183	2782	-1	6.5e-93	protein	trim_DfrA1_like-NCBIFAM	complete
integron_01	NODE_68_length_3621_cov_4.590155	NODE_68_length_3621_cov_4.590155_6	2814	3512	1	4.2e-11	protein	intI	complete
# cmd: integron_finder --local-max --func-annot R87_S79_Providencia_rettgeri_all.fna --cpu 20 --outdir integron_results/R87_S79_Providencia_rettgeri_all
ID_integron	ID_replicon	element	pos_beg	pos_end	strand	evalue	type_elt	annotation	type
integron_01	NODE_8_length_264921_cov_8.782657	NODE_8_length_264921_cov_8.782657_57	44964	46115	-1	NA	protein	protein	CALIN
integron_01	NODE_8_length_264921_cov_8.782657	attc_001	45986	46029	-1	0.92	attC	attC	CALIN
integron_01	NODE_8_length_264921_cov_8.782657	NODE_8_length_264921_cov_8.782657_58	46155	47189	-1	NA	protein	protein	CALIN
integron_01	NODE_8_length_264921_cov_8.782657	NODE_8_length_264921_cov_8.782657_59	47264	48085	-1	NA	protein	protein	CALIN
integron_01	NODE_8_length_264921_cov_8.782657	NODE_8_length_264921_cov_8.782657_60	48096	49346	-1	NA	protein	protein	CALIN
integron_01	NODE_8_length_264921_cov_8.782657	NODE_8_length_264921_cov_8.782657_61	49391	50839	-1	NA	protein	protein	CALIN
integron_01	NODE_8_length_264921_cov_8.782657	attc_002	49728	49774	-1	0.44	attC	attC	CALIN
# cmd: integron_finder --local-max --func-annot R87_S80_Enterococcus_faecium_all.fna --cpu 20 --outdir integron_results/R87_S80_Enterococcus_faecium_all
# No Integron found
# cmd: integron_finder --local-max --func-annot R87_S81_Enterococcus_faecium_all.fna --cpu 20 --outdir integron_results/R87_S81_Enterococcus_faecium_all
# No Integron found
# cmd: integron_finder --local-max --func-annot R87_S82_Morganella_morganii_all.fna --cpu 20 --outdir integron_results/R87_S82_Morganella_morganii_all
ID_integron	ID_replicon	element	pos_beg	pos_end	strand	evalue	type_elt	annotation	type
integron_01	NODE_1_length_517050_cov_6.097897	NODE_1_length_517050_cov_6.097897_205	199161	199508	-1	2.2e-63	protein	SMR_qac_E-NCBIFAM	complete
integron_01	NODE_1_length_517050_cov_6.097897	attc_001	199611	199670	-1	1.6e-08	attC	attC	complete
integron_01	NODE_1_length_517050_cov_6.097897	NODE_1_length_517050_cov_6.097897_206	199672	200451	-1	3.3e-153	protein	ANT_3pp_I-NCBIFAM	complete
integron_01	NODE_1_length_517050_cov_6.097897	attc_002	200467	200526	-1	1.1e-05	attC	attC	complete
integron_01	NODE_1_length_517050_cov_6.097897	attc_003	200787	200876	-1	0.00032	attC	attC	complete
integron_01	NODE_1_length_517050_cov_6.097897	NODE_1_length_517050_cov_6.097897_207	200871	201368	-1	8e-118	protein	trim_DfrA12-NCBIFAM	complete
integron_01	NODE_1_length_517050_cov_6.097897	NODE_1_length_517050_cov_6.097897_208	201513	202526	1	4.7e-24	protein	intI	complete
# cmd: integron_finder --local-max --func-annot R87_S84_Enterococcus_faecium_all.fna --cpu 20 --outdir integron_results/R87_S84_Enterococcus_faecium_all
# No Integron found
# cmd: integron_finder --local-max --func-annot R87_S85_Morganella_morganii_all.fna --cpu 20 --outdir integron_results/R87_S85_Morganella_morganii_all
ID_integron	ID_replicon	element	pos_beg	pos_end	strand	evalue	type_elt	annotation	type
integron_01	NODE_5_length_267096_cov_8.220284	NODE_5_length_267096_cov_8.220284_211	226743	227216	1	1.3e-93	protein	trim_DfrA1_like-NCBIFAM	CALIN
integron_01	NODE_5_length_267096_cov_8.220284	attc_001	227211	227305	1	0.0099	attC	attC	CALIN
integron_01	NODE_5_length_267096_cov_8.220284	NODE_5_length_267096_cov_8.220284_212	227311	227835	1	1.2e-126	protein	sat2-NCBIFAM	CALIN
integron_01	NODE_5_length_267096_cov_8.220284	attc_002	227830	227889	1	1.1e-06	attC	attC	CALIN
integron_01	NODE_5_length_267096_cov_8.220284	NODE_5_length_267096_cov_8.220284_213	227893	228681	1	3.5e-180	protein	ANT_3pp_AadA1-NCBIFAM	CALIN
integron_01	NODE_5_length_267096_cov_8.220284	attc_003	228683	228742	1	2.1e-07	attC	attC	CALIN
integron_01	NODE_5_length_267096_cov_8.220284	NODE_5_length_267096_cov_8.220284_214	228757	229254	1	NA	protein	protein	CALIN
# cmd: integron_finder --local-max --func-annot R87_S86_Enterococcus_faecium_all.fna --cpu 20 --outdir integron_results/R87_S86_Enterococcus_faecium_all
# No Integron found
# cmd: integron_finder --local-max --func-annot R87_S87_Morganella_morganii_all.fna --cpu 20 --outdir integron_results/R87_S87_Morganella_morganii_all
ID_integron	ID_replicon	element	pos_beg	pos_end	strand	evalue	type_elt	annotation	type
integron_01	NODE_20_length_68566_cov_6.058636	NODE_20_length_68566_cov_6.058636_23	28274	28747	1	3.2e-94	protein	trim_DfrA1_like-NCBIFAM	CALIN
integron_01	NODE_20_length_68566_cov_6.058636	attc_001	28742	28836	1	0.0025	attC	attC	CALIN
integron_01	NODE_20_length_68566_cov_6.058636	NODE_20_length_68566_cov_6.058636_24	28842	29366	1	3e-127	protein	sat2-NCBIFAM	CALIN
integron_01	NODE_20_length_68566_cov_6.058636	attc_002	29361	29420	1	2.9e-07	attC	attC	CALIN
integron_01	NODE_20_length_68566_cov_6.058636	NODE_20_length_68566_cov_6.058636_25	29424	30212	1	8.5e-181	protein	ANT_3pp_AadA1-NCBIFAM	CALIN
integron_01	NODE_20_length_68566_cov_6.058636	attc_003	30214	30273	1	5.3e-08	attC	attC	CALIN
integron_01	NODE_20_length_68566_cov_6.058636	NODE_20_length_68566_cov_6.058636_26	30288	30785	1	NA	protein	protein	CALIN
# cmd: integron_finder --local-max --func-annot R87_S88_Enterococcus_faecium_all.fna --cpu 20 --outdir integron_results/R87_S88_Enterococcus_faecium_all
# No Integron found
# cmd: integron_finder --local-max --func-annot R87_S89_Enterococcus_faecium_all.fna --cpu 20 --outdir integron_results/R87_S89_Enterococcus_faecium_all
# No Integron found
# cmd: integron_finder --local-max --func-annot R87_S90_Enterococcus_faecium_all.fna --cpu 20 --outdir integron_results/R87_S90_Enterococcus_faecium_all
# No Integron found
# cmd: integron_finder --local-max --func-annot R87_S91_Proteus_mirabilis_all.fna --cpu 20 --outdir integron_results/R87_S91_Proteus_mirabilis_all
ID_integron	ID_replicon	element	pos_beg	pos_end	strand	evalue	type_elt	annotation	type
integron_01	NODE_8_length_193659_cov_19.934574	NODE_8_length_193659_cov_19.934574_196	188091	189104	-1	1.8e-24	protein	intI	complete
integron_01	NODE_8_length_193659_cov_19.934574	NODE_8_length_193659_cov_19.934574_197	189136	189735	1	7.5e-91	protein	trim_DfrA1_like-NCBIFAM	complete
integron_01	NODE_8_length_193659_cov_19.934574	attc_001	189730	189862	1	1.8e-06	attC	attC	complete
integron_01	NODE_8_length_193659_cov_19.934574	NODE_8_length_193659_cov_19.934574_198	189928	191148	1	1.1e-287	protein	EreA-NCBIFAM	complete
integron_01	NODE_8_length_193659_cov_19.934574	attc_002	191173	191229	1	0.43	attC	attC	complete
integron_01	NODE_8_length_193659_cov_19.934574	NODE_8_length_193659_cov_19.934574_199	191245	192024	1	1.3e-153	protein	ANT_3pp_I-NCBIFAM	complete
integron_01	NODE_8_length_193659_cov_19.934574	attc_003	192026	192085	1	6.2e-09	attC	attC	complete
integron_01	NODE_8_length_193659_cov_19.934574	NODE_8_length_193659_cov_19.934574_200	192204	193202	-1	NA	protein	protein	complete
# cmd: integron_finder --local-max --func-annot R87_S92_Enterococcus_faecium_all.fna --cpu 20 --outdir integron_results/R87_S92_Enterococcus_faecium_all
# No Integron found
# cmd: integron_finder --local-max --func-annot R87_S93_Morganella_morganii_all.fna --cpu 20 --outdir integron_results/R87_S93_Morganella_morganii_all
ID_integron	ID_replicon	element	pos_beg	pos_end	strand	evalue	type_elt	annotation	type
integron_01	NODE_13_length_147130_cov_7.316143	NODE_13_length_147130_cov_7.316143_101	106838	107311	1	7.3e-94	protein	trim_DfrA1_like-NCBIFAM	CALIN
integron_01	NODE_13_length_147130_cov_7.316143	attc_001	107306	107400	1	0.0054	attC	attC	CALIN
integron_01	NODE_13_length_147130_cov_7.316143	NODE_13_length_147130_cov_7.316143_102	107406	107930	1	6.9e-127	protein	sat2-NCBIFAM	CALIN
integron_01	NODE_13_length_147130_cov_7.316143	attc_002	107925	107984	1	6.2e-07	attC	attC	CALIN
integron_01	NODE_13_length_147130_cov_7.316143	NODE_13_length_147130_cov_7.316143_103	107988	108776	1	1.9e-180	protein	ANT_3pp_AadA1-NCBIFAM	CALIN
integron_01	NODE_13_length_147130_cov_7.316143	attc_003	108778	108837	1	1.1e-07	attC	attC	CALIN
integron_01	NODE_13_length_147130_cov_7.316143	NODE_13_length_147130_cov_7.316143_104	108852	109349	1	NA	protein	protein	CALIN
# cmd: integron_finder --local-max --func-annot R87_S94_Enterococcus_faecium_all.fna --cpu 20 --outdir integron_results/R87_S94_Enterococcus_faecium_all
# No Integron found
# cmd: integron_finder --local-max --func-annot R87_S95_Morganella_morganii_all.fna --cpu 20 --outdir integron_results/R87_S95_Morganella_morganii_all
# No Integron found
# cmd: integron_finder --local-max --func-annot R87_S96_Enterococcus_faecium_all.fna --cpu 20 --outdir integron_results/R87_S96_Enterococcus_faecium_all
# No Integron found
# cmd: integron_finder --local-max --func-annot R91_S61_Providencia_manganoxydans_all.fna --cpu 20 --outdir integron_results/R91_S61_Providencia_manganoxydans_all
# No Integron found
# cmd: integron_finder --local-max --func-annot R91_S62_Providencia_sp_all.fna --cpu 20 --outdir integron_results/R91_S62_Providencia_sp_all
# No Integron found
# cmd: integron_finder --local-max --func-annot R91_S63_Morganella_morganii_all.fna --cpu 20 --outdir integron_results/R91_S63_Morganella_morganii_all
ID_integron	ID_replicon	element	pos_beg	pos_end	strand	evalue	type_elt	annotation	type
integron_01	NODE_40_length_9209_cov_22.828452	NODE_40_length_9209_cov_22.828452_5	4833	5426	1	NA	protein	protein	complete
integron_01	NODE_40_length_9209_cov_22.828452	attc_001	4979	5057	1	0.23	attC	attC	complete
integron_01	NODE_40_length_9209_cov_22.828452	NODE_40_length_9209_cov_22.828452_6	5423	6370	1	NA	protein	protein	complete
integron_01	NODE_40_length_9209_cov_22.828452	NODE_40_length_9209_cov_22.828452_7	6678	7520	1	NA	protein	protein	complete
integron_01	NODE_40_length_9209_cov_22.828452	NODE_40_length_9209_cov_22.828452_8	7517	7948	1	NA	protein	protein	complete
integron_01	NODE_40_length_9209_cov_22.828452	NODE_40_length_9209_cov_22.828452_9	7935	8096	1	NA	protein	protein	complete
integron_01	NODE_40_length_9209_cov_22.828452	NODE_40_length_9209_cov_22.828452_10	8074	8457	1	NA	protein	protein	complete
integron_01	NODE_40_length_9209_cov_22.828452	NODE_40_length_9209_cov_22.828452_11	8751	9209	-1	2.3e-26	protein	intI	complete
# cmd: integron_finder --local-max --func-annot R91_S64_Providencia_manganoxydans_all.fna --cpu 20 --outdir integron_results/R91_S64_Providencia_manganoxydans_all
# No Integron found
# cmd: integron_finder --local-max --func-annot R91_S65_Providencia_manganoxydans_all.fna --cpu 20 --outdir integron_results/R91_S65_Providencia_manganoxydans_all
# No Integron found
# cmd: integron_finder --local-max --func-annot R91_S66_Morganella_morganii_all.fna --cpu 20 --outdir integron_results/R91_S66_Morganella_morganii_all
ID_integron	ID_replicon	element	pos_beg	pos_end	strand	evalue	type_elt	annotation	type
integron_01	NODE_7_length_206399_cov_18.437277	NODE_7_length_206399_cov_18.437277_194	202947	203960	-1	1.8e-24	protein	intI	complete
integron_01	NODE_7_length_206399_cov_18.437277	NODE_7_length_206399_cov_18.437277_195	204133	204585	1	9.6e-69	protein	rifampin_ARR-NCBIFAM	complete
integron_01	NODE_7_length_206399_cov_18.437277	attc_001	204592	204705	1	0.01	attC	attC	complete
integron_01	NODE_7_length_206399_cov_18.437277	NODE_7_length_206399_cov_18.437277_196	204906	206165	1	5.9e-289	protein	efflux_CmlA-NCBIFAM	complete
integron_01	NODE_7_length_206399_cov_18.437277	attc_002	206185	206254	1	2.1e-06	attC	attC	complete
integron_01	NODE_7_length_206399_cov_18.437277	NODE_7_length_206399_cov_18.437277_197	206336	206398	1	NA	protein	protein	complete
# cmd: integron_finder --local-max --func-annot R91_S67_Providencia_sp_all.fna --cpu 20 --outdir integron_results/R91_S67_Providencia_sp_all
# No Integron found
# cmd: integron_finder --local-max --func-annot R91_S68_Morganella_morganii_all.fna --cpu 20 --outdir integron_results/R91_S68_Morganella_morganii_all
# No Integron found
# cmd: integron_finder --local-max --func-annot R91_S69_Morganella_morganii_all.fna --cpu 20 --outdir integron_results/R91_S69_Morganella_morganii_all
# No Integron found
# cmd: integron_finder --local-max --func-annot R91_S70_Pseudomonas_putida_all.fna --cpu 20 --outdir integron_results/R91_S70_Pseudomonas_putida_all
ID_integron	ID_replicon	element	pos_beg	pos_end	strand	evalue	type_elt	annotation	type
integron_01	NODE_1_length_662963_cov_13.632491	NODE_1_length_662963_cov_13.632491_227	247701	248714	-1	5.6e-24	protein	intI	In0
# cmd: integron_finder --local-max --func-annot R91_S71_Escherichia_coli_all.fna --cpu 20 --outdir integron_results/R91_S71_Escherichia_coli_all
# No Integron found
# cmd: integron_finder --local-max --func-annot R91_S72_Escherichia_coli_all.fna --cpu 20 --outdir integron_results/R91_S72_Escherichia_coli_all
# No Integron found
# cmd: integron_finder --local-max --func-annot R91_S73_Citrobacter_portucalensis_all.fna --cpu 20 --outdir integron_results/R91_S73_Citrobacter_portucalensis_all
# No Integron found
# cmd: integron_finder --local-max --func-annot R91_S74_Pseudomonas_putida_all.fna --cpu 20 --outdir integron_results/R91_S74_Pseudomonas_putida_all
ID_integron	ID_replicon	element	pos_beg	pos_end	strand	evalue	type_elt	annotation	type
integron_01	NODE_307_length_3163_cov_19.388669	NODE_307_length_3163_cov_19.388669_1	56	244	-1	NA	protein	protein	CALIN
integron_01	NODE_307_length_3163_cov_19.388669	attc_001	106	175	-1	1.6e-05	attC	attC	CALIN
integron_01	NODE_307_length_3163_cov_19.388669	NODE_307_length_3163_cov_19.388669_2	195	1454	-1	1.2e-290	protein	efflux_CmlA-NCBIFAM	CALIN
integron_01	NODE_307_length_3163_cov_19.388669	attc_002	1655	1768	-1	0.00016	attC	attC	CALIN
integron_01	NODE_307_length_3163_cov_19.388669	NODE_307_length_3163_cov_19.388669_3	1775	2227	-1	1.9e-70	protein	rifampin_ARR-NCBIFAM	CALIN
integron_01	NODE_307_length_3163_cov_19.388669	attc_003	1823	1923	-1	0.66	attC	attC	CALIN
integron_01	NODE_307_length_3163_cov_19.388669	attc_004	2258	2313	-1	1.8e-05	attC	attC	CALIN
integron_01	NODE_307_length_3163_cov_19.388669	NODE_307_length_3163_cov_19.388669_4	2268	3023	-1	2.6e-183	protein	blaDIM-NCBIFAM	CALIN
# cmd: integron_finder --local-max --func-annot R91_S75_Aeromonas_sp_all.fna --cpu 20 --outdir integron_results/R91_S75_Aeromonas_sp_all
ID_integron	ID_replicon	element	pos_beg	pos_end	strand	evalue	type_elt	annotation	type
integron_01	NODE_5_length_176371_cov_11.859825	NODE_5_length_176371_cov_11.859825_3	2272	3012	-1	NA	protein	protein	CALIN
integron_01	NODE_5_length_176371_cov_11.859825	attc_001	3023	3082	-1	2.1e-07	attC	attC	CALIN
integron_01	NODE_5_length_176371_cov_11.859825	NODE_5_length_176371_cov_11.859825_4	3250	3474	-1	NA	protein	protein	CALIN
integron_01	NODE_5_length_176371_cov_11.859825	attc_002	3488	3564	-1	6.1e-06	attC	attC	CALIN
integron_01	NODE_5_length_176371_cov_11.859825	NODE_5_length_176371_cov_11.859825_5	3559	4290	-1	NA	protein	protein	CALIN
integron_01	NODE_5_length_176371_cov_11.859825	attc_003	4318	4388	-1	0.18	attC	attC	CALIN
integron_01	NODE_5_length_176371_cov_11.859825	NODE_5_length_176371_cov_11.859825_6	4389	5348	-1	NA	protein	protein	CALIN
# cmd: integron_finder --local-max --func-annot R91_S76_Escherichia_coli_all.fna --cpu 20 --outdir integron_results/R91_S76_Escherichia_coli_all
ID_integron	ID_replicon	element	pos_beg	pos_end	strand	evalue	type_elt	annotation	type
integron_01	NODE_51_length_28921_cov_10.556574	NODE_51_length_28921_cov_10.556574_8	6335	7453	-1	3.6e-25	protein	intI	complete
integron_01	NODE_51_length_28921_cov_10.556574	NODE_51_length_28921_cov_10.556574_9	7610	8083	1	1.4e-94	protein	trim_DfrA1_like-NCBIFAM	complete
integron_01	NODE_51_length_28921_cov_10.556574	attc_001	8078	8172	1	0.00023	attC	attC	complete
integron_01	NODE_51_length_28921_cov_10.556574	NODE_51_length_28921_cov_10.556574_10	8188	8967	1	6.4e-181	protein	ANT_3pp_AadA1-NCBIFAM	complete
integron_01	NODE_51_length_28921_cov_10.556574	attc_002	8969	9028	1	7.3e-10	attC	attC	complete
integron_01	NODE_51_length_28921_cov_10.556574	NODE_51_length_28921_cov_10.556574_11	9131	9478	1	1.5e-64	protein	SMR_qac_E-NCBIFAM	complete
# cmd: integron_finder --local-max --func-annot R91_S77_Escherichia_coli_all.fna --cpu 20 --outdir integron_results/R91_S77_Escherichia_coli_all
ID_integron	ID_replicon	element	pos_beg	pos_end	strand	evalue	type_elt	annotation	type
integron_01	NODE_12_length_159486_cov_17.237257	NODE_12_length_159486_cov_17.237257_147	159028	159486	-1	3.1e-25	protein	intI	In0
# cmd: integron_finder --local-max --func-annot R91_S78_Morganella_morganii_all.fna --cpu 20 --outdir integron_results/R91_S78_Morganella_morganii_all
ID_integron	ID_replicon	element	pos_beg	pos_end	strand	evalue	type_elt	annotation	type
integron_01	NODE_34_length_7089_cov_18.144355	NODE_34_length_7089_cov_18.144355_1	1	459	1	1.7e-26	protein	intI	In0
# cmd: integron_finder --local-max --func-annot R91_S79_Escherichia_coli_all.fna --cpu 20 --outdir integron_results/R91_S79_Escherichia_coli_all
# No Integron found
# cmd: integron_finder --local-max --func-annot R91_S80_Morganella_morganii_all.fna --cpu 20 --outdir integron_results/R91_S80_Morganella_morganii_all
ID_integron	ID_replicon	element	pos_beg	pos_end	strand	evalue	type_elt	annotation	type
integron_01	NODE_4_length_262614_cov_22.929958	NODE_4_length_262614_cov_22.929958_209	222873	223397	1	1.2e-126	protein	sat2-NCBIFAM	CALIN
integron_01	NODE_4_length_262614_cov_22.929958	attc_001	223392	223451	1	1.1e-06	attC	attC	CALIN
integron_01	NODE_4_length_262614_cov_22.929958	NODE_4_length_262614_cov_22.929958_210	223455	224243	1	3.4e-180	protein	ANT_3pp_AadA1-NCBIFAM	CALIN
integron_01	NODE_4_length_262614_cov_22.929958	attc_002	224245	224304	1	2e-07	attC	attC	CALIN
integron_01	NODE_4_length_262614_cov_22.929958	NODE_4_length_262614_cov_22.929958_211	224319	224816	1	NA	protein	protein	CALIN
integron_01	NODE_22_length_1984_cov_28.089930	NODE_22_length_1984_cov_28.089930_2	174	773	1	7e-133	protein	AAC_6p_Ib-NCBIFAM	CALIN
integron_01	NODE_22_length_1984_cov_28.089930	attc_001	768	839	1	2e-07	attC	attC	CALIN
integron_01	NODE_22_length_1984_cov_28.089930	NODE_22_length_1984_cov_28.089930_3	859	1734	1	2.3e-199	protein	blaOXA-1_like-NCBIFAM	CALIN
integron_01	NODE_22_length_1984_cov_28.089930	attc_002	1754	1843	1	1e-05	attC	attC	CALIN
integron_01	NODE_22_length_1984_cov_28.089930	NODE_22_length_1984_cov_28.089930_4	1859	1984	1	NA	protein	protein	CALIN
# cmd: integron_finder --local-max --func-annot R91_S81_Enterobacter_cloacae_all.fna --cpu 20 --outdir integron_results/R91_S81_Enterobacter_cloacae_all
# No Integron found
# cmd: integron_finder --local-max --func-annot R91_S82_Morganella_morganii_all.fna --cpu 20 --outdir integron_results/R91_S82_Morganella_morganii_all
ID_integron	ID_replicon	element	pos_beg	pos_end	strand	evalue	type_elt	annotation	type
integron_01	NODE_7_length_138090_cov_11.201974	NODE_7_length_138090_cov_11.201974_2	1142	1489	-1	5.1e-64	protein	SMR_qac_E-NCBIFAM	complete
integron_01	NODE_7_length_138090_cov_11.201974	attc_001	1592	1724	-1	7.4e-07	attC	attC	complete
integron_01	NODE_7_length_138090_cov_11.201974	NODE_7_length_138090_cov_11.201974_3	1719	2267	-1	2.4e-92	protein	trim_DfrA1_like-NCBIFAM	complete
integron_01	NODE_7_length_138090_cov_11.201974	NODE_7_length_138090_cov_11.201974_4	2350	3363	1	1.1e-24	protein	intI	complete
# cmd: integron_finder --local-max --func-annot R91_S83_Aeromonas_veronii_all.fna --cpu 20 --outdir integron_results/R91_S83_Aeromonas_veronii_all
ID_integron	ID_replicon	element	pos_beg	pos_end	strand	evalue	type_elt	annotation	type
integron_01	NODE_7_length_180531_cov_15.347110	NODE_7_length_180531_cov_15.347110_172	177070	177417	-1	7.5e-64	protein	SMR_qac_E-NCBIFAM	CALIN
integron_01	NODE_7_length_180531_cov_15.347110	attc_001	177520	177579	-1	4.5e-09	attC	attC	CALIN
integron_01	NODE_7_length_180531_cov_15.347110	NODE_7_length_180531_cov_15.347110_173	177581	178396	-1	2.5e-182	protein	ANT_3pp_AadA1-NCBIFAM	CALIN
integron_01	NODE_7_length_180531_cov_15.347110	NODE_7_length_180531_cov_15.347110_174	178389	179189	-1	1.2e-190	protein	blaOXA-10_like-NCBIFAM	CALIN
integron_01	NODE_7_length_180531_cov_15.347110	attc_002	179365	179425	-1	9.3e-06	attC	attC	CALIN
integron_01	NODE_7_length_180531_cov_15.347110	NODE_7_length_180531_cov_15.347110_175	179426	179743	-1	NA	protein	protein	CALIN
integron_01	NODE_7_length_180531_cov_15.347110	attc_003	179764	179834	-1	0.00087	attC	attC	CALIN
integron_01	NODE_7_length_180531_cov_15.347110	NODE_7_length_180531_cov_15.347110_176	179829	180530	-1	9.1e-132	protein	AAC_6p_Ib-NCBIFAM	CALIN
integron_01	NODE_18_length_87328_cov_15.523308	NODE_18_length_87328_cov_15.523308_1	39	1052	1	7.6e-25	protein	intI	In0
integron_01	NODE_28_length_54310_cov_13.957957	attc_001	4494	4559	-1	0.016	attC	attC	CALIN
integron_01	NODE_28_length_54310_cov_13.957957	NODE_28_length_54310_cov_13.957957_6	4560	5180	-1	NA	protein	protein	CALIN
integron_01	NODE_28_length_54310_cov_13.957957	NODE_28_length_54310_cov_13.957957_7	5218	5886	-1	NA	protein	protein	CALIN
integron_01	NODE_28_length_54310_cov_13.957957	attc_002	5924	5996	-1	0.79	attC	attC	CALIN
integron_01	NODE_28_length_54310_cov_13.957957	NODE_28_length_54310_cov_13.957957_8	6019	6378	-1	NA	protein	protein	CALIN
integron_01	NODE_29_length_51815_cov_16.160714	NODE_29_length_51815_cov_16.160714_1	340	996	1	2e-148	protein	penta_rpt_QnrVC-NCBIFAM	CALIN
integron_01	NODE_29_length_51815_cov_16.160714	attc_001	1017	1144	1	0.0042	attC	attC	CALIN
integron_01	NODE_29_length_51815_cov_16.160714	NODE_29_length_51815_cov_16.160714_2	1253	1585	1	3e-70	protein	SMR_qac_FL-NCBIFAM	CALIN
integron_01	NODE_29_length_51815_cov_16.160714	attc_002	1596	1655	1	2.9e-06	attC	attC	CALIN
integron_01	NODE_29_length_51815_cov_16.160714	NODE_29_length_51815_cov_16.160714_3	1660	2142	1	7.5e-93	protein	trim_DfrA1_like-NCBIFAM	CALIN
integron_01	NODE_29_length_51815_cov_16.160714	attc_003	2137	2222	1	0.039	attC	attC	CALIN
integron_01	NODE_29_length_51815_cov_16.160714	NODE_29_length_51815_cov_16.160714_4	2363	2629	1	NA	protein	protein	CALIN
# cmd: integron_finder --local-max --func-annot R91_S84_Aeromonas_veronii_all.fna --cpu 20 --outdir integron_results/R91_S84_Aeromonas_veronii_all
ID_integron	ID_replicon	element	pos_beg	pos_end	strand	evalue	type_elt	annotation	type
integron_01	NODE_23_length_72274_cov_21.197375	NODE_23_length_72274_cov_21.197375_1	340	996	1	2.6e-148	protein	penta_rpt_QnrVC-NCBIFAM	CALIN
integron_01	NODE_23_length_72274_cov_21.197375	attc_001	1017	1144	1	0.0059	attC	attC	CALIN
integron_01	NODE_23_length_72274_cov_21.197375	NODE_23_length_72274_cov_21.197375_2	1253	1585	1	3.7e-70	protein	SMR_qac_FL-NCBIFAM	CALIN
integron_01	NODE_23_length_72274_cov_21.197375	attc_002	1596	1655	1	4e-06	attC	attC	CALIN
integron_01	NODE_23_length_72274_cov_21.197375	NODE_23_length_72274_cov_21.197375_3	1660	2142	1	9.5e-93	protein	trim_DfrA1_like-NCBIFAM	CALIN
integron_01	NODE_23_length_72274_cov_21.197375	attc_003	2137	2222	1	0.054	attC	attC	CALIN
integron_01	NODE_23_length_72274_cov_21.197375	NODE_23_length_72274_cov_21.197375_4	2363	2629	1	NA	protein	protein	CALIN
integron_01	NODE_29_length_54119_cov_17.703438	NODE_29_length_54119_cov_17.703438_45	47742	48101	1	NA	protein	protein	CALIN
integron_01	NODE_29_length_54119_cov_17.703438	attc_001	48124	48196	1	0.79	attC	attC	CALIN
integron_01	NODE_29_length_54119_cov_17.703438	NODE_29_length_54119_cov_17.703438_46	48234	48902	1	NA	protein	protein	CALIN
integron_01	NODE_29_length_54119_cov_17.703438	NODE_29_length_54119_cov_17.703438_47	48940	49560	1	NA	protein	protein	CALIN
integron_01	NODE_29_length_54119_cov_17.703438	attc_002	49561	49626	1	0.016	attC	attC	CALIN
# cmd: integron_finder --local-max --func-annot R91_S86_Morganella_morganii_all.fna --cpu 20 --outdir integron_results/R91_S86_Morganella_morganii_all
# No Integron found
# cmd: integron_finder --local-max --func-annot R91_S87_Enterococcus_faecium_all.fna --cpu 20 --outdir integron_results/R91_S87_Enterococcus_faecium_all
# No Integron found
# cmd: integron_finder --local-max --func-annot R91_S90_Morganella_morganii_all.fna --cpu 20 --outdir integron_results/R91_S90_Morganella_morganii_all
ID_integron	ID_replicon	element	pos_beg	pos_end	strand	evalue	type_elt	annotation	type
integron_01	NODE_7_length_309424_cov_20.947326	NODE_7_length_309424_cov_20.947326_247	269109	269582	1	1.5e-93	protein	trim_DfrA1_like-NCBIFAM	CALIN
integron_01	NODE_7_length_309424_cov_20.947326	attc_001	269577	269671	1	0.011	attC	attC	CALIN
integron_01	NODE_7_length_309424_cov_20.947326	NODE_7_length_309424_cov_20.947326_248	269677	270201	1	1.4e-126	protein	sat2-NCBIFAM	CALIN
integron_01	NODE_7_length_309424_cov_20.947326	attc_002	270196	270255	1	1.3e-06	attC	attC	CALIN
integron_01	NODE_7_length_309424_cov_20.947326	NODE_7_length_309424_cov_20.947326_249	270259	271047	1	4e-180	protein	ANT_3pp_AadA1-NCBIFAM	CALIN
integron_01	NODE_7_length_309424_cov_20.947326	attc_003	271049	271108	1	2.4e-07	attC	attC	CALIN
integron_01	NODE_7_length_309424_cov_20.947326	NODE_7_length_309424_cov_20.947326_250	271123	271620	1	NA	protein	protein	CALIN
# cmd: integron_finder --local-max --func-annot R91_S91_Enterococcus_faecium_all.fna --cpu 20 --outdir integron_results/R91_S91_Enterococcus_faecium_all
# No Integron found
# cmd: integron_finder --local-max --func-annot R94_S101_Escherichia_coli_all.fna --cpu 20 --outdir integron_results/R94_S101_Escherichia_coli_all
ID_integron	ID_replicon	element	pos_beg	pos_end	strand	evalue	type_elt	annotation	type
integron_01	NODE_141_length_3649_cov_6.973311	NODE_141_length_3649_cov_6.973311_2	270	1016	-1	NA	protein	protein	CALIN
integron_01	NODE_141_length_3649_cov_6.973311	NODE_141_length_3649_cov_6.973311_3	1031	2572	-1	NA	protein	protein	CALIN
integron_01	NODE_141_length_3649_cov_6.973311	attc_001	1076	1118	-1	0.41	attC	attC	CALIN
integron_01	NODE_141_length_3649_cov_6.973311	attc_002	1783	1889	-1	0.036	attC	attC	CALIN
integron_01	NODE_141_length_3649_cov_6.973311	attc_003	2650	2692	-1	0.16	attC	attC	CALIN
# cmd: integron_finder --local-max --func-annot R94_S102_Escherichia_coli_all.fna --cpu 20 --outdir integron_results/R94_S102_Escherichia_coli_all
ID_integron	ID_replicon	element	pos_beg	pos_end	strand	evalue	type_elt	annotation	type
integron_01	NODE_22_length_76692_cov_8.279318	NODE_22_length_76692_cov_8.279318_73	75405	75878	1	3.9e-94	protein	trim_DfrA1_like-NCBIFAM	CALIN
integron_01	NODE_22_length_76692_cov_8.279318	attc_001	75873	75967	1	0.0028	attC	attC	CALIN
integron_01	NODE_22_length_76692_cov_8.279318	NODE_22_length_76692_cov_8.279318_74	75973	76497	1	3.7e-127	protein	sat2-NCBIFAM	CALIN
integron_01	NODE_22_length_76692_cov_8.279318	attc_002	76492	76551	1	3.2e-07	attC	attC	CALIN
integron_01	NODE_22_length_76692_cov_8.279318	NODE_22_length_76692_cov_8.279318_75	76555	76692	1	NA	protein	protein	CALIN
# cmd: integron_finder --local-max --func-annot R94_S104_Klebsiella_pneumoniae_all.fna --cpu 20 --outdir integron_results/R94_S104_Klebsiella_pneumoniae_all
ID_integron	ID_replicon	element	pos_beg	pos_end	strand	evalue	type_elt	annotation	type
integron_01	NODE_139_length_3118_cov_2.900702	NODE_139_length_3118_cov_2.900702_1	137	742	1	6.8e-134	protein	AAC_6p_Ib-NCBIFAM	CALIN
integron_01	NODE_139_length_3118_cov_2.900702	attc_001	737	808	1	4.5e-07	attC	attC	CALIN
integron_01	NODE_139_length_3118_cov_2.900702	NODE_139_length_3118_cov_2.900702_2	824	1600	1	6.6e-182	protein	ANT_3pp_AadA1-NCBIFAM	CALIN
integron_01	NODE_139_length_3118_cov_2.900702	NODE_139_length_3118_cov_2.900702_3	1660	1995	1	NA	protein	protein	CALIN
integron_01	NODE_139_length_3118_cov_2.900702	NODE_139_length_3118_cov_2.900702_4	2125	2484	1	NA	protein	protein	CALIN
integron_01	NODE_139_length_3118_cov_2.900702	attc_002	2509	2579	1	0.0002	attC	attC	CALIN
integron_01	NODE_139_length_3118_cov_2.900702	NODE_139_length_3118_cov_2.900702_5	2750	3001	1	NA	protein	protein	CALIN
integron_01	NODE_79_length_16833_cov_5.735065	NODE_79_length_16833_cov_5.735065_4	4926	5939	-1	1.4e-25	protein	intI	complete
integron_01	NODE_79_length_16833_cov_5.735065	NODE_79_length_16833_cov_5.735065_5	6084	6581	1	2.3e-119	protein	trim_DfrA12-NCBIFAM	complete
integron_01	NODE_79_length_16833_cov_5.735065	attc_001	6576	6665	1	1e-05	attC	attC	complete
integron_01	NODE_79_length_16833_cov_5.735065	attc_002	6926	6985	1	3.7e-07	attC	attC	complete
integron_01	NODE_79_length_16833_cov_5.735065	NODE_79_length_16833_cov_5.735065_6	7001	7780	1	9.6e-155	protein	ANT_3pp_I-NCBIFAM	complete
integron_01	NODE_79_length_16833_cov_5.735065	attc_003	7782	7841	1	5.4e-10	attC	attC	complete
integron_01	NODE_79_length_16833_cov_5.735065	NODE_79_length_16833_cov_5.735065_7	7944	8291	1	6.4e-65	protein	SMR_qac_E-NCBIFAM	complete
# cmd: integron_finder --local-max --func-annot R94_S105_Escherichia_coli_all.fna --cpu 20 --outdir integron_results/R94_S105_Escherichia_coli_all
ID_integron	ID_replicon	element	pos_beg	pos_end	strand	evalue	type_elt	annotation	type
integron_01	NODE_86_length_7165_cov_11.840864	NODE_86_length_7165_cov_11.840864_1	193	1059	1	7.8e-26	protein	intI	In0
# cmd: integron_finder --local-max --func-annot R94_S106_Escherichia_coli_all.fna --cpu 20 --outdir integron_results/R94_S106_Escherichia_coli_all
ID_integron	ID_replicon	element	pos_beg	pos_end	strand	evalue	type_elt	annotation	type
integron_01	NODE_77_length_11193_cov_18.654708	NODE_77_length_11193_cov_18.654708_9	6581	6928	-1	6e-65	protein	SMR_qac_E-NCBIFAM	complete
integron_01	NODE_77_length_11193_cov_18.654708	attc_001	7031	7090	-1	3.6e-10	attC	attC	complete
integron_01	NODE_77_length_11193_cov_18.654708	NODE_77_length_11193_cov_18.654708_10	7092	7871	-1	8.9e-155	protein	ANT_3pp_I-NCBIFAM	complete
integron_01	NODE_77_length_11193_cov_18.654708	attc_002	7887	7946	-1	2.5e-07	attC	attC	complete
integron_01	NODE_77_length_11193_cov_18.654708	attc_003	8207	8296	-1	6.9e-06	attC	attC	complete
integron_01	NODE_77_length_11193_cov_18.654708	NODE_77_length_11193_cov_18.654708_11	8291	8788	-1	2.2e-119	protein	trim_DfrA12-NCBIFAM	complete
integron_01	NODE_77_length_11193_cov_18.654708	NODE_77_length_11193_cov_18.654708_12	8933	9946	1	1.3e-25	protein	intI	complete
# cmd: integron_finder --local-max --func-annot R94_S107_Pseudomonas_putida_2_all.fna --cpu 20 --outdir integron_results/R94_S107_Pseudomonas_putida_2_all
ID_integron	ID_replicon	element	pos_beg	pos_end	strand	evalue	type_elt	annotation	type
integron_01	NODE_79_length_26812_cov_4.122766	NODE_79_length_26812_cov_4.122766_22	16910	17923	1	2.6e-25	protein	intI	In0
# cmd: integron_finder --local-max --func-annot R94_S108_Citrobacter_freundii_all.fna --cpu 20 --outdir integron_results/R94_S108_Citrobacter_freundii_all
# No Integron found
# cmd: integron_finder --local-max --func-annot R94_S109_Escherichia_coli_all.fna --cpu 20 --outdir integron_results/R94_S109_Escherichia_coli_all
# No Integron found
# cmd: integron_finder --local-max --func-annot R94_S110_Klebsiella_pneumoniae_all.fna --cpu 20 --outdir integron_results/R94_S110_Klebsiella_pneumoniae_all
ID_integron	ID_replicon	element	pos_beg	pos_end	strand	evalue	type_elt	annotation	type
integron_01	NODE_425_length_3929_cov_2.917412	NODE_425_length_3929_cov_2.917412_2	1018	2049	1	NA	protein	protein	CALIN
integron_01	NODE_425_length_3929_cov_2.917412	attc_001	1263	1379	1	0.46	attC	attC	CALIN
integron_01	NODE_425_length_3929_cov_2.917412	NODE_425_length_3929_cov_2.917412_3	2042	2695	1	NA	protein	protein	CALIN
integron_01	NODE_425_length_3929_cov_2.917412	attc_002	2732	2853	1	0.084	attC	attC	CALIN
integron_01	NODE_425_length_3929_cov_2.917412	NODE_425_length_3929_cov_2.917412_4	2739	3554	1	NA	protein	protein	CALIN
integron_01	NODE_521_length_2492_cov_5.468076	NODE_521_length_2492_cov_5.468076_1	309	1322	-1	2.7e-26	protein	intI	complete
integron_01	NODE_521_length_2492_cov_5.468076	NODE_521_length_2492_cov_5.468076_2	1469	1951	1	4.5e-94	protein	trim_DfrA1_like-NCBIFAM	complete
integron_01	NODE_521_length_2492_cov_5.468076	attc_001	1946	2031	1	0.0019	attC	attC	complete
integron_01	NODE_521_length_2492_cov_5.468076	NODE_521_length_2492_cov_5.468076_3	2172	2438	1	NA	protein	protein	complete
integron_01	NODE_521_length_2492_cov_5.468076	attc_002	2325	2372	1	0.76	attC	attC	complete
# cmd: integron_finder --local-max --func-annot R94_S111_Escherichia_coli_all.fna --cpu 20 --outdir integron_results/R94_S111_Escherichia_coli_all
ID_integron	ID_replicon	element	pos_beg	pos_end	strand	evalue	type_elt	annotation	type
integron_01	NODE_29_length_48459_cov_4.639040	NODE_29_length_48459_cov_4.639040_36	39071	39568	-1	NA	protein	protein	complete
integron_01	NODE_29_length_48459_cov_4.639040	attc_001	39583	39642	-1	3.8e-08	attC	attC	complete
integron_01	NODE_29_length_48459_cov_4.639040	NODE_29_length_48459_cov_4.639040_37	39644	40420	-1	5.8e-181	protein	ANT_3pp_AadA1-NCBIFAM	complete
integron_01	NODE_29_length_48459_cov_4.639040	attc_002	40436	40525	-1	0.00025	attC	attC	complete
integron_01	NODE_29_length_48459_cov_4.639040	NODE_29_length_48459_cov_4.639040_38	40545	41420	-1	1.2e-197	protein	blaOXA-1_like-NCBIFAM	complete
integron_01	NODE_29_length_48459_cov_4.639040	NODE_29_length_48459_cov_4.639040_39	41585	42598	1	4e-25	protein	intI	complete
integron_01	NODE_181_length_3591_cov_3.753176	NODE_181_length_3591_cov_3.753176_5	2304	2777	1	3.7e-95	protein	trim_DfrA1_like-NCBIFAM	CALIN
integron_01	NODE_181_length_3591_cov_3.753176	attc_001	2772	2866	1	0.00013	attC	attC	CALIN
integron_01	NODE_181_length_3591_cov_3.753176	NODE_181_length_3591_cov_3.753176_6	2872	3396	1	3.5e-128	protein	sat2-NCBIFAM	CALIN
integron_01	NODE_181_length_3591_cov_3.753176	attc_002	3391	3450	1	1.5e-08	attC	attC	CALIN
integron_01	NODE_181_length_3591_cov_3.753176	NODE_181_length_3591_cov_3.753176_7	3454	3591	1	NA	protein	protein	CALIN
# cmd: integron_finder --local-max --func-annot R94_S112_Escherichia_coli_all.fna --cpu 20 --outdir integron_results/R94_S112_Escherichia_coli_all
ID_integron	ID_replicon	element	pos_beg	pos_end	strand	evalue	type_elt	annotation	type
integron_01	NODE_127_length_10738_cov_3.352559	NODE_127_length_10738_cov_3.352559_10	7254	7601	-1	5.6e-65	protein	SMR_qac_E-NCBIFAM	complete
integron_01	NODE_127_length_10738_cov_3.352559	attc_001	7704	7763	-1	3.4e-10	attC	attC	complete
integron_01	NODE_127_length_10738_cov_3.352559	NODE_127_length_10738_cov_3.352559_11	7765	8544	-1	8.3e-155	protein	ANT_3pp_I-NCBIFAM	complete
integron_01	NODE_127_length_10738_cov_3.352559	attc_002	8560	8619	-1	2.4e-07	attC	attC	complete
integron_01	NODE_127_length_10738_cov_3.352559	attc_003	8880	8969	-1	6.6e-06	attC	attC	complete
integron_01	NODE_127_length_10738_cov_3.352559	NODE_127_length_10738_cov_3.352559_12	8964	9461	-1	2e-119	protein	trim_DfrA12-NCBIFAM	complete
integron_01	NODE_127_length_10738_cov_3.352559	NODE_127_length_10738_cov_3.352559_13	9606	10718	1	1.4e-25	protein	intI	complete
integron_01	NODE_175_length_2581_cov_28.325591	NODE_175_length_2581_cov_28.325591_1	86	832	-1	NA	protein	protein	CALIN
integron_01	NODE_175_length_2581_cov_28.325591	NODE_175_length_2581_cov_28.325591_2	847	2388	-1	NA	protein	protein	CALIN
integron_01	NODE_175_length_2581_cov_28.325591	attc_001	892	934	-1	0.29	attC	attC	CALIN
integron_01	NODE_175_length_2581_cov_28.325591	attc_002	1599	1705	-1	0.026	attC	attC	CALIN
# cmd: integron_finder --local-max --func-annot R94_S113_Escherichia_coli_all.fna --cpu 20 --outdir integron_results/R94_S113_Escherichia_coli_all
ID_integron	ID_replicon	element	pos_beg	pos_end	strand	evalue	type_elt	annotation	type
integron_01	NODE_135_length_4438_cov_3.792855	NODE_135_length_4438_cov_3.792855_3	402	749	-1	3.4e-65	protein	SMR_qac_E-NCBIFAM	complete
integron_01	NODE_135_length_4438_cov_3.792855	attc_001	852	908	-1	6.6e-05	attC	attC	complete
integron_01	NODE_135_length_4438_cov_3.792855	NODE_135_length_4438_cov_3.792855_4	955	1743	-1	1.4e-138	protein	ANT_3pp_I-NCBIFAM	complete
integron_01	NODE_135_length_4438_cov_3.792855	attc_002	1747	1879	-1	5.1e-08	attC	attC	complete
integron_01	NODE_135_length_4438_cov_3.792855	NODE_135_length_4438_cov_3.792855_5	1874	2347	-1	8e-94	protein	trim_DfrA1_like-NCBIFAM	complete
integron_01	NODE_135_length_4438_cov_3.792855	NODE_135_length_4438_cov_3.792855_6	2505	3518	1	7.3e-26	protein	intI	complete
# cmd: integron_finder --local-max --func-annot R94_S114_Pseudomonas_aeruginosa_all.fna --cpu 20 --outdir integron_results/R94_S114_Pseudomonas_aeruginosa_all
ID_integron	ID_replicon	element	pos_beg	pos_end	strand	evalue	type_elt	annotation	type
integron_01	NODE_242_length_9828_cov_3.458406	NODE_242_length_9828_cov_3.458406_1	203	1216	-1	9.1e-26	protein	intI	complete
integron_01	NODE_242_length_9828_cov_3.458406	attc_001	1838	1949	1	1.7e-09	attC	attC	complete
integron_01	NODE_242_length_9828_cov_3.458406	NODE_242_length_9828_cov_3.458406_2	2160	2816	1	1.3e-154	protein	penta_rpt_QnrVC-NCBIFAM	complete
integron_01	NODE_242_length_9828_cov_3.458406	attc_002	2836	2961	1	0.025	attC	attC	complete
integron_01	NODE_242_length_9828_cov_3.458406	NODE_242_length_9828_cov_3.458406_3	3021	3383	1	NA	protein	protein	complete
integron_01	NODE_242_length_9828_cov_3.458406	attc_003	3414	3491	1	0.00093	attC	attC	complete
integron_01	NODE_242_length_9828_cov_3.458406	NODE_242_length_9828_cov_3.458406_4	3522	3974	1	4.9e-70	protein	rifampin_ARR-NCBIFAM	complete
integron_01	NODE_242_length_9828_cov_3.458406	attc_004	3981	4094	1	0.00049	attC	attC	complete
integron_01	NODE_242_length_9828_cov_3.458406	NODE_242_length_9828_cov_3.458406_5	4159	4395	1	8.5e-56	protein	trim_DfrB-NCBIFAM	complete
integron_01	NODE_242_length_9828_cov_3.458406	attc_005	4449	4505	1	8.8e-05	attC	attC	complete
integron_01	NODE_242_length_9828_cov_3.458406	NODE_242_length_9828_cov_3.458406_6	4521	4997	1	2.7e-68	protein	AAC_3_I-NCBIFAM	complete
integron_01	NODE_242_length_9828_cov_3.458406	attc_006	4992	5069	1	6.3e-06	attC	attC	complete
integron_01	NODE_242_length_9828_cov_3.458406	NODE_242_length_9828_cov_3.458406_7	5166	5804	-1	NA	protein	protein	complete
# cmd: integron_finder --local-max --func-annot R94_S116_Escherichia_coli_all.fna --cpu 20 --outdir integron_results/R94_S116_Escherichia_coli_all
# No Integron found
# cmd: integron_finder --local-max --func-annot R94_S117_Citrobacter_werkmanii_all.fna --cpu 20 --outdir integron_results/R94_S117_Citrobacter_werkmanii_all
# No Integron found
# cmd: integron_finder --local-max --func-annot R94_S118_Alcaligenes_spp_all.fna --cpu 20 --outdir integron_results/R94_S118_Alcaligenes_spp_all
ID_integron	ID_replicon	element	pos_beg	pos_end	strand	evalue	type_elt	annotation	type
integron_01	NODE_4_length_190353_cov_7.643303	attc_001	120194	120251	1	0.00043	attC	attC	CALIN
integron_01	NODE_4_length_190353_cov_7.643303	NODE_4_length_190353_cov_7.643303_125	120689	121555	1	NA	protein	protein	CALIN
integron_01	NODE_4_length_190353_cov_7.643303	attc_002	121550	121609	1	5.8e-06	attC	attC	CALIN
integron_01	NODE_4_length_190353_cov_7.643303	NODE_4_length_190353_cov_7.643303_126	121751	122377	-1	NA	protein	protein	CALIN
# cmd: integron_finder --local-max --func-annot R94_S119_Citrobacter_werkmanii_all.fna --cpu 20 --outdir integron_results/R94_S119_Citrobacter_werkmanii_all
# No Integron found
# cmd: integron_finder --local-max --func-annot R94_S120_Proteus_vulgaris_all.fna --cpu 20 --outdir integron_results/R94_S120_Proteus_vulgaris_all
ID_integron	ID_replicon	element	pos_beg	pos_end	strand	evalue	type_elt	annotation	type
integron_01	NODE_1_length_150701_cov_11.814821	attc_001	50481	50540	-1	3.8e-09	attC	attC	complete
integron_01	NODE_1_length_150701_cov_11.814821	NODE_1_length_150701_cov_11.814821_56	50542	51333	-1	2.1e-182	protein	ANT_3pp_AadA1-NCBIFAM	complete
integron_01	NODE_1_length_150701_cov_11.814821	NODE_1_length_150701_cov_11.814821_57	51350	52150	-1	1.1e-190	protein	blaOXA-10_like-NCBIFAM	complete
integron_01	NODE_1_length_150701_cov_11.814821	attc_002	52326	52439	-1	6e-05	attC	attC	complete
integron_01	NODE_1_length_150701_cov_11.814821	NODE_1_length_150701_cov_11.814821_58	52446	53036	-1	2e-68	protein	rifampin_ARR-NCBIFAM	complete
integron_01	NODE_1_length_150701_cov_11.814821	attc_003	52929	53014	-1	0.0087	attC	attC	complete
integron_01	NODE_1_length_150701_cov_11.814821	NODE_1_length_150701_cov_11.814821_59	53009	53491	-1	2.5e-92	protein	trim_DfrA1_like-NCBIFAM	complete
integron_01	NODE_1_length_150701_cov_11.814821	NODE_1_length_150701_cov_11.814821_60	53638	54651	1	1.5e-24	protein	intI	complete
# cmd: integron_finder --local-max --func-annot R94_S121_Proteus_mirabilis_all.fna --cpu 20 --outdir integron_results/R94_S121_Proteus_mirabilis_all
ID_integron	ID_replicon	element	pos_beg	pos_end	strand	evalue	type_elt	annotation	type
integron_01	NODE_7_length_174092_cov_10.442848	NODE_7_length_174092_cov_10.442848_11	8743	9162	-1	NA	protein	protein	CALIN
integron_01	NODE_7_length_174092_cov_10.442848	attc_001	9178	9240	-1	5.5e-07	attC	attC	CALIN
integron_01	NODE_7_length_174092_cov_10.442848	NODE_7_length_174092_cov_10.442848_12	9255	10193	-1	NA	protein	protein	CALIN
integron_01	NODE_7_length_174092_cov_10.442848	attc_002	10063	10161	-1	0.0015	attC	attC	CALIN
integron_01	NODE_7_length_174092_cov_10.442848	NODE_7_length_174092_cov_10.442848_13	10156	10470	-1	NA	protein	protein	CALIN
integron_01	NODE_69_length_3781_cov_9.094143	NODE_69_length_3781_cov_9.094143_1	3	695	1	NA	protein	protein	CALIN
integron_01	NODE_69_length_3781_cov_9.094143	attc_001	814	873	-1	1.2e-10	attC	attC	CALIN
integron_01	NODE_69_length_3781_cov_9.094143	NODE_69_length_3781_cov_9.094143_2	875	1666	-1	2.7e-155	protein	ANT_3pp_I-NCBIFAM	CALIN
integron_01	NODE_69_length_3781_cov_9.094143	attc_002	1670	1726	-1	0.0083	attC	attC	CALIN
integron_01	NODE_69_length_3781_cov_9.094143	NODE_69_length_3781_cov_9.094143_3	1751	2971	-1	2.1e-289	protein	EreA-NCBIFAM	CALIN
integron_01	NODE_69_length_3781_cov_9.094143	attc_003	3037	3169	-1	3.5e-08	attC	attC	CALIN
integron_01	NODE_69_length_3781_cov_9.094143	NODE_69_length_3781_cov_9.094143_4	3164	3781	-1	1.6e-92	protein	trim_DfrA1_like-NCBIFAM	CALIN
integron_01	NODE_90_length_1200_cov_15.996272	NODE_90_length_1200_cov_15.996272_1	2	424	1	NA	protein	protein	CALIN
integron_01	NODE_90_length_1200_cov_15.996272	attc_001	419	490	1	9.5e-10	attC	attC	CALIN
integron_01	NODE_90_length_1200_cov_15.996272	NODE_90_length_1200_cov_15.996272_2	494	1027	1	7.6e-130	protein	ANT_2pp_Ia-NCBIFAM	CALIN
integron_01	NODE_90_length_1200_cov_15.996272	attc_002	1022	1081	1	2.1e-08	attC	attC	CALIN
integron_01	NODE_90_length_1200_cov_15.996272	NODE_90_length_1200_cov_15.996272_3	1096	1200	1	NA	protein	protein	CALIN
# cmd: integron_finder --local-max --func-annot R94_S123_Proteus_mirabilis_all.fna --cpu 20 --outdir integron_results/R94_S123_Proteus_mirabilis_all
ID_integron	ID_replicon	element	pos_beg	pos_end	strand	evalue	type_elt	annotation	type
integron_01	NODE_14_length_103754_cov_12.614743	NODE_14_length_103754_cov_12.614743_92	93305	93619	1	NA	protein	protein	CALIN
integron_01	NODE_14_length_103754_cov_12.614743	NODE_14_length_103754_cov_12.614743_93	93582	94520	1	NA	protein	protein	CALIN
integron_01	NODE_14_length_103754_cov_12.614743	attc_001	93614	93712	1	0.00089	attC	attC	CALIN
integron_01	NODE_14_length_103754_cov_12.614743	attc_002	94535	94597	1	3.3e-07	attC	attC	CALIN
integron_01	NODE_14_length_103754_cov_12.614743	NODE_14_length_103754_cov_12.614743_94	94613	95032	1	NA	protein	protein	CALIN
integron_01	NODE_91_length_1200_cov_22.488350	NODE_91_length_1200_cov_22.488350_1	1	105	-1	NA	protein	protein	CALIN
integron_01	NODE_91_length_1200_cov_22.488350	attc_001	120	179	-1	2.1e-08	attC	attC	CALIN
integron_01	NODE_91_length_1200_cov_22.488350	NODE_91_length_1200_cov_22.488350_2	174	707	-1	7.6e-130	protein	ANT_2pp_Ia-NCBIFAM	CALIN
integron_01	NODE_91_length_1200_cov_22.488350	attc_002	711	782	-1	9.5e-10	attC	attC	CALIN
integron_01	NODE_91_length_1200_cov_22.488350	NODE_91_length_1200_cov_22.488350_3	777	1199	-1	NA	protein	protein	CALIN
# cmd: integron_finder --local-max --func-annot R94_S124_Enterococcus_faecium_all.fna --cpu 20 --outdir integron_results/R94_S124_Enterococcus_faecium_all
# No Integron found
# cmd: integron_finder --local-max --func-annot R94_S125_Aeromonas_caviae_all.fna --cpu 20 --outdir integron_results/R94_S125_Aeromonas_caviae_all
# No Integron found
# cmd: integron_finder --local-max --func-annot R94_S126_Enterococcus_raffinosus_all.fna --cpu 20 --outdir integron_results/R94_S126_Enterococcus_raffinosus_all
# No Integron found
# cmd: integron_finder --local-max --func-annot R94_S127_Enterococcus_faecium_all.fna --cpu 20 --outdir integron_results/R94_S127_Enterococcus_faecium_all
# No Integron found
# cmd: integron_finder --local-max --func-annot R94_S132_Enterococcus_faecium_all.fna --cpu 20 --outdir integron_results/R94_S132_Enterococcus_faecium_all
# No Integron found
# cmd: integron_finder --local-max --func-annot R94_S134_Enterococcus_faecium_all.fna --cpu 20 --outdir integron_results/R94_S134_Enterococcus_faecium_all
# No Integron found
# cmd: integron_finder --local-max --func-annot R94_S135_Enterococcus_faecium_all.fna --cpu 20 --outdir integron_results/R94_S135_Enterococcus_faecium_all
# No Integron found
# cmd: integron_finder --local-max --func-annot R94_S136_Providencia_rettgeri_all.fna --cpu 20 --outdir integron_results/R94_S136_Providencia_rettgeri_all
ID_integron	ID_replicon	element	pos_beg	pos_end	strand	evalue	type_elt	annotation	type
integron_01	NODE_63_length_24623_cov_5.642105	NODE_63_length_24623_cov_5.642105_17	10825	11976	-1	NA	protein	protein	CALIN
integron_01	NODE_63_length_24623_cov_5.642105	attc_001	11847	11890	-1	0.085	attC	attC	CALIN
integron_01	NODE_63_length_24623_cov_5.642105	NODE_63_length_24623_cov_5.642105_18	12016	13050	-1	NA	protein	protein	CALIN
integron_01	NODE_63_length_24623_cov_5.642105	NODE_63_length_24623_cov_5.642105_19	13125	13946	-1	NA	protein	protein	CALIN
integron_01	NODE_63_length_24623_cov_5.642105	NODE_63_length_24623_cov_5.642105_20	13957	15207	-1	NA	protein	protein	CALIN
integron_01	NODE_63_length_24623_cov_5.642105	NODE_63_length_24623_cov_5.642105_21	15252	16700	-1	NA	protein	protein	CALIN
integron_01	NODE_63_length_24623_cov_5.642105	attc_002	15589	15635	-1	0.041	attC	attC	CALIN
integron_01	NODE_66_length_24408_cov_15.364977	NODE_66_length_24408_cov_15.364977_17	18972	19361	-1	NA	protein	protein	complete
integron_01	NODE_66_length_24408_cov_15.364977	attc_001	19464	19523	-1	6.1e-10	attC	attC	complete
integron_01	NODE_66_length_24408_cov_15.364977	NODE_66_length_24408_cov_15.364977_18	19525	20340	-1	3.3e-183	protein	ANT_3pp_AadA1-NCBIFAM	complete
integron_01	NODE_66_length_24408_cov_15.364977	NODE_66_length_24408_cov_15.364977_19	20333	21133	-1	1.6e-191	protein	blaOXA-10_like-NCBIFAM	complete
integron_01	NODE_66_length_24408_cov_15.364977	attc_002	21309	21422	-1	9.6e-06	attC	attC	complete
integron_01	NODE_66_length_24408_cov_15.364977	NODE_66_length_24408_cov_15.364977_20	21429	21881	-1	1.1e-69	protein	rifampin_ARR-NCBIFAM	complete
integron_01	NODE_66_length_24408_cov_15.364977	attc_003	21912	21997	-1	0.0014	attC	attC	complete
integron_01	NODE_66_length_24408_cov_15.364977	NODE_66_length_24408_cov_15.364977_21	21992	22465	-1	7.7e-94	protein	trim_DfrA1_like-NCBIFAM	complete
integron_01	NODE_66_length_24408_cov_15.364977	NODE_66_length_24408_cov_15.364977_22	22621	23634	1	2.1e-25	protein	intI	complete
# cmd: integron_finder --local-max --func-annot R94_S137_Morganella_morganii_all.fna --cpu 20 --outdir integron_results/R94_S137_Morganella_morganii_all
# No Integron found
# cmd: integron_finder --local-max --func-annot R94_S138_Klebsiella_pneumoniae_all.fna --cpu 20 --outdir integron_results/R94_S138_Klebsiella_pneumoniae_all
ID_integron	ID_replicon	element	pos_beg	pos_end	strand	evalue	type_elt	annotation	type
integron_01	NODE_137_length_11842_cov_5.982160	NODE_137_length_11842_cov_5.982160_6	5395	6408	-1	1.1e-25	protein	intI	complete
integron_01	NODE_137_length_11842_cov_5.982160	NODE_137_length_11842_cov_5.982160_7	6564	7037	1	4e-94	protein	trim_DfrA1_like-NCBIFAM	complete
integron_01	NODE_137_length_11842_cov_5.982160	attc_001	7032	7117	1	0.0088	attC	attC	complete
integron_01	NODE_137_length_11842_cov_5.982160	NODE_137_length_11842_cov_5.982160_8	7258	7524	1	NA	protein	protein	complete
integron_01	NODE_151_length_10279_cov_2.093381	NODE_151_length_10279_cov_2.093381_5	2327	3793	1	NA	protein	protein	CALIN
integron_01	NODE_151_length_10279_cov_2.093381	attc_001	2825	2894	-1	0.26	attC	attC	CALIN
integron_01	NODE_151_length_10279_cov_2.093381	NODE_151_length_10279_cov_2.093381_6	3879	4838	1	NA	protein	protein	CALIN
integron_01	NODE_151_length_10279_cov_2.093381	attc_002	4463	4514	-1	0.86	attC	attC	CALIN
integron_01	NODE_238_length_2438_cov_4.826915	NODE_238_length_2438_cov_4.826915_1	20	568	-1	NA	protein	protein	CALIN
integron_01	NODE_238_length_2438_cov_4.826915	attc_001	597	686	-1	4.5e-07	attC	attC	CALIN
integron_01	NODE_238_length_2438_cov_4.826915	NODE_238_length_2438_cov_4.826915_2	706	1536	-1	1.4e-199	protein	blaOXA-1_like-NCBIFAM	CALIN
integron_01	NODE_238_length_2438_cov_4.826915	attc_002	1601	1672	-1	2.4e-07	attC	attC	CALIN
integron_01	NODE_238_length_2438_cov_4.826915	NODE_238_length_2438_cov_4.826915_3	1667	2185	-1	1.1e-125	protein	AAC_6p_Ib-NCBIFAM	CALIN
# cmd: integron_finder --local-max --func-annot R94_S139_Escherichia_coli_all.fna --cpu 20 --outdir integron_results/R94_S139_Escherichia_coli_all
ID_integron	ID_replicon	element	pos_beg	pos_end	strand	evalue	type_elt	annotation	type
integron_01	NODE_106_length_8920_cov_4.249289	NODE_106_length_8920_cov_4.249289_9	6581	6928	-1	4.7e-65	protein	SMR_qac_E-NCBIFAM	CALIN
integron_01	NODE_106_length_8920_cov_4.249289	attc_001	7031	7090	-1	2.8e-10	attC	attC	CALIN
integron_01	NODE_106_length_8920_cov_4.249289	NODE_106_length_8920_cov_4.249289_10	7092	7871	-1	7e-155	protein	ANT_3pp_I-NCBIFAM	CALIN
integron_01	NODE_106_length_8920_cov_4.249289	attc_002	7887	7946	-1	2e-07	attC	attC	CALIN
integron_01	NODE_106_length_8920_cov_4.249289	attc_003	8207	8296	-1	5.5e-06	attC	attC	CALIN
integron_01	NODE_106_length_8920_cov_4.249289	NODE_106_length_8920_cov_4.249289_11	8291	8788	-1	1.7e-119	protein	trim_DfrA12-NCBIFAM	CALIN
integron_01	NODE_128_length_4989_cov_4.860757	NODE_128_length_4989_cov_4.860757_2	1017	1313	1	NA	protein	protein	CALIN
integron_01	NODE_128_length_4989_cov_4.860757	attc_001	1334	1376	1	0.22	attC	attC	CALIN
integron_01	NODE_128_length_4989_cov_4.860757	NODE_128_length_4989_cov_4.860757_3	1454	2995	1	NA	protein	protein	CALIN
integron_01	NODE_128_length_4989_cov_4.860757	attc_002	2137	2243	1	0.05	attC	attC	CALIN
integron_01	NODE_128_length_4989_cov_4.860757	attc_003	2908	2950	1	0.57	attC	attC	CALIN
integron_01	NODE_128_length_4989_cov_4.860757	NODE_128_length_4989_cov_4.860757_4	3010	3756	1	NA	protein	protein	CALIN
# cmd: integron_finder --local-max --func-annot R94_S140_Citrobacter_werkmanii_all.fna --cpu 20 --outdir integron_results/R94_S140_Citrobacter_werkmanii_all
# No Integron found
# cmd: integron_finder --local-max --func-annot R94_S141_Pseudomonas_aeruginosa_all.fna --cpu 20 --outdir integron_results/R94_S141_Pseudomonas_aeruginosa_all
ID_integron	ID_replicon	element	pos_beg	pos_end	strand	evalue	type_elt	annotation	type
integron_01	NODE_154_length_13192_cov_3.533639	NODE_154_length_13192_cov_3.533639_13	12353	13192	-1	8.8e-26	protein	intI	In0
integron_01	NODE_248_length_3135_cov_2.106715	NODE_248_length_3135_cov_2.106715_1	1	504	1	NA	protein	protein	CALIN
integron_01	NODE_248_length_3135_cov_2.106715	attc_001	524	613	1	5.7e-07	attC	attC	CALIN
integron_01	NODE_248_length_3135_cov_2.106715	NODE_248_length_3135_cov_2.106715_2	629	1408	1	1.9e-155	protein	ANT_3pp_I-NCBIFAM	CALIN
integron_01	NODE_248_length_3135_cov_2.106715	attc_002	1410	1469	1	3e-09	attC	attC	CALIN
integron_01	NODE_248_length_3135_cov_2.106715	NODE_248_length_3135_cov_2.106715_3	1670	2929	1	1e-289	protein	efflux_CmlA-NCBIFAM	CALIN
integron_01	NODE_248_length_3135_cov_2.106715	attc_003	2949	3018	1	3.2e-08	attC	attC	CALIN
integron_01	NODE_249_length_3069_cov_2.748810	NODE_249_length_3069_cov_2.748810_2	912	1955	-1	NA	protein	protein	CALIN
integron_01	NODE_249_length_3069_cov_2.748810	attc_001	2015	2074	1	0.023	attC	attC	CALIN
integron_01	NODE_249_length_3069_cov_2.748810	NODE_249_length_3069_cov_2.748810_3	2090	2917	1	4.7e-199	protein	blaOXA-2_like-NCBIFAM	CALIN
integron_01	NODE_249_length_3069_cov_2.748810	attc_002	2881	2950	1	3e-05	attC	attC	CALIN
# cmd: integron_finder --local-max --func-annot R94_S142_Escherichia_coli_all.fna --cpu 20 --outdir integron_results/R94_S142_Escherichia_coli_all
ID_integron	ID_replicon	element	pos_beg	pos_end	strand	evalue	type_elt	annotation	type
integron_01	NODE_126_length_8920_cov_5.836120	NODE_126_length_8920_cov_5.836120_9	6581	6928	-1	4.7e-65	protein	SMR_qac_E-NCBIFAM	CALIN
integron_01	NODE_126_length_8920_cov_5.836120	attc_001	7031	7090	-1	2.8e-10	attC	attC	CALIN
integron_01	NODE_126_length_8920_cov_5.836120	NODE_126_length_8920_cov_5.836120_10	7092	7871	-1	7e-155	protein	ANT_3pp_I-NCBIFAM	CALIN
integron_01	NODE_126_length_8920_cov_5.836120	attc_002	7887	7946	-1	2e-07	attC	attC	CALIN
integron_01	NODE_126_length_8920_cov_5.836120	attc_003	8207	8296	-1	5.5e-06	attC	attC	CALIN
integron_01	NODE_126_length_8920_cov_5.836120	NODE_126_length_8920_cov_5.836120_11	8291	8788	-1	1.7e-119	protein	trim_DfrA12-NCBIFAM	CALIN
integron_01	NODE_159_length_3973_cov_7.271451	NODE_159_length_3973_cov_7.271451_2	1023	1319	1	NA	protein	protein	CALIN
integron_01	NODE_159_length_3973_cov_7.271451	attc_001	1340	1382	1	0.18	attC	attC	CALIN
integron_01	NODE_159_length_3973_cov_7.271451	NODE_159_length_3973_cov_7.271451_3	1460	3001	1	NA	protein	protein	CALIN
integron_01	NODE_159_length_3973_cov_7.271451	attc_002	2143	2249	1	0.039	attC	attC	CALIN
integron_01	NODE_159_length_3973_cov_7.271451	attc_003	2914	2956	1	0.45	attC	attC	CALIN
integron_01	NODE_159_length_3973_cov_7.271451	NODE_159_length_3973_cov_7.271451_4	3016	3762	1	NA	protein	protein	CALIN
# cmd: integron_finder --local-max --func-annot R94_S143_Escherichia_coli_all.fna --cpu 20 --outdir integron_results/R94_S143_Escherichia_coli_all
ID_integron	ID_replicon	element	pos_beg	pos_end	strand	evalue	type_elt	annotation	type
integron_01	NODE_104_length_10469_cov_7.281764	NODE_104_length_10469_cov_7.281764_6	3134	3481	-1	5.1e-65	protein	SMR_qac_E-NCBIFAM	CALIN
integron_01	NODE_104_length_10469_cov_7.281764	attc_001	3584	3643	-1	3.3e-10	attC	attC	CALIN
integron_01	NODE_104_length_10469_cov_7.281764	NODE_104_length_10469_cov_7.281764_7	3645	4424	-1	7.7e-155	protein	ANT_3pp_I-NCBIFAM	CALIN
integron_01	NODE_104_length_10469_cov_7.281764	attc_002	4440	4499	-1	2.3e-07	attC	attC	CALIN
integron_01	NODE_104_length_10469_cov_7.281764	attc_003	4760	4849	-1	6.4e-06	attC	attC	CALIN
integron_01	NODE_104_length_10469_cov_7.281764	NODE_104_length_10469_cov_7.281764_8	4844	5341	-1	1.9e-119	protein	trim_DfrA12-NCBIFAM	CALIN
integron_01	NODE_129_length_6383_cov_7.617807	NODE_129_length_6383_cov_7.617807_6	5641	6381	-1	3.3e-26	protein	intI	In0
# cmd: integron_finder --local-max --func-annot R94_S144_Klebsiella_pneumoniae_all.fna --cpu 20 --outdir integron_results/R94_S144_Klebsiella_pneumoniae_all
ID_integron	ID_replicon	element	pos_beg	pos_end	strand	evalue	type_elt	annotation	type
integron_01	NODE_72_length_10617_cov_12.125739	NODE_72_length_10617_cov_12.125739_5	3221	4234	-1	1.2e-25	protein	intI	complete
integron_01	NODE_72_length_10617_cov_12.125739	NODE_72_length_10617_cov_12.125739_6	4407	4859	1	6.3e-70	protein	rifampin_ARR-NCBIFAM	complete
integron_01	NODE_72_length_10617_cov_12.125739	attc_001	4866	4979	1	0.0007	attC	attC	complete
integron_01	NODE_72_length_10617_cov_12.125739	NODE_72_length_10617_cov_12.125739_7	5135	6361	1	1.1e-277	protein	EreA-NCBIFAM	complete
integron_01	NODE_72_length_10617_cov_12.125739	attc_002	6387	6443	1	0.0032	attC	attC	complete
integron_01	NODE_72_length_10617_cov_12.125739	NODE_72_length_10617_cov_12.125739_8	6459	7238	1	1.6e-183	protein	ANT_3pp_AadA1-NCBIFAM	complete
integron_01	NODE_72_length_10617_cov_12.125739	NODE_72_length_10617_cov_12.125739_9	7460	8719	1	3.9e-290	protein	efflux_CmlA-NCBIFAM	complete
integron_01	NODE_72_length_10617_cov_12.125739	attc_003	8739	8808	1	1.1e-07	attC	attC	complete
integron_01	NODE_72_length_10617_cov_12.125739	NODE_72_length_10617_cov_12.125739_10	8911	9258	1	5.6e-65	protein	SMR_qac_E-NCBIFAM	complete
# cmd: integron_finder --local-max --func-annot R94_S145_Escherichia_coli_all.fna --cpu 20 --outdir integron_results/R94_S145_Escherichia_coli_all
# No Integron found
# cmd: integron_finder --local-max --func-annot R94_S146_Klebsiella_pneumoniae_all.fna --cpu 20 --outdir integron_results/R94_S146_Klebsiella_pneumoniae_all
ID_integron	ID_replicon	element	pos_beg	pos_end	strand	evalue	type_elt	annotation	type
integron_01	NODE_104_length_9209_cov_8.442854	NODE_104_length_9209_cov_8.442854_3	2177	3337	1	NA	protein	protein	CALIN
integron_01	NODE_104_length_9209_cov_8.442854	attc_001	3256	3339	-1	0.057	attC	attC	CALIN
integron_01	NODE_104_length_9209_cov_8.442854	NODE_104_length_9209_cov_8.442854_4	3460	3726	1	NA	protein	protein	CALIN
integron_01	NODE_104_length_9209_cov_8.442854	attc_002	3612	3806	-1	0.085	attC	attC	CALIN
integron_01	NODE_104_length_9209_cov_8.442854	NODE_104_length_9209_cov_8.442854_5	3714	4199	1	NA	protein	protein	CALIN
integron_01	NODE_146_length_3612_cov_12.760976	NODE_146_length_3612_cov_12.760976_3	1273	1620	-1	2.1e-65	protein	SMR_qac_E-NCBIFAM	CALIN
integron_01	NODE_146_length_3612_cov_12.760976	attc_001	1723	1782	-1	1.2e-10	attC	attC	CALIN
integron_01	NODE_146_length_3612_cov_12.760976	NODE_146_length_3612_cov_12.760976_4	1784	2563	-1	7.3e-155	protein	ANT_3pp_I-NCBIFAM	CALIN
integron_01	NODE_146_length_3612_cov_12.760976	attc_002	2579	2638	-1	8e-08	attC	attC	CALIN
integron_01	NODE_146_length_3612_cov_12.760976	attc_003	2899	2988	-1	2.2e-06	attC	attC	CALIN
integron_01	NODE_146_length_3612_cov_12.760976	NODE_146_length_3612_cov_12.760976_5	2983	3480	-1	7.8e-120	protein	trim_DfrA12-NCBIFAM	CALIN
integron_01	NODE_156_length_2967_cov_9.973239	NODE_156_length_2967_cov_9.973239_1	2	193	-1	NA	protein	protein	CALIN
integron_01	NODE_156_length_2967_cov_9.973239	attc_001	364	434	-1	0.00019	attC	attC	CALIN
integron_01	NODE_156_length_2967_cov_9.973239	NODE_156_length_2967_cov_9.973239_2	459	818	-1	NA	protein	protein	CALIN
integron_01	NODE_156_length_2967_cov_9.973239	NODE_156_length_2967_cov_9.973239_3	948	1283	-1	NA	protein	protein	CALIN
integron_01	NODE_156_length_2967_cov_9.973239	NODE_156_length_2967_cov_9.973239_4	1343	2119	-1	6.6e-182	protein	ANT_3pp_AadA1-NCBIFAM	CALIN
integron_01	NODE_156_length_2967_cov_9.973239	attc_002	2135	2206	-1	4.3e-07	attC	attC	CALIN
integron_01	NODE_156_length_2967_cov_9.973239	NODE_156_length_2967_cov_9.973239_5	2201	2806	-1	6.8e-134	protein	AAC_6p_Ib-NCBIFAM	CALIN
integron_01	NODE_159_length_2779_cov_9.105204	attc_001	101	159	-1	0.012	attC	attC	CALIN
integron_01	NODE_159_length_2779_cov_9.105204	NODE_159_length_2779_cov_9.105204_1	183	1409	-1	4.4e-291	protein	EreA-NCBIFAM	CALIN
integron_01	NODE_159_length_2779_cov_9.105204	attc_002	1479	1565	-1	0.00013	attC	attC	CALIN
integron_01	NODE_159_length_2779_cov_9.105204	NODE_159_length_2779_cov_9.105204_2	1560	2033	-1	9.7e-95	protein	trim_DfrA1_like-NCBIFAM	CALIN
integron_01	NODE_159_length_2779_cov_9.105204	attc_003	2047	2160	-1	1.9e-06	attC	attC	CALIN
integron_01	NODE_159_length_2779_cov_9.105204	NODE_159_length_2779_cov_9.105204_3	2167	2778	-1	4e-70	protein	rifampin_ARR-NCBIFAM	CALIN
integron_01	NODE_159_length_2779_cov_9.105204	attc_004	2215	2315	-1	0.58	attC	attC	CALIN
# cmd: integron_finder --local-max --func-annot R94_S148_Escherichia_coli_all.fna --cpu 20 --outdir integron_results/R94_S148_Escherichia_coli_all
ID_integron	ID_replicon	element	pos_beg	pos_end	strand	evalue	type_elt	annotation	type
integron_01	NODE_38_length_44180_cov_8.940957	NODE_38_length_44180_cov_8.940957_36	39286	39783	-1	NA	protein	protein	CALIN
integron_01	NODE_38_length_44180_cov_8.940957	attc_001	39798	39857	-1	3.4e-08	attC	attC	CALIN
integron_01	NODE_38_length_44180_cov_8.940957	NODE_38_length_44180_cov_8.940957_37	39859	40647	-1	5.9e-181	protein	ANT_3pp_AadA1-NCBIFAM	CALIN
integron_01	NODE_38_length_44180_cov_8.940957	attc_002	40651	40710	-1	1.9e-07	attC	attC	CALIN
integron_01	NODE_38_length_44180_cov_8.940957	NODE_38_length_44180_cov_8.940957_38	40705	41229	-1	2.1e-127	protein	sat2-NCBIFAM	CALIN
integron_01	NODE_38_length_44180_cov_8.940957	attc_003	41235	41329	-1	0.0016	attC	attC	CALIN
integron_01	NODE_38_length_44180_cov_8.940957	NODE_38_length_44180_cov_8.940957_39	41324	41797	-1	2.2e-94	protein	trim_DfrA1_like-NCBIFAM	CALIN
integron_01	NODE_125_length_3196_cov_15.659824	NODE_125_length_3196_cov_15.659824_1	107	994	-1	3e-26	protein	intI	complete
integron_01	NODE_125_length_3196_cov_15.659824	NODE_125_length_3196_cov_15.659824_2	1139	1636	1	6.2e-120	protein	trim_DfrA12-NCBIFAM	complete
integron_01	NODE_125_length_3196_cov_15.659824	attc_001	1631	1720	1	3.9e-06	attC	attC	complete
integron_01	NODE_125_length_3196_cov_15.659824	attc_002	1981	2040	1	1.4e-07	attC	attC	complete
integron_01	NODE_125_length_3196_cov_15.659824	NODE_125_length_3196_cov_15.659824_3	2056	2835	1	2.6e-155	protein	ANT_3pp_I-NCBIFAM	complete
integron_01	NODE_125_length_3196_cov_15.659824	attc_003	2837	2896	1	2e-10	attC	attC	complete
integron_01	NODE_125_length_3196_cov_15.659824	NODE_125_length_3196_cov_15.659824_4	2999	3196	1	NA	protein	protein	complete
# cmd: integron_finder --local-max --func-annot R94_S149_Klebsiella_pneumoniae_all.fna --cpu 20 --outdir integron_results/R94_S149_Klebsiella_pneumoniae_all
ID_integron	ID_replicon	element	pos_beg	pos_end	strand	evalue	type_elt	annotation	type
integron_01	NODE_44_length_37112_cov_7.465973	NODE_44_length_37112_cov_7.465973_43	30120	31133	-1	4.6e-25	protein	intI	In0
# cmd: integron_finder --local-max --func-annot R94_S150_Klebsiella_quasipneumoniae_all.fna --cpu 20 --outdir integron_results/R94_S150_Klebsiella_quasipneumoniae_all
ID_integron	ID_replicon	element	pos_beg	pos_end	strand	evalue	type_elt	annotation	type
integron_01	NODE_91_length_4209_cov_8.097011	NODE_91_length_4209_cov_8.097011_2	207	1220	-1	5.5e-26	protein	intI	complete
integron_01	NODE_91_length_4209_cov_8.097011	NODE_91_length_4209_cov_8.097011_3	1393	1845	1	2.9e-70	protein	rifampin_ARR-NCBIFAM	complete
integron_01	NODE_91_length_4209_cov_8.097011	attc_001	1697	1797	1	0.88	attC	attC	complete
integron_01	NODE_91_length_4209_cov_8.097011	attc_002	1852	1965	1	2.9e-06	attC	attC	complete
integron_01	NODE_91_length_4209_cov_8.097011	NODE_91_length_4209_cov_8.097011_4	1994	2452	1	6.4e-91	protein	trim_DfrA1_like-NCBIFAM	complete
integron_01	NODE_91_length_4209_cov_8.097011	attc_003	2447	2533	1	0.0002	attC	attC	complete
integron_01	NODE_91_length_4209_cov_8.097011	NODE_91_length_4209_cov_8.097011_5	2603	3829	1	8.9e-291	protein	EreA-NCBIFAM	complete
integron_01	NODE_91_length_4209_cov_8.097011	attc_004	3853	3911	1	0.018	attC	attC	complete
integron_01	NODE_91_length_4209_cov_8.097011	NODE_91_length_4209_cov_8.097011_6	4012	4209	1	NA	protein	protein	complete
integron_01	NODE_114_length_2439_cov_7.610727	NODE_114_length_2439_cov_7.610727_1	255	773	1	1.1e-125	protein	AAC_6p_Ib-NCBIFAM	CALIN
integron_01	NODE_114_length_2439_cov_7.610727	attc_001	768	839	1	2.4e-07	attC	attC	CALIN
integron_01	NODE_114_length_2439_cov_7.610727	NODE_114_length_2439_cov_7.610727_2	904	1734	1	1.4e-199	protein	blaOXA-1_like-NCBIFAM	CALIN
integron_01	NODE_114_length_2439_cov_7.610727	attc_002	1754	1843	1	4.5e-07	attC	attC	CALIN
integron_01	NODE_114_length_2439_cov_7.610727	NODE_114_length_2439_cov_7.610727_3	1872	2420	1	NA	protein	protein	CALIN
integron_01	NODE_3_length_347273_cov_4.208183	NODE_3_length_347273_cov_4.208183_79	90169	92532	1	NA	protein	protein	CALIN
integron_01	NODE_3_length_347273_cov_4.208183	attc_001	91824	91886	1	0.12	attC	attC	CALIN
integron_01	NODE_3_length_347273_cov_4.208183	attc_002	92705	92817	1	0.28	attC	attC	CALIN
integron_01	NODE_3_length_347273_cov_4.208183	NODE_3_length_347273_cov_4.208183_80	92909	94501	-1	NA	protein	protein	CALIN
# cmd: integron_finder --local-max --func-annot R94_S151_Escherichia_coli_all.fna --cpu 20 --outdir integron_results/R94_S151_Escherichia_coli_all
# No Integron found
# cmd: integron_finder --local-max --func-annot R94_S152_Klebsiella_quasipneumoniae_all.fna --cpu 20 --outdir integron_results/R94_S152_Klebsiella_quasipneumoniae_all
ID_integron	ID_replicon	element	pos_beg	pos_end	strand	evalue	type_elt	annotation	type
integron_01	NODE_102_length_2965_cov_13.556378	NODE_102_length_2965_cov_13.556378_1	1	378	1	NA	protein	protein	CALIN
integron_01	NODE_102_length_2965_cov_13.556378	attc_001	373	444	1	4.3e-07	attC	attC	CALIN
integron_01	NODE_102_length_2965_cov_13.556378	NODE_102_length_2965_cov_13.556378_2	460	1236	1	6.6e-182	protein	ANT_3pp_AadA1-NCBIFAM	CALIN
integron_01	NODE_102_length_2965_cov_13.556378	NODE_102_length_2965_cov_13.556378_3	1296	2120	1	5.6e-118	protein	bla_class_D_alt-NCBIFAM	CALIN
integron_01	NODE_102_length_2965_cov_13.556378	attc_002	2145	2215	1	0.00019	attC	attC	CALIN
integron_01	NODE_102_length_2965_cov_13.556378	NODE_102_length_2965_cov_13.556378_4	2386	2637	1	NA	protein	protein	CALIN
integron_01	NODE_105_length_2731_cov_13.873656	NODE_105_length_2731_cov_13.873656_1	2	151	-1	NA	protein	protein	CALIN
integron_01	NODE_105_length_2731_cov_13.873656	attc_001	170	230	-1	8.5e-07	attC	attC	CALIN
integron_01	NODE_105_length_2731_cov_13.873656	NODE_105_length_2731_cov_13.873656_2	770	2125	1	NA	protein	protein	CALIN
integron_01	NODE_105_length_2731_cov_13.873656	attc_002	1857	1970	-1	0.64	attC	attC	CALIN
integron_01	NODE_105_length_2731_cov_13.873656	NODE_105_length_2731_cov_13.873656_3	2206	2457	-1	1.7e-43	protein	rifampin_ARR-NCBIFAM	CALIN
integron_01	NODE_105_length_2731_cov_13.873656	attc_003	2254	2354	-1	0.57	attC	attC	CALIN
integron_01	NODE_119_length_2090_cov_10.420275	NODE_119_length_2090_cov_10.420275_1	2	424	1	NA	protein	protein	CALIN
integron_01	NODE_119_length_2090_cov_10.420275	attc_001	419	490	1	2.1e-07	attC	attC	CALIN
integron_01	NODE_119_length_2090_cov_10.420275	NODE_119_length_2090_cov_10.420275_2	555	1385	1	1.4e-199	protein	blaOXA-1_like-NCBIFAM	CALIN
integron_01	NODE_119_length_2090_cov_10.420275	attc_002	1405	1494	1	3.8e-07	attC	attC	CALIN
integron_01	NODE_119_length_2090_cov_10.420275	NODE_119_length_2090_cov_10.420275_3	1523	2071	1	NA	protein	protein	CALIN
integron_01	NODE_1_length_412976_cov_6.110447	NODE_1_length_412976_cov_6.110447_199	232971	235334	1	NA	protein	protein	CALIN
integron_01	NODE_1_length_412976_cov_6.110447	attc_001	234626	234688	1	0.14	attC	attC	CALIN
integron_01	NODE_1_length_412976_cov_6.110447	attc_002	235507	235619	1	0.33	attC	attC	CALIN
integron_01	NODE_1_length_412976_cov_6.110447	NODE_1_length_412976_cov_6.110447_200	235711	237303	-1	NA	protein	protein	CALIN
# cmd: integron_finder --local-max --func-annot R94_S153_Escherichia_coli_all.fna --cpu 20 --outdir integron_results/R94_S153_Escherichia_coli_all
ID_integron	ID_replicon	element	pos_beg	pos_end	strand	evalue	type_elt	annotation	type
integron_01	NODE_8_length_120872_cov_5.230593	NODE_8_length_120872_cov_5.230593_3	793	1212	-1	NA	protein	protein	CALIN
integron_01	NODE_8_length_120872_cov_5.230593	attc_001	1227	1286	-1	9.4e-08	attC	attC	CALIN
integron_01	NODE_8_length_120872_cov_5.230593	NODE_8_length_120872_cov_5.230593_4	1288	2076	-1	1.8e-180	protein	ANT_3pp_AadA1-NCBIFAM	CALIN
integron_01	NODE_8_length_120872_cov_5.230593	attc_002	2080	2139	-1	5.1e-07	attC	attC	CALIN
integron_01	NODE_8_length_120872_cov_5.230593	NODE_8_length_120872_cov_5.230593_5	2409	2885	-1	NA	protein	protein	CALIN
integron_01	NODE_8_length_120872_cov_5.230593	attc_003	2891	2985	-1	0.0045	attC	attC	CALIN
integron_01	NODE_8_length_120872_cov_5.230593	NODE_8_length_120872_cov_5.230593_6	2980	3453	-1	6.6e-94	protein	trim_DfrA1_like-NCBIFAM	CALIN
integron_01	NODE_116_length_6251_cov_9.303070	NODE_116_length_6251_cov_9.303070_1	20	466	-1	2.4e-11	protein	intI	complete
integron_01	NODE_116_length_6251_cov_9.303070	NODE_116_length_6251_cov_9.303070_2	457	807	-1	NA	protein	protein	complete
integron_01	NODE_116_length_6251_cov_9.303070	NODE_116_length_6251_cov_9.303070_3	963	1436	1	2.7e-94	protein	trim_DfrA1_like-NCBIFAM	complete
integron_01	NODE_116_length_6251_cov_9.303070	attc_001	1431	1516	1	0.0047	attC	attC	complete
integron_01	NODE_116_length_6251_cov_9.303070	NODE_116_length_6251_cov_9.303070_4	1657	1923	1	NA	protein	protein	complete
integron_01	NODE_155_length_2584_cov_71.418396	NODE_155_length_2584_cov_71.418396_1	89	835	-1	NA	protein	protein	CALIN
integron_01	NODE_155_length_2584_cov_71.418396	NODE_155_length_2584_cov_71.418396_2	850	2391	-1	NA	protein	protein	CALIN
integron_01	NODE_155_length_2584_cov_71.418396	attc_001	895	937	-1	0.29	attC	attC	CALIN
integron_01	NODE_155_length_2584_cov_71.418396	attc_002	1602	1708	-1	0.026	attC	attC	CALIN
# cmd: integron_finder --local-max --func-annot R94_S155_Alcaligenes_spp_all.fna --cpu 20 --outdir integron_results/R94_S155_Alcaligenes_spp_all
ID_integron	ID_replicon	element	pos_beg	pos_end	strand	evalue	type_elt	annotation	type
integron_01	NODE_17_length_82170_cov_8.719367	NODE_17_length_82170_cov_8.719367_56	67983	68609	1	NA	protein	protein	CALIN
integron_01	NODE_17_length_82170_cov_8.719367	attc_001	68751	68810	-1	2.5e-06	attC	attC	CALIN
integron_01	NODE_17_length_82170_cov_8.719367	NODE_17_length_82170_cov_8.719367_57	68805	69671	-1	NA	protein	protein	CALIN
integron_01	NODE_17_length_82170_cov_8.719367	attc_002	69682	69739	-1	0.73	attC	attC	CALIN
integron_01	NODE_17_length_82170_cov_8.719367	attc_003	70109	70166	-1	0.00018	attC	attC	CALIN
# cmd: integron_finder --local-max --func-annot R94_S156_Citrobacter_werkmanii_all.fna --cpu 20 --outdir integron_results/R94_S156_Citrobacter_werkmanii_all
# No Integron found
# cmd: integron_finder --local-max --func-annot R94_S158_Aeromonas_caviae_all.fna --cpu 20 --outdir integron_results/R94_S158_Aeromonas_caviae_all
ID_integron	ID_replicon	element	pos_beg	pos_end	strand	evalue	type_elt	annotation	type
integron_01	NODE_8_length_92275_cov_5.355244	NODE_8_length_92275_cov_5.355244_32	27859	29064	1	NA	protein	protein	CALIN
integron_01	NODE_8_length_92275_cov_5.355244	attc_001	29096	29222	1	0.0011	attC	attC	CALIN
integron_01	NODE_8_length_92275_cov_5.355244	NODE_8_length_92275_cov_5.355244_33	29257	30330	1	NA	protein	protein	CALIN
integron_01	NODE_8_length_92275_cov_5.355244	attc_002	30325	30372	1	0.00016	attC	attC	CALIN
# cmd: integron_finder --local-max --func-annot R94_S159_Escherichia_coli_all.fna --cpu 20 --outdir integron_results/R94_S159_Escherichia_coli_all
# No Integron found
# cmd: integron_finder --local-max --func-annot R94_S160_Klebsiella_quasipneumoniae_all.fna --cpu 20 --outdir integron_results/R94_S160_Klebsiella_quasipneumoniae_all
ID_integron	ID_replicon	element	pos_beg	pos_end	strand	evalue	type_elt	annotation	type
integron_01	NODE_137_length_4210_cov_6.534901	NODE_137_length_4210_cov_6.534901_1	1	198	-1	NA	protein	protein	complete
integron_01	NODE_137_length_4210_cov_6.534901	attc_001	299	357	-1	0.018	attC	attC	complete
integron_01	NODE_137_length_4210_cov_6.534901	NODE_137_length_4210_cov_6.534901_2	381	1607	-1	8.9e-291	protein	EreA-NCBIFAM	complete
integron_01	NODE_137_length_4210_cov_6.534901	attc_002	1677	1763	-1	0.0002	attC	attC	complete
integron_01	NODE_137_length_4210_cov_6.534901	NODE_137_length_4210_cov_6.534901_3	1758	2216	-1	6.4e-91	protein	trim_DfrA1_like-NCBIFAM	complete
integron_01	NODE_137_length_4210_cov_6.534901	attc_003	2245	2358	-1	2.9e-06	attC	attC	complete
integron_01	NODE_137_length_4210_cov_6.534901	NODE_137_length_4210_cov_6.534901_4	2365	2817	-1	2.9e-70	protein	rifampin_ARR-NCBIFAM	complete
integron_01	NODE_137_length_4210_cov_6.534901	attc_004	2413	2513	-1	0.88	attC	attC	complete
integron_01	NODE_137_length_4210_cov_6.534901	NODE_137_length_4210_cov_6.534901_5	2990	4003	1	5.5e-26	protein	intI	complete
# cmd: integron_finder --local-max --func-annot R94_S161_Escherichia_coli_all.fna --cpu 20 --outdir integron_results/R94_S161_Escherichia_coli_all
# No Integron found
# cmd: integron_finder --local-max --func-annot R94_S162_Escherichia_coli_all.fna --cpu 20 --outdir integron_results/R94_S162_Escherichia_coli_all
# No Integron found
# cmd: integron_finder --local-max --func-annot R94_S163_Escherichia_coli_all.fna --cpu 20 --outdir integron_results/R94_S163_Escherichia_coli_all
# No Integron found
# cmd: integron_finder --local-max --func-annot R94_S164_Citrobacter_freundii_all.fna --cpu 20 --outdir integron_results/R94_S164_Citrobacter_freundii_all
# No Integron found
# cmd: integron_finder --local-max --func-annot R94_S165_Escherichia_coli_all.fna --cpu 20 --outdir integron_results/R94_S165_Escherichia_coli_all
ID_integron	ID_replicon	element	pos_beg	pos_end	strand	evalue	type_elt	annotation	type
integron_01	NODE_104_length_2581_cov_39.487368	NODE_104_length_2581_cov_39.487368_1	86	832	-1	NA	protein	protein	CALIN
integron_01	NODE_104_length_2581_cov_39.487368	NODE_104_length_2581_cov_39.487368_2	847	2388	-1	NA	protein	protein	CALIN
integron_01	NODE_104_length_2581_cov_39.487368	attc_001	892	934	-1	0.29	attC	attC	CALIN
integron_01	NODE_104_length_2581_cov_39.487368	attc_002	1599	1705	-1	0.026	attC	attC	CALIN
integron_01	NODE_105_length_2551_cov_10.189769	NODE_105_length_2551_cov_10.189769_2	110	808	-1	3.7e-11	protein	intI	complete
integron_01	NODE_105_length_2551_cov_10.189769	NODE_105_length_2551_cov_10.189769_3	840	1439	1	3.7e-93	protein	trim_DfrA1_like-NCBIFAM	complete
integron_01	NODE_105_length_2551_cov_10.189769	attc_001	1434	1566	1	5.9e-08	attC	attC	complete
integron_01	NODE_105_length_2551_cov_10.189769	NODE_105_length_2551_cov_10.189769_4	1570	2358	1	6.9e-139	protein	ANT_3pp_I-NCBIFAM	complete
integron_01	NODE_105_length_2551_cov_10.189769	attc_002	2405	2461	1	7.6e-05	attC	attC	complete
# cmd: integron_finder --local-max --func-annot R94_S166_Acinetobacter_baumannii_all.fna --cpu 20 --outdir integron_results/R94_S166_Acinetobacter_baumannii_all
# No Integron found
# cmd: integron_finder --local-max --func-annot R94_S167_Klebsiella_pneumoniae_all.fna --cpu 20 --outdir integron_results/R94_S167_Klebsiella_pneumoniae_all
ID_integron	ID_replicon	element	pos_beg	pos_end	strand	evalue	type_elt	annotation	type
integron_01	NODE_172_length_2491_cov_7.329949	NODE_172_length_2491_cov_7.329949_1	2	424	1	NA	protein	protein	CALIN
integron_01	NODE_172_length_2491_cov_7.329949	attc_001	419	490	1	3.6e-07	attC	attC	CALIN
integron_01	NODE_172_length_2491_cov_7.329949	NODE_172_length_2491_cov_7.329949_2	494	1282	1	5.6e-182	protein	ANT_3pp_AadA1-NCBIFAM	CALIN
integron_01	NODE_172_length_2491_cov_7.329949	NODE_172_length_2491_cov_7.329949_3	1327	1677	1	NA	protein	protein	CALIN
integron_01	NODE_172_length_2491_cov_7.329949	NODE_172_length_2491_cov_7.329949_4	1807	2166	1	NA	protein	protein	CALIN
integron_01	NODE_172_length_2491_cov_7.329949	attc_002	2191	2261	1	0.00016	attC	attC	CALIN
# cmd: integron_finder --local-max --func-annot R94_S168_Escherichia_coli_all.fna --cpu 20 --outdir integron_results/R94_S168_Escherichia_coli_all
# No Integron found
# cmd: integron_finder --local-max --func-annot R94_S169_Pseudomonas_putida_all.fna --cpu 20 --outdir integron_results/R94_S169_Pseudomonas_putida_all
ID_integron	ID_replicon	element	pos_beg	pos_end	strand	evalue	type_elt	annotation	type
integron_01	NODE_126_length_4251_cov_5.507032	NODE_126_length_4251_cov_5.507032_3	2314	2646	-1	1.1e-71	protein	SMR_qac_FL-NCBIFAM	CALIN
integron_01	NODE_126_length_4251_cov_5.507032	attc_001	2755	2810	-1	4.3e-08	attC	attC	CALIN
integron_01	NODE_126_length_4251_cov_5.507032	NODE_126_length_4251_cov_5.507032_4	2765	3520	-1	4.5e-184	protein	blaDIM-NCBIFAM	CALIN
integron_01	NODE_126_length_4251_cov_5.507032	attc_002	3532	3591	-1	2.5e-07	attC	attC	CALIN
integron_01	NODE_126_length_4251_cov_5.507032	NODE_126_length_4251_cov_5.507032_5	3586	4251	-1	2.9e-129	protein	ANT_2pp_Ia-NCBIFAM	CALIN
# cmd: integron_finder --local-max --func-annot R94_S170_Escherichia_coli_all.fna --cpu 20 --outdir integron_results/R94_S170_Escherichia_coli_all
ID_integron	ID_replicon	element	pos_beg	pos_end	strand	evalue	type_elt	annotation	type
integron_01	NODE_80_length_8918_cov_5.158571	NODE_80_length_8918_cov_5.158571_1	133	630	1	1.7e-119	protein	trim_DfrA12-NCBIFAM	CALIN
integron_01	NODE_80_length_8918_cov_5.158571	attc_001	625	714	1	5.5e-06	attC	attC	CALIN
integron_01	NODE_80_length_8918_cov_5.158571	attc_002	975	1034	1	2e-07	attC	attC	CALIN
integron_01	NODE_80_length_8918_cov_5.158571	NODE_80_length_8918_cov_5.158571_2	1050	1829	1	7e-155	protein	ANT_3pp_I-NCBIFAM	CALIN
integron_01	NODE_80_length_8918_cov_5.158571	attc_003	1831	1890	1	2.8e-10	attC	attC	CALIN
integron_01	NODE_80_length_8918_cov_5.158571	NODE_80_length_8918_cov_5.158571_3	1993	2340	1	4.7e-65	protein	SMR_qac_E-NCBIFAM	CALIN
integron_01	NODE_99_length_3792_cov_7.730696	NODE_99_length_3792_cov_7.730696_3	1170	1916	-1	NA	protein	protein	CALIN
integron_01	NODE_99_length_3792_cov_7.730696	NODE_99_length_3792_cov_7.730696_4	1931	3472	-1	NA	protein	protein	CALIN
integron_01	NODE_99_length_3792_cov_7.730696	attc_001	1976	2018	-1	0.43	attC	attC	CALIN
integron_01	NODE_99_length_3792_cov_7.730696	attc_002	2683	2789	-1	0.038	attC	attC	CALIN
integron_01	NODE_99_length_3792_cov_7.730696	attc_003	3550	3592	-1	0.17	attC	attC	CALIN
integron_01	NODE_99_length_3792_cov_7.730696	NODE_99_length_3792_cov_7.730696_5	3613	3792	-1	NA	protein	protein	CALIN
# cmd: integron_finder --local-max --func-annot R94_S171_Escherichia_coli_all.fna --cpu 20 --outdir integron_results/R94_S171_Escherichia_coli_all
ID_integron	ID_replicon	element	pos_beg	pos_end	strand	evalue	type_elt	annotation	type
integron_01	NODE_68_length_9490_cov_9.574175	NODE_68_length_9490_cov_9.574175_2	110	808	-1	7.2e-11	protein	intI	complete
integron_01	NODE_68_length_9490_cov_9.574175	attc_001	1434	1566	1	1.1e-07	attC	attC	complete
integron_01	NODE_68_length_9490_cov_9.574175	NODE_68_length_9490_cov_9.574175_3	1570	2358	1	2.1e-138	protein	ANT_3pp_I-NCBIFAM	complete
integron_01	NODE_68_length_9490_cov_9.574175	attc_002	2405	2461	1	0.00014	attC	attC	complete
integron_01	NODE_68_length_9490_cov_9.574175	NODE_68_length_9490_cov_9.574175_4	2564	2911	1	5.1e-65	protein	SMR_qac_E-NCBIFAM	complete
# cmd: integron_finder --local-max --func-annot R94_S172_Proteus_mirabilis_all.fna --cpu 20 --outdir integron_results/R94_S172_Proteus_mirabilis_all
ID_integron	ID_replicon	element	pos_beg	pos_end	strand	evalue	type_elt	annotation	type
integron_01	NODE_9_length_90887_cov_11.349063	NODE_9_length_90887_cov_11.349063_1	39	1052	1	8.5e-25	protein	intI	In0
integron_02	NODE_9_length_90887_cov_11.349063	NODE_9_length_90887_cov_11.349063_12	9870	10289	-1	NA	protein	protein	CALIN
integron_02	NODE_9_length_90887_cov_11.349063	attc_001	10305	10367	-1	2.9e-07	attC	attC	CALIN
integron_02	NODE_9_length_90887_cov_11.349063	NODE_9_length_90887_cov_11.349063_13	10382	11320	-1	NA	protein	protein	CALIN
integron_02	NODE_9_length_90887_cov_11.349063	attc_002	11190	11288	-1	0.00078	attC	attC	CALIN
integron_02	NODE_9_length_90887_cov_11.349063	NODE_9_length_90887_cov_11.349063_14	11283	11597	-1	NA	protein	protein	CALIN
integron_01	NODE_115_length_3166_cov_12.551168	NODE_115_length_3166_cov_12.551168_1	196	1416	1	1.6e-289	protein	EreA-NCBIFAM	CALIN
integron_01	NODE_115_length_3166_cov_12.551168	attc_001	1441	1497	1	0.007	attC	attC	CALIN
integron_01	NODE_115_length_3166_cov_12.551168	NODE_115_length_3166_cov_12.551168_2	1513	2292	1	1.9e-155	protein	ANT_3pp_I-NCBIFAM	CALIN
integron_01	NODE_115_length_3166_cov_12.551168	attc_002	2294	2353	1	1e-10	attC	attC	CALIN
integron_01	NODE_115_length_3166_cov_12.551168	NODE_115_length_3166_cov_12.551168_3	2472	3164	-1	NA	protein	protein	CALIN
integron_01	NODE_128_length_2117_cov_15.133668	NODE_128_length_2117_cov_15.133668_2	736	1341	1	5.4e-134	protein	AAC_6p_Ib-NCBIFAM	CALIN
integron_01	NODE_128_length_2117_cov_15.133668	attc_001	1336	1407	1	1.7e-09	attC	attC	CALIN
integron_01	NODE_128_length_2117_cov_15.133668	NODE_128_length_2117_cov_15.133668_3	1411	1944	1	1e-129	protein	ANT_2pp_Ia-NCBIFAM	CALIN
integron_01	NODE_128_length_2117_cov_15.133668	attc_002	1939	1998	1	3.6e-08	attC	attC	CALIN
integron_01	NODE_128_length_2117_cov_15.133668	NODE_128_length_2117_cov_15.133668_4	2013	2117	1	NA	protein	protein	CALIN
# cmd: integron_finder --local-max --func-annot R94_S173_Escherichia_coli_all.fna --cpu 20 --outdir integron_results/R94_S173_Escherichia_coli_all
ID_integron	ID_replicon	element	pos_beg	pos_end	strand	evalue	type_elt	annotation	type
integron_01	NODE_78_length_13314_cov_7.048457	NODE_78_length_13314_cov_7.048457_15	10100	11641	-1	NA	protein	protein	CALIN
integron_01	NODE_78_length_13314_cov_7.048457	attc_001	10852	10958	-1	0.13	attC	attC	CALIN
integron_01	NODE_78_length_13314_cov_7.048457	attc_002	11719	11761	-1	0.6	attC	attC	CALIN
integron_01	NODE_78_length_13314_cov_7.048457	NODE_78_length_13314_cov_7.048457_16	11782	12078	-1	NA	protein	protein	CALIN
# cmd: integron_finder --local-max --func-annot R94_S174_Klebsiella_pneumoniae_all.fna --cpu 20 --outdir integron_results/R94_S174_Klebsiella_pneumoniae_all
# No Integron found
# cmd: integron_finder --local-max --func-annot R94_S175_Acinetobacter_baumannii_all.fna --cpu 20 --outdir integron_results/R94_S175_Acinetobacter_baumannii_all
ID_integron	ID_replicon	element	pos_beg	pos_end	strand	evalue	type_elt	annotation	type
integron_01	NODE_57_length_11554_cov_19.283014	NODE_57_length_11554_cov_19.283014_1	114	746	1	1.8e-133	protein	AAC_6p_Ib-NCBIFAM	CALIN
integron_01	NODE_57_length_11554_cov_19.283014	attc_001	741	812	1	5.9e-08	attC	attC	CALIN
integron_01	NODE_57_length_11554_cov_19.283014	NODE_57_length_11554_cov_19.283014_2	839	1471	1	6e-138	protein	chloram_CatB-NCBIFAM	CALIN
integron_01	NODE_57_length_11554_cov_19.283014	attc_002	1466	1525	1	3.6e-09	attC	attC	CALIN
integron_01	NODE_57_length_11554_cov_19.283014	NODE_57_length_11554_cov_19.283014_3	1529	2320	1	1.5e-183	protein	ANT_3pp_AadA1-NCBIFAM	CALIN
integron_01	NODE_57_length_11554_cov_19.283014	attc_003	2322	2381	1	2.9e-10	attC	attC	CALIN
integron_01	NODE_57_length_11554_cov_19.283014	NODE_57_length_11554_cov_19.283014_4	2484	2831	1	5.1e-65	protein	SMR_qac_E-NCBIFAM	CALIN
integron_01	NODE_91_length_3337_cov_17.005919	NODE_91_length_3337_cov_17.005919_1	3	257	-1	NA	protein	protein	complete
integron_01	NODE_91_length_3337_cov_17.005919	attc_001	119	188	-1	6.9e-08	attC	attC	complete
integron_01	NODE_91_length_3337_cov_17.005919	NODE_91_length_3337_cov_17.005919_2	208	1467	-1	1.2e-290	protein	efflux_CmlA-NCBIFAM	complete
integron_01	NODE_91_length_3337_cov_17.005919	attc_002	1668	1781	-1	0.00034	attC	attC	complete
integron_01	NODE_91_length_3337_cov_17.005919	NODE_91_length_3337_cov_17.005919_3	1788	2240	-1	1.9e-70	protein	rifampin_ARR-NCBIFAM	complete
integron_01	NODE_91_length_3337_cov_17.005919	NODE_91_length_3337_cov_17.005919_4	2413	3336	1	3.2e-26	protein	intI	complete
# cmd: integron_finder --local-max --func-annot R94_S176_Escherichia_coli_all.fna --cpu 20 --outdir integron_results/R94_S176_Escherichia_coli_all
ID_integron	ID_replicon	element	pos_beg	pos_end	strand	evalue	type_elt	annotation	type
integron_01	NODE_98_length_9152_cov_6.551801	NODE_98_length_9152_cov_6.551801_9	6579	6926	-1	5.1e-65	protein	SMR_qac_E-NCBIFAM	CALIN
integron_01	NODE_98_length_9152_cov_6.551801	attc_001	7029	7088	-1	2.9e-10	attC	attC	CALIN
integron_01	NODE_98_length_9152_cov_6.551801	NODE_98_length_9152_cov_6.551801_10	7090	7869	-1	7.7e-155	protein	ANT_3pp_I-NCBIFAM	CALIN
integron_01	NODE_98_length_9152_cov_6.551801	attc_002	7885	7944	-1	2e-07	attC	attC	CALIN
integron_01	NODE_98_length_9152_cov_6.551801	attc_003	8205	8294	-1	5.6e-06	attC	attC	CALIN
integron_01	NODE_98_length_9152_cov_6.551801	NODE_98_length_9152_cov_6.551801_11	8289	8786	-1	1.9e-119	protein	trim_DfrA12-NCBIFAM	CALIN
integron_01	NODE_117_length_4739_cov_7.106895	NODE_117_length_4739_cov_7.106895_5	1971	2717	-1	NA	protein	protein	CALIN
integron_01	NODE_117_length_4739_cov_7.106895	NODE_117_length_4739_cov_7.106895_6	2732	4273	-1	NA	protein	protein	CALIN
integron_01	NODE_117_length_4739_cov_7.106895	attc_001	2777	2819	-1	0.54	attC	attC	CALIN
integron_01	NODE_117_length_4739_cov_7.106895	attc_002	3484	3590	-1	0.047	attC	attC	CALIN
integron_01	NODE_117_length_4739_cov_7.106895	attc_003	4351	4393	-1	0.21	attC	attC	CALIN
integron_01	NODE_117_length_4739_cov_7.106895	NODE_117_length_4739_cov_7.106895_7	4414	4710	-1	NA	protein	protein	CALIN
# cmd: integron_finder --local-max --func-annot R94_S177_Alcaligenes_spp_all.fna --cpu 20 --outdir integron_results/R94_S177_Alcaligenes_spp_all
ID_integron	ID_replicon	element	pos_beg	pos_end	strand	evalue	type_elt	annotation	type
integron_01	NODE_16_length_82170_cov_8.788611	attc_001	12008	12065	1	0.00018	attC	attC	CALIN
integron_01	NODE_16_length_82170_cov_8.788611	attc_002	12435	12492	1	0.73	attC	attC	CALIN
integron_01	NODE_16_length_82170_cov_8.788611	NODE_16_length_82170_cov_8.788611_14	12503	13369	1	NA	protein	protein	CALIN
integron_01	NODE_16_length_82170_cov_8.788611	attc_003	13364	13423	1	2.5e-06	attC	attC	CALIN
integron_01	NODE_16_length_82170_cov_8.788611	NODE_16_length_82170_cov_8.788611_15	13565	14191	-1	NA	protein	protein	CALIN
# cmd: integron_finder --local-max --func-annot R94_S178_Escherichia_coli_all.fna --cpu 20 --outdir integron_results/R94_S178_Escherichia_coli_all
# No Integron found
# cmd: integron_finder --local-max --func-annot R94_S179_Escherichia_coli_all.fna --cpu 20 --outdir integron_results/R94_S179_Escherichia_coli_all
# No Integron found
# cmd: integron_finder --local-max --func-annot R94_S180_Escherichia_coli_all.fna --cpu 20 --outdir integron_results/R94_S180_Escherichia_coli_all
ID_integron	ID_replicon	element	pos_beg	pos_end	strand	evalue	type_elt	annotation	type
integron_01	NODE_139_length_5519_cov_8.430082	NODE_139_length_5519_cov_8.430082_3	1219	1965	-1	NA	protein	protein	CALIN
integron_01	NODE_139_length_5519_cov_8.430082	NODE_139_length_5519_cov_8.430082_4	1980	3521	-1	NA	protein	protein	CALIN
integron_01	NODE_139_length_5519_cov_8.430082	attc_001	2025	2067	-1	0.63	attC	attC	CALIN
integron_01	NODE_139_length_5519_cov_8.430082	attc_002	2732	2838	-1	0.055	attC	attC	CALIN
integron_01	NODE_139_length_5519_cov_8.430082	attc_003	3599	3641	-1	0.25	attC	attC	CALIN
integron_01	NODE_139_length_5519_cov_8.430082	NODE_139_length_5519_cov_8.430082_5	3636	3821	-1	NA	protein	protein	CALIN
integron_01	NODE_139_length_5519_cov_8.430082	NODE_139_length_5519_cov_8.430082_6	3837	4520	-1	NA	protein	protein	CALIN
integron_01	NODE_105_length_11066_cov_7.790840	NODE_105_length_11066_cov_7.790840_10	8500	8847	-1	5.6e-65	protein	SMR_qac_E-NCBIFAM	complete
integron_01	NODE_105_length_11066_cov_7.790840	attc_001	8950	9036	-1	0.0023	attC	attC	complete
integron_01	NODE_105_length_11066_cov_7.790840	NODE_105_length_11066_cov_7.790840_11	9031	9504	-1	4.2e-94	protein	trim_DfrA1_like-NCBIFAM	complete
integron_01	NODE_105_length_11066_cov_7.790840	NODE_105_length_11066_cov_7.790840_12	9660	10673	1	1.2e-25	protein	intI	complete
# cmd: integron_finder --local-max --func-annot R94_S181_Escherichia_coli_all.fna --cpu 20 --outdir integron_results/R94_S181_Escherichia_coli_all
ID_integron	ID_replicon	element	pos_beg	pos_end	strand	evalue	type_elt	annotation	type
integron_01	NODE_107_length_4236_cov_10.555366	NODE_107_length_4236_cov_10.555366_2	108	806	-1	4.2e-11	protein	intI	complete
integron_01	NODE_107_length_4236_cov_10.555366	NODE_107_length_4236_cov_10.555366_3	964	1437	1	7e-94	protein	trim_DfrA1_like-NCBIFAM	complete
integron_01	NODE_107_length_4236_cov_10.555366	attc_001	1432	1564	1	4.8e-08	attC	attC	complete
integron_01	NODE_107_length_4236_cov_10.555366	NODE_107_length_4236_cov_10.555366_4	1568	2356	1	1.2e-138	protein	ANT_3pp_I-NCBIFAM	complete
integron_01	NODE_107_length_4236_cov_10.555366	attc_002	2403	2459	1	6.3e-05	attC	attC	complete
integron_01	NODE_107_length_4236_cov_10.555366	NODE_107_length_4236_cov_10.555366_5	2562	2909	1	3e-65	protein	SMR_qac_E-NCBIFAM	complete
integron_01	NODE_112_length_2957_cov_9.683039	NODE_112_length_2957_cov_9.683039_1	19	372	-1	NA	protein	protein	CALIN
integron_01	NODE_112_length_2957_cov_9.683039	attc_001	403	462	-1	7e-10	attC	attC	CALIN
integron_01	NODE_112_length_2957_cov_9.683039	NODE_112_length_2957_cov_9.683039_2	457	1089	-1	9e-138	protein	chloram_CatB-NCBIFAM	CALIN
integron_01	NODE_112_length_2957_cov_9.683039	attc_002	1118	1207	-1	5.4e-07	attC	attC	CALIN
integron_01	NODE_112_length_2957_cov_9.683039	NODE_112_length_2957_cov_9.683039_3	1227	2057	-1	2.4e-199	protein	blaOXA-1_like-NCBIFAM	CALIN
integron_01	NODE_112_length_2957_cov_9.683039	attc_003	2122	2193	-1	3e-07	attC	attC	CALIN
integron_01	NODE_112_length_2957_cov_9.683039	NODE_112_length_2957_cov_9.683039_4	2188	2787	-1	8.8e-133	protein	AAC_6p_Ib-NCBIFAM	CALIN
integron_01	NODE_115_length_2581_cov_13.460065	NODE_115_length_2581_cov_13.460065_1	86	832	-1	NA	protein	protein	CALIN
integron_01	NODE_115_length_2581_cov_13.460065	NODE_115_length_2581_cov_13.460065_2	847	2388	-1	NA	protein	protein	CALIN
integron_01	NODE_115_length_2581_cov_13.460065	attc_001	892	934	-1	0.29	attC	attC	CALIN
integron_01	NODE_115_length_2581_cov_13.460065	attc_002	1599	1705	-1	0.026	attC	attC	CALIN
# cmd: integron_finder --local-max --func-annot R94_S182_Citrobacter_spp_all.fna --cpu 20 --outdir integron_results/R94_S182_Citrobacter_spp_all
# No Integron found
# cmd: integron_finder --local-max --func-annot R94_S183_Escherichia_coli_all.fna --cpu 20 --outdir integron_results/R94_S183_Escherichia_coli_all
# No Integron found
# cmd: integron_finder --local-max --func-annot R94_S185_Escherichia_coli_all.fna --cpu 20 --outdir integron_results/R94_S185_Escherichia_coli_all
ID_integron	ID_replicon	element	pos_beg	pos_end	strand	evalue	type_elt	annotation	type
integron_01	NODE_113_length_5617_cov_5.285974	NODE_113_length_5617_cov_5.285974_1	1	840	1	3.4e-26	protein	intI	In0
# cmd: integron_finder --local-max --func-annot R94_S186_Acinetobacter_baumannii_all.fna --cpu 20 --outdir integron_results/R94_S186_Acinetobacter_baumannii_all
# No Integron found
# cmd: integron_finder --local-max --func-annot R94_S187_Escherichia_coli_all.fna --cpu 20 --outdir integron_results/R94_S187_Escherichia_coli_all
# No Integron found
# cmd: integron_finder --local-max --func-annot R94_S188_Citrobacter_werkmanii_all.fna --cpu 20 --outdir integron_results/R94_S188_Citrobacter_werkmanii_all
# No Integron found
# cmd: integron_finder --local-max --func-annot R94_S189_Klebsiella_pneumoniae_all.fna --cpu 20 --outdir integron_results/R94_S189_Klebsiella_pneumoniae_all
# No Integron found
# cmd: integron_finder --local-max --func-annot R94_S190_Pseudomonas_spp_all.fna --cpu 20 --outdir integron_results/R94_S190_Pseudomonas_spp_all
ID_integron	ID_replicon	element	pos_beg	pos_end	strand	evalue	type_elt	annotation	type
integron_01	NODE_2_length_100614_cov_5.529616	NODE_2_length_100614_cov_5.529616_77	85092	86051	-1	7.5e-25	protein	intI	complete
integron_01	NODE_2_length_100614_cov_5.529616	NODE_2_length_100614_cov_5.529616_78	86134	86766	1	8.2e-133	protein	AAC_6p_Ib-NCBIFAM	complete
integron_01	NODE_2_length_100614_cov_5.529616	attc_001	86761	86832	1	2.1e-06	attC	attC	complete
integron_01	NODE_2_length_100614_cov_5.529616	NODE_2_length_100614_cov_5.529616_79	86848	87762	1	1.4e-198	protein	PSE-NCBIFAM	complete
integron_01	NODE_2_length_100614_cov_5.529616	attc_002	87766	87876	1	5e-05	attC	attC	complete
integron_01	NODE_2_length_100614_cov_5.529616	NODE_2_length_100614_cov_5.529616_80	87979	88326	1	3.8e-64	protein	SMR_qac_E-NCBIFAM	complete
# cmd: integron_finder --local-max --func-annot R94_S191_Escherichia_coli_all.fna --cpu 20 --outdir integron_results/R94_S191_Escherichia_coli_all
ID_integron	ID_replicon	element	pos_beg	pos_end	strand	evalue	type_elt	annotation	type
integron_01	NODE_117_length_5066_cov_4.876696	NODE_117_length_5066_cov_4.876696_1	14	802	-1	1.1e-181	protein	ANT_3pp_AadA1-NCBIFAM	CALIN
integron_01	NODE_117_length_5066_cov_4.876696	attc_001	806	865	-1	2.1e-08	attC	attC	CALIN
integron_01	NODE_117_length_5066_cov_4.876696	NODE_117_length_5066_cov_4.876696_2	860	1384	-1	4e-128	protein	sat2-NCBIFAM	CALIN
integron_01	NODE_117_length_5066_cov_4.876696	attc_002	1390	1484	-1	0.00019	attC	attC	CALIN
integron_01	NODE_117_length_5066_cov_4.876696	NODE_117_length_5066_cov_4.876696_3	1479	1952	-1	4.2e-95	protein	trim_DfrA1_like-NCBIFAM	CALIN
integron_01	NODE_224_length_2581_cov_40.689894	NODE_224_length_2581_cov_40.689894_1	86	832	-1	NA	protein	protein	CALIN
integron_01	NODE_224_length_2581_cov_40.689894	NODE_224_length_2581_cov_40.689894_2	847	2388	-1	NA	protein	protein	CALIN
integron_01	NODE_224_length_2581_cov_40.689894	attc_001	892	934	-1	0.29	attC	attC	CALIN
integron_01	NODE_224_length_2581_cov_40.689894	attc_002	1599	1705	-1	0.026	attC	attC	CALIN
integron_01	NODE_358_length_1997_cov_1.390909	NODE_358_length_1997_cov_1.390909_1	2	112	1	NA	protein	protein	complete
integron_01	NODE_358_length_1997_cov_1.390909	attc_001	277	366	-1	2.5e-06	attC	attC	complete
integron_01	NODE_358_length_1997_cov_1.390909	NODE_358_length_1997_cov_1.390909_2	361	858	-1	4.7e-120	protein	trim_DfrA12-NCBIFAM	complete
integron_01	NODE_358_length_1997_cov_1.390909	NODE_358_length_1997_cov_1.390909_3	1003	1890	1	2.2e-26	protein	intI	complete
# cmd: integron_finder --local-max --func-annot R94_S193_Aeromonas_veronii_all.fna --cpu 20 --outdir integron_results/R94_S193_Aeromonas_veronii_all
# No Integron found
# cmd: integron_finder --local-max --func-annot R94_S194_Klebsiella_pneumoniae_all.fna --cpu 20 --outdir integron_results/R94_S194_Klebsiella_pneumoniae_all
ID_integron	ID_replicon	element	pos_beg	pos_end	strand	evalue	type_elt	annotation	type
integron_01	NODE_48_length_41615_cov_4.294977	NODE_48_length_41615_cov_4.294977_49	39541	39825	1	NA	protein	protein	complete
integron_01	NODE_48_length_41615_cov_4.294977	attc_001	39912	39997	-1	0.031	attC	attC	complete
integron_01	NODE_48_length_41615_cov_4.294977	NODE_48_length_41615_cov_4.294977_50	39992	40465	-1	1.7e-93	protein	trim_DfrA1_like-NCBIFAM	complete
integron_01	NODE_48_length_41615_cov_4.294977	NODE_48_length_41615_cov_4.294977_51	40621	41508	1	3.8e-25	protein	intI	complete
# cmd: integron_finder --local-max --func-annot R94_S195_Providencia_rettgeri_all.fna --cpu 20 --outdir integron_results/R94_S195_Providencia_rettgeri_all
ID_integron	ID_replicon	element	pos_beg	pos_end	strand	evalue	type_elt	annotation	type
integron_01	NODE_22_length_78087_cov_4.491996	NODE_22_length_78087_cov_4.491996_18	10839	11990	-1	NA	protein	protein	CALIN
integron_01	NODE_22_length_78087_cov_4.491996	attc_001	11861	11904	-1	0.27	attC	attC	CALIN
integron_01	NODE_22_length_78087_cov_4.491996	NODE_22_length_78087_cov_4.491996_19	12030	13064	-1	NA	protein	protein	CALIN
integron_01	NODE_22_length_78087_cov_4.491996	NODE_22_length_78087_cov_4.491996_20	13139	13960	-1	NA	protein	protein	CALIN
integron_01	NODE_22_length_78087_cov_4.491996	NODE_22_length_78087_cov_4.491996_21	13971	15221	-1	NA	protein	protein	CALIN
integron_01	NODE_22_length_78087_cov_4.491996	NODE_22_length_78087_cov_4.491996_22	15266	16714	-1	NA	protein	protein	CALIN
integron_01	NODE_22_length_78087_cov_4.491996	attc_002	15603	15649	-1	0.13	attC	attC	CALIN
# cmd: integron_finder --local-max --func-annot R94_S196_Klebsiella_pneumoniae_all.fna --cpu 20 --outdir integron_results/R94_S196_Klebsiella_pneumoniae_all
ID_integron	ID_replicon	element	pos_beg	pos_end	strand	evalue	type_elt	annotation	type
integron_01	NODE_225_length_6697_cov_3.192390	NODE_225_length_6697_cov_3.192390_5	1376	1570	-1	NA	protein	protein	CALIN
integron_01	NODE_225_length_6697_cov_3.192390	attc_001	1616	1670	-1	0.024	attC	attC	CALIN
integron_01	NODE_225_length_6697_cov_3.192390	NODE_225_length_6697_cov_3.192390_6	2021	2773	-1	NA	protein	protein	CALIN
integron_01	NODE_225_length_6697_cov_3.192390	attc_002	2770	2834	-1	0.055	attC	attC	CALIN
integron_01	NODE_225_length_6697_cov_3.192390	NODE_225_length_6697_cov_3.192390_7	2814	3047	1	NA	protein	protein	CALIN
integron_01	NODE_235_length_5687_cov_10.305216	attc_001	118	187	-1	1.2e-07	attC	attC	complete
integron_01	NODE_235_length_5687_cov_10.305216	NODE_235_length_5687_cov_10.305216_1	207	1466	-1	1.5e-290	protein	efflux_CmlA-NCBIFAM	complete
integron_01	NODE_235_length_5687_cov_10.305216	NODE_235_length_5687_cov_10.305216_2	1688	2467	-1	6e-184	protein	ANT_3pp_AadA1-NCBIFAM	complete
integron_01	NODE_235_length_5687_cov_10.305216	NODE_235_length_5687_cov_10.305216_3	2565	3821	-1	4.5e-278	protein	EreA-NCBIFAM	complete
integron_01	NODE_235_length_5687_cov_10.305216	attc_002	3947	4060	-1	0.00075	attC	attC	complete
integron_01	NODE_235_length_5687_cov_10.305216	NODE_235_length_5687_cov_10.305216_4	4067	4519	-1	2.4e-70	protein	rifampin_ARR-NCBIFAM	complete
integron_01	NODE_235_length_5687_cov_10.305216	NODE_235_length_5687_cov_10.305216_5	4692	5579	1	3.7e-26	protein	intI	complete
integron_01	NODE_303_length_2437_cov_8.203896	NODE_303_length_2437_cov_8.203896_1	253	771	1	1.1e-125	protein	AAC_6p_Ib-NCBIFAM	CALIN
integron_01	NODE_303_length_2437_cov_8.203896	attc_001	766	837	1	2.4e-07	attC	attC	CALIN
integron_01	NODE_303_length_2437_cov_8.203896	NODE_303_length_2437_cov_8.203896_2	902	1732	1	1.4e-199	protein	blaOXA-1_like-NCBIFAM	CALIN
integron_01	NODE_303_length_2437_cov_8.203896	attc_002	1752	1841	1	4.5e-07	attC	attC	CALIN
integron_01	NODE_303_length_2437_cov_8.203896	NODE_303_length_2437_cov_8.203896_3	1870	2418	1	NA	protein	protein	CALIN
integron_01	NODE_320_length_2007_cov_7.528191	NODE_320_length_2007_cov_7.528191_1	133	630	1	3.1e-120	protein	trim_DfrA12-NCBIFAM	CALIN
integron_01	NODE_320_length_2007_cov_7.528191	attc_001	625	714	1	1.2e-06	attC	attC	CALIN
integron_01	NODE_320_length_2007_cov_7.528191	attc_002	975	1034	1	4.4e-08	attC	attC	CALIN
integron_01	NODE_320_length_2007_cov_7.528191	NODE_320_length_2007_cov_7.528191_2	1038	1829	1	1.4e-155	protein	ANT_3pp_I-NCBIFAM	CALIN
integron_01	NODE_320_length_2007_cov_7.528191	attc_003	1831	1890	1	6.4e-11	attC	attC	CALIN
# cmd: integron_finder --local-max --func-annot R94_S197_Bordetella_trematum_all.fna --cpu 20 --outdir integron_results/R94_S197_Bordetella_trematum_all
# No Integron found
# cmd: integron_finder --local-max --func-annot R94_S198_Escherichia_coli_all.fna --cpu 20 --outdir integron_results/R94_S198_Escherichia_coli_all
ID_integron	ID_replicon	element	pos_beg	pos_end	strand	evalue	type_elt	annotation	type
integron_01	NODE_46_length_9928_cov_3.144985	NODE_46_length_9928_cov_3.144985_1	109	996	-1	8.9e-26	protein	intI	complete
integron_01	NODE_46_length_9928_cov_3.144985	NODE_46_length_9928_cov_3.144985_2	1141	1638	1	1.9e-119	protein	trim_DfrA12-NCBIFAM	complete
integron_01	NODE_46_length_9928_cov_3.144985	attc_001	1633	1722	1	6.1e-06	attC	attC	complete
integron_01	NODE_46_length_9928_cov_3.144985	attc_002	1983	2042	1	2.2e-07	attC	attC	complete
integron_01	NODE_46_length_9928_cov_3.144985	NODE_46_length_9928_cov_3.144985_3	2058	2837	1	7.7e-155	protein	ANT_3pp_I-NCBIFAM	complete
integron_01	NODE_46_length_9928_cov_3.144985	attc_003	2839	2898	1	3.2e-10	attC	attC	complete
integron_01	NODE_46_length_9928_cov_3.144985	NODE_46_length_9928_cov_3.144985_4	3001	3348	1	5.1e-65	protein	SMR_qac_E-NCBIFAM	complete
# cmd: integron_finder --local-max --func-annot R94_S199_Escherichia_coli_all.fna --cpu 20 --outdir integron_results/R94_S199_Escherichia_coli_all
# No Integron found
# cmd: integron_finder --local-max --func-annot R94_S200_Klebsiella_pneumoniae_all.fna --cpu 20 --outdir integron_results/R94_S200_Klebsiella_pneumoniae_all
ID_integron	ID_replicon	element	pos_beg	pos_end	strand	evalue	type_elt	annotation	type
integron_01	NODE_401_length_2437_cov_6.106061	NODE_401_length_2437_cov_6.106061_1	254	772	1	1.1e-125	protein	AAC_6p_Ib-NCBIFAM	CALIN
integron_01	NODE_401_length_2437_cov_6.106061	attc_001	767	838	1	2.4e-07	attC	attC	CALIN
integron_01	NODE_401_length_2437_cov_6.106061	NODE_401_length_2437_cov_6.106061_2	903	1733	1	1.4e-199	protein	blaOXA-1_like-NCBIFAM	CALIN
integron_01	NODE_401_length_2437_cov_6.106061	attc_002	1753	1842	1	4.5e-07	attC	attC	CALIN
integron_01	NODE_401_length_2437_cov_6.106061	NODE_401_length_2437_cov_6.106061_3	1871	2419	1	NA	protein	protein	CALIN
# cmd: integron_finder --local-max --func-annot R94_S201_Citrobacter_werkmanii_all.fna --cpu 20 --outdir integron_results/R94_S201_Citrobacter_werkmanii_all
ID_integron	ID_replicon	element	pos_beg	pos_end	strand	evalue	type_elt	annotation	type
integron_01	NODE_5_length_296439_cov_3.879907	NODE_5_length_296439_cov_3.879907_236	272282	273241	-1	2.4e-23	protein	intI	In0
# cmd: integron_finder --local-max --func-annot R94_S202_Enterobacter_cloacae_all.fna --cpu 20 --outdir integron_results/R94_S202_Enterobacter_cloacae_all
# No Integron found
# cmd: integron_finder --local-max --func-annot R94_S203_Escherichia_coli_all.fna --cpu 20 --outdir integron_results/R94_S203_Escherichia_coli_all
ID_integron	ID_replicon	element	pos_beg	pos_end	strand	evalue	type_elt	annotation	type
integron_01	NODE_18_length_105411_cov_4.608820	NODE_18_length_105411_cov_4.608820_60	62739	63698	-1	1.7e-23	protein	intI	complete
integron_01	NODE_18_length_105411_cov_4.608820	NODE_18_length_105411_cov_4.608820_61	63984	64457	1	5e-94	protein	trim_DfrA1_like-NCBIFAM	complete
integron_01	NODE_18_length_105411_cov_4.608820	attc_001	64452	64546	1	0.011	attC	attC	complete
integron_01	NODE_18_length_105411_cov_4.608820	NODE_18_length_105411_cov_4.608820_62	64561	65406	1	NA	protein	protein	complete
integron_01	NODE_18_length_105411_cov_4.608820	NODE_18_length_105411_cov_4.608820_63	65509	66300	1	NA	protein	protein	complete
integron_01	NODE_18_length_105411_cov_4.608820	attc_002	66310	66408	1	0.22	attC	attC	complete
integron_01	NODE_18_length_105411_cov_4.608820	attc_003	66701	66787	1	0.024	attC	attC	complete
integron_01	NODE_18_length_105411_cov_4.608820	NODE_18_length_105411_cov_4.608820_64	66808	67071	1	NA	protein	protein	complete
integron_01	NODE_18_length_105411_cov_4.608820	attc_004	67142	67255	1	0.01	attC	attC	complete
integron_01	NODE_66_length_18117_cov_5.872874	NODE_66_length_18117_cov_5.872874_8	4992	6533	-1	NA	protein	protein	CALIN
integron_01	NODE_66_length_18117_cov_5.872874	attc_001	5744	5850	-1	0.18	attC	attC	CALIN
integron_01	NODE_66_length_18117_cov_5.872874	attc_002	6611	6653	-1	0.81	attC	attC	CALIN
integron_01	NODE_92_length_4286_cov_3.698245	NODE_92_length_4286_cov_3.698245_1	3	923	-1	3.9e-26	protein	intI	complete
integron_01	NODE_92_length_4286_cov_3.698245	NODE_92_length_4286_cov_3.698245_2	1068	1565	1	7.8e-120	protein	trim_DfrA12-NCBIFAM	complete
integron_01	NODE_92_length_4286_cov_3.698245	attc_001	1560	1649	1	2.6e-06	attC	attC	complete
integron_01	NODE_92_length_4286_cov_3.698245	attc_002	1910	1969	1	9.5e-08	attC	attC	complete
integron_01	NODE_92_length_4286_cov_3.698245	NODE_92_length_4286_cov_3.698245_3	1985	2764	1	3.2e-155	protein	ANT_3pp_I-NCBIFAM	complete
integron_01	NODE_92_length_4286_cov_3.698245	attc_003	2766	2825	1	1.4e-10	attC	attC	complete
integron_01	NODE_92_length_4286_cov_3.698245	NODE_92_length_4286_cov_3.698245_4	2928	3275	1	2.1e-65	protein	SMR_qac_E-NCBIFAM	complete
# cmd: integron_finder --local-max --func-annot R94_S204_Enterococcus_faecium_all.fna --cpu 20 --outdir integron_results/R94_S204_Enterococcus_faecium_all
# No Integron found
# cmd: integron_finder --local-max --func-annot R94_S205_Escherichia_coli_all.fna --cpu 20 --outdir integron_results/R94_S205_Escherichia_coli_all
ID_integron	ID_replicon	element	pos_beg	pos_end	strand	evalue	type_elt	annotation	type
integron_01	NODE_85_length_2762_cov_29.905882	NODE_85_length_2762_cov_29.905882_1	1	198	-1	NA	protein	protein	complete
integron_01	NODE_85_length_2762_cov_29.905882	attc_001	301	357	-1	8.2e-05	attC	attC	complete
integron_01	NODE_85_length_2762_cov_29.905882	NODE_85_length_2762_cov_29.905882_2	404	1192	-1	8.7e-139	protein	ANT_3pp_I-NCBIFAM	complete
integron_01	NODE_85_length_2762_cov_29.905882	attc_002	1196	1328	-1	6.4e-08	attC	attC	complete
integron_01	NODE_85_length_2762_cov_29.905882	NODE_85_length_2762_cov_29.905882_3	1323	1922	-1	4.7e-93	protein	trim_DfrA1_like-NCBIFAM	complete
integron_01	NODE_85_length_2762_cov_29.905882	NODE_85_length_2762_cov_29.905882_4	1954	2652	1	3e-11	protein	intI	complete
# cmd: integron_finder --local-max --func-annot R94_S206_Escherichia_coli_all.fna --cpu 20 --outdir integron_results/R94_S206_Escherichia_coli_all
ID_integron	ID_replicon	element	pos_beg	pos_end	strand	evalue	type_elt	annotation	type
integron_01	NODE_91_length_2762_cov_5.117647	NODE_91_length_2762_cov_5.117647_2	111	809	-1	3e-11	protein	intI	complete
integron_01	NODE_91_length_2762_cov_5.117647	NODE_91_length_2762_cov_5.117647_3	841	1440	1	9.5e-93	protein	trim_DfrA1_like-NCBIFAM	complete
integron_01	NODE_91_length_2762_cov_5.117647	attc_001	1435	1567	1	6.4e-08	attC	attC	complete
integron_01	NODE_91_length_2762_cov_5.117647	NODE_91_length_2762_cov_5.117647_4	1571	2359	1	8.7e-139	protein	ANT_3pp_I-NCBIFAM	complete
integron_01	NODE_91_length_2762_cov_5.117647	attc_002	2406	2462	1	8.2e-05	attC	attC	complete
integron_01	NODE_91_length_2762_cov_5.117647	NODE_91_length_2762_cov_5.117647_5	2565	2762	1	NA	protein	protein	complete
# cmd: integron_finder --local-max --func-annot R94_S82_Pseudomonas_spp_all.fna --cpu 20 --outdir integron_results/R94_S82_Pseudomonas_spp_all
ID_integron	ID_replicon	element	pos_beg	pos_end	strand	evalue	type_elt	annotation	type
integron_01	NODE_1_length_214615_cov_4.645216	NODE_1_length_214615_cov_4.645216_80	66344	67357	1	1.9e-24	protein	intI	In0
# cmd: integron_finder --local-max --func-annot R94_S83_Pseudomonas_putida_all.fna --cpu 20 --outdir integron_results/R94_S83_Pseudomonas_putida_all
# No Integron found
# cmd: integron_finder --local-max --func-annot R94_S84_Escherichia_coli_all.fna --cpu 20 --outdir integron_results/R94_S84_Escherichia_coli_all
ID_integron	ID_replicon	element	pos_beg	pos_end	strand	evalue	type_elt	annotation	type
integron_01	NODE_81_length_12060_cov_7.369480	NODE_81_length_12060_cov_7.369480_17	10974	11840	-1	1.2e-25	protein	intI	In0
# cmd: integron_finder --local-max --func-annot R94_S85_Klebsiella_quasipneumoniae_all.fna --cpu 20 --outdir integron_results/R94_S85_Klebsiella_quasipneumoniae_all
# No Integron found
# cmd: integron_finder --local-max --func-annot R94_S86_Aeromonas_veronii_2_all.fna --cpu 20 --outdir integron_results/R94_S86_Aeromonas_veronii_2_all
ID_integron	ID_replicon	element	pos_beg	pos_end	strand	evalue	type_elt	annotation	type
integron_01	NODE_51_length_24979_cov_17.629969	NODE_51_length_24979_cov_17.629969_4	2447	2713	-1	NA	protein	protein	complete
integron_01	NODE_51_length_24979_cov_17.629969	attc_001	2854	2939	-1	0.019	attC	attC	complete
integron_01	NODE_51_length_24979_cov_17.629969	NODE_51_length_24979_cov_17.629969_5	2934	3407	-1	1e-93	protein	trim_DfrA1_like-NCBIFAM	complete
integron_01	NODE_51_length_24979_cov_17.629969	NODE_51_length_24979_cov_17.629969_6	3442	4257	-1	4.3e-183	protein	ANT_3pp_AadA1-NCBIFAM	complete
integron_01	NODE_51_length_24979_cov_17.629969	NODE_51_length_24979_cov_17.629969_7	4250	5050	-1	2e-191	protein	blaOXA-10_like-NCBIFAM	complete
integron_01	NODE_51_length_24979_cov_17.629969	attc_002	5226	5295	-1	3.1e-09	attC	attC	complete
integron_01	NODE_51_length_24979_cov_17.629969	NODE_51_length_24979_cov_17.629969_8	5315	6574	-1	9e-290	protein	efflux_CmlA-NCBIFAM	complete
integron_01	NODE_51_length_24979_cov_17.629969	NODE_51_length_24979_cov_17.629969_9	6771	7025	1	NA	protein	protein	complete
integron_01	NODE_51_length_24979_cov_17.629969	NODE_51_length_24979_cov_17.629969_10	7306	7530	1	NA	protein	protein	complete
integron_01	NODE_51_length_24979_cov_17.629969	attc_003	7362	7489	-1	0.0016	attC	attC	complete
integron_01	NODE_51_length_24979_cov_17.629969	NODE_51_length_24979_cov_17.629969_11	7510	8166	-1	1.2e-148	protein	penta_rpt_QnrVC-NCBIFAM	complete
integron_01	NODE_51_length_24979_cov_17.629969	NODE_51_length_24979_cov_17.629969_12	8518	9531	1	2.7e-25	protein	intI	complete
integron_01	NODE_4_length_242375_cov_5.161417	NODE_4_length_242375_cov_5.161417_195	206411	206617	1	NA	protein	protein	CALIN
integron_01	NODE_4_length_242375_cov_5.161417	attc_001	206785	206853	-1	0.14	attC	attC	CALIN
integron_01	NODE_4_length_242375_cov_5.161417	NODE_4_length_242375_cov_5.161417_196	206848	207444	-1	NA	protein	protein	CALIN
integron_01	NODE_4_length_242375_cov_5.161417	attc_002	207491	207546	-1	0.18	attC	attC	CALIN
integron_01	NODE_4_length_242375_cov_5.161417	NODE_4_length_242375_cov_5.161417_197	207534	208328	-1	NA	protein	protein	CALIN
# cmd: integron_finder --local-max --func-annot R94_S87_Escherichia_coli_all.fna --cpu 20 --outdir integron_results/R94_S87_Escherichia_coli_all
ID_integron	ID_replicon	element	pos_beg	pos_end	strand	evalue	type_elt	annotation	type
[truncated: 100 more rows]

## Sheet:  S8d
Table S8d: Presence of ARGs in clinical A. baumanni isolates
#FILE	NUM_FOUND	AAC(3)-IId	AAC(3)-IIe	AAC(3)-Ia	AAC(6')-IIc	AAC(6')-Iaf	AAC(6')-Ian	AAC(6')-Ib-cr	AAC(6')-Ib10	AAC(6')-Ib7	AAC(6')-Ib9	AAC(6')-Il	ADC-10	ADC-11	ADC-2	ADC-25	ADC-3	ADC-30	ADC-31	ADC-39	ADC-4	ADC-5	ADC-56	ADC-58	ADC-6	ADC-68	ADC-7	ADC-73	ADC-74	ADC-75	ADC-76	ADC-77	ADC-79	ADC-81	ADC-82	ANT(2'')-Ia	ANT(3'')-IIa	APH(3'')-Ib	APH(3')-Ia	APH(3')-VI	APH(3')-VIa	APH(6)-Id	Acinetobacter_baumannii_AbaF	Acinetobacter_baumannii_AbaQ	Acinetobacter_baumannii_AmpC_beta-lactamase	Acinetobacter_baumannii_AmvA	CARB-14	CARB-16	CARB-3
GCA_004790725.1_ASM479072v1_genomic.fna	19	.	.	.	.	.	.	.	.	.	.	.	.	.	.	.	.	.	.	.	.	.	.	.	100	.	.	.	.	.	.	.	.	.	.	.	.	.	.	.	.	.	100	100	.	100	.	.	.
GCA_005280435.1_ASM528043v1_genomic.fna	33	.	.	.	.	.	.	.	.	.	.	.	.	.	.	.	.	.	.	.	.	.	.	.	.	.	.	.	.	.	.	.	100	.	.	.	.	100	.	100	.	100	100	100	.	100	.	.	.
GCA_005280675.1_ASM528067v1_genomic.fna	14	.	.	.	.	.	.	.	.	.	.	.	.	.	100	.	.	.	.	.	.	.	.	.	.	.	.	.	.	.	.	.	.	.	.	.	.	.	.	.	.	.	.	100	.	100	.	.	.
GCA_007113795.1_ASM711379v1_genomic.fna	30	.	.	.	.	.	.	.	.	.	.	.	.	.	.	.	.	.	.	.	.	.	.	.	.	.	.	100	.	.	.	.	.	.	.	.	.	100	100	.	.	100	100	100	.	100	.	.	.
GCA_009857695.1_ASM985769v1_genomic.fna	36	.	.	.	.	.	.	.	.	.	.	.	.	.	.	.	.	.	.	.	.	.	.	100	.	.	.	.	.	.	.	.	.	.	.	100	83.54	.	.	.	.	.	100	100	.	100	.	.	.
GCA_010178915.1_ASM1017891v1_genomic.fna	32	.	.	.	.	.	.	.	.	100	.	.	.	.	100	.	.	.	.	.	.	.	.	.	.	.	.	.	.	.	.	.	.	.	.	.	82.51	100	100	.	.	100	100	100	.	100	.	.	.
GCA_010178955.1_ASM1017895v1_genomic.fna	28	.	.	.	.	.	.	.	.	.	.	.	.	.	.	.	.	.	.	.	.	.	.	.	.	.	.	100	.	.	.	.	.	.	.	.	.	100	100	.	.	100	100	100	.	100	.	.	.
GCA_010179335.1_ASM1017933v1_genomic.fna	26	.	.	.	.	.	.	.	.	.	.	.	.	.	.	.	.	100	.	.	.	.	.	.	.	.	.	.	.	.	.	.	.	.	.	.	.	100	.	.	100	100	100	100	.	100	.	.	.
GCA_010499755.1_ASM1049975v1_genomic.fna	19	.	.	.	.	.	.	.	.	.	.	.	.	.	.	.	.	.	.	.	.	.	.	.	.	.	.	.	.	.	.	.	.	.	.	.	.	.	.	.	.	.	100	99.92	100	100	.	.	.
GCA_010499785.1_ASM1049978v1_genomic.fna	20	.	.	.	.	.	.	.	.	.	.	.	.	.	.	.	.	.	.	.	.	.	.	.	.	.	.	.	.	.	.	.	.	.	.	.	.	.	.	100	.	.	.	100	100	100	.	.	.
GCA_010499945.1_ASM1049994v1_genomic.fna	14	.	.	.	.	.	.	.	.	.	.	.	.	.	100	.	.	.	.	.	.	.	.	.	.	.	.	.	.	.	.	.	.	.	.	.	.	.	.	.	.	.	.	100	.	100	.	.	.
GCA_010500345.1_ASM1050034v1_genomic.fna	33	.	.	.	.	.	.	.	.	.	.	.	.	.	.	.	.	.	.	.	.	.	.	.	.	.	.	.	.	.	.	.	100	.	.	.	.	100	.	100	.	100	100	100	.	100	.	.	.
GCA_010500385.1_ASM1050038v1_genomic.fna	31	.	.	.	.	.	.	.	.	.	.	.	.	.	.	.	.	.	.	.	.	.	.	.	.	.	.	.	.	.	.	.	100	.	.	.	.	100	.	100	.	100	100	100	.	100	.	.	.
GCA_010500415.1_ASM1050041v1_genomic.fna	20	.	.	.	.	.	.	.	.	.	.	.	.	.	.	.	.	.	.	.	.	.	.	.	.	.	.	.	.	.	.	.	.	.	.	100	.	.	.	100	.	.	100	100	.	100	.	.	.
GCA_010500545.1_ASM1050054v1_genomic.fna	31	.	.	.	.	.	.	.	.	.	.	.	.	.	.	.	.	.	.	.	.	.	.	.	.	.	.	.	.	.	100	.	.	.	.	.	.	100	.	.	.	100	100	100	.	100	.	.	.
GCA_011601365.1_ASM1160136v1_genomic.fna	31	.	.	.	.	.	.	.	.	.	.	.	.	.	.	.	.	.	.	.	.	.	.	.	.	.	.	.	.	.	.	.	100	.	.	.	.	100	.	.	.	100	100	100	.	100	.	.	.
GCA_011603765.1_ASM1160376v1_genomic.fna	35	.	.	.	.	.	.	.	.	100	.	.	.	.	.	.	.	100	.	.	.	.	.	.	.	.	.	.	.	.	.	.	.	.	.	.	82.51	100	100	.	.	100	100	100	.	100	.	.	.
GCA_012272715.1_ASM1227271v1_genomic.fna	28	.	.	.	.	.	.	.	.	100	.	.	.	.	.	.	.	100	.	.	.	.	.	.	.	.	.	.	.	.	.	.	.	.	.	.	82.51	100	100	.	.	100	100	100	.	100	.	.	.
GCA_012934905.1_ASM1293490v1_genomic.fna	32	.	.	.	.	.	100	.	.	.	.	.	.	.	.	.	.	.	.	.	.	.	.	.	.	.	.	.	.	.	.	.	100	.	.	.	.	100	.	.	.	100	100	100	.	100	.	.	.
GCA_012934925.1_ASM1293492v1_genomic.fna	31	.	.	.	.	.	.	.	.	.	.	.	.	.	.	.	.	.	.	.	.	.	.	.	.	.	.	100	.	.	.	.	.	.	.	.	.	100.00;100.00	100	.	.	100.00;100.00	100	100	.	100	.	.	.
GCA_012935005.1_ASM1293500v1_genomic.fna	29	.	.	.	.	.	.	.	.	.	.	.	.	.	.	.	.	.	.	.	.	.	.	.	.	.	.	.	.	.	.	.	100	.	.	.	.	100	.	100	.	100	100	100	.	100	.	.	.
GCA_012935105.1_ASM1293510v1_genomic.fna	34	.	.	.	.	.	.	.	.	.	.	.	.	.	.	.	.	.	.	.	.	.	.	.	.	.	.	.	.	.	100	.	.	.	.	.	.	100.00;100.00	.	.	100	100.00;100.00	100	100	.	100	.	.	.
GCA_012935125.1_ASM1293512v1_genomic.fna	28	.	.	.	.	.	.	.	.	.	.	.	.	.	.	.	.	.	.	.	.	.	.	.	.	.	.	.	.	.	100	.	.	.	.	.	.	100.00;100.00	.	.	.	100.00;100.00	100	100	.	100	.	.	.
GCA_012935145.1_ASM1293514v1_genomic.fna	31	.	.	.	.	.	.	.	.	.	.	.	.	.	.	.	.	.	.	.	.	.	.	.	.	.	.	100	.	.	.	.	.	.	.	.	.	100.00;100.00	100	.	.	100.00;100.00	100	100	.	100	.	.	.
GCA_013344855.1_ASM1334485v1_genomic.fna	23	.	.	.	.	.	.	.	.	.	.	.	.	.	.	.	.	.	.	.	.	.	.	.	.	.	.	.	.	.	100	.	.	.	.	100	82.3	.	100	.	.	.	100	100	.	100	.	100	.
GCA_013346525.1_ASM1334652v1_genomic.fna	24	.	.	100	.	.	.	.	.	.	.	.	.	.	.	100	.	.	.	.	.	.	.	.	.	.	.	.	.	.	.	.	.	.	.	.	82.51	.	.	.	.	.	.	100	.	100	.	.	.
GCA_013778425.1_ASM1377842v1_genomic.fna	31	100	.	.	.	.	.	.	.	.	.	.	.	.	.	.	.	.	.	.	.	.	.	.	.	.	.	.	.	.	.	.	.	.	.	.	82.51	.	.	100	.	.	100	100	100	100	.	.	.
GCA_014322245.1_ASM1432224v1_genomic.fna	24	100	.	.	.	.	.	.	.	.	.	.	.	.	100	.	.	.	.	.	.	.	.	.	.	.	.	.	.	.	.	.	.	.	.	.	.	.	.	.	.	.	100	100	.	100	.	.	.
GCA_015265765.1_ASM1526576v1_genomic.fna	33	.	.	.	.	.	.	.	.	.	94.77	.	.	.	.	.	.	.	.	.	.	.	.	.	100	.	.	.	.	.	.	.	.	.	.	.	.	100	.	.	100	100	100	100	.	100	.	100	100
GCA_015265775.1_ASM1526577v1_genomic.fna	29	.	.	.	.	.	.	.	.	.	.	.	.	.	.	.	.	.	.	.	.	100	.	.	.	.	.	.	.	.	.	.	.	.	.	100	82.3	.	100	.	100	.	100	100	.	100	.	100	.
GCA_015265785.1_ASM1526578v1_genomic.fna	14	.	.	.	.	.	.	.	.	.	.	.	.	.	.	.	.	.	.	.	.	.	.	.	.	100	.	.	.	.	.	.	.	.	.	.	.	.	.	.	.	.	.	100	.	100	.	.	.
GCA_015666365.1_ASM1566636v1_genomic.fna	26	.	.	.	.	.	.	.	.	.	.	.	.	.	.	.	.	.	.	.	.	100	.	.	.	.	.	.	.	.	.	.	.	.	.	.	82.3	100	.	.	.	100	100	100	.	100	.	.	.
GCA_015666475.1_ASM1566647v1_genomic.fna	31	.	.	100	.	.	.	.	.	.	.	.	.	.	.	.	.	.	.	.	.	100	.	.	.	.	.	.	.	.	.	.	.	.	.	.	.	100	.	.	100	100	100	100	.	100	.	.	.
GCA_015732435.1_ASM1573243v1_genomic.fna	29	.	.	.	.	.	.	.	.	100	.	.	.	.	.	.	.	100	.	.	.	.	.	.	.	.	.	.	.	.	.	.	.	.	.	.	82.51	100	.	.	.	100	100	100	.	100	.	.	.
GCA_016054925.1_ASM1605492v1_genomic.fna	24	.	.	.	.	.	.	.	.	.	.	.	.	.	100	.	.	.	.	.	.	.	.	.	.	.	.	.	.	.	.	.	.	.	.	.	.	.	.	.	100	.	100	100	.	100	.	.	.
GCA_016055595.1_ASM1605559v1_genomic.fna	33	.	.	.	.	.	.	.	.	.	.	.	.	.	.	.	.	.	.	.	.	100	.	.	.	.	.	.	.	.	.	.	.	.	.	.	82.3	100	.	.	100	100	100	100	.	100	.	.	.
GCA_016055685.1_ASM1605568v1_genomic.fna	32	.	.	.	.	.	.	.	.	.	.	.	.	.	.	.	.	.	.	.	.	100	.	.	.	.	.	.	.	.	.	.	.	.	.	.	82.3	100	.	.	100	100	100	100	.	100	.	.	.
GCA_016055715.1_ASM1605571v1_genomic.fna	25	.	.	.	.	.	.	.	.	.	.	.	.	.	.	.	.	.	.	.	.	100	.	.	.	.	.	.	.	.	.	.	.	.	.	.	.	100	.	.	.	100	100	100	.	100	.	.	.
GCA_016055835.1_ASM1605583v1_genomic.fna	31	.	.	.	.	.	.	.	.	.	.	.	.	.	.	.	.	.	.	.	.	100	.	.	.	.	.	.	.	.	.	.	.	.	.	.	82.3	.	.	.	100	100	100	100	.	100	.	.	.
GCA_016055945.1_ASM1605594v1_genomic.fna	25	.	.	.	.	.	.	.	.	.	.	.	.	.	.	.	.	.	.	.	.	100	.	.	.	.	.	.	.	.	.	.	.	.	.	.	.	100	.	.	.	100	100	100	.	100	.	.	.
GCA_016056095.1_ASM1605609v1_genomic.fna	26	.	.	.	.	.	.	.	.	.	.	.	.	.	.	.	.	.	.	.	.	100	.	.	.	.	.	.	.	.	.	.	.	.	.	.	.	100	.	.	.	100	100	100	.	100	.	.	.
GCA_016056145.1_ASM1605614v1_genomic.fna	29	.	.	.	.	.	.	.	.	.	.	.	.	.	.	.	.	.	.	.	.	100	.	.	.	.	.	.	.	.	.	.	.	.	.	.	82.3	100	.	.	.	100	100	100	.	100	.	.	.
GCA_016125715.1_ASM1612571v1_genomic.fna	25	100	.	.	.	.	.	.	.	.	.	.	.	.	100	.	.	.	.	.	.	.	.	.	.	.	.	.	.	.	.	.	.	.	.	.	.	.	.	100	.	.	.	100	.	100	.	100	.
GCA_016350105.1_ASM1635010v1_genomic.fna	28	.	.	.	.	.	.	.	.	100	.	.	.	.	.	.	.	100	.	.	.	.	.	.	.	.	.	.	.	.	.	.	.	.	.	.	82.51	.	.	.	.	.	100	100	.	100	.	.	.
GCA_016416045.1_ASM1641604v1_genomic.fna	24	.	.	100	.	.	.	.	.	.	.	.	.	.	.	.	.	.	.	.	.	100	.	.	.	.	.	.	.	.	.	.	.	.	.	.	.	.	100	.	.	.	100	100	.	100	.	.	.
GCA_016471115.2_PDT000901874.2_genomic.fna	20	.	.	.	.	.	100.00;100.00	.	.	.	.	.	.	.	.	.	.	.	.	.	.	.	.	.	.	.	.	.	.	.	.	.	100.00;100.00	.	.	100.00;100.00	.	.	100.00;100.00	.	.	.	100	100	.	99.8	.	.	.
GCA_016473315.1_PDT000893905.1_genomic.fna	25	.	.	.	.	.	.	.	.	.	.	.	.	.	.	.	.	.	.	.	.	.	.	.	.	.	.	100.00;100.00	.	.	.	.	.	.	.	.	.	.	87.01;87.62	.	100	.	100	.	.	100	.	.	.
GCA_016473675.2_PDT000893725.2_genomic.fna	23	.	.	.	.	.	.	.	.	.	.	.	.	.	.	.	.	98.87;100.00	.	.	.	.	.	.	.	.	.	.	.	.	.	.	.	.	.	.	.	100.00;100.00	.	.	.	100.00;100.00	100	100	.	100	.	.	.
GCA_016475185.2_PDT000868671.2_genomic.fna	27	.	.	.	.	100.00;100.00	.	.	.	.	.	.	.	.	.	.	.	100.00;100.00	.	.	.	.	.	.	.	.	.	.	.	.	.	.	.	.	.	.	82.51	100.00;100.00	.	.	.	100.00;100.00	100	100	.	100	.	.	.
GCA_016475525.2_PDT000868645.2_genomic.fna	31	.	.	.	.	.	.	.	.	.	.	.	.	.	.	.	.	100.00;100.00	.	.	.	.	.	.	.	.	.	.	.	.	.	.	.	.	.	100.00;100.00	.	.	.	.	.	.	100	100	.	100	.	.	100.00;100.00
GCA_016475765.2_PDT000868623.2_genomic.fna	25	.	.	.	.	.	.	.	.	.	.	.	.	.	.	.	.	.	.	.	.	.	.	.	.	.	.	.	.	.	.	.	100.00;100.00	.	.	.	.	100.00;100.00;100.00	.	100.00;100.00	.	100.00;100.00;100.00	100	100	.	100	.	.	.
GCA_016478985.2_PDT000864236.2_genomic.fna	21	.	.	.	.	.	.	.	.	.	.	.	.	.	.	.	.	.	.	.	.	.	.	.	.	.	.	.	.	.	.	.	.	.	.	.	.	100.00;100.00	.	.	.	100.00;100.00	100	100	100.00;100.00	100	.	.	.
GCA_016480415.2_PDT000850559.2_genomic.fna	19	.	.	.	.	.	.	.	.	.	.	.	.	.	.	.	.	.	.	.	100.00;100.00	.	.	.	.	.	.	.	.	.	.	.	.	.	.	.	.	.	.	.	.	.	100	100	.	100	.	.	.
GCA_016480565.2_PDT000850554.2_genomic.fna	23	.	.	.	.	.	.	.	.	.	.	.	.	.	.	.	.	100.00;100.00	.	.	.	.	.	.	.	.	.	.	.	.	.	.	.	.	.	.	.	100.00;100.00	100.00;100.00	.	.	100.00;100.00	100	.	.	100	.	.	.
GCA_016482925.2_PDT000821582.2_genomic.fna	27	.	.	.	.	.	93.89;94.07	.	.	.	.	.	.	.	.	.	.	.	.	.	.	.	.	.	.	.	.	.	.	.	.	.	.	.	.	.	.	98.63;100.00	.	.	.	100.00;100.00	100	100	100.00;100.00	100	.	.	.
GCA_016489265.2_PDT000733287.2_genomic.fna	24	.	.	.	.	.	.	.	.	.	.	.	.	.	.	.	.	100.00;100.00	.	.	.	.	.	.	.	.	.	.	.	.	.	.	.	.	.	.	.	100.00;100.00	.	.	.	100.00;100.00	100	100	.	100	.	.	.
GCA_016489925.2_PDT000733214.2_genomic.fna	22	.	.	.	.	.	.	.	.	.	.	.	.	.	.	100.00;100.00	.	.	.	.	.	.	.	.	.	.	.	.	.	.	.	.	.	.	.	.	.	100.00;100.00	.	.	.	100.00;100.00	100	100	.	100	.	.	.
GCA_016490465.2_PDT000725284.2_genomic.fna	29	.	.	100.00;100.00	.	100.00;100.00	.	.	.	.	.	.	.	.	.	.	.	100.00;100.00	.	.	.	.	.	.	.	.	.	.	.	.	.	.	.	.	.	.	82.51;82.51	100.00;100.00	.	.	.	100.00;100.00	100	100	.	100	.	.	.
GCA_016506005.1_ASM1650600v1_genomic.fna	14	.	.	.	.	.	.	.	.	.	.	.	.	.	100	.	.	.	.	.	.	.	.	.	.	.	.	.	.	.	.	.	.	.	.	.	.	.	.	.	.	.	.	.	.	100	.	.	.
GCA_016506045.1_ASM1650604v1_genomic.fna	19	.	.	.	.	.	.	.	.	.	.	.	.	.	100	.	.	.	.	.	.	.	.	.	.	.	.	.	.	.	.	.	.	.	.	.	.	.	.	.	.	.	100	100	.	100	.	.	.
GCA_016635075.1_ASM1663507v1_genomic.fna	29	100	.	.	.	.	.	.	.	.	.	.	.	.	.	.	.	.	.	.	.	.	.	.	100	.	.	.	.	.	.	.	.	.	.	100	.	100	.	.	.	100	100	100	.	100	.	.	.
GCA_016654165.1_ASM1665416v1_genomic.fna	32	.	96.86	.	.	.	100	.	.	.	.	.	.	.	.	.	.	.	.	.	.	.	.	.	.	.	.	.	.	.	.	.	100	.	.	.	.	100	.	.	.	100	100	100	.	100	.	.	.
GCA_016654255.2_ASM1665425v2_genomic.fna	21	.	.	.	.	.	.	.	.	.	.	.	.	.	.	.	.	.	.	.	.	.	.	.	100	.	.	.	.	.	.	.	.	.	.	.	.	.	.	.	100	.	100	100	.	100	.	.	.
GCA_016654265.1_ASM1665426v1_genomic.fna	17	.	.	.	.	.	.	.	.	.	.	.	.	.	.	.	100	.	.	.	.	.	.	.	.	.	.	.	.	.	.	.	.	.	.	.	.	.	.	.	.	.	100	100	.	100	.	.	.
GCA_016654295.1_ASM1665429v1_genomic.fna	14	.	.	.	.	.	.	.	.	.	.	.	.	.	100	.	.	.	.	.	.	.	.	.	.	.	.	.	.	.	.	.	.	.	.	.	.	.	.	.	.	.	.	.	.	100	.	.	.
GCA_016654335.1_ASM1665433v1_genomic.fna	25	.	.	100	.	.	.	.	.	.	.	.	.	100	.	.	.	.	.	.	.	.	.	.	.	.	.	.	.	.	.	.	.	.	.	.	82.51	.	.	100	.	.	100	100	.	100	.	.	.
GCA_016762855.1_ASM1676285v1_genomic.fna	30	.	.	.	.	.	.	.	.	.	.	.	.	.	.	.	.	100	.	.	.	.	.	.	.	.	.	.	.	.	.	.	.	.	.	.	.	.	.	.	100	.	100	100	.	100	.	.	.
GCA_016973895.2_PDT000968742.2_genomic.fna	23	.	.	100.00;100.00	.	.	.	.	.	.	.	.	.	.	.	.	.	.	.	.	.	.	.	.	.	.	.	.	.	.	.	.	100.00;100.00;100.00	.	.	.	.	.	.	.	.	.	100	100	.	100	.	.	.
GCA_017098225.2_ASM1709822v2_genomic.fna	34	.	.	.	.	.	.	.	.	100	.	.	.	.	.	.	.	100	.	.	.	.	.	.	.	.	.	.	.	.	.	.	.	.	.	.	82.51	100	100.00;100.00	.	.	100	100	100	.	100	.	.	.
GCA_017142385.2_PDT000947638.2_genomic.fna	21	.	.	.	.	.	.	.	.	.	.	.	.	100.00;100.00	.	.	.	.	.	.	.	.	.	.	.	.	.	.	.	.	.	.	.	.	.	.	.	.	.	.	.	.	100	100	.	100	.	.	.
GCA_017143195.2_PDT000947599.2_genomic.fna	34	.	.	.	.	.	.	.	.	100.00;93.26	.	.	.	.	.	.	.	100.00;100.00	.	.	.	.	.	.	.	.	.	.	.	.	.	.	.	.	.	.	82.51;82.51	100.00;100.00	100.00;100.00	.	100	100.00;100.00	100	100	.	100	.	.	.
GCA_017143335.2_PDT000947592.2_genomic.fna	26	.	.	100.00;100.00	.	.	.	.	.	.	.	.	.	.	.	100.00;100.00	.	.	.	.	.	.	.	.	.	.	.	.	.	.	.	.	.	.	.	.	82.51;82.51	.	.	.	.	.	100	100	.	100	.	.	.
GCA_017168535.1_ASM1716853v1_genomic.fna	30	.	.	.	.	.	.	.	.	.	.	.	.	.	.	.	.	.	.	.	.	.	.	.	.	.	.	.	.	.	.	.	100	.	.	100	82.3	.	100	.	.	.	100	100	.	100	.	100	.
GCA_017168645.1_ASM1716864v1_genomic.fna	31	.	.	100	.	.	.	.	.	.	.	.	.	.	.	.	.	.	.	.	.	.	.	.	.	.	.	.	.	.	.	.	100	.	.	.	.	100	100	.	.	86.26	100	.	.	100	.	.	.
GCA_017168905.1_ASM1716890v1_genomic.fna	33	100	.	.	.	.	.	.	.	.	.	.	.	.	.	.	.	.	.	.	.	.	.	.	.	.	.	.	.	.	.	.	.	.	.	100	.	100	100	.	97.31	100	100	100	.	100	.	100	.
GCA_017724155.1_ASM1772415v1_genomic.fna	33	.	.	.	.	.	.	.	.	.	.	.	.	.	.	.	.	.	.	.	.	.	.	.	.	.	.	.	.	.	.	.	100	.	.	.	.	100	.	.	100	100	100	100	.	100	.	.	.
GCA_017726575.1_ASM1772657v1_genomic.fna	20	.	.	.	.	.	.	.	.	.	.	.	.	.	.	.	.	.	.	.	.	100	.	.	.	.	.	.	.	.	.	.	.	.	.	.	.	.	.	.	.	.	100	100	.	100	.	.	.
GCA_017897405.1_ASM1789740v1_genomic.fna	28	.	.	.	.	.	.	.	.	.	.	.	.	.	.	.	.	.	.	.	.	.	.	.	.	.	.	100	.	.	.	.	.	.	.	.	.	100	100	.	.	100	100	100	.	100	.	.	.
GCA_017897645.1_ASM1789764v1_genomic.fna	20	.	.	.	.	.	.	.	.	.	.	.	.	.	.	.	.	.	.	.	.	.	.	.	.	.	.	94.62	.	.	.	.	.	.	.	.	.	.	.	.	.	.	100	100	.	100	.	.	.
GCA_018068145.1_ASM1806814v1_genomic.fna	29	.	100	.	.	.	.	.	95.92	.	.	.	.	.	.	100	.	.	.	.	.	.	.	.	.	.	.	.	.	.	.	.	.	.	.	.	.	.	.	.	.	.	100	100	.	100	.	.	.
GCA_018135585.1_ASM1813558v1_genomic.fna	19	.	.	.	.	.	.	.	.	.	.	.	.	.	.	.	.	.	.	.	.	.	.	.	100	.	.	.	.	.	.	.	.	.	.	.	.	.	.	.	.	.	100	100	.	100	.	.	.
GCA_018156065.1_ASM1815606v1_genomic.fna	20	.	.	.	.	.	.	.	.	.	.	.	.	100	.	.	.	.	.	.	.	.	.	.	.	.	.	.	.	.	.	.	.	.	.	.	.	.	.	.	.	.	100	100	.	100	.	.	.
GCA_018221365.1_ASM1822136v1_genomic.fna	25	.	.	.	.	.	.	.	.	.	.	.	.	.	.	.	.	.	.	.	.	.	.	.	100	.	.	.	.	.	.	.	.	.	.	100	.	.	.	.	100	.	100	100	.	100	.	.	.
GCA_018221375.1_ASM1822137v1_genomic.fna	26	.	.	100	.	100	.	.	.	.	.	.	.	.	.	.	.	100	.	.	.	.	.	.	.	.	.	.	.	.	.	.	.	.	.	.	.	100	.	.	.	100	100	100	.	100	.	.	.
GCA_018288475.2_PDT001019284.2_genomic.fna	25	.	.	.	.	.	.	.	.	.	.	.	.	.	.	100.00;100.00	.	.	.	.	.	.	.	.	.	.	.	.	.	.	.	.	.	.	.	100.00;100.00	.	.	.	.	.	.	100	100	.	100	.	.	.
GCA_018422645.1_ASM1842264v1_genomic.fna	26	.	.	.	.	.	.	.	.	.	.	.	100	.	.	.	.	.	.	.	.	.	.	.	.	.	.	.	.	.	.	.	.	.	.	88.39	.	.	100	.	.	.	100	100	.	100	.	.	.
GCA_018423275.1_ASM1842327v1_genomic.fna	31	.	.	.	.	.	.	.	.	.	.	.	.	.	.	.	.	.	.	.	.	.	.	.	.	.	.	100	.	.	.	.	.	.	.	.	.	100	100	100	.	100	100	100	.	100	.	.	.
GCA_018446635.1_ASM1844663v1_genomic.fna	31	.	.	100	.	.	.	.	.	.	.	.	.	.	.	.	.	100	.	.	.	.	.	.	.	.	.	.	.	.	.	.	.	.	.	.	.	100	100	.	.	100	100	100	.	100	.	.	.
GCA_018447265.1_ASM1844726v1_genomic.fna	26	.	.	100	.	.	.	.	.	.	.	.	.	100	.	.	.	.	.	.	.	.	.	.	.	.	.	.	.	.	.	.	.	.	.	.	82.51	.	.	.	100	.	100	100	.	100	.	.	.
GCA_018678125.1_ASM1867812v1_genomic.fna	14	.	.	.	.	.	.	.	.	.	.	.	.	.	.	.	.	.	.	.	.	.	.	.	.	.	.	.	.	.	.	.	100	.	.	.	.	.	.	.	.	.	.	100	.	100	.	.	.
GCA_019076685.1_ASM1907668v1_genomic.fna	17	.	.	.	.	.	.	.	.	.	.	.	.	.	.	.	100	.	.	.	.	.	.	.	.	.	.	.	.	.	.	.	.	.	.	.	.	.	.	.	.	.	100	100	.	100	.	.	.
GCA_019188885.1_ASM1918888v1_genomic.fna	25	.	.	.	.	.	.	.	.	.	.	.	100	.	.	.	.	.	.	.	.	.	.	.	.	.	.	.	.	.	.	.	.	.	.	100	.	.	.	.	.	.	100	100	.	99.8	.	.	.
GCA_019188935.1_ASM1918893v1_genomic.fna	31	.	.	.	.	.	.	.	.	100	.	.	.	.	.	.	.	.	.	.	.	.	.	.	.	.	.	82.38	.	.	.	.	.	.	.	.	82.51	.	100	100	.	.	100	100	.	100	.	.	.
GCA_019188965.1_ASM1918896v1_genomic.fna	20	.	.	.	.	.	.	.	.	.	.	.	.	.	.	.	.	.	.	.	.	.	.	.	100	.	.	.	.	.	.	.	.	.	.	.	.	.	.	100	.	.	96.67	100	.	97.3	.	100	.
GCA_019188985.1_ASM1918898v1_genomic.fna	22	.	.	.	.	.	.	.	.	.	.	.	.	.	.	.	.	.	.	.	.	.	.	.	.	.	.	.	.	.	.	.	100	.	.	100	.	.	.	.	.	.	.	100	.	100	.	.	.
GCA_019506005.2_PDT001106423.2_genomic.fna	20	.	.	.	.	.	100.00;100.00	.	.	.	.	.	.	.	.	100.00;100.00	.	.	.	.	.	.	.	.	.	.	.	.	.	.	.	.	.	.	.	.	.	100.00;100.00	.	.	.	100.00;100.00	100	100	.	100	.	.	.
GCA_019506785.2_PDT001106465.2_genomic.fna	24	.	.	.	.	.	.	.	.	.	.	.	.	.	.	.	.	100.00;100.00	.	.	.	.	.	.	.	.	.	.	.	.	.	.	.	.	.	.	.	100.00;100.00	.	.	.	100.00;100.00	100	100	.	100	.	.	.
GCA_019724955.1_PDT001114929.1_genomic.fna	19	.	.	.	.	.	.	.	.	.	.	.	.	.	.	.	.	.	.	.	.	.	.	.	100.00;100.00	.	.	.	.	.	.	.	.	.	.	.	.	.	.	.	.	.	.	100	.	100	.	.	.
GCA_019725235.1_PDT001115057.1_genomic.fna	26	.	.	.	.	.	100.00;100.00	.	.	.	.	.	.	.	.	.	.	.	.	.	.	.	.	.	100.00;100.00	.	.	.	.	.	.	.	.	.	.	.	.	100.00;100.00	.	.	100.00;100.00	100.00;100.00	100	100	.	100	.	.	.
GCA_019725315.1_PDT001114953.1_genomic.fna	26	.	100.00;100.00	.	.	.	100.00;100.00	.	.	.	.	.	.	.	.	.	.	.	.	.	.	.	.	.	81.60;82.38	.	.	.	.	.	.	.	.	.	.	.	.	100.00;100.00	.	.	.	100.00;100.00	.	100	.	100	.	.	.
GCA_019732955.1_PDT001114955.1_genomic.fna	28	.	.	.	.	.	.	.	.	100.00;100.00	.	.	.	.	.	.	.	100.00;100.00	.	.	.	.	.	.	.	.	.	.	.	.	.	.	.	.	.	.	82.51;82.51	100.00;100.00	.	.	.	100.00;100.00	100	100	.	100	.	.	.
GCA_019732975.1_PDT001114975.1_genomic.fna	26	.	.	.	.	.	.	.	.	.	.	.	.	.	.	.	.	.	.	.	.	100.00;100.00	.	.	.	.	.	.	.	.	.	.	.	.	.	100.00;100.00	.	.	.	.	100.00;100.00	.	100	100	.	100	.	.	.
GCA_019738875.1_PDT001114960.1_genomic.fna	30	.	.	100.00;100.00	.	.	100.00;100.00	.	.	.	.	.	.	.	.	100.00;100.00	.	.	.	.	.	.	.	.	.	.	.	.	.	.	.	.	.	.	.	100.00;100.00	82.51;82.51	100.00;100.00	98.16;100.00	.	.	100.00;100.00	100	100	.	100	.	.	.
GCA_019891055.1_ASM1989105v1_genomic.fna	27	.	.	.	.	.	.	.	.	.	.	.	.	.	.	.	.	100	.	.	.	.	.	.	.	.	.	.	.	.	.	.	.	.	.	100	.	100	.	.	100	100	100	100	.	100	.	.	.
GCA_019891095.1_ASM1989109v1_genomic.fna	29	.	.	.	.	.	.	.	.	.	.	.	.	.	.	.	.	.	.	.	.	.	.	.	.	.	.	100	.	.	.	.	.	.	.	.	.	.	100	100	.	.	100	100	.	100	.	.	.
GCA_019891135.1_ASM1989113v1_genomic.fna	22	.	.	.	.	.	.	.	.	.	.	.	.	.	.	.	.	.	.	.	.	.	.	.	.	.	.	.	.	.	.	.	.	100	.	.	.	.	.	.	100	.	100	100	.	100	.	.	.
GCA_020251225.1_ASM2025122v1_genomic.fna	23	.	.	.	.	.	.	.	.	.	.	.	.	.	.	.	.	.	.	.	.	.	.	.	.	.	.	100	.	.	.	.	.	.	.	.	.	100	.	.	.	100	100	.	.	100	.	.	.
GCA_020251245.1_ASM2025124v1_genomic.fna	30	.	.	.	.	.	.	.	.	.	.	.	.	.	.	.	.	.	.	.	.	.	.	.	.	.	.	.	.	.	.	.	100	.	.	.	.	100	.	.	.	100	100	100	.	100	.	.	.
GCA_020251645.1_P10-U58_genomic.fna	26	.	.	.	.	.	.	.	.	.	.	.	.	.	.	.	.	.	.	.	.	.	.	.	.	.	.	.	.	.	.	.	.	.	.	.	.	100	.	.	100	100	100	100	100	100	.	.	.
GCA_020255665.1_ASM2025566v1_genomic.fna	20	.	.	.	.	.	.	.	.	.	.	.	.	.	.	.	100	.	.	.	.	.	.	.	.	.	.	.	.	.	.	.	.	.	.	.	.	.	.	.	.	.	100	100	.	100	.	.	.
GCA_020255795.1_ASM2025579v1_genomic.fna	29	.	.	100	.	.	.	.	.	.	.	.	.	.	.	.	.	100	.	.	.	.	.	.	.	.	.	.	.	.	.	.	.	.	.	.	82.51	100	.	100	.	100	100	100	.	100	.	.	.
GCA_020255865.1_ASM2025586v1_genomic.fna	31	.	.	.	.	.	.	.	.	.	.	.	.	.	.	.	.	100	.	.	.	.	.	.	.	.	.	.	.	.	.	.	.	.	.	.	.	100	100	.	100	100	100	100	.	100	.	.	.
GCA_020287085.1_PDT001144875.1_genomic.fna	22	.	.	.	.	.	.	.	.	.	.	.	.	.	.	100.00;100.00	.	.	.	.	.	.	.	.	.	.	.	.	.	.	.	.	.	.	.	.	.	.	.	.	.	.	100	100	.	100	.	.	.
GCA_020321875.2_PDT001144876.2_genomic.fna	31	.	.	.	.	.	.	.	.	100.00;100.00	.	.	.	.	.	.	.	100.00;100.00	.	.	.	.	.	.	.	.	.	.	.	.	.	.	.	.	.	.	82.51;82.51	100.00;100.00	100.00;100.00	.	.	100.00;100.00	100	.	.	100	.	.	.
GCA_020362535.3_PDT001145890.4_genomic.fna	24	.	.	.	.	.	.	.	.	.	.	.	.	.	.	.	.	.	.	.	.	.	.	.	100.00;100.00	.	.	.	.	.	.	.	.	.	.	.	.	100.00;100.00	.	.	100.00;100.00	100.00;100.00	100	100	.	100	.	.	.
GCA_020411765.2_PDT001147861.2_genomic.fna	19	.	.	.	.	.	.	.	.	.	.	.	.	.	.	.	.	.	.	.	.	.	.	.	100.00;100.00	.	.	.	.	.	.	.	.	.	.	.	.	.	.	.	.	.	.	100	.	100	.	.	.
GCA_020411925.2_PDT001147845.2_genomic.fna	25	.	.	.	.	.	100.00;100.00	.	.	.	.	.	.	.	.	.	.	.	.	.	.	.	.	.	100.00;100.00	.	.	.	.	.	.	.	.	.	.	.	.	98.63;100.00	.	.	.	100.00;100.00	.	100	.	100	.	.	.
GCA_020448125.2_PDT001149734.2_genomic.fna	19	.	.	.	.	.	.	.	.	.	.	.	.	.	.	.	.	.	.	.	.	.	.	.	.	.	.	.	.	.	.	.	100.00;100.00	.	.	.	.	.	.	.	.	.	100	100	.	100	.	.	.
GCA_020448685.2_PDT001149689.2_genomic.fna	28	.	.	.	.	.	.	.	.	.	.	.	.	.	.	.	.	.	.	.	.	.	.	.	.	.	.	100.00;100.00	.	.	.	.	.	.	.	.	.	100.00;100.00	100.00;100.00	.	.	100.00;100.00	100	.	.	100	.	.	.
GCA_020463585.2_PDT001148918.2_genomic.fna	25	.	.	.	.	.	.	.	.	.	.	.	.	.	.	.	.	.	.	.	.	.	.	.	.	.	.	.	.	.	100.00;100.00	.	.	.	.	100.00;100.00	.	.	99.75;99.75	.	.	.	100	100	.	100	.	.	.
GCA_020519185.2_PDT001151734.2_genomic.fna	26	.	.	.	.	.	.	.	.	.	.	.	.	.	.	.	.	.	.	.	.	.	.	.	.	.	.	100.00;100.00	.	.	.	.	.	.	.	.	.	100.00;100.00	.	.	.	100.00;100.00	.	100	.	.	.	.	.
GCA_020519305.2_PDT001151731.2_genomic.fna	30	.	.	.	.	.	.	.	94.77;94.77	.	.	.	.	.	.	.	100.00;100.00	.	.	.	.	.	.	.	.	.	.	.	.	.	.	.	.	.	.	100.00;100.00	.	100.00;100.00	.	.	100.00;100.00	100.00;100.00	100	100	.	100	.	.	.
GCA_020546565.2_PDT001157680.5_genomic.fna	21	.	.	.	.	.	.	.	.	.	.	.	.	.	.	.	.	.	.	.	.	.	.	.	100.00;100.00	.	.	.	.	.	.	.	.	.	.	.	.	.	.	.	.	.	100	100	.	100	.	.	.
GCA_020551205.1_PDT001157533.5_genomic.fna	29	.	.	100.00;100.00	.	.	100.00;100.00	.	.	.	.	.	.	.	.	.	.	100	.	.	.	.	100	.	.	.	.	.	.	.	.	.	.	.	.	.	.	100.00;100.00	.	.	.	100.00;100.00	100	100	.	100	.	.	.
GCA_020557225.2_PDT001157528.7_genomic.fna	26	.	.	.	.	.	.	.	.	.	.	.	.	.	.	.	.	.	.	.	.	.	100.00;100.00	.	.	.	.	.	.	.	.	.	.	.	.	.	.	100.00;100.00	.	.	.	100.00;100.00	100	100	.	100	.	.	.
GCA_020585435.2_PDT001157076.5_genomic.fna	28	.	.	.	.	.	.	.	.	.	.	.	.	.	.	.	.	.	.	.	.	.	.	.	.	.	.	.	.	.	.	.	.	.	.	.	.	100.00;100.00	.	.	.	100.00;100.00	100	100	100.00;100.00	100	.	.	.
GCA_020606215.2_PDT001157094.6_genomic.fna	33	.	.	100.00;100.00	.	.	.	.	.	.	.	.	.	.	.	.	.	100.00;100.00	.	.	.	.	.	.	.	.	.	.	.	.	.	.	.	.	.	.	.	100.00;100.00	100.00;100.00	.	.	100.00;100.00	100	100	.	100	.	.	.
GCA_020676985.2_PDT001164104.2_genomic.fna	28	.	.	100.00;100.00	.	.	.	.	.	.	.	.	.	.	.	.	.	100.00;100.00	.	.	.	.	.	.	.	.	.	.	.	.	.	.	.	.	.	.	82.51;82.51	100.00;100.00	.	.	.	100.00;100.00	100	100	.	100	.	.	.
GCA_020677145.2_PDT001164092.2_genomic.fna	22	.	.	.	.	.	.	.	.	.	.	.	.	.	.	.	.	.	.	.	.	.	.	.	.	.	.	.	.	.	.	.	.	.	.	.	.	.	.	.	100.00;100.00	.	100	100	100.00;100.00	100	.	.	.
GCA_020677645.2_PDT001164046.2_genomic.fna	22	.	100.00;100.00	.	.	.	100.00;100.00	.	.	.	.	.	.	.	.	.	.	.	.	90.97;91.15	.	.	.	.	.	.	.	.	.	.	.	.	.	.	.	.	.	100.00;100.00	.	.	.	100.00;100.00	100	100	.	100	.	.	.
GCA_020678185.1_PDT001164002.1_genomic.fna	28	.	.	100.00;100.00	.	.	.	.	.	.	.	.	.	.	.	.	.	100.00;100.00	.	.	.	.	.	.	.	.	.	.	.	.	.	.	.	.	.	.	82.51;82.51	100.00;100.00	100.00;100.00	.	.	100.00;100.00	100	100	.	100	.	.	.
GCA_020838285.2_PDT001173443.2_genomic.fna	24	.	.	.	.	.	.	.	.	.	.	.	.	.	.	.	.	100.00;100.00	.	.	.	.	.	.	.	.	.	.	.	.	.	.	.	.	.	.	.	100.00;100.00	.	.	100.00;100.00	100.00;100.00	100	100	.	100	.	.	.
GCA_020863785.2_PDT001174142.2_genomic.fna	20	.	.	.	.	.	100.00;100.00	.	.	.	.	.	.	.	.	.	.	.	.	.	.	.	.	.	85.07;85.33	.	.	.	.	.	.	.	.	.	.	.	.	100.00;100.00	.	.	.	100.00;100.00	100	100	.	100	.	.	.
GCA_020906565.1_ASM2090656v1_genomic.fna	25	.	.	100	.	.	.	.	.	.	.	.	.	.	.	.	.	100	.	.	.	.	.	.	.	.	.	.	.	.	.	.	.	.	.	.	82.51	.	.	.	.	.	100	100	.	100	.	.	.
GCA_021027895.2_PDT001187856.2_genomic.fna	26	.	.	100.00;100.00	.	.	.	.	95.92;95.92	.	.	.	.	.	.	100.00;100.00	.	.	.	.	.	.	.	.	.	.	.	.	.	.	.	.	.	.	.	.	82.51;82.51	.	.	.	.	.	100	100	.	100	.	.	.
GCA_021028115.2_PDT001187845.2_genomic.fna	30	.	.	.	.	.	.	.	.	100	.	.	.	.	.	.	.	.	.	.	.	.	.	.	.	.	.	.	.	.	.	.	.	.	.	100.00;100.00	82.51;82.51	.	.	.	.	.	100	100	100.00;100.00	100	.	.	.
GCA_021145105.1_PDT001201044.1_genomic.fna	32	.	.	.	.	.	.	.	.	.	.	.	.	.	.	.	.	.	.	.	.	.	.	100.00;100.00	.	.	.	.	.	.	.	.	.	.	.	.	.	100.00;100.00;87.81	.	.	100.00;100.00;100.00	100.00;100.00	100	99.92	.	100	.	.	.
GCA_021192455.1_BZUAciBau14_genomic.fna	26	.	.	100	.	.	.	.	.	.	.	.	.	.	.	100	.	.	.	.	.	.	.	.	.	.	.	.	.	.	.	.	.	.	.	.	.	100	.	100	.	93.55	.	100	.	100	.	.	.
GCA_021273165.2_PDT001210509.2_genomic.fna	24	.	.	.	.	.	.	.	.	.	.	.	.	.	.	.	.	.	.	.	.	.	100.00;100.00	.	.	.	.	.	.	.	.	.	.	.	.	.	.	100.00;100.00	.	.	.	100.00;100.00	.	.	.	100	.	.	.
GCA_021274245.2_PDT001210599.2_genomic.fna	21	.	.	.	.	.	.	.	95.92;95.92	.	.	.	.	.	.	.	.	.	.	.	.	.	.	.	100.00;100.00	.	.	.	.	.	.	.	.	.	.	.	.	.	.	.	.	.	.	100	.	90.8	.	.	.
GCA_021336735.2_PDT001214303.2_genomic.fna	29	.	.	.	.	.	.	.	.	100.00;100.00	.	.	.	.	.	.	.	100.00;100.00	.	.	.	.	.	.	.	.	.	.	.	.	.	.	.	.	.	.	82.51;82.51	100.00;100.00	.	.	.	100.00;100.00	100	100	.	100	.	.	.
GCA_021460825.1_ASM2146082v1_genomic.fna	28	100	.	.	.	.	.	.	.	.	.	.	.	.	.	.	.	.	.	.	.	.	.	.	.	.	.	.	.	.	.	.	100	.	.	.	.	100	.	.	.	100	.	100	.	100	.	.	.
GCA_021578955.2_PDT001229736.2_genomic.fna	28	.	.	100.00;100.00	.	.	.	.	.	.	.	.	.	100.00;100.00	.	.	.	.	.	.	.	.	.	.	.	.	.	.	.	.	.	.	.	.	.	.	82.51;82.51	.	100.00;100.00	.	100.00;100.00	.	100	100	.	100	.	.	.
GCA_021686635.2_PDT001231512.2_genomic.fna	19	.	.	.	.	.	.	.	.	.	.	.	.	.	.	.	.	.	.	.	.	.	.	.	100.00;100.00	.	.	.	.	.	.	.	.	.	.	.	.	.	.	.	.	.	.	100	.	99.59	.	.	.
GCA_021868955.2_ASM2186895v2_genomic.fna	31	.	.	.	.	.	.	.	.	100	.	.	.	.	.	.	.	100	.	.	.	.	.	.	.	.	.	.	.	.	.	.	.	.	.	.	82.51	100	100	.	.	100	100	100	.	100	.	.	.
GCA_021869075.2_ASM2186907v2_genomic.fna	33	.	.	100	.	100	.	.	.	.	.	.	.	.	.	.	.	100	.	.	.	.	.	.	.	.	.	.	.	.	.	.	.	.	.	.	.	100	.	.	.	100	100	100	.	100	.	.	.
GCA_021899715.1_ASM2189971v1_genomic.fna	27	.	.	.	.	.	.	.	.	.	.	.	.	.	.	.	.	.	.	.	.	.	.	.	.	.	.	.	.	.	.	.	100	.	.	100.00;100.00	.	100	100	.	100.00;100.00	100	100	100	.	100	.	.	.
GCA_022107375.2_ASM2210737v2_genomic.fna	23	.	.	.	.	.	.	.	.	.	.	.	.	.	.	.	.	.	.	.	.	.	.	.	.	.	.	.	.	.	.	.	.	.	.	100	.	.	.	.	.	.	100	100	100	100	.	.	.
GCA_022237785.1_ASM2223778v1_genomic.fna	19	.	.	.	.	.	.	.	.	.	.	.	.	.	.	.	.	.	.	.	.	.	.	100	.	.	.	.	.	.	.	.	.	.	.	.	.	.	.	.	.	.	100	100	.	100	.	.	.
GCA_022238805.1_ASM2223880v1_genomic.fna	19	.	.	.	.	.	.	.	.	.	.	.	.	.	.	.	.	.	.	.	.	.	.	.	100	.	.	.	.	.	.	.	.	.	.	.	.	.	.	.	.	.	100	100	.	100	.	.	.
GCA_022240485.1_ASM2224048v1_genomic.fna	31	.	.	.	.	.	.	.	.	100	.	.	.	.	.	.	.	100	.	.	.	.	.	.	.	.	.	.	.	.	.	.	.	.	.	.	82.51	100	100	.	.	100	100	100	.	100	.	.	.
GCA_022383215.2_PDT001253790.2_genomic.fna	32	.	.	.	.	.	.	100.00;100.00	.	.	.	.	.	.	.	.	.	.	.	.	.	.	.	.	.	.	.	.	.	.	.	.	.	.	.	.	.	95.77;100.00;100.00;100.00;100.00	.	.	100.00;100.00	98.81;100.00	100	100	100.00;100.00	100	.	.	.
GCA_022383435.2_PDT001253780.2_genomic.fna	15	.	.	.	.	.	.	.	.	.	.	.	.	.	.	.	.	.	.	.	.	.	.	.	100.00;100.00	.	.	.	.	.	.	.	.	.	.	.	.	.	.	.	100.00;100.00	.	.	100	.	100	.	.	.
GCA_022395695.1_ASM2239569v1_genomic.fna	26	.	.	.	.	.	.	.	.	.	.	.	.	.	.	.	.	.	.	.	.	.	.	.	.	.	.	.	.	.	100	.	.	.	.	100	.	.	.	.	100	.	100	100	.	100	.	.	100
GCA_022395735.1_ASM2239573v1_genomic.fna	22	.	.	.	.	.	.	.	.	.	94.77	.	.	.	.	.	.	.	.	.	.	.	.	.	.	.	.	.	.	.	100	.	.	.	.	100	.	.	.	.	.	.	.	100	.	100	.	.	.
GCA_022395855.1_ASM2239585v1_genomic.fna	28	.	.	.	.	.	.	.	.	.	.	.	.	.	.	.	.	.	.	.	.	.	.	.	.	.	.	100	.	.	.	.	.	.	.	.	.	100	100	.	.	100	100	100	.	100	.	.	.
GCA_022395865.1_ASM2239586v1_genomic.fna	13	.	.	.	.	.	.	.	.	.	.	.	.	.	100	.	.	.	.	.	.	.	.	.	.	.	.	.	.	.	.	.	.	.	.	.	.	.	.	.	.	.	.	.	.	100	.	.	.
GCA_022395895.1_ASM2239589v1_genomic.fna	18	.	.	.	.	.	.	.	.	.	.	.	.	.	.	.	100	.	.	.	.	.	.	.	.	.	.	.	.	.	.	.	.	.	.	.	.	.	.	.	.	.	100	100	.	100	.	.	.
GCA_022476875.2_PDT001258031.2_genomic.fna	23	.	.	.	.	.	.	.	.	.	.	.	.	.	.	.	.	.	.	.	.	.	.	.	.	.	.	.	.	.	.	.	100.00;100.00	.	.	.	.	100.00;100.00	.	.	.	100.00;100.00	100	100	.	100	.	.	.
GCA_022588035.2_PDT001264550.2_genomic.fna	20	.	.	.	.	.	.	.	.	.	.	.	.	.	.	.	.	.	.	.	.	.	.	.	100.00;100.00	.	.	.	.	.	.	.	.	.	.	.	.	.	.	.	.	.	100	100	.	100	.	.	.
GCA_022661955.1_ASM2266195v1_genomic.fna	29	.	.	.	.	100	.	.	.	.	.	.	.	.	.	.	.	100	.	.	.	.	.	.	.	.	.	.	.	.	.	.	.	.	.	.	.	100	.	.	.	100	100	100	.	100	.	.	.
GCA_022669215.1_ASM2266921v1_genomic.fna	26	.	.	.	.	.	.	.	.	.	.	.	.	.	.	.	.	.	.	.	.	.	.	.	.	.	.	.	.	.	.	.	.	.	.	100	.	100	.	.	.	100	100	100	.	100	.	.	.
GCA_022877745.2_PDT001280821.2_genomic.fna	22	.	.	100.00;100.00	.	.	.	.	.	.	.	.	.	.	.	100.00;100.00	.	.	.	.	.	.	.	.	.	.	.	.	.	.	.	.	.	.	.	.	82.51;82.51	.	.	.	.	.	100	100	.	100	.	.	.
GCA_022930795.1_PDT001283725.1_genomic.fna	19	.	.	.	.	.	.	.	.	.	.	.	.	.	.	.	.	.	.	.	.	.	.	.	.	.	.	.	.	.	.	.	100.00;100.00	.	.	.	.	.	.	.	.	.	100	100	.	100	.	.	.
GCA_022931235.1_PDT001283691.1_genomic.fna	23	.	.	.	.	.	.	.	.	.	.	.	100.00;100.00	.	.	.	.	.	.	.	.	.	.	.	100.00;100.00;100.00	.	.	.	.	.	.	.	.	.	.	100.00;100.00	.	.	.	.	.	.	100	100	.	100	.	100.00;100.00	.
GCA_022932325.1_PDT001283688.1_genomic.fna	19	.	.	.	.	.	.	.	.	.	.	.	.	.	.	.	.	.	.	.	.	.	.	.	.	.	.	.	.	.	.	.	96.35;99.05	.	.	.	.	.	.	.	.	.	100	100	.	100	.	.	.
GCA_022933845.1_PDT001283650.1_genomic.fna	27	.	.	.	.	.	.	.	.	.	.	.	.	.	.	.	.	.	.	.	.	.	.	.	.	.	.	100.00;100.00	.	.	.	.	.	.	.	.	.	100.00;100.00	.	.	.	100.00;100.00	100	100	.	100	.	.	.
GCA_022937425.1_ASM2293742v1_genomic.fna	32	.	.	.	.	.	.	100	.	.	.	.	.	.	.	.	.	100	.	.	.	.	.	.	.	.	.	.	.	.	.	.	.	.	.	.	.	.	100	.	.	.	100	100	.	100	.	.	.
GCA_022937705.1_ASM2293770v1_genomic.fna	20	.	.	.	.	.	.	.	.	.	.	.	.	.	.	.	.	.	.	.	.	100	.	.	.	.	.	.	.	.	.	.	.	.	.	.	.	.	.	.	.	.	100	100	.	100	.	.	.
GCA_022937725.1_ASM2293772v1_genomic.fna	19	.	.	.	.	.	.	.	.	.	.	.	.	.	.	.	.	.	.	.	.	.	.	.	.	.	.	.	.	.	.	.	.	.	.	.	.	.	.	.	.	.	100	100	100	100	.	.	.
GCA_022937765.1_ASM2293776v1_genomic.fna	19	.	.	.	.	.	.	.	.	.	.	.	.	.	.	.	100	.	.	.	.	.	.	.	.	.	.	.	.	.	.	.	.	.	.	.	.	.	.	.	.	.	100	100	.	100	.	.	.
GCA_022938105.1_PDT001283677.1_genomic.fna	19	.	.	.	.	.	.	.	.	.	.	.	.	.	.	.	.	.	.	.	.	.	.	.	100.00;100.00	.	.	.	.	.	.	.	.	.	.	.	.	.	.	.	.	.	100	100	.	100	.	.	.
GCA_022958355.2_PDT001275704.2_genomic.fna	25	.	.	.	.	.	.	.	.	.	.	100.00;100.00	.	.	.	.	.	.	.	.	.	.	.	.	.	.	.	.	.	.	.	.	100.00;100.00	.	.	.	82.51;82.51	.	.	.	.	.	100	100	.	100	.	.	.
GCA_023000235.1_ASM2300023v1_genomic.fna	28	.	.	.	.	.	.	.	.	.	.	.	.	.	.	.	.	.	.	.	.	.	.	.	.	.	.	100	.	.	.	.	.	.	.	.	.	100	.	.	.	100	100	100	.	100	.	.	.
GCA_023000595.1_ASM2300059v1_genomic.fna	28	.	.	.	.	.	.	.	.	.	.	.	.	.	.	.	.	.	.	.	.	.	.	.	100	.	.	.	.	.	.	.	.	.	.	100	.	.	.	.	.	100	100	100	.	100	.	100	.
GCA_023001465.1_ASM2300146v1_genomic.fna	29	.	.	.	.	.	.	.	.	.	.	.	.	.	.	.	.	.	.	.	.	.	.	.	.	.	.	100	.	.	.	.	.	.	.	.	.	100	100	.	.	100	100	100	.	100	.	.	.
GCA_023001865.1_ASM2300186v1_genomic.fna	22	.	.	.	.	.	.	.	.	.	.	.	.	.	.	.	.	.	.	.	.	.	.	.	.	.	.	.	.	.	.	.	.	.	.	100	.	.	.	.	.	.	100	100	.	100	.	100	.
GCA_023001885.1_ASM2300188v1_genomic.fna	27	.	.	.	.	.	.	.	.	.	.	.	.	.	.	.	.	.	.	.	.	.	.	100	.	.	.	.	.	.	.	.	.	.	.	.	.	100	.	100	.	100	100	100	.	100	.	.	.
GCA_023002465.1_ASM2300246v1_genomic.fna	21	.	.	.	.	.	.	.	.	.	.	.	.	.	.	.	.	.	.	.	.	.	.	.	100	.	.	.	.	.	.	.	.	.	.	.	.	.	.	.	.	.	100	100	.	100	.	.	.
GCA_023002685.1_ASM2300268v1_genomic.fna	21	.	.	.	.	.	.	.	.	.	.	.	.	.	.	.	.	.	.	.	.	.	.	.	100	.	.	.	.	.	.	.	.	.	.	.	.	.	.	.	.	.	100	100	.	100	.	.	.
GCA_023002705.1_ASM2300270v1_genomic.fna	28	100	.	.	.	.	.	.	.	.	.	.	.	.	.	.	.	.	.	.	.	.	.	.	.	.	.	.	.	.	.	.	.	.	.	.	.	100	.	.	.	100	100	100	100	100	.	.	.
GCA_023002815.1_ASM2300281v1_genomic.fna	31	.	.	.	.	.	.	.	.	.	.	.	.	.	.	.	.	.	.	.	.	.	.	.	.	.	.	100	.	.	.	.	.	.	.	.	.	100	100	.	.	100	100	100	.	100	.	.	.
GCA_023004295.1_ASM2300429v1_genomic.fna	26	100	.	.	.	.	.	.	.	.	.	.	.	.	.	.	.	.	.	.	.	.	.	.	.	.	.	.	.	.	.	.	100	.	.	.	.	100	.	.	.	100	100	100	.	100	.	.	.
GCA_023004445.1_ASM2300444v1_genomic.fna	26	.	.	100	.	100	.	.	.	.	.	.	.	.	.	.	.	100	.	.	.	.	.	.	.	.	.	.	.	.	.	.	.	.	.	.	.	100	.	.	.	100	100	100	.	100	.	.	.
GCA_023004805.1_ASM2300480v1_genomic.fna	22	.	.	.	.	.	.	.	.	.	.	.	.	.	.	.	.	.	.	.	.	.	.	.	100	.	.	.	.	.	.	.	.	.	.	100	.	.	.	.	.	.	100	100	.	100	.	100	.
GCA_023004985.1_ASM2300498v1_genomic.fna	19	.	.	.	.	.	.	.	.	100	.	.	.	.	.	.	.	100	.	.	.	.	.	.	.	.	.	.	.	.	.	.	.	.	.	.	.	.	100	.	.	.	100	100	.	100	.	.	.
GCA_023005225.1_ASM2300522v1_genomic.fna	32	.	.	.	.	.	.	.	.	100	.	.	.	.	.	.	.	100	.	.	.	.	.	.	.	.	.	.	.	.	.	.	.	.	.	.	82.51	100	100	.	.	100	100	100	.	100	.	.	.
GCA_023005285.1_ASM2300528v1_genomic.fna	32	.	.	.	.	.	.	.	.	.	94.77	.	.	.	.	.	.	.	.	.	.	.	.	.	100	.	.	.	.	.	.	.	.	.	.	100	.	100	.	.	.	100	100	100	.	100	.	.	.
GCA_023005885.1_ASM2300588v1_genomic.fna	19	.	.	.	.	.	.	.	.	.	.	.	.	.	.	.	.	.	.	.	.	.	.	.	.	.	.	.	.	.	.	.	.	99.23	.	.	.	.	.	.	100	.	100	100	.	.	.	.	.
GCA_023005925.1_ASM2300592v1_genomic.fna	22	.	.	.	.	.	.	.	.	.	.	.	.	.	.	.	.	.	.	.	.	.	.	.	100	.	.	.	.	.	.	.	.	.	.	.	.	.	.	.	.	.	100	100	.	100	.	100	.
GCA_023006185.1_ASM2300618v1_genomic.fna	33	.	100	.	.	.	100	.	.	.	.	.	.	.	.	.	.	.	.	.	.	.	.	.	.	.	.	.	.	.	.	.	100	.	.	.	.	100	.	.	.	100	100	100	.	100	.	.	.
GCA_023006265.1_ASM2300626v1_genomic.fna	22	.	.	.	.	.	.	.	.	.	.	.	.	.	.	.	.	.	.	.	.	.	.	.	.	.	.	.	.	.	.	.	100	.	.	.	.	.	.	.	.	.	100	100	.	100	.	.	.
GCA_023060185.1_ASM2306018v1_genomic.fna	20	.	.	.	.	.	.	.	.	.	.	.	.	.	.	.	.	.	.	.	.	100	.	.	.	.	.	.	.	.	.	.	.	.	.	.	.	.	.	.	.	.	100	100	.	100	.	.	.
GCA_023061035.1_ASM2306103v1_genomic.fna	31	.	.	.	.	.	.	.	.	.	.	.	.	.	.	.	.	.	.	.	.	100	.	.	.	.	.	.	.	.	.	.	.	.	.	.	82.3	100	.	.	.	100	100	100	.	100	.	.	.
GCA_023064415.2_PDT001290925.2_genomic.fna	31	.	.	100.00;100.00	.	.	.	.	.	.	.	.	.	.	.	.	.	.	.	.	.	.	.	.	.	.	.	100.00;100.00	.	.	.	.	.	.	.	.	82.51;82.51	100.00;100.00	.	.	100.00;100.00	100.00;100.00	.	100	.	100	.	.	.
GCA_023064555.2_PDT001290919.2_genomic.fna	27	.	.	.	.	.	.	.	.	.	.	.	.	.	.	.	.	.	.	.	.	.	.	.	.	.	.	100.00;100.00	.	.	.	.	.	.	.	.	.	100.00;100.00	100.00;100.00	.	.	100.00;100.00	.	.	.	100	.	.	.
GCA_023360975.1_ASM2336097v1_genomic.fna	27	.	.	.	.	.	.	.	.	100	.	.	.	.	.	.	.	100	.	.	.	.	.	.	.	.	.	.	.	.	.	.	.	.	.	.	82.51	.	100	.	.	.	100	100	.	100	.	.	.
GCA_023361055.1_ASM2336105v1_genomic.fna	32	.	.	.	.	.	.	.	.	100	.	.	.	.	.	.	.	100	.	.	.	.	.	.	.	.	.	.	.	.	.	.	.	.	.	.	82.51	100	100.00;100.00	.	.	100	100	100	.	100	.	.	.
GCA_023397315.2_PDT001163979.2_genomic.fna	19	.	.	.	.	.	.	.	.	.	.	.	.	.	.	.	.	.	.	.	.	.	.	.	100.00;100.00	.	.	.	.	.	.	.	.	.	.	.	.	.	.	.	.	.	.	100	.	100	.	.	.
GCA_023517735.1_ASM2351773v1_genomic.fna	26	.	.	.	.	.	.	.	.	.	.	.	.	.	.	.	.	.	.	.	.	.	.	.	.	.	.	100	.	.	.	.	.	.	.	.	.	100	100	.	.	100	100	100	.	100	.	.	.
GCA_023572255.1_ASM2357225v1_genomic.fna	27	.	.	.	.	.	.	.	.	.	.	.	.	.	.	.	.	.	.	.	.	100	.	.	.	.	.	.	.	.	.	.	.	.	.	.	82.3	.	.	.	.	.	100	100	.	100	.	.	.
GCA_023572275.1_ASM2357227v1_genomic.fna	28	.	100	.	.	.	100	.	.	.	.	.	.	.	.	.	.	.	.	.	.	100	.	.	.	.	.	.	.	.	.	.	.	.	.	.	.	100	.	.	100	100	100	100	.	100	.	.	.
GCA_023572305.1_ASM2357230v1_genomic.fna	27	.	.	.	.	.	.	.	.	.	.	.	.	.	.	.	.	.	.	.	.	100	.	.	.	.	.	.	.	.	.	.	.	.	.	.	.	100	.	.	.	100	100	100	.	100	.	.	.
GCA_023572445.1_ASM2357244v1_genomic.fna	33	.	.	.	.	.	.	.	.	.	.	.	.	.	.	.	.	.	.	.	.	100	.	.	.	.	.	.	.	.	.	.	.	.	.	.	82.3	100	.	.	100	100	100	100	.	100	.	.	.
GCA_023605465.1_ASM2360546v1_genomic.fna	27	.	.	100	.	.	.	.	.	.	.	.	.	.	.	.	.	100	.	.	.	.	.	.	.	.	.	.	.	.	.	.	.	.	.	.	82.51	100	.	.	.	100	100	100	.	100	.	.	.
GCA_023615345.2_ASM2361534v2_genomic.fna	19	.	.	.	.	.	100	.	.	.	.	.	.	.	.	.	.	.	.	.	.	.	.	.	100	.	.	.	.	.	.	.	.	.	.	100	.	.	100	.	.	.	100	100	.	100	100	.	.
GCA_023615665.2_PDT001318181.2_genomic.fna	20	.	.	.	.	.	.	.	.	.	.	.	.	.	.	100.00;100.00	.	.	.	.	.	.	.	.	.	.	.	.	.	.	.	.	.	.	.	.	.	.	99.75;99.75	.	.	.	100	100	.	100	.	.	.
GCA_023809625.1_ASM2380962v1_genomic.fna	30	100	.	.	.	.	.	.	.	.	.	.	.	.	.	.	.	.	.	.	.	.	.	100	.	.	.	.	.	.	.	.	.	.	.	.	.	85.07	.	.	100	.	100	100	.	100	.	.	100
GCA_024164505.2_PDT001352967.2_genomic.fna	30	.	100.00;100.00	.	.	.	.	.	.	.	94.77;94.77	.	.	.	100.00;100.00	.	.	.	.	.	.	.	.	.	.	.	.	.	.	.	.	.	.	.	.	.	.	100.00;100.00	.	.	.	100.00;85.07;100.00	100	100	.	99.8	.	.	.
GCA_024205285.1_ASM2420528v1_genomic.fna	25	.	.	.	.	.	.	.	.	.	.	.	100	.	.	.	.	.	.	.	.	.	.	.	100	.	.	.	.	.	.	.	.	.	.	.	.	.	.	100	.	.	100	100	.	100	.	100	.
GCA_024357805.1_ASM2435780v1_genomic.fna	17	.	.	.	.	.	.	.	.	.	.	.	.	.	100	.	.	.	.	.	.	.	.	.	.	.	.	.	.	.	.	.	.	.	.	.	.	.	.	.	.	.	.	.	.	100	.	.	.
GCA_024357865.1_ASM2435786v1_genomic.fna	19	.	.	.	.	.	.	.	.	.	.	.	.	.	100	.	.	.	.	.	.	.	.	.	.	.	.	.	.	.	.	.	.	.	.	.	.	.	.	.	.	.	100	100	.	100	.	.	.
GCA_024357895.1_ASM2435789v1_genomic.fna	17	.	.	.	.	.	.	.	.	.	.	.	.	.	.	.	.	.	.	.	.	.	.	100	.	.	.	.	.	.	.	.	.	.	.	.	.	.	.	.	.	.	100	99.85	.	100	.	.	.
GCA_024417815.2_PDT001367732.2_genomic.fna	29	.	.	.	.	.	100.00;100.00	.	.	.	.	.	.	.	.	.	.	.	.	.	.	.	.	.	100.00;100.00	.	.	.	.	.	.	.	.	.	.	.	.	.	.	.	100	.	100	100	.	100	.	.	.
GCA_024468335.2_PDT001370961.2_genomic.fna	24	.	.	.	.	.	100.00;100.00	.	.	.	.	.	.	.	.	.	.	.	.	.	.	.	.	.	.	.	.	.	.	.	.	.	.	.	.	.	.	100.00;100.00	.	.	.	100.00;100.00	100	100	100.00;100.00;100.00	100	.	.	.
GCA_024505645.1_ASM2450564v1_genomic.fna	27	.	100	.	.	.	.	.	.	.	.	.	.	.	.	.	.	.	.	.	.	.	.	.	.	.	.	.	.	.	.	.	100	.	.	.	.	100	.	.	.	100	100	100	.	100	.	.	.
GCA_024519105.1_ASM2451910v1_genomic.fna	19	.	.	.	.	.	.	.	.	.	.	.	.	.	.	.	.	.	.	.	.	.	.	.	.	.	.	.	.	.	.	.	100	.	.	.	.	.	.	.	.	.	100	100	.	100	.	.	.
GCA_024533735.2_PDT001373598.2_genomic.fna	24	.	.	.	.	.	.	.	.	.	.	.	.	.	.	100.00;100.00	.	.	.	.	.	.	.	.	.	.	.	.	.	.	.	.	.	.	.	.	.	100.00;100.00	.	.	.	100.00;100.00	100	100	.	100	.	.	.
GCA_024537755.2_PDT001373644.2_genomic.fna	23	.	.	.	.	.	.	.	.	.	.	.	.	.	.	.	.	.	.	.	.	.	.	.	.	.	.	.	.	.	.	.	100.00;100.00	.	.	.	.	100.00;100.00	.	.	.	100.00;100.00	100	100	.	100	.	.	.
GCA_024538065.2_PDT001373661.2_genomic.fna	22	.	.	.	.	.	.	.	.	.	.	.	.	.	.	.	.	.	.	.	.	.	.	.	.	.	.	100.00;100.00	.	.	.	.	.	.	.	.	.	100.00;100.00	.	.	.	100.00;100.00	.	100	.	100	.	.	.
GCA_024559125.2_PDT001377809.2_genomic.fna	29	.	.	.	.	.	.	.	.	.	.	.	.	.	.	.	100.00;100.00	.	.	.	.	.	.	.	.	.	.	.	.	.	.	.	.	.	.	100.00;100.00	.	100.00;100.00	100.00;100.00	.	.	100.00;100.00	100	100	.	100	.	.	.
GCA_024560465.2_PDT001377734.2_genomic.fna	25	.	.	.	.	.	.	.	.	.	.	.	.	.	.	.	.	.	100.00;100.00	.	.	.	.	.	.	.	.	.	.	.	.	.	.	.	.	100.00;100.00	.	.	.	.	.	.	100	100	.	100	.	.	.
GCA_024589095.1_ASM2458909v1_genomic.fna	19	.	.	.	.	.	.	.	.	.	.	.	.	.	.	.	.	.	.	.	.	.	.	.	.	.	.	.	.	.	.	.	100	.	.	100	.	.	.	.	100	.	.	100	.	99.8	.	.	.
GCA_024589115.1_ASM2458911v1_genomic.fna	23	.	.	.	.	.	.	.	.	.	.	.	.	.	.	.	.	.	.	.	.	.	.	.	.	.	.	.	.	.	100	.	.	.	.	100	.	.	.	.	100	.	100	100	.	100	.	.	.
GCA_024589135.1_ASM2458913v1_genomic.fna	29	.	.	.	.	.	.	.	.	.	.	.	.	.	.	.	.	.	.	.	.	.	.	.	.	.	.	.	.	.	.	.	100	.	.	100	.	100	.	.	100	100	100	100	.	99.8	.	.	.
GCA_024649355.1_ASM2464935v1_genomic.fna	34	.	.	100	.	.	.	.	.	.	.	.	.	.	.	100	.	.	.	.	.	.	.	.	.	.	.	.	.	.	.	.	.	.	.	.	82.51	100	.	100	.	100	100	100	.	100	.	.	.
GCA_024922185.2_ASM2492218v2_genomic.fna	25	.	.	.	.	.	.	.	.	.	.	.	.	.	.	.	.	.	.	.	.	.	.	.	.	.	.	.	.	.	.	.	.	.	.	100	.	.	.	.	.	.	100	100	100	100	.	.	100
GCA_025239665.2_PDT001420004.2_genomic.fna	21	.	.	.	.	.	100.00;100.00	.	.	.	.	.	.	.	.	.	.	.	.	.	.	.	.	.	.	.	.	.	.	.	.	.	100.00;100.00	.	.	100.00;100.00	.	.	100.00;100.00	.	.	.	100	100	.	99.8	.	.	.
GCA_025240845.2_PDT001419954.2_genomic.fna	25	.	.	100.00;100.00	.	.	.	.	.	.	.	.	.	.	.	100.00;100.00	.	.	.	.	.	.	.	.	.	.	.	.	.	.	.	.	.	.	.	.	82.51;82.51	.	.	.	.	.	100	100	.	100	.	.	.
GCA_025258785.1_ASM2525878v1_genomic.fna	33	.	.	.	.	.	.	.	.	.	94.77	.	.	.	.	.	.	.	.	.	.	100	.	.	.	.	.	.	.	.	.	.	.	.	.	100	.	100	.	100	100.00;100.00	100	100	.	.	100	.	.	.
GCA_025264005.1_ASM2526400v1_genomic.fna	18	.	.	.	.	.	.	.	.	.	.	.	.	.	.	.	100	.	.	.	.	.	.	.	.	.	.	.	.	.	.	.	.	.	.	.	.	.	.	.	.	.	100	100	.	100	.	.	.
GCA_025406355.1_ASM2540635v1_genomic.fna	19	.	.	.	.	.	.	.	.	.	.	.	.	.	.	.	.	.	.	.	.	.	.	.	100	.	.	.	.	.	.	.	.	.	.	.	.	.	.	.	.	.	100	100	.	100	.	.	.
GCA_025406475.1_ASM2540647v1_genomic.fna	21	.	.	.	.	.	.	.	.	.	.	.	.	.	.	.	.	.	.	.	.	.	100	.	.	.	.	.	.	.	.	.	.	.	.	100	.	.	99.75	.	.	.	100	100	.	100	.	.	.
GCA_025406495.1_ASM2540649v1_genomic.fna	16	.	.	.	.	.	.	.	.	.	.	.	.	.	.	.	.	.	.	.	.	.	.	.	.	.	.	.	.	.	100	.	.	.	.	.	.	.	.	.	.	.	100	100	.	100	.	.	.
GCA_025406535.1_ASM2540653v1_genomic.fna	19	.	.	.	.	.	.	.	.	.	.	.	.	100	.	.	.	.	.	.	.	.	.	.	.	.	.	.	.	.	.	.	.	.	.	.	.	.	.	.	.	.	100	100	.	100	.	.	.
GCA_025406555.1_ASM2540655v1_genomic.fna	15	.	.	.	.	.	.	.	.	.	.	.	.	.	100	.	.	.	.	.	.	.	.	.	.	.	.	.	.	.	.	.	.	.	.	.	.	.	.	.	.	.	100	100	.	100	.	.	.
GCA_025406575.1_ASM2540657v1_genomic.fna	17	.	.	.	.	.	.	.	.	.	.	.	.	.	.	.	.	.	.	.	.	100	.	.	.	.	.	.	.	.	.	.	.	.	.	.	.	.	.	.	.	.	100	100	.	100	.	.	.
GCA_025406735.1_ASM2540673v1_genomic.fna	18	.	.	.	.	.	.	.	.	.	.	.	.	.	.	.	.	.	.	.	.	.	.	.	.	.	.	.	.	.	.	.	.	.	.	.	.	.	.	.	.	.	.	100	100	100	.	.	.
GCA_025406745.1_ASM2540674v1_genomic.fna	19	.	.	.	.	.	.	.	.	.	.	.	.	.	.	.	.	.	.	.	.	.	.	.	.	.	.	.	.	.	.	.	100	.	.	.	.	.	.	.	.	.	100	100	.	100	.	.	.
GCA_025406795.1_ASM2540679v1_genomic.fna	19	.	.	.	.	.	.	.	.	.	.	.	.	.	.	.	.	.	.	.	.	.	.	.	99.83	.	.	.	.	.	.	.	.	.	.	.	.	.	.	.	.	.	100	100	.	100	.	.	.
GCA_025406825.1_ASM2540682v1_genomic.fna	19	.	.	.	.	.	.	.	.	.	.	.	.	.	.	.	.	.	.	.	.	.	.	.	.	.	.	.	.	.	100	.	.	.	.	.	.	.	.	.	.	.	100	100	.	100	.	.	.
GCA_025406835.1_ASM2540683v1_genomic.fna	19	.	.	.	.	.	.	.	.	.	.	.	.	.	.	.	.	.	.	.	.	.	.	.	100	.	.	.	.	.	.	.	.	.	.	.	.	.	.	.	.	.	100	100	.	100	.	.	.
GCA_025406925.1_ASM2540692v1_genomic.fna	18	.	.	.	.	.	.	.	.	.	.	.	.	.	.	.	.	.	.	.	.	100	.	.	.	.	.	.	.	.	.	.	.	.	.	.	.	.	.	.	.	.	.	100	.	100	.	.	.
GCA_025407125.1_ASM2540712v1_genomic.fna	19	.	.	.	.	.	.	.	.	.	.	.	.	.	.	.	.	.	.	.	.	.	.	100	.	.	.	.	.	.	.	.	.	.	.	.	.	.	.	.	.	.	100	100	.	100	.	.	.
GCA_025407175.1_ASM2540717v1_genomic.fna	17	.	.	.	.	.	.	.	.	.	.	.	.	.	.	.	.	.	.	.	.	.	.	.	100	.	.	.	.	.	.	.	.	.	.	.	.	.	.	.	.	.	100	100	.	100	.	.	.
GCA_025407255.1_ASM2540725v1_genomic.fna	19	.	.	.	.	.	.	.	.	.	.	.	.	100	.	.	.	.	.	.	.	.	.	.	.	.	.	.	.	.	.	.	.	.	.	.	.	.	.	.	.	.	100	100	.	100	.	.	.
GCA_025407535.1_ASM2540753v1_genomic.fna	14	.	.	.	.	.	.	.	.	.	.	.	.	.	.	.	.	.	.	.	.	.	.	.	100	.	.	.	.	.	.	.	.	.	.	.	.	.	.	.	.	.	100	.	.	100	.	.	.
GCA_025407565.1_ASM2540756v1_genomic.fna	19	.	.	.	.	.	.	.	.	.	.	.	.	.	.	.	.	.	.	.	.	.	.	.	.	.	.	.	.	.	.	.	100	.	.	.	.	.	.	.	.	.	100	100	.	100	.	.	.
GCA_025407605.1_ASM2540760v1_genomic.fna	32	.	100	.	.	.	100	.	.	.	.	.	.	.	.	.	.	.	.	.	.	.	.	.	100	.	.	.	.	.	.	.	.	.	.	.	.	.	.	.	.	.	100	100	.	100	100	.	.
GCA_025457165.1_ASM2545716v1_genomic.fna	27	.	100	.	.	.	.	.	.	.	.	.	.	.	.	.	.	.	.	.	.	100	.	.	.	.	.	.	.	.	.	.	.	.	.	.	.	100	.	.	100	100	100	100	.	100	.	.	.
GCA_025457185.1_ASM2545718v1_genomic.fna	34	.	.	100	.	.	.	.	.	86.77	.	.	.	.	.	.	.	100	.	.	.	.	.	.	.	.	.	.	.	.	.	.	.	.	.	.	82.51	100	.	.	100	100	100	100	.	100	.	.	.
GCA_025457265.1_ASM2545726v1_genomic.fna	26	.	.	100	.	.	.	.	.	.	.	.	.	.	.	.	.	.	.	.	.	.	.	.	.	.	.	.	100	.	.	.	.	.	.	.	82.51	.	.	.	100	.	100	100	.	100	.	.	.
GCA_025732115.1_ASM2573211v1_genomic.fna	30	.	.	.	.	.	.	.	.	.	.	.	.	.	.	.	.	100	.	.	.	.	.	.	.	.	.	.	.	.	.	.	.	.	.	.	.	100	.	.	.	100	100	100	.	100	.	.	.
GCA_025826995.1_ASM2582699v1_genomic.fna	28	.	.	.	.	.	.	.	.	.	.	.	.	.	.	100	.	.	.	.	.	.	.	.	.	.	.	.	.	.	.	.	.	.	.	.	.	100	.	100	.	91.28	.	100	.	100	.	.	.
GCA_025847295.1_ASM2584729v1_genomic.fna	29	.	.	100	.	.	.	.	.	.	.	.	.	.	.	.	.	.	.	.	.	.	.	.	.	.	.	100	.	.	.	.	.	.	.	.	82.51	.	.	.	.	.	100	100	.	100	.	.	.
GCA_025854095.1_ASM2585409v1_genomic.fna	20	.	.	.	.	.	.	.	.	.	.	.	.	.	.	.	.	.	.	.	.	.	.	.	.	.	.	.	.	.	.	.	.	.	.	.	.	.	.	.	.	.	100	100	100	100	.	.	.
GCA_025916215.1_ASM2591621v1_genomic.fna	28	.	.	.	.	.	.	.	.	.	.	.	.	.	.	.	.	.	.	.	.	.	100	.	.	.	.	.	.	.	.	.	.	.	.	.	.	100	.	.	.	100	100	100	.	100	.	.	.
GCA_025938735.1_ASM2593873v1_genomic.fna	15	.	.	.	.	.	.	.	.	.	.	.	.	.	.	.	.	.	.	.	.	100	.	.	.	.	.	.	.	.	.	.	.	.	.	.	.	.	.	.	.	.	.	100	.	100	.	.	.
GCA_025938795.1_ASM2593879v1_genomic.fna	16	.	.	.	.	.	.	.	.	.	.	.	.	.	.	.	.	.	.	.	.	100	.	.	.	.	.	.	.	.	.	.	.	.	.	.	.	.	.	.	.	.	.	100	.	100	.	.	.
GCA_025938915.1_ASM2593891v1_genomic.fna	21	.	.	.	.	.	.	.	.	.	.	.	.	.	.	.	.	.	.	.	.	.	.	.	.	.	.	.	.	.	100	.	.	.	.	.	.	.	.	.	.	.	100	100	.	100	.	.	.
GCA_025950435.1_ASM2595043v1_genomic.fna	32	.	100	.	.	.	.	.	.	.	.	.	.	.	100	.	.	.	.	.	.	.	.	.	.	.	.	.	.	.	.	.	.	.	.	.	.	100	.	.	.	100	100	100	.	99.8	.	.	.
GCA_025971765.1_ASM2597176v1_genomic.fna	25	.	.	.	.	.	.	.	.	.	.	.	.	.	100	.	.	.	.	.	.	.	.	.	.	.	.	.	.	.	.	.	.	.	.	.	.	.	.	.	97.44	.	.	100	.	99.8	.	.	.
GCA_025971805.1_ASM2597180v1_genomic.fna	24	100	.	.	.	.	.	.	.	.	.	.	.	.	.	.	.	.	.	.	.	.	.	.	.	.	.	.	.	.	100	.	.	.	.	.	.	.	.	.	.	.	100	100	.	100	.	.	.
GCA_025971935.1_ASM2597193v1_genomic.fna	31	.	.	.	.	.	.	.	.	.	94.77	.	.	.	.	.	100	.	.	.	.	.	.	.	.	.	.	.	.	.	.	.	.	.	.	100	82.3	.	100	95.77	.	.	100	.	.	100	.	100	.
GCA_026069105.2_PDT001475585.2_genomic.fna	20	.	.	.	.	.	.	.	.	.	.	.	.	100.00;100.00	.	.	.	.	.	.	.	.	.	.	.	.	.	.	.	.	.	.	.	.	.	.	.	.	.	.	.	.	100	100	.	100	.	.	.
GCA_026130565.1_ASM2613056v1_genomic.fna	29	.	.	100	.	.	.	.	94.77	.	.	.	81.06	100	.	.	.	.	.	.	.	.	.	.	.	.	.	.	.	.	.	.	.	.	.	.	82.51	.	100	.	100	.	100	100	.	100	.	.	.
GCA_026179225.1_PDT001485152.1_genomic.fna	21	.	.	.	.	.	100.00;100.00	.	.	.	.	.	.	.	.	.	.	.	.	.	.	.	.	.	99.39;99.57	.	.	.	.	.	.	.	.	.	.	.	.	100.00;100.00	.	.	100	100.00;100.00	100	100	.	100	.	.	.
GCA_026204275.1_ASM2620427v1_genomic.fna	30	.	.	100	.	.	.	.	.	.	.	.	.	.	.	100	.	.	.	.	.	.	.	.	.	.	.	.	.	.	.	.	.	.	.	.	.	100	.	100	100	100	.	100	.	100	.	.	.
GCA_026239565.1_ASM2623956v1_genomic.fna	24	100	.	.	.	.	.	.	.	.	.	.	.	.	.	.	.	.	.	.	.	.	.	.	.	.	.	.	.	.	100	.	.	.	.	.	.	.	.	100	.	.	100	100	.	100	.	.	.
GCA_026304555.1_PDT001492631.1_genomic.fna	25	.	.	.	.	.	.	.	.	.	.	.	100.00;100.00	.	.	.	.	.	.	.	.	.	.	.	.	.	.	.	.	.	.	.	.	.	.	100.00;100.00	.	.	.	.	100.00;100.00	.	100	100	.	100	.	.	.
GCA_026324475.1_PDT001494922.1_genomic.fna	19	.	.	.	.	.	.	.	.	.	.	.	.	.	100.00;100.00	.	.	.	.	.	.	.	.	.	.	.	.	.	.	.	.	.	.	.	.	.	.	.	.	.	.	.	100	100	.	100	.	.	.
GCA_026327455.1_PDT001494725.1_genomic.fna	28	.	.	.	.	.	.	.	.	.	.	.	.	100.00;100.00	.	.	.	.	.	.	.	.	.	.	.	.	.	.	.	.	.	.	.	.	.	100.00;100.00	.	100.00;100.00	.	.	.	100.00;100.00	100	100	.	100	.	.	.
GCA_026347615.1_PDT001493746.1_genomic.fna	24	.	.	100.00;100.00	.	.	.	.	.	.	.	.	.	.	.	.	.	.	.	.	.	.	.	.	.	.	.	.	.	.	.	.	100.00;100.00	.	.	.	82.51;82.51	.	100.00;100.00	.	.	.	100	100	.	100	.	.	.
GCA_026348275.1_PDT001493692.1_genomic.fna	24	.	.	.	.	.	.	.	.	.	.	.	.	.	.	.	.	100.00;100.00	.	.	.	.	.	.	.	.	.	.	.	.	.	.	.	.	.	.	.	100.00;100.00	.	.	.	100.00;100.00	.	.	.	100	.	.	.
GCA_026349115.1_PDT001493612.1_genomic.fna	29	.	.	.	.	.	.	.	.	.	.	.	.	.	.	.	.	.	.	.	.	.	.	.	.	.	.	100.00;100.00	.	.	.	.	.	.	.	.	.	100.00;100.00	100.00;100.00	.	.	100.00;100.00	100	.	.	100	.	.	.
GCA_026353715.1_PDT001492767.1_genomic.fna	20	.	.	.	.	.	.	.	.	.	.	.	.	.	.	.	.	.	.	.	.	100.00;100.00	.	.	.	.	.	.	.	.	.	.	.	.	.	.	.	.	.	.	.	.	100	100	.	100	.	.	.
GCA_026554895.1_PDT001506419.1_genomic.fna	26	.	.	.	.	.	100.00;100.00	.	.	.	.	.	.	.	.	.	.	.	.	.	.	100.00;100.00	.	.	.	.	.	.	.	.	.	.	.	.	.	.	.	100.00;100.00	.	.	.	100.00;100.00	100	100	.	100	.	.	.
GCA_026554915.1_PDT001506417.1_genomic.fna	27	.	100.00;100.00	.	.	.	100.00;100.00	.	.	.	.	.	.	.	.	.	.	.	.	.	.	100.00;100.00	.	.	.	.	.	.	.	.	.	.	.	.	.	.	.	100.00;100.00	.	.	.	100.00;100.00	100	100	.	100	.	.	.
GCA_026555015.1_PDT001506412.1_genomic.fna	26	.	100.00;100.00	.	.	.	.	.	.	.	.	.	.	.	.	.	.	.	.	.	.	.	.	.	.	.	.	.	.	.	.	.	100.00;100.00	.	.	.	.	100.00;100.00	.	.	.	100.00;100.00	100	100	.	100	.	.	.
GCA_026555055.1_PDT001506411.1_genomic.fna	31	.	100.00;100.00	.	.	.	100.00;100.00	.	.	.	.	.	.	.	.	.	.	.	.	.	.	.	.	.	100.00;100.00	.	.	.	.	.	.	.	.	.	.	100.00;100.00	.	.	100.00;100.00	.	.	.	100	100	.	100	100.00;100.00	.	.
GCA_026555075.1_PDT001506408.1_genomic.fna	20	.	.	.	.	.	.	.	.	.	.	.	.	.	.	.	.	.	.	.	.	.	.	.	.	.	.	.	.	.	.	.	.	.	.	.	.	.	.	.	.	.	.	100	100.00;100.00	100	.	.	.
GCA_026555255.1_PDT001506393.1_genomic.fna	28	.	100.00;100.00	.	.	.	100.00;100.00	.	.	.	.	.	.	.	.	.	.	.	.	.	.	.	.	.	100.00;100.00	.	.	.	.	.	.	.	.	.	.	.	.	100.00;100.00	.	.	.	100.00;100.00	100	100	.	100	.	.	.
GCA_026555855.1_PDT001506359.1_genomic.fna	25	.	.	100.00;100.00	.	.	.	.	.	.	.	.	.	.	.	100.00;100.00	.	.	.	.	.	.	.	.	.	.	.	.	.	.	.	.	.	.	.	.	82.51;82.51	.	.	.	100.00;100.00;100.00	.	100	100	.	100	.	.	.
GCA_026555875.1_PDT001506360.1_genomic.fna	24	.	.	.	.	.	.	.	.	.	.	.	.	.	.	100.00;100.00	.	.	.	.	.	.	.	.	.	.	.	.	.	.	.	.	.	.	.	100.00;100.00;100.00	.	.	.	.	.	.	100	100	.	100	.	.	.
GCA_026557275.1_PDT001506299.1_genomic.fna	21	.	.	.	.	.	.	.	.	.	.	.	.	.	.	100.00;100.00	.	.	.	.	.	.	.	.	.	.	.	.	.	.	.	.	.	.	.	.	.	100.00;100.00	.	.	.	100.00;100.00	.	.	.	100	.	.	.
GCA_026558135.1_PDT001506267.1_genomic.fna	27	.	.	.	.	.	.	.	.	.	.	.	.	.	.	.	.	.	.	.	.	.	.	.	.	.	.	.	.	.	.	.	.	.	100.00;100.00	.	82.51;82.51	.	.	.	.	.	100	100	.	100	.	.	.
GCA_026558715.1_PDT001506239.1_genomic.fna	25	.	.	100.00;100.00	.	.	.	.	.	.	.	.	.	.	.	.	.	.	.	.	.	.	.	.	.	.	.	.	.	.	.	.	100.00;100.00	.	.	.	82.51;82.20	.	100.00;100.00	.	100.00;100.00	86.26;86.62	100	.	.	100	.	.	.
GCA_026558995.1_PDT001506227.1_genomic.fna	29	.	.	100.00;100.00	.	100.00;100.00	.	.	.	.	.	.	.	.	.	.	.	100.00;100.00	.	.	.	.	.	.	.	.	.	.	.	.	.	.	.	.	.	.	.	100.00;100.00	.	.	.	100.00;100.00	100	100	.	100	.	.	.
GCA_026561495.1_PDT001506100.1_genomic.fna	24	.	.	100.00;100.00	.	.	.	.	.	.	.	.	.	.	100.00;100.00	.	.	.	.	.	.	.	.	.	.	.	.	.	.	.	.	.	.	.	.	.	82.51;82.51	.	.	.	.	.	100	100	.	100	.	.	.
GCA_026561815.1_PDT001506085.1_genomic.fna	25	.	.	.	.	.	.	.	.	100.00;100.00	.	.	.	.	.	.	.	.	.	.	.	.	100.00;100.00	.	.	.	.	.	.	.	.	.	.	.	.	.	.	100.00;100.00	100.00;100.00	.	.	100.00;100.00	100	100	.	100	.	.	.
GCA_026562515.1_PDT001506049.1_genomic.fna	23	.	.	.	.	.	.	.	.	.	.	.	.	.	.	.	.	.	.	.	.	.	.	.	.	.	.	.	.	.	.	.	.	.	.	.	.	.	.	.	100.00;100.00	.	100	100	.	100	.	.	.
GCA_026562535.1_PDT001506048.1_genomic.fna	21	.	.	.	.	.	.	.	.	.	.	.	.	.	.	100.00;100.00	.	.	.	.	.	.	.	.	.	.	.	.	.	.	.	.	.	.	.	.	.	.	.	.	100.00;100.00	.	.	100	.	100	.	.	.
GCA_026565325.1_PDT001505905.1_genomic.fna	24	.	.	.	.	.	.	.	.	.	.	.	.	.	.	.	.	100.00;100.00	.	.	.	.	.	.	.	.	.	.	.	.	.	.	.	.	.	.	.	.	.	.	100.00;100.00	.	100	100	.	100	.	.	.
GCA_026565545.1_PDT001505886.1_genomic.fna	23	.	100.00;100.00;100.00	.	.	.	100.00;100.00	.	.	.	.	.	.	.	.	.	.	.	.	.	.	.	.	.	100.00;100.00	.	.	.	.	.	.	.	.	.	.	.	.	.	.	.	.	.	100	100	.	100	.	.	.
GCA_026566335.1_PDT001505856.1_genomic.fna	33	.	.	.	.	.	.	.	.	.	.	.	.	.	.	.	.	.	.	.	.	.	.	.	.	.	.	.	.	.	.	.	100.00;100.00	.	.	.	.	100.00;100.00	.	100.00;100.00	.	100.00;100.00	100	100	.	100	.	.	.
GCA_026568315.1_PDT001505763.1_genomic.fna	26	.	93.03;93.15	.	.	.	100.00;100.00	.	.	.	.	.	.	.	.	.	.	.	.	.	.	100.00;100.00	.	.	.	.	.	.	.	.	.	.	.	.	.	.	.	100.00;100.00	.	.	.	100.00;100.00	100	100	.	100	.	.	.
GCA_026568875.1_PDT001505725.1_genomic.fna	20	.	.	.	.	.	.	.	.	.	.	.	.	.	.	.	.	.	.	.	.	.	.	.	.	.	.	.	.	.	.	.	100.00;100.00	.	.	.	.	.	.	.	.	.	100	100	.	100	.	.	.
GCA_026569335.1_PDT001505702.1_genomic.fna	25	.	.	.	.	.	.	.	.	.	.	.	.	.	.	100.00;100.00;100.00	.	.	.	.	.	.	.	.	.	.	.	.	.	.	.	.	.	.	.	100.00;100.00	.	.	.	.	.	.	100	100	.	100	.	.	.
GCA_026569355.1_PDT001505701.1_genomic.fna	36	.	100.00;100.00	.	.	.	100.00;100.00	.	.	.	.	.	.	.	.	.	.	.	.	.	.	.	.	.	100.00;100.00	.	.	.	.	.	.	.	.	.	.	100.00;100.00	.	100.00;100.00	100.00;100.00	.	.	100.00;100.00	100	100	.	100	.	.	.
GCA_026569375.1_PDT001505699.1_genomic.fna	26	.	.	.	.	.	.	.	.	.	.	.	.	.	.	100.00;100.00	.	.	.	.	.	.	.	.	.	.	.	.	.	.	.	.	.	.	.	100.00;100.00	.	.	.	.	100.00;100.00	.	100	100	.	100	.	.	.
GCA_026622455.1_ASM2662245v1_genomic.fna	21	.	.	.	.	.	.	.	.	.	.	.	.	.	100	.	.	.	.	.	.	.	.	.	.	.	.	.	.	.	.	.	.	.	.	.	.	.	.	.	.	.	99.92	100	.	100	.	.	.
GCA_026622635.1_ASM2662263v1_genomic.fna	15	.	.	.	.	.	.	.	.	.	.	.	.	.	100	.	.	.	.	.	.	.	.	.	.	.	.	.	.	.	.	.	.	.	.	.	.	.	.	.	.	.	.	.	.	100	.	.	.
GCA_026805095.1_ASM2680509v1_genomic.fna	13	.	.	.	.	.	.	.	.	.	.	.	.	.	100	.	.	.	.	.	.	.	.	.	.	.	.	.	.	.	.	.	.	.	.	.	.	.	.	.	.	.	.	.	.	100	.	.	.
GCA_026805285.1_ASM2680528v1_genomic.fna	14	.	.	.	.	.	.	.	.	.	.	.	.	.	100	.	.	.	.	.	.	.	.	.	.	.	.	.	.	.	.	.	.	.	.	.	.	.	.	.	.	.	.	100	.	100	.	.	.
GCA_027084985.1_ASM2708498v1_genomic.fna	19	.	.	.	.	.	.	.	.	.	.	.	.	.	100	.	.	.	.	.	.	.	.	.	.	.	.	.	.	.	.	.	.	.	.	.	.	.	.	.	.	.	.	100	.	100	.	.	.
GCA_027085405.1_ASM2708540v1_genomic.fna	17	.	.	.	.	.	.	.	.	.	.	.	.	.	.	.	.	.	.	.	.	100	.	.	.	.	.	.	.	.	.	.	.	.	.	.	.	.	.	.	.	.	100	100	.	100	.	.	.
GCA_027085445.1_ASM2708544v1_genomic.fna	18	.	.	.	.	.	.	.	.	.	.	.	.	.	.	.	.	.	.	.	.	.	.	.	.	100	.	.	.	.	.	.	.	.	.	.	.	.	.	.	.	.	.	100	.	100	.	.	.
GCA_027085505.1_ASM2708550v1_genomic.fna	18	.	.	.	.	.	.	.	.	.	.	.	.	.	.	.	.	.	.	.	.	.	.	.	100	.	.	.	.	.	.	.	.	.	.	.	.	.	.	.	.	.	.	100	.	100	.	.	.
GCA_027085555.1_ASM2708555v1_genomic.fna	15	.	.	.	.	.	.	.	.	.	.	.	.	.	.	.	.	.	.	.	.	.	.	.	.	.	.	.	.	.	.	.	.	.	.	.	.	.	.	.	.	.	100	100	100	100	.	.	.
GCA_027085585.1_ASM2708558v1_genomic.fna	20	.	.	.	.	.	.	.	.	.	.	.	.	.	.	.	.	.	.	.	.	.	.	.	.	.	.	.	.	.	.	.	.	.	.	.	.	.	.	.	.	.	100	100	100	100	.	.	.
GCA_027085655.1_ASM2708565v1_genomic.fna	20	.	.	.	.	.	.	.	.	.	.	.	.	.	.	.	.	.	.	.	.	100	.	.	.	.	.	.	.	.	.	.	.	.	.	.	.	.	.	.	.	.	100	100	.	100	.	.	.
GCA_027085825.1_ASM2708582v1_genomic.fna	16	.	.	.	.	.	.	.	.	.	.	.	.	.	.	.	100	.	.	.	.	.	.	.	.	.	.	.	.	.	.	.	.	.	.	.	.	.	.	.	.	.	.	100	.	100	.	.	.
GCA_027085835.1_ASM2708583v1_genomic.fna	13	.	.	.	.	.	.	.	.	.	.	.	.	.	.	.	.	.	.	.	.	.	.	.	100	.	.	.	.	.	.	.	.	.	.	.	.	.	.	.	.	.	100	100	.	.	.	.	.
GCA_027085865.1_ASM2708586v1_genomic.fna	19	.	.	.	.	.	.	.	.	.	.	.	.	.	100	.	.	.	.	.	.	.	.	.	.	.	.	.	.	.	.	.	.	.	.	.	.	.	.	.	.	.	100	100	.	100	.	.	.
GCA_027085915.1_ASM2708591v1_genomic.fna	17	.	.	.	.	.	.	.	.	.	.	.	.	.	.	.	100	.	.	.	.	.	.	.	.	.	.	.	.	.	.	.	.	.	.	.	.	.	.	.	.	.	100	100	.	100	.	.	.
GCA_027085955.1_ASM2708595v1_genomic.fna	20	.	.	.	.	.	.	.	.	.	.	.	.	.	.	.	.	.	.	.	.	.	.	.	100	.	.	.	.	.	.	.	.	.	.	.	.	.	.	.	.	.	100	100	.	100	.	.	.
GCA_027086005.1_ASM2708600v1_genomic.fna	18	.	.	.	.	.	.	.	.	.	.	.	.	.	.	.	100	.	.	.	.	.	.	.	.	.	.	.	.	.	.	.	.	.	.	.	.	.	.	.	.	.	100	100	.	100	.	.	.
GCA_027086035.1_ASM2708603v1_genomic.fna	15	.	.	.	.	.	.	.	.	.	.	.	.	.	.	.	.	.	.	.	.	.	.	.	.	.	.	.	.	.	.	.	100	.	.	.	.	.	.	.	.	.	100	100	.	100	.	.	.
GCA_027086085.1_ASM2708608v1_genomic.fna	15	.	.	.	.	.	.	.	.	.	.	.	.	.	.	.	.	.	.	.	.	100	.	.	.	.	.	.	.	.	.	.	.	.	.	.	.	.	.	.	.	.	.	100	.	100	.	.	.
GCA_027086145.1_ASM2708614v1_genomic.fna	13	.	.	.	.	.	.	.	.	.	.	.	.	.	.	.	.	.	.	.	.	.	.	.	100	.	.	.	.	.	.	.	.	.	.	.	.	.	.	.	.	.	100	100	.	.	.	.	.
GCA_027086195.1_ASM2708619v1_genomic.fna	16	.	.	.	.	.	.	.	.	.	.	.	.	.	.	.	.	.	.	.	.	.	.	.	.	.	.	.	.	.	100	.	.	.	.	.	.	.	.	.	.	.	100	100	.	100	.	.	.
GCA_027086325.1_ASM2708632v1_genomic.fna	20	.	.	.	.	.	.	.	.	.	.	.	.	100	.	.	.	.	.	.	.	.	.	.	.	.	.	.	.	.	.	.	.	.	.	100	.	.	.	.	.	.	100	100	.	100	.	.	.
GCA_027086335.1_ASM2708633v1_genomic.fna	19	.	.	.	.	.	.	.	.	.	.	.	.	.	.	.	.	.	.	.	.	.	.	.	100	.	.	.	.	.	.	.	.	.	.	.	.	.	.	.	.	.	100	100	.	100	.	.	.
GCA_027086355.1_ASM2708635v1_genomic.fna	19	.	.	.	.	.	.	.	.	.	.	.	.	.	.	.	.	.	.	.	.	.	.	.	.	.	.	.	.	.	.	.	100	.	.	.	.	.	.	.	.	.	100	100	.	100	.	.	.
[truncated: 365 more rows]
[truncated: 172 more columns]

## Sheet:  S8e
Table S8e: Presence of ARGs in clinical E. coli isolates
[truncated: 2,701 more rows]
[truncated: 220 more columns]

## Sheet:  S8f
Table S8f: Presence of ARGs in clinical K. pneumoniae isolates
[truncated: 1,282 more rows]
[truncated: 215 more columns]

## Sheet:  S8g
Table S8g: Presence of ARGs in clinical P. aeruginosa isolates
[truncated: 775 more rows]
[truncated: 158 more columns]

[truncated: 5 more sheets:  S8h,  S8i, S8j,  S8k,  S8l]
